# Supplementary material for: Size-dependent plastic exposure disrupts macrophage function and tissue-specific metabolism
Source: Research Square preprint supplement (doi:10.21203/rs.3.rs-6204281/v1), 2025-03-18
Supplement: Supplementary file 1 [file 061297324a79b493fbe920ab.xlsx]

## Sheet: DEGs_KCs_NP_vs_Ctrl
	p_val	avg_log2FC	pct.1	pct.2	p_val_adj
Alb	1.27789e-142	1.82497	0.909	0.568	1.01528e-138
Malat1	7.95324e-117	0.531524	1	1	6.31885e-113
Fabp1	2.2529e-116	1.79038	0.767	0.341	1.78993e-112
Ttr	2.7506e-94	1.86757	0.672	0.27	2.18535e-90
Apoa2	8.44497e-87	1.59965	0.753	0.422	6.70953e-83
Clec4f	1.5183e-78	-0.708163	0.948	0.974	1.20629e-74
Apoe	5.34858e-78	1.04162	0.916	0.738	4.24945e-74
Rin2	4.62781e-61	-1.53464	0.382	0.649	3.67679e-57
Mup20	7.42162e-59	1.38871	0.701	0.429	5.89648e-55
Mgst1	6.86958e-52	1.74912	0.448	0.178	5.45788e-48
Gm20275	1.08578e-51	1.19965	0.628	0.359	8.6265e-48
Tcirg1	1.4899e-51	-1.27746	0.345	0.628	1.18373e-47
Mup3	3.93791e-43	1.29424	0.616	0.36	3.12867e-39
Apoa1	4.77747e-40	1.4144	0.506	0.261	3.7957e-36
Scd1	7.12301e-39	1.94971	0.313	0.106	5.65923e-35
Rbp4	2.21071e-36	1.67164	0.342	0.133	1.75641e-32
Cyp7b1	2.34642e-36	-2.07121	0.083	0.287	1.86423e-32
Etv6	2.6278e-33	-0.723961	0.663	0.807	2.08779e-29
Serpina1c	9.76319e-33	1.36316	0.41	0.201	7.75685e-29
Car3	3.20871e-32	1.93459	0.233	0.068	2.54932e-28
Fkbp5	1.0496e-31	0.660649	0.813	0.648	8.33904e-28
Serpina1b	1.31836e-30	1.71024	0.252	0.083	1.04744e-26
Gm26917	1.66736e-30	-1.03659	0.357	0.568	1.32472e-26
F630028O10Rik	1.93449e-30	1.12108	0.526	0.327	1.53695e-26
Ptprj	1.59401e-28	-0.38069	0.973	0.977	1.26644e-24
Dbi	3.97943e-28	1.82769	0.235	0.08	3.16166e-24
Vcam1	5.26057e-27	0.973886	0.535	0.343	4.17952e-23
Selenop	2.8211e-24	0.971487	0.452	0.265	2.24136e-20
Trf	3.883e-23	0.912281	0.53	0.348	3.08505e-19
Lysmd4	4.26973e-23	0.957279	0.47	0.294	3.3923e-19
Zdhhc14	9.94796e-23	-0.582095	0.822	0.869	7.90365e-19
Mid1	1.14321e-21	-2.95027	0.019	0.125	9.0828e-18
Arrb2	2.7309e-21	-0.714758	0.448	0.613	2.1697e-17
Tmsb4x	3.95906e-21	0.662779	0.67	0.494	3.14547e-17
Cyth4	5.98061e-21	-0.997077	0.297	0.463	4.7516e-17
Taco1	6.16713e-21	-1.75908	0.063	0.195	4.89979e-17
Fth1	2.29029e-20	0.949132	0.379	0.209	1.81963e-16
Serpina1a	2.61109e-20	1.50911	0.214	0.083	2.07451e-16
Apoc1	4.2785e-20	0.620641	0.682	0.523	3.39927e-16
Phlpp1	9.14327e-20	-1.07978	0.258	0.417	7.26433e-16
Pld4	2.4531e-19	-0.905268	0.324	0.486	1.94899e-15
Man2a1	6.26143e-19	-0.622701	0.592	0.711	4.9747e-15
Neat1	6.4287e-19	-0.480131	0.7	0.809	5.1076e-15
Apoc3	8.20151e-19	1.04234	0.32	0.168	6.5161e-15
Gm2245	8.45819e-19	0.816399	0.48	0.319	6.72004e-15
Egfr	8.87166e-19	-1.22724	0.152	0.304	7.04853e-15
Clec1a	1.57301e-18	1.12344	0.304	0.159	1.24975e-14
Bhmt	7.44637e-18	1.65078	0.151	0.049	5.91614e-14
Fgb	5.13563e-17	1.12967	0.283	0.149	4.08025e-13
Gm47283	1.1036e-16	-0.552611	0.471	0.619	8.76808e-13
Fgg	1.13688e-16	1.22536	0.224	0.103	9.03251e-13
5330438D12Rik	1.193e-16	0.872363	0.366	0.225	9.4784e-13
Cd81	3.41807e-16	0.944442	0.321	0.182	2.71565e-12
C4b	6.88037e-16	-1.05454	0.225	0.367	5.46645e-12
Lepr	7.92851e-16	-1.08402	0.201	0.344	6.29921e-12
Hamp	9.73791e-16	1.29408	0.2	0.089	7.73677e-12
Rgl1	1.85243e-15	-0.46417	0.662	0.761	1.47175e-11
Maf	2.31225e-15	0.381414	0.83	0.723	1.83708e-11
Gm12353	4.60782e-15	1.0646	0.25	0.129	3.66091e-11
Kcnj16	5.64065e-15	0.588361	0.621	0.486	4.4815e-11
Gc	7.47408e-15	1.11524	0.27	0.146	5.93816e-11
H2-K1	8.61442e-15	-0.549247	0.578	0.71	6.84416e-11
Gsta3	1.81492e-14	1.45715	0.146	0.056	1.44196e-10
Epn1	1.92349e-14	-1.0339	0.188	0.319	1.52821e-10
Abcg3	3.36604e-14	0.434862	0.749	0.62	2.67432e-10
Ifi203	7.31848e-14	0.475692	0.66	0.532	5.81453e-10
Stat1	8.72199e-14	-0.781042	0.303	0.436	6.92962e-10
Timd4	1.6667e-13	-0.438134	0.626	0.738	1.32419e-09
Chchd2	1.81264e-13	1.44288	0.157	0.066	1.44014e-09
Gab2	2.24492e-13	-0.281527	0.913	0.931	1.78359e-09
BC005537	3.42675e-13	-0.411909	0.706	0.792	2.72255e-09
Ubb	4.03442e-13	1.31552	0.171	0.077	3.20535e-09
Gm42418	4.64918e-13	-0.274466	0.971	0.985	3.69378e-09
Selenbp2	9.01617e-13	-2.88832	0.01	0.07	7.16334e-09
Hivep2	1.28828e-12	-0.734268	0.308	0.445	1.02354e-08
Stat2	3.99344e-12	-0.653565	0.267	0.399	3.17279e-08
St3gal4	5.2853e-12	-0.397284	0.694	0.77	4.19917e-08
Fes	5.77147e-12	-0.828138	0.216	0.335	4.58543e-08
Apoh	5.88535e-12	1.4367	0.128	0.051	4.67591e-08
Camk1d	8.17122e-12	-0.259918	0.965	0.978	6.49203e-08
Thrb	8.80167e-12	-0.418666	0.715	0.787	6.99293e-08
Uvrag	9.82076e-12	-0.398811	0.753	0.81	7.80259e-08
C1qa	1.03613e-11	0.529214	0.516	0.389	8.23207e-08
Trps1	1.72862e-11	-0.501685	0.592	0.694	1.37339e-07
Gm22146	2.24511e-11	1.53073	0.123	0.05	1.78374e-07
Serpina1d	2.27409e-11	1.21838	0.146	0.065	1.80677e-07
Plxnb2	2.27438e-11	-1.1416	0.107	0.208	1.807e-07
Serpina1e	2.34143e-11	0.694306	0.318	0.201	1.86026e-07
Ctsl	3.18302e-11	1.13321	0.141	0.061	2.52891e-07
Ssh2	3.35149e-11	0.321313	0.882	0.835	2.66276e-07
Gbp4	3.84689e-11	-1.31407	0.085	0.175	3.05636e-07
App	4.08153e-11	-0.515218	0.487	0.604	3.24278e-07
Ttc36	4.70387e-11	1.32971	0.113	0.043	3.73723e-07
Vsig4	4.77309e-11	0.344813	0.812	0.751	3.79222e-07
Cd163	5.95409e-11	0.402028	0.785	0.718	4.73052e-07
Csf2ra	6.48326e-11	0.605832	0.409	0.293	5.15095e-07
Tsc22d3	7.97086e-11	0.669052	0.327	0.213	6.33285e-07
Creg1	9.06278e-11	0.739648	0.281	0.175	7.20037e-07
Tdo2	9.9629e-11	0.891885	0.213	0.117	7.91552e-07
Dhx40	1.02567e-10	1.39035	0.204	0.115	8.14898e-07
Lrmda	1.06188e-10	-0.286217	0.902	0.939	8.43666e-07
Adap2os	1.09056e-10	0.554405	0.495	0.379	8.66447e-07
Itpr1	1.46934e-10	-0.699446	0.23	0.345	1.16739e-06
Srsf7	1.65586e-10	0.688492	0.348	0.237	1.31558e-06
Cyp3a11	1.81834e-10	1.37111	0.102	0.037	1.44467e-06
Acaa1b	1.82582e-10	1.39391	0.122	0.052	1.45061e-06
Pkp4	1.84032e-10	-0.408758	0.632	0.72	1.46214e-06
Rgn	2.34676e-10	1.35414	0.104	0.039	1.8645e-06
Rps18	2.87508e-10	1.36815	0.127	0.056	2.28425e-06
Slc38a4	3.93809e-10	1.08394	0.128	0.056	3.12881e-06
Id3	3.99607e-10	0.800544	0.242	0.143	3.17488e-06
Ugt2b5	4.09983e-10	1.41025	0.104	0.04	3.25731e-06
Ptgs1	4.31607e-10	-0.470237	0.527	0.62	3.42912e-06
AY036118	5.50333e-10	-0.341403	0.838	0.877	4.3724e-06
Serpina3k	6.35024e-10	0.750736	0.407	0.299	5.04527e-06
B2m	6.54923e-10	0.501117	0.453	0.335	5.20336e-06
Cat	7.04088e-10	0.645547	0.292	0.186	5.59398e-06
mt-Nd4	7.25131e-10	0.765862	0.255	0.155	5.76117e-06
Cd44	7.36223e-10	-0.407179	0.698	0.749	5.84929e-06
Eif1	7.84768e-10	0.935647	0.208	0.12	6.23498e-06
Cyp2e1	8.6948e-10	0.899013	0.229	0.135	6.90802e-06
Ctnnd1	8.86744e-10	0.327628	0.82	0.742	7.04518e-06
Pde7b	1.13879e-09	-0.324966	0.846	0.89	9.04769e-06
Abca9	1.49895e-09	0.524252	0.506	0.399	1.19092e-05
Gm26749	1.60128e-09	1.24871	0.129	0.059	1.27222e-05
Tmcc3	1.66092e-09	-0.277716	0.832	0.882	1.3196e-05
Rpl9	1.73937e-09	1.12078	0.147	0.073	1.38193e-05
Hsd11b1	1.81942e-09	2.39775	0.052	0.011	1.44553e-05
Rida	1.93479e-09	1.20022	0.114	0.049	1.53719e-05
Eef1a1	1.93533e-09	0.635126	0.375	0.27	1.53762e-05
Cd74	2.01198e-09	-0.451675	0.477	0.577	1.59852e-05
Nlrc5	2.73002e-09	-0.706805	0.184	0.288	2.169e-05
Slc3a2	3.32746e-09	1.15029	0.171	0.094	2.64367e-05
Apoc4	3.41236e-09	1.15779	0.141	0.069	2.71112e-05
Usp50	3.7313e-09	0.798203	0.231	0.142	2.96451e-05
Gm48678	3.77812e-09	0.722256	0.257	0.16	3.00172e-05
Ubc	3.84801e-09	0.882071	0.224	0.136	3.05725e-05
Scp2	4.07479e-09	0.618202	0.41	0.31	3.23742e-05
Hspa5	4.7876e-09	0.587932	0.321	0.215	3.80375e-05
Mef2a	5.27131e-09	0.264943	0.91	0.894	4.18806e-05
Tpt1	5.76253e-09	0.74064	0.268	0.173	4.57833e-05
Ext1	6.37644e-09	-0.444025	0.655	0.711	5.06608e-05
Ccdc148	6.89731e-09	0.492404	0.539	0.449	5.47992e-05
Samd4	7.43962e-09	0.392141	0.666	0.575	5.91078e-05
Ddt	8.03903e-09	1.70716	0.078	0.027	6.38701e-05
Dpyd	8.26337e-09	-0.923774	0.141	0.23	6.56525e-05
Slc40a1	9.12557e-09	0.222558	0.954	0.932	7.25026e-05
Mafb	9.46821e-09	0.471332	0.399	0.289	7.5225e-05
Rsf1os1	1.16909e-08	1.24666	0.107	0.047	9.28844e-05
Cfp	1.23989e-08	-0.577465	0.356	0.454	9.85094e-05
Cth	1.28731e-08	1.75548	0.06	0.017	0.000102277
Colec12	1.4028e-08	0.999059	0.209	0.126	0.000111453
Dusp1	1.42655e-08	0.561212	0.363	0.259	0.00011334
Kng1	1.60121e-08	1.09072	0.12	0.056	0.000127216
A330023F24Rik	1.7246e-08	-0.594635	0.256	0.361	0.000137019
Svil	1.75786e-08	-0.611501	0.26	0.362	0.000139662
Arhgap39	1.91916e-08	0.587373	0.326	0.226	0.000152477
Cebpb	1.97573e-08	0.504678	0.386	0.285	0.000156972
Parp14	1.99895e-08	-0.449242	0.461	0.556	0.000158817
Ndufa4	2.27099e-08	1.16711	0.109	0.049	0.00018043
Trpm2	2.38505e-08	-0.338181	0.654	0.722	0.000189493
Rps14	2.52243e-08	0.867999	0.165	0.09	0.000200407
Tnfaip2	3.09802e-08	-0.646495	0.306	0.406	0.000246138
Cyp8b1	3.17439e-08	3.44677	0.033	0.004	0.000252205
Ahsg	3.70636e-08	0.896328	0.214	0.133	0.000294471
AC171003.1	3.85222e-08	1.69796	0.059	0.018	0.000306059
Manf	4.37968e-08	0.928613	0.148	0.079	0.000347965
Cyp2d9	4.6149e-08	1.36111	0.1	0.044	0.000366654
Rps23	4.90957e-08	0.945778	0.151	0.082	0.000390065
F2	4.94021e-08	1.5415	0.08	0.031	0.0003925
Rps13	4.94502e-08	1.06254	0.128	0.065	0.000392882
Gphn	5.07804e-08	-0.322505	0.645	0.725	0.00040345
Gnaq	5.36977e-08	-0.215121	0.858	0.89	0.000426628
Zfp36l1	5.40372e-08	0.678155	0.256	0.168	0.000429326
Arhgap15	5.45527e-08	-0.286923	0.803	0.819	0.000433421
Ccnd3	5.52275e-08	0.562649	0.387	0.293	0.000438782
H2-D1	5.59451e-08	0.377117	0.562	0.458	0.000444484
Cox8a	5.84093e-08	0.994827	0.121	0.059	0.000464062
Gm13684	5.89829e-08	1.11486	0.149	0.082	0.000468619
C8g	6.25911e-08	1.52313	0.074	0.027	0.000497286
Ass1	6.54513e-08	0.869162	0.147	0.079	0.000520011
Rnf213	7.32701e-08	-0.319935	0.576	0.66	0.000582131
Arfgap1	7.61148e-08	-1.20779	0.047	0.108	0.000604732
Cox7c	7.75116e-08	0.806087	0.179	0.105	0.00061583
Rarres2	8.937e-08	1.87111	0.061	0.02	0.000710045
Sik3	9.49716e-08	-0.632195	0.246	0.338	0.000754549
Rps7	9.49871e-08	0.8488	0.142	0.075	0.000754672
Hpcal1	1.02805e-07	-0.446967	0.524	0.6	0.000816789
mt-Atp6	1.06532e-07	0.519863	0.396	0.3	0.000846396
Gm26827	1.13598e-07	0.939591	0.116	0.056	0.000902537
Rpl23	1.19194e-07	0.766887	0.227	0.148	0.000946993
Mtss1	1.37706e-07	0.876435	0.188	0.114	0.00109408
Rpl35a	1.40095e-07	0.927855	0.164	0.094	0.00111305
Orm1	1.53512e-07	1.15462	0.099	0.045	0.00121965
Entr1	1.60199e-07	-0.986275	0.083	0.152	0.00127278
Sap25	1.62343e-07	-0.699094	0.162	0.249	0.00128982
Grina	1.63324e-07	-0.667328	0.194	0.284	0.00129761
Rps5	1.6645e-07	1.41875	0.091	0.04	0.00132244
Maml3	1.67812e-07	-0.62698	0.251	0.346	0.00133326
A930037H05Rik	1.75587e-07	0.845944	0.249	0.17	0.00139504
Uqcrb	1.91324e-07	1.38363	0.073	0.028	0.00152007
Fam117b	1.92738e-07	0.518766	0.384	0.288	0.00153131
Casp7	1.95187e-07	-1.43224	0.044	0.1	0.00155076
Pten	1.97014e-07	0.312036	0.728	0.639	0.00156528
C1qc	2.00263e-07	0.375783	0.466	0.363	0.00159109
H2-Q10	2.00703e-07	0.814688	0.175	0.103	0.00159459
Far1os	2.05033e-07	1.1345	0.11	0.054	0.00162898
Stk39	2.16575e-07	-1.19698	0.061	0.123	0.00172068
Cers6	2.17743e-07	-0.353003	0.723	0.755	0.00172997
Sephs2	2.3364e-07	1.16158	0.1	0.046	0.00185627
mt-Nd1	2.61508e-07	0.742196	0.214	0.135	0.00207768
Zfp36	2.77083e-07	0.780937	0.174	0.104	0.00220142
Pnn	2.82597e-07	0.638487	0.275	0.19	0.00224523
Akap8l	3.04283e-07	-0.75058	0.16	0.243	0.00241753
Gsdmd	3.23628e-07	-0.822457	0.127	0.204	0.00257123
Gm28379	3.30337e-07	1.28514	0.086	0.037	0.00262453
Oaz1	3.58795e-07	1.05713	0.154	0.089	0.00285062
Pik3ap1	3.63836e-07	-0.332953	0.632	0.703	0.00289068
Cblb	4.76051e-07	-0.626527	0.204	0.291	0.00378223
Akr1c6	5.82563e-07	1.04888	0.112	0.056	0.00462846
Ankrd12	5.92559e-07	0.40004	0.415	0.318	0.00470788
Ikbke	6.39631e-07	-0.699044	0.18	0.261	0.00508187
Ttc39c	6.45289e-07	-0.731358	0.123	0.199	0.00512682
Gm42917	7.32058e-07	0.804369	0.189	0.119	0.0058162
Mir133a-1hg	7.45036e-07	1.43675	0.062	0.023	0.00591931
Pstpip2	7.86054e-07	-0.608447	0.212	0.297	0.0062452
Itm2b	7.95147e-07	0.338737	0.593	0.51	0.00631745
G0s2	8.02037e-07	1.54637	0.063	0.023	0.00637219
Azgp1	8.16476e-07	1.08828	0.098	0.047	0.0064869
Gm10800	8.50618e-07	-1.48537	0.039	0.088	0.00675816
Tcf25	9.42446e-07	-0.464009	0.348	0.435	0.00748773
Herpud1	9.5634e-07	0.728991	0.17	0.102	0.00759812
Pitpnc1	1.00762e-06	-0.210633	0.909	0.936	0.00800556
Gjb2	1.17668e-06	3.10455	0.026	0.004	0.0093487
Plg	1.25853e-06	1.04326	0.108	0.056	0.00999903
Mat1a	1.28122e-06	0.867601	0.121	0.065	0.0101793
Fam193b	1.30714e-06	-0.753719	0.151	0.225	0.0103852
2610020C07Rik	1.35242e-06	0.863735	0.139	0.079	0.010745
Aldob	1.41629e-06	0.580166	0.236	0.157	0.0112524
Rps27a	1.63694e-06	0.656666	0.17	0.104	0.0130055
Eif4a1	1.88196e-06	-0.577159	0.219	0.301	0.0149522
Otc	1.92568e-06	1.423	0.053	0.018	0.0152995
AC163685.1	2.00837e-06	1.30222	0.068	0.028	0.0159565
Gamt	2.01113e-06	2.36101	0.033	0.007	0.0159784
Axl	2.05056e-06	-0.394899	0.447	0.537	0.0162917
Washc4	2.18202e-06	0.391856	0.462	0.375	0.0173362
Cd38	2.21179e-06	0.329381	0.658	0.601	0.0175727
Cfh	2.24968e-06	0.271832	0.661	0.584	0.0178737
Gm44686	2.29529e-06	1.11921	0.097	0.049	0.0182361
Rin3	2.33442e-06	-0.731038	0.15	0.223	0.018547
Slc22a30	2.33682e-06	-1.2961	0.034	0.08	0.018566
Chchd10	2.61664e-06	1.01812	0.088	0.042	0.0207892
Slco3a1	2.63756e-06	-1.55904	0.029	0.072	0.0209554
Cd55	2.98293e-06	0.951915	0.133	0.077	0.0236994
Adgb	3.00336e-06	-0.267857	0.67	0.742	0.0238617
Gm15563	3.04302e-06	0.94362	0.126	0.071	0.0241768
Ifi207	3.11924e-06	0.30999	0.612	0.525	0.0247823
Cyp4a14	3.71238e-06	2.538	0.032	0.007	0.0294948
Uba7	3.82553e-06	-0.908578	0.097	0.159	0.0303939
Hpgd	3.85392e-06	0.307162	0.733	0.693	0.0306194
mt-Co2	3.96261e-06	0.519655	0.357	0.277	0.0314829
H2afz	4.00941e-06	0.86149	0.113	0.061	0.0318548
A330040F15Rik	4.70547e-06	-0.549395	0.282	0.36	0.037385
Stx8	5.28504e-06	-0.437163	0.304	0.39	0.0419896
Klf2	5.35714e-06	0.582514	0.208	0.139	0.0425625
Rpl11	5.35891e-06	0.776011	0.154	0.094	0.0425765
Gm10135	5.42597e-06	1.35478	0.068	0.03	0.0431093
Btg2	5.87902e-06	0.922541	0.123	0.07	0.0467088
Irgm1	5.88558e-06	-0.972907	0.065	0.119	0.0467609
Appl2	5.9594e-06	0.536762	0.301	0.223	0.0473475
Ces1c	6.28571e-06	0.998241	0.078	0.036	0.0499399
Rpl30	6.3968e-06	0.81194	0.14	0.084	0.0508226
Apoa5	6.48534e-06	0.814218	0.131	0.076	0.0515261
Fga	6.63063e-06	0.782481	0.171	0.109	0.0526803
Ank2	6.76439e-06	0.295459	0.626	0.546	0.053743
Nrn1	6.77661e-06	1.63287	0.038	0.011	0.0538402
E530011L22Rik	7.19454e-06	1.42831	0.066	0.028	0.0571606
Snx24	7.34943e-06	0.243316	0.796	0.751	0.0583913
Rps10	7.43272e-06	0.853565	0.111	0.061	0.059053
Gbp7	7.47426e-06	-0.795585	0.093	0.154	0.059383
Fcna	7.91867e-06	-0.42206	0.345	0.423	0.0629138
Txnip	8.07638e-06	0.492774	0.254	0.179	0.0641669
Gbp8	8.16296e-06	-0.331668	0.477	0.563	0.0648547
Arrdc3	8.6316e-06	0.559291	0.276	0.202	0.0685781
Gpx1	8.71979e-06	0.4355	0.343	0.26	0.0692788
Helz2	8.9695e-06	-0.425569	0.326	0.406	0.0712627
Serpinc1	9.05356e-06	0.875837	0.118	0.067	0.0719305
2410002F23Rik	9.07734e-06	-1.14716	0.038	0.082	0.0721194
Ppia	9.29584e-06	0.735142	0.166	0.106	0.0738554
Tap1	9.74392e-06	-0.896659	0.068	0.123	0.0774154
Pkd2l2	9.76367e-06	0.915088	0.113	0.063	0.0775723
Fetub	9.93578e-06	1.83373	0.04	0.013	0.0789398
H2-Ab1	1.04077e-05	-0.555311	0.198	0.275	0.0826895
Cst3	1.04107e-05	0.794625	0.142	0.086	0.0827126
Tent5a	1.10387e-05	0.347559	0.486	0.401	0.0877021
Nbea	1.11741e-05	-1.16871	0.045	0.092	0.0887783
Pik3cd	1.13658e-05	-0.412584	0.446	0.525	0.0903012
Ambp	1.17244e-05	0.747834	0.112	0.061	0.0931501
Mitf	1.22903e-05	0.210533	0.825	0.771	0.0976462
Hsp90ab1	1.24348e-05	0.578969	0.192	0.127	0.0987945
Ttc39b	1.29389e-05	-0.565769	0.208	0.278	0.1028
Inmt	1.29557e-05	2.1232	0.03	0.007	0.102933
Gstm1	1.29594e-05	1.01714	0.101	0.055	0.102962
Rpl17	1.35268e-05	0.790605	0.132	0.079	0.10747
Iigp1	1.35997e-05	-0.571846	0.183	0.255	0.10805
Rpl10	1.375e-05	0.649464	0.148	0.091	0.109244
Brip1os	1.40454e-05	0.557843	0.168	0.106	0.11159
Srsf2	1.40587e-05	0.337367	0.551	0.475	0.111697
Elovl2	1.41131e-05	1.23241	0.056	0.023	0.112129
Nfia	1.41551e-05	-0.386005	0.506	0.575	0.112462
Ces1d	1.42163e-05	1.6517	0.043	0.015	0.112948
Gm19710	1.43916e-05	0.922023	0.117	0.067	0.114341
Rftn1	1.55859e-05	0.366591	0.312	0.227	0.12383
Cep85	1.58506e-05	0.590198	0.211	0.145	0.125933
Gm46367	1.59295e-05	1.05938	0.081	0.04	0.12656
Adh1	1.60165e-05	1.10392	0.073	0.035	0.127251
Frmd4b	1.60676e-05	-0.142333	0.978	0.982	0.127657
Rgl2	1.64921e-05	-0.58455	0.198	0.271	0.13103
Hspe1	1.68108e-05	1.50938	0.052	0.02	0.133561
Apob	1.68606e-05	0.638045	0.242	0.174	0.133958
Morrbid	1.69466e-05	-0.45868	0.286	0.363	0.134641
Dmwd	1.73169e-05	-1.13259	0.048	0.094	0.137583
Ddx17	1.78276e-05	-0.318093	0.501	0.575	0.14164
Gapdh	1.78732e-05	0.958774	0.077	0.037	0.142002
Nr1h3	1.80883e-05	-0.4686	0.4	0.467	0.143711
Gm37240	1.82282e-05	0.502754	0.301	0.227	0.144823
Serinc3	1.84244e-05	0.222265	0.604	0.509	0.146382
Rpl37a	1.91553e-05	0.64238	0.162	0.104	0.152189
Alpk1	1.97404e-05	-0.554773	0.24	0.314	0.156837
Zmynd8	2.06394e-05	-0.369024	0.4	0.482	0.16398
Tubb2a	2.16539e-05	1.88696	0.037	0.011	0.17204
Fyb	2.26318e-05	0.179027	0.923	0.902	0.17981
Ulk2	2.30363e-05	0.322568	0.581	0.511	0.183023
6430590A07Rik	2.36631e-05	2.02707	0.029	0.007	0.188003
Naaladl2	2.39052e-05	-1.30065	0.026	0.063	0.189927
Mrpl24	2.40571e-05	-1.18048	0.049	0.094	0.191134
Dcn	2.42538e-05	1.49112	0.062	0.027	0.192697
Rps16	2.45486e-05	0.657572	0.148	0.092	0.195038
Rasal2	2.46581e-05	0.355218	0.466	0.398	0.195908
Fdps	2.5069e-05	1.53304	0.042	0.015	0.199173
Chsy3	2.50908e-05	-1.9468	0.01	0.037	0.199346
Atp13a2	2.52859e-05	-0.51303	0.278	0.349	0.200896
Zfand3	2.55246e-05	-0.216186	0.723	0.767	0.202793
Cdo1	2.60382e-05	0.821012	0.132	0.08	0.206873
Mertk	2.61399e-05	0.15258	0.963	0.947	0.207681
Pgrmc1	2.62193e-05	0.736151	0.106	0.059	0.208312
Maml2	2.66175e-05	-0.239531	0.675	0.737	0.211476
Gpd2	2.69182e-05	-0.684629	0.116	0.177	0.213865
Tma7	2.82444e-05	1.31633	0.066	0.031	0.224402
Sntg1	2.83979e-05	-1.7566	0.008	0.033	0.225622
Rps3a1	2.88447e-05	0.813362	0.154	0.101	0.229171
Senp3	2.91068e-05	-0.612637	0.097	0.155	0.231253
Gnmt	2.96271e-05	0.718959	0.121	0.071	0.235387
Klf10	2.98331e-05	-0.937155	0.059	0.106	0.237024
Hmgcs1	2.99267e-05	1.13664	0.067	0.032	0.237768
Mbl2	3.08864e-05	1.86135	0.039	0.013	0.245393
Snrnp70	3.48119e-05	-0.370649	0.374	0.45	0.276581
Gm10563	3.55663e-05	1.58408	0.04	0.014	0.282574
Cox7b	3.63152e-05	0.906635	0.099	0.056	0.288524
Gm16268	3.67814e-05	0.742968	0.122	0.073	0.292228
Hck	3.68246e-05	-0.33259	0.533	0.594	0.292572
Rnf169	3.81357e-05	0.333957	0.556	0.497	0.302988
Mettl9	3.81838e-05	0.584792	0.193	0.131	0.30337
Rps26	3.88566e-05	0.829411	0.107	0.061	0.308715
Rapgef4	4.09127e-05	-0.949684	0.041	0.083	0.325051
Zbtb20	4.38032e-05	-0.161972	0.917	0.925	0.348017
Rps25	4.39778e-05	0.917664	0.119	0.073	0.349404
Rufy3	4.4765e-05	-0.24718	0.535	0.604	0.355658
Hnrnpa2b1	4.47728e-05	0.239175	0.621	0.552	0.35572
Slc29a1	4.56722e-05	0.460235	0.341	0.267	0.362865
Ifitm3	4.63219e-05	0.77004	0.165	0.109	0.368027
Aig1	4.66914e-05	-0.509353	0.261	0.335	0.370963
Tmem131l	4.70081e-05	-0.546939	0.163	0.227	0.37348
Mif	4.77993e-05	1.8953	0.033	0.01	0.379766
Gm20404	4.91225e-05	0.650794	0.172	0.115	0.390278
Ces1f	5.04244e-05	1.80591	0.033	0.01	0.400622
Inpp4b	5.21657e-05	0.655789	0.173	0.117	0.414456
Slc8b1	5.22809e-05	-0.333514	0.386	0.468	0.415372
Angptl3	5.2629e-05	0.912767	0.063	0.029	0.418137
Cox6c	5.46858e-05	0.875937	0.103	0.059	0.434479
Wipf1	5.53714e-05	-0.293233	0.639	0.675	0.439926
Atp5g3	5.74956e-05	0.947877	0.094	0.053	0.456803
Rpl24	5.75104e-05	0.651271	0.123	0.075	0.45692
Colec11	5.78557e-05	4.86157	0.013	0.001	0.459664
Sat1	5.82871e-05	0.212334	0.795	0.746	0.463091
Rpl19	5.83013e-05	0.623836	0.152	0.099	0.463204
Glo1	5.9034e-05	0.856	0.085	0.045	0.469025
Btbd9	5.92999e-05	-0.273589	0.565	0.625	0.471137
Shq1	6.08784e-05	-0.910204	0.059	0.104	0.483679
Pid1	6.17945e-05	-0.32892	0.542	0.604	0.490958
Sbf1	6.21941e-05	-0.899264	0.052	0.096	0.494132
Trim25	6.88392e-05	-0.276581	0.468	0.545	0.546928
Atxn7	6.94606e-05	-0.35601	0.395	0.463	0.551864
6530409C15Rik	7.00793e-05	0.85291	0.122	0.075	0.55678
Cyp2d10	7.23397e-05	1.01295	0.061	0.028	0.574739
4732471J01Rik	7.26161e-05	0.432974	0.266	0.202	0.576935
Gm12216	7.26214e-05	-0.924592	0.061	0.106	0.576977
Dusp10	7.30679e-05	-0.854619	0.068	0.115	0.580525
Ephx1	7.66345e-05	0.725496	0.111	0.065	0.608861
Rnf13	7.75397e-05	0.270189	0.492	0.409	0.616053
Rbis	7.90498e-05	1.01903	0.066	0.032	0.62805
Nme2	7.97431e-05	0.976537	0.078	0.041	0.633559
Sc5d	8.00308e-05	0.907409	0.071	0.036	0.635844
Rpl15	8.21194e-05	0.915425	0.091	0.051	0.652439
Prrc2a	8.23802e-05	-0.667512	0.086	0.137	0.654511
Cd48	8.28804e-05	0.396837	0.34	0.272	0.658485
Wfdc21	8.37689e-05	0.95256	0.066	0.032	0.665544
Nfe2l2	8.40707e-05	-0.394739	0.29	0.362	0.667942
Stk17b	8.71014e-05	0.335049	0.616	0.557	0.69202
Fam49a	8.87827e-05	-0.343353	0.477	0.532	0.705379
AW112010	9.12111e-05	0.456016	0.198	0.14	0.724672
Cyp2d26	9.34249e-05	1.26764	0.056	0.025	0.742261
Dad1	9.49581e-05	1.31114	0.061	0.029	0.754442
Arhgap10	9.6257e-05	0.659791	0.221	0.162	0.764762
Gtf2a2	0.000104154	0.539703	0.164	0.11	0.827503
Atxn10	0.000104423	-0.814549	0.092	0.143	0.829644
Atp13a1	0.000106322	-0.702763	0.075	0.124	0.844726
Dennd2a	0.00010643	0.734086	0.106	0.063	0.845585
Pik3cb	0.000109542	-0.487799	0.215	0.281	0.870309
Stimate	0.000110794	-0.875492	0.041	0.08	0.880258
Gm15738	0.000113433	1.10047	0.063	0.03	0.901229
Gm10069	0.000113549	1.61267	0.029	0.008	0.902149
Tmcc1	0.000116984	-0.173571	0.804	0.841	0.929441
Madd	0.000118433	0.29317	0.578	0.518	0.940948
Slc16a10	0.000122884	-0.39409	0.423	0.48	0.976313
Cox5a	0.000124816	0.669056	0.12	0.075	0.991667
Epsti1	0.00012648	-0.221139	0.726	0.765	1
Cyp2f2	0.000127518	0.944151	0.075	0.039	1
Pbx1	0.000129927	-0.478859	0.175	0.241	1
Pon1	0.000130252	1.55609	0.035	0.012	1
Med12l	0.000132046	0.720769	0.15	0.101	1
mt-Cytb	0.000133803	0.410863	0.279	0.212	1
Fto	0.00013428	-0.322506	0.336	0.413	1
Cd86	0.000136547	0.293456	0.598	0.52	1
Fryl	0.000136866	-0.391384	0.277	0.344	1
Psmd12	0.000138291	0.857253	0.09	0.051	1
Tcf7l2	0.000140971	-0.142269	0.929	0.94	1
Rel	0.000141545	0.483293	0.272	0.21	1
Srp9	0.000142262	1.23213	0.06	0.029	1
Ppp2r3d	0.000145321	-0.976786	0.044	0.083	1
Dock2	0.000145338	-0.196729	0.78	0.815	1
Nol7	0.000145482	1.08914	0.054	0.025	1
Nkain2	0.000149185	-1.76871	0.008	0.03	1
Entpd1	0.000149188	0.272937	0.755	0.722	1
Fbxl2	0.000153764	1.09094	0.066	0.033	1
Mndal	0.000155827	0.238571	0.731	0.675	1
Ccdc152	0.000156983	1.01422	0.06	0.029	1
Tgm2	0.000164466	-0.606595	0.133	0.192	1
Fam160b2	0.000165017	-1.06396	0.039	0.075	1
Dip2b	0.000166958	-0.240023	0.528	0.604	1
mt-Co1	0.000169272	0.259908	0.652	0.587	1
Fcer1g	0.000172276	0.350644	0.34	0.269	1
Gstt1	0.000173138	1.84444	0.02	0.004	1
Arid1a	0.000178352	-0.3299	0.396	0.465	1
Akap13	0.00017846	-0.322797	0.38	0.439	1
0610043K17Rik	0.000179041	0.92646	0.072	0.038	1
Slc1a2	0.000179883	0.848664	0.099	0.059	1
Baz1a	0.00018226	-0.366907	0.325	0.396	1
Rpl36al	0.000185077	0.715981	0.124	0.08	1
Rnpep	0.000187917	-0.431572	0.249	0.313	1
Hdac9	0.000188528	-0.116331	0.933	0.942	1
Ptbp3	0.000189669	0.243294	0.626	0.566	1
Spcs2	0.000190494	0.727436	0.108	0.065	1
Sgpp1	0.000190847	0.748597	0.112	0.069	1
Aldh1a1	0.000191918	0.855574	0.087	0.049	1
Vtn	0.000192252	0.865886	0.098	0.058	1
Rrbp1	0.000198004	-0.258728	0.516	0.574	1
Ifngr1	0.000200914	0.363437	0.401	0.338	1
Cd36	0.000201834	0.783102	0.135	0.089	1
Plxna4	0.000205873	-0.55436	0.184	0.244	1
Gpatch2	0.000207934	-0.437877	0.258	0.321	1
Baiap2	0.000215535	-1.37663	0.019	0.047	1
Cyp2a12	0.000216693	1.49227	0.034	0.012	1
Cox4i1	0.000217181	0.759773	0.112	0.07	1
Ehmt2	0.000221603	-0.671043	0.122	0.176	1
Ndufb9	0.000224062	1.23169	0.06	0.03	1
Mug2	0.000229251	0.874808	0.049	0.022	1
Oat	0.000230086	0.904772	0.073	0.039	1
Prkg1	0.000236563	-0.62878	0.02	0.049	1
Phyh	0.000239299	0.652347	0.163	0.113	1
Ncoa2	0.000240098	-0.312857	0.532	0.582	1
Rpl32	0.000240805	0.605656	0.117	0.073	1
Fli1	0.000241543	-0.241234	0.624	0.667	1
Rpl27a	0.000245846	0.519798	0.196	0.141	1
Prkcq	0.000248316	-0.748682	0.083	0.13	1
Srrt	0.000249063	-0.68817	0.085	0.132	1
Alg13	0.00026096	-0.756784	0.066	0.108	1
Naca	0.000262759	0.706074	0.088	0.051	1
Cyp4a12a	0.000263721	1.44503	0.03	0.01	1
Rif1	0.000271091	-0.566099	0.124	0.177	1
Pdgfc	0.00027555	0.2634	0.479	0.412	1
Gm43713	0.000279453	0.877191	0.081	0.046	1
Nudt4	0.000279759	0.816322	0.055	0.026	1
Mup21	0.000283155	1.14983	0.049	0.023	1
Lrrc45	0.000291307	-0.93054	0.049	0.087	1
Myo10	0.000292586	0.351148	0.348	0.282	1
Camk2d	0.000296384	-0.228536	0.717	0.747	1
Tcim	0.000303117	1.2385	0.061	0.031	1
Sdcbp	0.000305423	0.300183	0.355	0.292	1
B3galt1	0.000307302	-1.00292	0.023	0.052	1
Slco1b2	0.0003093	0.55935	0.156	0.107	1
Apof	0.000312536	0.858587	0.044	0.019	1
Aadac	0.000317679	0.988908	0.047	0.021	1
Cyp26b1	0.000321547	-2.97069	0.003	0.019	1
Cpeb3	0.000325195	-0.400083	0.257	0.319	1
Dnajc19	0.000328876	0.787621	0.127	0.084	1
Cln3	0.000330608	-0.433762	0.203	0.265	1
Slc10a1	0.000333288	0.993368	0.049	0.023	1
Bmp1	0.000336524	-3.30494	0.002	0.017	1
Slc25a37	0.00033971	-0.873592	0.055	0.094	1
Cyp2c23	0.000340156	1.69687	0.027	0.008	1
Hsp90b1	0.00034195	0.267285	0.472	0.404	1
Ntm	0.000344519	-1.10975	0.013	0.037	1
Cox7a2	0.000351809	0.93648	0.068	0.037	1
Cyb5a	0.000357426	0.517927	0.164	0.113	1
Pgk1	0.000357565	1.04746	0.057	0.028	1
Acsf2	0.000360297	-0.655903	0.074	0.118	1
B230219D22Rik	0.00036241	0.582955	0.142	0.096	1
Rsrp1	0.000364141	0.165206	0.874	0.82	1
Map3k12	0.000369233	1.62421	0.034	0.013	1
Leng8	0.000387441	-0.45784	0.231	0.293	1
1700085D07Rik	0.000390421	1.31623	0.044	0.02	1
Tsku	0.000394174	-1.23996	0.021	0.049	1
Zhx2	0.000410825	-0.673634	0.124	0.175	1
Gm47167	0.000410944	0.862074	0.092	0.055	1
1500004A13Rik	0.000411925	0.830601	0.09	0.054	1
Rps2	0.000424703	0.535901	0.168	0.118	1
Mcl1	0.000430462	0.303178	0.407	0.342	1
Mpp5	0.000436445	0.634228	0.15	0.105	1
Snx25	0.000438835	-0.340825	0.321	0.385	1
Gm15622	0.000440899	6.64182	0.009	0	1
Gm17178	0.000444083	1.2944	0.029	0.01	1
Tbc1d4	0.000445885	-0.614081	0.126	0.176	1
Ndufa6	0.000445935	1.33716	0.056	0.028	1
Dalrd3	0.00044617	-0.860407	0.056	0.094	1
Sgk1	0.000447733	0.397004	0.234	0.177	1
Rpl34	0.000447749	0.738191	0.128	0.085	1
Crppa	0.000451545	-0.618703	0.142	0.192	1
Zswim6	0.000452196	-0.186722	0.838	0.847	1
Rreb1	0.000455836	0.147124	0.844	0.818	1
Arhgap42	0.000455985	-0.650267	0.059	0.099	1
Acer3	0.000460364	0.173328	0.793	0.736	1
Hnrnph2	0.000471075	-0.669782	0.058	0.097	1
Kmt2a	0.000477401	-0.462726	0.23	0.286	1
Dazap1	0.000487871	-0.600817	0.147	0.199	1
Rps24	0.000489128	0.492994	0.189	0.136	1
Mlxipl	0.000492338	-1.4162	0.018	0.044	1
Vasp	0.000497314	-0.501485	0.134	0.187	1
Sult1a1	0.000497681	0.653172	0.123	0.081	1
Ciz1	0.000500494	-0.854751	0.054	0.092	1
Gm14798	0.000503812	0.937607	0.068	0.037	1
Atp5g1	0.000504478	0.995204	0.05	0.024	1
Purg	0.00050834	-0.706084	0.087	0.131	1
Galnt10	0.000510198	0.401443	0.241	0.183	1
Ptprg	0.000523763	-1.60939	0.01	0.03	1
Gm26740	0.000525808	-0.216005	0.626	0.67	1
Actb	0.000537092	0.267763	0.478	0.41	1
Plekha2	0.000543561	-0.456309	0.192	0.249	1
Fau	0.000555165	0.437932	0.224	0.17	1
Lamp2	0.000560431	0.228784	0.579	0.512	1
Lamp1	0.000584356	0.379987	0.316	0.257	1
Hsd3b5	0.000589982	2.23142	0.018	0.004	1
Trim30d	0.000591011	-0.391056	0.246	0.306	1
Pcm1	0.00059657	0.321271	0.414	0.354	1
Rpl18	0.000603476	0.732379	0.092	0.056	1
Ndufa13	0.00060921	0.886209	0.075	0.043	1
Psma3	0.000616763	0.414975	0.276	0.218	1
Sipa1l1	0.000627774	-0.285614	0.342	0.405	1
Sft2d1	0.000633156	0.357235	0.172	0.121	1
Sp140	0.000637336	-0.549215	0.093	0.139	1
Stxbp2	0.000637428	-0.657104	0.104	0.15	1
Gda	0.00064066	-1.26774	0.018	0.043	1
Srgn	0.000640685	0.765219	0.092	0.056	1
Gm17133	0.000643783	-1.71768	0.009	0.028	1
Ppp1r9a	0.000645236	-0.235542	0.536	0.6	1
Ppp3ca	0.000646544	-0.200916	0.767	0.782	1
Rab4b	0.000648584	0.751956	0.087	0.052	1
Upb1	0.00065319	0.997595	0.032	0.012	1
Ces1e	0.000653444	1.53173	0.027	0.009	1
Dock4	0.000665211	-0.157509	0.913	0.939	1
Stard7	0.000675244	-0.549419	0.091	0.135	1
Cux1	0.000675707	-0.335805	0.349	0.407	1
Dram2	0.000678139	0.250256	0.607	0.544	1
Cpb2	0.000680522	1.24386	0.034	0.013	1
Ifi204	0.000688395	0.264996	0.511	0.456	1
4930444A19Rik	0.000702031	0.581181	0.136	0.093	1
Cebpd	0.000709064	1.03806	0.048	0.023	1
Kidins220	0.000717349	-0.302296	0.437	0.495	1
4930557K07Rik	0.000718845	0.610643	0.122	0.082	1
Ivns1abp	0.000723805	-0.291832	0.266	0.33	1
Vmp1	0.000725338	-0.257997	0.458	0.517	1
Nrxn1	0.000725656	-0.360259	0.022	0.049	1
Stx4a	0.000728068	-0.395419	0.169	0.227	1
Arel1	0.000746973	-0.651412	0.092	0.137	1
4930484I04Rik	0.000753252	1.02918	0.05	0.025	1
Usp25	0.000755868	-0.307527	0.438	0.495	1
Gm35188	0.00075722	0.592639	0.162	0.117	1
Tspan31	0.000769967	-1.28675	0.023	0.049	1
Akap10	0.000796656	0.252439	0.516	0.455	1
Evl	0.000800313	-0.315264	0.372	0.432	1
Tmtc1	0.000800414	-0.536943	0.189	0.242	1
Ptma	0.000801278	0.474897	0.183	0.135	1
Tfec	0.000801454	0.289155	0.555	0.509	1
Skil	0.000805937	-0.408478	0.339	0.391	1
Itih2	0.000806864	1.47626	0.039	0.017	1
Rap1gds1	0.000813125	-0.200262	0.657	0.701	1
Casc3	0.000830054	0.50273	0.224	0.173	1
Lrrc4	0.000835142	0.446125	0.246	0.193	1
Rhbdf2	0.000845607	-0.514798	0.096	0.142	1
Mettl23	0.000851401	0.672276	0.101	0.064	1
Mrps14	0.000858017	1.15954	0.029	0.011	1
Cisd1	0.000858854	1.29632	0.039	0.018	1
Atrnl1	0.000874269	0.348756	0.407	0.343	1
Kdm6a	0.000895916	-0.379034	0.266	0.325	1
Abca1	0.000913501	-0.20747	0.747	0.765	1
Pdzd2	0.000924279	5.92091	0.008	0	1
Rpl13	0.000925	0.45143	0.193	0.143	1
Pdia6	0.000938964	0.407223	0.144	0.099	1
Ncoa1	0.000944642	-0.257453	0.592	0.639	1
Ptpn4	0.000958723	-0.711304	0.037	0.068	1
Traf7	0.00097416	-0.739651	0.048	0.082	1
N4bp1	0.000983571	-0.642959	0.082	0.123	1
Ppp1r13b	0.000989951	-0.477665	0.151	0.202	1
Tom1	0.00100941	-0.451359	0.136	0.187	1
Abl2	0.00101051	-0.231665	0.379	0.447	1
Rmdn1	0.00101487	0.354681	0.224	0.17	1
Immt	0.00103113	-0.421278	0.146	0.199	1
Rbm8a	0.00103162	0.936093	0.041	0.019	1
M6pr	0.00103447	0.659479	0.092	0.057	1
Tecpr2	0.00105249	-0.4673	0.189	0.242	1
Rps12	0.00105666	0.416235	0.171	0.123	1
Dynll2	0.00106312	0.959249	0.044	0.021	1
Adar	0.00106358	-0.465059	0.118	0.165	1
Sult5a1	0.00106578	-3.35107	0.001	0.013	1
Ccdc66	0.00106718	0.756918	0.097	0.062	1
Heg1	0.00108537	-0.342181	0.284	0.343	1
Gm31763	0.00109295	0.966294	0.049	0.025	1
Ubxn2a	0.00109872	0.938354	0.05	0.025	1
Atf4	0.00110324	0.786751	0.086	0.053	1
Grk2	0.00110558	-0.374092	0.272	0.325	1
Krt18	0.00111534	1.85351	0.021	0.006	1
Ubr4	0.00112539	-0.416855	0.201	0.254	1
Eif3b	0.00113644	-0.829374	0.054	0.089	1
AU020206	0.00113746	-0.386475	0.124	0.173	1
Fmo1	0.00114107	2.47113	0.014	0.003	1
Asgr1	0.00114342	0.865314	0.048	0.024	1
Pxdc1	0.0011547	0.63824	0.066	0.037	1
Nbas	0.0011635	-0.351368	0.202	0.258	1
Mycbp2	0.00117791	-0.15393	0.809	0.822	1
Susd6	0.00118411	-0.246591	0.585	0.637	1
Ncam2	0.00123202	-2.79553	0.004	0.018	1
Unc93b1	0.00123446	-0.15085	0.726	0.763	1
Stub1	0.00127768	-0.551297	0.101	0.145	1
Tpp2	0.0012867	0.22639	0.595	0.537	1
Clasp1	0.0012872	-0.445927	0.198	0.25	1
AC149090.1	0.00130732	-0.163033	0.774	0.811	1
Sfi1	0.00132259	-0.489192	0.139	0.187	1
Hpx	0.00132422	0.502644	0.163	0.12	1
Gm4841	0.00132791	1.12226	0.036	0.015	1
Rpl29	0.00133607	0.849265	0.066	0.037	1
Nr3c2	0.00134013	-0.505791	0.144	0.192	1
Bclaf1	0.00136126	0.270368	0.457	0.394	1
Smarca2	0.00136293	-0.454822	0.161	0.211	1
Spred1	0.00137217	0.216106	0.489	0.425	1
Mb21d2	0.00137221	-1.25387	0.023	0.048	1
Ugt2b36	0.00138056	0.62524	0.076	0.045	1
Nedd4l	0.00138615	0.225695	0.435	0.374	1
Slc12a2	0.00139266	0.448801	0.179	0.132	1
Taok3	0.00140086	-0.29612	0.287	0.343	1
Mocos	0.00142704	-1.49189	0.016	0.038	1
Rabac1	0.00143642	0.893385	0.061	0.034	1
Nrip1	0.00146417	-0.259504	0.472	0.546	1
Atf7ip	0.00146675	-0.274695	0.403	0.461	1
4930414N06Rik	0.0014732	1.0305	0.039	0.018	1
Rpl7	0.00147337	0.62592	0.097	0.063	1
Ubl5	0.00148765	1.04169	0.055	0.03	1
Ksr2	0.00149365	-0.185172	0.538	0.602	1
Upf2	0.00149689	-0.317223	0.234	0.293	1
Cables1	0.00152136	0.936585	0.072	0.043	1
Mthfr	0.00152633	-0.76911	0.075	0.112	1
Pip4p1	0.00153929	0.451361	0.187	0.14	1
Rnf217	0.00153978	-1.30104	0.013	0.034	1
Twf1	0.0015648	0.585683	0.116	0.078	1
Comt	0.00157979	0.392502	0.281	0.227	1
Slc15a2	0.00159572	-1.00257	0.033	0.061	1
H2-Q7	0.00159916	-0.657282	0.058	0.093	1
Rdh7	0.00160339	0.558668	0.09	0.056	1
Itpk1	0.00160713	-0.47142	0.174	0.225	1
2001-03-01	0.00161031	0.816093	0.044	0.022	1
Rnf125	0.00161241	1.86977	0.024	0.008	1
Ankrd11	0.0016184	-0.215917	0.589	0.637	1
F13b	0.00163122	1.87654	0.019	0.006	1
Suclg2	0.00165247	-0.410543	0.165	0.215	1
Nr1h4	0.00167463	-1.09358	0.025	0.05	1
Prdx2	0.00167571	0.808665	0.05	0.026	1
Acvr2a	0.00167654	0.321564	0.24	0.187	1
Ptk2b	0.00168337	-0.3483	0.41	0.458	1
Ppp2ca	0.00168392	-0.418836	0.157	0.206	1
P2rx4	0.00169081	0.31072	0.362	0.311	1
Armt1	0.00169841	-1.30487	0.022	0.046	1
Slc25a5	0.00171318	0.92259	0.066	0.039	1
1700037C18Rik	0.0017184	0.756586	0.09	0.057	1
Luc7l3	0.00173821	-0.297239	0.404	0.456	1
Ist1	0.00176021	-0.439713	0.104	0.148	1
Ddx39b	0.00176302	-0.350695	0.206	0.261	1
Sltm	0.00179465	-0.291139	0.332	0.382	1
Camta1	0.00181455	-0.521649	0.158	0.205	1
Efna5	0.00182494	-2.25172	0.004	0.018	1
Hsd17b2	0.00183623	1.55425	0.025	0.009	1
Nlk	0.00186449	-0.341501	0.244	0.3	1
Gm34408	0.00187087	0.696927	0.128	0.091	1
Igfbp2	0.00188312	1.28015	0.025	0.009	1
Rgs16	0.00189339	3.92051	0.011	0.001	1
Ikzf1	0.00190359	-0.210558	0.568	0.604	1
Plac8	0.00190765	-0.506394	0.074	0.112	1
Prpf18	0.00192078	0.446083	0.117	0.079	1
Jund	0.0019225	0.662538	0.081	0.05	1
Apol7a	0.00192293	3.06187	0.011	0.001	1
Gm31224	0.00192734	0.935952	0.078	0.049	1
Ocrl	0.00194613	-0.444129	0.209	0.257	1
Fam120a	0.00196051	-0.334522	0.337	0.395	1
Klf9	0.0019633	0.387015	0.171	0.126	1
Trerf1	0.00198079	0.595247	0.131	0.092	1
Pkm	0.00198122	-0.492877	0.092	0.134	1
5430405H02Rik	0.00200114	-0.712475	0.053	0.086	1
Gulp1	0.00200173	-5.88438	0	0.009	1
Gm26724	0.0020125	0.89007	0.062	0.035	1
E130102H24Rik	0.00204249	0.695865	0.126	0.089	1
Stab2	0.0020447	-0.276311	0.388	0.447	1
Fam168b	0.00208566	0.346892	0.185	0.139	1
Cdh13	0.00208898	-2.63332	0.003	0.015	1
Stat6	0.00209153	-0.5411	0.155	0.201	1
Abi1	0.00211285	-0.203542	0.672	0.702	1
Glyr1	0.00212326	-0.465165	0.137	0.182	1
Celf2	0.00213208	-0.14072	0.768	0.807	1
Psme1	0.00216052	-0.685232	0.072	0.108	1
Gatad2a	0.00216739	-0.35724	0.198	0.249	1
Osbpl11	0.00218391	0.310474	0.277	0.227	1
Ndufb8	0.00219658	1.08687	0.046	0.024	1
Hipk2	0.00220005	-0.278965	0.381	0.438	1
Samd9l	0.00223319	0.18445	0.343	0.279	1
Bgn	0.00226158	1.58984	0.021	0.007	1
Dock8	0.00226766	0.165982	0.777	0.745	1
Tnrc6a	0.00227026	-0.311874	0.393	0.451	1
Sumo1	0.00229501	0.350935	0.197	0.15	1
Arhgap12	0.0023136	0.168578	0.586	0.527	1
Diaph1	0.00231384	-0.345601	0.218	0.27	1
Spop	0.00231575	-0.23368	0.505	0.551	1
Zfp664	0.0023193	-0.925009	0.024	0.048	1
Fam3c	0.00232806	-0.560616	0.067	0.103	1
Rptor	0.00233312	-0.368338	0.228	0.282	1
Phactr1	0.00233856	-0.424713	0.161	0.208	1
Tiam2	0.00236162	2.36773	0.017	0.005	1
Nmt2	0.00236357	-0.490638	0.09	0.13	1
Cdyl2	0.00236425	-0.456744	0.126	0.171	1
Kdm7a	0.00237738	0.294321	0.399	0.348	1
Pde4dip	0.00239257	0.551495	0.124	0.087	1
Colgalt1	0.00242759	0.385309	0.29	0.24	1
Atp5h	0.00244017	0.93706	0.085	0.055	1
4930511M06Rik	0.00245456	-0.96004	0.022	0.045	1
4930512B01Rik	0.00246005	1.33172	0.029	0.012	1
Wdr45b	0.00246953	-0.572825	0.075	0.112	1
Cfhr2	0.00250225	0.552106	0.1	0.066	1
Ndufs2	0.0025191	0.688527	0.071	0.043	1
Sh3glb2	0.00252403	-0.819472	0.029	0.054	1
Trp53inp2	0.00252903	0.76706	0.049	0.026	1
Pcbd1	0.00254169	1.36142	0.022	0.008	1
Fubp1	0.00258221	0.367148	0.355	0.306	1
Tshz3	0.00263822	-0.600111	0.068	0.104	1
Ptcd3	0.00271366	-0.62182	0.079	0.115	1
Sord	0.0027315	0.710384	0.095	0.063	1
Hnrnpk	0.00275029	0.345305	0.296	0.246	1
Hspa8	0.00278886	0.363869	0.242	0.193	1
Rpl6	0.00280394	0.495621	0.171	0.13	1
Top1	0.00285768	0.212212	0.527	0.463	1
Prpf4b	0.00286198	0.281891	0.418	0.364	1
Rbms3	0.00286928	-0.880337	0.017	0.038	1
Ccr5	0.00288698	0.328525	0.405	0.362	1
Rplp2	0.00289886	0.58015	0.104	0.07	1
Rps6	0.00290634	0.452749	0.126	0.089	1
Ugt3a1	0.00295878	1.30199	0.014	0.004	1
Rplp1	0.00296754	0.322092	0.236	0.188	1
Lnpep	0.00298199	-0.160818	0.697	0.726	1
Selenok	0.00299262	0.750518	0.061	0.035	1
Mrc1	0.00301563	0.155556	0.911	0.892	1
Nr2c2ap	0.00307521	1.14827	0.043	0.023	1
Mettl7b	0.00308495	1.08231	0.048	0.026	1
Gsr	0.00308984	-0.307975	0.32	0.371	1
Atp5j	0.00314425	0.845926	0.055	0.031	1
Ctcflos	0.00314629	-1.52337	0.005	0.018	1
Cyp2c67	0.00315225	0.914336	0.033	0.015	1
Slc12a9	0.00315935	-0.971439	0.047	0.076	1
Ate1	0.00316327	0.694348	0.092	0.061	1
Cxcl12	0.0031765	1.07246	0.038	0.018	1
Gpr108	0.00318502	-0.815845	0.048	0.077	1
Ebp	0.00318562	1.24881	0.042	0.022	1
Frmd8	0.00318925	0.887574	0.05	0.027	1
St7	0.00322839	-0.298555	0.2	0.253	1
Vapa	0.0032367	-0.33132	0.265	0.32	1
Lrp6	0.00324289	0.193711	0.477	0.415	1
Hrg	0.00326146	1.13186	0.041	0.021	1
Nabp1	0.00326358	-0.423772	0.12	0.163	1
Rps11	0.00326511	0.596298	0.125	0.089	1
Pdia3	0.00328901	0.338427	0.274	0.225	1
Snd1	0.0032998	-0.206389	0.503	0.555	1
Stk4	0.00331004	-0.349749	0.2	0.25	1
Pde1c	0.00333373	0.61293	0.086	0.056	1
Uba6	0.00333503	0.604055	0.145	0.108	1
Bmp6	0.00333968	-1.18941	0.02	0.042	1
Chordc1	0.00337772	0.435424	0.178	0.136	1
Zfp322a	0.00338523	0.511831	0.104	0.07	1
Filip1l	0.00339327	0.148949	0.615	0.563	1
Gm15675	0.00341944	0.843159	0.071	0.044	1
Gjb1	0.00345019	0.944256	0.039	0.019	1
Ubash3b	0.00353832	0.281373	0.344	0.289	1
Sars	0.00353919	-0.730436	0.03	0.054	1
Foxj2	0.00354071	-0.607498	0.065	0.098	1
Fam214b	0.00354215	-0.716054	0.068	0.101	1
Sdc1	0.00357612	2.23913	0.015	0.004	1
Hnrnpa3	0.00358827	0.333795	0.449	0.408	1
Vps33a	0.00360664	0.719165	0.112	0.079	1
Ifitm2	0.00362212	0.43613	0.116	0.08	1
Itgb5	0.00363311	0.161117	0.474	0.415	1
C4bp	0.00363765	0.626976	0.05	0.027	1
Fcgr2b	0.00368611	1.0253	0.027	0.011	1
Mprip	0.00369662	-0.387795	0.147	0.192	1
Lhpp	0.00371812	-0.973988	0.033	0.058	1
Rpl7a	0.003736	0.648358	0.075	0.047	1
mt-Nd5	0.00375871	0.670947	0.09	0.059	1
Gm4070	0.00377171	-0.455865	0.139	0.182	1
Dmxl2	0.00378534	0.578585	0.101	0.068	1
Cmss1	0.00379598	-0.254924	0.581	0.618	1
Errfi1	0.00379869	0.394429	0.22	0.174	1
Dock10	0.00380919	-0.130133	0.815	0.84	1
Spats2l	0.00381113	1.31592	0.02	0.007	1
Gm4756	0.00383562	0.584175	0.026	0.011	1
Btf3	0.00386612	0.81697	0.068	0.042	1
Abr	0.00386635	-0.212761	0.689	0.723	1
Plekhm1	0.00387711	-0.388252	0.214	0.261	1
Csf1	0.00389394	2.49235	0.01	0.001	1
Gm28198	0.00390366	0.692434	0.065	0.039	1
Cd2ap	0.00394471	-0.249496	0.519	0.561	1
Cebpa	0.00394475	0.647885	0.092	0.062	1
Igfbp1	0.00395477	1.2915	0.028	0.012	1
Ppp2r5e	0.00395561	-0.293438	0.273	0.327	1
Ptp4a2	0.00396801	-0.217539	0.494	0.544	1
Mdm2	0.00402742	-0.311205	0.175	0.225	1
Smarcad1	0.00404048	-0.497322	0.155	0.197	1
Dst	0.00408611	0.194147	0.518	0.453	1
Nod1	0.00411317	-0.294515	0.29	0.343	1
4930544F09Rik	0.00413654	5.43936	0.006	0	1
Xylb	0.00415306	-1.54191	0.017	0.037	1
Slc24a5	0.00416039	1.46144	0.031	0.014	1
Ddx60	0.00416544	-0.218541	0.67	0.687	1
Kdm1a	0.00418877	0.442143	0.169	0.127	1
Spryd7	0.00419851	0.900416	0.055	0.032	1
Adam9	0.00420705	0.330354	0.204	0.159	1
Rnf157	0.00421265	0.551205	0.118	0.085	1
Arglu1	0.00423781	-0.293885	0.369	0.418	1
Pi4kb	0.00425141	-0.503894	0.099	0.137	1
Sult1d1	0.00426299	1.22658	0.021	0.008	1
Sem1	0.00426648	0.324624	0.17	0.127	1
Erap1	0.00427325	-0.436671	0.116	0.156	1
Napa	0.00428557	-0.627335	0.079	0.113	1
Josd2	0.00429286	-1.09723	0.025	0.047	1
Gckr	0.00430062	-1.60656	0.009	0.024	1
Cyp1a2	0.00430193	1.2223	0.021	0.008	1
Tle4	0.00432183	-0.21683	0.618	0.646	1
Dtnb	0.00432189	-0.66763	0.076	0.11	1
Sdc4	0.00432432	0.726507	0.068	0.042	1
Tbc1d13	0.00434883	-0.676388	0.086	0.12	1
Strbp	0.00436023	0.440858	0.182	0.14	1
Sox5	0.00436812	-0.749635	0.026	0.049	1
Nlrp6	0.00438809	-2.54064	0.003	0.014	1
Oasl2	0.00441991	-0.526938	0.127	0.169	1
Cacnb2	0.00444072	-2.27615	0.003	0.014	1
Pced1b	0.0044422	-0.276202	0.219	0.272	1
Rpl27	0.00445361	0.801865	0.073	0.046	1
Dgka	0.00446464	0.787056	0.051	0.029	1
Ddx5	0.00446488	-0.112028	0.916	0.908	1
Pemt	0.00446894	1.19024	0.033	0.015	1
Pomp	0.00447539	0.660157	0.077	0.049	1
Fbn1	0.00449486	-5.38982	0	0.008	1
Gm19522	0.00450071	0.510875	0.088	0.058	1
Arpc5	0.00450095	-0.504032	0.154	0.197	1
Ncln	0.00453558	-0.756557	0.038	0.063	1
Cdh5	0.00456882	0.28584	0.384	0.338	1
B3galt2	0.0045858	1.26653	0.033	0.015	1
Cmtm8	0.00460183	-1.40212	0.011	0.027	1
Pde8a	0.00464365	-0.215096	0.462	0.505	1
Znfx1	0.00467806	-0.443993	0.195	0.239	1
Sh3bgrl2	0.00469157	0.464417	0.156	0.117	1
Eml5	0.00472238	1.16147	0.035	0.017	1
Atp5b	0.00475505	0.535735	0.113	0.08	1
Rassf1	0.00479401	0.482791	0.119	0.085	1
Selenos	0.00480112	0.74689	0.063	0.038	1
Pigb	0.0048176	0.910041	0.046	0.025	1
Ptcd2	0.00489199	-0.691646	0.076	0.109	1
Becn1	0.00489437	-0.448423	0.09	0.127	1
Gm48765	0.00490205	0.667041	0.082	0.054	1
Phykpl	0.00491294	0.673776	0.071	0.045	1
Grsf1	0.00491482	1.12747	0.054	0.032	1
Slc38a3	0.00494533	0.861443	0.046	0.025	1
Gm15764	0.00495013	0.899497	0.058	0.035	1
Pitpna	0.00501385	0.252763	0.441	0.397	1
Ankrd16	0.00503765	0.477835	0.114	0.08	1
Rnpepl1	0.00504642	-0.817364	0.066	0.096	1
Tns3	0.00506169	-0.343589	0.245	0.293	1
Bag1	0.00507308	-0.980402	0.031	0.054	1
Wasf2	0.00510284	0.16336	0.707	0.654	1
Gm50013	0.00511645	0.90875	0.039	0.02	1
Sparc	0.00512347	1.40075	0.024	0.01	1
Atp1b1	0.0051269	1.6393	0.017	0.006	1
Pparg	0.00513827	0.311926	0.208	0.163	1
Hdac8	0.00515231	-0.341327	0.229	0.279	1
Pot1b	0.0051524	-0.303215	0.343	0.389	1
Nsf	0.00515951	0.206736	0.294	0.239	1
Mfsd4a	0.00517459	0.7496	0.068	0.043	1
Tbl1x	0.00517961	-0.271701	0.331	0.385	1
Vps9d1	0.00519435	0.649326	0.073	0.046	1
Mctp2	0.00522585	-1.7689	0.007	0.02	1
Adk	0.00525838	-0.211691	0.25	0.299	1
Gapvd1	0.00535025	0.162872	0.604	0.554	1
Ctss	0.00535339	0.214229	0.513	0.466	1
Pcyt2	0.00536142	-0.641865	0.069	0.101	1
Mrpl52	0.00538422	0.746997	0.059	0.035	1
Rasgrp2	0.00538474	-0.299583	0.247	0.297	1
Il13ra1	0.00541006	0.291901	0.166	0.125	1
Ing4	0.00541366	0.364491	0.134	0.098	1
Canx	0.00543883	0.265194	0.382	0.334	1
Ccny	0.00545463	0.266904	0.403	0.354	1
Mfsd11	0.00546103	0.425862	0.161	0.123	1
Tmed9	0.00548271	0.761634	0.064	0.039	1
Tra2a	0.00554566	-0.239164	0.474	0.52	1
Smim14	0.0055846	0.3901	0.189	0.149	1
1600010M07Rik	0.00558779	0.526526	0.136	0.101	1
Dlgap1	0.00558866	-1.64034	0.008	0.022	1
Zfhx3	0.00559763	0.178638	0.566	0.515	1
Psap	0.00559989	-0.235954	0.571	0.615	1
Srsf3	0.00559997	0.287517	0.266	0.217	1
Peli1	0.00560081	-0.198931	0.587	0.634	1
Rnf2	0.005606	0.502391	0.116	0.082	1
Ptprb	0.00567642	-1.06678	0.028	0.05	1
Cwc22	0.00569601	-0.785833	0.067	0.098	1
Acap2	0.00574378	-0.225191	0.485	0.532	1
Mat2a	0.00574506	0.221196	0.319	0.269	1
Hnrnpa0	0.00574887	0.801786	0.064	0.039	1
Pzp	0.00576271	0.441315	0.143	0.106	1
Hs6st1	0.00579902	-0.293706	0.21	0.258	1
Sucnr1	0.00582127	2.16795	0.011	0.002	1
Dnaja3	0.00587193	0.399442	0.118	0.085	1
Grb2	0.00590499	-0.181197	0.59	0.635	1
Lsm14a	0.00592031	-0.380951	0.17	0.214	1
Usp39	0.0059445	-0.844041	0.025	0.046	1
Trp53inp1	0.00599331	0.532332	0.086	0.057	1
Btbd11	0.00603343	-0.276112	0.588	0.606	1
Gm20732	0.00610295	-0.273623	0.308	0.358	1
Herc6	0.00610905	-0.221421	0.305	0.359	1
Fam219a	0.00612577	0.258511	0.298	0.249	1
Erc2	0.00614117	-1.88031	0.005	0.017	1
Zzef1	0.00615938	-0.303451	0.225	0.274	1
Gm49980	0.0061679	-1.21645	0.026	0.047	1
Ankzf1	0.00617242	-0.831634	0.039	0.063	1
Rasa1	0.00620302	0.28087	0.513	0.468	1
Ppox	0.00621853	-0.823066	0.039	0.063	1
Ube2n	0.00625693	0.396436	0.236	0.194	1
Pah	0.00630325	0.689712	0.066	0.041	1
Tmem33	0.00637166	0.697142	0.086	0.058	1
Myo1c	0.00638229	-0.657669	0.049	0.077	1
C330002G04Rik	0.00638518	1.27745	0.019	0.007	1
Igfbp7	0.00640141	1.2677	0.03	0.014	1
4930599N23Rik	0.00643858	0.353792	0.174	0.134	1
Zcchc24	0.00652396	-0.436179	0.094	0.13	1
Pfdn5	0.00653824	0.536126	0.073	0.047	1
Vkorc1	0.00653832	1.20081	0.03	0.014	1
Golga7	0.00656193	0.632214	0.084	0.056	1
Tmem51	0.00656583	-0.278254	0.28	0.331	1
Xbp1	0.00656795	0.466393	0.155	0.119	1
Jun	0.00657296	0.903578	0.047	0.027	1
Bphl	0.00657419	1.29796	0.033	0.016	1
Snhg20	0.0065753	0.411809	0.193	0.152	1
Ak2	0.0065973	0.582181	0.11	0.078	1
Glul	0.00662606	0.283673	0.195	0.151	1
Isca2	0.00666862	1.20322	0.039	0.02	1
Slc44a2	0.0066705	-0.424493	0.1	0.139	1
Elovl3	0.00669692	0.581968	0.067	0.042	1
Esrrg	0.00676142	-5.75908	0	0.007	1
Mecom	0.00676142	-5.52746	0	0.007	1
Vegfc	0.00676142	-5.57583	0	0.007	1
Tmx1	0.00677427	0.455489	0.139	0.104	1
Micu1	0.00678611	0.359156	0.213	0.171	1
Gm28501	0.00682095	0.785651	0.06	0.037	1
Lrp1	0.00682827	-0.147019	0.726	0.742	1
Man1a	0.00682909	-0.439603	0.181	0.223	1
Arl4a	0.00683664	1.13324	0.035	0.018	1
Ppargc1b	0.00684926	-0.344722	0.158	0.2	1
Col5a3	0.00686477	-1.61503	0.006	0.018	1
Gm32250	0.00687452	0.628416	0.084	0.056	1
Steap4	0.00688295	1.57262	0.02	0.008	1
Smurf2	0.00691419	0.219642	0.486	0.439	1
Gm26759	0.00693648	0.923164	0.031	0.015	1
Fbh1	0.00693772	-0.399804	0.139	0.179	1
Arhgap45	0.00696712	-0.582608	0.092	0.127	1
Ebpl	0.007114	0.979469	0.035	0.018	1
2900089D17Rik	0.00711673	1.20527	0.038	0.02	1
Txndc15	0.00715365	0.545108	0.049	0.028	1
Supt5	0.00719434	-0.591482	0.099	0.135	1
Slc25a36	0.00721759	0.250475	0.412	0.364	1
Gm47350	0.007264	0.994096	0.055	0.033	1
Herc2	0.00728422	-0.301801	0.352	0.396	1
Ptprm	0.00735027	-0.0852145	0.934	0.945	1
St3gal6	0.00735607	0.373969	0.209	0.166	1
Foxp1	0.00737171	-0.202484	0.591	0.62	1
H2-Q6	0.00739428	-0.986201	0.018	0.037	1
Gm15886	0.00739676	0.79249	0.065	0.041	1
Ankrd46	0.00742706	0.88535	0.037	0.019	1
Ets2	0.00745882	0.678662	0.114	0.083	1
Polr3h	0.00746295	0.638616	0.045	0.025	1
Tmem135	0.00747322	0.205587	0.435	0.383	1
Mark2	0.00747391	-0.256412	0.303	0.354	1
Ikzf2	0.00749196	-0.855736	0.035	0.058	1
Ptpn1	0.00752654	-0.205739	0.438	0.483	1
Map1lc3b	0.00757519	0.585636	0.076	0.05	1
Rapgef6	0.00764777	0.169975	0.514	0.463	1
Gmip	0.0076773	-0.35338	0.294	0.341	1
Prkdc	0.00768592	-0.324918	0.161	0.205	1
Smg7	0.00770564	-0.317296	0.224	0.271	1
Pola1	0.00770791	-0.325772	0.381	0.42	1
D5Ertd579e	0.00772196	-0.291493	0.313	0.362	1
Spaca6	0.00773518	-1.33177	0.014	0.031	1
Dnajc3	0.00774832	0.458926	0.205	0.165	1
Atp9b	0.00780046	-0.300472	0.303	0.344	1
Stxbp3	0.00782274	0.289692	0.218	0.175	1
Blvrb	0.00783276	0.259634	0.355	0.306	1
Nnmt	0.00785211	1.27064	0.015	0.005	1
Top2b	0.00791048	0.267638	0.279	0.231	1
Sema6d	0.00794918	0.124329	0.832	0.798	1
Fam120b	0.0079921	0.515593	0.164	0.129	1
Bcl2	0.0080159	-0.569707	0.067	0.097	1
Rab1a	0.00804273	-0.255386	0.259	0.308	1
Gm21887	0.0080799	-0.976191	0.015	0.032	1
Ppp6r3	0.00808482	-0.204433	0.359	0.413	1
Ank3	0.00813975	-0.873812	0.016	0.034	1
Etfb	0.00814124	0.67742	0.064	0.04	1
Kdm2b	0.00819869	-0.425099	0.077	0.11	1
Cep120	0.00820697	-0.504454	0.102	0.137	1
Astn2	0.00824099	-1.42158	0.01	0.024	1
Eif2ak4	0.00826801	-0.482135	0.16	0.202	1
Ino80	0.00827497	-0.239917	0.256	0.304	1
Lrrfip1	0.00831579	-0.380352	0.213	0.252	1
Igf1	0.00831903	-0.174452	0.548	0.604	1
Map3k8	0.00834176	-0.273545	0.248	0.294	1
Uqcrh	0.00835366	0.604337	0.093	0.065	1
2210408I21Rik	0.00850137	-0.478836	0.18	0.22	1
Acp5	0.00850956	0.632625	0.105	0.075	1
Eif2s3x	0.00854379	-0.606961	0.032	0.054	1
Ankrd27	0.00864345	-0.698823	0.057	0.085	1
Tnfaip8	0.00865964	0.282416	0.269	0.222	1
Dnaja1	0.00873975	0.31888	0.186	0.149	1
Sdc3	0.0087947	-0.224725	0.525	0.571	1
Hist1h1c	0.00880241	0.476509	0.057	0.035	1
Cidec	0.00886764	5.63638	0.005	0	1
Slc39a14	0.00890226	-0.97441	0.038	0.061	1
Itgav	0.00897311	0.201768	0.502	0.457	1
Eepd1	0.00900971	-0.395182	0.232	0.273	1
Kat14	0.00901889	-0.638759	0.061	0.089	1
Col27a1	0.0090263	-0.800428	0.026	0.046	1
Rmdn3	0.00909606	-0.275681	0.024	0.044	1
mt-Nd2	0.00910532	0.456642	0.19	0.152	1
Kmt2d	0.00912896	-0.387115	0.155	0.196	1
Larp4	0.00920895	0.336389	0.224	0.183	1
Samd12	0.00922201	-1.93252	0.003	0.013	1
Rufy2	0.00924772	0.522794	0.072	0.047	1
Nsmf	0.00927894	-1.0907	0.018	0.036	1
Rtn4	0.00929436	-0.174348	0.544	0.579	1
Nucks1	0.00934067	0.253006	0.123	0.089	1
Zmiz1	0.0093716	0.259949	0.221	0.177	1
Raph1	0.00941342	0.305549	0.269	0.225	1
Usp6nl	0.00948968	-0.384114	0.171	0.213	1
Gm31243	0.00951374	0.30348	0.382	0.339	1
Ptch1	0.00955505	-1.51141	0.006	0.018	1
Capza2	0.00959925	0.210507	0.48	0.43	1
Cd302	0.00961859	0.324584	0.337	0.294	1
Itga4	0.00962389	-0.2683	0.302	0.345	1
Atp2a2	0.00962995	0.22754	0.311	0.261	1
Foxn3	0.00969565	0.126016	0.888	0.883	1
Bzw2	0.00969771	-0.961225	0.018	0.036	1
Gm20721	0.00970304	0.451309	0.05	0.03	1
Bcap31	0.00970679	0.6375	0.095	0.068	1
S100a10	0.00971665	0.887699	0.027	0.013	1
Snx29	0.00976545	0.294858	0.373	0.333	1
Amn1	0.00978184	0.436609	0.171	0.136	1
Meis2	0.00982288	-1.07358	0.006	0.018	1
Braf	0.00982515	-0.314725	0.366	0.405	1
Rps8	0.00983411	0.427506	0.2	0.162	1
Oit3	0.00984255	1.6239	0.013	0.004	1
Usp8	0.00985806	0.192886	0.364	0.313	1
Iscu	0.00986504	0.774415	0.042	0.024	1
Insig2	0.00989399	0.399834	0.093	0.065	1
Txlna	0.00990672	-0.691452	0.049	0.075	1
Cast	0.00999285	0.335425	0.207	0.167	1
Chsy1	0.0100085	0.396901	0.135	0.101	1
Zeb1	0.0100176	-0.461776	0.078	0.109	1
Mrps26	0.0100744	0.603465	0.048	0.028	1
Mpc1	0.0100872	0.617624	0.078	0.053	1
Amy1	0.010107	0.610764	0.068	0.044	1
Wnk1	0.0101096	0.138267	0.807	0.762	1
Gcn1	0.0101139	-0.644622	0.065	0.093	1
Zfand6	0.0101238	0.174564	0.427	0.375	1
Mettl26	0.0101644	1.12317	0.032	0.016	1
Srrm2	0.0101672	-0.114832	0.74	0.764	1
Exoc4	0.0101842	-0.121321	0.693	0.732	1
Eloc	0.0101901	0.636487	0.096	0.068	1
Gna14	0.0102041	-5.3797	0	0.006	1
Anapc5	0.0102164	-0.459074	0.086	0.118	1
Tmem205	0.010229	0.790189	0.069	0.046	1
Cfhr1	0.0102355	1.09774	0.033	0.017	1
9130016M20Rik	0.0103058	1.80234	0.018	0.007	1
Sri	0.0103669	-0.837961	0.035	0.057	1
Snx2	0.0103697	-0.130932	0.505	0.566	1
Caprin1	0.0103703	-0.216432	0.356	0.405	1
Ikbkb	0.0103886	-0.348536	0.237	0.279	1
Czib	0.0104589	-0.753928	0.045	0.07	1
Lin7c	0.0104611	-0.715072	0.028	0.049	1
Ddx10	0.0104698	-0.283446	0.212	0.258	1
Mrpl14	0.0104749	0.783211	0.041	0.023	1
Trak2	0.0104772	-0.600337	0.062	0.089	1
Acaa2	0.0105354	0.370526	0.104	0.074	1
Klf6	0.0105369	0.426132	0.187	0.151	1
Cyp2c50	0.0105801	0.81097	0.042	0.024	1
Haus3	0.0106322	0.712723	0.055	0.034	1
Ip6k1	0.0106816	-0.287963	0.243	0.289	1
Rras2	0.0107298	-0.312766	0.102	0.137	1
Atp6v0b	0.0107306	0.207827	0.531	0.48	1
Aldh6a1	0.0107951	1.01465	0.049	0.03	1
Snta1	0.0108008	0.380112	0.205	0.165	1
Camta2	0.0108246	-0.442029	0.158	0.196	1
Tomm34	0.0108341	-0.394448	0.074	0.105	1
Eva1a	0.0108386	1.20455	0.018	0.007	1
Acrbp	0.0109554	-0.421263	0.076	0.107	1
Blm	0.0110766	-1.31609	0.01	0.023	1
Smim4	0.0111022	0.435642	0.106	0.076	1
H2-Eb1	0.0111194	-0.333621	0.193	0.232	1
Ghr	0.0111891	-0.558859	0.131	0.166	1
Txndc11	0.0112001	0.31109	0.229	0.187	1
Snx5	0.0112633	0.186811	0.505	0.458	1
Ilf3	0.0112977	-0.529744	0.057	0.084	1
Pfn1	0.0113776	0.291036	0.182	0.143	1
Lman1	0.0113805	0.472076	0.083	0.057	1
Cacna2d1	0.0114119	-3.57631	0.001	0.008	1
Khk	0.0114272	0.682597	0.062	0.039	1
Hoga1	0.0114383	1.4805	0.019	0.008	1
Inhba	0.0114716	-3.50043	0.001	0.008	1
Srpk2	0.0114735	0.298756	0.273	0.235	1
Ptprt	0.0114865	-3.33549	0.001	0.008	1
Fggy	0.011491	-0.330699	0.163	0.203	1
Dcaf5	0.0115053	-0.383143	0.212	0.252	1
Plekha6	0.0115316	-2.7472	0.001	0.008	1
Haus6	0.0116078	0.781478	0.071	0.048	1
Lsr	0.0116679	1.71212	0.02	0.008	1
Smdt1	0.0117088	0.755765	0.049	0.03	1
Spata1	0.0117386	0.589854	0.088	0.061	1
Zyx	0.0117957	-0.397157	0.132	0.168	1
Gdf15	0.0117999	1.25814	0.013	0.004	1
Gna13	0.0118102	-0.3727	0.226	0.267	1
Rock2	0.0119444	0.221935	0.647	0.627	1
Npm1	0.0120245	0.586839	0.085	0.059	1
Irf8	0.0120275	-0.28522	0.218	0.258	1
Auts2	0.012071	-1.85678	0.005	0.015	1
Hps4	0.0120932	-0.718879	0.057	0.083	1
Ccdc107	0.0121105	0.733852	0.071	0.048	1
Stim2	0.0121298	-0.269364	0.209	0.252	1
Cd1d1	0.012138	-0.462361	0.131	0.165	1
Gls2	0.012265	1.13464	0.02	0.008	1
Dock6	0.0123129	-1.46386	0.015	0.031	1
Plk3	0.0123288	0.9853	0.043	0.025	1
Ehbp1l1	0.0123865	-0.408479	0.198	0.237	1
Lyn	0.0124022	-0.104249	0.942	0.956	1
Zdhhc17	0.0124173	-0.469776	0.141	0.175	1
Npc1	0.0125114	0.303456	0.183	0.146	1
Ephx2	0.0125937	0.396772	0.054	0.033	1
Ranbp3	0.0126163	-0.620739	0.041	0.065	1
Lrrc8d	0.0127148	-0.317293	0.206	0.247	1
Traf5	0.0127293	-0.518935	0.077	0.106	1
Cpsf4	0.0127819	-0.741762	0.045	0.069	1
Smad7	0.0128088	0.366734	0.224	0.186	1
Zfp367	0.0128265	-0.927323	0.026	0.045	1
Mob1a	0.0129101	0.501844	0.101	0.073	1
Pirb	0.0129165	-0.292042	0.396	0.437	1
Nudt21	0.013049	-0.798958	0.03	0.05	1
Coq10b	0.0130548	0.548175	0.096	0.069	1
Gabarapl2	0.0130948	0.745015	0.045	0.027	1
Zfp568	0.0131439	-0.505059	0.041	0.065	1
Ddb1	0.0131502	-0.654766	0.053	0.078	1
Cyyr1	0.0132139	-2.44443	0.003	0.012	1
Gng5	0.0133497	0.641118	0.066	0.043	1
Snx10	0.013377	-0.287247	0.322	0.362	1
Sec63	0.0134027	0.265369	0.343	0.296	1
Zbtb37	0.01341	-0.453319	0.07	0.099	1
Ston2	0.0134122	-0.27015	0.409	0.444	1
Arhgap18	0.0135891	-0.229044	0.286	0.332	1
Lgals8	0.0135923	-0.366677	0.223	0.263	1
Kctd2	0.0136431	-0.659347	0.037	0.058	1
Ndufab1	0.0137137	0.51442	0.058	0.037	1
Tbc1d10a	0.0137426	0.642669	0.056	0.035	1
Sgf29	0.0138025	-0.685387	0.03	0.05	1
Cped1	0.013865	-0.570832	0.021	0.039	1
Snx9	0.0138793	0.27104	0.321	0.278	1
Vipas39	0.0139709	-0.599278	0.048	0.073	1
Myo6	0.0140604	-0.566447	0.04	0.063	1
Grm8	0.0140971	-1.2631	0.007	0.018	1
Pknox1	0.0140981	0.352915	0.102	0.073	1
Acbd5	0.0141412	0.384904	0.219	0.181	1
Pgm2l1	0.014151	0.340624	0.176	0.139	1
Gm15991	0.0141813	1.00588	0.038	0.021	1
Slc22a23	0.0142096	0.251167	0.229	0.187	1
Nsfl1c	0.0142288	-0.96377	0.028	0.047	1
Ptprd	0.0142472	-0.516681	0.054	0.08	1
Tor1b	0.014248	-0.624178	0.063	0.089	1
Trnau1ap	0.0143511	-0.597791	0.06	0.086	1
Ccnt2	0.0143596	-0.241245	0.383	0.42	1
Lncpint	0.0143834	0.185628	0.543	0.503	1
Vegfa	0.0144098	-1.43643	0.012	0.025	1
Ms4a4d	0.014458	1.90905	0.011	0.003	1
Tmem214	0.0145074	-0.56457	0.077	0.106	1
Lrrc8c	0.0145305	-0.374292	0.121	0.158	1
Sp110	0.0145369	-0.402168	0.139	0.175	1
Zc3h6	0.0145594	0.451638	0.067	0.044	1
Cxadr	0.0145975	1.06919	0.025	0.012	1
Zbtb48	0.0147509	-1.01309	0.013	0.027	1
Apon	0.014763	0.477857	0.04	0.023	1
Cpq	0.0148458	-0.110589	0.765	0.787	1
Rela	0.0148639	-0.626132	0.06	0.086	1
C3	0.0149037	0.318381	0.16	0.125	1
Reep3	0.0149702	0.346783	0.183	0.146	1
Slc27a5	0.0150871	0.944303	0.029	0.015	1
Cluap1	0.0150899	0.43588	0.071	0.048	1
Exoc5	0.0150912	0.305271	0.326	0.285	1
Nrp2	0.0151442	-2.27513	0.004	0.013	1
Gm16093	0.0151649	1.00911	0.029	0.015	1
Lbp	0.0151771	1.0742	0.027	0.013	1
Mtdh	0.0151826	0.221112	0.408	0.364	1
Mrrf	0.0151831	0.836153	0.037	0.02	1
2300009A05Rik	0.0152865	0.770431	0.035	0.019	1
Car5a	0.0153752	2.54872	0.008	0.001	1
Wdr81	0.015434	-0.740184	0.049	0.073	1
Polr1a	0.0154583	-0.549201	0.1	0.13	1
Rpl12	0.0155064	0.583889	0.109	0.081	1
Slfn5	0.0155655	-0.276755	0.213	0.256	1
Fbxl17	0.0155675	-0.136226	0.7	0.727	1
2310022B05Rik	0.015582	-1.5292	0.004	0.013	1
Cox6a1	0.0156457	0.692848	0.059	0.038	1
Gm27017	0.0156691	0.542957	0.099	0.073	1
Uqcc1	0.0157327	-0.396126	0.091	0.122	1
Dmac2	0.0157506	0.803064	0.046	0.028	1
Mkln1	0.0158036	0.150744	0.566	0.527	1
Gtpbp1	0.0158226	-0.679833	0.038	0.059	1
Apobec1	0.0159824	0.139077	0.731	0.696	1
Xpo6	0.0159825	-0.229948	0.227	0.271	1
Cox16	0.0160909	-0.213645	0.41	0.455	1
Swt1	0.0161833	0.369287	0.187	0.153	1
0610010F05Rik	0.0163407	0.407051	0.141	0.109	1
Pcmtd1	0.0164772	0.303423	0.308	0.267	1
Calm1	0.0165285	0.4207	0.15	0.118	1
Fbrs	0.0165315	-0.425074	0.092	0.122	1
Eef1g	0.0165497	-0.403901	0.086	0.116	1
Rpl7l1	0.0165653	0.860509	0.061	0.04	1
Pura	0.0165821	0.320836	0.209	0.17	1
Mtor	0.0167486	-0.46021	0.085	0.114	1
Vav2	0.0168372	-0.268941	0.351	0.392	1
Plpp3	0.0169529	-0.493923	0.164	0.199	1
Snx18	0.0171354	0.219652	0.176	0.139	1
Rpl22	0.0171836	0.428987	0.096	0.07	1
Irf2bp2	0.017205	0.252489	0.21	0.172	1
Ppm1h	0.0172228	0.114282	0.793	0.775	1
Kalrn	0.0172262	-1.40657	0.005	0.015	1
Abcb4	0.0172538	-0.380932	0.103	0.135	1
Snhg8	0.017283	0.44822	0.05	0.031	1
Ccdc186	0.0172892	0.471204	0.103	0.076	1
Hjurp	0.0173123	-0.445941	0.185	0.221	1
Ndufb10	0.0173454	0.858773	0.044	0.027	1
Rsrc1	0.0173531	-0.202416	0.486	0.529	1
Rbm47	0.0174397	-0.167826	0.697	0.73	1
Cox5b	0.0174444	0.726761	0.045	0.027	1
Tnpo2	0.0174606	-0.58429	0.066	0.092	1
Slc39a8	0.0174809	1.29289	0.017	0.007	1
Aldh3a2	0.0176186	0.671676	0.063	0.042	1
Klhl29	0.01765	0.619212	0.075	0.052	1
Slc45a3	0.0177659	0.548828	0.141	0.111	1
Rdh16f2	0.0177686	1.33791	0.012	0.004	1
Slc9a1	0.0177742	-0.392368	0.112	0.146	1
Cdk10	0.0177869	-0.592678	0.059	0.084	1
Esd	0.0177987	0.570601	0.056	0.036	1
Gm16599	0.0178239	0.567491	0.126	0.098	1
Cd5l	0.0178399	-0.141401	0.86	0.867	1
Fis1	0.0178619	0.451145	0.089	0.063	1
Bst2	0.0178846	0.223414	0.111	0.082	1
Pam16	0.0179032	-0.342564	0.047	0.071	1
4833420G17Rik	0.0179033	0.281026	0.212	0.175	1
Nars	0.0179715	0.392617	0.152	0.12	1
Inpp5a	0.0180996	-0.473607	0.111	0.143	1
Ei24	0.0181627	0.558462	0.058	0.037	1
Nup54	0.0181828	-0.484288	0.065	0.091	1
Slco1a1	0.0183118	0.481148	0.077	0.054	1
Prr14l	0.0183465	-0.27331	0.274	0.317	1
Fgfr2	0.0183484	0.315442	0.307	0.265	1
Dcp1b	0.0183752	-0.361932	0.054	0.079	1
Purb	0.0183854	0.457562	0.143	0.112	1
Slc25a21	0.0184997	-1.04441	0.013	0.027	1
Ctbp2	0.0185114	0.548767	0.061	0.04	1
Ccdc91	0.0185882	-0.659231	0.063	0.088	1
Gmps	0.0186639	0.420409	0.123	0.093	1
Asxl2	0.0186993	0.157278	0.517	0.475	1
Herc4	0.0187177	0.119128	0.628	0.588	1
Rtf1	0.0188071	-0.313568	0.118	0.154	1
Ndufb1-ps	0.0188297	0.582971	0.062	0.041	1
Apoa4	0.0188523	1.43957	0.019	0.008	1
Ints6l	0.018897	0.349198	0.208	0.173	1
Rbpj	0.0189541	-0.348987	0.108	0.14	1
Srsf4	0.0189716	-0.32921	0.113	0.146	1
Dnajc10	0.0190004	0.526405	0.076	0.053	1
Synj1	0.019028	0.244807	0.45	0.408	1
4930455C13Rik	0.0190442	1.06379	0.039	0.023	1
Runx2	0.0191306	0.670218	0.06	0.039	1
Actn1	0.0191811	-0.229231	0.399	0.444	1
Parvb	0.0192076	0.256088	0.224	0.185	1
Arhgef26	0.0192186	-1.16482	0.011	0.023	1
Efr3a	0.0192528	-0.36866	0.191	0.227	1
Abi3bp	0.0192566	1.30488	0.019	0.008	1
Serp1	0.0192661	0.717608	0.074	0.052	1
2810459M11Rik	0.0192703	4.73284	0.004	0	1
Gm16158	0.0192703	5.05806	0.004	0	1
Clic1	0.0194008	0.300811	0.149	0.117	1
9930021J03Rik	0.0194323	0.220921	0.344	0.301	1
0610012G03Rik	0.0194391	0.580724	0.073	0.051	1
Setdb2	0.0194824	-0.318347	0.045	0.068	1
Rnf11	0.0195306	-0.427888	0.059	0.084	1
Baz2a	0.0196782	-0.316816	0.243	0.282	1
Strn4	0.0197846	-0.556694	0.065	0.09	1
Slco1a4	0.0198079	1.42536	0.006	0.001	1
Fxyd1	0.0198142	0.483023	0.039	0.023	1
Mbtd1	0.0198877	-0.22437	0.373	0.416	1
Crtc2	0.0199101	-0.509961	0.048	0.071	1
Timm44	0.0199342	-0.431799	0.092	0.12	1
Map3k3	0.0199342	0.202946	0.483	0.436	1
Tmem126a	0.0199509	0.475477	0.083	0.058	1
Dhcr24	0.0199739	0.660623	0.039	0.023	1
Nedd8	0.0199797	0.444123	0.07	0.048	1
Thumpd3	0.0200734	0.304426	0.124	0.094	1
Snx27	0.020091	-0.383705	0.192	0.225	1
Hdgf	0.0200957	0.450599	0.068	0.046	1
4930565N06Rik	0.0201964	1.41122	0.021	0.01	1
Cabin1	0.0202227	-0.465273	0.098	0.128	1
Aldh1a7	0.0202334	1.67556	0.013	0.004	1
Aup1	0.020302	-0.447661	0.071	0.098	1
Nol8	0.02031	-0.611256	0.044	0.066	1
Gk	0.0203786	-0.401299	0.044	0.067	1
Arl5b	0.0204133	-0.592735	0.037	0.057	1
Il31ra	0.0204336	-0.710597	0.045	0.067	1
Aplp2	0.0204867	0.311605	0.109	0.081	1
Dleu2	0.0205666	0.153733	0.8	0.801	1
Xrcc6	0.0206293	0.891931	0.048	0.03	1
Glrx5	0.0206467	1.31818	0.021	0.01	1
Slc37a3	0.0206838	-0.574938	0.042	0.064	1
Golim4	0.0207252	-0.380955	0.138	0.172	1
Tuba4a	0.0207625	1.38286	0.022	0.011	1
Dgkz	0.020763	-0.267853	0.342	0.383	1
Me1	0.020766	0.573583	0.04	0.024	1
Lars2	0.0208026	-0.359533	0.2	0.237	1
Bank1	0.0208444	-0.108733	0.843	0.879	1
Zfp182	0.0208573	0.257587	0.216	0.179	1
Fam135a	0.0208961	-0.326612	0.084	0.113	1
Max	0.0209334	-0.230964	0.181	0.22	1
Pfkfb3	0.020945	-0.385765	0.151	0.185	1
Naip2	0.0211662	-0.273165	0.237	0.279	1
Fnbp4	0.0211908	-0.231158	0.265	0.308	1
Metap1d	0.0212318	-0.613593	0.071	0.097	1
Ssu72	0.0212459	0.35927	0.154	0.123	1
Mtmr4	0.0214605	-0.646702	0.036	0.056	1
Grb7	0.0214937	1.47295	0.009	0.002	1
Mup9	0.0217133	-1.96158	0.004	0.013	1
Ccdc171	0.0217573	-0.331919	0.135	0.168	1
Higd1a	0.0218032	0.787287	0.034	0.019	1
Ugp2	0.0218185	0.300112	0.203	0.167	1
Bmp2k	0.0218255	0.247034	0.316	0.28	1
Rps9	0.0218317	0.329642	0.199	0.163	1
Prkag1	0.0218779	-0.336118	0.065	0.091	1
Acin1	0.0218976	-0.283729	0.308	0.346	1
Atg4a	0.0220254	-0.769221	0.028	0.046	1
Sumo3	0.0221425	0.432058	0.106	0.08	1
Atad2b	0.0221685	0.189137	0.317	0.276	1
Anp32b	0.0221728	0.418377	0.091	0.065	1
Mark4	0.0222103	-0.558216	0.065	0.089	1
Mpv17l	0.0222351	0.628457	0.061	0.041	1
Galnt11	0.0222791	0.356491	0.16	0.127	1
Rpn1	0.0223538	0.533085	0.099	0.074	1
Tjap1	0.0223791	-0.682912	0.035	0.054	1
Ric8b	0.0224583	-0.481557	0.118	0.149	1
Tpcn1	0.0224636	0.979341	0.027	0.014	1
Urah	0.0224655	0.943288	0.026	0.013	1
Ezh2	0.0224663	-0.542037	0.059	0.083	1
Hectd4	0.0224743	-0.320539	0.145	0.178	1
Keg1	0.0225034	0.78601	0.025	0.013	1
Lacc1	0.0225553	-0.239365	0.235	0.275	1
Arhgap24	0.0226927	-0.483349	0.066	0.092	1
Adgre1	0.0227291	-0.0984027	0.766	0.802	1
Cdip1	0.0227403	0.238934	0.241	0.202	1
Ptprk	0.0227798	-0.708113	0.031	0.049	1
Adipor2	0.0229004	-0.416783	0.119	0.151	1
F10	0.0229912	0.831071	0.026	0.013	1
Gm2788	0.0230823	-2.27338	0.002	0.009	1
Tmem59	0.0231072	0.378436	0.177	0.146	1
Fbxl20	0.0231194	0.11954	0.413	0.365	1
Set	0.0231214	0.447914	0.071	0.049	1
Vps72	0.0231677	0.580526	0.062	0.042	1
H2-T22	0.02334	-0.560107	0.043	0.065	1
Mir142hg	0.0234993	0.227856	0.316	0.276	1
Lgals4	0.0235049	-1.62923	0.005	0.014	1
Ift81	0.0235428	-4.81639	0	0.005	1
Lmo7	0.0235428	-5.07159	0	0.005	1
Mapk12	0.0235428	-4.70217	0	0.005	1
Gm14964	0.0235428	-4.4279	0	0.005	1
Mamdc2	0.0235428	-5.02745	0	0.005	1
Dmpk	0.0235504	-0.145306	0.74	0.733	1
2002-03-01	0.0235548	0.513756	0.068	0.047	1
Luc7l	0.0235698	-0.288076	0.178	0.217	1
Enpp1	0.0236101	0.708072	0.094	0.07	1
Il15	0.0236453	-0.241321	0.488	0.516	1
Dgcr8	0.0236563	0.45175	0.115	0.088	1
Dmd	0.0237682	-0.741911	0.014	0.028	1
Gm17227	0.0237863	0.614625	0.068	0.047	1
H3f3a	0.0238272	0.465194	0.143	0.113	1
Atp5d	0.0239012	0.689221	0.066	0.045	1
Kdm5a	0.0239164	0.266093	0.266	0.227	1
Gm48321	0.0239598	0.368022	0.118	0.09	1
Klf12	0.0239636	-0.675752	0.014	0.028	1
Atp6v1a	0.0239797	0.30836	0.243	0.206	1
Ly6e	0.0240953	-0.226116	0.329	0.377	1
Gvin1	0.0241705	-0.405624	0.145	0.176	1
Vrk3	0.0242539	-0.879247	0.029	0.046	1
Parp10	0.0243077	-0.505035	0.057	0.08	1
Lpp	0.0243309	-0.14929	0.63	0.647	1
Pcnx	0.0243875	0.57505	0.093	0.069	1
Iffo1	0.0244529	-0.389704	0.081	0.108	1
Zfp362	0.0245059	0.553036	0.072	0.051	1
Insr	0.024507	-0.206947	0.322	0.365	1
Zbtb7c	0.0246194	-0.804904	0.013	0.027	1
Ugt2b34	0.024646	0.262346	0.027	0.014	1
Inf2	0.0246638	-0.490032	0.091	0.118	1
Zfp438	0.0247165	0.711671	0.064	0.044	1
Reps2	0.0247678	1.39691	0.014	0.006	1
9030622O22Rik	0.0248446	-0.972597	0.018	0.033	1
Ndfip1	0.0249103	0.256808	0.42	0.379	1
Nudcd3	0.0249772	-0.289133	0.267	0.301	1
Baz2b	0.0250318	-0.165041	0.471	0.514	1
Cdk17	0.0250499	-0.196206	0.383	0.432	1
Cdk11b	0.0251381	-0.288621	0.108	0.139	1
Wwp1	0.0251867	0.187486	0.567	0.521	1
Dnase1l3	0.0252564	-0.515171	0.042	0.063	1
Ube2w	0.0252993	-0.204492	0.194	0.235	1
Frrs1	0.0253131	0.245747	0.335	0.295	1
Ncald	0.0253211	-1.48821	0.011	0.023	1
Acox1	0.0253348	0.326899	0.232	0.196	1
Hc	0.0254003	-0.62078	0.055	0.077	1
Cdc23	0.0255373	0.679385	0.042	0.026	1
Tnfsf10	0.0255708	-1.3924	0.011	0.023	1
H2afj	0.0256386	0.294531	0.182	0.149	1
Rmnd1	0.0256529	-0.374358	0.108	0.138	1
Nfxl1	0.0256857	0.197565	0.402	0.36	1
Echdc1	0.0257886	0.578356	0.071	0.05	1
Samhd1	0.0258243	-0.134087	0.545	0.587	1
Magi2	0.0258769	-1.51277	0.008	0.018	1
Tsc22d4	0.0258917	-0.294568	0.173	0.209	1
Cdc42	0.0259003	0.134182	0.552	0.508	1
Etfbkmt	0.0259005	-0.954829	0.021	0.037	1
Pex13	0.0259131	0.426591	0.16	0.129	1
Syt1	0.0259475	-0.750364	0.001	0.007	1
Ash1l	0.0259837	-0.185817	0.508	0.541	1
Bag6	0.026044	-0.737206	0.04	0.061	1
Tiparp	0.0260509	0.414532	0.186	0.156	1
Upp2	0.0260796	0.297829	0.145	0.114	1
Zfp933	0.026128	0.508087	0.083	0.06	1
Zbtb7a	0.0261544	-0.401156	0.13	0.162	1
Nars2	0.0262841	-0.338196	0.075	0.101	1
Tfdp2	0.0264903	0.42011	0.084	0.061	1
Prelp	0.0264933	2.04094	0.01	0.003	1
Aopep	0.0265122	-0.190873	0.334	0.373	1
Psmc6	0.0265578	0.414799	0.122	0.094	1
Avl9	0.0265666	0.320623	0.167	0.135	1
Angptl2	0.0265698	1.4376	0.015	0.006	1
Psmd2	0.0265787	-0.722885	0.042	0.063	1
2510009E07Rik	0.0266024	-0.237931	0.399	0.432	1
Tet3	0.0266052	0.224206	0.446	0.409	1
B4galt1	0.0266705	0.329286	0.293	0.258	1
Alkbh3	0.0267177	-0.583042	0.048	0.07	1
Fam20a	0.0267345	1.34047	0.01	0.003	1
Abcb11	0.0267814	-0.574478	0.038	0.057	1
Zfp617	0.0268018	0.627081	0.04	0.025	1
Setd1a	0.0269505	-0.588941	0.032	0.05	1
Dennd6a	0.027258	0.186703	0.371	0.331	1
Nup205	0.0272696	0.57692	0.085	0.062	1
Snap23	0.0272995	0.170348	0.455	0.412	1
Ankrd17	0.0273329	-0.117576	0.597	0.642	1
Itch	0.027335	-0.170972	0.657	0.67	1
Ptdss1	0.0273938	-0.574317	0.053	0.075	1
Mllt3	0.0274497	-0.335506	0.161	0.194	1
Arf1	0.0274531	0.338977	0.145	0.115	1
Sf1	0.0274939	-0.343216	0.189	0.225	1
Cpeb2	0.0275625	0.223516	0.27	0.232	1
Fam20b	0.0276042	-0.801534	0.024	0.04	1
Apoc2	0.0276062	0.410288	0.052	0.034	1
Ces3b	0.0276255	-1.15045	0.019	0.034	1
Naa25	0.0276339	-0.373658	0.081	0.108	1
Rnf115	0.0276343	-0.2623	0.239	0.277	1
Ints6	0.0276473	0.213999	0.253	0.214	1
D2hgdh	0.0277356	-0.405574	0.049	0.071	1
Taok1	0.0278195	0.212714	0.46	0.424	1
Dyrk2	0.0278855	-0.456797	0.129	0.158	1
Slc30a6	0.0279427	0.548071	0.04	0.025	1
Sod2	0.0279667	0.652383	0.087	0.064	1
Tmem204	0.0279918	1.30087	0.016	0.007	1
Eif5	0.0281744	0.306696	0.227	0.194	1
Zfp451	0.0283574	-0.266492	0.181	0.215	1
Hnf4a	0.0285235	0.81808	0.037	0.022	1
2001-03-01	0.0285335	0.142123	0.732	0.708	1
Prdx6	0.0286101	0.696777	0.056	0.037	1
Arap2	0.0287	-0.184064	0.379	0.422	1
2010315B03Rik	0.0288325	0.344884	0.108	0.082	1
Lin52	0.0290415	-0.364247	0.128	0.158	1
Clk2	0.0290421	-0.395705	0.085	0.111	1
Kcnk13	0.0291365	0.169916	0.584	0.559	1
Slc25a12	0.0292151	-0.27186	0.149	0.184	1
Edc4	0.0292644	-0.539235	0.037	0.056	1
Smc6	0.0292649	-0.160192	0.168	0.205	1
Hmgcs2	0.0293122	0.23189	0.129	0.1	1
Erp44	0.0293366	0.312535	0.201	0.168	1
Plod1	0.0295827	0.230773	0.253	0.215	1
Prlr	0.0295855	1.24164	0.017	0.008	1
Gpcpd1	0.0295874	-0.168716	0.404	0.438	1
Hprt	0.0297006	0.321949	0.172	0.141	1
Cd300a	0.0297432	0.208345	0.459	0.417	1
Sec61g	0.029815	-0.534349	0.055	0.077	1
Pipox	0.0298268	1.35009	0.018	0.008	1
Ddhd1	0.0298607	-0.128231	0.703	0.736	1
Tbc1d17	0.0299005	-0.718227	0.033	0.051	1
Gnai2	0.0299028	-0.316315	0.171	0.204	1
Hps3	0.0299655	0.164023	0.398	0.356	1
Smarce1	0.0300422	0.411244	0.094	0.07	1
Zfp839	0.030091	-0.605414	0.047	0.068	1
Cdc14b	0.0302543	-0.625048	0.047	0.068	1
Dclre1a	0.0302748	-0.551745	0.02	0.035	1
Tmed2	0.0303224	0.400089	0.102	0.077	1
Ptpmt1	0.0303445	0.625913	0.046	0.03	1
Dsc2	0.0304201	2.75327	0.007	0.001	1
Tsc22d1	0.0304802	0.218558	0.116	0.089	1
Katnbl1	0.0306358	0.370825	0.113	0.087	1
Rasip1	0.0307164	1.84222	0.007	0.001	1
Setd7	0.0308213	-0.589249	0.064	0.087	1
Ptprc	0.0308817	0.0795366	0.859	0.837	1
Fahd1	0.0309205	0.974155	0.018	0.008	1
Rps27l	0.031023	0.373962	0.045	0.029	1
Cp	0.0310485	-0.396053	0.128	0.158	1
Pdcd11	0.0311431	-0.456998	0.06	0.082	1
Eefsec	0.0311498	-0.39418	0.109	0.138	1
Gm34667	0.0311835	1.5057	0.011	0.004	1
Slc8a1	0.0311848	-0.0905508	0.962	0.958	1
Rpl23a	0.0311852	0.741512	0.051	0.034	1
Lias	0.0312991	0.683567	0.044	0.028	1
Plscr4	0.0313421	1.08445	0.02	0.01	1
Otud5	0.0313848	-0.213543	0.169	0.202	1
Gm4258	0.0314015	0.259643	0.199	0.164	1
Gab1	0.0314202	0.275791	0.19	0.156	1
Gm37768	0.0314295	0.60784	0.074	0.054	1
Cmc4	0.031523	0.705236	0.035	0.02	1
Trmt1	0.0315321	-0.533711	0.062	0.085	1
Uri1	0.0315402	-0.1477	0.243	0.286	1
Ehhadh	0.0315536	0.766372	0.03	0.017	1
Slf1	0.0315752	0.333719	0.135	0.107	1
A930005H10Rik	0.0316239	1.29106	0.021	0.011	1
Esam	0.0316392	0.977995	0.011	0.004	1
Tomm20	0.0317083	0.546591	0.052	0.035	1
Grn	0.0318089	-0.206701	0.354	0.396	1
Cdkal1	0.0318539	-0.153632	0.335	0.38	1
Alg9	0.0318788	-0.546778	0.038	0.056	1
Rnft1	0.0318817	0.394956	0.104	0.08	1
Slc36a1	0.0319192	-0.349447	0.132	0.163	1
Cox14	0.0319805	0.603881	0.043	0.027	1
Rock1	0.0320487	0.125618	0.494	0.457	1
Cenpc1	0.0320589	0.471565	0.108	0.083	1
Mug1	0.0320806	0.28113	0.183	0.152	1
Gga1	0.032197	-0.517487	0.125	0.154	1
Lrrc39	0.0322173	1.36759	0.024	0.013	1
Insig1	0.0322336	0.568169	0.07	0.05	1
Tst	0.0322479	1.31454	0.023	0.012	1
Jarid2	0.032437	-0.201825	0.355	0.394	1
Mbl1	0.032576	1.02387	0.024	0.013	1
Shroom3	0.0326639	-1.95539	0.005	0.013	1
Dnhd1	0.032706	-0.590293	0.047	0.068	1
Atad3a	0.0328175	-0.498657	0.056	0.078	1
Snx30	0.0328771	0.259944	0.281	0.244	1
Myef2	0.0328784	-0.404809	0.07	0.095	1
Pttg1	0.0329819	0.644258	0.042	0.027	1
Rffl	0.0330273	-0.324729	0.242	0.276	1
Mrps24	0.03331	0.629723	0.042	0.027	1
Arhgap32	0.0333534	-1.03727	0.017	0.031	1
Map7	0.0333863	-1.24344	0.005	0.013	1
Snrnp40	0.0334233	0.530805	0.069	0.049	1
Gstt2	0.0334697	0.717851	0.027	0.015	1
Gm48383	0.0334899	0.656858	0.049	0.032	1
Rgl3	0.0336155	-0.899207	0.021	0.036	1
Pard3	0.0337011	-0.67651	0.025	0.041	1
Vcpip1	0.0337695	-0.262766	0.251	0.289	1
Asap3	0.0337816	-2.45312	0.002	0.008	1
Rpl26	0.0337917	0.402517	0.137	0.109	1
Akt1s1	0.0339682	-0.556084	0.035	0.053	1
Atp6v1d	0.0340145	-0.409252	0.062	0.085	1
Stard5	0.0340682	-0.285691	0.158	0.191	1
Myo1e	0.0341262	0.310596	0.122	0.095	1
Ndufs7	0.0342639	0.556675	0.042	0.027	1
Egln2	0.0342774	-0.277014	0.036	0.054	1
Arpc1b	0.0343111	-0.315518	0.207	0.243	1
Dhrs1	0.0344657	0.570826	0.069	0.049	1
Gnpda1	0.0344965	0.372616	0.133	0.106	1
Trim47	0.0345732	0.255503	0.105	0.08	1
Stat3	0.0347214	-0.307875	0.249	0.285	1
Ankib1	0.0347628	-0.16922	0.221	0.263	1
Rb1	0.034796	0.255881	0.326	0.289	1
Ppp4c	0.0348736	-0.578259	0.057	0.078	1
Taf1d	0.0349117	-0.334497	0.121	0.151	1
Chrm3	0.0349917	-1.64893	0.007	0.016	1
Mrtfa	0.0350036	-0.179737	0.441	0.485	1
Nckap5	0.0350178	-1.36003	0.007	0.016	1
Mup17	0.0351093	0.542691	0.133	0.106	1
Egfl7	0.035221	-1.26105	0.008	0.018	1
Slc11a1	0.0353943	0.178672	0.473	0.435	1
Morf4l1	0.0354508	0.153762	0.34	0.297	1
Zmynd11	0.0355177	-0.220782	0.425	0.457	1
Junb	0.0355918	0.428486	0.079	0.058	1
Ilk	0.0356364	-0.509423	0.061	0.083	1
Cdc40	0.0358707	0.266733	0.195	0.163	1
Sh3pxd2a	0.035996	0.27891	0.181	0.149	1
Rmdn2	0.0360221	0.940885	0.037	0.023	1
Slc38a10	0.0360223	-0.383238	0.055	0.077	1
Ndufb4	0.0360497	0.560977	0.048	0.032	1
Gm30835	0.0360775	-4.20244	0	0.004	1
Ankrd33b	0.0360775	-4.63112	0	0.004	1
Sncaip	0.0360775	-5.00686	0	0.004	1
Smchd1	0.0361112	-0.111314	0.38	0.423	1
Lars	0.0361443	-0.385576	0.138	0.165	1
Pitpnb	0.0361965	-0.472223	0.066	0.089	1
Atat1	0.0362024	0.762711	0.039	0.024	1
Ctsd	0.0363375	-0.203507	0.307	0.353	1
Rab32	0.0363861	-0.252472	0.274	0.313	1
Arhgef3	0.0364438	-0.241198	0.286	0.321	1
Ambra1	0.0364664	-0.134755	0.553	0.585	1
Dpp3	0.0365155	-0.460272	0.049	0.07	1
Mpp1	0.0365272	0.332469	0.153	0.125	1
Crim1	0.0365715	-0.313456	0.216	0.25	1
4732465J04Rik	0.036572	-0.889543	0.008	0.018	1
Lpxn	0.0365776	0.252708	0.247	0.211	1
Fbxl4	0.0366827	-0.414694	0.099	0.126	1
Saysd1	0.036686	0.838602	0.045	0.03	1
Cep162	0.0368097	-0.410635	0.075	0.099	1
A630001G21Rik	0.0368397	-0.261027	0.201	0.235	1
Thrap3	0.0368791	0.234772	0.381	0.341	1
Ifih1	0.0368879	-0.333172	0.197	0.229	1
Jkamp	0.0370898	-0.890173	0.032	0.049	1
Ints3	0.037106	-0.513703	0.061	0.083	1
Ssbp1	0.0372185	-0.395424	0.065	0.087	1
Cep85l	0.037328	-0.255558	0.166	0.201	1
Stau2	0.037358	-0.383909	0.119	0.148	1
Lrch3	0.0374874	-0.209623	0.297	0.337	1
Galnt1	0.037701	0.23988	0.272	0.237	1
Calcrl	0.0378095	-0.421231	0.077	0.101	1
Dna2	0.0378264	1.90362	0.013	0.005	1
Rae1	0.0378823	0.474057	0.056	0.038	1
Ube2i	0.0379577	0.29287	0.122	0.096	1
Atp6v1g1	0.0379931	0.609836	0.08	0.059	1
Mlh3	0.0380465	-0.719526	0.037	0.054	1
Usp19	0.0381266	-0.379152	0.098	0.126	1
Syap1	0.0382338	0.474419	0.067	0.048	1
Rab8a	0.0382575	-0.545257	0.03	0.046	1
Parp9	0.0382843	-0.228416	0.274	0.308	1
Nup93	0.0383585	-0.315047	0.07	0.094	1
Ankrd40	0.0383955	-0.461202	0.051	0.072	1
BC028777	0.0384454	1.32552	0.013	0.005	1
Ube2v2	0.0384927	0.518731	0.127	0.103	1
Zfp622	0.0385737	-0.474462	0.027	0.043	1
Adhfe1	0.0385904	0.737799	0.045	0.03	1
Daam2	0.0386148	-3.14797	0.001	0.006	1
Prickle2	0.0386639	-2.80608	0.001	0.006	1
Actg1	0.0386654	0.315646	0.153	0.124	1
Atp6v0c	0.038674	0.28715	0.182	0.153	1
Pde3b	0.0387096	-0.467493	0.064	0.086	1
Retreg2	0.0388806	0.408211	0.039	0.025	1
Ucp2	0.0389186	0.147251	0.256	0.218	1
Nectin1	0.0389677	1.15883	0.013	0.005	1
Zc3h13	0.0390683	0.235444	0.206	0.173	1
Qk	0.0393055	0.112769	0.692	0.655	1
Gm28375	0.0393631	0.54354	0.084	0.063	1
Sh3kbp1	0.0394581	0.127788	0.606	0.57	1
Tlk1	0.0394649	-0.171023	0.425	0.458	1
Gm9968	0.0395458	0.748287	0.035	0.021	1
E230029C05Rik	0.039636	-0.113264	0.614	0.646	1
Ccdc174	0.0396536	-0.437149	0.053	0.074	1
Gm11714	0.0398139	0.563338	0.075	0.055	1
Foxq1	0.0398513	2.34387	0.008	0.002	1
4921511C10Rik	0.0398519	0.546348	0.054	0.037	1
Lrmp	0.0399119	-0.311161	0.265	0.296	1
Sharpin	0.039968	-0.651064	0.051	0.071	1
Smlr1	0.0400922	1.97105	0.008	0.002	1
Serf2	0.0403175	0.209623	0.164	0.134	1
Tpk1	0.0403231	-0.271969	0.133	0.164	1
Gm36975	0.040379	1.72224	0.013	0.006	1
Rusc2	0.0403827	0.39295	0.086	0.064	1
AI987944	0.0404202	-0.634244	0.037	0.054	1
Mpzl1	0.0404568	-0.297363	0.109	0.138	1
Clpb	0.0404589	-0.673583	0.047	0.066	1
Glt8d1	0.0405653	0.517457	0.097	0.075	1
Msl2	0.0405684	-0.270583	0.173	0.206	1
Taldo1	0.0405992	-0.329178	0.096	0.123	1
Dhx16	0.0406571	-0.593074	0.06	0.081	1
Erg28	0.0406593	0.919157	0.033	0.02	1
Adgrl2	0.0407039	-0.937204	0.021	0.035	1
Hjv	0.0407241	1.00237	0.008	0.002	1
Phf20	0.0407771	0.18695	0.351	0.313	1
Vrk2	0.0409187	-0.191179	0.64	0.656	1
Pcgf5	0.0409306	-0.637296	0.073	0.095	1
Cyp7a1	0.040968	1.58817	0.013	0.006	1
Prpsap2	0.0411105	0.346463	0.201	0.171	1
Hadh	0.0411242	0.717562	0.034	0.02	1
Mlec	0.0411537	0.596404	0.051	0.035	1
Fbxl3	0.0411699	-0.459329	0.138	0.165	1
Entpd5	0.0411716	0.788347	0.033	0.02	1
Dapk1	0.0412312	-0.0579327	0.768	0.817	1
5031425E22Rik	0.041263	0.296996	0.266	0.234	1
Uchl5	0.0412633	-0.349884	0.091	0.117	1
Mup14	0.0412827	1.18088	0.013	0.006	1
Erich1	0.0412899	0.418815	0.066	0.046	1
Mcmbp	0.0413871	0.242601	0.253	0.22	1
Nsun3	0.0414787	0.475135	0.059	0.041	1
Ccnk	0.0416049	-0.699272	0.031	0.047	1
Wdr43	0.0416913	-0.397365	0.128	0.156	1
E4f1	0.0416957	-0.426643	0.064	0.086	1
Ascc2	0.0418414	-0.275241	0.133	0.163	1
Acaa1a	0.0418683	-0.412038	0.06	0.082	1
Pex14	0.0419304	-0.281268	0.133	0.163	1
Tshz2	0.0419878	-1.0787	0.033	0.049	1
Tbxas1	0.0420127	-0.189549	0.556	0.585	1
Dgcr2	0.0420286	0.348382	0.081	0.06	1
Tef	0.0420814	0.689068	0.049	0.033	1
Mtg2	0.0420829	-0.616261	0.034	0.051	1
Zbtb34	0.0421246	-0.43395	0.105	0.131	1
Ube2g2	0.0421353	0.302021	0.085	0.063	1
Fam222b	0.0422323	-0.329	0.17	0.201	1
Plekhg3	0.0424144	-0.395303	0.096	0.122	1
Dcaf6	0.0424197	-0.301412	0.192	0.224	1
Pggt1b	0.0424366	0.262376	0.166	0.136	1
Ppp1r10	0.0424811	0.322938	0.135	0.108	1
Hal	0.0425358	0.582121	0.033	0.02	1
Rnf40	0.0425785	-0.765296	0.021	0.035	1
Creb3l3	0.0426825	0.694039	0.032	0.019	1
Gm19461	0.042745	5.00284	0.003	0	1
Sh2d3c	0.042745	4.60103	0.003	0	1
Pdgfra	0.042745	5.02388	0.003	0	1
Tmie	0.042745	3.92859	0.003	0	1
Thpo	0.042745	4.47234	0.003	0	1
Nrbf2	0.0427977	-0.463592	0.059	0.08	1
Pyroxd2	0.0429654	-0.292679	0.088	0.113	1
Bbox1	0.0430718	1.08681	0.014	0.006	1
Laptm4b	0.0432702	-0.905674	0.02	0.034	1
Stxbp1	0.0433973	-0.485688	0.037	0.054	1
Rsrc2	0.0434191	0.149639	0.337	0.299	1
Abat	0.0434915	1.0463	0.014	0.006	1
Met	0.0435019	-1.42306	0.004	0.011	1
Arfgef2	0.0435619	-0.243272	0.198	0.232	1
Tank	0.0436962	0.147745	0.364	0.326	1
Palmd	0.0437331	-1.26995	0.004	0.011	1
Tpm3	0.0437716	-0.185892	0.376	0.408	1
Stk19	0.043884	-0.4508	0.068	0.091	1
Bcl7a	0.0440284	0.796785	0.029	0.017	1
Elf2	0.0442425	0.172541	0.461	0.431	1
Elmod3	0.0442909	0.896077	0.029	0.017	1
Ly86	0.0444254	-0.1451	0.556	0.584	1
Arfip2	0.0444403	-0.410112	0.034	0.051	1
Copa	0.0444464	-0.177507	0.243	0.279	1
Zfp281	0.0444769	-0.5108	0.061	0.082	1
Dgkq	0.0444956	-0.696095	0.035	0.051	1
Tec	0.0445232	0.706623	0.048	0.032	1
Alg6	0.0445629	0.450897	0.051	0.035	1
Egfros	0.0447007	-1.75876	0.009	0.018	1
Mtmr6	0.044746	0.196083	0.229	0.195	1
Rabl3	0.0448906	-0.815846	0.016	0.029	1
Smarcd2	0.0449586	-0.487528	0.065	0.086	1
Rabl6	0.0449789	-0.36122	0.169	0.198	1
Stk10	0.0451048	-0.196826	0.409	0.445	1
Aida	0.0451058	-0.274736	0.087	0.112	1
Stx5a	0.0451665	-0.200433	0.197	0.232	1
Gm16023	0.0451715	1.28458	0.015	0.007	1
Glud1	0.045336	0.161219	0.351	0.313	1
Fam76b	0.0453816	0.30409	0.197	0.168	1
Zfp280c	0.045385	0.345704	0.104	0.08	1
Clptm1l	0.0454153	-0.341607	0.057	0.078	1
Adgrv1	0.0454464	-0.183142	0.069	0.093	1
Tmem63b	0.0454868	-0.559697	0.064	0.085	1
Rnf126	0.0455604	-0.373835	0.031	0.047	1
Clcn5	0.0455751	0.208726	0.29	0.257	1
Sema4g	0.0457022	-1.18802	0.014	0.026	1
Nr1i2	0.0457214	-1.14387	0.005	0.013	1
Nisch	0.0457387	-0.231327	0.383	0.413	1
Gm39214	0.0457423	0.914086	0.038	0.024	1
Mink1	0.0458028	0.287024	0.149	0.123	1
Btbd1	0.0458088	0.227348	0.285	0.253	1
Gm4952	0.0458554	0.608381	0.015	0.007	1
Sucla2	0.0458922	0.445438	0.098	0.076	1
Cerk	0.0458973	0.179863	0.336	0.299	1
St7l	0.0459013	0.254779	0.215	0.182	1
Ilrun	0.0459877	-0.304948	0.161	0.192	1
Cdyl	0.0460135	-0.352828	0.135	0.163	1
Zfp511	0.0462453	0.379453	0.065	0.046	1
Tmem65	0.0462687	0.141431	0.37	0.331	1
Zfp280d	0.0462738	-0.238235	0.266	0.301	1
Fads2	0.0464266	0.762504	0.039	0.025	1
Ufc1	0.0464632	0.797369	0.046	0.031	1
Ostm1	0.0464708	0.558101	0.071	0.052	1
Lpgat1	0.0464708	-0.287828	0.155	0.187	1
Pim3	0.0465133	0.66826	0.029	0.017	1
Dap3	0.046524	-0.734704	0.051	0.07	1
Serpinf1	0.0465604	0.833317	0.027	0.015	1
Greb1l	0.0467996	0.929774	0.016	0.008	1
Zfand2b	0.0468085	-0.970621	0.022	0.036	1
Adgrf5	0.0468145	-1.16689	0.008	0.017	1
Msra	0.0468203	-0.271005	0.122	0.151	1
Rps4x	0.0469055	0.483536	0.085	0.064	1
Ganab	0.046943	-0.386965	0.084	0.108	1
Plcg1	0.0469443	-1.26056	0.008	0.017	1
Med27	0.0470006	-0.326422	0.094	0.12	1
Gm16573	0.0470077	1.01563	0.016	0.008	1
Gm17494	0.0470251	1.31302	0.017	0.008	1
Uox	0.0470401	0.298541	0.133	0.107	1
Gm49961	0.0470704	1.26185	0.022	0.012	1
Trim33	0.0471275	-0.179966	0.226	0.263	1
Zdhhc18	0.0471982	-0.272293	0.066	0.088	1
Nmi	0.0472172	-0.412593	0.066	0.089	1
Cpped1	0.0473197	-0.249673	0.076	0.1	1
Robo2	0.0473762	-1.15083	0.006	0.014	1
Mrps9	0.0473767	-0.452496	0.111	0.137	1
Cluh	0.0473954	-0.706055	0.077	0.099	1
Cebpg	0.0474391	0.207845	0.264	0.23	1
Gys2	0.0475312	1.06957	0.017	0.008	1
Utp25	0.0475416	-0.637718	0.038	0.055	1
AW554918	0.0476222	0.21232	0.293	0.256	1
Tgoln1	0.0476381	0.628635	0.058	0.041	1
Aldh5a1	0.0479373	1.91417	0.009	0.003	1
Elf1	0.0479775	-0.151091	0.335	0.373	1
Nsmce2	0.0480134	0.161264	0.449	0.418	1
Tmem256	0.0480722	0.777756	0.038	0.024	1
Lcp2	0.0481314	-0.137332	0.639	0.645	1
Map3k5	0.0481416	-0.176722	0.469	0.499	1
Ppib	0.0481544	0.554223	0.083	0.062	1
Paqr9	0.0481605	-0.248063	0.339	0.371	1
Gcdh	0.0482527	0.630895	0.039	0.025	1
Ccn2	0.0483002	1.52757	0.009	0.003	1
Sec24d	0.0483074	0.235817	0.2	0.169	1
Arpc3	0.0483321	0.37089	0.123	0.099	1
Mastl	0.0484071	0.92096	0.019	0.01	1
Foxk1	0.0484151	0.325047	0.099	0.076	1
F12	0.0484976	0.373155	0.027	0.015	1
Rfx1	0.0485574	-0.654134	0.028	0.043	1
Golph3	0.0485863	-0.437909	0.078	0.101	1
Ppara	0.0486543	-0.776241	0.018	0.031	1
Nr3c1	0.048721	0.097145	0.581	0.543	1
Hadha	0.048927	-0.361541	0.074	0.097	1
Tceanc2	0.0490704	-0.394154	0.079	0.102	1
Dnajc7	0.0491825	-0.23084	0.325	0.359	1
Aox3	0.0492752	-0.390395	0.064	0.085	1
Top3b	0.0492882	-0.336546	0.085	0.109	1
Satb2	0.0495337	-0.55871	0.028	0.043	1
Cep57	0.0496127	-0.614636	0.031	0.046	1
H3f3b	0.0496949	0.256583	0.255	0.222	1
Khnyn	0.0497146	0.423907	0.071	0.052	1
Pgpep1	0.0497277	0.58041	0.022	0.012	1
2610008E11Rik	0.0497483	-0.459154	0.033	0.049	1
Taok2	0.0497972	-0.31838	0.085	0.109	1
Galk2	0.0498692	0.221576	0.232	0.198	1
Scmh1	0.0499125	-0.282242	0.243	0.275	1
Gm47465	0.0499351	-1.31727	0.002	0.008	1
Fbxw5	0.0501116	-0.457911	0.058	0.078	1
Ccdc88a	0.0501848	0.147219	0.373	0.335	1
Stk25	0.0502641	-0.37643	0.086	0.11	1
Zfp597	0.0505116	-0.654541	0.034	0.05	1
2005-03-01	0.0506371	-0.12932	0.155	0.187	1
Ilf2	0.0506938	-0.770655	0.033	0.049	1
Zbtb7b	0.0507562	-0.580844	0.028	0.043	1
Brd1	0.0508508	0.26038	0.214	0.184	1
Brd9	0.0512145	-0.276165	0.126	0.154	1
Gm4951	0.0512631	-0.144299	0.564	0.594	1
Hes1	0.0514068	-0.56472	0.058	0.077	1
Ly96	0.0514767	0.25184	0.17	0.14	1
Dpm1	0.0515546	0.365986	0.105	0.082	1
Cltc	0.0516207	0.168528	0.482	0.436	1
Chkb	0.0516956	-0.289182	0.104	0.13	1
Eps15	0.0517544	0.220515	0.329	0.298	1
Paip2	0.0518414	0.175251	0.138	0.111	1
Wdr1	0.0518591	-0.423159	0.087	0.111	1
Fbxw11	0.0518858	-0.185508	0.287	0.32	1
Lrch1	0.0520915	-0.172493	0.431	0.466	1
Slc17a5	0.0521056	0.263063	0.173	0.146	1
Cyp2c29	0.0523249	0.38381	0.136	0.11	1
Nat8f1	0.0523501	0.656854	0.035	0.022	1
Ctsa	0.0524605	-0.195949	0.322	0.356	1
Cnst	0.0527377	-0.540644	0.031	0.046	1
Mta1	0.0527398	-0.574797	0.045	0.063	1
Rara	0.0528243	-0.62113	0.052	0.071	1
Anapc2	0.0530168	-0.481909	0.052	0.071	1
Asah1	0.0530839	0.191278	0.411	0.376	1
Gfm1	0.0531043	0.658103	0.06	0.043	1
Zfc3h1	0.0535596	0.149004	0.434	0.406	1
Tpr	0.053589	0.116816	0.422	0.375	1
Col4a2	0.0538225	2.26546	0.01	0.004	1
Cemip2	0.0538783	-0.363113	0.077	0.1	1
Hnrnpul2	0.053927	-0.22103	0.13	0.159	1
Lgals9	0.0539631	0.268703	0.16	0.132	1
Vti1a	0.0539714	-0.169305	0.575	0.601	1
Trp53bp1	0.0539805	-0.339716	0.085	0.108	1
Fip1l1	0.0539876	-0.292275	0.194	0.227	1
Prr13	0.0540094	0.440435	0.112	0.089	1
Gm38604	0.0540989	0.734809	0.054	0.038	1
Mon1a	0.0542145	-0.750925	0.041	0.058	1
Kif1bp	0.0542275	-0.610216	0.03	0.045	1
Wdr91	0.054502	-0.441603	0.048	0.067	1
Ddx55	0.0545406	0.269804	0.089	0.067	1
Hmgb1	0.0545536	0.298663	0.127	0.102	1
Clec14a	0.0546229	1.49045	0.01	0.004	1
2610203C22Rik	0.0546412	0.143369	0.153	0.125	1
Rap1b	0.0547141	-0.152492	0.585	0.62	1
Kcnrg	0.0548735	0.285206	0.129	0.104	1
Tmbim6	0.0551573	0.238888	0.234	0.205	1
Cald1	0.0552188	0.487657	0.077	0.058	1
Casp12	0.055244	0.62524	0.042	0.028	1
Mzt1	0.0554618	0.366756	0.076	0.057	1
Fndc3a	0.0555895	0.108709	0.646	0.606	1
Gpr39	0.0557512	-4.88745	0	0.004	1
Ttll7	0.0557512	-4.76475	0	0.004	1
Sema3d	0.0557512	-4.28661	0	0.004	1
Gas7	0.0557512	-4.47157	0	0.004	1
Gm31333	0.0557512	-4.02077	0	0.004	1
Gm30117	0.0557512	-4.59784	0	0.004	1
Zfp952	0.0559474	-0.675586	0.034	0.049	1
Suclg1	0.0559657	0.479783	0.063	0.045	1
Pck1	0.0560799	0.249134	0.144	0.117	1
Eif4enif1	0.056114	-0.285491	0.09	0.114	1
Trmt1l	0.0561813	-0.356476	0.14	0.166	1
Traf3	0.0562214	-0.288378	0.157	0.187	1
Rhbdd3	0.0564241	-0.567029	0.037	0.053	1
Slc15a4	0.0566011	-0.420134	0.073	0.095	1
Kyat3	0.0566685	-0.618437	0.029	0.044	1
Uroc1	0.0570111	-0.873706	0.011	0.02	1
Nup35	0.0570632	-0.662688	0.016	0.028	1
Yars	0.0571649	-0.307065	0.047	0.065	1
Myh9	0.0572413	-0.281544	0.193	0.223	1
Lgmn	0.0572515	-0.114153	0.742	0.77	1
Diaph2	0.0576127	-0.0801038	0.762	0.777	1
Proc	0.0576422	0.766944	0.031	0.019	1
Mcur1	0.0576756	-0.728624	0.038	0.054	1
2610035D17Rik	0.0578516	0.280808	0.089	0.068	1
Nop10	0.0580348	0.739175	0.039	0.026	1
Rad23a	0.0581238	0.510626	0.048	0.033	1
Ddrgk1	0.0581515	-0.438581	0.08	0.102	1
Ttc6	0.058156	-2.79386	0.001	0.006	1
Adam19	0.0582289	-3.03303	0.001	0.006	1
Adam12	0.058302	-2.60423	0.001	0.006	1
Mapt	0.058302	-2.81282	0.001	0.006	1
Coro2b	0.0583751	-2.56846	0.001	0.006	1
Lipa	0.0584311	0.189332	0.318	0.285	1
Kctd9	0.0584787	-0.451578	0.044	0.062	1
Sdf4	0.0587112	0.396252	0.083	0.063	1
Ctdp1	0.0588048	-0.572531	0.05	0.068	1
Tex10	0.0588399	0.184362	0.134	0.108	1
Tm6sf1	0.0588466	0.118449	0.413	0.378	1
Bnip2	0.058917	0.104175	0.24	0.206	1
Pkd1	0.0590525	-0.48322	0.099	0.122	1
Gpd1	0.0590562	0.644844	0.031	0.019	1
Arhgap35	0.059158	-0.297171	0.109	0.135	1
Magt1	0.0594183	0.22784	0.197	0.165	1
Aoah	0.0595058	0.131595	0.6	0.552	1
1110038F14Rik	0.059518	-0.541959	0.034	0.049	1
Hacd1	0.0595409	1.56492	0.011	0.004	1
Med13	0.0596798	0.146994	0.406	0.37	1
3110056K07Rik	0.059696	0.356759	0.133	0.109	1
Ralb	0.0599246	-0.383431	0.085	0.107	1
St6gal1	0.0600426	0.25274	0.349	0.317	1
Gja1	0.0601694	2.32039	0.006	0.001	1
Mtch1	0.060291	-0.493232	0.05	0.068	1
Rtf2	0.0602955	-0.356858	0.032	0.047	1
Ccdc191	0.0603206	0.312138	0.111	0.088	1
Phf10	0.0603221	-0.414199	0.086	0.108	1
Btnl9	0.0603287	1.70357	0.006	0.001	1
Smg6	0.0604062	-0.217716	0.398	0.427	1
[truncated: 5,946 more rows]

## Sheet: DEGs_KCs_MP_vs_Ctrl
	p_val	avg_log2FC	pct.1	pct.2	p_val_adj
Alb	2.47838e-155	1.89648	0.929	0.568	1.96907e-151
Malat1	5.19019e-130	0.574962	1	1	4.1236e-126
Fabp1	2.47685e-94	1.66094	0.715	0.341	1.96785e-90
Zdhhc14	1.68173e-84	-1.24217	0.698	0.869	1.33613e-80
Ttr	1.68678e-68	1.73064	0.598	0.27	1.34015e-64
Apoa2	1.81474e-67	1.48436	0.71	0.422	1.44181e-63
Apoe	4.93909e-63	1.00465	0.914	0.738	3.92411e-59
Rin2	2.27688e-57	-1.51254	0.411	0.649	1.80898e-53
Mup20	9.92308e-54	1.3477	0.691	0.429	7.88389e-50
Mup3	2.94287e-51	1.4445	0.626	0.36	2.33811e-47
Itga9	5.88226e-48	-0.622805	0.847	0.932	4.67346e-44
Lepr	9.03432e-47	-2.34832	0.099	0.344	7.17777e-43
Ccr5	1.9038e-45	1.32545	0.605	0.362	1.51257e-41
Abca1	4.6883e-44	-0.91818	0.6	0.765	3.72485e-40
Cyp7b1	1.08033e-42	-2.16591	0.066	0.287	8.58324e-39
Apoa1	2.4309e-41	1.45541	0.508	0.261	1.93135e-37
Mgst1	3.7542e-39	1.54049	0.407	0.178	2.98271e-35
Pitpnc1	4.40378e-39	-0.608666	0.847	0.936	3.4988e-35
Man2a1	1.15454e-37	-0.938481	0.533	0.711	9.1728e-34
Scd1	1.4728e-37	1.90505	0.307	0.106	1.17014e-33
Rbp4	4.11216e-36	1.61289	0.339	0.133	3.26711e-32
Uvrag	2.852e-35	-0.73907	0.678	0.81	2.26592e-31
Ifi203	2.99769e-35	0.805403	0.729	0.532	2.38166e-31
Etv6	3.50117e-34	-0.718338	0.674	0.807	2.78168e-30
Pkp4	4.45258e-32	-0.81585	0.528	0.72	3.53757e-28
Phlpp1	8.27751e-32	-1.43338	0.207	0.417	6.57648e-28
Ext1	8.34319e-31	-0.87223	0.554	0.711	6.62867e-27
Gm26917	1.22966e-29	-1.04389	0.365	0.568	9.76963e-26
Serpina1c	4.74018e-29	1.35616	0.394	0.201	3.76608e-25
Serpina1b	5.47929e-28	1.67813	0.244	0.083	4.35329e-24
Ifi204	2.03587e-27	0.7759	0.648	0.456	1.61749e-23
Trim25	2.53995e-26	-1.00335	0.36	0.545	2.01799e-22
Trf	2.68416e-26	0.996472	0.541	0.348	2.13257e-22
Tcirg1	3.37197e-26	-0.867881	0.458	0.628	2.67903e-22
Selenop	6.97637e-26	1.02453	0.457	0.265	5.54273e-22
Tmsb4x	1.01587e-25	0.734995	0.676	0.494	8.07106e-22
Txnip	4.81161e-25	1.21957	0.357	0.179	3.82282e-21
Camk1d	6.03949e-25	-0.3729	0.954	0.978	4.79838e-21
Ctsc	1.21057e-24	0.710792	0.831	0.731	9.61796e-21
Fgg	2.0954e-24	1.43127	0.258	0.103	1.6648e-20
Egfr	2.3673e-24	-1.54072	0.132	0.304	1.88082e-20
Hpgd	4.75299e-23	0.582204	0.804	0.693	3.77625e-19
Frmd4b	1.28478e-22	-0.323535	0.97	0.982	1.02075e-18
Car3	2.98109e-22	1.69526	0.196	0.068	2.36848e-18
Thrb	1.43583e-21	-0.587124	0.678	0.787	1.14077e-17
Apoc3	1.64399e-21	1.10003	0.332	0.168	1.30615e-17
Fkbp5	3.47806e-21	-0.733203	0.491	0.648	2.76332e-17
F630028O10Rik	3.67595e-21	0.929174	0.495	0.327	2.92054e-17
Serpina1a	3.90713e-21	1.48184	0.216	0.083	3.10422e-17
Dbi	3.70918e-20	1.52428	0.206	0.08	2.94694e-16
Csf2ra	4.10061e-20	0.830728	0.46	0.293	3.25794e-16
Fgb	5.7252e-20	1.21903	0.296	0.149	4.54867e-16
Taco1	2.40427e-19	-1.68015	0.068	0.195	1.91019e-15
Arhgap15	2.62716e-19	-0.459732	0.752	0.819	2.08728e-15
App	3.0403e-19	-0.713331	0.445	0.604	2.41552e-15
Apoc1	5.54031e-19	0.709905	0.665	0.523	4.40178e-15
Eepd1	1.60896e-18	-1.33653	0.132	0.273	1.27832e-14
Actb	1.67595e-18	0.713896	0.573	0.41	1.33154e-14
Abr	2.30627e-18	-0.615731	0.62	0.723	1.83233e-14
Ahsg	2.43252e-18	1.20654	0.271	0.133	1.93264e-14
Nrip1	2.64533e-18	-0.82795	0.387	0.546	2.10171e-14
Mndal	3.93657e-18	0.52291	0.795	0.675	3.1276e-14
Hivep2	5.87895e-18	-1.00815	0.296	0.445	4.67082e-14
Cyth4	3.33573e-17	-0.863156	0.315	0.463	2.65024e-13
H2-Aa	1.53371e-16	0.839782	0.435	0.289	1.21854e-12
Nfxl1	1.61435e-16	0.693521	0.514	0.36	1.2826e-12
Pde7b	2.36211e-16	-0.465579	0.848	0.89	1.87669e-12
Ptprj	2.80494e-16	-0.287709	0.964	0.977	2.22853e-12
Gab2	3.1239e-16	-0.343049	0.896	0.931	2.48194e-12
Apoh	3.54492e-16	1.54654	0.146	0.051	2.81644e-12
Cyp2e1	3.91918e-16	1.18312	0.262	0.135	3.11379e-12
Zfp36l1	4.31696e-16	1.01146	0.304	0.168	3.42983e-12
Trps1	6.75046e-16	-0.651864	0.585	0.694	5.36324e-12
Pik3r1	8.3152e-16	-0.524929	0.599	0.704	6.60643e-12
Sat1	8.3797e-16	0.460121	0.842	0.746	6.65767e-12
Vcam1	1.43758e-15	0.659466	0.498	0.343	1.14216e-11
H3f3b	1.61426e-15	0.824911	0.368	0.222	1.28253e-11
Gnaq	3.02234e-15	-0.347661	0.817	0.89	2.40125e-11
H2-D1	3.31758e-15	0.60077	0.6	0.458	2.63582e-11
Maf	4.45019e-15	0.415626	0.808	0.723	3.53568e-11
Mafb	4.86911e-15	0.748428	0.434	0.289	3.86851e-11
Gc	5.26292e-15	1.13211	0.272	0.146	4.18139e-11
Fnip2	5.66867e-15	-0.832988	0.255	0.398	4.50376e-11
Jdp2	8.031e-15	-0.852975	0.246	0.385	6.38063e-11
mt-Co1	1.30977e-14	0.570925	0.697	0.587	1.04061e-10
Cyp3a11	1.79535e-14	1.66025	0.119	0.037	1.42641e-10
Timd4	3.07043e-14	-0.470371	0.641	0.738	2.43945e-10
Cd5l	3.94224e-14	0.330547	0.925	0.867	3.13211e-10
Gstm1	4.48949e-14	1.48856	0.143	0.055	3.5669e-10
Hamp	8.86491e-14	1.13493	0.191	0.089	7.04317e-10
Eef1a1	3.39086e-13	0.708067	0.404	0.27	2.69404e-09
Apoc4	3.76904e-13	1.37956	0.16	0.069	2.9945e-09
Serpina3k	4.3709e-13	0.700142	0.439	0.299	3.47268e-09
Slc40a1	5.59957e-13	0.268415	0.955	0.932	4.44886e-09
Lrmda	9.47664e-13	-0.315837	0.902	0.939	7.52919e-09
B2m	9.965e-13	0.640919	0.468	0.335	7.91719e-09
Tdo2	1.39406e-12	0.933846	0.224	0.117	1.10758e-08
Pde8a	1.60615e-12	-0.639606	0.387	0.505	1.27609e-08
Snx5	2.90145e-12	0.524638	0.578	0.458	2.3052e-08
Gm20275	2.93405e-12	0.62337	0.483	0.359	2.3311e-08
Mef2a	3.9952e-12	0.279632	0.912	0.894	3.17419e-08
Cth	4.49585e-12	1.99578	0.073	0.017	3.57195e-08
Id3	5.61181e-12	0.893275	0.253	0.143	4.45858e-08
Acaa1b	6.19004e-12	1.37048	0.13	0.052	4.91799e-08
Serpina1e	6.4013e-12	0.797911	0.322	0.201	5.08583e-08
Arrb2	6.73712e-12	-0.495859	0.498	0.613	5.35264e-08
C1qa	7.64974e-12	0.537199	0.52	0.389	6.07772e-08
Trpm2	7.7452e-12	-0.387568	0.627	0.722	6.15356e-08
Pck1	9.82631e-12	1.00671	0.218	0.117	7.80701e-08
Lrp1	1.15896e-11	-0.410794	0.675	0.742	9.20795e-08
Wdfy3	1.17854e-11	-0.278229	0.878	0.923	9.36354e-08
Stk10	1.3438e-11	-0.688436	0.325	0.445	1.06765e-07
Oaz1	1.36865e-11	1.19401	0.179	0.089	1.08739e-07
Abca9	2.054e-11	0.594379	0.513	0.399	1.6319e-07
AW112010	2.2839e-11	0.826235	0.244	0.14	1.81456e-07
Ctsl	2.5197e-11	1.22257	0.141	0.061	2.0019e-07
Sema6d	4.31853e-11	-0.376121	0.738	0.798	3.43108e-07
Ces1c	9.25962e-11	1.51055	0.1	0.036	7.35677e-07
Dapk1	9.47354e-11	-0.32227	0.733	0.817	7.52673e-07
C1qc	1.23563e-10	0.514064	0.488	0.363	9.81708e-07
Ndufa4	1.27699e-10	1.3422	0.12	0.049	1.01457e-06
Cd44	1.40463e-10	-0.427441	0.689	0.749	1.11598e-06
Ubc	1.45467e-10	0.839829	0.235	0.136	1.15574e-06
Serpina1d	1.76361e-10	1.20721	0.141	0.065	1.40119e-06
Pgrmc1	1.80618e-10	1.22269	0.134	0.059	1.43501e-06
A330023F24Rik	1.83263e-10	-0.683321	0.245	0.361	1.45603e-06
Ttc39c	1.86565e-10	-1.05701	0.104	0.199	1.48226e-06
Wfdc21	2.32892e-10	1.64776	0.093	0.032	1.85033e-06
Ncoa1	2.55591e-10	-0.444791	0.525	0.639	2.03067e-06
Rgl1	2.9012e-10	-0.339542	0.7	0.761	2.305e-06
Madd	3.51795e-10	0.464331	0.62	0.518	2.79501e-06
Clec4f	3.94133e-10	-0.213236	0.971	0.974	3.13139e-06
Gm26740	4.22516e-10	-0.396575	0.571	0.67	3.35689e-06
Fmnl2	4.77625e-10	-0.289758	0.913	0.937	3.79473e-06
Apob	5.0733e-10	0.914053	0.274	0.174	4.03074e-06
Stab1	5.83593e-10	-0.933836	0.138	0.236	4.63664e-06
Hpcal1	6.0871e-10	-0.511349	0.518	0.6	4.8362e-06
Bcl2l1	6.67741e-10	-1.01429	0.101	0.192	5.3052e-06
Ubb	6.78924e-10	1.1846	0.154	0.077	5.39405e-06
Mrtfa	9.20432e-10	-0.586585	0.38	0.485	7.31283e-06
Btbd11	9.94717e-10	-0.530642	0.535	0.606	7.90302e-06
Dhx40	1.02007e-09	1.34735	0.2	0.115	8.10449e-06
St3gal4	1.13935e-09	-0.356569	0.689	0.77	9.0521e-06
Gm42418	1.24871e-09	-0.226708	0.972	0.985	9.92104e-06
Adh1	1.28811e-09	1.48157	0.093	0.035	1.0234e-05
Ddt	1.39381e-09	1.74268	0.081	0.027	1.10738e-05
Azgp1	1.46513e-09	1.28304	0.112	0.047	1.16405e-05
Plekhm2	1.5661e-09	-0.503638	0.422	0.525	1.24426e-05
Vsig4	1.57529e-09	0.342332	0.803	0.751	1.25157e-05
Wipf1	1.63565e-09	-0.440736	0.601	0.675	1.29952e-05
C3	1.65742e-09	0.813646	0.216	0.125	1.31682e-05
H2-Q10	1.67754e-09	1.07863	0.186	0.103	1.33281e-05
Kng1	1.98561e-09	1.17226	0.125	0.056	1.57756e-05
Gm12353	1.98583e-09	0.87216	0.218	0.129	1.57775e-05
Rps14	1.98818e-09	1.00918	0.17	0.09	1.57961e-05
Ass1	2.64581e-09	0.961087	0.155	0.079	2.1021e-05
Cmip	2.91131e-09	-0.362369	0.601	0.696	2.31303e-05
Rplp2	2.95776e-09	1.14882	0.142	0.07	2.34994e-05
Samd9l	3.09367e-09	0.446492	0.393	0.279	2.45792e-05
Dock4	3.76952e-09	-0.263457	0.907	0.939	2.99488e-05
Tat	3.93507e-09	0.901901	0.18	0.099	3.12641e-05
Glul	4.05196e-09	0.742561	0.246	0.151	3.21928e-05
Prdx1	4.36684e-09	0.647358	0.314	0.212	3.46945e-05
Klra2	4.7075e-09	0.355361	0.692	0.591	3.74011e-05
Rsrp1	5.07861e-09	0.281492	0.893	0.82	4.03495e-05
Macf1	5.87185e-09	-0.215516	0.945	0.954	4.66519e-05
Abcc3	6.52413e-09	-0.493689	0.455	0.561	5.18342e-05
Srsf5	7.70162e-09	0.404608	0.661	0.558	6.11894e-05
Tpt1	7.8483e-09	0.690368	0.268	0.173	6.23547e-05
Zfp36l2	7.91914e-09	0.728971	0.334	0.24	6.29176e-05
Elovl2	8.29899e-09	1.79287	0.07	0.023	6.59355e-05
Cdo1	8.9402e-09	1.03164	0.153	0.08	7.10299e-05
Rps27a	9.0207e-09	0.86941	0.184	0.104	7.16695e-05
A930037H05Rik	9.03869e-09	0.847025	0.26	0.17	7.18124e-05
Bhmt	9.84023e-09	1.27726	0.111	0.049	7.81806e-05
Itm2b	1.1881e-08	0.399703	0.6	0.51	9.43949e-05
Cyp2c29	1.26643e-08	0.976809	0.19	0.11	0.000100618
Slc8b1	1.3363e-08	-0.509156	0.359	0.468	0.000106169
Cd164	1.52517e-08	0.625389	0.296	0.201	0.000121175
Ugt2b5	1.60476e-08	1.30096	0.097	0.04	0.000127498
Plg	1.60547e-08	1.29743	0.118	0.056	0.000127555
Cfp	1.62458e-08	-0.555583	0.354	0.454	0.000129073
Chchd2	1.6315e-08	1.13756	0.133	0.066	0.000129623
Chchd10	1.66363e-08	1.32487	0.098	0.042	0.000132176
H2afj	2.27392e-08	0.678069	0.238	0.149	0.000180663
Dip2c	2.37956e-08	-0.291974	0.783	0.83	0.000189056
Sik3	2.39744e-08	-0.609308	0.239	0.338	0.000190476
Sephs2	2.45761e-08	1.2027	0.105	0.046	0.000195257
Herpud1	2.71858e-08	0.852051	0.179	0.102	0.000215991
Pik3cb	2.9022e-08	-0.665171	0.185	0.281	0.00023058
Zbtb20	2.94597e-08	-0.208371	0.904	0.925	0.000234057
Rpl15	2.96056e-08	1.22317	0.11	0.051	0.000235217
Ifitm3	3.15068e-08	0.865674	0.186	0.109	0.000250321
Fth1	3.45214e-08	0.544007	0.308	0.209	0.000274273
Gsta3	3.68291e-08	1.17239	0.117	0.056	0.000292607
Hmgcs1	4.38045e-08	1.47798	0.081	0.032	0.000348026
Mif	4.97751e-08	2.32097	0.044	0.01	0.000395463
mt-Cytb	5.00535e-08	0.628099	0.309	0.212	0.000397675
Prpf4b	5.09049e-08	0.460189	0.467	0.364	0.00040444
Zeb2	5.18035e-08	0.201863	0.977	0.977	0.000411579
Gpx1	5.46436e-08	0.573137	0.358	0.26	0.000434144
Zfand3	5.70849e-08	-0.289291	0.692	0.767	0.000453539
Ccdc152	6.03763e-08	1.42346	0.076	0.029	0.00047969
mt-Atp6	7.19904e-08	0.545871	0.4	0.3	0.000571963
Cyp2d10	7.6074e-08	1.51453	0.075	0.028	0.000604408
Igfbp2	7.64536e-08	2.22077	0.042	0.009	0.000607424
Hprt	7.99772e-08	0.648468	0.227	0.141	0.000635419
Ifi213	8.62232e-08	0.473276	0.398	0.298	0.000685043
Marcks	9.9365e-08	0.411593	0.486	0.377	0.000789455
Akr1c6	1.00157e-07	1.06523	0.116	0.056	0.00079575
Ddx5	1.05879e-07	0.214763	0.945	0.908	0.000841211
Msr1	1.09774e-07	0.334705	0.75	0.68	0.000872158
Sipa1l1	1.16558e-07	-0.53226	0.31	0.405	0.000926056
Mup11	1.21925e-07	0.965276	0.216	0.139	0.000968692
Pde4b	1.27865e-07	-0.730502	0.138	0.221	0.00101589
H2-T23	1.34295e-07	0.888525	0.165	0.095	0.00106697
Ambp	1.52775e-07	0.991837	0.122	0.061	0.0012138
Cyp2d9	1.63741e-07	1.28669	0.098	0.044	0.00130092
Clec1a	1.69855e-07	0.663221	0.244	0.159	0.0013495
E230029C05Rik	1.7626e-07	-0.330971	0.559	0.646	0.00140038
Gphn	1.99061e-07	-0.303553	0.638	0.725	0.00158154
mt-Nd4	2.02501e-07	0.634124	0.239	0.155	0.00160887
Ksr2	2.12534e-07	-0.399208	0.518	0.602	0.00168858
Son	2.21956e-07	0.30468	0.693	0.599	0.00176344
Ankrd44	2.25999e-07	-0.424597	0.456	0.544	0.00179557
C8g	2.27423e-07	1.42536	0.072	0.027	0.00180687
Iigp1	2.32902e-07	0.65837	0.342	0.255	0.00185041
Sppl2a	2.37228e-07	0.458648	0.449	0.361	0.00188478
Plxna4	2.46013e-07	-0.638467	0.16	0.244	0.00195457
Gnmt	2.46504e-07	0.899907	0.135	0.071	0.00195847
Cybb	3.04961e-07	0.372447	0.542	0.458	0.00242292
Hspa5	3.13483e-07	0.689217	0.301	0.215	0.00249062
Stk17b	3.20239e-07	-0.437289	0.485	0.557	0.0025443
mt-Nd2	3.22311e-07	0.762342	0.23	0.152	0.00256076
Lysmd4	3.51495e-07	0.588113	0.376	0.294	0.00279263
Cd38	3.65115e-07	-0.422051	0.535	0.601	0.00290084
Spag9	3.88057e-07	-0.398661	0.554	0.614	0.00308311
Neat1	3.99579e-07	-0.225103	0.755	0.809	0.00317466
Uqcrq	4.23146e-07	1.15139	0.14	0.079	0.00336189
Celf2	4.4168e-07	-0.295024	0.768	0.807	0.00350915
Otc	4.5383e-07	1.67327	0.055	0.018	0.00360568
Grb2	4.54903e-07	-0.319656	0.564	0.635	0.00361421
Cd48	5.15579e-07	0.495424	0.36	0.272	0.00409627
Rps23	5.17082e-07	0.802155	0.146	0.082	0.00410821
Txnrd1	5.20996e-07	-0.680064	0.147	0.229	0.00413931
Dip2b	5.25717e-07	-0.335103	0.531	0.604	0.00417682
Gm10800	5.362e-07	-1.3526	0.037	0.088	0.00426011
Itgal	5.96861e-07	0.478315	0.469	0.375	0.00474206
Abl2	6.02293e-07	-0.449012	0.359	0.447	0.00478522
Svil	6.11871e-07	-0.602315	0.274	0.362	0.00486132
Fcer1g	6.28367e-07	0.454444	0.362	0.269	0.00499238
Maml3	6.45281e-07	-0.624327	0.261	0.346	0.00512676
Rpl36al	7.42641e-07	0.802206	0.142	0.08	0.00590028
Gadd45g	7.54677e-07	1.07834	0.133	0.073	0.00599591
Slc25a3	8.29333e-07	0.6358	0.268	0.186	0.00658905
Rps9	8.3008e-07	0.701624	0.241	0.163	0.00659499
Mat1a	8.74193e-07	1.05095	0.121	0.065	0.00694547
Manf	9.33068e-07	0.852508	0.141	0.079	0.00741323
Hnrnpa2b1	9.81683e-07	0.272463	0.646	0.552	0.00779947
Sgms1	1.06878e-06	-0.691945	0.173	0.252	0.00849146
Slc38a4	1.06885e-06	0.857072	0.11	0.056	0.008492
Klf2	1.15826e-06	0.564485	0.215	0.139	0.00920241
Hpx	1.2602e-06	0.783283	0.188	0.12	0.0100123
Slc16a10	1.33723e-06	-0.428782	0.395	0.48	0.0106243
Clec2d	1.36133e-06	0.470981	0.388	0.298	0.0108158
Rin3	1.51847e-06	-0.769044	0.149	0.223	0.0120643
Cd81	1.57245e-06	0.53128	0.262	0.182	0.0124931
Slco1b2	1.57302e-06	0.87757	0.172	0.107	0.0124977
Capza2	1.7516e-06	0.324659	0.537	0.43	0.0139165
Gm47283	2.18427e-06	0.324195	0.685	0.619	0.017354
Prpf38b	2.18445e-06	0.412279	0.459	0.375	0.0173555
Gm13684	2.28816e-06	0.98775	0.141	0.082	0.0181795
Ubr4	2.35082e-06	-0.572023	0.174	0.254	0.0186773
Hmgcs2	2.50647e-06	0.750689	0.163	0.1	0.0199139
Entr1	2.53225e-06	-0.832952	0.089	0.152	0.0201187
Cox5a	2.56925e-06	0.709397	0.133	0.075	0.0204127
Rarres2	2.57085e-06	1.72569	0.054	0.02	0.0204254
Slc29a1	2.60417e-06	0.448544	0.358	0.267	0.0206901
Rcsd1	2.60912e-06	-0.565496	0.304	0.382	0.0207294
Ly86	2.69864e-06	-0.340146	0.495	0.584	0.0214407
Top1	2.73592e-06	0.292706	0.565	0.463	0.0217369
Cat	3.07379e-06	0.47792	0.265	0.186	0.0244213
Gsr	3.28792e-06	-0.510996	0.29	0.371	0.0261225
Vps9d1	3.29643e-06	1.0421	0.094	0.046	0.0261902
Brip1os	3.38937e-06	0.631536	0.172	0.106	0.0269285
Fdps	3.59419e-06	1.78405	0.046	0.015	0.0285559
Dysf	3.64746e-06	-0.277269	0.579	0.649	0.0289791
Aldob	3.73416e-06	0.477929	0.237	0.157	0.0296679
H2afz	3.75378e-06	0.890486	0.113	0.061	0.0298238
Hps3	3.76665e-06	0.453811	0.433	0.356	0.029926
Rida	3.83565e-06	1.0274	0.097	0.049	0.0304742
Slc25a5	3.86826e-06	1.14369	0.082	0.039	0.0307334
Cfh	4.00465e-06	0.307643	0.646	0.584	0.031817
Lgmn	4.10218e-06	-0.274006	0.702	0.77	0.0325918
Cerk	4.49932e-06	-0.570934	0.221	0.299	0.0357471
Cyth1	4.53004e-06	-0.376335	0.424	0.505	0.0359912
Gda	4.61191e-06	-2.41297	0.011	0.043	0.0366416
Foxp1	4.64841e-06	-0.365562	0.565	0.62	0.0369316
Tubb2a	4.86235e-06	1.99116	0.039	0.011	0.0386314
Eif1	4.91604e-06	0.657506	0.185	0.12	0.039058
Ttc36	4.91644e-06	1.23213	0.087	0.043	0.0390611
Pten	5.10398e-06	0.294009	0.706	0.639	0.0405511
2510009E07Rik	5.14134e-06	-0.451524	0.357	0.432	0.040848
Arfgap1	5.23193e-06	-0.907617	0.055	0.108	0.0415677
Mpzl1	5.32283e-06	-0.89377	0.079	0.138	0.0422899
AY036118	5.33965e-06	-0.245126	0.837	0.877	0.0424235
Ptprm	5.46877e-06	-0.14373	0.936	0.945	0.0434494
Plpp3	5.55458e-06	-0.800149	0.133	0.199	0.0441312
Sgk1	5.83598e-06	0.462344	0.254	0.177	0.0463669
Cyp2c50	6.33932e-06	1.57465	0.059	0.024	0.0503659
Apoc2	6.53096e-06	1.02119	0.075	0.034	0.0518885
Atp2b1	6.66077e-06	0.225054	0.82	0.766	0.0529198
Mug1	6.87247e-06	0.574693	0.221	0.152	0.0546018
Sdc2	6.98163e-06	-0.760554	0.112	0.177	0.055469
Cox7c	7.39189e-06	0.788148	0.164	0.105	0.0587285
St6gal1	7.48479e-06	-0.489997	0.24	0.317	0.0594667
Lrrc4	7.73828e-06	0.474059	0.271	0.193	0.0614807
Wdfy2	7.91681e-06	-0.298761	0.607	0.658	0.0628991
Eif4a2	8.10562e-06	0.424437	0.422	0.342	0.0643991
Plbd1	8.20792e-06	0.661863	0.224	0.158	0.0652119
mt-Nd1	8.6704e-06	0.557625	0.204	0.135	0.0688863
Slc9a9	8.67976e-06	-0.171627	0.877	0.908	0.0689607
Hsd11b1	9.42179e-06	1.44386	0.038	0.011	0.0748561
Mup21	1.06247e-05	1.28716	0.056	0.023	0.0844133
Nfe2l2	1.09741e-05	-0.474161	0.282	0.362	0.0871895
Rpl10	1.11251e-05	0.732531	0.148	0.091	0.088389
Prkch	1.14133e-05	-0.539428	0.237	0.313	0.0906788
Cdk17	1.19324e-05	-0.437952	0.354	0.432	0.0948029
Gm4841	1.24159e-05	1.419	0.045	0.015	0.0986446
Rufy3	1.29735e-05	-0.306401	0.54	0.604	0.103074
Fli1	1.35165e-05	-0.282882	0.621	0.667	0.107388
Rps6ka5	1.39784e-05	0.447894	0.295	0.219	0.111058
Cyp8b1	1.42454e-05	2.80437	0.024	0.004	0.11318
Fes	1.42579e-05	-0.414989	0.254	0.335	0.113279
Aopep	1.48781e-05	-0.419049	0.297	0.373	0.118206
Tanc2	1.50179e-05	-0.248754	0.68	0.732	0.119318
F2	1.53402e-05	1.28665	0.068	0.031	0.121878
St3gal5	1.53772e-05	-0.206714	0.784	0.837	0.122172
Rpl18	1.57744e-05	0.805912	0.103	0.056	0.125327
Scp2	1.58072e-05	0.470218	0.387	0.31	0.125588
Dab2	1.59584e-05	-0.368452	0.455	0.528	0.12679
Gm50237	1.59659e-05	0.930936	0.114	0.065	0.126849
Cox4i1	1.61993e-05	0.817443	0.12	0.07	0.128704
Mug2	1.70811e-05	1.14788	0.054	0.022	0.135709
Rdh7	1.74584e-05	0.716175	0.103	0.056	0.138707
Gm37240	1.74932e-05	0.527556	0.3	0.227	0.138983
Ston2	1.75144e-05	-0.470112	0.377	0.444	0.139152
Fga	1.77615e-05	0.804665	0.168	0.109	0.141115
Mir142hg	1.80153e-05	0.439183	0.353	0.276	0.143132
Pon1	1.83603e-05	1.69398	0.038	0.012	0.145872
Orm1	1.85468e-05	1.1065	0.087	0.045	0.147355
H2-Eb1	1.86156e-05	0.558587	0.302	0.232	0.147901
Dtnbp1	1.88801e-05	-0.761919	0.117	0.177	0.150003
Stab2	1.92386e-05	-0.357983	0.366	0.447	0.152851
Proc	1.92825e-05	1.30624	0.05	0.019	0.153199
Apof	1.95438e-05	1.3546	0.05	0.019	0.155276
Akt3	1.98311e-05	0.315379	0.62	0.556	0.157558
Btbd9	2.02474e-05	-0.318155	0.566	0.625	0.160865
Cst3	2.11057e-05	0.793104	0.14	0.086	0.167685
Arhgap18	2.1228e-05	-0.512233	0.26	0.332	0.168656
Ndufa6	2.15739e-05	1.33606	0.063	0.028	0.171405
Fcna	2.16223e-05	-0.45	0.347	0.423	0.171789
Mid1	2.17046e-05	0.72056	0.185	0.125	0.172443
Selenbp2	2.4781e-05	-1.53773	0.032	0.07	0.196885
Angptl3	2.59045e-05	0.956318	0.064	0.029	0.205811
Vtn	2.63097e-05	0.898735	0.104	0.058	0.209031
Pnn	2.66263e-05	0.597449	0.257	0.19	0.211546
Bst2	2.6836e-05	0.672979	0.134	0.082	0.213212
Slc8a1	2.82579e-05	-0.162971	0.946	0.958	0.224509
Litaf	2.87215e-05	-0.509687	0.193	0.265	0.228192
Pola1	2.87755e-05	-0.409572	0.343	0.42	0.228622
Trim30a	2.93462e-05	0.231541	0.701	0.63	0.233155
Mcl1	2.96665e-05	0.378027	0.413	0.342	0.2357
Cyp3a25	3.01643e-05	1.09323	0.079	0.04	0.239655
Cyp2d26	3.07799e-05	1.29605	0.058	0.025	0.244546
Pemt	3.19686e-05	1.49545	0.043	0.015	0.25399
Pip4k2a	3.30632e-05	-0.269968	0.677	0.718	0.262687
Pld4	3.31202e-05	-0.374274	0.41	0.486	0.26314
Cyp1a2	3.34686e-05	1.84222	0.03	0.008	0.265908
Dnajb9	3.34885e-05	1.25173	0.063	0.029	0.266066
Snx25	3.40557e-05	-0.38454	0.307	0.385	0.270573
Rps5	3.45006e-05	1.14451	0.078	0.04	0.274107
Atp13a2	3.45219e-05	-0.466099	0.275	0.349	0.274276
Nrxn1	3.52307e-05	-0.0818676	0.017	0.049	0.279908
Ano6	3.53355e-05	-0.227273	0.722	0.756	0.280741
Rpl27a	3.53396e-05	0.579272	0.203	0.141	0.280773
Filip1l	3.53405e-05	0.221219	0.645	0.563	0.28078
Ptprc	3.56085e-05	0.209791	0.871	0.837	0.282909
Pik3cd	3.61936e-05	-0.389362	0.464	0.525	0.287558
Cebpd	4.05219e-05	1.27812	0.054	0.023	0.321947
Cited2	4.17281e-05	1.03837	0.077	0.039	0.33153
Nceh1	4.22853e-05	-0.625854	0.144	0.207	0.335957
Zmym2	4.30486e-05	0.342709	0.379	0.299	0.342021
Rpl17	4.32663e-05	0.838565	0.128	0.079	0.343751
Gbp4	4.42636e-05	0.395019	0.245	0.175	0.351675
Pah	4.44802e-05	1.07174	0.079	0.041	0.353395
Smg6	4.53809e-05	-0.474977	0.362	0.427	0.360551
Gjb1	4.54115e-05	1.5209	0.048	0.019	0.360794
Dnmt3a	4.54753e-05	-0.328205	0.501	0.554	0.361301
Herc4	4.66642e-05	0.247454	0.651	0.588	0.370747
E530011L22Rik	4.68827e-05	1.28019	0.061	0.028	0.372483
Tom1	4.69638e-05	-0.711976	0.127	0.187	0.373128
Ddhd1	4.76615e-05	-0.258708	0.707	0.736	0.37867
Ces1d	4.82488e-05	1.45209	0.041	0.015	0.383336
Rbm8a	4.94884e-05	1.31198	0.048	0.019	0.393186
Usp50	4.96201e-05	0.567141	0.201	0.142	0.394232
Ugp2	4.99804e-05	0.46907	0.233	0.167	0.397094
Lrrfip1	5.06948e-05	-0.600535	0.188	0.252	0.40277
Ndufa13	5.16874e-05	0.915046	0.082	0.043	0.410657
Gatm	5.22088e-05	0.720874	0.154	0.101	0.414799
Rabac1	5.22311e-05	0.865903	0.07	0.034	0.414976
Arid5b	5.25534e-05	0.311015	0.489	0.402	0.417537
Gns	5.2643e-05	-0.376089	0.462	0.525	0.418249
Tst	5.5238e-05	1.46703	0.036	0.012	0.438866
Sntg1	5.72478e-05	-1.72323	0.009	0.033	0.454834
Rpl32	5.73012e-05	0.789483	0.12	0.073	0.455258
Pbx1	5.87465e-05	-0.453468	0.173	0.241	0.466741
Atp5j	5.89264e-05	1.04683	0.065	0.031	0.46817
Stx8	6.09715e-05	-0.340963	0.315	0.39	0.484419
Tmcc1	6.21459e-05	-0.177757	0.789	0.841	0.493749
Washc2	6.34398e-05	-0.496522	0.206	0.275	0.504029
Asgr1	6.49548e-05	1.26087	0.054	0.024	0.516066
Atf4	6.64977e-05	0.763461	0.095	0.053	0.528324
Ccdc88a	6.86898e-05	0.334886	0.409	0.335	0.54574
mt-Co2	6.94033e-05	0.584828	0.34	0.277	0.551409
Cyp2c23	7.23149e-05	1.78065	0.03	0.008	0.574542
Slc27a5	7.47912e-05	1.54255	0.04	0.015	0.594216
Cebpa	7.58367e-05	0.774046	0.106	0.062	0.602523
Cd53	7.79444e-05	0.344669	0.357	0.285	0.619268
Ndufab1	7.86594e-05	0.807876	0.073	0.037	0.624949
Entpd1	7.89094e-05	-0.268568	0.669	0.722	0.626935
Alad	7.89789e-05	1.51586	0.034	0.011	0.627487
Rpl27	8.06615e-05	1.02416	0.085	0.046	0.640855
Rgn	8.22533e-05	1.16474	0.076	0.039	0.653503
Fam120a	8.22774e-05	-0.361501	0.32	0.395	0.653694
Nfia	8.24793e-05	-0.333146	0.512	0.575	0.655298
Tra2a	8.45657e-05	-0.308922	0.445	0.52	0.671874
Ndufb9	8.83393e-05	1.04295	0.062	0.03	0.701856
Cox8a	8.84526e-05	0.743328	0.102	0.059	0.702756
Rptor	8.90568e-05	-0.492574	0.216	0.282	0.707557
Atp5g1	9.07884e-05	1.38022	0.054	0.024	0.721314
Ece1	9.1299e-05	-0.767879	0.063	0.108	0.725371
Rps10	0.000100196	0.775711	0.103	0.061	0.796059
Slc25a33	0.000102984	-0.698926	0.096	0.148	0.81821
Taf3	0.000108647	-0.56797	0.171	0.233	0.863197
Irf8	0.000108844	-0.531925	0.197	0.258	0.864769
Evi5	0.000110622	0.308822	0.385	0.31	0.878893
Ugt2b36	0.000111156	0.770563	0.083	0.045	0.883138
Trp53inp1	0.00011219	0.759636	0.098	0.057	0.891351
Maml2	0.000112945	-0.205928	0.681	0.737	0.897348
Aldh1a1	0.000121417	0.878888	0.088	0.049	0.964655
Slc2a2	0.000121439	0.972368	0.056	0.026	0.964836
Pomp	0.000126186	0.880943	0.088	0.049	1
Gpd2	0.000126764	-0.55853	0.12	0.177	1
Hist1h2bc	0.000127307	1.102	0.065	0.032	1
Rpl9	0.000128094	0.6818	0.119	0.073	1
Tsc22d3	0.000133913	0.401885	0.277	0.213	1
Scand1	0.000134517	0.709019	0.144	0.096	1
Dock8	0.000136172	0.20837	0.763	0.745	1
Btf3	0.000137146	0.883293	0.078	0.042	1
Spata5	0.000140332	-0.433908	0.214	0.281	1
Fam135a	0.000142472	-0.927694	0.069	0.113	1
Ly6e	0.00014302	0.313668	0.447	0.377	1
Akap10	0.000145139	0.251557	0.531	0.455	1
Cyp2a12	0.000146553	1.49389	0.034	0.012	1
Tk2	0.000147811	0.672906	0.108	0.065	1
Ncoa2	0.000152028	-0.299476	0.52	0.582	1
Adap2os	0.000152858	0.404406	0.44	0.379	1
A330040F15Rik	0.000154917	0.324227	0.433	0.36	1
Rps3a1	0.000157515	0.647842	0.15	0.101	1
Apoa5	0.000158037	0.676481	0.121	0.076	1
B3gnt2	0.000158519	0.417935	0.177	0.121	1
5330438D12Rik	0.000160125	0.392623	0.29	0.225	1
Actr3	0.000160455	0.184901	0.701	0.641	1
Cped1	0.000162978	-1.52708	0.013	0.039	1
Cisd1	0.000164089	1.4094	0.043	0.018	1
Ces1f	0.0001661	1.75342	0.031	0.01	1
Cggbp1	0.000172691	0.810488	0.132	0.087	1
Ptprb	0.000174066	-1.46019	0.021	0.05	1
Far1os	0.000175989	0.731592	0.093	0.054	1
Rps18	0.000177779	0.854198	0.095	0.056	1
Pvt1	0.000182745	-0.192195	0.808	0.844	1
Tomm20	0.000184744	1.05238	0.067	0.035	1
Hspe1	0.000187853	1.4647	0.047	0.02	1
AC149090.1	0.000188584	-0.202581	0.764	0.811	1
Tmtc1	0.000188814	-0.628146	0.186	0.242	1
Ing4	0.000189128	0.535887	0.147	0.098	1
Rapgef4	0.000189789	-0.774595	0.045	0.083	1
Ctss	0.000194265	0.334273	0.528	0.466	1
Junb	0.000194404	0.73922	0.098	0.058	1
Arhgap24	0.000194792	-0.867259	0.052	0.092	1
Selenok	0.000198212	0.998965	0.068	0.035	1
Creg1	0.000202477	0.399976	0.235	0.175	1
Tgm2	0.000203818	-0.628343	0.136	0.192	1
4732471J01Rik	0.000206273	0.440886	0.263	0.202	1
Rbpms	0.00020774	-0.774755	0.141	0.194	1
Clu	0.000210981	0.955612	0.1	0.061	1
Ebp	0.000213174	1.37362	0.049	0.022	1
Fmn1	0.000214901	-0.287948	0.412	0.477	1
Tmem205	0.000215055	1.02016	0.081	0.046	1
Bcl2	0.000217081	-1.00186	0.057	0.097	1
Gm47167	0.000219225	0.917806	0.094	0.055	1
Lamtor1	0.00021925	0.755176	0.091	0.053	1
Serpinc1	0.000223174	0.680526	0.109	0.067	1
Fam193b	0.000232901	-0.629706	0.171	0.225	1
Ifi207	0.000234007	0.288388	0.577	0.525	1
Rpl7a	0.000236922	0.670401	0.084	0.047	1
Rps21	0.000236973	0.723228	0.132	0.087	1
Zfp36	0.000240891	0.64401	0.152	0.104	1
Sgpp1	0.000244953	0.676067	0.111	0.069	1
Aadac	0.000245887	1.01962	0.048	0.021	1
Cables1	0.000251141	0.906018	0.077	0.043	1
4930599N23Rik	0.000252785	0.444259	0.19	0.134	1
Dpp3	0.000253031	-0.901788	0.035	0.07	1
Fetub	0.000254869	1.75626	0.034	0.013	1
Zfp322a	0.00025612	0.715896	0.113	0.07	1
Ier2	0.000257164	1.19825	0.063	0.032	1
Crppa	0.00025764	-0.493563	0.138	0.192	1
Pced1b	0.000257898	-0.416642	0.209	0.272	1
Apobec1	0.000260885	0.21077	0.737	0.696	1
Hsp90b1	0.000265141	0.303191	0.476	0.404	1
Ubl5	0.00026559	1.19169	0.059	0.03	1
Senp2	0.000266769	0.521376	0.306	0.246	1
Slc33a1	0.000269579	0.612698	0.13	0.085	1
Uqcrh	0.000272132	0.786954	0.106	0.065	1
Ptgs1	0.000273233	-0.331947	0.585	0.62	1
Epn1	0.000273287	-0.409595	0.253	0.319	1
Vav3	0.000281797	-0.383709	0.268	0.33	1
Slc38a3	0.000282092	1.01171	0.054	0.025	1
Wdr7	0.000286114	-0.306754	0.241	0.306	1
Nkain2	0.000287398	-2.0941	0.009	0.03	1
Cyp26b1	0.000301298	-2.76672	0.003	0.019	1
Runx1	0.000308397	-0.30733	0.639	0.668	1
Fto	0.000314404	-0.353466	0.339	0.413	1
Tasor	0.000327087	0.244584	0.61	0.542	1
Acsf2	0.000331181	-0.640711	0.074	0.118	1
Jund	0.000333891	0.811236	0.086	0.05	1
Hsp90ab1	0.000335892	0.432984	0.181	0.127	1
Rere	0.000337566	-0.254865	0.516	0.577	1
Rplp1	0.00033787	0.451498	0.247	0.188	1
Ppib	0.00033924	0.919352	0.1	0.062	1
Phactr1	0.000348938	-0.494959	0.151	0.208	1
Il31ra	0.000349173	-1.0811	0.034	0.067	1
Atxn2l	0.000351559	0.516536	0.207	0.155	1
Hist1h1c	0.000352576	0.762604	0.066	0.035	1
Fam49a	0.000360407	-0.330644	0.488	0.532	1
Snx8	0.000361905	-0.405494	0.211	0.271	1
Mfsd4a	0.000364752	0.847318	0.076	0.043	1
Aldh6a1	0.000366387	1.21831	0.058	0.03	1
2001-03-01	0.00037172	0.87498	0.048	0.022	1
Rps16	0.000374068	0.465641	0.141	0.092	1
Gm10069	0.000378056	1.6499	0.027	0.008	1
Pros1	0.000379846	0.42752	0.222	0.165	1
Prdx5	0.000389823	0.993124	0.082	0.048	1
Polr1a	0.000399158	-0.820612	0.086	0.13	1
Jun	0.000405483	1.01829	0.054	0.027	1
Dad1	0.000406781	1.05015	0.057	0.029	1
Rpl35a	0.000413134	0.713734	0.139	0.094	1
Cd74	0.000418089	0.33422	0.627	0.577	1
Rps26	0.000421737	0.824155	0.099	0.061	1
Vamp4	0.000430907	-0.494977	0.185	0.244	1
Usp8	0.000438177	0.316423	0.377	0.313	1
Rps27l	0.000440478	0.707757	0.057	0.029	1
Ralgapa2	0.000441378	-0.535156	0.169	0.223	1
Ppp3ca	0.000442505	-0.190091	0.735	0.782	1
2410002F23Rik	0.000447739	-0.77811	0.046	0.082	1
Rpl19	0.000449188	0.588861	0.144	0.099	1
2210408I21Rik	0.000454875	-0.524266	0.167	0.22	1
Mup17	0.000457557	0.88782	0.15	0.106	1
Pde3b	0.000464683	-0.883986	0.05	0.086	1
Nisch	0.000467574	-0.370773	0.349	0.413	1
Arhgef1	0.0004705	0.338017	0.257	0.198	1
Ttc39b	0.00047356	-0.415722	0.217	0.278	1
Tmem33	0.000475526	0.781075	0.095	0.058	1
Gsdme	0.000479598	0.701677	0.102	0.063	1
Man1a	0.000481707	-0.533248	0.169	0.223	1
Chchd3	0.000489873	-0.354542	0.296	0.357	1
Jak1	0.000489873	-0.258107	0.361	0.439	1
Cyp4a12a	0.000491469	1.48325	0.029	0.01	1
Itpr1	0.000505952	-0.283443	0.275	0.345	1
Sumf1	0.000506607	-0.527305	0.12	0.172	1
Dhcr24	0.00050917	1.11035	0.048	0.023	1
Epsti1	0.000514693	-0.161077	0.717	0.765	1
Fgd2	0.000520979	0.266772	0.509	0.446	1
Idi1	0.000525916	1.13957	0.035	0.014	1
Ldlrad4	0.00052841	-0.848433	0.057	0.095	1
Pla2g4a	0.000532153	0.18775	0.688	0.637	1
Smad7	0.000536934	0.492728	0.241	0.186	1
Sgk2	0.000542541	3.61038	0.011	0.001	1
Hs6st1	0.000553318	-0.413371	0.201	0.258	1
Cox7a2	0.000562334	1.04582	0.067	0.037	1
Cblb	0.000563347	-0.47517	0.235	0.291	1
Oas2	0.000564422	0.228922	0.478	0.407	1
Dlc1	0.000565633	-0.195779	0.703	0.741	1
Ldlr	0.0005727	0.991486	0.049	0.023	1
Rbm47	0.000576859	-0.213694	0.678	0.73	1
Gm17133	0.000582478	-1.68047	0.009	0.028	1
Slc10a1	0.000582596	0.99726	0.048	0.023	1
Elovl3	0.000593162	0.821212	0.075	0.042	1
Ostc	0.000594874	0.907272	0.054	0.027	1
Lyn	0.000608718	-0.128168	0.953	0.956	1
Ppp1r9a	0.000615029	-0.223279	0.531	0.6	1
Tma7	0.0006224	0.976603	0.059	0.031	1
Nav2	0.000622994	-0.988493	0.028	0.056	1
Adss	0.000623748	0.803086	0.099	0.063	1
Ets2	0.000627819	-0.846282	0.048	0.083	1
Sc5d	0.000628293	0.956919	0.066	0.036	1
Zhx2	0.000632647	-0.584906	0.125	0.175	1
Ly6g2	0.000633102	2.28263	0.018	0.004	1
Cyp2j5	0.000651878	0.81005	0.063	0.034	1
Alkbh8	0.000665538	-0.719999	0.061	0.099	1
Serp1	0.000681129	0.829723	0.086	0.052	1
Actg1	0.000690215	0.458507	0.174	0.124	1
Rpl30	0.0006904	0.690679	0.124	0.084	1
Krt18	0.000692491	1.95036	0.022	0.006	1
Zfp366	0.000707465	-0.496109	0.193	0.249	1
Eea1	0.000712099	-0.442119	0.242	0.297	1
Cyb5a	0.000714322	0.60712	0.159	0.113	1
Med20	0.000723085	-0.93908	0.034	0.065	1
Cux1	0.000726826	-0.34807	0.349	0.407	1
Nop58	0.000729249	-1.16831	0.035	0.065	1
Slc39a14	0.000737709	-1.24758	0.032	0.061	1
Myo9a	0.000744023	-0.0973117	0.94	0.957	1
Rabggtb	0.000747629	-0.896943	0.035	0.066	1
Pcyt2	0.000775117	-0.718947	0.063	0.101	1
G0s2	0.000775616	1.21332	0.048	0.023	1
Rpl24	0.000786623	0.610203	0.114	0.075	1
Akap8l	0.00079672	-0.514308	0.19	0.243	1
Samhd1	0.000806872	0.221359	0.638	0.587	1
Baz2b	0.000819262	-0.262008	0.458	0.514	1
Cyba	0.000819377	0.343662	0.243	0.185	1
Hnrnpdl	0.000821025	0.257764	0.376	0.308	1
Serping1	0.000825026	1.16207	0.052	0.026	1
Gm28501	0.000827542	0.913725	0.066	0.037	1
Csf1r	0.000837912	0.200425	0.684	0.646	1
Cyp2a5	0.000839194	1.62537	0.019	0.005	1
Erp29	0.000862116	0.335439	0.272	0.211	1
Rabgap1l	0.000880644	-0.912489	0.051	0.085	1
Ppargc1b	0.000884638	-0.54075	0.15	0.2	1
Rps24	0.000887934	0.530387	0.185	0.136	1
Tmbim6	0.000888387	0.425757	0.259	0.205	1
Ccdc171	0.000888498	-0.57719	0.12	0.168	1
D230025D16Rik	0.000890374	-0.902255	0.037	0.068	1
Prkn	0.000903353	-0.306454	0.42	0.489	1
Mpp7	0.000912504	-0.720637	0.056	0.093	1
Slc12a2	0.000926531	0.579894	0.178	0.132	1
Fyn	0.000930971	-0.457867	0.24	0.294	1
Cmss1	0.000931197	-0.276302	0.566	0.618	1
Ptpn1	0.000931393	-0.267201	0.424	0.483	1
Zcchc4	0.000940386	-0.812397	0.048	0.082	1
Sult5a1	0.000997095	-4.3147	0.001	0.013	1
Nlk	0.00103623	-0.382916	0.241	0.3	1
Pan3	0.00107214	-0.196088	0.688	0.731	1
Zc3hav1	0.00107293	0.351488	0.314	0.261	1
Ppp1r10	0.00107463	0.522808	0.153	0.108	1
Adgrv1	0.00107596	-0.739885	0.057	0.093	1
Map3k12	0.00107611	1.45884	0.032	0.013	1
Laptm4a	0.00110902	0.467684	0.295	0.243	1
Wwox	0.00112892	-0.215686	0.49	0.551	1
Sdc1	0.00114922	2.31773	0.017	0.004	1
Cdc5l	0.00116096	-0.775648	0.076	0.114	1
2310039H08Rik	0.00117406	1.1165	0.032	0.013	1
Fbxo34	0.00117827	-0.520974	0.095	0.137	1
Col5a3	0.00118642	-2.33065	0.004	0.018	1
S100a10	0.00118995	0.954251	0.032	0.013	1
Mbl2	0.00121426	1.28713	0.033	0.013	1
Aldh8a1	0.00121863	1.44019	0.033	0.014	1
Slc7a2	0.00123342	0.592472	0.13	0.089	1
Gm46367	0.00124625	0.92897	0.069	0.04	1
Rrbp1	0.00126031	-0.189282	0.522	0.574	1
Abca8a	0.00126214	1.3633	0.021	0.006	1
Atp5md	0.00126312	1.04523	0.052	0.027	1
4930484I04Rik	0.00126562	0.972939	0.049	0.025	1
Mir99ahg	0.00127024	-1.09931	0.022	0.046	1
Abcg3	0.00128741	0.238577	0.668	0.62	1
Trim34a	0.00129828	0.488841	0.162	0.118	1
Cox6c	0.00131022	0.598016	0.094	0.059	1
Pdia6	0.00133459	0.460549	0.141	0.099	1
Gtf2ird1	0.00135436	-0.60618	0.083	0.123	1
Mocos	0.00135615	-1.38203	0.016	0.038	1
Ank3	0.00136937	-1.2744	0.013	0.034	1
Bphl	0.00138078	1.41346	0.036	0.016	1
Bgn	0.00139036	1.85232	0.022	0.007	1
Srsf7	0.00139636	0.440341	0.289	0.237	1
Cyp2f2	0.00140205	0.927108	0.068	0.039	1
Pebp1	0.00140507	-0.628874	0.074	0.112	1
Tle4	0.00140587	-0.258485	0.618	0.646	1
Slco1a1	0.0014179	0.728879	0.086	0.054	1
Mat2a	0.00142822	0.295208	0.326	0.269	1
Gse1	0.00143103	0.518521	0.173	0.127	1
Iqgap2	0.00143986	-0.170466	0.632	0.696	1
Ddx3y	0.00146944	-0.264995	0.333	0.392	1
Rasgrp2	0.00146958	-0.358052	0.238	0.297	1
Fam76b	0.00147665	0.375577	0.219	0.168	1
Robo2	0.00148867	-2.85989	0.002	0.014	1
Cacnb2	0.0014959	-2.89942	0.002	0.014	1
Gm22146	0.00152741	-1.00658	0.025	0.05	1
Tsku	0.00153205	-1.02263	0.024	0.049	1
Fam172a	0.0015427	-0.165072	0.663	0.715	1
Zcchc24	0.0015641	-0.549678	0.09	0.13	1
Naca	0.00158875	0.57441	0.082	0.051	1
Rbm5	0.00161608	-0.300298	0.321	0.375	1
C1qb	0.00164093	0.210072	0.58	0.531	1
Acrbp	0.00165763	-0.550019	0.07	0.107	1
Echdc1	0.00166151	0.749473	0.081	0.05	1
Rsf1os1	0.00166391	0.68505	0.077	0.047	1
Mrps28	0.00166475	-0.558231	0.143	0.19	1
Smdt1	0.00166508	0.985538	0.054	0.03	1
Uba7	0.00166946	-0.523043	0.116	0.159	1
Rps7	0.00169226	0.537688	0.112	0.075	1
Ftl1	0.00169422	0.222672	0.542	0.473	1
Trnau1ap	0.00170758	-0.593525	0.053	0.086	1
Rgl2	0.00171379	-0.385305	0.217	0.271	1
Ikzf1	0.00172271	-0.294941	0.591	0.604	1
Itch	0.00172686	-0.216246	0.631	0.67	1
Hist1h1e	0.00172854	0.997603	0.041	0.02	1
Cfdp1	0.00175104	-0.551899	0.098	0.139	1
Mycbp2	0.00175998	-0.126466	0.799	0.822	1
Dop1a	0.00176538	0.294877	0.322	0.263	1
Pdgfc	0.0017742	0.291222	0.465	0.412	1
Ptpn4	0.00178409	-0.610757	0.038	0.068	1
Hsd17b13	0.00180628	1.56039	0.032	0.013	1
Stard3	0.00182352	-0.556525	0.091	0.131	1
Slc22a30	0.00182357	-0.684252	0.048	0.08	1
Ddi2	0.00183023	-0.263386	0.367	0.428	1
Gabarapl1	0.00183869	1.01229	0.042	0.02	1
M6pr	0.00185231	0.583961	0.09	0.057	1
6530409C15Rik	0.00185443	0.629539	0.112	0.075	1
Syk	0.00185498	-0.252471	0.554	0.601	1
Plekhm1	0.00185866	-0.404534	0.21	0.261	1
Gcdh	0.00186575	0.951696	0.048	0.025	1
Hnrnpk	0.00187324	0.409447	0.294	0.246	1
Gm48678	0.00188844	0.39673	0.209	0.16	1
Sh3bp2	0.00190678	-0.406099	0.235	0.289	1
Eri3	0.00191485	-0.384826	0.214	0.266	1
Agt	0.00192688	1.38597	0.032	0.013	1
Ptk2b	0.00195053	-0.323982	0.412	0.458	1
Immp2l	0.00196549	-0.192024	0.55	0.604	1
Ppia	0.00197125	0.581431	0.145	0.106	1
Stxbp2	0.00198315	-0.656857	0.109	0.15	1
Plcl1	0.00199102	-0.291931	0.543	0.575	1
Apol7a	0.00202336	3.09173	0.011	0.001	1
Kidins220	0.00202424	-0.273715	0.446	0.495	1
Nipa2	0.00202877	0.360024	0.361	0.307	1
Stx4a	0.00207828	-0.4484	0.178	0.227	1
Chd1l	0.00209406	-1.19292	0.023	0.046	1
Rapgef6	0.00210901	0.263702	0.51	0.463	1
Rpl11	0.00214151	0.604843	0.133	0.094	1
Exoc7	0.00214917	-0.994882	0.029	0.054	1
Nfkbia	0.00219202	0.32965	0.218	0.168	1
Ndufb11	0.00219832	0.799762	0.033	0.014	1
Nme2	0.00222137	0.725946	0.069	0.041	1
4833420G17Rik	0.0022278	0.336638	0.224	0.175	1
Pzp	0.0022711	0.566399	0.146	0.106	1
Sdhaf3	0.0022921	-0.718631	0.043	0.073	1
mt-Nd5	0.00233298	0.721416	0.091	0.059	1
Ceacam1	0.00233565	1.37971	0.027	0.011	1
Cr1l	0.00235323	-0.515608	0.153	0.199	1
Mier1	0.00237308	0.226645	0.553	0.514	1
Gamt	0.00237936	1.85146	0.021	0.007	1
Pnp	0.0023816	0.844131	0.057	0.032	1
Mapre2	0.00238235	-0.382922	0.291	0.339	1
Nuak2	0.00238798	-0.37499	0.172	0.222	1
Pdlim5	0.00239901	0.256578	0.462	0.401	1
Dld	0.00242497	0.687605	0.077	0.048	1
Cmtm4	0.00242509	0.513394	0.12	0.083	1
Tdg	0.0024642	0.851076	0.053	0.029	1
Dlgap1	0.00247085	-2.14201	0.007	0.022	1
Cdh18	0.00247146	-2.29162	0.004	0.017	1
Erc2	0.00247911	-2.04561	0.004	0.017	1
Inpp5a	0.00248416	-0.545392	0.102	0.143	1
Slc39a8	0.00248519	1.26059	0.021	0.007	1
2010315B03Rik	0.00254572	0.520672	0.118	0.082	1
Plin2	0.0025996	-0.452907	0.182	0.228	1
Cyp4a12b	0.00260936	1.99629	0.017	0.005	1
Cpeb3	0.00264293	-0.281016	0.265	0.319	1
Tmod3	0.0026488	-0.352766	0.18	0.23	1
5031425E22Rik	0.00265198	0.386781	0.284	0.234	1
Tpp2	0.00266107	0.192035	0.594	0.537	1
Gm2245	0.00267351	0.239443	0.375	0.319	1
Prr5l	0.00268254	0.563322	0.146	0.106	1
Naaladl2	0.0026879	-0.767291	0.035	0.063	1
Lpcat3	0.00270335	-0.725266	0.067	0.101	1
Npc2	0.00270432	0.334884	0.226	0.176	1
Rp2	0.00276003	0.407532	0.197	0.151	1
Ctdspl2	0.00277482	0.483823	0.181	0.137	1
Pcbd1	0.00279767	1.32086	0.022	0.008	1
Pfkfb3	0.00280042	-0.444927	0.141	0.185	1
E130102H24Rik	0.00280567	0.546242	0.125	0.089	1
Arih2	0.00283112	-0.440016	0.229	0.276	1
Hrg	0.00284077	0.737755	0.042	0.021	1
Rassf1	0.00288801	0.416652	0.122	0.085	1
Mir133a-1hg	0.00290118	0.688368	0.044	0.023	1
F10	0.00291208	1.31863	0.031	0.013	1
Gm17494	0.00294206	1.61444	0.023	0.008	1
Arcn1	0.00294281	0.452596	0.207	0.163	1
Slc30a9	0.00296153	-0.457593	0.178	0.224	1
Mpp1	0.00298706	0.382261	0.168	0.125	1
Ric8b	0.00300694	-0.603954	0.109	0.149	1
Rbm39	0.00303201	0.163615	0.796	0.743	1
Ldlrap1	0.00304125	-0.780898	0.05	0.08	1
Mob1a	0.00304834	0.445102	0.108	0.073	1
Zyx	0.00305017	-0.43031	0.123	0.168	1
Sik2	0.00305841	0.224539	0.416	0.355	1
Gjb2	0.00307077	2.18039	0.014	0.004	1
Clic1	0.00307181	0.44131	0.158	0.117	1
Errfi1	0.00307808	0.316284	0.224	0.174	1
Gmds	0.0031121	-0.418383	0.211	0.255	1
Abcg8	0.00312296	1.64327	0.018	0.006	1
Upp2	0.00312307	0.204578	0.158	0.114	1
Gapdh	0.00315812	0.682488	0.063	0.037	1
Fau	0.00317283	0.428511	0.218	0.17	1
Synj1	0.00318161	0.259286	0.462	0.408	1
Samd12	0.00322282	-2.82025	0.002	0.013	1
Ulk2	0.0032814	0.25088	0.559	0.511	1
Cluap1	0.0033508	0.565284	0.076	0.048	1
Pja2	0.00339991	0.389358	0.206	0.16	1
Gm26827	0.00340197	0.421982	0.087	0.056	1
Tmem51	0.00341654	-0.342977	0.279	0.331	1
Dcn	0.00342558	1.06991	0.05	0.027	1
Rap1a	0.00345491	0.209404	0.593	0.529	1
Sfi1	0.00346357	-0.426307	0.143	0.187	1
Slc11a1	0.00346674	0.264581	0.483	0.435	1
Mroh1	0.00347982	-0.539926	0.116	0.156	1
D730045B01Rik	0.003517	1.70582	0.026	0.011	1
Itih2	0.00352782	1.00181	0.035	0.017	1
Ube4b	0.00353327	-0.409924	0.198	0.244	1
Baat	0.00353625	1.11399	0.035	0.017	1
Stub1	0.00354491	-0.535592	0.106	0.145	1
Rnf2	0.00357352	0.383947	0.119	0.082	1
Pltp	0.00358307	-0.367992	0.247	0.295	1
Gm17227	0.00359003	0.828475	0.075	0.047	1
Jkamp	0.00359899	-1.16123	0.026	0.049	1
Abat	0.00361833	1.56649	0.019	0.006	1
Gm4951	0.00361941	0.203418	0.635	0.594	1
Irgm1	0.00362753	0.400643	0.159	0.119	1
Tsc22d2	0.00363805	-0.342578	0.252	0.301	1
Mgat5	0.00364859	-0.230495	0.348	0.407	1
Arl4a	0.00365017	1.05313	0.036	0.018	1
Abcb4	0.00366633	-0.396637	0.097	0.135	1
Sgms2	0.00366652	1.32783	0.019	0.006	1
P4hb	0.00369773	0.541023	0.142	0.104	1
Med13	0.00373481	0.188385	0.428	0.37	1
Ctdp1	0.00374336	-0.838792	0.041	0.068	1
4930414N06Rik	0.00376414	0.889299	0.036	0.018	1
Slc7a7	0.00376714	-0.31111	0.281	0.33	1
2900089D17Rik	0.00376818	0.944939	0.039	0.02	1
Selenoo	0.0037775	0.635694	0.059	0.035	1
Fam168b	0.00378539	0.379292	0.182	0.139	1
Cast	0.00378551	0.421565	0.21	0.167	1
Hjurp	0.0037904	-0.533002	0.18	0.221	1
Acsm3	0.00379903	2.19815	0.015	0.004	1
Insig2	0.00382316	0.356559	0.098	0.065	1
Atp2a2	0.0038282	0.28376	0.314	0.261	1
Nr3c2	0.00385078	-0.542462	0.15	0.192	1
Mettl7a1	0.00386551	0.875035	0.045	0.024	1
1110032A03Rik	0.00392782	1.29033	0.027	0.011	1
Apobec3	0.00393951	0.417987	0.19	0.148	1
C4bp	0.00394013	0.826776	0.05	0.027	1
Nudt4	0.0039604	0.892568	0.048	0.026	1
Psmb2	0.00398632	0.488865	0.181	0.139	1
Stx16	0.00400648	0.171105	0.554	0.499	1
Iscu	0.00403275	0.767839	0.045	0.024	1
Stk40	0.00407291	-0.700298	0.062	0.094	1
Twf1	0.00410443	0.579752	0.112	0.078	1
Zfp236	0.00410584	0.318411	0.238	0.19	1
Zfp945	0.00415154	0.519221	0.123	0.088	1
Meis2	0.00415498	-1.76465	0.005	0.018	1
Dcp2	0.00418667	0.461285	0.163	0.123	1
Serpinb6a	0.00420155	-0.35409	0.248	0.297	1
Uqcr11	0.00421614	0.659772	0.065	0.039	1
Stard9	0.00425836	-0.249966	0.415	0.463	1
Srrm1	0.00429616	0.298293	0.338	0.288	1
Igfbp1	0.00430047	1.28936	0.028	0.012	1
Gm47465	0.00434343	-5.73408	0	0.008	1
Lgals3bp	0.00436607	0.370383	0.109	0.075	1
F830016B08Rik	0.00441812	0.428981	0.178	0.136	1
Rps25	0.00441963	0.628946	0.104	0.073	1
Gm20559	0.00443137	0.22485	0.386	0.334	1
Psma3	0.00443992	0.35327	0.267	0.218	1
Wsb1	0.00446273	0.232336	0.517	0.46	1
Trim14	0.0044721	-0.300543	0.359	0.406	1
Ttyh2	0.00453053	-0.476912	0.109	0.148	1
Nabp1	0.00454476	0.44994	0.206	0.163	1
Mia3	0.0045697	0.509885	0.151	0.113	1
Gm28198	0.00461496	0.693536	0.064	0.039	1
Rasa1	0.0046226	0.20529	0.528	0.468	1
Fam160a2	0.00467218	0.457229	0.12	0.085	1
Colec11	0.00469199	3.78854	0.008	0.001	1
Pfn1	0.00469346	0.369769	0.186	0.143	1
Gosr2	0.00471623	0.757099	0.056	0.033	1
Preb	0.00471678	-0.378211	0.171	0.218	1
Mettl9	0.00473548	0.408501	0.172	0.131	1
Pik3c2g	0.00474383	-2.93931	0.002	0.012	1
Slco1a4	0.00474849	2.39271	0.008	0.001	1
Tmem87a	0.00475717	0.259833	0.348	0.298	1
Rtn4	0.00478157	-0.220273	0.545	0.579	1
Slc43a2	0.00479429	-0.303412	0.411	0.456	1
Sypl	0.00484141	0.550005	0.117	0.083	1
Dmxl1	0.00489874	0.161379	0.542	0.491	1
Cyp2c54	0.0048998	0.810687	0.03	0.013	1
Pard3b	0.00493582	-0.496336	0.11	0.149	1
Snx16	0.00493653	-0.879959	0.03	0.053	1
Tcn2	0.00493938	-0.403652	0.188	0.232	1
Setbp1	0.00497046	-3.38746	0.001	0.01	1
Desi2	0.00499035	-0.46156	0.168	0.211	1
2610020C07Rik	0.00502958	0.537282	0.112	0.079	1
H2-Ab1	0.00505664	0.296902	0.321	0.275	1
Psma6	0.00506719	0.51519	0.136	0.1	1
Lamp2	0.00506908	0.188936	0.558	0.512	1
Inpp1	0.00509124	0.394092	0.063	0.038	1
Mcu	0.00510616	-0.245309	0.13	0.173	1
Kras	0.00515455	0.264598	0.36	0.308	1
Sdhd	0.00516507	0.97484	0.046	0.025	1
Prr14l	0.00516957	-0.266503	0.268	0.317	1
Auts2	0.00519041	-1.44207	0.004	0.015	1
Rnf214	0.00519209	0.322161	0.186	0.144	1
Cdc23	0.00528979	0.959731	0.047	0.026	1
Ppp6r2	0.00530428	0.488256	0.132	0.096	1
Nus1	0.00530845	-0.411577	0.102	0.14	1
Fryl	0.00532464	-0.230037	0.292	0.344	1
Haus3	0.00532466	0.612908	0.057	0.034	1
1700028E10Rik	0.00534445	0.975271	0.047	0.026	1
Tnrc18	0.00536363	0.257274	0.337	0.285	1
Ikbke	0.00541264	-0.368313	0.214	0.261	1
Eml5	0.00542991	1.05706	0.034	0.017	1
Hal	0.00546157	1.03043	0.038	0.02	1
Ddx47	0.00548375	0.946544	0.059	0.036	1
Uqcrb	0.00549246	0.747376	0.05	0.028	1
AC163685.1	0.00549541	0.623566	0.05	0.028	1
Hdgfl2	0.0054965	-0.983563	0.028	0.05	1
Aldh4a1	0.00550638	0.924767	0.039	0.02	1
Ubac2	0.00551856	-0.441961	0.181	0.222	1
Oat	0.00553064	0.631264	0.064	0.039	1
Cyp2c67	0.00557766	0.577436	0.032	0.015	1
Mylip	0.00558658	-0.346251	0.176	0.222	1
Pkd2l2	0.00563455	0.579634	0.093	0.063	1
Cfhr2	0.00565998	0.492422	0.098	0.066	1
Glrx5	0.00567725	1.43122	0.024	0.01	1
Mtss1	0.00570902	0.379905	0.152	0.114	1
Khk	0.00572984	0.627085	0.064	0.039	1
Tmem30a	0.00573594	0.327858	0.145	0.106	1
Gmip	0.00579695	-0.240788	0.284	0.341	1
Cox7b	0.00580549	0.752865	0.083	0.056	1
Clasp1	0.00581175	-0.429964	0.208	0.25	1
Acaca	0.00585834	-0.415073	0.169	0.212	1
Aspa	0.00589186	-0.695832	0.062	0.092	1
Rpl23	0.00592902	0.367645	0.189	0.148	1
Dpyd	0.00597093	-0.334712	0.185	0.23	1
Arf5	0.00599675	0.648769	0.088	0.059	1
Pigr	0.00602282	0.657698	0.037	0.019	1
Cltc	0.0060291	0.195531	0.492	0.436	1
Fyb	0.00603704	0.1036	0.92	0.902	1
Retreg2	0.00604425	0.722498	0.045	0.025	1
Bnip3	0.00605705	1.00649	0.024	0.01	1
Crp	0.00608515	0.476481	0.054	0.031	1
Dgcr8	0.0062066	0.448463	0.121	0.088	1
Comt	0.00621155	0.292576	0.278	0.227	1
Rapgef1	0.0062694	-0.36264	0.169	0.214	1
Lncpint	0.00633779	-0.296796	0.47	0.503	1
Lipa	0.006347	0.311881	0.334	0.285	1
Tbc1d1	0.00636152	-0.206261	0.508	0.543	1
Tyk2	0.00636291	0.349976	0.191	0.151	1
Diaph1	0.00638309	-0.306872	0.224	0.27	1
Gm19710	0.00647578	0.426987	0.098	0.067	1
Gprc5c	0.00648671	-0.758997	0.022	0.042	1
Npm1	0.00649523	0.773984	0.087	0.059	1
A930015D03Rik	0.00649651	0.402803	0.126	0.092	1
Prkg1	0.0065301	-0.466359	0.027	0.049	1
Tecpr2	0.00657124	-0.432794	0.198	0.242	1
Sod1	0.00657713	0.50156	0.146	0.11	1
Wdr5	0.00657998	-0.639786	0.031	0.054	1
Rbl2	0.00659086	0.490492	0.126	0.092	1
Kat14	0.00661867	-0.553435	0.059	0.089	1
Tm9sf3	0.00668756	0.388513	0.252	0.211	1
Snhg8	0.00674602	0.806588	0.053	0.031	1
H2-Q4	0.00677156	0.772405	0.097	0.068	1
Ttpal	0.00677607	-1.01713	0.023	0.043	1
Hcfc1	0.00678622	0.709485	0.065	0.041	1
Rps12	0.00682327	0.496815	0.16	0.123	1
Med27	0.00683584	-0.444755	0.085	0.12	1
Cpsf3	0.00685702	-0.502627	0.072	0.104	1
Hsd3b5	0.00686406	1.96804	0.014	0.004	1
Inmt	0.00687269	1.5171	0.019	0.007	1
Etfb	0.00688278	0.686145	0.064	0.04	1
Tcaim	0.00688491	0.683971	0.071	0.046	1
Med26	0.0069053	-0.589355	0.064	0.094	1
Rbbp8	0.00692973	0.229862	0.366	0.313	1
Dera	0.00695562	-0.654988	0.057	0.086	1
Hc	0.00697108	-0.4863	0.05	0.077	1
Mettl7b	0.00697455	1.06573	0.046	0.026	1
Sod2	0.00698286	0.673038	0.093	0.064	1
Rpl39	0.00698414	0.83358	0.081	0.055	1
Fam160b2	0.00700298	-0.647069	0.048	0.075	1
Stx5a	0.00702345	-0.253814	0.184	0.232	1
Cox5b	0.00703065	0.865252	0.048	0.027	1
Cap1	0.00703932	0.389568	0.218	0.176	1
Idh3b	0.00705351	0.49054	0.059	0.036	1
Tent5a	0.0070764	0.264531	0.447	0.401	1
Aldh3a2	0.00711796	0.633354	0.066	0.042	1
Sh3glb2	0.00716583	-0.760085	0.032	0.054	1
Ptpre	0.00723272	0.486007	0.127	0.093	1
Acaa2	0.00723905	0.482319	0.105	0.074	1
Shq1	0.0072657	-0.526239	0.073	0.104	1
Urah	0.00739437	0.978647	0.029	0.013	1
Exoc4	0.00740519	-0.150453	0.71	0.732	1
Dach1	0.00743437	-2.95205	0.001	0.009	1
Ntn4	0.00769725	-0.886493	0.009	0.023	1
Hdlbp	0.00770155	0.284141	0.266	0.219	1
Ubxn7	0.00772667	-0.491806	0.103	0.139	1
Cox14	0.00772892	0.698395	0.048	0.027	1
Zfp955b	0.0077595	0.889067	0.044	0.025	1
Wdfy4	0.0077839	-0.267265	0.399	0.433	1
Phyh	0.00782192	0.480131	0.148	0.113	1
Syne1	0.00782283	-0.485005	0.101	0.136	1
Serpinf1	0.00782796	0.919515	0.032	0.015	1
F12	0.00783576	0.854061	0.032	0.015	1
Kdm7a	0.00786327	0.249214	0.397	0.348	1
Hnf4a	0.00790015	0.993125	0.04	0.022	1
Cfhr1	0.00795502	0.92161	0.033	0.017	1
Gm19522	0.00798386	0.514425	0.086	0.058	1
Psap	0.00799885	0.123171	0.666	0.615	1
Dsc2	0.00800695	3.02131	0.009	0.001	1
Crebrf	0.00804686	-0.253978	0.304	0.349	1
Nfil3	0.00806064	2.45341	0.011	0.003	1
Smim14	0.0080607	0.276503	0.189	0.149	1
Dnaja1	0.00806117	0.298632	0.188	0.149	1
Gls2	0.00809341	1.32781	0.021	0.008	1
Wbp2	0.00815001	0.773969	0.078	0.053	1
Ntm	0.00817843	-1.22803	0.019	0.037	1
Rab1a	0.00819309	-0.204206	0.257	0.308	1
Pts	0.0082173	0.614638	0.119	0.087	1
4930511M06Rik	0.00822911	-0.65829	0.025	0.045	1
Nnmt	0.00825132	1.50572	0.015	0.005	1
Actr1a	0.00828679	0.283681	0.118	0.085	1
Mrps26	0.00832333	0.564263	0.049	0.028	1
Bclaf1	0.00833088	0.187075	0.447	0.394	1
Alpk1	0.00839697	-0.361538	0.272	0.314	1
Ip6k1	0.00840239	-0.29792	0.241	0.289	1
Csde1	0.00840684	0.29929	0.359	0.312	1
Tubb4b	0.00840779	0.478487	0.032	0.015	1
Esr1	0.00843821	-1.02404	0.041	0.065	1
Bin3	0.00846629	-0.421073	0.167	0.205	1
Spcs2	0.00852453	0.515294	0.095	0.065	1
Baz1a	0.00855013	-0.256928	0.348	0.396	1
Pik3ap1	0.0086354	-0.167028	0.664	0.703	1
Ypel5	0.00864821	0.348829	0.182	0.142	1
Ift43	0.00866006	-0.620198	0.039	0.063	1
Rbis	0.00866017	0.82177	0.053	0.032	1
Mup9	0.00869279	-2.64389	0.003	0.013	1
Leap2	0.00877428	1.05458	0.022	0.009	1
Pip4p1	0.00878086	0.383988	0.179	0.14	1
Stard13	0.00880324	-0.305519	0.219	0.265	1
Ptbp3	0.00881451	0.177091	0.612	0.566	1
Scaf4	0.00883872	-0.350792	0.23	0.271	1
Glo1	0.00885322	0.509912	0.07	0.045	1
Cdk5rap2	0.00885928	-0.475248	0.141	0.178	1
Fastkd1	0.00889213	1.16815	0.047	0.027	1
Per2	0.00892493	-1.69064	0.003	0.013	1
Srsf2	0.00902055	0.224615	0.515	0.475	1
Cd163	0.00906112	0.238825	0.749	0.718	1
Slc9a1	0.00912285	-0.467124	0.11	0.146	1
Gm15622	0.00913177	4.99875	0.005	0	1
Nup54	0.00914655	-0.464842	0.062	0.091	1
Gm17178	0.00916296	1.10542	0.023	0.01	1
Efna1	0.00916912	1.75214	0.016	0.006	1
Safb2	0.00918659	-0.36938	0.196	0.235	1
Rsrc1	0.00921863	-0.231746	0.49	0.529	1
Anapc15	0.00922273	-0.209845	0.601	0.639	1
Vapa	0.00926657	-0.22964	0.272	0.32	1
Usp32	0.00928257	-0.196588	0.381	0.432	1
Fer	0.00934635	-0.221497	0.411	0.456	1
Mast4	0.00942092	-0.242435	0.276	0.325	1
Tnfaip2	0.00943947	-0.341231	0.365	0.406	1
Mdh1	0.00945582	0.53384	0.104	0.075	1
Riok3	0.00945833	-0.258021	0.222	0.268	1
Luc7l	0.0094817	-0.341938	0.173	0.217	1
Mta1	0.00948735	-0.579413	0.039	0.063	1
Inpp5d	0.00962373	-0.151272	0.551	0.591	1
Ptprg	0.00965269	-1.35844	0.014	0.03	1
Wasf2	0.00975902	0.159986	0.694	0.654	1
Tuba4a	0.00975909	1.0437	0.024	0.011	1
Crot	0.00979326	0.351065	0.137	0.102	1
Nfkb1	0.00981844	-0.287749	0.367	0.414	1
Ccdc148	0.00987714	-0.263037	0.406	0.449	1
Rps15a	0.00990335	0.589978	0.11	0.08	1
9630028H03Rik	0.00991713	-5.71773	0	0.006	1
Gna14	0.00991713	-5.39078	0	0.006	1
Dnajb14	0.00993762	0.308361	0.214	0.172	1
Gm44686	0.00997999	0.574712	0.074	0.049	1
Cbfb	0.00999034	0.252955	0.381	0.334	1
Slc25a21	0.0100027	-1.1531	0.012	0.027	1
Ak2	0.0100253	0.520444	0.108	0.078	1
Selenot	0.0100346	0.440079	0.096	0.067	1
2210408F21Rik	0.0100433	-0.441668	0.167	0.206	1
Top3b	0.010076	-0.502737	0.078	0.109	1
Tmem87b	0.0101305	-0.257408	0.262	0.311	1
Napa	0.0101514	-0.482329	0.082	0.113	1
Stbd1	0.0102145	1.77166	0.012	0.004	1
Cd84	0.010232	-0.258522	0.507	0.532	1
Gga1	0.0102665	-0.529558	0.119	0.154	1
Rnf169	0.0102761	-0.168407	0.441	0.497	1
Gtf3c3	0.0103022	-0.48639	0.058	0.086	1
Tfr2	0.0103327	0.854406	0.025	0.011	1
Camk2d	0.0104305	-0.147375	0.728	0.747	1
Rps28	0.0104623	0.605928	0.089	0.062	1
Fam120b	0.0104816	0.438151	0.164	0.129	1
Arhgap30	0.0105177	0.197386	0.417	0.361	1
Atp6v0d1	0.0105469	-0.321803	0.177	0.218	1
Vps37b	0.0105834	0.390206	0.184	0.146	1
H3f3a	0.0105897	0.443707	0.147	0.113	1
Pex14	0.0105929	-0.364264	0.126	0.163	1
Zfp809	0.0106092	-0.481171	0.14	0.175	1
Pds5b	0.0106129	-0.421584	0.203	0.24	1
Fnip1	0.0106683	-0.158743	0.567	0.618	1
Ndst1	0.0106779	-0.451486	0.168	0.206	1
Gulo	0.0107231	0.943584	0.027	0.013	1
Scarb1	0.0107282	0.2529	0.31	0.263	1
Txnrd2	0.0107916	-0.95572	0.036	0.058	1
Ifngr2	0.0108218	-0.361324	0.149	0.189	1
Pkn1	0.0108247	-0.265654	0.326	0.375	1
Sptssa	0.0108725	1.00973	0.04	0.023	1
Arpc5l	0.0109173	0.752173	0.045	0.026	1
Syncrip	0.0109506	0.270262	0.322	0.276	1
Cd300lg	0.0110359	-4.04746	0.001	0.008	1
Msra	0.0110856	-0.504822	0.117	0.151	1
Adgrl2	0.0111176	-1.06182	0.018	0.035	1
Grsf1	0.0111487	1.0008	0.052	0.032	1
Txndc15	0.011158	0.516851	0.048	0.028	1
Igf1os	0.0111717	0.923258	0.039	0.022	1
Fads2	0.0112133	0.660909	0.044	0.025	1
Bnip2	0.0112796	0.150082	0.253	0.206	1
Tmed2	0.0113202	0.447182	0.107	0.077	1
Mdfic	0.0113232	-0.301146	0.212	0.255	1
Etnppl	0.0113377	1.04984	0.033	0.017	1
Tspan12	0.0113684	1.05695	0.035	0.019	1
Ebpl	0.0114299	1.10585	0.033	0.018	1
Chd7	0.0115982	-0.277967	0.245	0.289	1
Lamp1	0.0116178	0.306519	0.3	0.257	1
Tmem65	0.0116579	-0.338374	0.289	0.331	1
1700037C18Rik	0.0116882	0.514758	0.083	0.057	1
Msmo1	0.0117517	0.76151	0.03	0.015	1
Chd1	0.0118057	0.239188	0.279	0.235	1
Hipk2	0.0118257	-0.237409	0.391	0.438	1
Nedd4l	0.011827	0.145679	0.428	0.374	1
2002-03-01	0.0118387	0.626141	0.071	0.047	1
Rbms2	0.0118417	-0.786602	0.053	0.077	1
Agap1	0.011871	-0.190515	0.234	0.28	1
Rpl36a	0.0119293	0.664292	0.056	0.035	1
Slc38a2	0.0119545	0.379352	0.16	0.124	1
Thap2	0.0119555	-0.734319	0.033	0.055	1
Nucks1	0.0119664	0.379608	0.121	0.089	1
Ehhadh	0.0119807	0.747015	0.033	0.017	1
Ndrg2	0.0119906	0.596227	0.088	0.061	1
Sipa1l3	0.0120127	-0.361274	0.118	0.153	1
1300017J02Rik	0.0120644	0.878799	0.037	0.02	1
Aldh1a7	0.0121408	1.95245	0.013	0.004	1
Larp1	0.0122248	-0.253078	0.293	0.342	1
Tbc1d32	0.0122301	0.331684	0.201	0.162	1
Ppp2r3d	0.0122349	-0.777936	0.057	0.083	1
Sgk3	0.0122484	0.154378	0.589	0.537	1
Mfsd1	0.0122881	0.402827	0.129	0.097	1
Rnf115	0.0123717	-0.297187	0.235	0.277	1
Sem1	0.0123991	0.327781	0.163	0.127	1
Ppp1r2	0.0125107	-0.467286	0.071	0.099	1
Znrf2	0.0126123	-0.367203	0.202	0.241	1
Apoa4	0.0126138	1.44476	0.02	0.008	1
Zfp60	0.0126581	0.605186	0.052	0.032	1
Gm4258	0.0127208	0.214748	0.206	0.164	1
Cyyr1	0.0127951	-2.17665	0.003	0.012	1
Anp32b	0.0128866	0.497395	0.093	0.065	1
Cfb	0.0128892	0.550352	0.073	0.049	1
Rnf25	0.0129181	-0.865328	0.031	0.051	1
Gna13	0.0129812	-0.354961	0.227	0.267	1
Nadsyn1	0.0129911	-0.76013	0.014	0.03	1
Tmem63b	0.0130206	-0.559595	0.058	0.085	1
Fahd1	0.0130233	1.27366	0.02	0.008	1
Ddx17	0.0130999	-0.184106	0.544	0.575	1
Tango2	0.013103	-0.407459	0.104	0.137	1
Tbc1d14	0.0131279	-0.358521	0.228	0.269	1
Adipor1	0.0132553	0.410293	0.172	0.136	1
Erp44	0.0133224	0.339695	0.207	0.168	1
Gm26749	0.0133423	0.498915	0.085	0.059	1
Ccdc6	0.0133503	-0.426932	0.102	0.135	1
Hdac8	0.0133761	-0.298355	0.236	0.279	1
Atp8a1	0.013427	-0.123459	0.757	0.784	1
Ubl3	0.0135731	-0.334004	0.327	0.363	1
Fam13a	0.0135735	-0.508079	0.093	0.124	1
Onecut1	0.0135791	-1.39306	0.009	0.021	1
Psen1	0.0135842	-0.36512	0.189	0.229	1
Rpl6	0.013623	0.392535	0.164	0.13	1
Glis3	0.0136366	-1.1755	0.01	0.023	1
Vti1a	0.0136605	-0.193488	0.567	0.601	1
Btd	0.0137304	-1.26787	0.011	0.024	1
Wars	0.0137478	-0.860059	0.03	0.049	1
Pparg	0.0137504	0.215305	0.203	0.163	1
Ewsr1	0.0138173	0.186417	0.457	0.414	1
Ctdsp1	0.0138331	1.04714	0.042	0.025	1
Mtus1	0.0138337	0.378139	0.306	0.272	1
Slc38a10	0.0138648	-0.533015	0.052	0.077	1
Socs6	0.0139123	-0.645237	0.05	0.074	1
Dusp10	0.0139598	-0.579491	0.086	0.115	1
Ubxn2a	0.0139667	0.979073	0.043	0.025	1
Timm44	0.0139769	-0.496523	0.09	0.12	1
Rbpj	0.0140431	-0.41684	0.107	0.14	1
Bzw2	0.0140731	-0.752095	0.019	0.036	1
Actn1	0.0140731	-0.264524	0.409	0.444	1
Pkn2	0.0140755	0.197354	0.387	0.334	1
Elp2	0.0140947	-0.861527	0.043	0.065	1
Azi2	0.014116	0.306846	0.228	0.19	1
Psmc6	0.0142067	0.332881	0.126	0.094	1
Ankrd28	0.0142984	-0.949519	0.011	0.024	1
Smarcc1	0.0143788	-0.266949	0.135	0.172	1
Pecam1	0.0144256	-0.310348	0.247	0.287	1
Sord	0.0144832	0.674251	0.088	0.063	1
Slc4a2	0.0145592	-0.595178	0.042	0.065	1
Slc5a3	0.0146101	-0.605544	0.057	0.083	1
Arhgap45	0.0146192	-0.387013	0.096	0.127	1
Tmed7	0.0146337	0.583439	0.078	0.054	1
Plekhj1	0.014647	0.592185	0.084	0.059	1
Myl6	0.014734	0.290809	0.134	0.101	1
Dock1	0.0147669	-0.267135	0.341	0.382	1
Iqsec1	0.0147771	-0.662332	0.057	0.082	1
Nudt13	0.0148086	0.331655	0.14	0.106	1
Atrn	0.0148821	-0.30194	0.148	0.187	1
Aup1	0.0149045	-0.407378	0.07	0.098	1
Shpk	0.0149517	1.33926	0.025	0.012	1
Fmo1	0.0149614	2.29674	0.011	0.003	1
Prrc2a	0.0149709	-0.403031	0.105	0.137	1
Ndufb8	0.014984	0.823932	0.041	0.024	1
Tspan14	0.0150336	-0.470202	0.159	0.193	1
Slc22a15	0.0150494	2.01617	0.011	0.003	1
Zfp217	0.0150622	0.36627	0.147	0.113	1
Idnk	0.0150636	0.467305	0.11	0.081	1
Robo4	0.0150696	-4.79936	0	0.006	1
Nsd3	0.0150752	0.207088	0.517	0.485	1
Pdgfrl	0.0151666	0.445373	0.022	0.01	1
0610005C13Rik	0.0152095	0.827983	0.043	0.025	1
Zfp266	0.0152351	-0.71436	0.054	0.078	1
Ift52	0.0152602	-0.590464	0.039	0.061	1
Mst1	0.0152807	-2.12892	0.002	0.01	1
Pcmtd1	0.0152885	0.231022	0.313	0.267	1
Gm43189	0.0152981	-1.84833	0.002	0.01	1
Nrn1	0.01534	0.828275	0.023	0.011	1
Akr1c14	0.0153867	1.24773	0.033	0.018	1
Gm49961	0.015422	1.08981	0.025	0.012	1
2810403D21Rik	0.0154718	0.784197	0.042	0.025	1
Slc19a2	0.015481	1.14832	0.025	0.012	1
Nup155	0.0154999	0.564221	0.08	0.056	1
Pdia4	0.0156717	0.45936	0.066	0.044	1
Smc6	0.015715	-0.325796	0.167	0.205	1
Usp24	0.0157245	-0.281219	0.229	0.269	1
Cep85	0.0158255	0.293767	0.182	0.145	1
Zranb3	0.0158437	-1.15526	0.015	0.03	1
Dmxl2	0.0158457	0.421683	0.096	0.068	1
Isca2	0.0158534	0.958648	0.036	0.02	1
Pkm	0.0158952	-0.413868	0.102	0.134	1
Rmdn3	0.0159024	-0.681098	0.026	0.044	1
Mup14	0.0159305	1.22426	0.015	0.006	1
Mllt6	0.0159306	-0.55779	0.05	0.074	1
Tor1aip1	0.0159982	0.272138	0.38	0.339	1
Csf1	0.0160226	2.58973	0.008	0.001	1
Tmbim4	0.0160302	0.37676	0.106	0.078	1
Hmgxb4	0.0160625	-0.572607	0.062	0.088	1
Ptms	0.0161597	0.475139	0.084	0.059	1
Grk2	0.0162133	-0.244005	0.284	0.325	1
Brpf1	0.0162791	0.262901	0.119	0.088	1
Arg1	0.0162855	0.550138	0.082	0.058	1
Mettl26	0.0163103	1.10672	0.031	0.016	1
Rab8a	0.0164004	-0.852336	0.028	0.046	1
P4ha1	0.0164058	0.230362	0.381	0.337	1
Rnf167	0.0164453	0.494367	0.102	0.075	1
Rps6	0.0164743	0.427469	0.119	0.089	1
Cpb2	0.0164863	0.899036	0.027	0.013	1
Skp1a	0.0164929	0.686343	0.06	0.039	1
Ppp6r3	0.0165022	-0.25072	0.372	0.413	1
Aim2	0.0165064	0.207788	0.392	0.349	1
Cep85l	0.0165148	-0.472934	0.167	0.201	1
Fyb2	0.0165423	-4.35315	0.001	0.008	1
Eci2	0.0165536	-0.508199	0.062	0.088	1
Rerg	0.0166067	-3.74955	0.001	0.008	1
Prpf18	0.0166596	0.341798	0.108	0.079	1
Acin1	0.016691	-0.251441	0.305	0.346	1
Rtp4	0.0167003	0.322279	0.202	0.165	1
Creb3l3	0.0167307	0.686957	0.034	0.019	1
Lhpp	0.0168593	-0.473924	0.036	0.058	1
Tbc1d9b	0.0169924	-0.457134	0.089	0.118	1
Nudcd3	0.0170857	-0.251676	0.259	0.301	1
Creb3l2	0.0170922	-0.299152	0.207	0.248	1
Morrbid	0.0171399	-0.20261	0.321	0.363	1
Atxn10	0.0171746	-0.520379	0.111	0.143	1
Dhtkd1	0.0172161	1.1198	0.016	0.006	1
Atp5d	0.0172662	0.676657	0.067	0.045	1
Fndc3a	0.017326	-0.211556	0.582	0.606	1
Rpl34	0.0173951	0.455665	0.114	0.085	1
Nup93	0.0174494	-0.537206	0.068	0.094	1
0610040J01Rik	0.0174977	-0.272529	0.156	0.193	1
Hmgb1	0.0174983	0.40662	0.134	0.102	1
Wbp1l	0.0175208	-0.351489	0.22	0.258	1
Dglucy	0.0175471	0.421258	0.141	0.11	1
Apbb2	0.0175485	-1.20672	0.006	0.016	1
Prr16	0.0176689	-0.889538	0.034	0.054	1
Rnd3	0.0176948	-1.63624	0.007	0.018	1
Ugt2b34	0.0177276	0.615865	0.028	0.014	1
Sppl3	0.0177568	-0.308694	0.277	0.315	1
Glyat	0.017819	0.514127	0.038	0.022	1
Med15	0.0178552	-0.245998	0.28	0.321	1
Spata13	0.0179088	-0.570614	0.066	0.092	1
Epb41	0.0179173	-0.331623	0.285	0.32	1
Pinx1	0.0179293	-0.763114	0.035	0.056	1
Pan2	0.017966	-0.485161	0.06	0.085	1
Zbtb7b	0.0180501	0.671202	0.064	0.043	1
Efna5	0.0180616	-1.11473	0.007	0.018	1
Ndufs5	0.0181228	0.879776	0.055	0.036	1
Mamld1	0.018123	-0.544357	0.078	0.106	1
Tomm6	0.0181282	0.809514	0.056	0.037	1
Cnppd1	0.0181759	0.319971	0.086	0.061	1
Il4ra	0.0181839	-0.369248	0.066	0.093	1
Cdadc1	0.0183147	-0.610733	0.057	0.082	1
Map3k13	0.0183937	-1.26579	0.01	0.022	1
Cdc42	0.0184488	0.173984	0.554	0.508	1
Sap25	0.0184831	-0.329136	0.209	0.249	1
Thrap3	0.0185186	0.261429	0.382	0.341	1
Pgap1	0.0185537	0.256402	0.348	0.307	1
Arf3	0.0185895	-0.527892	0.098	0.127	1
Fus	0.0186401	0.156951	0.539	0.484	1
B3galt1	0.0186414	-0.735935	0.033	0.052	1
Per1	0.0186437	-0.364826	0.083	0.113	1
Psmd14	0.0186664	-0.369859	0.219	0.256	1
C330002G04Rik	0.0187038	1.13144	0.017	0.007	1
Creb1	0.0187081	0.280688	0.394	0.353	1
Itih4	0.0187268	0.656375	0.057	0.037	1
4930581F22Rik	0.0187271	0.347841	0.158	0.125	1
Gng5	0.0187922	0.692985	0.064	0.043	1
Herc1	0.018814	0.116742	0.702	0.649	1
Dgkz	0.018962	-0.245302	0.344	0.383	1
Mccc1	0.0191406	-0.732923	0.026	0.044	1
Mlxipl	0.0191906	-0.783435	0.026	0.044	1
Atad2b	0.0192032	0.250226	0.319	0.276	1
Dst	0.0192276	0.133166	0.513	0.453	1
Tmem259	0.0192737	-0.419475	0.113	0.144	1
Uchl3	0.0192901	-0.687197	0.045	0.067	1
Arap2	0.0193213	0.199327	0.457	0.422	1
Gm42917	0.0193409	0.407089	0.15	0.119	1
Zrsr2	0.0193679	0.458363	0.145	0.116	1
Hoga1	0.0194276	1.47134	0.018	0.008	1
Txlna	0.0194981	-0.652105	0.052	0.075	1
Utp20	0.0196495	-0.666873	0.056	0.08	1
Coq10b	0.0197174	-0.698576	0.047	0.069	1
Klf10	0.0197196	0.335524	0.138	0.106	1
Nsmaf	0.0197479	0.372467	0.22	0.187	1
Xrn2	0.0197951	0.223921	0.483	0.449	1
Pttg1	0.0198451	0.706484	0.044	0.027	1
Sec14l1	0.0199334	0.28951	0.225	0.189	1
Lmbr1l	0.0199509	-0.683455	0.032	0.051	1
Dnajc7	0.0201249	-0.259449	0.314	0.359	1
Polr2b	0.020268	-0.604116	0.043	0.065	1
Gm33543	0.0203188	3.09381	0.006	0.001	1
Rps2	0.020322	0.400452	0.15	0.118	1
Zfp871	0.0204704	-0.245896	0.248	0.289	1
Cep68	0.0204753	0.638627	0.107	0.081	1
Thrsp	0.0205167	-0.932357	0.024	0.041	1
Evl	0.0206149	-0.235055	0.401	0.432	1
Ccl25	0.0206417	-0.378346	0.098	0.128	1
Sgpl1	0.020645	-0.301769	0.32	0.361	1
Gm48765	0.020737	0.554261	0.076	0.054	1
Aig1	0.0207379	-0.293469	0.295	0.335	1
Vps35l	0.0207583	-0.287183	0.199	0.235	1
Rbm28	0.0208754	0.325475	0.164	0.132	1
Ccdc117	0.0209799	-0.994051	0.029	0.046	1
Ssh2	0.0209932	-0.133748	0.805	0.835	1
4931406P16Rik	0.0210709	-0.518859	0.094	0.122	1
Rab2a	0.0211016	-0.294481	0.314	0.353	1
Tap2	0.0211357	0.499553	0.086	0.062	1
Mvb12a	0.0212113	-0.907155	0.03	0.048	1
Amy1	0.0212403	0.796911	0.065	0.044	1
Gigyf1	0.0212447	-0.461062	0.097	0.126	1
Nsun3	0.0212921	0.552245	0.061	0.041	1
Dctn2	0.0214008	-0.404683	0.07	0.096	1
C130074G19Rik	0.0214144	1.45455	0.012	0.004	1
Mon1a	0.0215041	-0.722936	0.038	0.058	1
Nol7	0.0215164	0.674657	0.041	0.025	1
Gstt1	0.0216291	0.966902	0.012	0.004	1
4930565N06Rik	0.0216389	1.42152	0.021	0.01	1
Nup214	0.0216545	-0.377803	0.121	0.154	1
Ankrd17	0.0217611	-0.128106	0.602	0.642	1
Drg1	0.0217994	0.217205	0.169	0.135	1
Lman1	0.0219389	0.441235	0.08	0.057	1
Zfp207	0.0219697	0.146081	0.42	0.368	1
Mal2	0.0219997	2.13724	0.009	0.002	1
Gclm	0.0220172	0.408149	0.099	0.073	1
Ugt2b1	0.0220653	0.855745	0.05	0.032	1
Uqcc1	0.0220791	-0.460996	0.094	0.122	1
Napg	0.0221311	0.327178	0.168	0.135	1
Sbf2	0.0221445	-0.0972884	0.793	0.801	1
Rbms1	0.0221569	-0.158325	0.592	0.628	1
Wiz	0.022265	0.582103	0.062	0.042	1
Dnajc22	0.0223319	1.22094	0.009	0.002	1
9030616G12Rik	0.0223598	1.24888	0.009	0.002	1
Gulp1	0.0223869	-1.94368	0.002	0.009	1
Map3k4	0.0224508	-0.412051	0.099	0.129	1
Sco2	0.0224703	1.00578	0.021	0.01	1
Arid4a	0.0224732	0.19141	0.382	0.345	1
Myef2	0.0225263	-0.411023	0.069	0.095	1
Fkbp1a	0.0225417	0.627426	0.039	0.023	1
Ndufb1-ps	0.0225582	0.562627	0.061	0.041	1
Rps4x	0.0225792	0.651977	0.088	0.064	1
Lrrc45	0.0227765	-0.502069	0.062	0.087	1
C2cd2	0.0227792	0.436372	0.102	0.076	1
Zbtb7c	0.0227977	-0.76298	0.013	0.027	1
Cluh	0.0228222	-0.681928	0.074	0.099	1
Canx	0.0228404	0.280887	0.365	0.334	1
Zfp951	0.0228703	-0.397561	0.168	0.201	1
Rpl7	0.0229628	0.458223	0.087	0.063	1
4930453N24Rik	0.0229807	0.597376	0.039	0.023	1
Jag1	0.0230134	-5.05921	0	0.005	1
Plppr1	0.0230134	-5.55396	0	0.005	1
Mamdc2	0.0230134	-5.03852	0	0.005	1
Tm6sf1	0.0230531	-0.230755	0.337	0.378	1
Dars	0.0231063	-0.426463	0.118	0.149	1
Prrc2b	0.023171	0.20832	0.12	0.09	1
Mrpl53	0.0231751	0.861758	0.047	0.03	1
Traf3	0.0232282	-0.42071	0.154	0.187	1
Rsrc2	0.0232459	0.109148	0.351	0.299	1
Pde4a	0.0233221	0.30213	0.15	0.119	1
Pex2	0.0234222	0.437658	0.107	0.08	1
Shfl	0.0234237	-0.4443	0.075	0.101	1
Ick	0.0235184	0.427407	0.075	0.052	1
Agmat	0.0236859	1.70163	0.013	0.005	1
Cps1	0.0237093	0.216918	0.268	0.226	1
Tmcc3	0.0237588	-0.102643	0.865	0.882	1
Pex11g	0.0238195	1.50459	0.013	0.005	1
Lnpep	0.0238466	-0.125827	0.703	0.726	1
Atp13a1	0.0238707	-0.272216	0.094	0.124	1
Pnisr	0.0239024	0.189387	0.541	0.509	1
Ccdc66	0.0239075	0.427782	0.086	0.062	1
Ctnnd1	0.0239166	-0.116755	0.732	0.742	1
Gm35188	0.0241346	0.464286	0.146	0.117	1
Ddah1	0.024176	0.813934	0.023	0.011	1
Ell	0.0241857	-0.444405	0.057	0.081	1
Slc22a1	0.0242541	1.05871	0.026	0.013	1
Ubash3b	0.0243052	0.166792	0.339	0.289	1
Psmf1	0.0243203	-1.12727	0.016	0.03	1
Lars	0.0243424	-0.334145	0.133	0.165	1
Mgat1	0.024435	-0.435108	0.076	0.101	1
Tmem161b	0.0244503	-0.338751	0.151	0.185	1
Uox	0.0245647	0.299082	0.137	0.107	1
Bicd2	0.0246911	-0.622107	0.047	0.068	1
Rwdd4a	0.0246964	0.723566	0.031	0.017	1
Arid1b	0.0247063	-0.263537	0.438	0.466	1
Eif2ak4	0.0248381	-0.390259	0.166	0.202	1
Hsd17b4	0.0248482	0.271912	0.271	0.232	1
Mettl23	0.0248588	0.661033	0.087	0.064	1
Pde8b	0.0248773	0.612976	0.089	0.065	1
Pcdh7	0.0249134	-3.1819	0.001	0.007	1
Snap23	0.0249147	-0.236231	0.374	0.412	1
Tbc1d30	0.0249454	-3.8107	0.001	0.007	1
Xaf1	0.0249567	0.308723	0.134	0.104	1
Sox5	0.0250014	-0.801651	0.031	0.049	1
Tmem56	0.0250649	0.426266	0.074	0.051	1
Mrpl18	0.025075	0.729756	0.029	0.015	1
Lrig3	0.025163	-0.995773	0.01	0.021	1
Abcb7	0.0251705	0.272108	0.186	0.154	1
Ppfia2	0.0252027	-1.88646	0.001	0.007	1
Etfbkmt	0.0255172	-0.57964	0.021	0.037	1
Qdpr	0.0255737	0.605001	0.046	0.029	1
Rpl23a	0.0256104	0.759622	0.052	0.034	1
Srgn	0.0256376	0.721842	0.078	0.056	1
Gnptab	0.0257343	-0.481529	0.086	0.113	1
Stat5a	0.0257798	-0.726971	0.021	0.037	1
Stt3a	0.0257813	0.189902	0.162	0.128	1
Fam76a	0.025879	-0.525423	0.05	0.072	1
Slc35e2	0.0259675	0.598215	0.068	0.047	1
F13b	0.0260563	1.36045	0.014	0.006	1
Tbc1d4	0.0261223	-0.304731	0.144	0.176	1
Tet2	0.0261897	0.234461	0.288	0.246	1
Strbp	0.0262297	0.386132	0.172	0.14	1
Dusp1	0.02625	-0.337471	0.223	0.259	1
Slc25a47	0.0263151	0.352528	0.08	0.057	1
Pla2r1	0.0263572	-1.82526	0.003	0.011	1
Gata4	0.0264099	-2.024	0.003	0.011	1
Dhrs3	0.0264941	0.352541	0.138	0.108	1
H2-Q7	0.0265615	0.409159	0.12	0.093	1
Ppp1r15b	0.0265796	0.603966	0.067	0.046	1
Mpnd	0.0266175	-0.621304	0.016	0.03	1
Kcnab1	0.0266983	0.664867	0.067	0.046	1
Pcnx	0.0267803	0.511011	0.094	0.069	1
Odf2l	0.0267965	0.447154	0.064	0.044	1
Slc49a4	0.0268398	-0.270422	0.185	0.221	1
Dram2	0.0268442	0.183429	0.577	0.544	1
Atxn7	0.0268881	-0.199389	0.425	0.463	1
Rps11	0.027051	0.334742	0.117	0.089	1
Extl3	0.0271967	-0.219332	0.193	0.23	1
Riok2	0.0273599	0.533481	0.102	0.077	1
Ggnbp2	0.0274221	0.261218	0.381	0.349	1
Ascc1	0.0276149	0.35837	0.076	0.054	1
Slc25a36	0.0276438	0.166983	0.408	0.364	1
Ms4a4d	0.0276633	1.69056	0.01	0.003	1
Hnrnph3	0.0276882	-0.347751	0.1	0.13	1
Tnfrsf1a	0.0276987	0.313044	0.112	0.085	1
Akap13	0.0277236	-0.137863	0.402	0.439	1
Gpatch2l	0.0277416	0.250288	0.163	0.13	1
Aldh1l1	0.027842	0.298506	0.073	0.051	1
Srrt	0.0279065	-0.347524	0.102	0.132	1
Tlr4	0.0279244	0.230423	0.28	0.242	1
Sympk	0.027996	-0.338371	0.069	0.094	1
Ptpn11	0.0280471	-0.50926	0.06	0.084	1
Scly	0.0280506	-0.35514	0.061	0.085	1
Zfp1	0.0280681	-0.475917	0.027	0.044	1
Adgrl1	0.0281115	1.25165	0.015	0.006	1
Tm9sf2	0.0281814	0.232383	0.285	0.249	1
Tmem106a	0.0283256	0.240505	0.209	0.175	1
Acvr2a	0.0283349	0.223092	0.227	0.187	1
Kansl1l	0.0283694	0.131774	0.419	0.372	1
Tmpo	0.0283912	0.325165	0.14	0.11	1
B3galnt2	0.0284045	-0.533902	0.057	0.08	1
Slc26a1	0.0284917	1.29388	0.015	0.006	1
4930455C13Rik	0.0285114	1.12738	0.037	0.023	1
Rer1	0.0286164	0.581253	0.064	0.044	1
Ercc6l2	0.0286555	0.428784	0.101	0.076	1
Wbp11	0.0286934	0.357754	0.087	0.063	1
Arsb	0.0287913	0.848287	0.049	0.032	1
Zc3h8	0.0288735	0.451081	0.052	0.034	1
Med25	0.0289418	0.609083	0.051	0.033	1
9130016M20Rik	0.0289722	1.62789	0.016	0.007	1
Bub3	0.0289902	0.552535	0.065	0.045	1
Rspry1	0.0290138	-0.370657	0.185	0.217	1
Ust	0.0290998	-0.203674	0.528	0.561	1
Abca6	0.0292601	0.602741	0.04	0.025	1
Wdr81	0.0294218	-0.431368	0.051	0.073	1
Zfp710	0.0294357	0.105645	0.635	0.587	1
Cyp4a14	0.0294422	1.46919	0.016	0.007	1
Brwd3	0.0295224	0.26914	0.192	0.158	1
Nup98	0.0296198	-0.238825	0.302	0.342	1
Casp7	0.0296236	-0.346549	0.075	0.1	1
Vps26a	0.0297409	-0.426301	0.15	0.181	1
Tiparp	0.0297875	0.392849	0.185	0.156	1
Ncoa4	0.0299205	0.269353	0.206	0.17	1
Mtcp1	0.029932	-0.834617	0.013	0.026	1
9530026P05Rik	0.029942	-1.37064	0.004	0.012	1
Atg16l1	0.0300547	-0.385474	0.145	0.177	1
Txndc11	0.0300996	0.283232	0.223	0.187	1
Eif4g2	0.0301197	0.331302	0.218	0.183	1
Ago2	0.0301374	-0.30389	0.12	0.151	1
Rcc1l	0.0302058	-0.824041	0.028	0.044	1
Arhgap25	0.0302319	-0.191561	0.442	0.472	1
Pla2g6	0.0303333	1.06996	0.033	0.02	1
Dynll2	0.0304047	0.895399	0.035	0.021	1
Cacul1	0.0304407	-0.240629	0.234	0.269	1
Arhgap32	0.0304494	-1.06045	0.017	0.031	1
Atp5a1	0.0305559	0.485019	0.107	0.082	1
Rps8	0.0306068	0.295316	0.194	0.162	1
Slc4a1ap	0.0306713	0.549503	0.063	0.044	1
Ctsa	0.0309301	-0.242443	0.321	0.356	1
Arhgef7	0.0309542	-0.382385	0.073	0.097	1
Prkdc	0.0309672	-0.175121	0.168	0.205	1
Acap2	0.0310103	-0.157784	0.486	0.532	1
Zfp950	0.0310748	0.214535	0.25	0.211	1
Serinc1	0.0311936	0.211978	0.152	0.12	1
Zfp369	0.0312666	-0.683554	0.048	0.068	1
Gpat4	0.031295	0.583234	0.066	0.046	1
Vps36	0.0313328	0.429661	0.058	0.039	1
Lims1	0.031351	-0.29804	0.256	0.288	1
Sdc4	0.031356	0.757823	0.061	0.042	1
Trib1	0.0314764	0.575829	0.047	0.03	1
Arl15	0.031481	-0.156187	0.394	0.431	1
Daam1	0.0314996	-0.349701	0.121	0.151	1
Rps13	0.031554	0.416564	0.088	0.065	1
Id2	0.0316669	0.305773	0.116	0.089	1
Alkbh3	0.0317809	-0.519846	0.049	0.07	1
Smndc1	0.0317831	0.623538	0.062	0.043	1
Xpr1	0.031839	-0.157395	0.36	0.403	1
Ilf3	0.0319291	-0.543111	0.061	0.084	1
Txn1	0.0320127	0.285843	0.141	0.111	1
Tle1	0.0320249	-0.261401	0.161	0.195	1
Cd99l2	0.0320331	1.03834	0.032	0.018	1
Eda	0.0320499	-0.848254	0.024	0.039	1
Lsr	0.0320923	1.35542	0.018	0.008	1
Zfand5	0.032099	0.218931	0.227	0.19	1
A630001G21Rik	0.0322008	-0.289338	0.201	0.235	1
Kalrn	0.0322482	-1.75039	0.006	0.015	1
Bmt2	0.0323662	0.171279	0.272	0.23	1
Tep1	0.0323827	0.220112	0.376	0.332	1
Gm34667	0.0324325	1.43513	0.011	0.004	1
Sft2d1	0.0324439	0.266952	0.152	0.121	1
Stk39	0.0324478	0.274938	0.153	0.123	1
Hspa8	0.0324867	0.189117	0.229	0.193	1
Gigyf2	0.0325412	-0.213781	0.324	0.364	1
Atxn1	0.0326344	-0.122542	0.668	0.687	1
Tjp1	0.032708	-1.76134	0.008	0.018	1
Inhba	0.0327099	-2.34376	0.002	0.008	1
Csad	0.032778	0.675955	0.066	0.046	1
Tbx3os1	0.0328177	-1.97775	0.002	0.008	1
Cep290	0.0328411	0.299406	0.205	0.171	1
Slc1a2	0.0329131	0.411328	0.081	0.059	1
Zfp292	0.0329526	-0.206187	0.359	0.392	1
Opa1	0.0330755	-0.175716	0.194	0.23	1
Phc2	0.0330858	-0.258272	0.288	0.323	1
Tacc2	0.0333112	-0.590842	0.024	0.039	1
Ppp1r21	0.033313	0.294019	0.203	0.17	1
Gfra1	0.0333178	-0.714622	0.02	0.035	1
Rpl41	0.0333193	0.295314	0.207	0.173	1
Pcca	0.0333237	-0.337552	0.278	0.306	1
Gstp1	0.0333415	0.958715	0.03	0.017	1
Kdm6a	0.0334069	0.226919	0.365	0.325	1
A430090L17Rik	0.0335138	1.09068	0.019	0.009	1
Chrm3	0.0335573	-1.2745	0.007	0.016	1
Nf2	0.0335929	-0.281834	0.092	0.118	1
Sltm	0.0336061	-0.20287	0.347	0.382	1
Atp5l	0.03368	0.402658	0.106	0.082	1
Fbxw4	0.0337235	0.209796	0.218	0.184	1
Parp3	0.0337982	0.435666	0.077	0.056	1
Prex2	0.0338022	-1.06308	0.008	0.018	1
Babam2	0.033987	-0.186236	0.391	0.429	1
Tmed9	0.0340072	0.527145	0.057	0.039	1
Lrch3	0.0340194	-0.215473	0.301	0.337	1
9030622O22Rik	0.0340684	-0.894338	0.019	0.033	1
Arhgef11	0.0340969	0.225433	0.298	0.264	1
Pon2	0.0344491	0.324127	0.162	0.13	1
Gm10563	0.0344583	1.02566	0.026	0.014	1
Zfp839	0.0346715	-0.467379	0.048	0.068	1
Klhl9	0.0346875	0.552493	0.098	0.075	1
Lrrc39	0.0348287	0.934639	0.024	0.013	1
Blvrb	0.034932	0.177836	0.342	0.306	1
Kng2	0.0349455	0.830126	0.026	0.014	1
Sri	0.03496	-0.467902	0.038	0.057	1
Msn	0.034977	0.112685	0.502	0.454	1
Agxt	0.0351651	0.947455	0.026	0.014	1
Cpeb4	0.0352334	0.088661	0.334	0.289	1
Adamts9	0.0353688	-4.84752	0	0.004	1
Adra1a	0.0353688	-4.96491	0	0.004	1
Sncaip	0.0353688	-5.01794	0	0.004	1
Ncstn	0.0354111	0.419789	0.111	0.086	1
Uhrf1bp1l	0.0354685	0.442426	0.083	0.061	1
Snrpf	0.0354746	1.05787	0.024	0.013	1
Itpk1	0.0355025	-0.294336	0.189	0.225	1
Acox2	0.0355327	0.657865	0.022	0.011	1
Gm43813	0.0356401	-0.367227	0.089	0.115	1
Pdpk1	0.0357403	-0.245321	0.159	0.194	1
Cyp2c68	0.0359965	0.745275	0.024	0.013	1
Pum2	0.0361105	-0.20969	0.463	0.487	1
Phf11c	0.0362377	0.603446	0.026	0.014	1
Blcap	0.0363755	-0.642993	0.022	0.037	1
Rbm10	0.0363912	-0.366962	0.039	0.058	1
Calr	0.0363966	0.218974	0.203	0.169	1
Man1b1	0.0365495	-0.630545	0.036	0.054	1
Depp1	0.0365909	1.49106	0.011	0.004	1
Epg5	0.0366136	-0.526336	0.1	0.126	1
Tor1a	0.0366493	0.523598	0.07	0.05	1
Shroom4	0.0366506	-0.62568	0.018	0.032	1
Pfdn5	0.0368022	0.358791	0.067	0.047	1
Cbx3	0.0368556	0.600136	0.068	0.049	1
Kcmf1	0.0371027	-0.152059	0.324	0.366	1
Rnasel	0.0371358	0.211965	0.159	0.128	1
Ttpa	0.037288	0.395214	0.043	0.027	1
Tspan31	0.0373504	-0.819108	0.033	0.049	1
Cttnbp2nl	0.0373576	-0.192139	0.289	0.326	1
Ptma	0.0374281	0.270623	0.164	0.135	1
Arih1	0.0375164	-0.169446	0.552	0.573	1
Gm31121	0.0375652	-3.55936	0.001	0.006	1
Mettl25	0.0376319	0.42594	0.1	0.077	1
Dync1h1	0.0376332	-0.376195	0.207	0.238	1
9530068E07Rik	0.0376658	0.509949	0.051	0.034	1
Scara5	0.0377086	-2.71772	0.001	0.006	1
Daam2	0.0377086	-2.98704	0.001	0.006	1
Peli1	0.0377147	0.0695252	0.686	0.634	1
Rhobtb1	0.0377594	0.140284	0.366	0.323	1
Rbfa	0.0377829	0.48845	0.058	0.04	1
Inhbc	0.0378045	-2.48674	0.001	0.006	1
Cep250	0.0378435	0.445367	0.101	0.078	1
Btaf1	0.0378498	0.131868	0.496	0.455	1
Mir100hg	0.0379006	-1.56825	0.001	0.006	1
Cops7b	0.0379343	0.51498	0.042	0.027	1
Lama4	0.0379487	-1.48671	0.001	0.006	1
Ankib1	0.0380562	-0.181115	0.223	0.263	1
2008-03-01	0.0381669	-0.252528	0.126	0.156	1
Trafd1	0.0382286	0.128086	0.507	0.467	1
Mbd5	0.0382983	-0.235017	0.498	0.528	1
Atp6v1g1	0.0383859	0.533331	0.08	0.059	1
Lpar6	0.03844	0.306026	0.176	0.146	1
Scfd1	0.0385467	-0.240331	0.152	0.185	1
Wdr91	0.0385508	-0.461256	0.047	0.067	1
Insig1	0.0387429	0.562933	0.07	0.05	1
Mtmr12	0.0387949	-0.687288	0.04	0.058	1
Mical3	0.0388909	-0.884574	0.02	0.034	1
Nat8f2	0.0388996	0.418649	0.041	0.026	1
Rpl18a	0.0389124	0.46095	0.128	0.102	1
Elmo1	0.0391061	-0.10258	0.772	0.804	1
Trp53inp2	0.0391117	0.465936	0.041	0.026	1
Gcnt7	0.0391437	0.316816	0.052	0.035	1
Ces3b	0.0391759	-0.96151	0.02	0.034	1
Tirap	0.0392261	0.279257	0.051	0.034	1
2001-03-01	0.0392978	-0.120468	0.678	0.708	1
Nars	0.0395365	0.428359	0.147	0.12	1
Zmiz1	0.0395617	0.150935	0.213	0.177	1
Nup160	0.0396354	-0.558712	0.045	0.064	1
Ap3m1	0.0396616	0.265082	0.129	0.101	1
Golga7	0.0396722	0.537478	0.076	0.056	1
Dalrd3	0.0397375	-0.557828	0.072	0.094	1
Fig4	0.0398388	-0.348168	0.075	0.099	1
F11	0.0398676	1.53349	0.012	0.005	1
Alkbh1	0.0400771	0.37106	0.163	0.135	1
Astn2	0.040079	-0.791466	0.012	0.024	1
BC028777	0.040153	1.50945	0.012	0.005	1
Dnajc13	0.0402012	-0.177927	0.431	0.465	1
Irf1	0.0402329	0.325523	0.2	0.17	1
Tfdp2	0.0403479	0.544759	0.081	0.061	1
Wbp4	0.040382	0.402639	0.096	0.073	1
Serf2	0.0403934	0.324165	0.162	0.134	1
Ppp2r2a	0.0404874	-0.193953	0.273	0.312	1
Katnbl1	0.0405996	0.411386	0.111	0.087	1
Acadl	0.0408128	0.566862	0.081	0.061	1
Ikbkb	0.0408268	-0.219461	0.241	0.279	1
Abhd12	0.0409634	-0.187612	0.394	0.439	1
Eml6	0.0411337	0.2796	0.307	0.268	1
Snx27	0.0411421	-0.27673	0.195	0.225	1
Mfsd8	0.0413093	-0.647111	0.03	0.046	1
Anapc10	0.0414172	-0.250605	0.118	0.147	1
Ubr1	0.0414413	-0.261126	0.167	0.198	1
Clptm1	0.0414856	-0.654257	0.05	0.069	1
Mpp5	0.0415132	0.30091	0.131	0.105	1
Rps17	0.0416122	0.301946	0.087	0.065	1
Ephx2	0.0416417	0.343153	0.05	0.033	1
Slf2	0.0416446	-0.319005	0.219	0.25	1
Shank2	0.0417356	-1.29946	0.004	0.011	1
Caprin1	0.0417939	-0.173747	0.365	0.405	1
Paics	0.0418084	0.813736	0.045	0.03	1
Notch2	0.0419804	-0.219856	0.279	0.31	1
Phospho2	0.0419941	0.852918	0.044	0.029	1
Rps3	0.0419953	0.390847	0.074	0.054	1
Sucnr1	0.0420004	1.22532	0.008	0.002	1
Npepps	0.0420169	0.185221	0.24	0.206	1
Wwp1	0.0420437	0.153501	0.571	0.521	1
Man1c1	0.0422028	-0.247722	0.195	0.23	1
Crem	0.0423916	-0.634597	0.054	0.074	1
Pi4ka	0.042519	-0.354252	0.132	0.161	1
Gm36251	0.0425609	1.95616	0.005	0.001	1
Slc17a8	0.0425609	1.94141	0.005	0.001	1
Pam	0.0429558	-1.18756	0.01	0.02	1
Lrp6	0.0430172	0.0789769	0.467	0.415	1
Arid3b	0.0430193	0.44537	0.079	0.059	1
Rnf213	0.0430513	0.129157	0.705	0.66	1
Slc35b3	0.0430838	0.248354	0.119	0.094	1
Suclg1	0.0430917	0.254118	0.064	0.045	1
Cpt1a	0.0433503	-0.35258	0.156	0.185	1
Pqlc2	0.0433562	1.11634	0.031	0.018	1
2810459M11Rik	0.0435468	3.96051	0.003	0	1
Tmc7	0.0435468	5.16651	0.003	0	1
4930544F09Rik	0.0435468	4.19331	0.003	0	1
Dennd3	0.0435468	4.15381	0.003	0	1
Iffo1	0.0437572	-0.353424	0.084	0.108	1
Acadvl	0.043779	0.817369	0.034	0.021	1
Atp6v1c1	0.0438405	-0.508268	0.092	0.116	1
Glmn	0.0438629	0.445753	0.054	0.037	1
Ilrun	0.0440157	-0.327444	0.162	0.192	1
D5Ertd579e	0.0442319	0.217848	0.4	0.362	1
Desi1	0.044361	-0.586049	0.029	0.044	1
Ncbp1	0.0443666	-0.656622	0.036	0.054	1
Fbh1	0.0444204	-0.330094	0.15	0.179	1
Usp48	0.0444412	-0.310109	0.291	0.323	1
Tmem106b	0.0445327	0.451355	0.081	0.061	1
Gsdmd	0.0445556	-0.377778	0.176	0.204	1
Ganc	0.0447368	0.261255	0.165	0.136	1
Tmem258	0.04475	0.776954	0.043	0.028	1
Elavl1	0.0447821	0.201172	0.191	0.158	1
Ets1	0.0450066	-0.702623	0.028	0.043	1
Nhej1	0.0450636	-0.467099	0.032	0.048	1
Psma2	0.0451212	0.413389	0.082	0.061	1
Mlec	0.045133	0.532404	0.051	0.035	1
Eif1a	0.0452632	0.245117	0.085	0.063	1
Rab5b	0.0452658	0.461283	0.118	0.094	1
Plcl2	0.0455311	0.122064	0.609	0.568	1
Ankrd27	0.0455658	-0.48413	0.063	0.085	1
Hexb	0.0457473	-0.444211	0.169	0.196	1
Hmbox1	0.0457631	-0.207863	0.339	0.373	1
Fam168a	0.0458925	-0.20344	0.304	0.338	1
Zswim8	0.0459249	0.269153	0.196	0.165	1
Trim47	0.0461443	0.243669	0.103	0.08	1
Frrs1	0.0461502	-0.157367	0.257	0.295	1
Secisbp2l	0.0461588	0.235021	0.196	0.163	1
Sesn1	0.0462251	0.137441	0.252	0.215	1
Ddx60	0.0463833	0.124879	0.712	0.687	1
Abcg1	0.04654	-0.16901	0.253	0.29	1
Irf3	0.0465506	-0.199654	0.108	0.137	1
Cdk8	0.0465529	-0.253804	0.266	0.302	1
Ubn2	0.0466889	-0.169208	0.449	0.474	1
Rps6ka3	0.0467025	0.203836	0.35	0.313	1
Oasl2	0.0467167	0.275729	0.199	0.169	1
Atp5e	0.0468143	0.742252	0.066	0.048	1
Dennd1b	0.0470253	0.123087	0.696	0.644	1
Pias1	0.0471063	-0.110837	0.667	0.692	1
Dnajc15	0.0473126	0.242062	0.161	0.132	1
Tmem230	0.0475832	0.655155	0.05	0.034	1
Wdr3	0.0476687	-0.410987	0.075	0.097	1
Stk19	0.0476754	-0.514227	0.069	0.091	1
Cmtr1	0.0477023	0.262494	0.157	0.127	1
Rnpepl1	0.0477109	-0.590064	0.075	0.096	1
Trak1	0.0477629	-0.217773	0.204	0.236	1
Sorbs3	0.0478162	-2.30206	0.002	0.008	1
Nckap1l	0.0478399	0.187877	0.478	0.445	1
Cpne2	0.0478511	0.608374	0.056	0.039	1
Srebf1	0.0479756	0.772286	0.04	0.026	1
Nhsl2	0.0481769	-1.99002	0.002	0.008	1
Ddx10	0.0482058	-0.192898	0.223	0.258	1
Lipg	0.0482286	-1.74646	0.002	0.008	1
Itih1	0.0483515	0.794226	0.027	0.015	1
Pnpo	0.0483672	0.50629	0.03	0.018	1
Gng2	0.0483865	-0.223873	0.316	0.346	1
Scnn1a	0.0486766	1.23656	0.016	0.008	1
Steap4	0.0487123	1.1071	0.016	0.008	1
Mvb12b	0.0487888	-0.295418	0.139	0.167	1
St8sia4	0.0489257	0.606307	0.055	0.039	1
Mia2	0.0490197	0.121612	0.45	0.401	1
Plekhf2	0.0490878	0.260736	0.111	0.087	1
Sult1d1	0.0493217	0.864186	0.016	0.008	1
Ccdc191	0.0494498	0.365333	0.112	0.088	1
Rpl38	0.0494684	0.41498	0.117	0.093	1
Nktr	0.0495476	0.0789923	0.505	0.466	1
Adck1	0.0495699	-0.46332	0.054	0.073	1
Dusp12	0.049575	-0.495448	0.033	0.049	1
Pcm1	0.0496134	0.190993	0.384	0.354	1
Dmgdh	0.0496524	1.33273	0.018	0.009	1
Aff4	0.0497008	-0.23457	0.295	0.327	1
Mtpap	0.0497142	-0.476288	0.096	0.12	1
Nol8	0.049779	-0.609562	0.048	0.066	1
Cfi	0.0498605	0.871512	0.025	0.014	1
Xrcc4	0.0498993	-0.281324	0.293	0.324	1
Ppa1	0.0499236	0.786761	0.024	0.013	1
Ppp1r12c	0.0499467	-0.220831	0.2	0.232	1
Serpind1	0.0500698	0.620883	0.028	0.016	1
Tjap1	0.0503228	-0.603921	0.037	0.054	1
Gys2	0.050415	0.924332	0.017	0.008	1
Eif3b	0.0504238	-0.359749	0.067	0.089	1
Thap4	0.0504564	-0.77282	0.02	0.033	1
Ptcd3	0.0504604	-0.436963	0.092	0.115	1
Dnaja3	0.0506186	0.2901	0.108	0.085	1
Gm13775	0.0506436	1.05705	0.023	0.013	1
Il13ra1	0.0506787	0.211881	0.154	0.125	1
Erap1	0.0508943	-0.411427	0.13	0.156	1
Arvcf	0.050904	1.11107	0.019	0.01	1
BC052040	0.0509203	-0.315372	0.118	0.144	1
Alas2	0.0513084	0.646936	0.017	0.008	1
Ddx46	0.0513417	-0.24448	0.187	0.221	1
Pgpep1	0.0514077	0.777116	0.022	0.012	1
Unc13b	0.0515454	-0.67863	0.016	0.028	1
Atxn7l3b	0.0519012	0.447634	0.1	0.079	1
Tecpr1	0.0520364	0.524541	0.039	0.025	1
Nedd8	0.0520425	0.52557	0.066	0.048	1
Psmd1	0.0520705	0.245046	0.221	0.19	1
Rab10	0.0521151	-0.191357	0.461	0.492	1
Pigl	0.0521306	0.402195	0.026	0.015	1
Hsd17b2	0.0521635	0.833607	0.018	0.009	1
Dgkq	0.0521707	-0.796202	0.035	0.051	1
Cbl	0.0521982	0.131221	0.556	0.515	1
Trp53bp1	0.052349	-0.330396	0.085	0.108	1
Cyp51	0.052361	0.747247	0.024	0.013	1
Sf3b1	0.0524969	0.131542	0.535	0.496	1
Glud1	0.0525202	0.145575	0.351	0.313	1
Set	0.0525262	0.397355	0.068	0.049	1
Zup1	0.0525584	0.15621	0.398	0.356	1
Qrich1	0.0527308	-0.238945	0.282	0.316	1
Crebzf	0.0528991	0.298621	0.181	0.153	1
Sil1	0.0529168	0.242321	0.246	0.214	1
Hmg20b	0.0529436	-0.461889	0.066	0.087	1
Cdk10	0.0530479	-0.229802	0.062	0.084	1
Hadhb	0.053082	0.476112	0.095	0.073	1
Vps13c	0.053191	-0.163467	0.336	0.372	1
Axl	0.0533417	-0.154661	0.516	0.537	1
Foxn3	0.0533519	0.0928654	0.889	0.883	1
Dync1li1	0.053355	-0.401605	0.087	0.111	1
Shtn1	0.0535799	-0.195056	0.436	0.468	1
Daglb	0.0536027	0.391565	0.111	0.088	1
Max	0.0536546	-0.214952	0.187	0.22	1
Lmo4	0.0537083	-0.561236	0.033	0.049	1
Arfgef2	0.0538478	-0.281216	0.202	0.232	1
Nsfl1c	0.0539504	-0.552026	0.032	0.047	1
Tmem135	0.0539528	0.153115	0.415	0.383	1
Fry	0.0540116	0.193712	0.188	0.157	1
Atp6v1h	0.0540733	-0.225844	0.242	0.275	1
Cebpg	0.0542394	0.212635	0.262	0.23	1
Myo1f	0.0542765	0.126862	0.466	0.427	1
Gabpa	0.0543353	-0.516131	0.068	0.089	1
Atp5h	0.0543663	0.624486	0.074	0.055	1
Abi3	0.054379	-0.270548	0.224	0.254	1
Manea	0.0544301	0.387273	0.054	0.038	1
Rb1	0.0545109	0.163332	0.33	0.289	1
Gucd1	0.0545872	0.422531	0.088	0.068	1
Ttc28	0.0547591	-0.239241	0.195	0.225	1
B3gat3	0.0547858	0.452677	0.071	0.052	1
Gpr39	0.0548162	-4.89853	0	0.004	1
Col5a1	0.0548162	-4.33272	0	0.004	1
Ttll7	0.0548162	-4.77583	0	0.004	1
Gm30117	0.0548162	-4.60892	0	0.004	1
1010001N08Rik	0.0548162	-4.61685	0	0.004	1
Etf1	0.0548437	0.252744	0.199	0.168	1
Prpsap1	0.0550348	-0.520429	0.054	0.073	1
Atp13a3	0.0550473	-0.171002	0.442	0.47	1
Cln3	0.0550529	-0.180978	0.232	0.265	1
Rrn3	0.0550585	0.745224	0.044	0.03	1
Nostrin	0.0551038	-1.31207	0.003	0.009	1
Adh5	0.0551557	0.29341	0.038	0.025	1
Gnas	0.0553501	0.267776	0.253	0.224	1
Tmtc3	0.0553596	0.164178	0.111	0.087	1
Usp49	0.0554595	-0.449264	0.028	0.042	1
Hat1	0.0555718	-0.317252	0.138	0.166	1
Purg	0.055789	-0.402589	0.106	0.131	1
Shoc2	0.0558285	0.145624	0.271	0.235	1
Ppm1k	0.0559458	0.405101	0.075	0.056	1
Pag1	0.0559458	-0.193379	0.423	0.455	1
Chd2	0.0559896	0.130081	0.489	0.452	1
Coro1c	0.056039	-0.486714	0.088	0.111	1
Abcc5	0.0561613	0.213277	0.369	0.342	1
Tshz2	0.0561805	-0.582485	0.033	0.049	1
Cox16	0.0562296	-0.190043	0.42	0.455	1
Selenoi	0.0562765	-0.413535	0.053	0.072	1
Sec24b	0.056361	-0.199962	0.232	0.268	1
Zc3h6	0.0563891	0.293641	0.062	0.044	1
Mrpl24	0.0565234	-0.330331	0.072	0.094	1
Kit	0.0566522	1.13025	0.01	0.004	1
Nqo2	0.0566725	0.552194	0.051	0.035	1
Lrp12	0.056727	0.159757	0.118	0.092	1
Adam19	0.0567369	-3.69101	0.001	0.006	1
Eri1	0.056806	0.187265	0.097	0.074	1
Myo1c	0.0568211	-0.480373	0.057	0.077	1
Adam12	0.0569507	-2.47367	0.001	0.006	1
Banp	0.0569662	-0.261657	0.173	0.203	1
Arhgap12	0.056987	0.114788	0.561	0.527	1
Adamts2	0.0570222	-2.47502	0.001	0.006	1
Ppp1r16b	0.0570937	-2.18587	0.001	0.006	1
Gm50136	0.0570937	-2.36239	0.001	0.006	1
Mcm3ap	0.0571404	0.510411	0.068	0.05	1
Tatdn1	0.0571605	0.542729	0.069	0.051	1
Vav2	0.0571682	-0.183699	0.361	0.392	1
Cxxc5	0.0572058	1.17314	0.01	0.004	1
Papola	0.0572425	-0.144965	0.483	0.518	1
Cdc42bpa	0.0572827	-1.24029	0.009	0.018	1
U2af1	0.057287	-0.209063	0.061	0.082	1
Rdh16f2	0.057317	0.985583	0.01	0.004	1
Surf4	0.0573398	0.497234	0.074	0.055	1
Lyst	0.0575835	0.25673	0.192	0.163	1
Mill2	0.0576013	0.27738	0.162	0.136	1
Psmd12	0.0576037	0.558157	0.069	0.051	1
Atp11b	0.0576038	0.22263	0.183	0.153	1
Atp5b	0.0577348	0.400637	0.101	0.08	1
Mindy2	0.0577775	0.27867	0.271	0.239	1
Oma1	0.0580379	0.272933	0.254	0.223	1
Kdm5a	0.0584504	0.137737	0.262	0.227	1
Bank1	0.0584598	-0.100186	0.85	0.879	1
Paqr9	0.0585134	-0.188287	0.339	0.371	1
Gm27003	0.0585999	-0.63478	0.034	0.05	1
Adam17	0.0586463	-0.201609	0.304	0.341	1
Ghitm	0.0587014	0.440727	0.077	0.058	1
Trappc3	0.0587078	-0.40372	0.043	0.061	1
Nxn	0.0588773	-1.37747	0.004	0.011	1
Uspl1	0.0589112	0.423449	0.117	0.094	1
Ppp3cc	0.0590596	0.640168	0.049	0.034	1
Mad1l1	0.0590676	-0.354666	0.11	0.135	1
Igfbp4	0.0590721	0.476972	0.067	0.049	1
Srp9	0.0590942	0.534553	0.043	0.029	1
Cox7a2l	0.0591811	0.591532	0.073	0.054	1
Adgb	0.0591937	-0.10629	0.717	0.742	1
Sh3glb1	0.0593004	0.197486	0.389	0.36	1
Pcsk5	0.0593537	-0.76531	0.009	0.018	1
Pwwp2a	0.0594759	0.180097	0.208	0.176	1
Vps16	0.0594804	-0.520047	0.046	0.063	1
Rasgef1b	0.0595507	-0.0523627	0.815	0.828	1
Cspp1	0.0595966	0.172157	0.271	0.239	1
Tead1	0.0596407	-0.728116	0.004	0.011	1
Tmem234	0.059751	0.313845	0.158	0.131	1
Ifngr1	0.0599309	0.190203	0.378	0.338	1
Cgnl1	0.0600501	-1.72063	0.006	0.013	1
Kmt2d	0.0600609	-0.21338	0.166	0.196	1
Rassf5	0.0601047	-0.579112	0.043	0.06	1
Kctd9	0.0601141	-0.620108	0.045	0.062	1
Keap1	0.0602343	0.288404	0.071	0.052	1
Sh3bgrl	0.0602403	0.176489	0.398	0.368	1
Mettl6	0.0602561	0.598927	0.065	0.048	1
Fn1	0.0603673	0.419421	0.077	0.058	1
Dguok	0.0603833	0.219572	0.116	0.092	1
Med13l	0.060387	-0.253902	0.263	0.299	1
Synj2	0.0604171	-0.414372	0.025	0.039	1
Entpd5	0.0604824	0.72234	0.032	0.02	1
Emc3	0.0605051	0.518341	0.069	0.051	1
St7	0.0606356	-0.260162	0.224	0.253	1
Sepsecs	0.0607321	0.275824	0.06	0.043	1
Pard3	0.0609321	-0.571016	0.027	0.041	1
E030030I06Rik	0.0610768	0.657219	0.048	0.033	1
Adk	0.0613056	-0.279041	0.268	0.299	1
Psip1	0.0613199	0.269762	0.115	0.092	1
Wdr59	0.0613324	-0.634796	0.032	0.046	1
Mup7	0.06135	0.7151	0.041	0.027	1
Chd8	0.0613524	-0.248444	0.224	0.254	1
1700025G04Rik	0.0613643	-0.948801	0.006	0.013	1
Eno1	0.0613936	0.413143	0.05	0.035	1
Rgs16	0.061401	3.11482	0.006	0.001	1
Cct4	0.0614499	-0.486138	0.09	0.112	1
Car5a	0.0618861	2.19789	0.006	0.001	1
Gm3839	0.0618861	2.14746	0.006	0.001	1
Atpaf2	0.0619074	-0.702174	0.017	0.029	1
[truncated: 5,946 more rows]

## Sheet: KCs_ORA_All
	ID	Description	GeneRatio	BgRatio	pvalue	p.adjust	qvalue	geneID	Count	Reference	Direction	Comparison
HALLMARK_COAGULATION	HALLMARK_COAGULATION	HALLMARK_COAGULATION	16/93	87/2342	1.25274628396463e-07	5.26153439265144e-06	5.01098513585851e-06	Apoa1/Serpina1b/Trf/Apoc1/Apoc3/Fgg/C1qa/Serpina1e/Ctsl/Rgn/F2/C8g/Plg/Cfh/Fga/Serpinc1	16	HALLMARK	up	NP
HALLMARK_COMPLEMENT	HALLMARK_COMPLEMENT	HALLMARK_COMPLEMENT	13/93	113/2342	0.000380655	0.00799375	0.0076131	Serpina1b/Apoc1/C1qa/Serpina1e/Ctsl/Hspa5/Cebpb/F2/C1qc/Plg/Cfh/Cd55/Serpinc1	13	HALLMARK	up	NP
HALLMARK_ANDROGEN_RESPONSE	HALLMARK_ANDROGEN_RESPONSE	HALLMARK_ANDROGEN_RESPONSE	09/93	78/2342	0.00314208	0.0439891	0.0418943	Scd1/Fkbp5/Dbi/Selenop/Maf/B2m/Ccnd3/Azgp1/Hpgd	9	HALLMARK	up	NP
HALLMARK_XENOBIOTIC_METABOLISM	HALLMARK_XENOBIOTIC_METABOLISM	HALLMARK_XENOBIOTIC_METABOLISM	12/93	145/2342	0.0106627	0.111958	0.106627	Fabp1/Apoe/Rbp4/Gsta3/Tdo2/Cat/Cyp2e1/Hsd11b1/Ddt/Akr1c6/Plg/Fetub	12	HALLMARK	up	NP
HALLMARK_BILE_ACID_METABOLISM	HALLMARK_BILE_ACID_METABOLISM	HALLMARK_BILE_ACID_METABOLISM	07/93	87/2342	0.054503	0.443371	0.422258	Ttr/Apoa1/Gc/Cat/Abca9/Scp2/Cyp8b1	7	HALLMARK	up	NP
HALLMARK_KRAS_SIGNALING_UP	HALLMARK_KRAS_SIGNALING_UP	HALLMARK_KRAS_SIGNALING_UP	07/93	90/2342	0.0633387	0.443371	0.422258	Rbp4/Csf2ra/Serpina3k/Hsd11b1/Mafb/G0s2/Cfh	7	HALLMARK	up	NP
HALLMARK_TNFA_SIGNALING_VIA_NFKB	HALLMARK_TNFA_SIGNALING_VIA_NFKB	HALLMARK_TNFA_SIGNALING_VIA_NFKB	07/93	99/2342	0.0948571	0.569143	0.542041	Eif1/Dusp1/Cebpb/Zfp36/G0s2/Klf2/Btg2	7	HALLMARK	up	NP
HALLMARK_APOPTOSIS	HALLMARK_APOPTOSIS	HALLMARK_APOPTOSIS	06/93	91/2342	0.14986	0.65027	0.619305	Cth/F2/Cd38/Btg2/Txnip/Gpx1	6	HALLMARK	up	NP
HALLMARK_ESTROGEN_RESPONSE_LATE	HALLMARK_ESTROGEN_RESPONSE_LATE	HALLMARK_ESTROGEN_RESPONSE_LATE	06/93	91/2342	0.14986	0.65027	0.619305	Fkbp5/Serpina1b/Serpina1e/Serpina3k/Ass1/Zfp36	6	HALLMARK	up	NP
HALLMARK_INTERFERON_GAMMA_RESPONSE	HALLMARK_INTERFERON_GAMMA_RESPONSE	HALLMARK_INTERFERON_GAMMA_RESPONSE	07/93	116/2342	0.174094	0.65027	0.619305	Vcam1/B2m/H2-D1/H2-Q10/Cd38/Cfh/Txnip	7	HALLMARK	up	NP
HALLMARK_KRAS_SIGNALING_DN	HALLMARK_KRAS_SIGNALING_DN	HALLMARK_KRAS_SIGNALING_DN	03/93	40/2342	0.210404	0.65027	0.619305	Selenop/Gamt/Btg2	3	HALLMARK	up	NP
HALLMARK_INTERFERON_ALPHA_RESPONSE	HALLMARK_INTERFERON_ALPHA_RESPONSE	HALLMARK_INTERFERON_ALPHA_RESPONSE	04/93	60/2342	0.213162	0.65027	0.619305	B2m/H2-Q10/Txnip/Tent5a	4	HALLMARK	up	NP
HALLMARK_P53_PATHWAY	HALLMARK_P53_PATHWAY	HALLMARK_P53_PATHWAY	06/93	103/2342	0.222597	0.65027	0.619305	Cd81/Slc3a2/Zfp36l1/Ccnd3/Btg2/Txnip	6	HALLMARK	up	NP
HALLMARK_ALLOGRAFT_REJECTION	HALLMARK_ALLOGRAFT_REJECTION	HALLMARK_ALLOGRAFT_REJECTION	05/93	83/2342	0.231494	0.65027	0.619305	B2m/Rpl9/F2/Ccnd3/H2-Q10	5	HALLMARK	up	NP
HALLMARK_ADIPOGENESIS	HALLMARK_ADIPOGENESIS	HALLMARK_ADIPOGENESIS	08/93	150/2342	0.242023	0.65027	0.619305	Apoe/Cat/Ubc/Scp2/Ddt/Cox8a/Orm1/Chchd10	8	HALLMARK	up	NP
HALLMARK_PEROXISOME	HALLMARK_PEROXISOME	HALLMARK_PEROXISOME	04/93	64/2342	0.247722	0.65027	0.619305	Alb/Ttr/Cat/Scp2	4	HALLMARK	up	NP
HALLMARK_UNFOLDED_PROTEIN_RESPONSE	HALLMARK_UNFOLDED_PROTEIN_RESPONSE	HALLMARK_UNFOLDED_PROTEIN_RESPONSE	04/93	76/2342	0.356736	0.84974	0.809276	Hspa5/Cebpb/Rps14/Herpud1	4	HALLMARK	up	NP
HALLMARK_REACTIVE_OXYGEN_SPECIES_PATHWAY	HALLMARK_REACTIVE_OXYGEN_SPECIES_PATHWAY	HALLMARK_REACTIVE_OXYGEN_SPECIES_PATHWAY	02/93	33/2342	0.379762	0.84974	0.809276	Mgst1/Cat	2	HALLMARK	up	NP
HALLMARK_UV_RESPONSE_UP	HALLMARK_UV_RESPONSE_UP	HALLMARK_UV_RESPONSE_UP	04/93	79/2342	0.384406	0.84974	0.809276	Ctsl/Creg1/Ccnd3/Btg2	4	HALLMARK	up	NP
HALLMARK_PANCREAS_BETA_CELLS	HALLMARK_PANCREAS_BETA_CELLS	HALLMARK_PANCREAS_BETA_CELLS	01/93	14/2342	0.433845	0.908401	0.865144	Mafb	1	HALLMARK	up	NP
HALLMARK_ANGIOGENESIS	HALLMARK_ANGIOGENESIS	HALLMARK_ANGIOGENESIS	01/93	15/2342	0.456462	0.908401	0.865144	Apoh	1	HALLMARK	up	NP
HALLMARK_APICAL_JUNCTION	HALLMARK_APICAL_JUNCTION	HALLMARK_APICAL_JUNCTION	04/93	92/2342	0.501485	0.908401	0.865144	Vcam1/Ctnnd1/Pten/Gamt	4	HALLMARK	up	NP
HALLMARK_IL6_JAK_STAT3_SIGNALING	HALLMARK_IL6_JAK_STAT3_SIGNALING	HALLMARK_IL6_JAK_STAT3_SIGNALING	02/93	43/2342	0.515483	0.908401	0.865144	Csf2ra/Cd38	2	HALLMARK	up	NP
HALLMARK_HEDGEHOG_SIGNALING	HALLMARK_HEDGEHOG_SIGNALING	HALLMARK_HEDGEHOG_SIGNALING	01/93	18/2342	0.519087	0.908401	0.865144	Plg	1	HALLMARK	up	NP
HALLMARK_HYPOXIA	HALLMARK_HYPOXIA	HALLMARK_HYPOXIA	04/93	100/2342	0.568803	0.929985	0.8857	Hspa5/Dusp1/Zfp36/Aldob	4	HALLMARK	up	NP
HALLMARK_MTORC1_SIGNALING	HALLMARK_MTORC1_SIGNALING	HALLMARK_MTORC1_SIGNALING	05/93	127/2342	0.575705	0.929985	0.8857	Scd1/Hspa5/Cth/Btg2/Ppia	5	HALLMARK	up	NP
HALLMARK_GLYCOLYSIS	HALLMARK_GLYCOLYSIS	HALLMARK_GLYCOLYSIS	04/93	107/2342	0.62349	0.969874	0.92369	Hspa5/Cth/Aldob/Ppia	4	HALLMARK	up	NP
HALLMARK_FATTY_ACID_METABOLISM	HALLMARK_FATTY_ACID_METABOLISM	HALLMARK_FATTY_ACID_METABOLISM	04/93	113/2342	0.666824	0.988358	0.941293	Fabp1/Tdo2/G0s2/Hpgd	4	HALLMARK	up	NP
HALLMARK_MYC_TARGETS_V1	HALLMARK_MYC_TARGETS_V1	HALLMARK_MYC_TARGETS_V1	05/93	143/2342	0.682438	0.988358	0.941293	Srsf7/Rps5/Rps10/Ppia/Hsp90ab1	5	HALLMARK	up	NP
HALLMARK_IL2_STAT5_SIGNALING	HALLMARK_IL2_STAT5_SIGNALING	HALLMARK_IL2_STAT5_SIGNALING	03/93	96/2342	0.744956	0.996114	0.94868	Cd81/Ccnd3/Serpinc1	3	HALLMARK	up	NP
HALLMARK_MYOGENESIS	HALLMARK_MYOGENESIS	HALLMARK_MYOGENESIS	02/93	72/2342	0.789608	0.996114	0.94868	Scd1/Mef2a	2	HALLMARK	up	NP
HALLMARK_INFLAMMATORY_RESPONSE	HALLMARK_INFLAMMATORY_RESPONSE	HALLMARK_INFLAMMATORY_RESPONSE	02/93	76/2342	0.814324	0.996114	0.94868	Cd55/Btg2	2	HALLMARK	up	NP
HALLMARK_TGF_BETA_SIGNALING	HALLMARK_TGF_BETA_SIGNALING	HALLMARK_TGF_BETA_SIGNALING	01/93	44/2342	0.834665	0.996114	0.94868	Id3	1	HALLMARK	up	NP
HALLMARK_CHOLESTEROL_HOMEOSTASIS	HALLMARK_CHOLESTEROL_HOMEOSTASIS	HALLMARK_CHOLESTEROL_HOMEOSTASIS	01/93	47/2342	0.853945	0.996114	0.94868	Scd1	1	HALLMARK	up	NP
HALLMARK_HEME_METABOLISM	HALLMARK_HEME_METABOLISM	HALLMARK_HEME_METABOLISM	03/93	117/2342	0.854554	0.996114	0.94868	Cat/Ccnd3/Btg2	3	HALLMARK	up	NP
HALLMARK_OXIDATIVE_PHOSPHORYLATION	HALLMARK_OXIDATIVE_PHOSPHORYLATION	HALLMARK_OXIDATIVE_PHOSPHORYLATION	04/93	155/2342	0.875964	0.996114	0.94868	Ndufa4/Cox8a/Cox7c/Uqcrb	4	HALLMARK	up	NP
HALLMARK_UV_RESPONSE_DN	HALLMARK_UV_RESPONSE_DN	HALLMARK_UV_RESPONSE_DN	02/93	106/2342	0.931028	0.996114	0.94868	Dusp1/Pten	2	HALLMARK	up	NP
HALLMARK_PI3K_AKT_MTOR_SIGNALING	HALLMARK_PI3K_AKT_MTOR_SIGNALING	HALLMARK_PI3K_AKT_MTOR_SIGNALING	01/93	70/2342	0.943859	0.996114	0.94868	Pten	1	HALLMARK	up	NP
HALLMARK_E2F_TARGETS	HALLMARK_E2F_TARGETS	HALLMARK_E2F_TARGETS	01/93	73/2342	0.950478	0.996114	0.94868	Pnn	1	HALLMARK	up	NP
HALLMARK_EPITHELIAL_MESENCHYMAL_TRANSITION	HALLMARK_EPITHELIAL_MESENCHYMAL_TRANSITION	HALLMARK_EPITHELIAL_MESENCHYMAL_TRANSITION	01/93	76/2342	0.956323	0.996114	0.94868	Vcam1	1	HALLMARK	up	NP
HALLMARK_ESTROGEN_RESPONSE_EARLY	HALLMARK_ESTROGEN_RESPONSE_EARLY	HALLMARK_ESTROGEN_RESPONSE_EARLY	01/93	100/2342	0.984109	0.996114	0.94868	Fkbp5	1	HALLMARK	up	NP
HALLMARK_MITOTIC_SPINDLE	HALLMARK_MITOTIC_SPINDLE	HALLMARK_MITOTIC_SPINDLE	01/93	133/2342	0.996114	0.996114	0.94868	Ssh2	1	HALLMARK	up	NP
REACTOME_RESPONSE_TO_ELEVATED_PLATELET_CYTOSOLIC_CA2	REACTOME_RESPONSE_TO_ELEVATED_PLATELET_CYTOSOLIC_CA2	REACTOME_RESPONSE_TO_ELEVATED_PLATELET_CYTOSOLIC_CA2	19/129	87/4668	9.28667520453062e-13	4.43903074776564e-10	2.9130833799475e-10	Alb/Apoa1/Serpina1b/Selenop/Trf/Tmsb4x/Fgb/Fgg/Apoh/Serpina1e/Serpina3k/Hspa5/Ahsg/Manf/Rarres2/Orm1/Plg/Fga/Ppia	19	REACTOME	up	NP
REACTOME_REGULATION_OF_INSULIN_LIKE_GROWTH_FACTOR_IGF_TRANSPORT_AND_UPTAKE_BY_INSULIN_LIKE_GROWTH_FACTOR_BINDING_PROTEINS_IGFBPS	REACTOME_REGULATION_OF_INSULIN_LIKE_GROWTH_FACTOR_IGF_TRANSPORT_AND_UPTAKE_BY_INSULIN_LIKE_GROWTH_FACTOR_BINDING_PROTEINS_IGFBPS	REACTOME_REGULATION_OF_INSULIN_LIKE_GROWTH_FACTOR_IGF_TRANSPORT_AND_UPTAKE_BY_INSULIN_LIKE_GROWTH_FACTOR_BINDING_PROTEINS_IGFBPS	15/129	57/4668	1.52371882279612e-11	3.64168798648272e-09	2.38983267996444e-09	Alb/Apoa2/Apoe/Apoa1/Serpina1b/Trf/Fgg/Serpina1e/Ahsg/F2/Plg/Apoa5/Fga/Serpinc1/Cst3	15	REACTOME	up	NP
REACTOME_AMYLOID_FIBER_FORMATION	REACTOME_AMYLOID_FIBER_FORMATION	REACTOME_AMYLOID_FIBER_FORMATION	10/129	31/4668	4.96630898796646e-09	7.91298565415989e-07	5.19284238040002e-07	Ttr/Apoe/Apoa1/Ubb/B2m/Ubc/Itm2b/Rps27a/Fga/Cst3	10	REACTOME	up	NP
REACTOME_PLATELET_ACTIVATION_SIGNALING_AND_AGGREGATION	REACTOME_PLATELET_ACTIVATION_SIGNALING_AND_AGGREGATION	REACTOME_PLATELET_ACTIVATION_SIGNALING_AND_AGGREGATION	20/129	160/4668	8.76623031729303e-09	1.04756452291652e-06	6.8745700909298e-07	Alb/Apoa1/Serpina1b/Selenop/Trf/Tmsb4x/Fgb/Fgg/Apoh/Serpina1e/Serpina3k/Hspa5/Ahsg/Manf/F2/Rarres2/Orm1/Plg/Fga/Ppia	20	REACTOME	up	NP
REACTOME_SELENOAMINO_ACID_METABOLISM	REACTOME_SELENOAMINO_ACID_METABOLISM	REACTOME_SELENOAMINO_ACID_METABOLISM	16/129	104/4668	1.5446138649623e-08	1.47665085490396e-06	9.69041961597399e-07	Rps18/Rpl9/Cth/Rps14/Rps23/Rps13/Rps7/Rpl23/Rpl35a/Rps5/Sephs2/Mat1a/Rps27a/Rpl11/Rpl30/Rps10	16	REACTOME	up	NP
REACTOME_EUKARYOTIC_TRANSLATION_ELONGATION	REACTOME_EUKARYOTIC_TRANSLATION_ELONGATION	REACTOME_EUKARYOTIC_TRANSLATION_ELONGATION	14/129	84/4668	4.58474021303021e-08	3.6525097030474e-06	2.39693435698773e-06	Rps18/Rpl9/Eef1a1/Rps14/Rps23/Rps13/Rps7/Rpl23/Rpl35a/Rps5/Rps27a/Rpl11/Rpl30/Rps10	14	REACTOME	up	NP
REACTOME_RESPONSE_OF_EIF2AK4_GCN2_TO_AMINO_ACID_DEFICIENCY	REACTOME_RESPONSE_OF_EIF2AK4_GCN2_TO_AMINO_ACID_DEFICIENCY	REACTOME_RESPONSE_OF_EIF2AK4_GCN2_TO_AMINO_ACID_DEFICIENCY	14/129	90/4668	1.13416391724259e-07	7.34945642860568e-06	4.82303020419399e-06	Rps18/Rpl9/Cebpb/Rps14/Rps23/Rps13/Rps7/Rpl23/Rpl35a/Rps5/Rps27a/Rpl11/Rpl30/Rps10	14	REACTOME	up	NP
REACTOME_METABOLISM_OF_AMINO_ACIDS_AND_DERIVATIVES	REACTOME_METABOLISM_OF_AMINO_ACIDS_AND_DERIVATIVES	REACTOME_METABOLISM_OF_AMINO_ACIDS_AND_DERIVATIVES	24/129	262/4668	1.23003454872062e-07	7.34945642860568e-06	4.82303020419399e-06	Bhmt/Tdo2/Rps18/Rpl9/Rida/Slc3a2/Cth/Rps14/Rps23/Rps13/Ass1/Rps7/Rpl23/Rpl35a/Rps5/Sephs2/Oaz1/Mat1a/Rps27a/Otc/Gamt/Rpl11/Rpl30/Rps10	24	REACTOME	up	NP
REACTOME_NONSENSE_MEDIATED_DECAY_NMD	REACTOME_NONSENSE_MEDIATED_DECAY_NMD	REACTOME_NONSENSE_MEDIATED_DECAY_NMD	13/129	98/4668	2.17930075114441e-06	0.000114399	7.50738605275354e-05	Rps18/Rpl9/Rps14/Rps23/Rps13/Rps7/Rpl23/Rpl35a/Rps5/Rps27a/Rpl11/Rpl30/Rps10	13	REACTOME	up	NP
REACTOME_PLASMA_LIPOPROTEIN_ASSEMBLY	REACTOME_PLASMA_LIPOPROTEIN_ASSEMBLY	REACTOME_PLASMA_LIPOPROTEIN_ASSEMBLY	6/129	16/4668	2.53067438870969e-06	0.000114399	7.50738605275354e-05	Apoa2/Apoe/Apoa1/Apoc1/Apoc3/Apoc4	6	REACTOME	up	NP
REACTOME_EUKARYOTIC_TRANSLATION_INITIATION	REACTOME_EUKARYOTIC_TRANSLATION_INITIATION	REACTOME_EUKARYOTIC_TRANSLATION_INITIATION	13/129	100/4668	2.75102680558586e-06	0.000114399	7.50738605275354e-05	Rps18/Rpl9/Rps14/Rps23/Rps13/Rps7/Rpl23/Rpl35a/Rps5/Rps27a/Rpl11/Rpl30/Rps10	13	REACTOME	up	NP
REACTOME_SRP_DEPENDENT_COTRANSLATIONAL_PROTEIN_TARGETING_TO_MEMBRANE	REACTOME_SRP_DEPENDENT_COTRANSLATIONAL_PROTEIN_TARGETING_TO_MEMBRANE	REACTOME_SRP_DEPENDENT_COTRANSLATIONAL_PROTEIN_TARGETING_TO_MEMBRANE	13/129	101/4668	3.08399050907759e-06	0.000114399	7.50738605275354e-05	Rps18/Rpl9/Rps14/Rps23/Rps13/Rps7/Rpl23/Rpl35a/Rps5/Rps27a/Rpl11/Rpl30/Rps10	13	REACTOME	up	NP
REACTOME_REGULATION_OF_EXPRESSION_OF_SLITS_AND_ROBOS	REACTOME_REGULATION_OF_EXPRESSION_OF_SLITS_AND_ROBOS	REACTOME_REGULATION_OF_EXPRESSION_OF_SLITS_AND_ROBOS	15/129	134/4668	3.11128247488276e-06	0.000114399	7.50738605275354e-05	Ubb/Rps18/Rpl9/Ubc/Rps14/Rps23/Rps13/Rps7/Rpl23/Rpl35a/Rps5/Rps27a/Rpl11/Rpl30/Rps10	15	REACTOME	up	NP
REACTOME_CELLULAR_RESPONSE_TO_STARVATION	REACTOME_CELLULAR_RESPONSE_TO_STARVATION	REACTOME_CELLULAR_RESPONSE_TO_STARVATION	14/129	121/4668	4.58404818082321e-06	0.000156513	0.00010271	Rps18/Rpl9/Cebpb/Rps14/Rps23/Rps13/Rps7/Rpl23/Rpl35a/Rps5/Rps27a/Rpl11/Rpl30/Rps10	14	REACTOME	up	NP
REACTOME_SIGNALING_BY_ROBO_RECEPTORS	REACTOME_SIGNALING_BY_ROBO_RECEPTORS	REACTOME_SIGNALING_BY_ROBO_RECEPTORS	16/129	162/4668	7.48505929289427e-06	0.000238524	0.00015653	Ubb/Rps18/Rpl9/Ubc/Arhgap39/Rps14/Rps23/Rps13/Rps7/Rpl23/Rpl35a/Rps5/Rps27a/Rpl11/Rpl30/Rps10	16	REACTOME	up	NP
REACTOME_BINDING_AND_UPTAKE_OF_LIGANDS_BY_SCAVENGER_RECEPTORS	REACTOME_BINDING_AND_UPTAKE_OF_LIGANDS_BY_SCAVENGER_RECEPTORS	REACTOME_BINDING_AND_UPTAKE_OF_LIGANDS_BY_SCAVENGER_RECEPTORS	7/129	30/4668	1.25330033218539e-05	0.000332821	0.000218411	Alb/Apoe/Apoa1/Fth1/Cd163/Colec12/Ambp	7	REACTOME	up	NP
REACTOME_METABOLISM_OF_FAT_SOLUBLE_VITAMINS	REACTOME_METABOLISM_OF_FAT_SOLUBLE_VITAMINS	REACTOME_METABOLISM_OF_FAT_SOLUBLE_VITAMINS	7/129	30/4668	1.25330033218539e-05	0.000332821	0.000218411	Ttr/Apoa2/Apoe/Apoa1/Rbp4/Apoc3/Akr1c6	7	REACTOME	up	NP
REACTOME_PLASMA_LIPOPROTEIN_REMODELING	REACTOME_PLASMA_LIPOPROTEIN_REMODELING	REACTOME_PLASMA_LIPOPROTEIN_REMODELING	7/129	30/4668	1.25330033218539e-05	0.000332821	0.000218411	Alb/Apoa2/Apoe/Apoa1/Apoc3/Plg/Apoa5	7	REACTOME	up	NP
REACTOME_COMMON_PATHWAY_OF_FIBRIN_CLOT_FORMATION	REACTOME_COMMON_PATHWAY_OF_FIBRIN_CLOT_FORMATION	REACTOME_COMMON_PATHWAY_OF_FIBRIN_CLOT_FORMATION	5/129	13/4668	1.60697934741047e-05	0.000404282	0.000265307	Fgb/Fgg/F2/Fga/Serpinc1	5	REACTOME	up	NP
REACTOME_INFLUENZA_INFECTION	REACTOME_INFLUENZA_INFECTION	REACTOME_INFLUENZA_INFECTION	13/129	119/4668	1.93190780354679e-05	0.000461726	0.000303004	Rps18/Rpl9/Rps14/Rps23/Rps13/Rps7/Rpl23/Rpl35a/Rps5/Rps27a/Rpl11/Rpl30/Rps10	13	REACTOME	up	NP
REACTOME_ANTIGEN_PROCESSING_CROSS_PRESENTATION	REACTOME_ANTIGEN_PROCESSING_CROSS_PRESENTATION	REACTOME_ANTIGEN_PROCESSING_CROSS_PRESENTATION	10/129	72/4668	2.29290578221953e-05	0.000521909	0.000342499	Fgb/Fgg/Ubb/Ctsl/B2m/Ubc/H2-D1/H2-Q10/Rps27a/Fga	10	REACTOME	up	NP
REACTOME_CHAPERONE_MEDIATED_AUTOPHAGY	REACTOME_CHAPERONE_MEDIATED_AUTOPHAGY	REACTOME_CHAPERONE_MEDIATED_AUTOPHAGY	5/129	14/4668	2.44456190273975e-05	0.000531137	0.000348555	Ubb/Eef1a1/Ubc/Rps27a/Hsp90ab1	5	REACTOME	up	NP
REACTOME_PLASMA_LIPOPROTEIN_ASSEMBLY_REMODELING_AND_CLEARANCE	REACTOME_PLASMA_LIPOPROTEIN_ASSEMBLY_REMODELING_AND_CLEARANCE	REACTOME_PLASMA_LIPOPROTEIN_ASSEMBLY_REMODELING_AND_CLEARANCE	9/129	59/4668	2.77466587171415e-05	0.000576648	0.000378421	Alb/Apoa2/Apoe/Apoa1/Apoc1/Apoc3/Apoc4/Plg/Apoa5	9	REACTOME	up	NP
REACTOME_IMMUNOREGULATORY_INTERACTIONS_BETWEEN_A_LYMPHOID_AND_A_NON_LYMPHOID_CELL	REACTOME_IMMUNOREGULATORY_INTERACTIONS_BETWEEN_A_LYMPHOID_AND_A_NON_LYMPHOID_CELL	REACTOME_IMMUNOREGULATORY_INTERACTIONS_BETWEEN_A_LYMPHOID_AND_A_NON_LYMPHOID_CELL	6/129	25/4668	4.55951951304364e-05	0.000908104	0.000595937	Vcam1/Cd81/B2m/Colec12/H2-D1/H2-Q10	6	REACTOME	up	NP
REACTOME_ACTIVATION_OF_THE_MRNA_UPON_BINDING_OF_THE_CAP_BINDING_COMPLEX_AND_EIFS_AND_SUBSEQUENT_BINDING_TO_43S	REACTOME_ACTIVATION_OF_THE_MRNA_UPON_BINDING_OF_THE_CAP_BINDING_COMPLEX_AND_EIFS_AND_SUBSEQUENT_BINDING_TO_43S	REACTOME_ACTIVATION_OF_THE_MRNA_UPON_BINDING_OF_THE_CAP_BINDING_COMPLEX_AND_EIFS_AND_SUBSEQUENT_BINDING_TO_43S	8/129	50/4668	5.53538468521968e-05	0.00105837	0.000694545	Rps18/Rps14/Rps23/Rps13/Rps7/Rps5/Rps27a/Rps10	8	REACTOME	up	NP
REACTOME_COMPLEMENT_CASCADE	REACTOME_COMPLEMENT_CASCADE	REACTOME_COMPLEMENT_CASCADE	7/129	38/4668	6.46152764131084e-05	0.00118793	0.000779569	Cd81/C1qa/F2/C8g/C1qc/Cfh/Cd55	7	REACTOME	up	NP
REACTOME_RRNA_PROCESSING	REACTOME_RRNA_PROCESSING	REACTOME_RRNA_PROCESSING	13/129	135/4668	7.4251320771882e-05	0.00131452	0.000862647	Rps18/Rpl9/Rps14/Rps23/Rps13/Rps7/Rpl23/Rpl35a/Rps5/Rps27a/Rpl11/Rpl30/Rps10	13	REACTOME	up	NP
REACTOME_CELLULAR_RESPONSE_TO_CHEMICAL_STRESS	REACTOME_CELLULAR_RESPONSE_TO_CHEMICAL_STRESS	REACTOME_CELLULAR_RESPONSE_TO_CHEMICAL_STRESS	12/129	117/4668	7.70230505549507e-05	0.00131489	0.00086289	Alb/Fabp1/Ubb/Cat/Ubc/Ndufa4/Cox8a/Cox7c/Rps27a/mt-Co2/Txnip/Gpx1	12	REACTOME	up	NP
REACTOME_CHYLOMICRON_ASSEMBLY	REACTOME_CHYLOMICRON_ASSEMBLY	REACTOME_CHYLOMICRON_ASSEMBLY	4/129	4668-10-01	0.000102768	0.0016939	0.00111161	Apoa2/Apoe/Apoa1/Apoc3	4	REACTOME	up	NP
REACTOME_VISUAL_PHOTOTRANSDUCTION	REACTOME_VISUAL_PHOTOTRANSDUCTION	REACTOME_VISUAL_PHOTOTRANSDUCTION	7/129	44/4668	0.000170908	0.00272313	0.00178703	Ttr/Apoa2/Apoe/Apoa1/Rbp4/Apoc3/Akr1c6	7	REACTOME	up	NP
REACTOME_CYTOPROTECTION_BY_HMOX1	REACTOME_CYTOPROTECTION_BY_HMOX1	REACTOME_CYTOPROTECTION_BY_HMOX1	10/129	95/4668	0.000252032	0.00377012	0.00247411	Alb/Fabp1/Ubb/Ubc/Ndufa4/Cox8a/Cox7c/Rps27a/mt-Co2/Txnip	10	REACTOME	up	NP
REACTOME_NEUTROPHIL_DEGRANULATION	REACTOME_NEUTROPHIL_DEGRANULATION	REACTOME_NEUTROPHIL_DEGRANULATION	18/129	261/4668	0.000252393	0.00377012	0.00247411	Ttr/Mgst1/Serpina1b/Fth1/Serpina1e/Creg1/Serpina3k/B2m/Cat/Eef1a1/Ahsg/H2-D1/Orm1/H2-Q10/Cd55/Ppia/Cst3/Hsp90ab1	18	REACTOME	up	NP
REACTOME_FORMATION_OF_FIBRIN_CLOT_CLOTTING_CASCADE	REACTOME_FORMATION_OF_FIBRIN_CLOT_CLOTTING_CASCADE	REACTOME_FORMATION_OF_FIBRIN_CLOT_CLOTTING_CASCADE	5/129	22/4668	0.000269075	0.00389751	0.00255771	Fgb/Fgg/F2/Fga/Serpinc1	5	REACTOME	up	NP
REACTOME_ASSEMBLY_OF_THE_HIV_VIRION	REACTOME_ASSEMBLY_OF_THE_HIV_VIRION	REACTOME_ASSEMBLY_OF_THE_HIV_VIRION	4/129	13/4668	0.000327986	0.00461109	0.003026	Ubb/Ubc/Rps27a/Ppia	4	REACTOME	up	NP
REACTOME_SCAVENGING_BY_CLASS_A_RECEPTORS	REACTOME_SCAVENGING_BY_CLASS_A_RECEPTORS	REACTOME_SCAVENGING_BY_CLASS_A_RECEPTORS	4/129	15/4668	0.00059978	0.00819129	0.00537548	Apoe/Apoa1/Fth1/Colec12	4	REACTOME	up	NP
REACTOME_DISEASES_OF_CARBOHYDRATE_METABOLISM	REACTOME_DISEASES_OF_CARBOHYDRATE_METABOLISM	REACTOME_DISEASES_OF_CARBOHYDRATE_METABOLISM	4/129	16/4668	0.000782704	0.0101117	0.00663573	Ubb/Ubc/Aldob/Rps27a	4	REACTOME	up	NP
REACTOME_LISTERIA_MONOCYTOGENES_ENTRY_INTO_HOST_CELLS	REACTOME_LISTERIA_MONOCYTOGENES_ENTRY_INTO_HOST_CELLS	REACTOME_LISTERIA_MONOCYTOGENES_ENTRY_INTO_HOST_CELLS	4/129	16/4668	0.000782704	0.0101117	0.00663573	Ubb/Ctnnd1/Ubc/Rps27a	4	REACTOME	up	NP
REACTOME_TRANSLATION	REACTOME_TRANSLATION	REACTOME_TRANSLATION	14/129	195/4668	0.000866249	0.0108965	0.00715076	Rps18/Rpl9/Eef1a1/Rps14/Rps23/Rps13/Rps7/Rpl23/Rpl35a/Rps5/Rps27a/Rpl11/Rpl30/Rps10	14	REACTOME	up	NP
REACTOME_INFECTION_WITH_MYCOBACTERIUM_TUBERCULOSIS	REACTOME_INFECTION_WITH_MYCOBACTERIUM_TUBERCULOSIS	REACTOME_INFECTION_WITH_MYCOBACTERIUM_TUBERCULOSIS	4/129	18/4668	0.00126068	0.0154514	0.0101399	Ubb/B2m/Ubc/Rps27a	4	REACTOME	up	NP
REACTOME_BUDDING_AND_MATURATION_OF_HIV_VIRION	REACTOME_BUDDING_AND_MATURATION_OF_HIV_VIRION	REACTOME_BUDDING_AND_MATURATION_OF_HIV_VIRION	4/129	19/4668	0.00156299	0.0186099	0.0122126	Ubb/Ubc/Rps27a/Ppia	4	REACTOME	up	NP
REACTOME_TOLL_LIKE_RECEPTOR_TLR1_TLR2_CASCADE	REACTOME_TOLL_LIKE_RECEPTOR_TLR1_TLR2_CASCADE	REACTOME_TOLL_LIKE_RECEPTOR_TLR1_TLR2_CASCADE	7/129	63/4668	0.00159625	0.0186099	0.0122126	Fgb/Fgg/Ubb/Ubc/Mef2a/Rps27a/Fga	7	REACTOME	up	NP
REACTOME_JOSEPHIN_DOMAIN_DUBS	REACTOME_JOSEPHIN_DOMAIN_DUBS	REACTOME_JOSEPHIN_DOMAIN_DUBS	3/129	4668-10-01	0.00214628	0.0233164	0.0153012	Ubb/Ubc/Rps27a	3	REACTOME	up	NP
REACTOME_P75NTR_RECRUITS_SIGNALLING_COMPLEXES	REACTOME_P75NTR_RECRUITS_SIGNALLING_COMPLEXES	REACTOME_P75NTR_RECRUITS_SIGNALLING_COMPLEXES	3/129	4668-10-01	0.00214628	0.0233164	0.0153012	Ubb/Ubc/Rps27a	3	REACTOME	up	NP
REACTOME_TRAF6_MEDIATED_INDUCTION_OF_TAK1_COMPLEX_WITHIN_TLR4_COMPLEX	REACTOME_TRAF6_MEDIATED_INDUCTION_OF_TAK1_COMPLEX_WITHIN_TLR4_COMPLEX	REACTOME_TRAF6_MEDIATED_INDUCTION_OF_TAK1_COMPLEX_WITHIN_TLR4_COMPLEX	3/129	4668-10-01	0.00214628	0.0233164	0.0153012	Ubb/Ubc/Rps27a	3	REACTOME	up	NP
REACTOME_IRON_UPTAKE_AND_TRANSPORT	REACTOME_IRON_UPTAKE_AND_TRANSPORT	REACTOME_IRON_UPTAKE_AND_TRANSPORT	5/129	35/4668	0.00248722	0.0264198	0.0173378	Trf/Fth1/Ubb/Ubc/Rps27a	5	REACTOME	up	NP
REACTOME_ANTIGEN_PRESENTATION_FOLDING_ASSEMBLY_AND_PEPTIDE_LOADING_OF_CLASS_I_MHC	REACTOME_ANTIGEN_PRESENTATION_FOLDING_ASSEMBLY_AND_PEPTIDE_LOADING_OF_CLASS_I_MHC	REACTOME_ANTIGEN_PRESENTATION_FOLDING_ASSEMBLY_AND_PEPTIDE_LOADING_OF_CLASS_I_MHC	4/129	22/4668	0.00276631	0.0265829	0.0174449	B2m/Hspa5/H2-D1/H2-Q10	4	REACTOME	up	NP
REACTOME_ACTIVATION_OF_IRF3_IRF7_MEDIATED_BY_TBK1_IKK_EPSILON	REACTOME_ACTIVATION_OF_IRF3_IRF7_MEDIATED_BY_TBK1_IKK_EPSILON	REACTOME_ACTIVATION_OF_IRF3_IRF7_MEDIATED_BY_TBK1_IKK_EPSILON	3/129	4668-11-01	0.00289186	0.0265829	0.0174449	Ubb/Ubc/Rps27a	3	REACTOME	up	NP
REACTOME_NEGATIVE_REGULATION_OF_FLT3	REACTOME_NEGATIVE_REGULATION_OF_FLT3	REACTOME_NEGATIVE_REGULATION_OF_FLT3	3/129	4668-11-01	0.00289186	0.0265829	0.0174449	Ubb/Ubc/Rps27a	3	REACTOME	up	NP
REACTOME_NF_KB_IS_ACTIVATED_AND_SIGNALS_SURVIVAL	REACTOME_NF_KB_IS_ACTIVATED_AND_SIGNALS_SURVIVAL	REACTOME_NF_KB_IS_ACTIVATED_AND_SIGNALS_SURVIVAL	3/129	4668-11-01	0.00289186	0.0265829	0.0174449	Ubb/Ubc/Rps27a	3	REACTOME	up	NP
REACTOME_REGULATION_OF_FZD_BY_UBIQUITINATION	REACTOME_REGULATION_OF_FZD_BY_UBIQUITINATION	REACTOME_REGULATION_OF_FZD_BY_UBIQUITINATION	3/129	4668-11-01	0.00289186	0.0265829	0.0174449	Ubb/Ubc/Rps27a	3	REACTOME	up	NP
REACTOME_REGULATION_OF_TLR_BY_ENDOGENOUS_LIGAND	REACTOME_REGULATION_OF_TLR_BY_ENDOGENOUS_LIGAND	REACTOME_REGULATION_OF_TLR_BY_ENDOGENOUS_LIGAND	3/129	4668-11-01	0.00289186	0.0265829	0.0174449	Fgb/Fgg/Fga	3	REACTOME	up	NP
REACTOME_SPRY_REGULATION_OF_FGF_SIGNALING	REACTOME_SPRY_REGULATION_OF_FGF_SIGNALING	REACTOME_SPRY_REGULATION_OF_FGF_SIGNALING	3/129	4668-11-01	0.00289186	0.0265829	0.0174449	Ubb/Ubc/Rps27a	3	REACTOME	up	NP
REACTOME_NUCLEOTIDE_BINDING_DOMAIN_LEUCINE_RICH_REPEAT_CONTAINING_RECEPTOR_NLR_SIGNALING_PATHWAYS	REACTOME_NUCLEOTIDE_BINDING_DOMAIN_LEUCINE_RICH_REPEAT_CONTAINING_RECEPTOR_NLR_SIGNALING_PATHWAYS	REACTOME_NUCLEOTIDE_BINDING_DOMAIN_LEUCINE_RICH_REPEAT_CONTAINING_RECEPTOR_NLR_SIGNALING_PATHWAYS	5/129	37/4668	0.0031956	0.0288207	0.0189134	Ubb/Ubc/Rps27a/Txnip/Hsp90ab1	5	REACTOME	up	NP
REACTOME_METABOLISM_OF_VITAMINS_AND_COFACTORS	REACTOME_METABOLISM_OF_VITAMINS_AND_COFACTORS	REACTOME_METABOLISM_OF_VITAMINS_AND_COFACTORS	9/129	111/4668	0.00332341	0.0294184	0.0193056	Ttr/Apoa2/Apoe/Apoa1/Rbp4/Apoc3/Cyp8b1/Akr1c6/Cd38	9	REACTOME	up	NP
REACTOME_SENSORY_PERCEPTION	REACTOME_SENSORY_PERCEPTION	REACTOME_SENSORY_PERCEPTION	7/129	72/4668	0.00346068	0.0296084	0.0194303	Ttr/Apoa2/Apoe/Apoa1/Rbp4/Apoc3/Akr1c6	7	REACTOME	up	NP
REACTOME_GRB2_SOS_PROVIDES_LINKAGE_TO_MAPK_SIGNALING_FOR_INTEGRINS	REACTOME_GRB2_SOS_PROVIDES_LINKAGE_TO_MAPK_SIGNALING_FOR_INTEGRINS	REACTOME_GRB2_SOS_PROVIDES_LINKAGE_TO_MAPK_SIGNALING_FOR_INTEGRINS	3/129	4668-12-01	0.00377848	0.0296084	0.0194303	Fgb/Fgg/Fga	3	REACTOME	up	NP
REACTOME_INLB_MEDIATED_ENTRY_OF_LISTERIA_MONOCYTOGENES_INTO_HOST_CELL	REACTOME_INLB_MEDIATED_ENTRY_OF_LISTERIA_MONOCYTOGENES_INTO_HOST_CELL	REACTOME_INLB_MEDIATED_ENTRY_OF_LISTERIA_MONOCYTOGENES_INTO_HOST_CELL	3/129	4668-12-01	0.00377848	0.0296084	0.0194303	Ubb/Ubc/Rps27a	3	REACTOME	up	NP
REACTOME_IRAK1_RECRUITS_IKK_COMPLEX	REACTOME_IRAK1_RECRUITS_IKK_COMPLEX	REACTOME_IRAK1_RECRUITS_IKK_COMPLEX	3/129	4668-12-01	0.00377848	0.0296084	0.0194303	Ubb/Ubc/Rps27a	3	REACTOME	up	NP
REACTOME_NOTCH2_ACTIVATION_AND_TRANSMISSION_OF_SIGNAL_TO_THE_NUCLEUS	REACTOME_NOTCH2_ACTIVATION_AND_TRANSMISSION_OF_SIGNAL_TO_THE_NUCLEUS	REACTOME_NOTCH2_ACTIVATION_AND_TRANSMISSION_OF_SIGNAL_TO_THE_NUCLEUS	3/129	4668-12-01	0.00377848	0.0296084	0.0194303	Ubb/Ubc/Rps27a	3	REACTOME	up	NP
REACTOME_P130CAS_LINKAGE_TO_MAPK_SIGNALING_FOR_INTEGRINS	REACTOME_P130CAS_LINKAGE_TO_MAPK_SIGNALING_FOR_INTEGRINS	REACTOME_P130CAS_LINKAGE_TO_MAPK_SIGNALING_FOR_INTEGRINS	3/129	4668-12-01	0.00377848	0.0296084	0.0194303	Fgb/Fgg/Fga	3	REACTOME	up	NP
REACTOME_TERMINATION_OF_TRANSLESION_DNA_SYNTHESIS	REACTOME_TERMINATION_OF_TRANSLESION_DNA_SYNTHESIS	REACTOME_TERMINATION_OF_TRANSLESION_DNA_SYNTHESIS	3/129	4668-12-01	0.00377848	0.0296084	0.0194303	Ubb/Ubc/Rps27a	3	REACTOME	up	NP
REACTOME_PLATELET_AGGREGATION_PLUG_FORMATION	REACTOME_PLATELET_AGGREGATION_PLUG_FORMATION	REACTOME_PLATELET_AGGREGATION_PLUG_FORMATION	4/129	24/4668	0.00385039	0.0296853	0.0194808	Fgb/Fgg/F2/Fga	4	REACTOME	up	NP
REACTOME_TOLL_LIKE_RECEPTOR_CASCADES	REACTOME_TOLL_LIKE_RECEPTOR_CASCADES	REACTOME_TOLL_LIKE_RECEPTOR_CASCADES	8/129	95/4668	0.00442771	0.0335944	0.0220461	Fgb/Fgg/Ubb/Ctsl/Ubc/Mef2a/Rps27a/Fga	8	REACTOME	up	NP
REACTOME_RESPIRATORY_ELECTRON_TRANSPORT_ATP_SYNTHESIS_BY_CHEMIOSMOTIC_COUPLING_AND_HEAT_PRODUCTION_BY_UNCOUPLING_PROTEINS	REACTOME_RESPIRATORY_ELECTRON_TRANSPORT_ATP_SYNTHESIS_BY_CHEMIOSMOTIC_COUPLING_AND_HEAT_PRODUCTION_BY_UNCOUPLING_PROTEINS	REACTOME_RESPIRATORY_ELECTRON_TRANSPORT_ATP_SYNTHESIS_BY_CHEMIOSMOTIC_COUPLING_AND_HEAT_PRODUCTION_BY_UNCOUPLING_PROTEINS	8/129	96/4668	0.00472039	0.034342	0.0225367	mt-Nd4/Ndufa4/Cox8a/Cox7c/mt-Atp6/Uqcrb/mt-Nd1/mt-Co2	8	REACTOME	up	NP
REACTOME_FANCONI_ANEMIA_PATHWAY	REACTOME_FANCONI_ANEMIA_PATHWAY	REACTOME_FANCONI_ANEMIA_PATHWAY	3/129	13/4668	0.00481363	0.034342	0.0225367	Ubb/Ubc/Rps27a	3	REACTOME	up	NP
REACTOME_NRIF_SIGNALS_CELL_DEATH_FROM_THE_NUCLEUS	REACTOME_NRIF_SIGNALS_CELL_DEATH_FROM_THE_NUCLEUS	REACTOME_NRIF_SIGNALS_CELL_DEATH_FROM_THE_NUCLEUS	3/129	13/4668	0.00481363	0.034342	0.0225367	Ubb/Ubc/Rps27a	3	REACTOME	up	NP
REACTOME_P75NTR_SIGNALS_VIA_NF_KB	REACTOME_P75NTR_SIGNALS_VIA_NF_KB	REACTOME_P75NTR_SIGNALS_VIA_NF_KB	3/129	13/4668	0.00481363	0.034342	0.0225367	Ubb/Ubc/Rps27a	3	REACTOME	up	NP
REACTOME_CYCLIN_D_ASSOCIATED_EVENTS_IN_G1	REACTOME_CYCLIN_D_ASSOCIATED_EVENTS_IN_G1	REACTOME_CYCLIN_D_ASSOCIATED_EVENTS_IN_G1	4/129	26/4668	0.00519107	0.0364902	0.0239464	Ubb/Ubc/Ccnd3/Rps27a	4	REACTOME	up	NP
REACTOME_RESPIRATORY_ELECTRON_TRANSPORT	REACTOME_RESPIRATORY_ELECTRON_TRANSPORT	REACTOME_RESPIRATORY_ELECTRON_TRANSPORT	7/129	79/4668	0.00580647	0.036793	0.0241451	mt-Nd4/Ndufa4/Cox8a/Cox7c/Uqcrb/mt-Nd1/mt-Co2	7	REACTOME	up	NP
REACTOME_HSF1_ACTIVATION	REACTOME_HSF1_ACTIVATION	REACTOME_HSF1_ACTIVATION	3/129	14/4668	0.00600388	0.036793	0.0241451	Ubb/Eef1a1/Hsp90ab1	3	REACTOME	up	NP
REACTOME_MAP3K8_TPL2_DEPENDENT_MAPK1_3_ACTIVATION	REACTOME_MAP3K8_TPL2_DEPENDENT_MAPK1_3_ACTIVATION	REACTOME_MAP3K8_TPL2_DEPENDENT_MAPK1_3_ACTIVATION	3/129	14/4668	0.00600388	0.036793	0.0241451	Ubb/Ubc/Rps27a	3	REACTOME	up	NP
REACTOME_METALLOPROTEASE_DUBS	REACTOME_METALLOPROTEASE_DUBS	REACTOME_METALLOPROTEASE_DUBS	3/129	14/4668	0.00600388	0.036793	0.0241451	Ubb/Ubc/Rps27a	3	REACTOME	up	NP
REACTOME_NEGATIVE_REGULATION_OF_FGFR1_SIGNALING	REACTOME_NEGATIVE_REGULATION_OF_FGFR1_SIGNALING	REACTOME_NEGATIVE_REGULATION_OF_FGFR1_SIGNALING	3/129	14/4668	0.00600388	0.036793	0.0241451	Ubb/Ubc/Rps27a	3	REACTOME	up	NP
REACTOME_NEGATIVE_REGULATION_OF_FGFR2_SIGNALING	REACTOME_NEGATIVE_REGULATION_OF_FGFR2_SIGNALING	REACTOME_NEGATIVE_REGULATION_OF_FGFR2_SIGNALING	3/129	14/4668	0.00600388	0.036793	0.0241451	Ubb/Ubc/Rps27a	3	REACTOME	up	NP
REACTOME_NEGATIVE_REGULATION_OF_FGFR3_SIGNALING	REACTOME_NEGATIVE_REGULATION_OF_FGFR3_SIGNALING	REACTOME_NEGATIVE_REGULATION_OF_FGFR3_SIGNALING	3/129	14/4668	0.00600388	0.036793	0.0241451	Ubb/Ubc/Rps27a	3	REACTOME	up	NP
REACTOME_NOTCH3_ACTIVATION_AND_TRANSMISSION_OF_SIGNAL_TO_THE_NUCLEUS	REACTOME_NOTCH3_ACTIVATION_AND_TRANSMISSION_OF_SIGNAL_TO_THE_NUCLEUS	REACTOME_NOTCH3_ACTIVATION_AND_TRANSMISSION_OF_SIGNAL_TO_THE_NUCLEUS	3/129	14/4668	0.00600388	0.036793	0.0241451	Ubb/Ubc/Rps27a	3	REACTOME	up	NP
REACTOME_REGULATION_OF_TP53_ACTIVITY_THROUGH_METHYLATION	REACTOME_REGULATION_OF_TP53_ACTIVITY_THROUGH_METHYLATION	REACTOME_REGULATION_OF_TP53_ACTIVITY_THROUGH_METHYLATION	3/129	14/4668	0.00600388	0.036793	0.0241451	Ubb/Ubc/Rps27a	3	REACTOME	up	NP
REACTOME_TGF_BETA_RECEPTOR_SIGNALING_IN_EMT_EPITHELIAL_TO_MESENCHYMAL_TRANSITION	REACTOME_TGF_BETA_RECEPTOR_SIGNALING_IN_EMT_EPITHELIAL_TO_MESENCHYMAL_TRANSITION	REACTOME_TGF_BETA_RECEPTOR_SIGNALING_IN_EMT_EPITHELIAL_TO_MESENCHYMAL_TRANSITION	3/129	14/4668	0.00600388	0.036793	0.0241451	Ubb/Ubc/Rps27a	3	REACTOME	up	NP
REACTOME_OVARIAN_TUMOR_DOMAIN_PROTEASES	REACTOME_OVARIAN_TUMOR_DOMAIN_PROTEASES	REACTOME_OVARIAN_TUMOR_DOMAIN_PROTEASES	4/129	28/4668	0.00681322	0.040709	0.026715	Ubb/Ubc/Pten/Rps27a	4	REACTOME	up	NP
REACTOME_PLASMA_LIPOPROTEIN_CLEARANCE	REACTOME_PLASMA_LIPOPROTEIN_CLEARANCE	REACTOME_PLASMA_LIPOPROTEIN_CLEARANCE	4/129	28/4668	0.00681322	0.040709	0.026715	Apoe/Apoa1/Apoc1/Apoc4	4	REACTOME	up	NP
REACTOME_NEGATIVE_REGULATION_OF_FGFR4_SIGNALING	REACTOME_NEGATIVE_REGULATION_OF_FGFR4_SIGNALING	REACTOME_NEGATIVE_REGULATION_OF_FGFR4_SIGNALING	3/129	15/4668	0.0073549	0.0418529	0.0274657	Ubb/Ubc/Rps27a	3	REACTOME	up	NP
REACTOME_RAS_PROCESSING	REACTOME_RAS_PROCESSING	REACTOME_RAS_PROCESSING	3/129	15/4668	0.0073549	0.0418529	0.0274657	Ubb/Ubc/Rps27a	3	REACTOME	up	NP
REACTOME_RECOGNITION_OF_DNA_DAMAGE_BY_PCNA_CONTAINING_REPLICATION_COMPLEX	REACTOME_RECOGNITION_OF_DNA_DAMAGE_BY_PCNA_CONTAINING_REPLICATION_COMPLEX	REACTOME_RECOGNITION_OF_DNA_DAMAGE_BY_PCNA_CONTAINING_REPLICATION_COMPLEX	3/129	15/4668	0.0073549	0.0418529	0.0274657	Ubb/Ubc/Rps27a	3	REACTOME	up	NP
REACTOME_TICAM1_RIP1_MEDIATED_IKK_COMPLEX_RECRUITMENT	REACTOME_TICAM1_RIP1_MEDIATED_IKK_COMPLEX_RECRUITMENT	REACTOME_TICAM1_RIP1_MEDIATED_IKK_COMPLEX_RECRUITMENT	3/129	15/4668	0.0073549	0.0418529	0.0274657	Ubb/Ubc/Rps27a	3	REACTOME	up	NP
REACTOME_NEGATIVE_REGULATION_OF_MAPK_PATHWAY	REACTOME_NEGATIVE_REGULATION_OF_MAPK_PATHWAY	REACTOME_NEGATIVE_REGULATION_OF_MAPK_PATHWAY	4/129	29/4668	0.00773712	0.0435099	0.0285531	Ubb/Ubc/Dusp1/Rps27a	4	REACTOME	up	NP
REACTOME_CONSTITUTIVE_SIGNALING_BY_LIGAND_RESPONSIVE_EGFR_CANCER_VARIANTS	REACTOME_CONSTITUTIVE_SIGNALING_BY_LIGAND_RESPONSIVE_EGFR_CANCER_VARIANTS	REACTOME_CONSTITUTIVE_SIGNALING_BY_LIGAND_RESPONSIVE_EGFR_CANCER_VARIANTS	3/129	16/4668	0.00887156	0.0471178	0.0309208	Ubb/Ubc/Rps27a	3	REACTOME	up	NP
REACTOME_ER_QUALITY_CONTROL_COMPARTMENT_ERQC	REACTOME_ER_QUALITY_CONTROL_COMPARTMENT_ERQC	REACTOME_ER_QUALITY_CONTROL_COMPARTMENT_ERQC	3/129	16/4668	0.00887156	0.0471178	0.0309208	Ubb/Ubc/Rps27a	3	REACTOME	up	NP
REACTOME_GLYCOGEN_METABOLISM	REACTOME_GLYCOGEN_METABOLISM	REACTOME_GLYCOGEN_METABOLISM	3/129	16/4668	0.00887156	0.0471178	0.0309208	Ubb/Ubc/Rps27a	3	REACTOME	up	NP
REACTOME_RESPONSE_OF_MTB_TO_PHAGOCYTOSIS	REACTOME_RESPONSE_OF_MTB_TO_PHAGOCYTOSIS	REACTOME_RESPONSE_OF_MTB_TO_PHAGOCYTOSIS	3/129	16/4668	0.00887156	0.0471178	0.0309208	Ubb/Ubc/Rps27a	3	REACTOME	up	NP
REACTOME_SULFUR_AMINO_ACID_METABOLISM	REACTOME_SULFUR_AMINO_ACID_METABOLISM	REACTOME_SULFUR_AMINO_ACID_METABOLISM	3/129	16/4668	0.00887156	0.0471178	0.0309208	Bhmt/Cth/Mat1a	3	REACTOME	up	NP
REACTOME_PROTEIN_LOCALIZATION	REACTOME_PROTEIN_LOCALIZATION	REACTOME_PROTEIN_LOCALIZATION	8/129	109/4668	0.0100343	0.0505204	0.0331536	Chchd2/Ubb/Cat/Ubc/Scp2/Rps27a/Otc/Chchd10	8	REACTOME	up	NP
REACTOME_ACTIVATED_NOTCH1_TRANSMITS_SIGNAL_TO_THE_NUCLEUS	REACTOME_ACTIVATED_NOTCH1_TRANSMITS_SIGNAL_TO_THE_NUCLEUS	REACTOME_ACTIVATED_NOTCH1_TRANSMITS_SIGNAL_TO_THE_NUCLEUS	3/129	17/4668	0.0105579	0.0505204	0.0331536	Ubb/Ubc/Rps27a	3	REACTOME	up	NP
REACTOME_APC_C_CDC20_MEDIATED_DEGRADATION_OF_CYCLIN_B	REACTOME_APC_C_CDC20_MEDIATED_DEGRADATION_OF_CYCLIN_B	REACTOME_APC_C_CDC20_MEDIATED_DEGRADATION_OF_CYCLIN_B	3/129	17/4668	0.0105579	0.0505204	0.0331536	Ubb/Ubc/Rps27a	3	REACTOME	up	NP
REACTOME_DISEASES_OF_IMMUNE_SYSTEM	REACTOME_DISEASES_OF_IMMUNE_SYSTEM	REACTOME_DISEASES_OF_IMMUNE_SYSTEM	3/129	17/4668	0.0105579	0.0505204	0.0331536	Fgb/Fgg/Fga	3	REACTOME	up	NP
REACTOME_DOWNREGULATION_OF_ERBB2_SIGNALING	REACTOME_DOWNREGULATION_OF_ERBB2_SIGNALING	REACTOME_DOWNREGULATION_OF_ERBB2_SIGNALING	3/129	17/4668	0.0105579	0.0505204	0.0331536	Ubb/Ubc/Rps27a	3	REACTOME	up	NP
REACTOME_IKK_COMPLEX_RECRUITMENT_MEDIATED_BY_RIP1	REACTOME_IKK_COMPLEX_RECRUITMENT_MEDIATED_BY_RIP1	REACTOME_IKK_COMPLEX_RECRUITMENT_MEDIATED_BY_RIP1	3/129	17/4668	0.0105579	0.0505204	0.0331536	Ubb/Ubc/Rps27a	3	REACTOME	up	NP
REACTOME_PINK1_PRKN_MEDIATED_MITOPHAGY	REACTOME_PINK1_PRKN_MEDIATED_MITOPHAGY	REACTOME_PINK1_PRKN_MEDIATED_MITOPHAGY	3/129	17/4668	0.0105579	0.0505204	0.0331536	Ubb/Ubc/Rps27a	3	REACTOME	up	NP
REACTOME_SIGNALING_BY_EGFR_IN_CANCER	REACTOME_SIGNALING_BY_EGFR_IN_CANCER	REACTOME_SIGNALING_BY_EGFR_IN_CANCER	3/129	17/4668	0.0105579	0.0505204	0.0331536	Ubb/Ubc/Rps27a	3	REACTOME	up	NP
REACTOME_TRANSLESION_SYNTHESIS_BY_Y_FAMILY_DNA_POLYMERASES_BYPASSES_LESIONS_ON_DNA_TEMPLATE	REACTOME_TRANSLESION_SYNTHESIS_BY_Y_FAMILY_DNA_POLYMERASES_BYPASSES_LESIONS_ON_DNA_TEMPLATE	REACTOME_TRANSLESION_SYNTHESIS_BY_Y_FAMILY_DNA_POLYMERASES_BYPASSES_LESIONS_ON_DNA_TEMPLATE	3/129	17/4668	0.0105579	0.0505204	0.0331536	Ubb/Ubc/Rps27a	3	REACTOME	up	NP
REACTOME_PEROXISOMAL_PROTEIN_IMPORT	REACTOME_PEROXISOMAL_PROTEIN_IMPORT	REACTOME_PEROXISOMAL_PROTEIN_IMPORT	5/129	49/4668	0.0107414	0.0505204	0.0331536	Ubb/Cat/Ubc/Scp2/Rps27a	5	REACTOME	up	NP
REACTOME_BILE_ACID_AND_BILE_SALT_METABOLISM	REACTOME_BILE_ACID_AND_BILE_SALT_METABOLISM	REACTOME_BILE_ACID_AND_BILE_SALT_METABOLISM	4/129	32/4668	0.0109919	0.0505204	0.0331536	Alb/Scp2/Cyp8b1/Akr1c6	4	REACTOME	up	NP
REACTOME_INTERLEUKIN_3_INTERLEUKIN_5_AND_GM_CSF_SIGNALING	REACTOME_INTERLEUKIN_3_INTERLEUKIN_5_AND_GM_CSF_SIGNALING	REACTOME_INTERLEUKIN_3_INTERLEUKIN_5_AND_GM_CSF_SIGNALING	4/129	32/4668	0.0109919	0.0505204	0.0331536	Ubb/Csf2ra/Ubc/Rps27a	4	REACTOME	up	NP
REACTOME_SENESCENCE_ASSOCIATED_SECRETORY_PHENOTYPE_SASP	REACTOME_SENESCENCE_ASSOCIATED_SECRETORY_PHENOTYPE_SASP	REACTOME_SENESCENCE_ASSOCIATED_SECRETORY_PHENOTYPE_SASP	4/129	32/4668	0.0109919	0.0505204	0.0331536	Ubb/Ubc/Cebpb/Rps27a	4	REACTOME	up	NP
REACTOME_STIMULI_SENSING_CHANNELS	REACTOME_STIMULI_SENSING_CHANNELS	REACTOME_STIMULI_SENSING_CHANNELS	4/129	32/4668	0.0109919	0.0505204	0.0331536	Ubb/Tsc22d3/Ubc/Rps27a	4	REACTOME	up	NP
REACTOME_SIGNALING_BY_ERBB4	REACTOME_SIGNALING_BY_ERBB4	REACTOME_SIGNALING_BY_ERBB4	4/129	33/4668	0.0122459	0.0539592	0.0354104	Apoe/Ubb/Ubc/Rps27a	4	REACTOME	up	NP
REACTOME_ACTIVATED_TAK1_MEDIATES_P38_MAPK_ACTIVATION	REACTOME_ACTIVATED_TAK1_MEDIATES_P38_MAPK_ACTIVATION	REACTOME_ACTIVATED_TAK1_MEDIATES_P38_MAPK_ACTIVATION	3/129	18/4668	0.0124174	0.0539592	0.0354104	Ubb/Ubc/Rps27a	3	REACTOME	up	NP
REACTOME_APC_CDC20_MEDIATED_DEGRADATION_OF_NEK2A	REACTOME_APC_CDC20_MEDIATED_DEGRADATION_OF_NEK2A	REACTOME_APC_CDC20_MEDIATED_DEGRADATION_OF_NEK2A	3/129	18/4668	0.0124174	0.0539592	0.0354104	Ubb/Ubc/Rps27a	3	REACTOME	up	NP
REACTOME_JNK_C_JUN_KINASES_PHOSPHORYLATION_AND_ACTIVATION_MEDIATED_BY_ACTIVATED_HUMAN_TAK1	REACTOME_JNK_C_JUN_KINASES_PHOSPHORYLATION_AND_ACTIVATION_MEDIATED_BY_ACTIVATED_HUMAN_TAK1	REACTOME_JNK_C_JUN_KINASES_PHOSPHORYLATION_AND_ACTIVATION_MEDIATED_BY_ACTIVATED_HUMAN_TAK1	3/129	18/4668	0.0124174	0.0539592	0.0354104	Ubb/Ubc/Rps27a	3	REACTOME	up	NP
REACTOME_NEGATIVE_REGULATION_OF_MET_ACTIVITY	REACTOME_NEGATIVE_REGULATION_OF_MET_ACTIVITY	REACTOME_NEGATIVE_REGULATION_OF_MET_ACTIVITY	3/129	18/4668	0.0124174	0.0539592	0.0354104	Ubb/Ubc/Rps27a	3	REACTOME	up	NP
REACTOME_REGULATION_OF_SIGNALING_BY_CBL	REACTOME_REGULATION_OF_SIGNALING_BY_CBL	REACTOME_REGULATION_OF_SIGNALING_BY_CBL	3/129	18/4668	0.0124174	0.0539592	0.0354104	Ubb/Ubc/Rps27a	3	REACTOME	up	NP
REACTOME_INACTIVATION_OF_CSF3_G_CSF_SIGNALING	REACTOME_INACTIVATION_OF_CSF3_G_CSF_SIGNALING	REACTOME_INACTIVATION_OF_CSF3_G_CSF_SIGNALING	3/129	19/4668	0.0144526	0.0622373	0.0408428	Ubb/Ubc/Rps27a	3	REACTOME	up	NP
REACTOME_E3_UBIQUITIN_LIGASES_UBIQUITINATE_TARGET_PROTEINS	REACTOME_E3_UBIQUITIN_LIGASES_UBIQUITINATE_TARGET_PROTEINS	REACTOME_E3_UBIQUITIN_LIGASES_UBIQUITINATE_TARGET_PROTEINS	4/129	36/4668	0.0165448	0.0658359	0.0432044	Ubb/Ubc/H2-Q10/Rps27a	4	REACTOME	up	NP
REACTOME_INTEGRIN_CELL_SURFACE_INTERACTIONS	REACTOME_INTEGRIN_CELL_SURFACE_INTERACTIONS	REACTOME_INTEGRIN_CELL_SURFACE_INTERACTIONS	4/129	36/4668	0.0165448	0.0658359	0.0432044	Vcam1/Fgb/Fgg/Fga	4	REACTOME	up	NP
REACTOME_SARS_COV_1_INFECTION	REACTOME_SARS_COV_1_INFECTION	REACTOME_SARS_COV_1_INFECTION	4/129	36/4668	0.0165448	0.0658359	0.0432044	Ubb/Ctsl/Ubc/Rps27a	4	REACTOME	up	NP
REACTOME_CALNEXIN_CALRETICULIN_CYCLE	REACTOME_CALNEXIN_CALRETICULIN_CYCLE	REACTOME_CALNEXIN_CALRETICULIN_CYCLE	3/129	20/4668	0.0166656	0.0658359	0.0432044	Ubb/Ubc/Rps27a	3	REACTOME	up	NP
REACTOME_DOWNREGULATION_OF_TGF_BETA_RECEPTOR_SIGNALING	REACTOME_DOWNREGULATION_OF_TGF_BETA_RECEPTOR_SIGNALING	REACTOME_DOWNREGULATION_OF_TGF_BETA_RECEPTOR_SIGNALING	3/129	20/4668	0.0166656	0.0658359	0.0432044	Ubb/Ubc/Rps27a	3	REACTOME	up	NP
REACTOME_EGFR_DOWNREGULATION	REACTOME_EGFR_DOWNREGULATION	REACTOME_EGFR_DOWNREGULATION	3/129	20/4668	0.0166656	0.0658359	0.0432044	Ubb/Ubc/Rps27a	3	REACTOME	up	NP
REACTOME_LATE_ENDOSOMAL_MICROAUTOPHAGY	REACTOME_LATE_ENDOSOMAL_MICROAUTOPHAGY	REACTOME_LATE_ENDOSOMAL_MICROAUTOPHAGY	3/129	20/4668	0.0166656	0.0658359	0.0432044	Ubb/Ubc/Rps27a	3	REACTOME	up	NP
REACTOME_PERK_REGULATES_GENE_EXPRESSION	REACTOME_PERK_REGULATES_GENE_EXPRESSION	REACTOME_PERK_REGULATES_GENE_EXPRESSION	3/129	20/4668	0.0166656	0.0658359	0.0432044	Hspa5/Cebpb/Herpud1	3	REACTOME	up	NP
REACTOME_SIGNALING_BY_NOTCH2	REACTOME_SIGNALING_BY_NOTCH2	REACTOME_SIGNALING_BY_NOTCH2	3/129	20/4668	0.0166656	0.0658359	0.0432044	Ubb/Ubc/Rps27a	3	REACTOME	up	NP
REACTOME_SYNTHESIS_OF_BILE_ACIDS_AND_BILE_SALTS_VIA_7ALPHA_HYDROXYCHOLESTEROL	REACTOME_SYNTHESIS_OF_BILE_ACIDS_AND_BILE_SALTS_VIA_7ALPHA_HYDROXYCHOLESTEROL	REACTOME_SYNTHESIS_OF_BILE_ACIDS_AND_BILE_SALTS_VIA_7ALPHA_HYDROXYCHOLESTEROL	3/129	20/4668	0.0166656	0.0658359	0.0432044	Scp2/Cyp8b1/Akr1c6	3	REACTOME	up	NP
REACTOME_BIOLOGICAL_OXIDATIONS	REACTOME_BIOLOGICAL_OXIDATIONS	REACTOME_BIOLOGICAL_OXIDATIONS	7/129	98/4668	0.018015	0.0695391	0.0456346	Mgst1/Gsta3/Cyp3a11/Cyp2e1/Cyp8b1/Mat1a/Hsp90ab1	7	REACTOME	up	NP
REACTOME_METABOLISM_OF_STEROIDS	REACTOME_METABOLISM_OF_STEROIDS	REACTOME_METABOLISM_OF_STEROIDS	7/129	99/4668	0.0189529	0.0695391	0.0456346	Alb/Scd1/Gc/Hsd11b1/Scp2/Cyp8b1/Akr1c6	7	REACTOME	up	NP
REACTOME_AGGREPHAGY	REACTOME_AGGREPHAGY	REACTOME_AGGREPHAGY	3/129	21/4668	0.0190578	0.0695391	0.0456346	Ubb/Ubc/Rps27a	3	REACTOME	up	NP
REACTOME_DAP12_INTERACTIONS	REACTOME_DAP12_INTERACTIONS	REACTOME_DAP12_INTERACTIONS	3/129	21/4668	0.0190578	0.0695391	0.0456346	B2m/H2-D1/H2-Q10	3	REACTOME	up	NP
REACTOME_DUAL_INCISION_IN_GG_NER	REACTOME_DUAL_INCISION_IN_GG_NER	REACTOME_DUAL_INCISION_IN_GG_NER	3/129	21/4668	0.0190578	0.0695391	0.0456346	Ubb/Ubc/Rps27a	3	REACTOME	up	NP
REACTOME_ENDOSOMAL_SORTING_COMPLEX_REQUIRED_FOR_TRANSPORT_ESCRT	REACTOME_ENDOSOMAL_SORTING_COMPLEX_REQUIRED_FOR_TRANSPORT_ESCRT	REACTOME_ENDOSOMAL_SORTING_COMPLEX_REQUIRED_FOR_TRANSPORT_ESCRT	3/129	21/4668	0.0190578	0.0695391	0.0456346	Ubb/Ubc/Rps27a	3	REACTOME	up	NP
REACTOME_MITOPHAGY	REACTOME_MITOPHAGY	REACTOME_MITOPHAGY	3/129	21/4668	0.0190578	0.0695391	0.0456346	Ubb/Ubc/Rps27a	3	REACTOME	up	NP
REACTOME_REGULATION_OF_TP53_EXPRESSION_AND_DEGRADATION	REACTOME_REGULATION_OF_TP53_EXPRESSION_AND_DEGRADATION	REACTOME_REGULATION_OF_TP53_EXPRESSION_AND_DEGRADATION	3/129	21/4668	0.0190578	0.0695391	0.0456346	Ubb/Ubc/Rps27a	3	REACTOME	up	NP
REACTOME_RIPK1_MEDIATED_REGULATED_NECROSIS	REACTOME_RIPK1_MEDIATED_REGULATED_NECROSIS	REACTOME_RIPK1_MEDIATED_REGULATED_NECROSIS	3/129	21/4668	0.0190578	0.0695391	0.0456346	Ubb/Ubc/Rps27a	3	REACTOME	up	NP
REACTOME_TNFR1_INDUCED_NFKAPPAB_SIGNALING_PATHWAY	REACTOME_TNFR1_INDUCED_NFKAPPAB_SIGNALING_PATHWAY	REACTOME_TNFR1_INDUCED_NFKAPPAB_SIGNALING_PATHWAY	3/129	21/4668	0.0190578	0.0695391	0.0456346	Ubb/Ubc/Rps27a	3	REACTOME	up	NP
REACTOME_INTEGRIN_SIGNALING	REACTOME_INTEGRIN_SIGNALING	REACTOME_INTEGRIN_SIGNALING	3/129	22/4668	0.0216301	0.0765867	0.0502595	Fgb/Fgg/Fga	3	REACTOME	up	NP
REACTOME_ONCOGENE_INDUCED_SENESCENCE	REACTOME_ONCOGENE_INDUCED_SENESCENCE	REACTOME_ONCOGENE_INDUCED_SENESCENCE	3/129	22/4668	0.0216301	0.0765867	0.0502595	Ubb/Ubc/Rps27a	3	REACTOME	up	NP
REACTOME_SIGNALING_BY_FGFR3	REACTOME_SIGNALING_BY_FGFR3	REACTOME_SIGNALING_BY_FGFR3	3/129	22/4668	0.0216301	0.0765867	0.0502595	Ubb/Ubc/Rps27a	3	REACTOME	up	NP
REACTOME_TAK1_ACTIVATES_NFKB_BY_PHOSPHORYLATION_AND_ACTIVATION_OF_IKKS_COMPLEX	REACTOME_TAK1_ACTIVATES_NFKB_BY_PHOSPHORYLATION_AND_ACTIVATION_OF_IKKS_COMPLEX	REACTOME_TAK1_ACTIVATES_NFKB_BY_PHOSPHORYLATION_AND_ACTIVATION_OF_IKKS_COMPLEX	3/129	22/4668	0.0216301	0.0765867	0.0502595	Ubb/Ubc/Rps27a	3	REACTOME	up	NP
REACTOME_NR1H2_AND_NR1H3_MEDIATED_SIGNALING	REACTOME_NR1H2_AND_NR1H3_MEDIATED_SIGNALING	REACTOME_NR1H2_AND_NR1H3_MEDIATED_SIGNALING	4/129	40/4668	0.023594	0.08266	0.0542451	Apoe/Scd1/Apoc1/Apoc4	4	REACTOME	up	NP
REACTOME_ARACHIDONIC_ACID_METABOLISM	REACTOME_ARACHIDONIC_ACID_METABOLISM	REACTOME_ARACHIDONIC_ACID_METABOLISM	3/129	23/4668	0.024383	0.08266	0.0542451	Cyp8b1/Hpgd/Gpx1	3	REACTOME	up	NP
REACTOME_DOWNREGULATION_OF_SMAD2_3_SMAD4_TRANSCRIPTIONAL_ACTIVITY	REACTOME_DOWNREGULATION_OF_SMAD2_3_SMAD4_TRANSCRIPTIONAL_ACTIVITY	REACTOME_DOWNREGULATION_OF_SMAD2_3_SMAD4_TRANSCRIPTIONAL_ACTIVITY	3/129	23/4668	0.024383	0.08266	0.0542451	Ubb/Ubc/Rps27a	3	REACTOME	up	NP
REACTOME_SIGNALING_BY_FGFR4	REACTOME_SIGNALING_BY_FGFR4	REACTOME_SIGNALING_BY_FGFR4	3/129	23/4668	0.024383	0.08266	0.0542451	Ubb/Ubc/Rps27a	3	REACTOME	up	NP
REACTOME_SMAD2_SMAD3_SMAD4_HETEROTRIMER_REGULATES_TRANSCRIPTION	REACTOME_SMAD2_SMAD3_SMAD4_HETEROTRIMER_REGULATES_TRANSCRIPTION	REACTOME_SMAD2_SMAD3_SMAD4_HETEROTRIMER_REGULATES_TRANSCRIPTION	3/129	23/4668	0.024383	0.08266	0.0542451	Ubb/Ubc/Rps27a	3	REACTOME	up	NP
REACTOME_TRANSLATION_OF_SARS_COV_1_STRUCTURAL_PROTEINS	REACTOME_TRANSLATION_OF_SARS_COV_1_STRUCTURAL_PROTEINS	REACTOME_TRANSLATION_OF_SARS_COV_1_STRUCTURAL_PROTEINS	3/129	23/4668	0.024383	0.08266	0.0542451	Ubb/Ubc/Rps27a	3	REACTOME	up	NP
REACTOME_REGULATION_OF_MRNA_STABILITY_BY_PROTEINS_THAT_BIND_AU_RICH_ELEMENTS	REACTOME_REGULATION_OF_MRNA_STABILITY_BY_PROTEINS_THAT_BIND_AU_RICH_ELEMENTS	REACTOME_REGULATION_OF_MRNA_STABILITY_BY_PROTEINS_THAT_BIND_AU_RICH_ELEMENTS	5/129	61/4668	0.0258019	0.0868543	0.0569976	Ubb/Ubc/Zfp36l1/Zfp36/Rps27a	5	REACTOME	up	NP
REACTOME_INTERFERON_SIGNALING	REACTOME_INTERFERON_SIGNALING	REACTOME_INTERFERON_SIGNALING	7/129	106/4668	0.0264968	0.0882239	0.0578964	Vcam1/Ubb/B2m/Ubc/H2-D1/H2-Q10/Rps27a	7	REACTOME	up	NP
REACTOME_DEACTIVATION_OF_THE_BETA_CATENIN_TRANSACTIVATING_COMPLEX	REACTOME_DEACTIVATION_OF_THE_BETA_CATENIN_TRANSACTIVATING_COMPLEX	REACTOME_DEACTIVATION_OF_THE_BETA_CATENIN_TRANSACTIVATING_COMPLEX	3/129	24/4668	0.0273162	0.0882239	0.0578964	Ubb/Ubc/Rps27a	3	REACTOME	up	NP
REACTOME_FLT3_SIGNALING_IN_DISEASE	REACTOME_FLT3_SIGNALING_IN_DISEASE	REACTOME_FLT3_SIGNALING_IN_DISEASE	3/129	24/4668	0.0273162	0.0882239	0.0578964	Ubb/Ubc/Rps27a	3	REACTOME	up	NP
REACTOME_HDR_THROUGH_HOMOLOGOUS_RECOMBINATION_HRR	REACTOME_HDR_THROUGH_HOMOLOGOUS_RECOMBINATION_HRR	REACTOME_HDR_THROUGH_HOMOLOGOUS_RECOMBINATION_HRR	3/129	24/4668	0.0273162	0.0882239	0.0578964	Ubb/Ubc/Rps27a	3	REACTOME	up	NP
REACTOME_SIGNALING_BY_CSF3_G_CSF	REACTOME_SIGNALING_BY_CSF3_G_CSF	REACTOME_SIGNALING_BY_CSF3_G_CSF	3/129	24/4668	0.0273162	0.0882239	0.0578964	Ubb/Ubc/Rps27a	3	REACTOME	up	NP
REACTOME_SYNTHESIS_OF_ACTIVE_UBIQUITIN_ROLES_OF_E1_AND_E2_ENZYMES	REACTOME_SYNTHESIS_OF_ACTIVE_UBIQUITIN_ROLES_OF_E1_AND_E2_ENZYMES	REACTOME_SYNTHESIS_OF_ACTIVE_UBIQUITIN_ROLES_OF_E1_AND_E2_ENZYMES	3/129	24/4668	0.0273162	0.0882239	0.0578964	Ubb/Ubc/Rps27a	3	REACTOME	up	NP
REACTOME_THE_CITRIC_ACID_TCA_CYCLE_AND_RESPIRATORY_ELECTRON_TRANSPORT	REACTOME_THE_CITRIC_ACID_TCA_CYCLE_AND_RESPIRATORY_ELECTRON_TRANSPORT	REACTOME_THE_CITRIC_ACID_TCA_CYCLE_AND_RESPIRATORY_ELECTRON_TRANSPORT	8/129	132/4668	0.0287632	0.0914792	0.0600326	mt-Nd4/Ndufa4/Cox8a/Cox7c/mt-Atp6/Uqcrb/mt-Nd1/mt-Co2	8	REACTOME	up	NP
REACTOME_EXTRACELLULAR_MATRIX_ORGANIZATION	REACTOME_EXTRACELLULAR_MATRIX_ORGANIZATION	REACTOME_EXTRACELLULAR_MATRIX_ORGANIZATION	7/129	108/4668	0.0289826	0.0914792	0.0600326	Ttr/Vcam1/Fgb/Fgg/Ctsl/Plg/Fga	7	REACTOME	up	NP
REACTOME_ABC_TRANSPORTERS_IN_LIPID_HOMEOSTASIS	REACTOME_ABC_TRANSPORTERS_IN_LIPID_HOMEOSTASIS	REACTOME_ABC_TRANSPORTERS_IN_LIPID_HOMEOSTASIS	2/129	4668-10-01	0.0294923	0.0914792	0.0600326	Apoa1/Abca9	2	REACTOME	up	NP
REACTOME_CREATION_OF_C4_AND_C2_ACTIVATORS	REACTOME_CREATION_OF_C4_AND_C2_ACTIVATORS	REACTOME_CREATION_OF_C4_AND_C2_ACTIVATORS	2/129	4668-10-01	0.0294923	0.0914792	0.0600326	C1qa/C1qc	2	REACTOME	up	NP
REACTOME_SYNTHESIS_OF_BILE_ACIDS_AND_BILE_SALTS_VIA_24_HYDROXYCHOLESTEROL	REACTOME_SYNTHESIS_OF_BILE_ACIDS_AND_BILE_SALTS_VIA_24_HYDROXYCHOLESTEROL	REACTOME_SYNTHESIS_OF_BILE_ACIDS_AND_BILE_SALTS_VIA_24_HYDROXYCHOLESTEROL	2/129	4668-10-01	0.0294923	0.0914792	0.0600326	Cyp8b1/Akr1c6	2	REACTOME	up	NP
REACTOME_THE_ROLE_OF_GTSE1_IN_G2_M_PROGRESSION_AFTER_G2_CHECKPOINT	REACTOME_THE_ROLE_OF_GTSE1_IN_G2_M_PROGRESSION_AFTER_G2_CHECKPOINT	REACTOME_THE_ROLE_OF_GTSE1_IN_G2_M_PROGRESSION_AFTER_G2_CHECKPOINT	4/129	43/4668	0.0299151	0.0914792	0.0600326	Ubb/Ubc/Rps27a/Hsp90ab1	4	REACTOME	up	NP
REACTOME_DNA_DAMAGE_BYPASS	REACTOME_DNA_DAMAGE_BYPASS	REACTOME_DNA_DAMAGE_BYPASS	3/129	25/4668	0.0304293	0.0914792	0.0600326	Ubb/Ubc/Rps27a	3	REACTOME	up	NP
REACTOME_DNA_DAMAGE_RECOGNITION_IN_GG_NER	REACTOME_DNA_DAMAGE_RECOGNITION_IN_GG_NER	REACTOME_DNA_DAMAGE_RECOGNITION_IN_GG_NER	3/129	25/4668	0.0304293	0.0914792	0.0600326	Ubb/Ubc/Rps27a	3	REACTOME	up	NP
REACTOME_REGULATION_OF_TNFR1_SIGNALING	REACTOME_REGULATION_OF_TNFR1_SIGNALING	REACTOME_REGULATION_OF_TNFR1_SIGNALING	3/129	25/4668	0.0304293	0.0914792	0.0600326	Ubb/Ubc/Rps27a	3	REACTOME	up	NP
REACTOME_SIGNALING_BY_FGFR1	REACTOME_SIGNALING_BY_FGFR1	REACTOME_SIGNALING_BY_FGFR1	3/129	25/4668	0.0304293	0.0914792	0.0600326	Ubb/Ubc/Rps27a	3	REACTOME	up	NP
REACTOME_TGF_BETA_RECEPTOR_SIGNALING_ACTIVATES_SMADS	REACTOME_TGF_BETA_RECEPTOR_SIGNALING_ACTIVATES_SMADS	REACTOME_TGF_BETA_RECEPTOR_SIGNALING_ACTIVATES_SMADS	3/129	25/4668	0.0304293	0.0914792	0.0600326	Ubb/Ubc/Rps27a	3	REACTOME	up	NP
REACTOME_TP53_REGULATES_METABOLIC_GENES	REACTOME_TP53_REGULATES_METABOLIC_GENES	REACTOME_TP53_REGULATES_METABOLIC_GENES	5/129	65/4668	0.03285	0.0981393	0.0644032	Ndufa4/Cox8a/Cox7c/Pten/mt-Co2	5	REACTOME	up	NP
REACTOME_NEGATIVE_REGULATORS_OF_DDX58_IFIH1_SIGNALING	REACTOME_NEGATIVE_REGULATORS_OF_DDX58_IFIH1_SIGNALING	REACTOME_NEGATIVE_REGULATORS_OF_DDX58_IFIH1_SIGNALING	3/129	26/4668	0.0337212	0.0988879	0.0648945	Ubb/Ubc/Rps27a	3	REACTOME	up	NP
REACTOME_NOD1_2_SIGNALING_PATHWAY	REACTOME_NOD1_2_SIGNALING_PATHWAY	REACTOME_NOD1_2_SIGNALING_PATHWAY	3/129	26/4668	0.0337212	0.0988879	0.0648945	Ubb/Ubc/Rps27a	3	REACTOME	up	NP
REACTOME_SYNTHESIS_OF_BILE_ACIDS_AND_BILE_SALTS	REACTOME_SYNTHESIS_OF_BILE_ACIDS_AND_BILE_SALTS	REACTOME_SYNTHESIS_OF_BILE_ACIDS_AND_BILE_SALTS	3/129	26/4668	0.0337212	0.0988879	0.0648945	Scp2/Cyp8b1/Akr1c6	3	REACTOME	up	NP
REACTOME_INTERFERON_GAMMA_SIGNALING	REACTOME_INTERFERON_GAMMA_SIGNALING	REACTOME_INTERFERON_GAMMA_SIGNALING	4/129	45/4668	0.034635	0.100948	0.0662466	Vcam1/B2m/H2-D1/H2-Q10	4	REACTOME	up	NP
REACTOME_INFLAMMASOMES	REACTOME_INFLAMMASOMES	REACTOME_INFLAMMASOMES	2/129	4668-11-01	0.0354035	0.101335	0.0665001	Txnip/Hsp90ab1	2	REACTOME	up	NP
REACTOME_TRYPTOPHAN_CATABOLISM	REACTOME_TRYPTOPHAN_CATABOLISM	REACTOME_TRYPTOPHAN_CATABOLISM	2/129	4668-11-01	0.0354035	0.101335	0.0665001	Tdo2/Slc3a2	2	REACTOME	up	NP
REACTOME_XENOBIOTICS	REACTOME_XENOBIOTICS	REACTOME_XENOBIOTICS	2/129	4668-11-01	0.0354035	0.101335	0.0665001	Cyp3a11/Cyp2e1	2	REACTOME	up	NP
REACTOME_N_GLYCAN_TRIMMING_IN_THE_ER_AND_CALNEXIN_CALRETICULIN_CYCLE	REACTOME_N_GLYCAN_TRIMMING_IN_THE_ER_AND_CALNEXIN_CALRETICULIN_CYCLE	REACTOME_N_GLYCAN_TRIMMING_IN_THE_ER_AND_CALNEXIN_CALRETICULIN_CYCLE	3/129	27/4668	0.0371907	0.105479	0.0692198	Ubb/Ubc/Rps27a	3	REACTOME	up	NP
REACTOME_HOST_INTERACTIONS_OF_HIV_FACTORS	REACTOME_HOST_INTERACTIONS_OF_HIV_FACTORS	REACTOME_HOST_INTERACTIONS_OF_HIV_FACTORS	6/129	90/4668	0.0372928	0.105479	0.0692198	Ubb/B2m/Ubc/H2-Q10/Rps27a/Ppia	6	REACTOME	up	NP
REACTOME_ABC_FAMILY_PROTEINS_MEDIATED_TRANSPORT	REACTOME_ABC_FAMILY_PROTEINS_MEDIATED_TRANSPORT	REACTOME_ABC_FAMILY_PROTEINS_MEDIATED_TRANSPORT	5/129	68/4668	0.0388548	0.109251	0.071695	Apoa1/Ubb/Abca9/Ubc/Rps27a	5	REACTOME	up	NP
REACTOME_INTERLEUKIN_17_SIGNALING	REACTOME_INTERLEUKIN_17_SIGNALING	REACTOME_INTERLEUKIN_17_SIGNALING	4/129	47/4668	0.0397641	0.111154	0.0729437	Ubb/Ubc/Mef2a/Rps27a	4	REACTOME	up	NP
REACTOME_AMINO_ACID_TRANSPORT_ACROSS_THE_PLASMA_MEMBRANE	REACTOME_AMINO_ACID_TRANSPORT_ACROSS_THE_PLASMA_MEMBRANE	REACTOME_AMINO_ACID_TRANSPORT_ACROSS_THE_PLASMA_MEMBRANE	2/129	4668-12-01	0.0417285	0.115296	0.0756623	Slc38a4/Slc3a2	2	REACTOME	up	NP
REACTOME_SYNTHESIS_OF_BILE_ACIDS_AND_BILE_SALTS_VIA_27_HYDROXYCHOLESTEROL	REACTOME_SYNTHESIS_OF_BILE_ACIDS_AND_BILE_SALTS_VIA_27_HYDROXYCHOLESTEROL	REACTOME_SYNTHESIS_OF_BILE_ACIDS_AND_BILE_SALTS_VIA_27_HYDROXYCHOLESTEROL	2/129	4668-12-01	0.0417285	0.115296	0.0756623	Cyp8b1/Akr1c6	2	REACTOME	up	NP
REACTOME_DDX58_IFIH1_MEDIATED_INDUCTION_OF_INTERFERON_ALPHA_BETA	REACTOME_DDX58_IFIH1_MEDIATED_INDUCTION_OF_INTERFERON_ALPHA_BETA	REACTOME_DDX58_IFIH1_MEDIATED_INDUCTION_OF_INTERFERON_ALPHA_BETA	4/129	48/4668	0.0424828	0.116706	0.0765873	Ubb/Ubc/Rps27a/Hsp90ab1	4	REACTOME	up	NP
REACTOME_ATTENUATION_PHASE	REACTOME_ATTENUATION_PHASE	REACTOME_ATTENUATION_PHASE	2/129	13/4668	0.0484403	0.129181	0.0847743	Ubb/Hsp90ab1	2	REACTOME	up	NP
REACTOME_GLUTATHIONE_CONJUGATION	REACTOME_GLUTATHIONE_CONJUGATION	REACTOME_GLUTATHIONE_CONJUGATION	2/129	13/4668	0.0484403	0.129181	0.0847743	Mgst1/Gsta3	2	REACTOME	up	NP
REACTOME_NEF_MEDIATES_DOWN_MODULATION_OF_CELL_SURFACE_RECEPTORS_BY_RECRUITING_THEM_TO_CLATHRIN_ADAPTERS	REACTOME_NEF_MEDIATES_DOWN_MODULATION_OF_CELL_SURFACE_RECEPTORS_BY_RECRUITING_THEM_TO_CLATHRIN_ADAPTERS	REACTOME_NEF_MEDIATES_DOWN_MODULATION_OF_CELL_SURFACE_RECEPTORS_BY_RECRUITING_THEM_TO_CLATHRIN_ADAPTERS	2/129	13/4668	0.0484403	0.129181	0.0847743	B2m/H2-Q10	2	REACTOME	up	NP
REACTOME_FLT3_SIGNALING	REACTOME_FLT3_SIGNALING	REACTOME_FLT3_SIGNALING	3/129	30/4668	0.0486456	0.129181	0.0847743	Ubb/Ubc/Rps27a	3	REACTOME	up	NP
REACTOME_MAP2K_AND_MAPK_ACTIVATION	REACTOME_MAP2K_AND_MAPK_ACTIVATION	REACTOME_MAP2K_AND_MAPK_ACTIVATION	3/129	30/4668	0.0486456	0.129181	0.0847743	Fgb/Fgg/Fga	3	REACTOME	up	NP
REACTOME_SIGNALING_BY_NOTCH3	REACTOME_SIGNALING_BY_NOTCH3	REACTOME_SIGNALING_BY_NOTCH3	3/129	30/4668	0.0486456	0.129181	0.0847743	Ubb/Ubc/Rps27a	3	REACTOME	up	NP
REACTOME_REGULATION_OF_PTEN_STABILITY_AND_ACTIVITY	REACTOME_REGULATION_OF_PTEN_STABILITY_AND_ACTIVITY	REACTOME_REGULATION_OF_PTEN_STABILITY_AND_ACTIVITY	4/129	51/4668	0.051255	0.135358	0.088828	Ubb/Ubc/Pten/Rps27a	4	REACTOME	up	NP
REACTOME_CYTOCHROME_P450_ARRANGED_BY_SUBSTRATE_TYPE	REACTOME_CYTOCHROME_P450_ARRANGED_BY_SUBSTRATE_TYPE	REACTOME_CYTOCHROME_P450_ARRANGED_BY_SUBSTRATE_TYPE	3/129	31/4668	0.0528051	0.137178	0.0900224	Cyp3a11/Cyp2e1/Cyp8b1	3	REACTOME	up	NP
REACTOME_DNA_DOUBLE_STRAND_BREAK_RESPONSE	REACTOME_DNA_DOUBLE_STRAND_BREAK_RESPONSE	REACTOME_DNA_DOUBLE_STRAND_BREAK_RESPONSE	3/129	31/4668	0.0528051	0.137178	0.0900224	Ubb/Ubc/Rps27a	3	REACTOME	up	NP
REACTOME_TNF_SIGNALING	REACTOME_TNF_SIGNALING	REACTOME_TNF_SIGNALING	3/129	31/4668	0.0528051	0.137178	0.0900224	Ubb/Ubc/Rps27a	3	REACTOME	up	NP
REACTOME_PROTEIN_UBIQUITINATION	REACTOME_PROTEIN_UBIQUITINATION	REACTOME_PROTEIN_UBIQUITINATION	4/129	52/4668	0.0543836	0.13976	0.0917166	Ubb/Ubc/H2-Q10/Rps27a	4	REACTOME	up	NP
REACTOME_SARS_COV_2_INFECTION	REACTOME_SARS_COV_2_INFECTION	REACTOME_SARS_COV_2_INFECTION	4/129	52/4668	0.0543836	0.13976	0.0917166	Ubb/Ctsl/Ubc/Rps27a	4	REACTOME	up	NP
REACTOME_INTRINSIC_PATHWAY_OF_FIBRIN_CLOT_FORMATION	REACTOME_INTRINSIC_PATHWAY_OF_FIBRIN_CLOT_FORMATION	REACTOME_INTRINSIC_PATHWAY_OF_FIBRIN_CLOT_FORMATION	2/129	14/4668	0.055513	0.1419	0.0931207	F2/Serpinc1	2	REACTOME	up	NP
REACTOME_FORMATION_OF_INCISION_COMPLEX_IN_GG_NER	REACTOME_FORMATION_OF_INCISION_COMPLEX_IN_GG_NER	REACTOME_FORMATION_OF_INCISION_COMPLEX_IN_GG_NER	3/129	32/4668	0.0571306	0.144489	0.0948199	Ubb/Ubc/Rps27a	3	REACTOME	up	NP
REACTOME_FORMATION_OF_TC_NER_PRE_INCISION_COMPLEX	REACTOME_FORMATION_OF_TC_NER_PRE_INCISION_COMPLEX	REACTOME_FORMATION_OF_TC_NER_PRE_INCISION_COMPLEX	3/129	32/4668	0.0571306	0.144489	0.0948199	Ubb/Ubc/Rps27a	3	REACTOME	up	NP
REACTOME_MAPK_FAMILY_SIGNALING_CASCADES	REACTOME_MAPK_FAMILY_SIGNALING_CASCADES	REACTOME_MAPK_FAMILY_SIGNALING_CASCADES	9/129	180/4668	0.0599475	0.150815	0.0989716	Fgb/Fgg/Ubb/Csf2ra/Ubc/Dusp1/Ccnd3/Rps27a/Fga	9	REACTOME	up	NP
REACTOME_PHASE_I_FUNCTIONALIZATION_OF_COMPOUNDS	REACTOME_PHASE_I_FUNCTIONALIZATION_OF_COMPOUNDS	REACTOME_PHASE_I_FUNCTIONALIZATION_OF_COMPOUNDS	4/129	54/4668	0.0609453	0.151046	0.0991227	Cyp3a11/Cyp2e1/Cyp8b1/Hsp90ab1	4	REACTOME	up	NP
REACTOME_DUAL_INCISION_IN_TC_NER	REACTOME_DUAL_INCISION_IN_TC_NER	REACTOME_DUAL_INCISION_IN_TC_NER	3/129	33/4668	0.0616191	0.151046	0.0991227	Ubb/Ubc/Rps27a	3	REACTOME	up	NP
REACTOME_NR1H3_NR1H2_REGULATE_GENE_EXPRESSION_LINKED_TO_CHOLESTEROL_TRANSPORT_AND_EFFLUX	REACTOME_NR1H3_NR1H2_REGULATE_GENE_EXPRESSION_LINKED_TO_CHOLESTEROL_TRANSPORT_AND_EFFLUX	REACTOME_NR1H3_NR1H2_REGULATE_GENE_EXPRESSION_LINKED_TO_CHOLESTEROL_TRANSPORT_AND_EFFLUX	3/129	33/4668	0.0616191	0.151046	0.0991227	Apoe/Apoc1/Apoc4	3	REACTOME	up	NP
REACTOME_REGULATED_NECROSIS	REACTOME_REGULATED_NECROSIS	REACTOME_REGULATED_NECROSIS	3/129	33/4668	0.0616191	0.151046	0.0991227	Ubb/Ubc/Rps27a	3	REACTOME	up	NP
REACTOME_SIGNALING_BY_PTK6	REACTOME_SIGNALING_BY_PTK6	REACTOME_SIGNALING_BY_PTK6	3/129	33/4668	0.0616191	0.151046	0.0991227	Ubb/Ubc/Rps27a	3	REACTOME	up	NP
REACTOME_ATF4_ACTIVATES_GENES_IN_RESPONSE_TO_ENDOPLASMIC_RETICULUM_STRESS	REACTOME_ATF4_ACTIVATES_GENES_IN_RESPONSE_TO_ENDOPLASMIC_RETICULUM_STRESS	REACTOME_ATF4_ACTIVATES_GENES_IN_RESPONSE_TO_ENDOPLASMIC_RETICULUM_STRESS	2/129	15/4668	0.062922	0.151903	0.099685	Cebpb/Herpud1	2	REACTOME	up	NP
REACTOME_INITIAL_TRIGGERING_OF_COMPLEMENT	REACTOME_INITIAL_TRIGGERING_OF_COMPLEMENT	REACTOME_INITIAL_TRIGGERING_OF_COMPLEMENT	2/129	15/4668	0.062922	0.151903	0.099685	C1qa/C1qc	2	REACTOME	up	NP
REACTOME_PURINERGIC_SIGNALING_IN_LEISHMANIASIS_INFECTION	REACTOME_PURINERGIC_SIGNALING_IN_LEISHMANIASIS_INFECTION	REACTOME_PURINERGIC_SIGNALING_IN_LEISHMANIASIS_INFECTION	2/129	15/4668	0.062922	0.151903	0.099685	Txnip/Hsp90ab1	2	REACTOME	up	NP
REACTOME_ABC_TRANSPORTER_DISORDERS	REACTOME_ABC_TRANSPORTER_DISORDERS	REACTOME_ABC_TRANSPORTER_DISORDERS	4/129	55/4668	0.0643771	0.154634	0.101478	Apoa1/Ubb/Ubc/Rps27a	4	REACTOME	up	NP
REACTOME_CYTOSOLIC_SENSORS_OF_PATHOGEN_ASSOCIATED_DNA	REACTOME_CYTOSOLIC_SENSORS_OF_PATHOGEN_ASSOCIATED_DNA	REACTOME_CYTOSOLIC_SENSORS_OF_PATHOGEN_ASSOCIATED_DNA	3/129	34/4668	0.0662672	0.158379	0.103935	Ubb/Ubc/Rps27a	3	REACTOME	up	NP
REACTOME_DISEASES_OF_METABOLISM	REACTOME_DISEASES_OF_METABOLISM	REACTOME_DISEASES_OF_METABOLISM	6/129	105/4668	0.0693199	0.164117	0.107701	Ubb/Csf2ra/Ubc/Mat1a/Aldob/Rps27a	6	REACTOME	up	NP
REACTOME_METABOLISM_OF_PORPHYRINS	REACTOME_METABOLISM_OF_PORPHYRINS	REACTOME_METABOLISM_OF_PORPHYRINS	2/129	16/4668	0.0706435	0.164117	0.107701	Alb/Fabp1	2	REACTOME	up	NP
REACTOME_PROCESSING_OF_DNA_DOUBLE_STRAND_BREAK_ENDS	REACTOME_PROCESSING_OF_DNA_DOUBLE_STRAND_BREAK_ENDS	REACTOME_PROCESSING_OF_DNA_DOUBLE_STRAND_BREAK_ENDS	3/129	35/4668	0.0710716	0.164117	0.107701	Ubb/Ubc/Rps27a	3	REACTOME	up	NP
REACTOME_SIGNALING_BY_ERBB2	REACTOME_SIGNALING_BY_ERBB2	REACTOME_SIGNALING_BY_ERBB2	3/129	35/4668	0.0710716	0.164117	0.107701	Ubb/Ubc/Rps27a	3	REACTOME	up	NP
REACTOME_SIGNALING_BY_FGFR2	REACTOME_SIGNALING_BY_FGFR2	REACTOME_SIGNALING_BY_FGFR2	3/129	35/4668	0.0710716	0.164117	0.107701	Ubb/Ubc/Rps27a	3	REACTOME	up	NP
REACTOME_SIGNALING_BY_MODERATE_KINASE_ACTIVITY_BRAF_MUTANTS	REACTOME_SIGNALING_BY_MODERATE_KINASE_ACTIVITY_BRAF_MUTANTS	REACTOME_SIGNALING_BY_MODERATE_KINASE_ACTIVITY_BRAF_MUTANTS	3/129	35/4668	0.0710716	0.164117	0.107701	Fgb/Fgg/Fga	3	REACTOME	up	NP
REACTOME_TRANSCRIPTIONAL_ACTIVITY_OF_SMAD2_SMAD3_SMAD4_HETEROTRIMER	REACTOME_TRANSCRIPTIONAL_ACTIVITY_OF_SMAD2_SMAD3_SMAD4_HETEROTRIMER	REACTOME_TRANSCRIPTIONAL_ACTIVITY_OF_SMAD2_SMAD3_SMAD4_HETEROTRIMER	3/129	35/4668	0.0710716	0.164117	0.107701	Ubb/Ubc/Rps27a	3	REACTOME	up	NP
REACTOME_NOTCH1_INTRACELLULAR_DOMAIN_REGULATES_TRANSCRIPTION	REACTOME_NOTCH1_INTRACELLULAR_DOMAIN_REGULATES_TRANSCRIPTION	REACTOME_NOTCH1_INTRACELLULAR_DOMAIN_REGULATES_TRANSCRIPTION	3/129	36/4668	0.0760286	0.17472	0.114659	Ubb/Ubc/Rps27a	3	REACTOME	up	NP
REACTOME_FATTY_ACID_METABOLISM	REACTOME_FATTY_ACID_METABOLISM	REACTOME_FATTY_ACID_METABOLISM	6/129	108/4668	0.0771914	0.176543	0.115855	Scd1/Dbi/Scp2/Cyp8b1/Hpgd/Gpx1	6	REACTOME	up	NP
REACTOME_MAPK6_MAPK4_SIGNALING	REACTOME_MAPK6_MAPK4_SIGNALING	REACTOME_MAPK6_MAPK4_SIGNALING	4/129	59/4668	0.0790914	0.180027	0.118142	Ubb/Ubc/Ccnd3/Rps27a	4	REACTOME	up	NP
REACTOME_SIGNALING_BY_EGFR	REACTOME_SIGNALING_BY_EGFR	REACTOME_SIGNALING_BY_EGFR	3/129	37/4668	0.0811344	0.183802	0.120619	Ubb/Ubc/Rps27a	3	REACTOME	up	NP
REACTOME_CLASS_I_MHC_MEDIATED_ANTIGEN_PROCESSING_PRESENTATION	REACTOME_CLASS_I_MHC_MEDIATED_ANTIGEN_PROCESSING_PRESENTATION	REACTOME_CLASS_I_MHC_MEDIATED_ANTIGEN_PROCESSING_PRESENTATION	11/129	249/4668	0.0816227	0.184036	0.120772	Fgb/Fgg/Ubb/Ctsl/B2m/Ubc/Hspa5/H2-D1/H2-Q10/Rps27a/Fga	11	REACTOME	up	NP
REACTOME_DOWNSTREAM_SIGNALING_EVENTS_OF_B_CELL_RECEPTOR_BCR	REACTOME_DOWNSTREAM_SIGNALING_EVENTS_OF_B_CELL_RECEPTOR_BCR	REACTOME_DOWNSTREAM_SIGNALING_EVENTS_OF_B_CELL_RECEPTOR_BCR	4/129	60/4668	0.0830118	0.186289	0.122251	Ubb/Ubc/Rps27a/Ppia	4	REACTOME	up	NP
REACTOME_MITOCHONDRIAL_PROTEIN_IMPORT	REACTOME_MITOCHONDRIAL_PROTEIN_IMPORT	REACTOME_MITOCHONDRIAL_PROTEIN_IMPORT	3/129	38/4668	0.0863851	0.190286	0.124874	Chchd2/Otc/Chchd10	3	REACTOME	up	NP
REACTOME_SCF_SKP2_MEDIATED_DEGRADATION_OF_P27_P21	REACTOME_SCF_SKP2_MEDIATED_DEGRADATION_OF_P27_P21	REACTOME_SCF_SKP2_MEDIATED_DEGRADATION_OF_P27_P21	3/129	38/4668	0.0863851	0.190286	0.124874	Ubb/Ubc/Rps27a	3	REACTOME	up	NP
REACTOME_TRANSCRIPTIONAL_REGULATION_BY_MECP2	REACTOME_TRANSCRIPTIONAL_REGULATION_BY_MECP2	REACTOME_TRANSCRIPTIONAL_REGULATION_BY_MECP2	3/129	38/4668	0.0863851	0.190286	0.124874	Fkbp5/Pten/Gamt	3	REACTOME	up	NP
REACTOME_TRANSLATION_OF_SARS_COV_2_STRUCTURAL_PROTEINS	REACTOME_TRANSLATION_OF_SARS_COV_2_STRUCTURAL_PROTEINS	REACTOME_TRANSLATION_OF_SARS_COV_2_STRUCTURAL_PROTEINS	3/129	38/4668	0.0863851	0.190286	0.124874	Ubb/Ubc/Rps27a	3	REACTOME	up	NP
REACTOME_CELLULAR_RESPONSE_TO_HEAT_STRESS	REACTOME_CELLULAR_RESPONSE_TO_HEAT_STRESS	REACTOME_CELLULAR_RESPONSE_TO_HEAT_STRESS	4/129	62/4668	0.0911343	0.198914	0.130536	Ubb/Eef1a1/Hspa5/Hsp90ab1	4	REACTOME	up	NP
REACTOME_TOLL_LIKE_RECEPTOR_9_TLR9_CASCADE	REACTOME_TOLL_LIKE_RECEPTOR_9_TLR9_CASCADE	REACTOME_TOLL_LIKE_RECEPTOR_9_TLR9_CASCADE	4/129	62/4668	0.0911343	0.198914	0.130536	Ubb/Ubc/Mef2a/Rps27a	4	REACTOME	up	NP
REACTOME_NEGATIVE_REGULATION_OF_NOTCH4_SIGNALING	REACTOME_NEGATIVE_REGULATION_OF_NOTCH4_SIGNALING	REACTOME_NEGATIVE_REGULATION_OF_NOTCH4_SIGNALING	3/129	39/4668	0.0917767	0.199406	0.130859	Ubb/Ubc/Rps27a	3	REACTOME	up	NP
REACTOME_THE_ROLE_OF_NEF_IN_HIV_1_REPLICATION_AND_DISEASE_PATHOGENESIS	REACTOME_THE_ROLE_OF_NEF_IN_HIV_1_REPLICATION_AND_DISEASE_PATHOGENESIS	REACTOME_THE_ROLE_OF_NEF_IN_HIV_1_REPLICATION_AND_DISEASE_PATHOGENESIS	2/129	19/4668	0.0954619	0.206474	0.135497	B2m/H2-Q10	2	REACTOME	up	NP
REACTOME_ASYMMETRIC_LOCALIZATION_OF_PCP_PROTEINS	REACTOME_ASYMMETRIC_LOCALIZATION_OF_PCP_PROTEINS	REACTOME_ASYMMETRIC_LOCALIZATION_OF_PCP_PROTEINS	3/129	40/4668	0.097305	0.207642	0.136264	Ubb/Ubc/Rps27a	3	REACTOME	up	NP
REACTOME_AUF1_HNRNP_D0_BINDS_AND_DESTABILIZES_MRNA	REACTOME_AUF1_HNRNP_D0_BINDS_AND_DESTABILIZES_MRNA	REACTOME_AUF1_HNRNP_D0_BINDS_AND_DESTABILIZES_MRNA	3/129	40/4668	0.097305	0.207642	0.136264	Ubb/Ubc/Rps27a	3	REACTOME	up	NP
REACTOME_CDT1_ASSOCIATION_WITH_THE_CDC6_ORC_ORIGIN_COMPLEX	REACTOME_CDT1_ASSOCIATION_WITH_THE_CDC6_ORC_ORIGIN_COMPLEX	REACTOME_CDT1_ASSOCIATION_WITH_THE_CDC6_ORC_ORIGIN_COMPLEX	3/129	40/4668	0.097305	0.207642	0.136264	Ubb/Ubc/Rps27a	3	REACTOME	up	NP
REACTOME_DEGRADATION_OF_AXIN	REACTOME_DEGRADATION_OF_AXIN	REACTOME_DEGRADATION_OF_AXIN	3/129	41/4668	0.102966	0.214924	0.141043	Ubb/Ubc/Rps27a	3	REACTOME	up	NP
REACTOME_DEGRADATION_OF_DVL	REACTOME_DEGRADATION_OF_DVL	REACTOME_DEGRADATION_OF_DVL	3/129	41/4668	0.102966	0.214924	0.141043	Ubb/Ubc/Rps27a	3	REACTOME	up	NP
REACTOME_REGULATION_OF_RUNX3_EXPRESSION_AND_ACTIVITY	REACTOME_REGULATION_OF_RUNX3_EXPRESSION_AND_ACTIVITY	REACTOME_REGULATION_OF_RUNX3_EXPRESSION_AND_ACTIVITY	3/129	41/4668	0.102966	0.214924	0.141043	Ubb/Ubc/Rps27a	3	REACTOME	up	NP
REACTOME_SIGNALING_BY_NOTCH1_PEST_DOMAIN_MUTANTS_IN_CANCER	REACTOME_SIGNALING_BY_NOTCH1_PEST_DOMAIN_MUTANTS_IN_CANCER	REACTOME_SIGNALING_BY_NOTCH1_PEST_DOMAIN_MUTANTS_IN_CANCER	3/129	41/4668	0.102966	0.214924	0.141043	Ubb/Ubc/Rps27a	3	REACTOME	up	NP
REACTOME_TRANSCRIPTION_COUPLED_NUCLEOTIDE_EXCISION_REPAIR_TC_NER	REACTOME_TRANSCRIPTION_COUPLED_NUCLEOTIDE_EXCISION_REPAIR_TC_NER	REACTOME_TRANSCRIPTION_COUPLED_NUCLEOTIDE_EXCISION_REPAIR_TC_NER	3/129	41/4668	0.102966	0.214924	0.141043	Ubb/Ubc/Rps27a	3	REACTOME	up	NP
REACTOME_CARGO_RECOGNITION_FOR_CLATHRIN_MEDIATED_ENDOCYTOSIS	REACTOME_CARGO_RECOGNITION_FOR_CLATHRIN_MEDIATED_ENDOCYTOSIS	REACTOME_CARGO_RECOGNITION_FOR_CLATHRIN_MEDIATED_ENDOCYTOSIS	4/129	65/4668	0.104002	0.215653	0.14152	Trf/Ubb/Ubc/Rps27a	4	REACTOME	up	NP
REACTOME_HSF1_DEPENDENT_TRANSACTIVATION	REACTOME_HSF1_DEPENDENT_TRANSACTIVATION	REACTOME_HSF1_DEPENDENT_TRANSACTIVATION	2/129	20/4668	0.104217	0.215653	0.14152	Ubb/Hsp90ab1	2	REACTOME	up	NP
REACTOME_MYD88_INDEPENDENT_TLR4_CASCADE	REACTOME_MYD88_INDEPENDENT_TLR4_CASCADE	REACTOME_MYD88_INDEPENDENT_TLR4_CASCADE	4/129	66/4668	0.108468	0.221212	0.145169	Ubb/Ubc/Mef2a/Rps27a	4	REACTOME	up	NP
REACTOME_ORC1_REMOVAL_FROM_CHROMATIN	REACTOME_ORC1_REMOVAL_FROM_CHROMATIN	REACTOME_ORC1_REMOVAL_FROM_CHROMATIN	3/129	42/4668	0.108755	0.221212	0.145169	Ubb/Ubc/Rps27a	3	REACTOME	up	NP
REACTOME_SIGNALING_BY_FGFR	REACTOME_SIGNALING_BY_FGFR	REACTOME_SIGNALING_BY_FGFR	3/129	42/4668	0.108755	0.221212	0.145169	Ubb/Ubc/Rps27a	3	REACTOME	up	NP
REACTOME_STABILIZATION_OF_P53	REACTOME_STABILIZATION_OF_P53	REACTOME_STABILIZATION_OF_P53	3/129	42/4668	0.108755	0.221212	0.145169	Ubb/Ubc/Rps27a	3	REACTOME	up	NP
REACTOME_REGULATION_OF_LIPID_METABOLISM_BY_PPARALPHA	REACTOME_REGULATION_OF_LIPID_METABOLISM_BY_PPARALPHA	REACTOME_REGULATION_OF_LIPID_METABOLISM_BY_PPARALPHA	5/129	92/4668	0.109721	0.222231	0.145837	Fabp1/Apoa2/Apoa1/G0s2/Apoa5	5	REACTOME	up	NP
REACTOME_NICOTINATE_METABOLISM	REACTOME_NICOTINATE_METABOLISM	REACTOME_NICOTINATE_METABOLISM	2/129	21/4668	0.113181	0.228272	0.149802	Cyp8b1/Cd38	2	REACTOME	up	NP
REACTOME_DECTIN_1_MEDIATED_NONCANONICAL_NF_KB_SIGNALING	REACTOME_DECTIN_1_MEDIATED_NONCANONICAL_NF_KB_SIGNALING	REACTOME_DECTIN_1_MEDIATED_NONCANONICAL_NF_KB_SIGNALING	3/129	43/4668	0.114668	0.2303	0.151132	Ubb/Ubc/Rps27a	3	REACTOME	up	NP
REACTOME_DEFECTIVE_CFTR_CAUSES_CYSTIC_FIBROSIS	REACTOME_DEFECTIVE_CFTR_CAUSES_CYSTIC_FIBROSIS	REACTOME_DEFECTIVE_CFTR_CAUSES_CYSTIC_FIBROSIS	3/129	44/4668	0.1207	0.237427	0.15581	Ubb/Ubc/Rps27a	3	REACTOME	up	NP
REACTOME_DEGRADATION_OF_GLI1_BY_THE_PROTEASOME	REACTOME_DEGRADATION_OF_GLI1_BY_THE_PROTEASOME	REACTOME_DEGRADATION_OF_GLI1_BY_THE_PROTEASOME	3/129	44/4668	0.1207	0.237427	0.15581	Ubb/Ubc/Rps27a	3	REACTOME	up	NP
REACTOME_G1_S_DNA_DAMAGE_CHECKPOINTS	REACTOME_G1_S_DNA_DAMAGE_CHECKPOINTS	REACTOME_G1_S_DNA_DAMAGE_CHECKPOINTS	3/129	44/4668	0.1207	0.237427	0.15581	Ubb/Ubc/Rps27a	3	REACTOME	up	NP
REACTOME_HEDGEHOG_LIGAND_BIOGENESIS	REACTOME_HEDGEHOG_LIGAND_BIOGENESIS	REACTOME_HEDGEHOG_LIGAND_BIOGENESIS	3/129	44/4668	0.1207	0.237427	0.15581	Ubb/Ubc/Rps27a	3	REACTOME	up	NP
REACTOME_PHASE_II_CONJUGATION_OF_COMPOUNDS	REACTOME_PHASE_II_CONJUGATION_OF_COMPOUNDS	REACTOME_PHASE_II_CONJUGATION_OF_COMPOUNDS	3/129	44/4668	0.1207	0.237427	0.15581	Mgst1/Gsta3/Mat1a	3	REACTOME	up	NP
REACTOME_DETOXIFICATION_OF_REACTIVE_OXYGEN_SPECIES	REACTOME_DETOXIFICATION_OF_REACTIVE_OXYGEN_SPECIES	REACTOME_DETOXIFICATION_OF_REACTIVE_OXYGEN_SPECIES	2/129	22/4668	0.122336	0.238751	0.156679	Cat/Gpx1	2	REACTOME	up	NP
REACTOME_ION_CHANNEL_TRANSPORT	REACTOME_ION_CHANNEL_TRANSPORT	REACTOME_ION_CHANNEL_TRANSPORT	4/129	69/4668	0.122372	0.238751	0.156679	Ubb/Tsc22d3/Ubc/Rps27a	4	REACTOME	up	NP
REACTOME_TRANSCRIPTIONAL_REGULATION_BY_TP53	REACTOME_TRANSCRIPTIONAL_REGULATION_BY_TP53	REACTOME_TRANSCRIPTIONAL_REGULATION_BY_TP53	9/129	210/4668	0.12521	0.243294	0.15966	Ubb/Ubc/Ndufa4/Cox8a/Cox7c/Pten/Rps27a/mt-Co2/Btg2	9	REACTOME	up	NP
REACTOME_HOMOLOGY_DIRECTED_REPAIR	REACTOME_HOMOLOGY_DIRECTED_REPAIR	REACTOME_HOMOLOGY_DIRECTED_REPAIR	3/129	46/4668	0.133106	0.255231	0.167494	Ubb/Ubc/Rps27a	3	REACTOME	up	NP
REACTOME_OXIDATIVE_STRESS_INDUCED_SENESCENCE	REACTOME_OXIDATIVE_STRESS_INDUCED_SENESCENCE	REACTOME_OXIDATIVE_STRESS_INDUCED_SENESCENCE	3/129	46/4668	0.133106	0.255231	0.167494	Ubb/Ubc/Rps27a	3	REACTOME	up	NP
REACTOME_REGULATION_OF_TP53_ACTIVITY_THROUGH_PHOSPHORYLATION	REACTOME_REGULATION_OF_TP53_ACTIVITY_THROUGH_PHOSPHORYLATION	REACTOME_REGULATION_OF_TP53_ACTIVITY_THROUGH_PHOSPHORYLATION	3/129	46/4668	0.133106	0.255231	0.167494	Ubb/Ubc/Rps27a	3	REACTOME	up	NP
REACTOME_AUTOPHAGY	REACTOME_AUTOPHAGY	REACTOME_AUTOPHAGY	5/129	98/4668	0.133489	0.255231	0.167494	Ubb/Eef1a1/Ubc/Rps27a/Hsp90ab1	5	REACTOME	up	NP
REACTOME_REGULATION_OF_HMOX1_EXPRESSION_AND_ACTIVITY	REACTOME_REGULATION_OF_HMOX1_EXPRESSION_AND_ACTIVITY	REACTOME_REGULATION_OF_HMOX1_EXPRESSION_AND_ACTIVITY	3/129	47/4668	0.13947	0.265605	0.174301	Ubb/Ubc/Rps27a	3	REACTOME	up	NP
REACTOME_REGULATION_OF_RAS_BY_GAPS	REACTOME_REGULATION_OF_RAS_BY_GAPS	REACTOME_REGULATION_OF_RAS_BY_GAPS	3/129	48/4668	0.145936	0.276178	0.18124	Ubb/Ubc/Rps27a	3	REACTOME	up	NP
REACTOME_DISORDERS_OF_TRANSMEMBRANE_TRANSPORTERS	REACTOME_DISORDERS_OF_TRANSMEMBRANE_TRANSPORTERS	REACTOME_DISORDERS_OF_TRANSMEMBRANE_TRANSPORTERS	5/129	101/4668	0.146178	0.276178	0.18124	Apoa1/Ubb/Slc3a2/Ubc/Rps27a	5	REACTOME	up	NP
REACTOME_CARGO_CONCENTRATION_IN_THE_ER	REACTOME_CARGO_CONCENTRATION_IN_THE_ER	REACTOME_CARGO_CONCENTRATION_IN_THE_ER	2/129	25/4668	0.150779	0.28375	0.186209	Serpina1b/Serpina1e	2	REACTOME	up	NP
REACTOME_SIGNALING_BY_NOTCH1	REACTOME_SIGNALING_BY_NOTCH1	REACTOME_SIGNALING_BY_NOTCH1	3/129	49/4668	0.152499	0.285861	0.187594	Ubb/Ubc/Rps27a	3	REACTOME	up	NP
REACTOME_CELL_DEATH_SIGNALLING_VIA_NRAGE_NRIF_AND_NADE	REACTOME_CELL_DEATH_SIGNALLING_VIA_NRAGE_NRIF_AND_NADE	REACTOME_CELL_DEATH_SIGNALLING_VIA_NRAGE_NRIF_AND_NADE	3/129	50/4668	0.159155	0.294868	0.193505	Ubb/Ubc/Rps27a	3	REACTOME	up	NP
REACTOME_RUNX1_REGULATES_TRANSCRIPTION_OF_GENES_INVOLVED_IN_DIFFERENTIATION_OF_HSCS	REACTOME_RUNX1_REGULATES_TRANSCRIPTION_OF_GENES_INVOLVED_IN_DIFFERENTIATION_OF_HSCS	REACTOME_RUNX1_REGULATES_TRANSCRIPTION_OF_GENES_INVOLVED_IN_DIFFERENTIATION_OF_HSCS	3/129	50/4668	0.159155	0.294868	0.193505	Ubb/Ubc/Rps27a	3	REACTOME	up	NP
REACTOME_SELECTIVE_AUTOPHAGY	REACTOME_SELECTIVE_AUTOPHAGY	REACTOME_SELECTIVE_AUTOPHAGY	3/129	50/4668	0.159155	0.294868	0.193505	Ubb/Ubc/Rps27a	3	REACTOME	up	NP
REACTOME_MITOTIC_G1_PHASE_AND_G1_S_TRANSITION	REACTOME_MITOTIC_G1_PHASE_AND_G1_S_TRANSITION	REACTOME_MITOTIC_G1_PHASE_AND_G1_S_TRANSITION	4/129	77/4668	0.162847	0.298242	0.195719	Ubb/Ubc/Ccnd3/Rps27a	4	REACTOME	up	NP
REACTOME_SIGNALING_BY_THE_B_CELL_RECEPTOR_BCR	REACTOME_SIGNALING_BY_THE_B_CELL_RECEPTOR_BCR	REACTOME_SIGNALING_BY_THE_B_CELL_RECEPTOR_BCR	4/129	77/4668	0.162847	0.298242	0.195719	Ubb/Ubc/Rps27a/Ppia	4	REACTOME	up	NP
REACTOME_TCR_SIGNALING	REACTOME_TCR_SIGNALING	REACTOME_TCR_SIGNALING	4/129	77/4668	0.162847	0.298242	0.195719	Ubb/Ubc/Pten/Rps27a	4	REACTOME	up	NP
REACTOME_GLOBAL_GENOME_NUCLEOTIDE_EXCISION_REPAIR_GG_NER	REACTOME_GLOBAL_GENOME_NUCLEOTIDE_EXCISION_REPAIR_GG_NER	REACTOME_GLOBAL_GENOME_NUCLEOTIDE_EXCISION_REPAIR_GG_NER	3/129	51/4668	0.165898	0.300377	0.19712	Ubb/Ubc/Rps27a	3	REACTOME	up	NP
REACTOME_SIGNALING_BY_BRAF_AND_RAF1_FUSIONS	REACTOME_SIGNALING_BY_BRAF_AND_RAF1_FUSIONS	REACTOME_SIGNALING_BY_BRAF_AND_RAF1_FUSIONS	3/129	51/4668	0.165898	0.300377	0.19712	Fgb/Fgg/Fga	3	REACTOME	up	NP
REACTOME_TNFR2_NON_CANONICAL_NF_KB_PATHWAY	REACTOME_TNFR2_NON_CANONICAL_NF_KB_PATHWAY	REACTOME_TNFR2_NON_CANONICAL_NF_KB_PATHWAY	3/129	51/4668	0.165898	0.300377	0.19712	Ubb/Ubc/Rps27a	3	REACTOME	up	NP
REACTOME_APC_C_CDH1_MEDIATED_DEGRADATION_OF_CDC20_AND_OTHER_APC_C_CDH1_TARGETED_PROTEINS_IN_LATE_MITOSIS_EARLY_G1	REACTOME_APC_C_CDH1_MEDIATED_DEGRADATION_OF_CDC20_AND_OTHER_APC_C_CDH1_TARGETED_PROTEINS_IN_LATE_MITOSIS_EARLY_G1	REACTOME_APC_C_CDH1_MEDIATED_DEGRADATION_OF_CDC20_AND_OTHER_APC_C_CDH1_TARGETED_PROTEINS_IN_LATE_MITOSIS_EARLY_G1	3/129	52/4668	0.172726	0.309225	0.202927	Ubb/Ubc/Rps27a	3	REACTOME	up	NP
REACTOME_DNA_REPLICATION_PRE_INITIATION	REACTOME_DNA_REPLICATION_PRE_INITIATION	REACTOME_DNA_REPLICATION_PRE_INITIATION	3/129	52/4668	0.172726	0.309225	0.202927	Ubb/Ubc/Rps27a	3	REACTOME	up	NP
REACTOME_REGULATION_OF_PLK1_ACTIVITY_AT_G2_M_TRANSITION	REACTOME_REGULATION_OF_PLK1_ACTIVITY_AT_G2_M_TRANSITION	REACTOME_REGULATION_OF_PLK1_ACTIVITY_AT_G2_M_TRANSITION	3/129	52/4668	0.172726	0.309225	0.202927	Ubb/Ubc/Rps27a	3	REACTOME	up	NP
REACTOME_TRANSCRIPTIONAL_REGULATION_BY_RUNX2	REACTOME_TRANSCRIPTIONAL_REGULATION_BY_RUNX2	REACTOME_TRANSCRIPTIONAL_REGULATION_BY_RUNX2	4/129	79/4668	0.173654	0.309727	0.203256	Maf/Ubb/Ubc/Rps27a	4	REACTOME	up	NP
REACTOME_ANTIVIRAL_MECHANISM_BY_IFN_STIMULATED_GENES	REACTOME_ANTIVIRAL_MECHANISM_BY_IFN_STIMULATED_GENES	REACTOME_ANTIVIRAL_MECHANISM_BY_IFN_STIMULATED_GENES	3/129	53/4668	0.179633	0.315678	0.207161	Ubb/Ubc/Rps27a	3	REACTOME	up	NP
REACTOME_CYCLIN_A_CDK2_ASSOCIATED_EVENTS_AT_S_PHASE_ENTRY	REACTOME_CYCLIN_A_CDK2_ASSOCIATED_EVENTS_AT_S_PHASE_ENTRY	REACTOME_CYCLIN_A_CDK2_ASSOCIATED_EVENTS_AT_S_PHASE_ENTRY	3/129	53/4668	0.179633	0.315678	0.207161	Ubb/Ubc/Rps27a	3	REACTOME	up	NP
REACTOME_HEDGEHOG_ON_STATE	REACTOME_HEDGEHOG_ON_STATE	REACTOME_HEDGEHOG_ON_STATE	3/129	53/4668	0.179633	0.315678	0.207161	Ubb/Ubc/Rps27a	3	REACTOME	up	NP
REACTOME_REGULATION_OF_RUNX2_EXPRESSION_AND_ACTIVITY	REACTOME_REGULATION_OF_RUNX2_EXPRESSION_AND_ACTIVITY	REACTOME_REGULATION_OF_RUNX2_EXPRESSION_AND_ACTIVITY	3/129	53/4668	0.179633	0.315678	0.207161	Ubb/Ubc/Rps27a	3	REACTOME	up	NP
REACTOME_CELLULAR_RESPONSE_TO_HYPOXIA	REACTOME_CELLULAR_RESPONSE_TO_HYPOXIA	REACTOME_CELLULAR_RESPONSE_TO_HYPOXIA	3/129	54/4668	0.186614	0.326746	0.214425	Ubb/Ubc/Rps27a	3	REACTOME	up	NP
REACTOME_NUCLEAR_EVENTS_KINASE_AND_TRANSCRIPTION_FACTOR_ACTIVATION	REACTOME_NUCLEAR_EVENTS_KINASE_AND_TRANSCRIPTION_FACTOR_ACTIVATION	REACTOME_NUCLEAR_EVENTS_KINASE_AND_TRANSCRIPTION_FACTOR_ACTIVATION	2/129	29/4668	0.190421	0.332195	0.218	Id3/Mef2a	2	REACTOME	up	NP
REACTOME_HSP90_CHAPERONE_CYCLE_FOR_STEROID_HORMONE_RECEPTORS_SHR_IN_THE_PRESENCE_OF_LIGAND	REACTOME_HSP90_CHAPERONE_CYCLE_FOR_STEROID_HORMONE_RECEPTORS_SHR_IN_THE_PRESENCE_OF_LIGAND	REACTOME_HSP90_CHAPERONE_CYCLE_FOR_STEROID_HORMONE_RECEPTORS_SHR_IN_THE_PRESENCE_OF_LIGAND	2/129	30/4668	0.200548	0.34648	0.227375	Fkbp5/Hsp90ab1	2	REACTOME	up	NP
REACTOME_APC_C_MEDIATED_DEGRADATION_OF_CELL_CYCLE_PROTEINS	REACTOME_APC_C_MEDIATED_DEGRADATION_OF_CELL_CYCLE_PROTEINS	REACTOME_APC_C_MEDIATED_DEGRADATION_OF_CELL_CYCLE_PROTEINS	3/129	56/4668	0.200785	0.34648	0.227375	Ubb/Ubc/Rps27a	3	REACTOME	up	NP
REACTOME_SWITCHING_OF_ORIGINS_TO_A_POST_REPLICATIVE_STATE	REACTOME_SWITCHING_OF_ORIGINS_TO_A_POST_REPLICATIVE_STATE	REACTOME_SWITCHING_OF_ORIGINS_TO_A_POST_REPLICATIVE_STATE	3/129	56/4668	0.200785	0.34648	0.227375	Ubb/Ubc/Rps27a	3	REACTOME	up	NP
REACTOME_SARS_COV_INFECTIONS	REACTOME_SARS_COV_INFECTIONS	REACTOME_SARS_COV_INFECTIONS	5/129	113/4668	0.201628	0.346684	0.227509	Ubb/Ctsl/Ubc/Rps27a/Hsp90ab1	5	REACTOME	up	NP
REACTOME_CELLULAR_SENESCENCE	REACTOME_CELLULAR_SENESCENCE	REACTOME_CELLULAR_SENESCENCE	4/129	85/4668	0.207463	0.353763	0.232154	Ubb/Ubc/Cebpb/Rps27a	4	REACTOME	up	NP
REACTOME_SIGNALING_BY_MET	REACTOME_SIGNALING_BY_MET	REACTOME_SIGNALING_BY_MET	3/129	57/4668	0.207965	0.353763	0.232154	Ubb/Ubc/Rps27a	3	REACTOME	up	NP
REACTOME_SIGNALING_BY_TGF_BETA_RECEPTOR_COMPLEX	REACTOME_SIGNALING_BY_TGF_BETA_RECEPTOR_COMPLEX	REACTOME_SIGNALING_BY_TGF_BETA_RECEPTOR_COMPLEX	3/129	57/4668	0.207965	0.353763	0.232154	Ubb/Ubc/Rps27a	3	REACTOME	up	NP
REACTOME_INTERFERON_ALPHA_BETA_SIGNALING	REACTOME_INTERFERON_ALPHA_BETA_SIGNALING	REACTOME_INTERFERON_ALPHA_BETA_SIGNALING	2/129	31/4668	0.210737	0.356729	0.234101	H2-D1/H2-Q10	2	REACTOME	up	NP
REACTOME_SIGNALING_BY_NUCLEAR_RECEPTORS	REACTOME_SIGNALING_BY_NUCLEAR_RECEPTORS	REACTOME_SIGNALING_BY_NUCLEAR_RECEPTORS	6/129	145/4668	0.211201	0.356729	0.234101	Apoe/Scd1/Fkbp5/Apoc1/Apoc4/Hsp90ab1	6	REACTOME	up	NP
REACTOME_PCP_CE_PATHWAY	REACTOME_PCP_CE_PATHWAY	REACTOME_PCP_CE_PATHWAY	3/129	58/4668	0.215203	0.362208	0.237697	Ubb/Ubc/Rps27a	3	REACTOME	up	NP
REACTOME_DEGRADATION_OF_BETA_CATENIN_BY_THE_DESTRUCTION_COMPLEX	REACTOME_DEGRADATION_OF_BETA_CATENIN_BY_THE_DESTRUCTION_COMPLEX	REACTOME_DEGRADATION_OF_BETA_CATENIN_BY_THE_DESTRUCTION_COMPLEX	3/129	59/4668	0.222495	0.371862	0.244032	Ubb/Ubc/Rps27a	3	REACTOME	up	NP
REACTOME_FCERI_MEDIATED_NF_KB_ACTIVATION	REACTOME_FCERI_MEDIATED_NF_KB_ACTIVATION	REACTOME_FCERI_MEDIATED_NF_KB_ACTIVATION	3/129	59/4668	0.222495	0.371862	0.244032	Ubb/Ubc/Rps27a	3	REACTOME	up	NP
REACTOME_HIV_INFECTION	REACTOME_HIV_INFECTION	REACTOME_HIV_INFECTION	6/129	149/4668	0.229076	0.380144	0.249467	Ubb/B2m/Ubc/H2-Q10/Rps27a/Ppia	6	REACTOME	up	NP
REACTOME_CIRCADIAN_CLOCK	REACTOME_CIRCADIAN_CLOCK	REACTOME_CIRCADIAN_CLOCK	3/129	60/4668	0.229836	0.380144	0.249467	Ubb/Ubc/Rps27a	3	REACTOME	up	NP
REACTOME_SIGNALING_BY_NOTCH4	REACTOME_SIGNALING_BY_NOTCH4	REACTOME_SIGNALING_BY_NOTCH4	3/129	60/4668	0.229836	0.380144	0.249467	Ubb/Ubc/Rps27a	3	REACTOME	up	NP
REACTOME_TRANSCRIPTIONAL_REGULATION_BY_RUNX1	REACTOME_TRANSCRIPTIONAL_REGULATION_BY_RUNX1	REACTOME_TRANSCRIPTIONAL_REGULATION_BY_RUNX1	5/129	119/4668	0.231717	0.381933	0.250641	Ubb/Ctsl/Ubc/Ccnd3/Rps27a	5	REACTOME	up	NP
REACTOME_ONCOGENIC_MAPK_SIGNALING	REACTOME_ONCOGENIC_MAPK_SIGNALING	REACTOME_ONCOGENIC_MAPK_SIGNALING	3/129	61/4668	0.237223	0.385951	0.253278	Fgb/Fgg/Fga	3	REACTOME	up	NP
REACTOME_UCH_PROTEINASES	REACTOME_UCH_PROTEINASES	REACTOME_UCH_PROTEINASES	3/129	61/4668	0.237223	0.385951	0.253278	Ubb/Ubc/Rps27a	3	REACTOME	up	NP
REACTOME_RRNA_MODIFICATION_IN_THE_NUCLEUS_AND_CYTOSOL	REACTOME_RRNA_MODIFICATION_IN_THE_NUCLEUS_AND_CYTOSOL	REACTOME_RRNA_MODIFICATION_IN_THE_NUCLEUS_AND_CYTOSOL	2/129	34/4668	0.241571	0.385951	0.253278	Rps14/Rps7	2	REACTOME	up	NP
REACTOME_HIV_LIFE_CYCLE	REACTOME_HIV_LIFE_CYCLE	REACTOME_HIV_LIFE_CYCLE	4/129	91/4668	0.242998	0.385951	0.253278	Ubb/Ubc/Rps27a/Ppia	4	REACTOME	up	NP
REACTOME_ALPHA_LINOLENIC_OMEGA3_AND_LINOLEIC_OMEGA6_ACID_METABOLISM	REACTOME_ALPHA_LINOLENIC_OMEGA3_AND_LINOLEIC_OMEGA6_ACID_METABOLISM	REACTOME_ALPHA_LINOLENIC_OMEGA3_AND_LINOLEIC_OMEGA6_ACID_METABOLISM	1/129	4668-10-01	0.244605	0.385951	0.253278	Scp2	1	REACTOME	up	NP
REACTOME_ATF6_ATF6_ALPHA_ACTIVATES_CHAPERONE_GENES	REACTOME_ATF6_ATF6_ALPHA_ACTIVATES_CHAPERONE_GENES	REACTOME_ATF6_ATF6_ALPHA_ACTIVATES_CHAPERONE_GENES	1/129	4668-10-01	0.244605	0.385951	0.253278	Hspa5	1	REACTOME	up	NP
REACTOME_GAMMA_CARBOXYLATION_TRANSPORT_AND_AMINO_TERMINAL_CLEAVAGE_OF_PROTEINS	REACTOME_GAMMA_CARBOXYLATION_TRANSPORT_AND_AMINO_TERMINAL_CLEAVAGE_OF_PROTEINS	REACTOME_GAMMA_CARBOXYLATION_TRANSPORT_AND_AMINO_TERMINAL_CLEAVAGE_OF_PROTEINS	1/129	4668-10-01	0.244605	0.385951	0.253278	F2	1	REACTOME	up	NP
REACTOME_HEME_BIOSYNTHESIS	REACTOME_HEME_BIOSYNTHESIS	REACTOME_HEME_BIOSYNTHESIS	1/129	4668-10-01	0.244605	0.385951	0.253278	Alb	1	REACTOME	up	NP
REACTOME_INWARDLY_RECTIFYING_K_CHANNELS	REACTOME_INWARDLY_RECTIFYING_K_CHANNELS	REACTOME_INWARDLY_RECTIFYING_K_CHANNELS	1/129	4668-10-01	0.244605	0.385951	0.253278	Kcnj16	1	REACTOME	up	NP
REACTOME_MECP2_REGULATES_NEURONAL_RECEPTORS_AND_CHANNELS	REACTOME_MECP2_REGULATES_NEURONAL_RECEPTORS_AND_CHANNELS	REACTOME_MECP2_REGULATES_NEURONAL_RECEPTORS_AND_CHANNELS	1/129	4668-10-01	0.244605	0.385951	0.253278	Fkbp5	1	REACTOME	up	NP
REACTOME_METHYLATION	REACTOME_METHYLATION	REACTOME_METHYLATION	1/129	4668-10-01	0.244605	0.385951	0.253278	Mat1a	1	REACTOME	up	NP
REACTOME_RESPONSE_OF_EIF2AK1_HRI_TO_HEME_DEFICIENCY	REACTOME_RESPONSE_OF_EIF2AK1_HRI_TO_HEME_DEFICIENCY	REACTOME_RESPONSE_OF_EIF2AK1_HRI_TO_HEME_DEFICIENCY	1/129	4668-10-01	0.244605	0.385951	0.253278	Cebpb	1	REACTOME	up	NP
REACTOME_CELL_SURFACE_INTERACTIONS_AT_THE_VASCULAR_WALL	REACTOME_CELL_SURFACE_INTERACTIONS_AT_THE_VASCULAR_WALL	REACTOME_CELL_SURFACE_INTERACTIONS_AT_THE_VASCULAR_WALL	3/129	62/4668	0.244651	0.385951	0.253278	Slc3a2/F2/Ppia	3	REACTOME	up	NP
REACTOME_HEDGEHOG_OFF_STATE	REACTOME_HEDGEHOG_OFF_STATE	REACTOME_HEDGEHOG_OFF_STATE	3/129	63/4668	0.252117	0.39383	0.258448	Ubb/Ubc/Rps27a	3	REACTOME	up	NP
REACTOME_NUCLEOTIDE_EXCISION_REPAIR	REACTOME_NUCLEOTIDE_EXCISION_REPAIR	REACTOME_NUCLEOTIDE_EXCISION_REPAIR	3/129	63/4668	0.252117	0.39383	0.258448	Ubb/Ubc/Rps27a	3	REACTOME	up	NP
REACTOME_P75_NTR_RECEPTOR_MEDIATED_SIGNALLING	REACTOME_P75_NTR_RECEPTOR_MEDIATED_SIGNALLING	REACTOME_P75_NTR_RECEPTOR_MEDIATED_SIGNALLING	3/129	63/4668	0.252117	0.39383	0.258448	Ubb/Ubc/Rps27a	3	REACTOME	up	NP
REACTOME_DNA_DOUBLE_STRAND_BREAK_REPAIR	REACTOME_DNA_DOUBLE_STRAND_BREAK_REPAIR	REACTOME_DNA_DOUBLE_STRAND_BREAK_REPAIR	3/129	64/4668	0.259616	0.401607	0.263552	Ubb/Ubc/Rps27a	3	REACTOME	up	NP
REACTOME_SYNTHESIS_OF_DNA	REACTOME_SYNTHESIS_OF_DNA	REACTOME_SYNTHESIS_OF_DNA	3/129	64/4668	0.259616	0.401607	0.263552	Ubb/Ubc/Rps27a	3	REACTOME	up	NP
REACTOME_UNFOLDED_PROTEIN_RESPONSE_UPR	REACTOME_UNFOLDED_PROTEIN_RESPONSE_UPR	REACTOME_UNFOLDED_PROTEIN_RESPONSE_UPR	3/129	64/4668	0.259616	0.401607	0.263552	Hspa5/Cebpb/Herpud1	3	REACTOME	up	NP
REACTOME_DEFECTS_OF_CONTACT_ACTIVATION_SYSTEM_CAS_AND_KALLIKREIN_KININ_SYSTEM_KKS	REACTOME_DEFECTS_OF_CONTACT_ACTIVATION_SYSTEM_CAS_AND_KALLIKREIN_KININ_SYSTEM_KKS	REACTOME_DEFECTS_OF_CONTACT_ACTIVATION_SYSTEM_CAS_AND_KALLIKREIN_KININ_SYSTEM_KKS	1/129	4668-11-01	0.265525	0.406798	0.266958	F2	1	REACTOME	up	NP
REACTOME_METABOLISM_OF_STEROID_HORMONES	REACTOME_METABOLISM_OF_STEROID_HORMONES	REACTOME_METABOLISM_OF_STEROID_HORMONES	1/129	4668-11-01	0.265525	0.406798	0.266958	Hsd11b1	1	REACTOME	up	NP
REACTOME_PROTEIN_METHYLATION	REACTOME_PROTEIN_METHYLATION	REACTOME_PROTEIN_METHYLATION	1/129	4668-11-01	0.265525	0.406798	0.266958	Eef1a1	1	REACTOME	up	NP
REACTOME_COMPLEX_I_BIOGENESIS	REACTOME_COMPLEX_I_BIOGENESIS	REACTOME_COMPLEX_I_BIOGENESIS	2/129	37/4668	0.272599	0.416301	0.273195	mt-Nd4/mt-Nd1	2	REACTOME	up	NP
REACTOME_CLATHRIN_MEDIATED_ENDOCYTOSIS	REACTOME_CLATHRIN_MEDIATED_ENDOCYTOSIS	REACTOME_CLATHRIN_MEDIATED_ENDOCYTOSIS	4/129	97/4668	0.279802	0.424668	0.278685	Trf/Ubb/Ubc/Rps27a	4	REACTOME	up	NP
REACTOME_ASPARAGINE_N_LINKED_GLYCOSYLATION	REACTOME_ASPARAGINE_N_LINKED_GLYCOSYLATION	REACTOME_ASPARAGINE_N_LINKED_GLYCOSYLATION	7/129	192/4668	0.279854	0.424668	0.278685	Serpina1b/Ubb/Serpina1e/Ubc/Rps27a/Cd55/Ank2	7	REACTOME	up	NP
REACTOME_ATF6_ATF6_ALPHA_ACTIVATES_CHAPERONES	REACTOME_ATF6_ATF6_ALPHA_ACTIVATES_CHAPERONES	REACTOME_ATF6_ATF6_ALPHA_ACTIVATES_CHAPERONES	1/129	4668-12-01	0.28587	0.428357	0.281106	Hspa5	1	REACTOME	up	NP
REACTOME_ERK_MAPK_TARGETS	REACTOME_ERK_MAPK_TARGETS	REACTOME_ERK_MAPK_TARGETS	1/129	4668-12-01	0.28587	0.428357	0.281106	Mef2a	1	REACTOME	up	NP
REACTOME_MISCELLANEOUS_TRANSPORT_AND_BINDING_EVENTS	REACTOME_MISCELLANEOUS_TRANSPORT_AND_BINDING_EVENTS	REACTOME_MISCELLANEOUS_TRANSPORT_AND_BINDING_EVENTS	1/129	4668-12-01	0.28587	0.428357	0.281106	Azgp1	1	REACTOME	up	NP
REACTOME_NICOTINAMIDE_SALVAGING	REACTOME_NICOTINAMIDE_SALVAGING	REACTOME_NICOTINAMIDE_SALVAGING	1/129	4668-12-01	0.28587	0.428357	0.281106	Cyp8b1	1	REACTOME	up	NP
REACTOME_SIGNALING_BY_TGFB_FAMILY_MEMBERS	REACTOME_SIGNALING_BY_TGFB_FAMILY_MEMBERS	REACTOME_SIGNALING_BY_TGFB_FAMILY_MEMBERS	3/129	68/4668	0.289879	0.433007	0.284158	Ubb/Ubc/Rps27a	3	REACTOME	up	NP
REACTOME_PTEN_REGULATION	REACTOME_PTEN_REGULATION	REACTOME_PTEN_REGULATION	4/129	101/4668	0.304824	0.450937	0.295924	Ubb/Ubc/Pten/Rps27a	4	REACTOME	up	NP
REACTOME_CLEC7A_DECTIN_1_SIGNALING	REACTOME_CLEC7A_DECTIN_1_SIGNALING	REACTOME_CLEC7A_DECTIN_1_SIGNALING	3/129	70/4668	0.30512	0.450937	0.295924	Ubb/Ubc/Rps27a	3	REACTOME	up	NP
REACTOME_RAF_INDEPENDENT_MAPK1_3_ACTIVATION	REACTOME_RAF_INDEPENDENT_MAPK1_3_ACTIVATION	REACTOME_RAF_INDEPENDENT_MAPK1_3_ACTIVATION	1/129	13/4668	0.305656	0.450937	0.295924	Dusp1	1	REACTOME	up	NP
REACTOME_RECYCLING_OF_BILE_ACIDS_AND_SALTS	REACTOME_RECYCLING_OF_BILE_ACIDS_AND_SALTS	REACTOME_RECYCLING_OF_BILE_ACIDS_AND_SALTS	1/129	13/4668	0.305656	0.450937	0.295924	Alb	1	REACTOME	up	NP
REACTOME_DNA_REPLICATION	REACTOME_DNA_REPLICATION	REACTOME_DNA_REPLICATION	3/129	71/4668	0.312755	0.459991	0.301866	Ubb/Ubc/Rps27a	3	REACTOME	up	NP
REACTOME_INTERLEUKIN_1_SIGNALING	REACTOME_INTERLEUKIN_1_SIGNALING	REACTOME_INTERLEUKIN_1_SIGNALING	3/129	72/4668	0.320397	0.467774	0.306974	Ubb/Ubc/Rps27a	3	REACTOME	up	NP
REACTOME_TRANSCRIPTIONAL_REGULATION_BY_RUNX3	REACTOME_TRANSCRIPTIONAL_REGULATION_BY_RUNX3	REACTOME_TRANSCRIPTIONAL_REGULATION_BY_RUNX3	3/129	72/4668	0.320397	0.467774	0.306974	Ubb/Ubc/Rps27a	3	REACTOME	up	NP
REACTOME_FORMATION_OF_ATP_BY_CHEMIOSMOTIC_COUPLING	REACTOME_FORMATION_OF_ATP_BY_CHEMIOSMOTIC_COUPLING	REACTOME_FORMATION_OF_ATP_BY_CHEMIOSMOTIC_COUPLING	1/129	14/4668	0.324898	0.467774	0.306974	mt-Atp6	1	REACTOME	up	NP
REACTOME_GABA_B_RECEPTOR_ACTIVATION	REACTOME_GABA_B_RECEPTOR_ACTIVATION	REACTOME_GABA_B_RECEPTOR_ACTIVATION	1/129	14/4668	0.324898	0.467774	0.306974	Kcnj16	1	REACTOME	up	NP
REACTOME_INTERLEUKIN_RECEPTOR_SHC_SIGNALING	REACTOME_INTERLEUKIN_RECEPTOR_SHC_SIGNALING	REACTOME_INTERLEUKIN_RECEPTOR_SHC_SIGNALING	1/129	14/4668	0.324898	0.467774	0.306974	Csf2ra	1	REACTOME	up	NP
REACTOME_NUCLEAR_EVENTS_STIMULATED_BY_ALK_SIGNALING_IN_CANCER	REACTOME_NUCLEAR_EVENTS_STIMULATED_BY_ALK_SIGNALING_IN_CANCER	REACTOME_NUCLEAR_EVENTS_STIMULATED_BY_ALK_SIGNALING_IN_CANCER	1/129	14/4668	0.324898	0.467774	0.306974	Cebpb	1	REACTOME	up	NP
REACTOME_REGULATION_OF_RUNX1_EXPRESSION_AND_ACTIVITY	REACTOME_REGULATION_OF_RUNX1_EXPRESSION_AND_ACTIVITY	REACTOME_REGULATION_OF_RUNX1_EXPRESSION_AND_ACTIVITY	1/129	14/4668	0.324898	0.467774	0.306974	Ccnd3	1	REACTOME	up	NP
REACTOME_TRANSPORT_OF_INORGANIC_CATIONS_ANIONS_AND_AMINO_ACIDS_OLIGOPEPTIDES	REACTOME_TRANSPORT_OF_INORGANIC_CATIONS_ANIONS_AND_AMINO_ACIDS_OLIGOPEPTIDES	REACTOME_TRANSPORT_OF_INORGANIC_CATIONS_ANIONS_AND_AMINO_ACIDS_OLIGOPEPTIDES	2/129	43/4668	0.334355	0.479945	0.31496	Slc38a4/Slc3a2	2	REACTOME	up	NP
REACTOME_G2_M_CHECKPOINTS	REACTOME_G2_M_CHECKPOINTS	REACTOME_G2_M_CHECKPOINTS	3/129	74/4668	0.335685	0.480412	0.315267	Ubb/Ubc/Rps27a	3	REACTOME	up	NP
REACTOME_ENDOGENOUS_STEROLS	REACTOME_ENDOGENOUS_STEROLS	REACTOME_ENDOGENOUS_STEROLS	1/129	15/4668	0.34361	0.484367	0.317863	Cyp8b1	1	REACTOME	up	NP
REACTOME_GABA_RECEPTOR_ACTIVATION	REACTOME_GABA_RECEPTOR_ACTIVATION	REACTOME_GABA_RECEPTOR_ACTIVATION	1/129	15/4668	0.34361	0.484367	0.317863	Kcnj16	1	REACTOME	up	NP
REACTOME_METABOLIC_DISORDERS_OF_BIOLOGICAL_OXIDATION_ENZYMES	REACTOME_METABOLIC_DISORDERS_OF_BIOLOGICAL_OXIDATION_ENZYMES	REACTOME_METABOLIC_DISORDERS_OF_BIOLOGICAL_OXIDATION_ENZYMES	1/129	15/4668	0.34361	0.484367	0.317863	Mat1a	1	REACTOME	up	NP
REACTOME_RUNX2_REGULATES_OSTEOBLAST_DIFFERENTIATION	REACTOME_RUNX2_REGULATES_OSTEOBLAST_DIFFERENTIATION	REACTOME_RUNX2_REGULATES_OSTEOBLAST_DIFFERENTIATION	1/129	15/4668	0.34361	0.484367	0.317863	Maf	1	REACTOME	up	NP
REACTOME_SYNTHESIS_OF_IP3_AND_IP4_IN_THE_CYTOSOL	REACTOME_SYNTHESIS_OF_IP3_AND_IP4_IN_THE_CYTOSOL	REACTOME_SYNTHESIS_OF_IP3_AND_IP4_IN_THE_CYTOSOL	1/129	15/4668	0.34361	0.484367	0.317863	Pten	1	REACTOME	up	NP
REACTOME_DEGRADATION_OF_THE_EXTRACELLULAR_MATRIX	REACTOME_DEGRADATION_OF_THE_EXTRACELLULAR_MATRIX	REACTOME_DEGRADATION_OF_THE_EXTRACELLULAR_MATRIX	2/129	44/4668	0.344529	0.484367	0.317863	Ctsl/Plg	2	REACTOME	up	NP
REACTOME_ER_TO_GOLGI_ANTEROGRADE_TRANSPORT	REACTOME_ER_TO_GOLGI_ANTEROGRADE_TRANSPORT	REACTOME_ER_TO_GOLGI_ANTEROGRADE_TRANSPORT	4/129	108/4668	0.349124	0.489388	0.321157	Serpina1b/Serpina1e/Cd55/Ank2	4	REACTOME	up	NP
REACTOME_GPCR_LIGAND_BINDING	REACTOME_GPCR_LIGAND_BINDING	REACTOME_GPCR_LIGAND_BINDING	2/129	45/4668	0.354654	0.495542	0.325196	F2/Cd55	2	REACTOME	up	NP
REACTOME_ASSEMBLY_OF_ACTIVE_LPL_AND_LIPC_LIPASE_COMPLEXES	REACTOME_ASSEMBLY_OF_ACTIVE_LPL_AND_LIPC_LIPASE_COMPLEXES	REACTOME_ASSEMBLY_OF_ACTIVE_LPL_AND_LIPC_LIPASE_COMPLEXES	1/129	16/4668	0.361808	0.495542	0.325196	Apoa5	1	REACTOME	up	NP
REACTOME_CLASS_B_2_SECRETIN_FAMILY_RECEPTORS	REACTOME_CLASS_B_2_SECRETIN_FAMILY_RECEPTORS	REACTOME_CLASS_B_2_SECRETIN_FAMILY_RECEPTORS	1/129	16/4668	0.361808	0.495542	0.325196	Cd55	1	REACTOME	up	NP
REACTOME_GAP_JUNCTION_TRAFFICKING_AND_REGULATION	REACTOME_GAP_JUNCTION_TRAFFICKING_AND_REGULATION	REACTOME_GAP_JUNCTION_TRAFFICKING_AND_REGULATION	1/129	16/4668	0.361808	0.495542	0.325196	Gjb2	1	REACTOME	up	NP
REACTOME_NGF_STIMULATED_TRANSCRIPTION	REACTOME_NGF_STIMULATED_TRANSCRIPTION	REACTOME_NGF_STIMULATED_TRANSCRIPTION	1/129	16/4668	0.361808	0.495542	0.325196	Id3	1	REACTOME	up	NP
REACTOME_THROMBIN_SIGNALLING_THROUGH_PROTEINASE_ACTIVATED_RECEPTORS_PARS	REACTOME_THROMBIN_SIGNALLING_THROUGH_PROTEINASE_ACTIVATED_RECEPTORS_PARS	REACTOME_THROMBIN_SIGNALLING_THROUGH_PROTEINASE_ACTIVATED_RECEPTORS_PARS	1/129	16/4668	0.361808	0.495542	0.325196	F2	1	REACTOME	up	NP
REACTOME_TP53_REGULATES_TRANSCRIPTION_OF_ADDITIONAL_CELL_CYCLE_GENES_WHOSE_EXACT_ROLE_IN_THE_P53_PATHWAY_REMAIN_UNCERTAIN	REACTOME_TP53_REGULATES_TRANSCRIPTION_OF_ADDITIONAL_CELL_CYCLE_GENES_WHOSE_EXACT_ROLE_IN_THE_P53_PATHWAY_REMAIN_UNCERTAIN	REACTOME_TP53_REGULATES_TRANSCRIPTION_OF_ADDITIONAL_CELL_CYCLE_GENES_WHOSE_EXACT_ROLE_IN_THE_P53_PATHWAY_REMAIN_UNCERTAIN	1/129	16/4668	0.361808	0.495542	0.325196	Btg2	1	REACTOME	up	NP
REACTOME_TRIGLYCERIDE_METABOLISM	REACTOME_TRIGLYCERIDE_METABOLISM	REACTOME_TRIGLYCERIDE_METABOLISM	1/129	16/4668	0.361808	0.495542	0.325196	Fabp1	1	REACTOME	up	NP
REACTOME_FOXO_MEDIATED_TRANSCRIPTION	REACTOME_FOXO_MEDIATED_TRANSCRIPTION	REACTOME_FOXO_MEDIATED_TRANSCRIPTION	2/129	46/4668	0.364724	0.498109	0.32688	Cat/Txnip	2	REACTOME	up	NP
REACTOME_POTASSIUM_CHANNELS	REACTOME_POTASSIUM_CHANNELS	REACTOME_POTASSIUM_CHANNELS	1/129	17/4668	0.379505	0.515351	0.338195	Kcnj16	1	REACTOME	up	NP
REACTOME_UPTAKE_AND_ACTIONS_OF_BACTERIAL_TOXINS	REACTOME_UPTAKE_AND_ACTIONS_OF_BACTERIAL_TOXINS	REACTOME_UPTAKE_AND_ACTIONS_OF_BACTERIAL_TOXINS	1/129	17/4668	0.379505	0.515351	0.338195	Hsp90ab1	1	REACTOME	up	NP
REACTOME_MITOTIC_G2_G2_M_PHASES	REACTOME_MITOTIC_G2_G2_M_PHASES	REACTOME_MITOTIC_G2_G2_M_PHASES	4/129	113/4668	0.380875	0.515746	0.338455	Ubb/Ubc/Rps27a/Hsp90ab1	4	REACTOME	up	NP
REACTOME_REGULATION_OF_HSF1_MEDIATED_HEAT_SHOCK_RESPONSE	REACTOME_REGULATION_OF_HSF1_MEDIATED_HEAT_SHOCK_RESPONSE	REACTOME_REGULATION_OF_HSF1_MEDIATED_HEAT_SHOCK_RESPONSE	2/129	48/4668	0.384683	0.516702	0.339082	Ubb/Hspa5	2	REACTOME	up	NP
REACTOME_SIGNALING_BY_HEDGEHOG	REACTOME_SIGNALING_BY_HEDGEHOG	REACTOME_SIGNALING_BY_HEDGEHOG	3/129	81/4668	0.388952	0.516702	0.339082	Ubb/Ubc/Rps27a	3	REACTOME	up	NP
REACTOME_UB_SPECIFIC_PROCESSING_PROTEASES	REACTOME_UB_SPECIFIC_PROCESSING_PROTEASES	REACTOME_UB_SPECIFIC_PROCESSING_PROTEASES	4/129	115/4668	0.393546	0.516702	0.339082	Ubb/Ubc/Pten/Rps27a	4	REACTOME	up	NP
REACTOME_C_TYPE_LECTIN_RECEPTORS_CLRS	REACTOME_C_TYPE_LECTIN_RECEPTORS_CLRS	REACTOME_C_TYPE_LECTIN_RECEPTORS_CLRS	3/129	82/4668	0.396495	0.516702	0.339082	Ubb/Ubc/Rps27a	3	REACTOME	up	NP
REACTOME_ADHERENS_JUNCTIONS_INTERACTIONS	REACTOME_ADHERENS_JUNCTIONS_INTERACTIONS	REACTOME_ADHERENS_JUNCTIONS_INTERACTIONS	1/129	18/4668	0.396715	0.516702	0.339082	Ctnnd1	1	REACTOME	up	NP
REACTOME_ASSEMBLY_OF_COLLAGEN_FIBRILS_AND_OTHER_MULTIMERIC_STRUCTURES	REACTOME_ASSEMBLY_OF_COLLAGEN_FIBRILS_AND_OTHER_MULTIMERIC_STRUCTURES	REACTOME_ASSEMBLY_OF_COLLAGEN_FIBRILS_AND_OTHER_MULTIMERIC_STRUCTURES	1/129	18/4668	0.396715	0.516702	0.339082	Ctsl	1	REACTOME	up	NP
REACTOME_DAP12_SIGNALING	REACTOME_DAP12_SIGNALING	REACTOME_DAP12_SIGNALING	1/129	18/4668	0.396715	0.516702	0.339082	B2m	1	REACTOME	up	NP
REACTOME_GLUCONEOGENESIS	REACTOME_GLUCONEOGENESIS	REACTOME_GLUCONEOGENESIS	1/129	18/4668	0.396715	0.516702	0.339082	Aldob	1	REACTOME	up	NP
REACTOME_MYOGENESIS	REACTOME_MYOGENESIS	REACTOME_MYOGENESIS	1/129	18/4668	0.396715	0.516702	0.339082	Mef2a	1	REACTOME	up	NP
REACTOME_NUCLEAR_SIGNALING_BY_ERBB4	REACTOME_NUCLEAR_SIGNALING_BY_ERBB4	REACTOME_NUCLEAR_SIGNALING_BY_ERBB4	1/129	18/4668	0.396715	0.516702	0.339082	Apoe	1	REACTOME	up	NP
REACTOME_PEPTIDE_LIGAND_BINDING_RECEPTORS	REACTOME_PEPTIDE_LIGAND_BINDING_RECEPTORS	REACTOME_PEPTIDE_LIGAND_BINDING_RECEPTORS	1/129	18/4668	0.396715	0.516702	0.339082	F2	1	REACTOME	up	NP
REACTOME_TRANSCRIPTIONAL_REGULATION_BY_THE_AP_2_TFAP2_FAMILY_OF_TRANSCRIPTION_FACTORS	REACTOME_TRANSCRIPTIONAL_REGULATION_BY_THE_AP_2_TFAP2_FAMILY_OF_TRANSCRIPTION_FACTORS	REACTOME_TRANSCRIPTIONAL_REGULATION_BY_THE_AP_2_TFAP2_FAMILY_OF_TRANSCRIPTION_FACTORS	1/129	18/4668	0.396715	0.516702	0.339082	Apoe	1	REACTOME	up	NP
REACTOME_TRANSFERRIN_ENDOCYTOSIS_AND_RECYCLING	REACTOME_TRANSFERRIN_ENDOCYTOSIS_AND_RECYCLING	REACTOME_TRANSFERRIN_ENDOCYTOSIS_AND_RECYCLING	1/129	18/4668	0.396715	0.516702	0.339082	Trf	1	REACTOME	up	NP
REACTOME_VEGFR2_MEDIATED_VASCULAR_PERMEABILITY	REACTOME_VEGFR2_MEDIATED_VASCULAR_PERMEABILITY	REACTOME_VEGFR2_MEDIATED_VASCULAR_PERMEABILITY	1/129	18/4668	0.396715	0.516702	0.339082	Ctnnd1	1	REACTOME	up	NP
REACTOME_INTERLEUKIN_1_FAMILY_SIGNALING	REACTOME_INTERLEUKIN_1_FAMILY_SIGNALING	REACTOME_INTERLEUKIN_1_FAMILY_SIGNALING	3/129	84/4668	0.411508	0.533537	0.35013	Ubb/Ubc/Rps27a	3	REACTOME	up	NP
REACTOME_MAPK_TARGETS_NUCLEAR_EVENTS_MEDIATED_BY_MAP_KINASES	REACTOME_MAPK_TARGETS_NUCLEAR_EVENTS_MEDIATED_BY_MAP_KINASES	REACTOME_MAPK_TARGETS_NUCLEAR_EVENTS_MEDIATED_BY_MAP_KINASES	1/129	19/4668	0.413451	0.533537	0.35013	Mef2a	1	REACTOME	up	NP
REACTOME_TRANSCRIPTIONAL_REGULATION_OF_GRANULOPOIESIS	REACTOME_TRANSCRIPTIONAL_REGULATION_OF_GRANULOPOIESIS	REACTOME_TRANSCRIPTIONAL_REGULATION_OF_GRANULOPOIESIS	1/129	19/4668	0.413451	0.533537	0.35013	Cebpb	1	REACTOME	up	NP
REACTOME_COPII_MEDIATED_VESICLE_TRANSPORT	REACTOME_COPII_MEDIATED_VESICLE_TRANSPORT	REACTOME_COPII_MEDIATED_VESICLE_TRANSPORT	2/129	51/4668	0.414105	0.533537	0.35013	Serpina1b/Serpina1e	2	REACTOME	up	NP
REACTOME_SIGNALING_BY_INTERLEUKINS	REACTOME_SIGNALING_BY_INTERLEUKINS	REACTOME_SIGNALING_BY_INTERLEUKINS	7/129	224/4668	0.42527	0.546302	0.358507	Vcam1/Ubb/Csf2ra/Ubc/Mef2a/Rps27a/Ppia	7	REACTOME	up	NP
REACTOME_BETA_CATENIN_INDEPENDENT_WNT_SIGNALING	REACTOME_BETA_CATENIN_INDEPENDENT_WNT_SIGNALING	REACTOME_BETA_CATENIN_INDEPENDENT_WNT_SIGNALING	3/129	86/4668	0.426407	0.546302	0.358507	Ubb/Ubc/Rps27a	3	REACTOME	up	NP
REACTOME_COLLAGEN_DEGRADATION	REACTOME_COLLAGEN_DEGRADATION	REACTOME_COLLAGEN_DEGRADATION	1/129	20/4668	0.429727	0.546302	0.358507	Ctsl	1	REACTOME	up	NP
REACTOME_PEROXISOMAL_LIPID_METABOLISM	REACTOME_PEROXISOMAL_LIPID_METABOLISM	REACTOME_PEROXISOMAL_LIPID_METABOLISM	1/129	20/4668	0.429727	0.546302	0.358507	Scp2	1	REACTOME	up	NP
REACTOME_RUNX2_REGULATES_BONE_DEVELOPMENT	REACTOME_RUNX2_REGULATES_BONE_DEVELOPMENT	REACTOME_RUNX2_REGULATES_BONE_DEVELOPMENT	1/129	20/4668	0.429727	0.546302	0.358507	Maf	1	REACTOME	up	NP
REACTOME_TRANSPORT_TO_THE_GOLGI_AND_SUBSEQUENT_MODIFICATION	REACTOME_TRANSPORT_TO_THE_GOLGI_AND_SUBSEQUENT_MODIFICATION	REACTOME_TRANSPORT_TO_THE_GOLGI_AND_SUBSEQUENT_MODIFICATION	4/129	123/4668	0.443761	0.56046	0.367798	Serpina1b/Serpina1e/Cd55/Ank2	4	REACTOME	up	NP
REACTOME_FOXO_MEDIATED_TRANSCRIPTION_OF_OXIDATIVE_STRESS_METABOLIC_AND_NEURONAL_GENES	REACTOME_FOXO_MEDIATED_TRANSCRIPTION_OF_OXIDATIVE_STRESS_METABOLIC_AND_NEURONAL_GENES	REACTOME_FOXO_MEDIATED_TRANSCRIPTION_OF_OXIDATIVE_STRESS_METABOLIC_AND_NEURONAL_GENES	1/129	21/4668	0.445554	0.56046	0.367798	Cat	1	REACTOME	up	NP
REACTOME_POST_TRANSLATIONAL_MODIFICATION_SYNTHESIS_OF_GPI_ANCHORED_PROTEINS	REACTOME_POST_TRANSLATIONAL_MODIFICATION_SYNTHESIS_OF_GPI_ANCHORED_PROTEINS	REACTOME_POST_TRANSLATIONAL_MODIFICATION_SYNTHESIS_OF_GPI_ANCHORED_PROTEINS	1/129	21/4668	0.445554	0.56046	0.367798	Nrn1	1	REACTOME	up	NP
REACTOME_RHOBTB2_GTPASE_CYCLE	REACTOME_RHOBTB2_GTPASE_CYCLE	REACTOME_RHOBTB2_GTPASE_CYCLE	1/129	21/4668	0.445554	0.56046	0.367798	Hsp90ab1	1	REACTOME	up	NP
REACTOME_TRANSCRIPTIONAL_REGULATION_OF_WHITE_ADIPOCYTE_DIFFERENTIATION	REACTOME_TRANSCRIPTIONAL_REGULATION_OF_WHITE_ADIPOCYTE_DIFFERENTIATION	REACTOME_TRANSCRIPTIONAL_REGULATION_OF_WHITE_ADIPOCYTE_DIFFERENTIATION	2/129	55/4668	0.452226	0.567359	0.372326	Cebpb/Ccnd3	2	REACTOME	up	NP
REACTOME_FATTY_ACYL_COA_BIOSYNTHESIS	REACTOME_FATTY_ACYL_COA_BIOSYNTHESIS	REACTOME_FATTY_ACYL_COA_BIOSYNTHESIS	1/129	22/4668	0.460946	0.574915	0.377284	Scd1	1	REACTOME	up	NP
REACTOME_DEATH_RECEPTOR_SIGNALLING	REACTOME_DEATH_RECEPTOR_SIGNALLING	REACTOME_DEATH_RECEPTOR_SIGNALLING	3/129	91/4668	0.463059	0.574915	0.377284	Ubb/Ubc/Rps27a	3	REACTOME	up	NP
REACTOME_REGULATION_OF_TP53_ACTIVITY	REACTOME_REGULATION_OF_TP53_ACTIVITY	REACTOME_REGULATION_OF_TP53_ACTIVITY	3/129	91/4668	0.463059	0.574915	0.377284	Ubb/Ubc/Rps27a	3	REACTOME	up	NP
REACTOME_S_PHASE	REACTOME_S_PHASE	REACTOME_S_PHASE	3/129	91/4668	0.463059	0.574915	0.377284	Ubb/Ubc/Rps27a	3	REACTOME	up	NP
REACTOME_CELL_CELL_JUNCTION_ORGANIZATION	REACTOME_CELL_CELL_JUNCTION_ORGANIZATION	REACTOME_CELL_CELL_JUNCTION_ORGANIZATION	1/129	23/4668	0.475913	0.586305	0.384759	Ctnnd1	1	REACTOME	up	NP
REACTOME_GAMMA_CARBOXYLATION_HYPUSINE_FORMATION_AND_ARYLSULFATASE_ACTIVATION	REACTOME_GAMMA_CARBOXYLATION_HYPUSINE_FORMATION_AND_ARYLSULFATASE_ACTIVATION	REACTOME_GAMMA_CARBOXYLATION_HYPUSINE_FORMATION_AND_ARYLSULFATASE_ACTIVATION	1/129	23/4668	0.475913	0.586305	0.384759	F2	1	REACTOME	up	NP
REACTOME_GENE_AND_PROTEIN_EXPRESSION_BY_JAK_STAT_SIGNALING_AFTER_INTERLEUKIN_12_STIMULATION	REACTOME_GENE_AND_PROTEIN_EXPRESSION_BY_JAK_STAT_SIGNALING_AFTER_INTERLEUKIN_12_STIMULATION	REACTOME_GENE_AND_PROTEIN_EXPRESSION_BY_JAK_STAT_SIGNALING_AFTER_INTERLEUKIN_12_STIMULATION	1/129	23/4668	0.475913	0.586305	0.384759	Ppia	1	REACTOME	up	NP
REACTOME_FC_EPSILON_RECEPTOR_FCERI_SIGNALING	REACTOME_FC_EPSILON_RECEPTOR_FCERI_SIGNALING	REACTOME_FC_EPSILON_RECEPTOR_FCERI_SIGNALING	3/129	94/4668	0.48457	0.595436	0.390751	Ubb/Ubc/Rps27a	3	REACTOME	up	NP
REACTOME_CRISTAE_FORMATION	REACTOME_CRISTAE_FORMATION	REACTOME_CRISTAE_FORMATION	1/129	24/4668	0.490468	0.596548	0.391481	mt-Atp6	1	REACTOME	up	NP
REACTOME_DISEASES_OF_MITOTIC_CELL_CYCLE	REACTOME_DISEASES_OF_MITOTIC_CELL_CYCLE	REACTOME_DISEASES_OF_MITOTIC_CELL_CYCLE	1/129	24/4668	0.490468	0.596548	0.391481	Ccnd3	1	REACTOME	up	NP
REACTOME_INTERLEUKIN_2_FAMILY_SIGNALING	REACTOME_INTERLEUKIN_2_FAMILY_SIGNALING	REACTOME_INTERLEUKIN_2_FAMILY_SIGNALING	1/129	24/4668	0.490468	0.596548	0.391481	Csf2ra	1	REACTOME	up	NP
REACTOME_RHOF_GTPASE_CYCLE	REACTOME_RHOF_GTPASE_CYCLE	REACTOME_RHOF_GTPASE_CYCLE	1/129	24/4668	0.490468	0.596548	0.391481	Arhgap39	1	REACTOME	up	NP
REACTOME_TP53_REGULATES_TRANSCRIPTION_OF_CELL_CYCLE_GENES	REACTOME_TP53_REGULATES_TRANSCRIPTION_OF_CELL_CYCLE_GENES	REACTOME_TP53_REGULATES_TRANSCRIPTION_OF_CELL_CYCLE_GENES	1/129	25/4668	0.504621	0.612206	0.401756	Btg2	1	REACTOME	up	NP
REACTOME_CLASS_A_1_RHODOPSIN_LIKE_RECEPTORS	REACTOME_CLASS_A_1_RHODOPSIN_LIKE_RECEPTORS	REACTOME_CLASS_A_1_RHODOPSIN_LIKE_RECEPTORS	1/129	26/4668	0.518385	0.625485	0.41047	F2	1	REACTOME	up	NP
REACTOME_COLLAGEN_FORMATION	REACTOME_COLLAGEN_FORMATION	REACTOME_COLLAGEN_FORMATION	1/129	26/4668	0.518385	0.625485	0.41047	Ctsl	1	REACTOME	up	NP
REACTOME_LEISHMANIA_INFECTION	REACTOME_LEISHMANIA_INFECTION	REACTOME_LEISHMANIA_INFECTION	3/129	99/4668	0.519492	0.625485	0.41047	Cd163/Txnip/Hsp90ab1	3	REACTOME	up	NP
REACTOME_TCF_DEPENDENT_SIGNALING_IN_RESPONSE_TO_WNT	REACTOME_TCF_DEPENDENT_SIGNALING_IN_RESPONSE_TO_WNT	REACTOME_TCF_DEPENDENT_SIGNALING_IN_RESPONSE_TO_WNT	3/129	100/4668	0.526326	0.63212	0.414824	Ubb/Ubc/Rps27a	3	REACTOME	up	NP
REACTOME_INOSITOL_PHOSPHATE_METABOLISM	REACTOME_INOSITOL_PHOSPHATE_METABOLISM	REACTOME_INOSITOL_PHOSPHATE_METABOLISM	1/129	27/4668	0.531769	0.635464	0.417019	Pten	1	REACTOME	up	NP
REACTOME_MRNA_SPLICING_MINOR_PATHWAY	REACTOME_MRNA_SPLICING_MINOR_PATHWAY	REACTOME_MRNA_SPLICING_MINOR_PATHWAY	1/129	27/4668	0.531769	0.635464	0.417019	Srsf7	1	REACTOME	up	NP
REACTOME_SEPARATION_OF_SISTER_CHROMATIDS	REACTOME_SEPARATION_OF_SISTER_CHROMATIDS	REACTOME_SEPARATION_OF_SISTER_CHROMATIDS	3/129	101/4668	0.533107	0.635474	0.417025	Ubb/Ubc/Rps27a	3	REACTOME	up	NP
REACTOME_INTERLEUKIN_12_SIGNALING	REACTOME_INTERLEUKIN_12_SIGNALING	REACTOME_INTERLEUKIN_12_SIGNALING	1/129	28/4668	0.544784	0.647778	0.4251	Ppia	1	REACTOME	up	NP
REACTOME_TRANSCRIPTIONAL_REGULATION_BY_VENTX	REACTOME_TRANSCRIPTIONAL_REGULATION_BY_VENTX	REACTOME_TRANSCRIPTIONAL_REGULATION_BY_VENTX	1/129	29/4668	0.557439	0.661181	0.433896	Cebpb	1	REACTOME	up	NP
REACTOME_METABOLISM_OF_CARBOHYDRATES	REACTOME_METABOLISM_OF_CARBOHYDRATES	REACTOME_METABOLISM_OF_CARBOHYDRATES	4/129	143/4668	0.562583	0.66563	0.436815	Ubb/Ubc/Aldob/Rps27a	4	REACTOME	up	NP
REACTOME_COPI_MEDIATED_ANTEROGRADE_TRANSPORT	REACTOME_COPI_MEDIATED_ANTEROGRADE_TRANSPORT	REACTOME_COPI_MEDIATED_ANTEROGRADE_TRANSPORT	2/129	68/4668	0.565661	0.667619	0.43812	Cd55/Ank2	2	REACTOME	up	NP
REACTOME_MITOCHONDRIAL_FATTY_ACID_BETA_OXIDATION	REACTOME_MITOCHONDRIAL_FATTY_ACID_BETA_OXIDATION	REACTOME_MITOCHONDRIAL_FATTY_ACID_BETA_OXIDATION	1/129	30/4668	0.569746	0.669137	0.439116	Dbi	1	REACTOME	up	NP
REACTOME_RHOBTB_GTPASE_CYCLE	REACTOME_RHOBTB_GTPASE_CYCLE	REACTOME_RHOBTB_GTPASE_CYCLE	1/129	30/4668	0.569746	0.669137	0.439116	Hsp90ab1	1	REACTOME	up	NP
REACTOME_DISEASES_OF_SIGNAL_TRANSDUCTION_BY_GROWTH_FACTOR_RECEPTORS_AND_SECOND_MESSENGERS	REACTOME_DISEASES_OF_SIGNAL_TRANSDUCTION_BY_GROWTH_FACTOR_RECEPTORS_AND_SECOND_MESSENGERS	REACTOME_DISEASES_OF_SIGNAL_TRANSDUCTION_BY_GROWTH_FACTOR_RECEPTORS_AND_SECOND_MESSENGERS	8/129	294/4668	0.571464	0.669509	0.439361	Fgb/Fgg/Ubb/Ubc/Cebpb/Pten/Rps27a/Fga	8	REACTOME	up	NP
REACTOME_SIGNALING_BY_RECEPTOR_TYROSINE_KINASES	REACTOME_SIGNALING_BY_RECEPTOR_TYROSINE_KINASES	REACTOME_SIGNALING_BY_RECEPTOR_TYROSINE_KINASES	8/129	296/4668	0.57936	0.677101	0.444343	Apoe/Ubb/Id3/Ctnnd1/Ubc/Mef2a/Plg/Rps27a	8	REACTOME	up	NP
REACTOME_METABOLISM_OF_WATER_SOLUBLE_VITAMINS_AND_COFACTORS	REACTOME_METABOLISM_OF_WATER_SOLUBLE_VITAMINS_AND_COFACTORS	REACTOME_METABOLISM_OF_WATER_SOLUBLE_VITAMINS_AND_COFACTORS	2/129	70/4668	0.581564	0.678018	0.444945	Cyp8b1/Cd38	2	REACTOME	up	NP
REACTOME_APOPTOSIS	REACTOME_APOPTOSIS	REACTOME_APOPTOSIS	3/129	110/4668	0.591608	0.68805	0.451528	Ubb/Ubc/Rps27a	3	REACTOME	up	NP
REACTOME_INTERLEUKIN_12_FAMILY_SIGNALING	REACTOME_INTERLEUKIN_12_FAMILY_SIGNALING	REACTOME_INTERLEUKIN_12_FAMILY_SIGNALING	1/129	32/4668	0.59335	0.688401	0.451758	Ppia	1	REACTOME	up	NP
REACTOME_SIGNALING_BY_NTRKS	REACTOME_SIGNALING_BY_NTRKS	REACTOME_SIGNALING_BY_NTRKS	2/129	74/4668	0.612088	0.708421	0.464897	Id3/Mef2a	2	REACTOME	up	NP
REACTOME_NON_INTEGRIN_MEMBRANE_ECM_INTERACTIONS	REACTOME_NON_INTEGRIN_MEMBRANE_ECM_INTERACTIONS	REACTOME_NON_INTEGRIN_MEMBRANE_ECM_INTERACTIONS	1/129	34/4668	0.615668	0.710843	0.466486	Ttr	1	REACTOME	up	NP
REACTOME_ACTIVATION_OF_GENE_EXPRESSION_BY_SREBF_SREBP	REACTOME_ACTIVATION_OF_GENE_EXPRESSION_BY_SREBF_SREBP	REACTOME_ACTIVATION_OF_GENE_EXPRESSION_BY_SREBF_SREBP	1/129	36/4668	0.63677	0.728172	0.477858	Scd1	1	REACTOME	up	NP
REACTOME_RHOD_GTPASE_CYCLE	REACTOME_RHOD_GTPASE_CYCLE	REACTOME_RHOD_GTPASE_CYCLE	1/129	36/4668	0.63677	0.728172	0.477858	Arhgap39	1	REACTOME	up	NP
REACTOME_SEMAPHORIN_INTERACTIONS	REACTOME_SEMAPHORIN_INTERACTIONS	REACTOME_SEMAPHORIN_INTERACTIONS	1/129	36/4668	0.63677	0.728172	0.477858	Hsp90ab1	1	REACTOME	up	NP
REACTOME_SIGNALING_BY_PDGF	REACTOME_SIGNALING_BY_PDGF	REACTOME_SIGNALING_BY_PDGF	1/129	36/4668	0.63677	0.728172	0.477858	Plg	1	REACTOME	up	NP
REACTOME_ACTIVATION_OF_ANTERIOR_HOX_GENES_IN_HINDBRAIN_DEVELOPMENT_DURING_EARLY_EMBRYOGENESIS	REACTOME_ACTIVATION_OF_ANTERIOR_HOX_GENES_IN_HINDBRAIN_DEVELOPMENT_DURING_EARLY_EMBRYOGENESIS	REACTOME_ACTIVATION_OF_ANTERIOR_HOX_GENES_IN_HINDBRAIN_DEVELOPMENT_DURING_EARLY_EMBRYOGENESIS	1/129	37/4668	0.646886	0.737975	0.484291	Mafb	1	REACTOME	up	NP
REACTOME_SIGNALING_BY_NOTCH	REACTOME_SIGNALING_BY_NOTCH	REACTOME_SIGNALING_BY_NOTCH	3/129	120/4668	0.650887	0.740772	0.486126	Ubb/Ubc/Rps27a	3	REACTOME	up	NP
REACTOME_IRE1ALPHA_ACTIVATES_CHAPERONES	REACTOME_IRE1ALPHA_ACTIVATES_CHAPERONES	REACTOME_IRE1ALPHA_ACTIVATES_CHAPERONES	1/129	38/4668	0.656722	0.745637	0.489319	Hspa5	1	REACTOME	up	NP
REACTOME_CELL_JUNCTION_ORGANIZATION	REACTOME_CELL_JUNCTION_ORGANIZATION	REACTOME_CELL_JUNCTION_ORGANIZATION	1/129	39/4668	0.666286	0.754704	0.495269	Ctnnd1	1	REACTOME	up	NP
REACTOME_HEME_SIGNALING	REACTOME_HEME_SIGNALING	REACTOME_HEME_SIGNALING	1/129	40/4668	0.675586	0.761628	0.499813	Apoa1	1	REACTOME	up	NP
REACTOME_METABOLISM_OF_POLYAMINES	REACTOME_METABOLISM_OF_POLYAMINES	REACTOME_METABOLISM_OF_POLYAMINES	1/129	40/4668	0.675586	0.761628	0.499813	Oaz1	1	REACTOME	up	NP
REACTOME_ANTI_INFLAMMATORY_RESPONSE_FAVOURING_LEISHMANIA_PARASITE_INFECTION	REACTOME_ANTI_INFLAMMATORY_RESPONSE_FAVOURING_LEISHMANIA_PARASITE_INFECTION	REACTOME_ANTI_INFLAMMATORY_RESPONSE_FAVOURING_LEISHMANIA_PARASITE_INFECTION	1/129	41/4668	0.684629	0.764609	0.501769	Cd163	1	REACTOME	up	NP
REACTOME_GLYCOLYSIS	REACTOME_GLYCOLYSIS	REACTOME_GLYCOLYSIS	1/129	41/4668	0.684629	0.764609	0.501769	Aldob	1	REACTOME	up	NP
REACTOME_INTERLEUKIN_4_AND_INTERLEUKIN_13_SIGNALING	REACTOME_INTERLEUKIN_4_AND_INTERLEUKIN_13_SIGNALING	REACTOME_INTERLEUKIN_4_AND_INTERLEUKIN_13_SIGNALING	1/129	41/4668	0.684629	0.764609	0.501769	Vcam1	1	REACTOME	up	NP
REACTOME_SYNTHESIS_OF_PIPS_AT_THE_PLASMA_MEMBRANE	REACTOME_SYNTHESIS_OF_PIPS_AT_THE_PLASMA_MEMBRANE	REACTOME_SYNTHESIS_OF_PIPS_AT_THE_PLASMA_MEMBRANE	1/129	41/4668	0.684629	0.764609	0.501769	Pten	1	REACTOME	up	NP
REACTOME_MITOTIC_METAPHASE_AND_ANAPHASE	REACTOME_MITOTIC_METAPHASE_AND_ANAPHASE	REACTOME_MITOTIC_METAPHASE_AND_ANAPHASE	3/129	127/4668	0.688632	0.765503	0.502356	Ubb/Ubc/Rps27a	3	REACTOME	up	NP
REACTOME_PROGRAMMED_CELL_DEATH	REACTOME_PROGRAMMED_CELL_DEATH	REACTOME_PROGRAMMED_CELL_DEATH	3/129	127/4668	0.688632	0.765503	0.502356	Ubb/Ubc/Rps27a	3	REACTOME	up	NP
REACTOME_GOLGI_ASSOCIATED_VESICLE_BIOGENESIS	REACTOME_GOLGI_ASSOCIATED_VESICLE_BIOGENESIS	REACTOME_GOLGI_ASSOCIATED_VESICLE_BIOGENESIS	1/129	42/4668	0.693421	0.767258	0.503508	Fth1	1	REACTOME	up	NP
REACTOME_REGULATION_OF_PTEN_GENE_TRANSCRIPTION	REACTOME_REGULATION_OF_PTEN_GENE_TRANSCRIPTION	REACTOME_REGULATION_OF_PTEN_GENE_TRANSCRIPTION	1/129	42/4668	0.693421	0.767258	0.503508	Pten	1	REACTOME	up	NP
REACTOME_DEUBIQUITINATION	REACTOME_DEUBIQUITINATION	REACTOME_DEUBIQUITINATION	4/129	170/4668	0.698672	0.770514	0.505644	Ubb/Ubc/Pten/Rps27a	4	REACTOME	up	NP
REACTOME_SLC_MEDIATED_TRANSMEMBRANE_TRANSPORT	REACTOME_SLC_MEDIATED_TRANSMEMBRANE_TRANSPORT	REACTOME_SLC_MEDIATED_TRANSMEMBRANE_TRANSPORT	2/129	87/4668	0.699588	0.770514	0.505644	Slc38a4/Slc3a2	2	REACTOME	up	NP
REACTOME_RNA_POLYMERASE_II_TRANSCRIPTION_TERMINATION	REACTOME_RNA_POLYMERASE_II_TRANSCRIPTION_TERMINATION	REACTOME_RNA_POLYMERASE_II_TRANSCRIPTION_TERMINATION	1/129	44/4668	0.710283	0.780495	0.512195	Srsf7	1	REACTOME	up	NP
REACTOME_CELL_CYCLE_CHECKPOINTS	REACTOME_CELL_CYCLE_CHECKPOINTS	REACTOME_CELL_CYCLE_CHECKPOINTS	3/129	132/4668	0.713691	0.782441	0.513472	Ubb/Ubc/Rps27a	3	REACTOME	up	NP
REACTOME_RHOB_GTPASE_CYCLE	REACTOME_RHOB_GTPASE_CYCLE	REACTOME_RHOB_GTPASE_CYCLE	1/129	45/4668	0.718366	0.785764	0.515652	Arhgap39	1	REACTOME	up	NP
REACTOME_SLC_TRANSPORTER_DISORDERS	REACTOME_SLC_TRANSPORTER_DISORDERS	REACTOME_SLC_TRANSPORTER_DISORDERS	1/129	46/4668	0.726225	0.792546	0.520103	Slc3a2	1	REACTOME	up	NP
REACTOME_SIGNALING_BY_ALK_IN_CANCER	REACTOME_SIGNALING_BY_ALK_IN_CANCER	REACTOME_SIGNALING_BY_ALK_IN_CANCER	1/129	47/4668	0.733866	0.799061	0.524378	Cebpb	1	REACTOME	up	NP
REACTOME_NEDDYLATION	REACTOME_NEDDYLATION	REACTOME_NEDDYLATION	3/129	137/4668	0.737185	0.800851	0.525553	Ubb/Ubc/Rps27a	3	REACTOME	up	NP
REACTOME_REGULATION_OF_CHOLESTEROL_BIOSYNTHESIS_BY_SREBP_SREBF	REACTOME_REGULATION_OF_CHOLESTEROL_BIOSYNTHESIS_BY_SREBP_SREBF	REACTOME_REGULATION_OF_CHOLESTEROL_BIOSYNTHESIS_BY_SREBP_SREBF	1/129	48/4668	0.741295	0.80349	0.527285	Scd1	1	REACTOME	up	NP
REACTOME_ESR_MEDIATED_SIGNALING	REACTOME_ESR_MEDIATED_SIGNALING	REACTOME_ESR_MEDIATED_SIGNALING	2/129	95/4668	0.744929	0.805602	0.528671	Fkbp5/Hsp90ab1	2	REACTOME	up	NP
REACTOME_RHOC_GTPASE_CYCLE	REACTOME_RHOC_GTPASE_CYCLE	REACTOME_RHOC_GTPASE_CYCLE	1/129	50/4668	0.755542	0.815235	0.534992	Arhgap39	1	REACTOME	up	NP
REACTOME_L1CAM_INTERACTIONS	REACTOME_L1CAM_INTERACTIONS	REACTOME_L1CAM_INTERACTIONS	1/129	51/4668	0.762371	0.82075	0.538612	Ank2	1	REACTOME	up	NP
REACTOME_GLUCOSE_METABOLISM	REACTOME_GLUCOSE_METABOLISM	REACTOME_GLUCOSE_METABOLISM	1/129	53/4668	0.775465	0.829433	0.54431	Aldob	1	REACTOME	up	NP
REACTOME_TRANS_GOLGI_NETWORK_VESICLE_BUDDING	REACTOME_TRANS_GOLGI_NETWORK_VESICLE_BUDDING	REACTOME_TRANS_GOLGI_NETWORK_VESICLE_BUDDING	1/129	53/4668	0.775465	0.829433	0.54431	Fth1	1	REACTOME	up	NP
REACTOME_DNA_REPAIR	REACTOME_DNA_REPAIR	REACTOME_DNA_REPAIR	3/129	146/4668	0.775642	0.829433	0.54431	Ubb/Ubc/Rps27a	3	REACTOME	up	NP
REACTOME_RHOG_GTPASE_CYCLE	REACTOME_RHOG_GTPASE_CYCLE	REACTOME_RHOG_GTPASE_CYCLE	1/129	54/4668	0.781742	0.83409	0.547366	Arhgap39	1	REACTOME	up	NP
REACTOME_PI3K_AKT_SIGNALING_IN_CANCER	REACTOME_PI3K_AKT_SIGNALING_IN_CANCER	REACTOME_PI3K_AKT_SIGNALING_IN_CANCER	1/129	55/4668	0.787844	0.837724	0.549751	Pten	1	REACTOME	up	NP
REACTOME_INTRACELLULAR_SIGNALING_BY_SECOND_MESSENGERS	REACTOME_INTRACELLULAR_SIGNALING_BY_SECOND_MESSENGERS	REACTOME_INTRACELLULAR_SIGNALING_BY_SECOND_MESSENGERS	4/129	193/4668	0.788652	0.837724	0.549751	Ubb/Ubc/Pten/Rps27a	4	REACTOME	up	NP
REACTOME_SIGNALING_BY_WNT	REACTOME_SIGNALING_BY_WNT	REACTOME_SIGNALING_BY_WNT	3/129	153/4668	0.802294	0.849587	0.557536	Ubb/Ubc/Rps27a	3	REACTOME	up	NP
REACTOME_NEGATIVE_REGULATION_OF_THE_PI3K_AKT_NETWORK	REACTOME_NEGATIVE_REGULATION_OF_THE_PI3K_AKT_NETWORK	REACTOME_NEGATIVE_REGULATION_OF_THE_PI3K_AKT_NETWORK	1/129	58/4668	0.805153	0.849587	0.557536	Pten	1	REACTOME	up	NP
REACTOME_TRANSPORT_OF_MATURE_TRANSCRIPT_TO_CYTOPLASM	REACTOME_TRANSPORT_OF_MATURE_TRANSCRIPT_TO_CYTOPLASM	REACTOME_TRANSPORT_OF_MATURE_TRANSCRIPT_TO_CYTOPLASM	1/129	58/4668	0.805153	0.849587	0.557536	Srsf7	1	REACTOME	up	NP
REACTOME_G_ALPHA_Q_SIGNALLING_EVENTS	REACTOME_G_ALPHA_Q_SIGNALLING_EVENTS	REACTOME_G_ALPHA_Q_SIGNALLING_EVENTS	1/129	59/4668	0.810605	0.851581	0.558844	F2	1	REACTOME	up	NP
REACTOME_RAC2_GTPASE_CYCLE	REACTOME_RAC2_GTPASE_CYCLE	REACTOME_RAC2_GTPASE_CYCLE	1/129	59/4668	0.810605	0.851581	0.558844	Arhgap39	1	REACTOME	up	NP
REACTOME_MHC_CLASS_II_ANTIGEN_PRESENTATION	REACTOME_MHC_CLASS_II_ANTIGEN_PRESENTATION	REACTOME_MHC_CLASS_II_ANTIGEN_PRESENTATION	1/129	61/4668	0.82106	0.857862	0.562966	Ctsl	1	REACTOME	up	NP
REACTOME_ESTROGEN_DEPENDENT_GENE_EXPRESSION	REACTOME_ESTROGEN_DEPENDENT_GENE_EXPRESSION	REACTOME_ESTROGEN_DEPENDENT_GENE_EXPRESSION	1/129	62/4668	0.82607	0.857862	0.562966	Hsp90ab1	1	REACTOME	up	NP
REACTOME_FCGAMMA_RECEPTOR_FCGR_DEPENDENT_PHAGOCYTOSIS	REACTOME_FCGAMMA_RECEPTOR_FCGR_DEPENDENT_PHAGOCYTOSIS	REACTOME_FCGAMMA_RECEPTOR_FCGR_DEPENDENT_PHAGOCYTOSIS	1/129	62/4668	0.82607	0.857862	0.562966	Hsp90ab1	1	REACTOME	up	NP
REACTOME_PI_METABOLISM	REACTOME_PI_METABOLISM	REACTOME_PI_METABOLISM	1/129	62/4668	0.82607	0.857862	0.562966	Pten	1	REACTOME	up	NP
REACTOME_POTENTIAL_THERAPEUTICS_FOR_SARS	REACTOME_POTENTIAL_THERAPEUTICS_FOR_SARS	REACTOME_POTENTIAL_THERAPEUTICS_FOR_SARS	1/129	62/4668	0.82607	0.857862	0.562966	Hsp90ab1	1	REACTOME	up	NP
REACTOME_CELL_CELL_COMMUNICATION	REACTOME_CELL_CELL_COMMUNICATION	REACTOME_CELL_CELL_COMMUNICATION	1/129	63/4668	0.830942	0.857862	0.562966	Ctnnd1	1	REACTOME	up	NP
REACTOME_NEUROTRANSMITTER_RECEPTORS_AND_POSTSYNAPTIC_SIGNAL_TRANSMISSION	REACTOME_NEUROTRANSMITTER_RECEPTORS_AND_POSTSYNAPTIC_SIGNAL_TRANSMISSION	REACTOME_NEUROTRANSMITTER_RECEPTORS_AND_POSTSYNAPTIC_SIGNAL_TRANSMISSION	1/129	63/4668	0.830942	0.857862	0.562966	Kcnj16	1	REACTOME	up	NP
REACTOME_RAC3_GTPASE_CYCLE	REACTOME_RAC3_GTPASE_CYCLE	REACTOME_RAC3_GTPASE_CYCLE	1/129	63/4668	0.830942	0.857862	0.562966	Arhgap39	1	REACTOME	up	NP
REACTOME_CELL_CYCLE_MITOTIC	REACTOME_CELL_CYCLE_MITOTIC	REACTOME_CELL_CYCLE_MITOTIC	5/129	266/4668	0.867844	0.894029	0.5867	Ubb/Ubc/Ccnd3/Rps27a/Hsp90ab1	5	REACTOME	up	NP
REACTOME_SIGNALING_BY_VEGF	REACTOME_SIGNALING_BY_VEGF	REACTOME_SIGNALING_BY_VEGF	1/129	76/4668	0.883209	0.907901	0.595804	Ctnnd1	1	REACTOME	up	NP
REACTOME_MITOCHONDRIAL_BIOGENESIS	REACTOME_MITOCHONDRIAL_BIOGENESIS	REACTOME_MITOCHONDRIAL_BIOGENESIS	1/129	77/4668	0.88649	0.909318	0.596734	mt-Atp6	1	REACTOME	up	NP
REACTOME_TRANSMISSION_ACROSS_CHEMICAL_SYNAPSES	REACTOME_TRANSMISSION_ACROSS_CHEMICAL_SYNAPSES	REACTOME_TRANSMISSION_ACROSS_CHEMICAL_SYNAPSES	1/129	87/4668	0.914664	0.936208	0.61438	Kcnj16	1	REACTOME	up	NP
REACTOME_ANTIGEN_PROCESSING_UBIQUITINATION_PROTEASOME_DEGRADATION	REACTOME_ANTIGEN_PROCESSING_UBIQUITINATION_PROTEASOME_DEGRADATION	REACTOME_ANTIGEN_PROCESSING_UBIQUITINATION_PROTEASOME_DEGRADATION	3/129	202/4668	0.923975	0.943718	0.619308	Ubb/Ubc/Rps27a	3	REACTOME	up	NP
REACTOME_M_PHASE	REACTOME_M_PHASE	REACTOME_M_PHASE	3/129	208/4668	0.932861	0.950763	0.623931	Ubb/Ubc/Rps27a	3	REACTOME	up	NP
REACTOME_RHOA_GTPASE_CYCLE	REACTOME_RHOA_GTPASE_CYCLE	REACTOME_RHOA_GTPASE_CYCLE	1/129	101/4668	0.942824	0.958872	0.629253	Arhgap39	1	REACTOME	up	NP
REACTOME_CDC42_GTPASE_CYCLE	REACTOME_CDC42_GTPASE_CYCLE	REACTOME_CDC42_GTPASE_CYCLE	1/129	103/4668	0.946009	0.960068	0.630038	Arhgap39	1	REACTOME	up	NP
REACTOME_SIGNALING_BY_GPCR	REACTOME_SIGNALING_BY_GPCR	REACTOME_SIGNALING_BY_GPCR	2/129	167/4668	0.949565	0.961636	0.631067	F2/Cd55	2	REACTOME	up	NP
REACTOME_NEURONAL_SYSTEM	REACTOME_NEURONAL_SYSTEM	REACTOME_NEURONAL_SYSTEM	1/129	119/4668	0.965896	0.976107	0.640563	Kcnj16	1	REACTOME	up	NP
REACTOME_MRNA_SPLICING	REACTOME_MRNA_SPLICING	REACTOME_MRNA_SPLICING	1/129	123/4668	0.969604	0.976596	0.640885	Srsf7	1	REACTOME	up	NP
REACTOME_RAC1_GTPASE_CYCLE	REACTOME_RAC1_GTPASE_CYCLE	REACTOME_RAC1_GTPASE_CYCLE	1/129	124/4668	0.970467	0.976596	0.640885	Arhgap39	1	REACTOME	up	NP
REACTOME_PHOSPHOLIPID_METABOLISM	REACTOME_PHOSPHOLIPID_METABOLISM	REACTOME_PHOSPHOLIPID_METABOLISM	1/129	128/4668	0.973682	0.977773	0.641657	Pten	1	REACTOME	up	NP
REACTOME_PROCESSING_OF_CAPPED_INTRON_CONTAINING_PRE_MRNA	REACTOME_PROCESSING_OF_CAPPED_INTRON_CONTAINING_PRE_MRNA	REACTOME_PROCESSING_OF_CAPPED_INTRON_CONTAINING_PRE_MRNA	1/129	159/4668	0.989263	0.991337	0.650558	Srsf7	1	REACTOME	up	NP
REACTOME_ORGANELLE_BIOGENESIS_AND_MAINTENANCE	REACTOME_ORGANELLE_BIOGENESIS_AND_MAINTENANCE	REACTOME_ORGANELLE_BIOGENESIS_AND_MAINTENANCE	1/129	178/4668	0.993822	0.993822	0.652189	mt-Atp6	1	REACTOME	up	NP
GOBP_HUMORAL_IMMUNE_RESPONSE	GOBP_HUMORAL_IMMUNE_RESPONSE	GOBP_HUMORAL_IMMUNE_RESPONSE	14/131	75/5089	4.12223986871647e-09	1.52935099129381e-06	1.22365436102952e-06	Trf/Fgb/Cd81/C1qa/Vsig4/F2/C8g/Rarres2/C1qc/H2-Q10/Cfh/Cd55/Rpl30/Fga	14	GO BP	up	NP
GOBP_RESPONSE_TO_BACTERIUM	GOBP_RESPONSE_TO_BACTERIUM	GOBP_RESPONSE_TO_BACTERIUM	23/131	245/5089	4.23510005894786e-08	7.85611060934828e-06	6.28578008749103e-06	Car3/Fkbp5/Vcam1/Trf/Fgb/Hamp/B2m/Cyp2e1/Colec12/Cebpb/F2/H2-D1/Ass1/Rarres2/H2-Q10/Zfp36/Gjb2/Cd55/Hpgd/Rpl30/Fga/Gpx1/Tent5a	23	GO BP	up	NP
GOBP_CELL_KILLING	GOBP_CELL_KILLING	GOBP_CELL_KILLING	10/131	59/5089	1.94843186980363e-06	0.000240956	0.000192792	Hamp/B2m/F2/H2-D1/H2-Q10/Azgp1/Cfh/Cd55/Rpl30/Hsp90ab1	10	GO BP	up	NP
GOBP_DIGESTION	GOBP_DIGESTION	GOBP_DIGESTION	9/131	48/5089	2.70185607095845e-06	0.000250597	0.000200506	Fabp1/Apoa2/Apoa1/Rbp4/Hamp/Serpina3k/Cyp8b1/Akr1c6/Apoa5	9	GO BP	up	NP
GOBP_REGULATION_OF_COAGULATION	GOBP_REGULATION_OF_COAGULATION	GOBP_REGULATION_OF_COAGULATION	8/131	39/5089	4.89236794126617e-06	0.000363014	0.000290452	Apoe/Fgb/Fgg/Apoh/F2/Plg/Fga/Serpinc1	8	GO BP	up	NP
GOBP_DIGESTIVE_SYSTEM_PROCESS	GOBP_DIGESTIVE_SYSTEM_PROCESS	GOBP_DIGESTIVE_SYSTEM_PROCESS	8/131	41/5089	7.27570305816836e-06	0.000449881	0.000359956	Fabp1/Apoa2/Apoa1/Rbp4/Hamp/Serpina3k/Cyp8b1/Apoa5	8	GO BP	up	NP
GOBP_REGULATION_OF_CELL_KILLING	GOBP_REGULATION_OF_CELL_KILLING	GOBP_REGULATION_OF_CELL_KILLING	7/131	35/5089	2.35158136219584e-05	0.00124634	0.000997212	B2m/H2-D1/H2-Q10/Azgp1/Cfh/Cd55/Hsp90ab1	7	GO BP	up	NP
GOBP_REGULATION_OF_LIPID_LOCALIZATION	GOBP_REGULATION_OF_LIPID_LOCALIZATION	GOBP_REGULATION_OF_LIPID_LOCALIZATION	10/131	95/5089	0.0001427	0.0066177	0.00529491	Apoa2/Apoe/Apoa1/Dbi/Apoc1/Apoc3/Apoc4/Scp2/Cyp8b1/Apoa5	10	GO BP	up	NP
GOBP_RESPONSE_TO_INORGANIC_SUBSTANCE	GOBP_RESPONSE_TO_INORGANIC_SUBSTANCE	GOBP_RESPONSE_TO_INORGANIC_SUBSTANCE	17/131	249/5089	0.000188247	0.00775995	0.00620884	Fabp1/Vcam1/Trf/Fgb/Fgg/Hamp/B2m/Cat/Cyp2e1/Hspa5/Mef2a/Ass1/Otc/Klf2/Fga/Txnip/Gpx1	17	GO BP	up	NP
GOBP_COMPLEMENT_ACTIVATION	GOBP_COMPLEMENT_ACTIVATION	GOBP_COMPLEMENT_ACTIVATION	6/131	35/5089	0.000227955	0.00845713	0.00676666	C1qa/Vsig4/C8g/C1qc/Cfh/Cd55	6	GO BP	up	NP
GOBP_LIPID_LOCALIZATION	GOBP_LIPID_LOCALIZATION	GOBP_LIPID_LOCALIZATION	16/131	233/5089	0.000276019	0.00930938	0.00744856	Fabp1/Apoa2/Apoe/Apoa1/Rbp4/Dbi/Apoc1/Apoc3/Apoh/Abca9/Apoc4/Scp2/Cyp8b1/Akr1c6/Plg/Apoa5	16	GO BP	up	NP
GOBP_REGULATION_OF_IMMUNE_EFFECTOR_PROCESS	GOBP_REGULATION_OF_IMMUNE_EFFECTOR_PROCESS	GOBP_REGULATION_OF_IMMUNE_EFFECTOR_PROCESS	12/131	145/5089	0.000312501	0.0096615	0.0077303	Apoa2/Apoa1/Rbp4/Cd81/Vsig4/B2m/H2-D1/H2-Q10/Azgp1/Cfh/Cd55/Appl2	12	GO BP	up	NP
GOBP_LIPID_DIGESTION	GOBP_LIPID_DIGESTION	GOBP_LIPID_DIGESTION	4/131	14/5089	0.000343603	0.0098059	0.00784583	Apoa2/Apoa1/Cyp8b1/Apoa5	4	GO BP	up	NP
GOBP_REGENERATION	GOBP_REGENERATION	GOBP_REGENERATION	9/131	88/5089	0.000385539	0.0099983	0.00799977	Apoa2/Cd81/Hamp/Rgn/Cebpb/Pten/Plg/Apoa5/Gpx1	9	GO BP	up	NP
GOBP_CYTOKINE_PRODUCTION_INVOLVED_IN_IMMUNE_RESPONSE	GOBP_CYTOKINE_PRODUCTION_INVOLVED_IN_IMMUNE_RESPONSE	GOBP_CYTOKINE_PRODUCTION_INVOLVED_IN_IMMUNE_RESPONSE	6/131	39/5089	0.000421114	0.0099983	0.00799977	Apoa2/Apoa1/Cd81/B2m/H2-Q10/Cd55	6	GO BP	up	NP
GOBP_ANTIGEN_PROCESSING_AND_PRESENTATION_OF_ENDOGENOUS_ANTIGEN	GOBP_ANTIGEN_PROCESSING_AND_PRESENTATION_OF_ENDOGENOUS_ANTIGEN	GOBP_ANTIGEN_PROCESSING_AND_PRESENTATION_OF_ENDOGENOUS_ANTIGEN	4/131	15/5089	0.000459254	0.0099983	0.00799977	B2m/H2-D1/H2-Q10/Azgp1	4	GO BP	up	NP
GOBP_RESPONSE_TO_NICOTINE	GOBP_RESPONSE_TO_NICOTINE	GOBP_RESPONSE_TO_NICOTINE	4/131	15/5089	0.000459254	0.0099983	0.00799977	Vcam1/B2m/mt-Nd4/Gpx1	4	GO BP	up	NP
GOBP_CELLULAR_OXIDANT_DETOXIFICATION	GOBP_CELLULAR_OXIDANT_DETOXIFICATION	GOBP_CELLULAR_OXIDANT_DETOXIFICATION	6/131	40/5089	0.000485093	0.0099983	0.00799977	Alb/Fabp1/Apoe/Mgst1/Cat/Gpx1	6	GO BP	up	NP
GOBP_IMMUNE_EFFECTOR_PROCESS	GOBP_IMMUNE_EFFECTOR_PROCESS	GOBP_IMMUNE_EFFECTOR_PROCESS	16/131	254/5089	0.000723673	0.0133644	0.010693	Apoa2/Apoa1/Rbp4/Cd81/C1qa/Vsig4/B2m/F2/H2-D1/C8g/C1qc/H2-Q10/Azgp1/Cfh/Cd55/Appl2	16	GO BP	up	NP
GOBP_RESPONSE_TO_WOUNDING	GOBP_RESPONSE_TO_WOUNDING	GOBP_RESPONSE_TO_WOUNDING	16/131	254/5089	0.000723673	0.0133644	0.010693	Apoe/Serpina1b/Fgb/Fgg/Apoh/Serpina1e/Id3/F2/Zfp36l1/Pten/Zfp36/Plg/Fga/Gpx1/Serpinc1/Ppia	16	GO BP	up	NP
GOBP_PLASMA_LIPOPROTEIN_PARTICLE_CLEARANCE	GOBP_PLASMA_LIPOPROTEIN_PARTICLE_CLEARANCE	GOBP_PLASMA_LIPOPROTEIN_PARTICLE_CLEARANCE	5/131	29/5089	0.000756476	0.0133644	0.010693	Apoa2/Apoe/Apoa1/Apoc1/Apoc3	5	GO BP	up	NP
GOBP_ANTIGEN_PROCESSING_AND_PRESENTATION_OF_PEPTIDE_ANTIGEN	GOBP_ANTIGEN_PROCESSING_AND_PRESENTATION_OF_PEPTIDE_ANTIGEN	GOBP_ANTIGEN_PROCESSING_AND_PRESENTATION_OF_PEPTIDE_ANTIGEN	5/131	30/5089	0.000889234	0.0149957	0.0119983	Ctsl/B2m/H2-D1/H2-Q10/Azgp1	5	GO BP	up	NP
GOBP_OLEFINIC_COMPOUND_METABOLIC_PROCESS	GOBP_OLEFINIC_COMPOUND_METABOLIC_PROCESS	GOBP_OLEFINIC_COMPOUND_METABOLIC_PROCESS	7/131	62/5089	0.000965141	0.0155682	0.0124563	Ttr/Rbp4/Cyp3a11/Cyp2e1/Scp2/Akr1c6/Gpx1	7	GO BP	up	NP
GOBP_REGULATION_OF_PLASMA_LIPOPROTEIN_PARTICLE_LEVELS	GOBP_REGULATION_OF_PLASMA_LIPOPROTEIN_PARTICLE_LEVELS	GOBP_REGULATION_OF_PLASMA_LIPOPROTEIN_PARTICLE_LEVELS	6/131	46/5089	0.00104329	0.0160325	0.0128278	Apoa2/Apoe/Apoa1/Apoc1/Apoc3/Apoa5	6	GO BP	up	NP
GOBP_CELLULAR_KETONE_METABOLIC_PROCESS	GOBP_CELLULAR_KETONE_METABOLIC_PROCESS	GOBP_CELLULAR_KETONE_METABOLIC_PROCESS	10/131	122/5089	0.00108036	0.0160325	0.0128278	Fabp1/Apoa1/Apoc1/Apoc3/Bhmt/Tdo2/Rgn/Akr1c6/Appl2/Apoa5	10	GO BP	up	NP
GOBP_MULTICELLULAR_ORGANISMAL_HOMEOSTASIS	GOBP_MULTICELLULAR_ORGANISMAL_HOMEOSTASIS	GOBP_MULTICELLULAR_ORGANISMAL_HOMEOSTASIS	15/131	240/5089	0.00115816	0.016526	0.0132227	Alb/Scd1/Rbp4/Trf/Hamp/Ubb/Serpina3k/B2m/Cebpb/G0s2/Azgp1/Cd38/Appl2/Arrdc3/Gpx1	15	GO BP	up	NP
GOBP_ADAPTIVE_IMMUNE_RESPONSE	GOBP_ADAPTIVE_IMMUNE_RESPONSE	GOBP_ADAPTIVE_IMMUNE_RESPONSE	12/131	173/5089	0.00152119	0.0209023	0.0167242	Fgb/Cd81/C1qa/Ctsl/B2m/H2-D1/C8g/C1qc/H2-Q10/Azgp1/Cd55/Fga	12	GO BP	up	NP
GOBP_REGULATION_OF_BODY_FLUID_LEVELS	GOBP_REGULATION_OF_BODY_FLUID_LEVELS	GOBP_REGULATION_OF_BODY_FLUID_LEVELS	12/131	179/5089	0.00203527	0.0269673	0.0215769	Apoe/Serpina1b/Fgb/Fgg/Apoh/Serpina1e/F2/Plg/mt-Co2/Fga/Serpinc1/Ppia	12	GO BP	up	NP
GOBP_REGULATION_OF_PRODUCTION_OF_MOLECULAR_MEDIATOR_OF_IMMUNE_RESPONSE	GOBP_REGULATION_OF_PRODUCTION_OF_MOLECULAR_MEDIATOR_OF_IMMUNE_RESPONSE	GOBP_REGULATION_OF_PRODUCTION_OF_MOLECULAR_MEDIATOR_OF_IMMUNE_RESPONSE	7/131	72/5089	0.00233651	0.0298912	0.0239163	Apoa2/Apoa1/Rbp4/Cd81/B2m/H2-Q10/Cd55	7	GO BP	up	NP
GOBP_MAINTENANCE_OF_LOCATION_IN_CELL	GOBP_MAINTENANCE_OF_LOCATION_IN_CELL	GOBP_MAINTENANCE_OF_LOCATION_IN_CELL	8/131	93/5089	0.00252539	0.0310867	0.0248729	Alb/Apoe/Tmsb4x/Fth1/Hspa5/F2/Chchd10/Ank2	8	GO BP	up	NP
GOBP_REGULATION_OF_SYSTEM_PROCESS	GOBP_REGULATION_OF_SYSTEM_PROCESS	GOBP_REGULATION_OF_SYSTEM_PROCESS	13/131	209/5089	0.00259754	0.0310867	0.0248729	Apoa2/Apoe/Apoa1/Fgb/Fgg/Hamp/Mef2a/Cyp8b1/Pten/Cd38/Apoa5/Fga/Ank2	13	GO BP	up	NP
GOBP_RESPONSE_TO_XENOBIOTIC_STIMULUS	GOBP_RESPONSE_TO_XENOBIOTIC_STIMULUS	GOBP_RESPONSE_TO_XENOBIOTIC_STIMULUS	12/131	185/5089	0.00268432	0.0311214	0.0249006	Apoa2/Gsta3/Cyp3a11/Cat/Cyp2e1/Hspa5/Ass1/Otc/Cd38/Txnip/Gpx1/Hsp90ab1	12	GO BP	up	NP
GOBP_EPITHELIAL_CELL_PROLIFERATION	GOBP_EPITHELIAL_CELL_PROLIFERATION	GOBP_EPITHELIAL_CELL_PROLIFERATION	12/131	186/5089	0.00280734	0.0315613	0.0252526	Apoe/Apoa1/Apoh/Rgn/B2m/Rida/Cebpb/Zfp36l1/Mtss1/Pten/Zfp36/Gpx1	12	GO BP	up	NP
GOBP_DETOXIFICATION	GOBP_DETOXIFICATION	GOBP_DETOXIFICATION	6/131	57/5089	0.00320864	0.0342499	0.0274038	Alb/Fabp1/Apoe/Mgst1/Cat/Gpx1	6	GO BP	up	NP
GOBP_RESPONSE_TO_OXIDATIVE_STRESS	GOBP_RESPONSE_TO_OXIDATIVE_STRESS	GOBP_RESPONSE_TO_OXIDATIVE_STRESS	14/131	240/5089	0.00323112	0.0342499	0.0274038	Fabp1/Apoe/Mgst1/Car3/Selenop/Chchd2/Cat/Cyp2e1/Gjb2/Cd38/Klf2/Txnip/Gpx1/Ppia	14	GO BP	up	NP
GOBP_BIOLOGICAL_PROCESS_INVOLVED_IN_SYMBIOTIC_INTERACTION	GOBP_BIOLOGICAL_PROCESS_INVOLVED_IN_SYMBIOTIC_INTERACTION	GOBP_BIOLOGICAL_PROCESS_INVOLVED_IN_SYMBIOTIC_INTERACTION	10/131	142/5089	0.00337025	0.0347323	0.0277898	Apoe/Cd81/Ctsl/Slc3a2/F2/Plg/Cd55/Gpx1/Ppia/Hsp90ab1	10	GO BP	up	NP
GOBP_ORGANIC_HYDROXY_COMPOUND_METABOLIC_PROCESS	GOBP_ORGANIC_HYDROXY_COMPOUND_METABOLIC_PROCESS	GOBP_ORGANIC_HYDROXY_COMPOUND_METABOLIC_PROCESS	15/131	272/5089	0.00395236	0.0396304	0.0317088	Ttr/Apoa2/Apoe/Apoa1/Rbp4/Gc/Cyp3a11/Cat/Cyp2e1/Scp2/Ddt/Cyp8b1/Pten/Akr1c6/Apoa5	15	GO BP	up	NP
GOBP_LEUKOCYTE_PROLIFERATION	GOBP_LEUKOCYTE_PROLIFERATION	GOBP_LEUKOCYTE_PROLIFERATION	9/131	127/5089	0.0051416	0.0501983	0.0401643	Vcam1/Cd81/Vsig4/Csf2ra/Cebpb/Ccnd3/H2-Q10/Cd38/Cd55	9	GO BP	up	NP
GOBP_PLATELET_ACTIVATION	GOBP_PLATELET_ACTIVATION	GOBP_PLATELET_ACTIVATION	6/131	63/5089	0.00529928	0.0504111	0.0403346	Apoe/Fgb/Fgg/F2/Fga/Ppia	6	GO BP	up	NP
GOBP_LEUKOCYTE_MEDIATED_CYTOTOXICITY	GOBP_LEUKOCYTE_MEDIATED_CYTOTOXICITY	GOBP_LEUKOCYTE_MEDIATED_CYTOTOXICITY	5/131	45/5089	0.00560204	0.0519589	0.041573	B2m/F2/H2-D1/H2-Q10/Azgp1	5	GO BP	up	NP
GOBP_ACTIVATION_OF_IMMUNE_RESPONSE	GOBP_ACTIVATION_OF_IMMUNE_RESPONSE	GOBP_ACTIVATION_OF_IMMUNE_RESPONSE	10/131	154/5089	0.00599904	0.054284	0.0434334	Cd81/C1qa/Vsig4/C8g/C1qc/H2-Q10/Cd38/Cfh/Cd55/Appl2	10	GO BP	up	NP
GOBP_ANATOMICAL_STRUCTURE_HOMEOSTASIS	GOBP_ANATOMICAL_STRUCTURE_HOMEOSTASIS	GOBP_ANATOMICAL_STRUCTURE_HOMEOSTASIS	9/131	133/5089	0.00693674	0.0612746	0.0490266	Alb/Rbp4/Trf/Hamp/Serpina3k/B2m/Azgp1/Plg/Cd38	9	GO BP	up	NP
GOBP_LEUKOCYTE_MEDIATED_IMMUNITY	GOBP_LEUKOCYTE_MEDIATED_IMMUNITY	GOBP_LEUKOCYTE_MEDIATED_IMMUNITY	10/131	159/5089	0.00748054	0.0645414	0.0516405	Cd81/C1qa/B2m/F2/H2-D1/C8g/C1qc/H2-Q10/Azgp1/Cd55	10	GO BP	up	NP
GOBP_MAINTENANCE_OF_LOCATION	GOBP_MAINTENANCE_OF_LOCATION	GOBP_MAINTENANCE_OF_LOCATION	10/131	161/5089	0.00814689	0.0686931	0.0549623	Alb/Apoe/Apoa1/Tmsb4x/Fth1/Apoc4/Hspa5/F2/Chchd10/Ank2	10	GO BP	up	NP
GOBP_REGULATION_OF_CELL_ACTIVATION	GOBP_REGULATION_OF_CELL_ACTIVATION	GOBP_REGULATION_OF_CELL_ACTIVATION	13/131	242/5089	0.00893611	0.0728669	0.0583018	Apoe/Vcam1/Fgg/Cd81/Hamp/Vsig4/B2m/Cebpb/F2/Zfp36l1/H2-Q10/Cd38/Cd55	13	GO BP	up	NP
GOBP_PRODUCTION_OF_MOLECULAR_MEDIATOR_OF_IMMUNE_RESPONSE	GOBP_PRODUCTION_OF_MOLECULAR_MEDIATOR_OF_IMMUNE_RESPONSE	GOBP_PRODUCTION_OF_MOLECULAR_MEDIATOR_OF_IMMUNE_RESPONSE	7/131	92/5089	0.00909401	0.0728669	0.0583018	Apoa2/Apoa1/Rbp4/Cd81/B2m/H2-Q10/Cd55	7	GO BP	up	NP
GOBP_REGULATION_OF_SMALL_MOLECULE_METABOLIC_PROCESS	GOBP_REGULATION_OF_SMALL_MOLECULE_METABOLIC_PROCESS	GOBP_REGULATION_OF_SMALL_MOLECULE_METABOLIC_PROCESS	11/131	190/5089	0.00935023	0.0728669	0.0583018	Fabp1/Apoe/Apoa1/Tmsb4x/Apoc1/Apoc3/Bhmt/Rgn/mt-Co2/Appl2/Apoa5	11	GO BP	up	NP
GOBP_ANTIGEN_PROCESSING_AND_PRESENTATION	GOBP_ANTIGEN_PROCESSING_AND_PRESENTATION	GOBP_ANTIGEN_PROCESSING_AND_PRESENTATION	5/131	51/5089	0.00952891	0.0728669	0.0583018	Ctsl/B2m/H2-D1/H2-Q10/Azgp1	5	GO BP	up	NP
GOBP_TISSUE_REGENERATION	GOBP_TISSUE_REGENERATION	GOBP_TISSUE_REGENERATION	4/131	33/5089	0.00962393	0.0728669	0.0583018	Cd81/Plg/Apoa5/Gpx1	4	GO BP	up	NP
GOBP_REGULATION_OF_PROTEIN_STABILITY	GOBP_REGULATION_OF_PROTEIN_STABILITY	GOBP_REGULATION_OF_PROTEIN_STABILITY	11/131	194/5089	0.0108458	0.0804761	0.0643901	Apoa2/Apoa1/Trf/Cd81/Ctnnd1/Rps7/Rpl23/Pten/Rpl11/Ank2/Hsp90ab1	11	GO BP	up	NP
GOBP_RETINOL_METABOLIC_PROCESS	GOBP_RETINOL_METABOLIC_PROCESS	GOBP_RETINOL_METABOLIC_PROCESS	3/131	19/5089	0.0119463	0.0856117	0.0684991	Ttr/Rbp4/Cyp3a11	3	GO BP	up	NP
GOBP_MYELOID_CELL_HOMEOSTASIS	GOBP_MYELOID_CELL_HOMEOSTASIS	GOBP_MYELOID_CELL_HOMEOSTASIS	7/131	97/5089	0.0119995	0.0856117	0.0684991	Hamp/B2m/Mafb/Rps14/Zfp36l1/Zfp36/Klf2	7	GO BP	up	NP
GOBP_REACTIVE_NITROGEN_SPECIES_METABOLIC_PROCESS	GOBP_REACTIVE_NITROGEN_SPECIES_METABOLIC_PROCESS	GOBP_REACTIVE_NITROGEN_SPECIES_METABOLIC_PROCESS	4/131	36/5089	0.0130579	0.091405	0.0731344	Rgn/Ass1/Klf2/Hsp90ab1	4	GO BP	up	NP
GOBP_RESPONSE_TO_NUTRIENT	GOBP_RESPONSE_TO_NUTRIENT	GOBP_RESPONSE_TO_NUTRIENT	6/131	78/5089	0.0146592	0.100714	0.0805828	Vcam1/Hamp/Cat/Ass1/Otc/Gpx1	6	GO BP	up	NP
GOBP_RESPONSE_TO_FLUID_SHEAR_STRESS	GOBP_RESPONSE_TO_FLUID_SHEAR_STRESS	GOBP_RESPONSE_TO_FLUID_SHEAR_STRESS	3/131	21/5089	0.0157955	0.106548	0.0852504	Ass1/Mtss1/Klf2	3	GO BP	up	NP
GOBP_ERYTHROCYTE_HOMEOSTASIS	GOBP_ERYTHROCYTE_HOMEOSTASIS	GOBP_ERYTHROCYTE_HOMEOSTASIS	6/131	81/5089	0.0174054	0.115311	0.0922615	B2m/Mafb/Rps14/Zfp36l1/Zfp36/Klf2	6	GO BP	up	NP
GOBP_REGULATION_OF_TISSUE_REMODELING	GOBP_REGULATION_OF_TISSUE_REMODELING	GOBP_REGULATION_OF_TISSUE_REMODELING	4/131	40/5089	0.0187266	0.120473	0.0963918	Trf/Hamp/Cd38/Cst3	4	GO BP	up	NP
GOBP_RESPONSE_TO_TOXIC_SUBSTANCE	GOBP_RESPONSE_TO_TOXIC_SUBSTANCE	GOBP_RESPONSE_TO_TOXIC_SUBSTANCE	7/131	106/5089	0.018834	0.120473	0.0963918	Alb/Fabp1/Apoe/Mgst1/Cat/Ass1/Gpx1	7	GO BP	up	NP
GOBP_RESPONSE_TO_OXYGEN_LEVELS	GOBP_RESPONSE_TO_OXYGEN_LEVELS	GOBP_RESPONSE_TO_OXYGEN_LEVELS	9/131	157/5089	0.0192425	0.121	0.0968134	Fabp1/Vcam1/Chchd2/Cat/mt-Nd4/Zfp36l1/mt-Atp6/Pten/Cd38	9	GO BP	up	NP
GOBP_REGULATION_OF_VESICLE_MEDIATED_TRANSPORT	GOBP_REGULATION_OF_VESICLE_MEDIATED_TRANSPORT	GOBP_REGULATION_OF_VESICLE_MEDIATED_TRANSPORT	13/131	268/5089	0.019695	0.121781	0.0974386	Apoa2/Apoe/Apoa1/Trf/Apoc1/Apoc3/Fgb/Fgg/B2m/Ahsg/Appl2/Apoa5/Fga	13	GO BP	up	NP
GOBP_INTERLEUKIN_6_PRODUCTION	GOBP_INTERLEUKIN_6_PRODUCTION	GOBP_INTERLEUKIN_6_PRODUCTION	5/131	62/5089	0.0209928	0.127678	0.102157	Cebpb/H2-D1/Orm1/H2-Q10/Klf2	5	GO BP	up	NP
GOBP_ANTIGEN_PROCESSING_AND_PRESENTATION_OF_EXOGENOUS_ANTIGEN	GOBP_ANTIGEN_PROCESSING_AND_PRESENTATION_OF_EXOGENOUS_ANTIGEN	GOBP_ANTIGEN_PROCESSING_AND_PRESENTATION_OF_EXOGENOUS_ANTIGEN	3/131	24/5089	0.0227315	0.129732	0.1038	Ctsl/B2m/H2-Q10	3	GO BP	up	NP
GOBP_HYDROGEN_PEROXIDE_METABOLIC_PROCESS	GOBP_HYDROGEN_PEROXIDE_METABOLIC_PROCESS	GOBP_HYDROGEN_PEROXIDE_METABOLIC_PROCESS	3/131	24/5089	0.0227315	0.129732	0.1038	Cat/mt-Co2/Gpx1	3	GO BP	up	NP
GOBP_MITOCHONDRION_LOCALIZATION	GOBP_MITOCHONDRION_LOCALIZATION	GOBP_MITOCHONDRION_LOCALIZATION	3/131	24/5089	0.0227315	0.129732	0.1038	Alb/Ubb/Mef2a	3	GO BP	up	NP
GOBP_SECONDARY_METABOLIC_PROCESS	GOBP_SECONDARY_METABOLIC_PROCESS	GOBP_SECONDARY_METABOLIC_PROCESS	3/131	24/5089	0.0227315	0.129732	0.1038	Cyp3a11/Ddt/Akr1c6	3	GO BP	up	NP
GOBP_REGULATION_OF_TRANSMEMBRANE_TRANSPORT	GOBP_REGULATION_OF_TRANSMEMBRANE_TRANSPORT	GOBP_REGULATION_OF_TRANSMEMBRANE_TRANSPORT	10/131	189/5089	0.023079	0.129732	0.1038	Tmsb4x/Hamp/Kcnj16/Rgn/Mef2a/Ndufa4/F2/Oaz1/Appl2/Ank2	10	GO BP	up	NP
GOBP_ALCOHOL_METABOLIC_PROCESS	GOBP_ALCOHOL_METABOLIC_PROCESS	GOBP_ALCOHOL_METABOLIC_PROCESS	10/131	190/5089	0.0238417	0.132019	0.10563	Ttr/Apoa2/Apoe/Apoa1/Rbp4/Cyp3a11/Cat/Pten/Akr1c6/Apoa5	10	GO BP	up	NP
GOBP_RESPONSE_TO_EXTRACELLULAR_STIMULUS	GOBP_RESPONSE_TO_EXTRACELLULAR_STIMULUS	GOBP_RESPONSE_TO_EXTRACELLULAR_STIMULUS	12/131	247/5089	0.0244197	0.133231	0.1066	Alb/Apoe/Vcam1/Hamp/Cat/Hspa5/Cyp8b1/Ass1/Zfp36/Otc/Appl2/Gpx1	12	GO BP	up	NP
GOBP_COLLAGEN_CATABOLIC_PROCESS	GOBP_COLLAGEN_CATABOLIC_PROCESS	GOBP_COLLAGEN_CATABOLIC_PROCESS	2/131	5089-10-01	0.0258482	0.138981	0.111201	Ctsl/Cst3	2	GO BP	up	NP
GOBP_CELLULAR_RESPONSE_TO_BIOTIC_STIMULUS	GOBP_CELLULAR_RESPONSE_TO_BIOTIC_STIMULUS	GOBP_CELLULAR_RESPONSE_TO_BIOTIC_STIMULUS	7/131	117/5089	0.0304308	0.160081	0.128083	Hamp/Hspa5/Cebpb/Ass1/Zfp36/Cd55/Txnip	7	GO BP	up	NP
GOBP_PROTEIN_REFOLDING	GOBP_PROTEIN_REFOLDING	GOBP_PROTEIN_REFOLDING	2/131	5089-11-01	0.0310669	0.160081	0.128083	B2m/Hspa5	2	GO BP	up	NP
GOBP_RESPONSE_TO_HYPEROXIA	GOBP_RESPONSE_TO_HYPEROXIA	GOBP_RESPONSE_TO_HYPEROXIA	2/131	5089-11-01	0.0310669	0.160081	0.128083	Cat/mt-Atp6	2	GO BP	up	NP
GOBP_INORGANIC_ION_TRANSMEMBRANE_TRANSPORT	GOBP_INORGANIC_ION_TRANSMEMBRANE_TRANSPORT	GOBP_INORGANIC_ION_TRANSMEMBRANE_TRANSPORT	13/131	288/5089	0.0331253	0.168349	0.134698	Tmsb4x/Hamp/Kcnj16/Rgn/mt-Nd4/Slc3a2/Ndufa4/F2/Cox8a/mt-Atp6/mt-Co2/Ank2/Pkd2l2	13	GO BP	up	NP
GOBP_FEMALE_SEX_DIFFERENTIATION	GOBP_FEMALE_SEX_DIFFERENTIATION	GOBP_FEMALE_SEX_DIFFERENTIATION	4/131	48/5089	0.0340958	0.169708	0.135786	Rbp4/Ubb/Hspa5/Cebpb	4	GO BP	up	NP
GOBP_ION_HOMEOSTASIS	GOBP_ION_HOMEOSTASIS	GOBP_ION_HOMEOSTASIS	13/131	290/5089	0.034764	0.169708	0.135786	Apoe/Trf/Fth1/Hamp/Rgn/B2m/Tpt1/F2/Herpud1/Otc/Cd38/Cd55/Ank2	13	GO BP	up	NP
GOBP_REGULATION_OF_ANATOMICAL_STRUCTURE_SIZE	GOBP_REGULATION_OF_ANATOMICAL_STRUCTURE_SIZE	GOBP_REGULATION_OF_ANATOMICAL_STRUCTURE_SIZE	11/131	231/5089	0.0347651	0.169708	0.135786	Apoe/Tmsb4x/Fgb/Fgg/Ssh2/Pten/Cd38/Klf2/Fga/Gpx1/Hsp90ab1	11	GO BP	up	NP
GOBP_LIPID_HOMEOSTASIS	GOBP_LIPID_HOMEOSTASIS	GOBP_LIPID_HOMEOSTASIS	6/131	96/5089	0.0364795	0.175765	0.140632	Apoa2/Apoe/Apoa1/Apoc3/Apoc4/Apoa5	6	GO BP	up	NP
GOBP_BIOLOGICAL_PROCESS_INVOLVED_IN_INTERACTION_WITH_SYMBIONT	GOBP_BIOLOGICAL_PROCESS_INVOLVED_IN_INTERACTION_WITH_SYMBIONT	GOBP_BIOLOGICAL_PROCESS_INVOLVED_IN_INTERACTION_WITH_SYMBIONT	4/131	50/5089	0.0388137	0.184614	0.147712	Apoe/F2/Plg/Gpx1	4	GO BP	up	NP
GOBP_TEMPERATURE_HOMEOSTASIS	GOBP_TEMPERATURE_HOMEOSTASIS	GOBP_TEMPERATURE_HOMEOSTASIS	6/131	99/5089	0.0414573	0.189335	0.15149	Scd1/Cebpb/G0s2/Appl2/Arrdc3/Gpx1	6	GO BP	up	NP
GOBP_CELLULAR_AMINO_ACID_METABOLIC_PROCESS	GOBP_CELLULAR_AMINO_ACID_METABOLIC_PROCESS	GOBP_CELLULAR_AMINO_ACID_METABOLIC_PROCESS	9/131	180/5089	0.0415225	0.189335	0.15149	Bhmt/Ttc36/Tdo2/Rida/Cth/Ass1/Sephs2/Mat1a/Otc	9	GO BP	up	NP
GOBP_S_ADENOSYLMETHIONINE_METABOLIC_PROCESS	GOBP_S_ADENOSYLMETHIONINE_METABOLIC_PROCESS	GOBP_S_ADENOSYLMETHIONINE_METABOLIC_PROCESS	2/131	13/5089	0.0426098	0.189335	0.15149	Bhmt/Mat1a	2	GO BP	up	NP
GOBP_TOLERANCE_INDUCTION	GOBP_TOLERANCE_INDUCTION	GOBP_TOLERANCE_INDUCTION	2/131	13/5089	0.0426098	0.189335	0.15149	H2-D1/H2-Q10	2	GO BP	up	NP
GOBP_HOMEOSTASIS_OF_NUMBER_OF_CELLS	GOBP_HOMEOSTASIS_OF_NUMBER_OF_CELLS	GOBP_HOMEOSTASIS_OF_NUMBER_OF_CELLS	8/131	153/5089	0.0427169	0.189335	0.15149	Hamp/Tsc22d3/B2m/Mafb/Rps14/Zfp36l1/Zfp36/Klf2	8	GO BP	up	NP
GOBP_ENDOCYTOSIS	GOBP_ENDOCYTOSIS	GOBP_ENDOCYTOSIS	13/131	299/5089	0.0428684	0.189335	0.15149	Apoe/Trf/Apoc1/Apoc3/Cd81/Ctsl/Cd163/B2m/Colec12/Ahsg/Appl2/Apoa5/Ank2	13	GO BP	up	NP
GOBP_MYELOID_LEUKOCYTE_MIGRATION	GOBP_MYELOID_LEUKOCYTE_MIGRATION	GOBP_MYELOID_LEUKOCYTE_MIGRATION	5/131	77/5089	0.0473827	0.2038	0.163063	Cd81/Ddt/Dusp1/Rarres2/Ppia	5	GO BP	up	NP
GOBP_TISSUE_REMODELING	GOBP_TISSUE_REMODELING	GOBP_TISSUE_REMODELING	5/131	77/5089	0.0473827	0.2038	0.163063	Trf/Hamp/Plg/Cd38/Cst3	5	GO BP	up	NP
GOBP_RESPONSE_TO_ANTIBIOTIC	GOBP_RESPONSE_TO_ANTIBIOTIC	GOBP_RESPONSE_TO_ANTIBIOTIC	3/131	32/5089	0.0480465	0.2038	0.163063	Hspa5/Rpl23/Gjb2	3	GO BP	up	NP
GOBP_REGULATION_OF_LIPOPROTEIN_PARTICLE_CLEARANCE	GOBP_REGULATION_OF_LIPOPROTEIN_PARTICLE_CLEARANCE	GOBP_REGULATION_OF_LIPOPROTEIN_PARTICLE_CLEARANCE	2/131	14/5089	0.0488899	0.2038	0.163063	Apoc1/Apoc3	2	GO BP	up	NP
GOBP_RESPONSE_TO_FUNGUS	GOBP_RESPONSE_TO_FUNGUS	GOBP_RESPONSE_TO_FUNGUS	2/131	14/5089	0.0488899	0.2038	0.163063	Hamp/Rarres2	2	GO BP	up	NP
GOBP_COLLAGEN_METABOLIC_PROCESS	GOBP_COLLAGEN_METABOLIC_PROCESS	GOBP_COLLAGEN_METABOLIC_PROCESS	3/131	33/5089	0.0518888	0.213897	0.171142	Ctsl/F2/Cst3	3	GO BP	up	NP
GOBP_REGULATION_OF_HEMOPOIESIS	GOBP_REGULATION_OF_HEMOPOIESIS	GOBP_REGULATION_OF_HEMOPOIESIS	8/131	161/5089	0.0547685	0.218208	0.174591	B2m/Mafb/Cebpb/Zfp36l1/H2-D1/C1qc/H2-Q10/Zfp36	8	GO BP	up	NP
GOBP_DETECTION_OF_STIMULUS	GOBP_DETECTION_OF_STIMULUS	GOBP_DETECTION_OF_STIMULUS	4/131	56/5089	0.0551007	0.218208	0.174591	H2-D1/H2-Q10/Azgp1/Pkd2l2	4	GO BP	up	NP
GOBP_ANTIGEN_PROCESSING_AND_PRESENTATION_OF_PEPTIDE_OR_POLYSACCHARIDE_ANTIGEN_VIA_MHC_CLASS_II	GOBP_ANTIGEN_PROCESSING_AND_PRESENTATION_OF_PEPTIDE_OR_POLYSACCHARIDE_ANTIGEN_VIA_MHC_CLASS_II	GOBP_ANTIGEN_PROCESSING_AND_PRESENTATION_OF_PEPTIDE_OR_POLYSACCHARIDE_ANTIGEN_VIA_MHC_CLASS_II	2/131	15/5089	0.0554812	0.218208	0.174591	Ctsl/B2m	2	GO BP	up	NP
GOBP_RESPONSE_TO_ELECTRICAL_STIMULUS	GOBP_RESPONSE_TO_ELECTRICAL_STIMULUS	GOBP_RESPONSE_TO_ELECTRICAL_STIMULUS	2/131	15/5089	0.0554812	0.218208	0.174591	Pten/Btg2	2	GO BP	up	NP
GOBP_MAINTENANCE_OF_PROTEIN_LOCATION_IN_CELL	GOBP_MAINTENANCE_OF_PROTEIN_LOCATION_IN_CELL	GOBP_MAINTENANCE_OF_PROTEIN_LOCATION_IN_CELL	3/131	34/5089	0.0558754	0.218208	0.174591	Tmsb4x/Hspa5/Chchd10	3	GO BP	up	NP
GOBP_LEUKOCYTE_MIGRATION	GOBP_LEUKOCYTE_MIGRATION	GOBP_LEUKOCYTE_MIGRATION	7/131	136/5089	0.060263	0.232891	0.18634	Vcam1/Cd81/Ddt/Dusp1/Rarres2/Plg/Ppia	7	GO BP	up	NP
GOBP_CELLULAR_MODIFIED_AMINO_ACID_METABOLIC_PROCESS	GOBP_CELLULAR_MODIFIED_AMINO_ACID_METABOLIC_PROCESS	GOBP_CELLULAR_MODIFIED_AMINO_ACID_METABOLIC_PROCESS	5/131	83/5089	0.0617577	0.236092	0.1889	Bhmt/Gsta3/Ass1/Gamt/Gpx1	5	GO BP	up	NP
GOBP_DETECTION_OF_BIOTIC_STIMULUS	GOBP_DETECTION_OF_BIOTIC_STIMULUS	GOBP_DETECTION_OF_BIOTIC_STIMULUS	2/131	16/5089	0.0623638	0.236092	0.1889	H2-D1/H2-Q10	2	GO BP	up	NP
GOBP_REGULATION_OF_RESPONSE_TO_BIOTIC_STIMULUS	GOBP_REGULATION_OF_RESPONSE_TO_BIOTIC_STIMULUS	GOBP_REGULATION_OF_RESPONSE_TO_BIOTIC_STIMULUS	8/131	167/5089	0.0651145	0.244015	0.195239	Apoe/Vsig4/H2-D1/H2-Q10/Cfh/Cd55/Appl2/Hsp90ab1	8	GO BP	up	NP
GOBP_INTERLEUKIN_1_PRODUCTION	GOBP_INTERLEUKIN_1_PRODUCTION	GOBP_INTERLEUKIN_1_PRODUCTION	3/131	37/5089	0.0686761	0.252857	0.202314	Apoa1/Usp50/Orm1	3	GO BP	up	NP
GOBP_REGULATION_OF_BEHAVIOR	GOBP_REGULATION_OF_BEHAVIOR	GOBP_REGULATION_OF_BEHAVIOR	2/131	17/5089	0.0695185	0.252857	0.202314	Apoe/Arrdc3	2	GO BP	up	NP
GOBP_REGULATION_OF_COLLAGEN_METABOLIC_PROCESS	GOBP_REGULATION_OF_COLLAGEN_METABOLIC_PROCESS	GOBP_REGULATION_OF_COLLAGEN_METABOLIC_PROCESS	2/131	17/5089	0.0695185	0.252857	0.202314	F2/Cst3	2	GO BP	up	NP
GOBP_MUSCLE_STRUCTURE_DEVELOPMENT	GOBP_MUSCLE_STRUCTURE_DEVELOPMENT	GOBP_MUSCLE_STRUCTURE_DEVELOPMENT	11/131	262/5089	0.0733057	0.264043	0.211264	Cd81/Hamp/Id3/Mef2a/Cth/Zfp36l1/Ass1/Plg/Btg2/Ank2/Gpx1	11	GO BP	up	NP
GOBP_ANDROGEN_METABOLIC_PROCESS	GOBP_ANDROGEN_METABOLIC_PROCESS	GOBP_ANDROGEN_METABOLIC_PROCESS	2/131	18/5089	0.0769271	0.269245	0.215426	Cyp3a11/Akr1c6	2	GO BP	up	NP
GOBP_CELL_CELL_RECOGNITION	GOBP_CELL_CELL_RECOGNITION	GOBP_CELL_CELL_RECOGNITION	2/131	18/5089	0.0769271	0.269245	0.215426	Cd81/Fetub	2	GO BP	up	NP
GOBP_CYTOKINE_PRODUCTION_INVOLVED_IN_INFLAMMATORY_RESPONSE	GOBP_CYTOKINE_PRODUCTION_INVOLVED_IN_INFLAMMATORY_RESPONSE	GOBP_CYTOKINE_PRODUCTION_INVOLVED_IN_INFLAMMATORY_RESPONSE	2/131	18/5089	0.0769271	0.269245	0.215426	F2/Appl2	2	GO BP	up	NP
GOBP_RESPONSE_TO_OSMOTIC_STRESS	GOBP_RESPONSE_TO_OSMOTIC_STRESS	GOBP_RESPONSE_TO_OSMOTIC_STRESS	3/131	39/5089	0.0778831	0.270043	0.216065	Tsc22d3/Zfp36l1/Hsp90ab1	3	GO BP	up	NP
GOBP_BONE_REMODELING	GOBP_BONE_REMODELING	GOBP_BONE_REMODELING	3/131	40/5089	0.0826796	0.28402	0.227248	Trf/Hamp/Cd38	3	GO BP	up	NP
GOBP_ONE_CARBON_METABOLIC_PROCESS	GOBP_ONE_CARBON_METABOLIC_PROCESS	GOBP_ONE_CARBON_METABOLIC_PROCESS	2/131	19/5089	0.0845719	0.28715	0.229752	Car3/Mat1a	2	GO BP	up	NP
GOBP_CIRCULATORY_SYSTEM_PROCESS	GOBP_CIRCULATORY_SYSTEM_PROCESS	GOBP_CIRCULATORY_SYSTEM_PROCESS	10/131	238/5089	0.0851388	0.28715	0.229752	Apoe/Fgb/Fgg/Mef2a/Plg/Cd38/Klf2/Fga/Ank2/Gpx1	10	GO BP	up	NP
GOBP_REGULATION_OF_HORMONE_LEVELS	GOBP_REGULATION_OF_HORMONE_LEVELS	GOBP_REGULATION_OF_HORMONE_LEVELS	9/131	208/5089	0.08658	0.28938	0.231537	Ttr/Rbp4/Fgb/Fgg/Ctsl/Cyp3a11/Akr1c6/Cd38/Fga	9	GO BP	up	NP
GOBP_LOCOMOTORY_BEHAVIOR	GOBP_LOCOMOTORY_BEHAVIOR	GOBP_LOCOMOTORY_BEHAVIOR	4/131	66/5089	0.0891939	0.295455	0.236397	Apoe/Selenop/Pten/Arrdc3	4	GO BP	up	NP
GOBP_CELLULAR_RESPONSE_TO_LIPOPROTEIN_PARTICLE_STIMULUS	GOBP_CELLULAR_RESPONSE_TO_LIPOPROTEIN_PARTICLE_STIMULUS	GOBP_CELLULAR_RESPONSE_TO_LIPOPROTEIN_PARTICLE_STIMULUS	2/131	20/5089	0.0924361	0.300111	0.240123	Apoe/Cd81	2	GO BP	up	NP
GOBP_RESPONSE_TO_TUMOR_CELL	GOBP_RESPONSE_TO_TUMOR_CELL	GOBP_RESPONSE_TO_TUMOR_CELL	2/131	20/5089	0.0924361	0.300111	0.240123	H2-Q10/Txnip	2	GO BP	up	NP
GOBP_ADAPTIVE_THERMOGENESIS	GOBP_ADAPTIVE_THERMOGENESIS	GOBP_ADAPTIVE_THERMOGENESIS	5/131	94/5089	0.0938352	0.300111	0.240123	Scd1/Cebpb/G0s2/Appl2/Arrdc3	5	GO BP	up	NP
GOBP_HORMONE_METABOLIC_PROCESS	GOBP_HORMONE_METABOLIC_PROCESS	GOBP_HORMONE_METABOLIC_PROCESS	5/131	94/5089	0.0938352	0.300111	0.240123	Ttr/Rbp4/Ctsl/Cyp3a11/Akr1c6	5	GO BP	up	NP
GOBP_BIOLOGICAL_PROCESS_INVOLVED_IN_INTERACTION_WITH_HOST	GOBP_BIOLOGICAL_PROCESS_INVOLVED_IN_INTERACTION_WITH_HOST	GOBP_BIOLOGICAL_PROCESS_INVOLVED_IN_INTERACTION_WITH_HOST	5/131	95/5089	0.0971089	0.302373	0.241933	Cd81/Ctsl/Slc3a2/Cd55/Ppia	5	GO BP	up	NP
GOBP_REGULATION_OF_HORMONE_SECRETION	GOBP_REGULATION_OF_HORMONE_SECRETION	GOBP_REGULATION_OF_HORMONE_SECRETION	5/131	95/5089	0.0971089	0.302373	0.241933	Rbp4/Fgb/Fgg/Cd38/Fga	5	GO BP	up	NP
GOBP_REGULATION_OF_ORGAN_GROWTH	GOBP_REGULATION_OF_ORGAN_GROWTH	GOBP_REGULATION_OF_ORGAN_GROWTH	3/131	43/5089	0.0978025	0.302373	0.241933	Rbp4/Hamp/Pten	3	GO BP	up	NP
GOBP_XENOBIOTIC_METABOLIC_PROCESS	GOBP_XENOBIOTIC_METABOLIC_PROCESS	GOBP_XENOBIOTIC_METABOLIC_PROCESS	3/131	43/5089	0.0978025	0.302373	0.241933	Gsta3/Cyp3a11/Cyp2e1	3	GO BP	up	NP
GOBP_REGULATION_OF_EPIDERMIS_DEVELOPMENT	GOBP_REGULATION_OF_EPIDERMIS_DEVELOPMENT	GOBP_REGULATION_OF_EPIDERMIS_DEVELOPMENT	2/131	21/5089	0.100504	0.308155	0.246559	Zfp36l1/Zfp36	2	GO BP	up	NP
GOBP_VITAMIN_METABOLIC_PROCESS	GOBP_VITAMIN_METABOLIC_PROCESS	GOBP_VITAMIN_METABOLIC_PROCESS	3/131	44/5089	0.103077	0.313455	0.2508	Gc/Cyp3a11/Rgn	3	GO BP	up	NP
GOBP_MULTI_MULTICELLULAR_ORGANISM_PROCESS	GOBP_MULTI_MULTICELLULAR_ORGANISM_PROCESS	GOBP_MULTI_MULTICELLULAR_ORGANISM_PROCESS	4/131	70/5089	0.105122	0.317076	0.253697	Gjb2/Cd38/Hpgd/Ambp	4	GO BP	up	NP
GOBP_HEART_GROWTH	GOBP_HEART_GROWTH	GOBP_HEART_GROWTH	3/131	45/5089	0.108462	0.320234	0.256224	Rbp4/Hamp/Pten	3	GO BP	up	NP
GOBP_LABYRINTHINE_LAYER_DEVELOPMENT	GOBP_LABYRINTHINE_LAYER_DEVELOPMENT	GOBP_LABYRINTHINE_LAYER_DEVELOPMENT	2/131	22/5089	0.108759	0.320234	0.256224	Zfp36l1/Plg	2	GO BP	up	NP
GOBP_MULTICELLULAR_ORGANISMAL_RESPONSE_TO_STRESS	GOBP_MULTICELLULAR_ORGANISMAL_RESPONSE_TO_STRESS	GOBP_MULTICELLULAR_ORGANISMAL_RESPONSE_TO_STRESS	2/131	22/5089	0.108759	0.320234	0.256224	Apoe/Pten	2	GO BP	up	NP
GOBP_RESPONSE_TO_COLD	GOBP_RESPONSE_TO_COLD	GOBP_RESPONSE_TO_COLD	2/131	24/5089	0.125774	0.367418	0.293976	mt-Co2/Appl2	2	GO BP	up	NP
GOBP_RESPONSE_TO_TOPOLOGICALLY_INCORRECT_PROTEIN	GOBP_RESPONSE_TO_TOPOLOGICALLY_INCORRECT_PROTEIN	GOBP_RESPONSE_TO_TOPOLOGICALLY_INCORRECT_PROTEIN	5/131	105/5089	0.132916	0.381961	0.305612	Hspa5/Cth/Manf/Herpud1/Hsp90ab1	5	GO BP	up	NP
GOBP_GLUTATHIONE_METABOLIC_PROCESS	GOBP_GLUTATHIONE_METABOLIC_PROCESS	GOBP_GLUTATHIONE_METABOLIC_PROCESS	2/131	25/5089	0.134506	0.381961	0.305612	Gsta3/Gpx1	2	GO BP	up	NP
GOBP_INTERLEUKIN_2_PRODUCTION	GOBP_INTERLEUKIN_2_PRODUCTION	GOBP_INTERLEUKIN_2_PRODUCTION	2/131	25/5089	0.134506	0.381961	0.305612	Vsig4/Zfp36	2	GO BP	up	NP
GOBP_REGULATION_OF_TRANSPORTER_ACTIVITY	GOBP_REGULATION_OF_TRANSPORTER_ACTIVITY	GOBP_REGULATION_OF_TRANSPORTER_ACTIVITY	5/131	106/5089	0.136789	0.381961	0.305612	Apoa2/Tmsb4x/Rgn/Ndufa4/Ank2	5	GO BP	up	NP
GOBP_CELL_RECOGNITION	GOBP_CELL_RECOGNITION	GOBP_CELL_RECOGNITION	3/131	50/5089	0.13693	0.381961	0.305612	Cd81/Colec12/Fetub	3	GO BP	up	NP
GOBP_MAINTENANCE_OF_PROTEIN_LOCATION	GOBP_MAINTENANCE_OF_PROTEIN_LOCATION	GOBP_MAINTENANCE_OF_PROTEIN_LOCATION	3/131	50/5089	0.13693	0.381961	0.305612	Tmsb4x/Hspa5/Chchd10	3	GO BP	up	NP
GOBP_LEUKOCYTE_CHEMOTAXIS	GOBP_LEUKOCYTE_CHEMOTAXIS	GOBP_LEUKOCYTE_CHEMOTAXIS	4/131	78/5089	0.140496	0.388985	0.311232	Ddt/Dusp1/Rarres2/Ppia	4	GO BP	up	NP
GOBP_ENDOPLASMIC_RETICULUM_UNFOLDED_PROTEIN_RESPONSE	GOBP_ENDOPLASMIC_RETICULUM_UNFOLDED_PROTEIN_RESPONSE	GOBP_ENDOPLASMIC_RETICULUM_UNFOLDED_PROTEIN_RESPONSE	3/131	51/5089	0.142906	0.392727	0.314226	Hspa5/Cth/Herpud1	3	GO BP	up	NP
GOBP_REGULATION_OF_LEUKOCYTE_MIGRATION	GOBP_REGULATION_OF_LEUKOCYTE_MIGRATION	GOBP_REGULATION_OF_LEUKOCYTE_MIGRATION	4/131	79/5089	0.14522	0.393501	0.314845	Cd81/Ddt/Dusp1/Rarres2	4	GO BP	up	NP
GOBP_BEHAVIOR	GOBP_BEHAVIOR	GOBP_BEHAVIOR	8/131	201/5089	0.145309	0.393501	0.314845	Apoe/Selenop/Ttc36/B2m/Cebpb/Pten/Btg2/Arrdc3	8	GO BP	up	NP
GOBP_SMALL_MOLECULE_CATABOLIC_PROCESS	GOBP_SMALL_MOLECULE_CATABOLIC_PROCESS	GOBP_SMALL_MOLECULE_CATABOLIC_PROCESS	9/131	234/5089	0.147557	0.396694	0.3174	Fabp1/Apoe/Tdo2/Cyp3a11/Rida/Scp2/Pten/Mat1a/Otc	9	GO BP	up	NP
GOBP_INFLAMMATORY_RESPONSE_TO_ANTIGENIC_STIMULUS	GOBP_INFLAMMATORY_RESPONSE_TO_ANTIGENIC_STIMULUS	GOBP_INFLAMMATORY_RESPONSE_TO_ANTIGENIC_STIMULUS	2/131	27/5089	0.152354	0.403737	0.323035	Cd81/Gpx1	2	GO BP	up	NP
GOBP_INTERLEUKIN_12_PRODUCTION	GOBP_INTERLEUKIN_12_PRODUCTION	GOBP_INTERLEUKIN_12_PRODUCTION	2/131	27/5089	0.152354	0.403737	0.323035	H2-D1/H2-Q10	2	GO BP	up	NP
GOBP_INTERLEUKIN_8_PRODUCTION	GOBP_INTERLEUKIN_8_PRODUCTION	GOBP_INTERLEUKIN_8_PRODUCTION	2/131	28/5089	0.161445	0.424795	0.339884	Apoa2/Tmsb4x	2	GO BP	up	NP
GOBP_VIRAL_LIFE_CYCLE	GOBP_VIRAL_LIFE_CYCLE	GOBP_VIRAL_LIFE_CYCLE	7/131	176/5089	0.166937	0.436151	0.348971	Apoe/Cd81/Ctsl/Slc3a2/Cd55/Ppia/Hsp90ab1	7	GO BP	up	NP
GOBP_REGULATION_OF_CHEMOTAXIS	GOBP_REGULATION_OF_CHEMOTAXIS	GOBP_REGULATION_OF_CHEMOTAXIS	4/131	84/5089	0.169736	0.440363	0.35234	Tmsb4x/Ddt/Dusp1/Rarres2	4	GO BP	up	NP
GOBP_PROTEIN_FOLDING	GOBP_PROTEIN_FOLDING	GOBP_PROTEIN_FOLDING	5/131	115/5089	0.173798	0.445212	0.35622	Fkbp5/B2m/Hspa5/Ppia/Hsp90ab1	5	GO BP	up	NP
GOBP_LIPID_STORAGE	GOBP_LIPID_STORAGE	GOBP_LIPID_STORAGE	3/131	56/5089	0.174005	0.445212	0.35622	Apoe/Apoa1/Apoc4	3	GO BP	up	NP
GOBP_NERVE_DEVELOPMENT	GOBP_NERVE_DEVELOPMENT	GOBP_NERVE_DEVELOPMENT	2/131	31/5089	0.189255	0.476075	0.380914	Vcam1/Mafb	2	GO BP	up	NP
GOBP_REGULATION_OF_DENDRITIC_SPINE_DEVELOPMENT	GOBP_REGULATION_OF_DENDRITIC_SPINE_DEVELOPMENT	GOBP_REGULATION_OF_DENDRITIC_SPINE_DEVELOPMENT	2/131	31/5089	0.189255	0.476075	0.380914	Apoe/Pten	2	GO BP	up	NP
GOBP_CELL_SUBSTRATE_ADHESION	GOBP_CELL_SUBSTRATE_ADHESION	GOBP_CELL_SUBSTRATE_ADHESION	7/131	183/5089	0.1912	0.476075	0.380914	Apoa1/Vcam1/Fgb/Fgg/Pten/Plg/Fga	7	GO BP	up	NP
GOBP_G_PROTEIN_COUPLED_RECEPTOR_SIGNALING_PATHWAY	GOBP_G_PROTEIN_COUPLED_RECEPTOR_SIGNALING_PATHWAY	GOBP_G_PROTEIN_COUPLED_RECEPTOR_SIGNALING_PATHWAY	7/131	183/5089	0.1912	0.476075	0.380914	Apoe/Apoa1/Apoc3/F2/Akr1c6/Hpgd/Arrdc3	7	GO BP	up	NP
GOBP_HINDBRAIN_DEVELOPMENT	GOBP_HINDBRAIN_DEVELOPMENT	GOBP_HINDBRAIN_DEVELOPMENT	3/131	60/5089	0.200128	0.494983	0.396043	mt-Nd4/Hspa5/Mafb	3	GO BP	up	NP
GOBP_REGULATION_OF_SYNAPTIC_PLASTICITY	GOBP_REGULATION_OF_SYNAPTIC_PLASTICITY	GOBP_REGULATION_OF_SYNAPTIC_PLASTICITY	3/131	61/5089	0.206802	0.501426	0.401197	Apoe/Pten/Cd38	3	GO BP	up	NP
GOBP_HIPPOCAMPUS_DEVELOPMENT	GOBP_HIPPOCAMPUS_DEVELOPMENT	GOBP_HIPPOCAMPUS_DEVELOPMENT	2/131	33/5089	0.208139	0.501426	0.401197	Pten/Btg2	2	GO BP	up	NP
GOBP_PRODUCTION_OF_MOLECULAR_MEDIATOR_INVOLVED_IN_INFLAMMATORY_RESPONSE	GOBP_PRODUCTION_OF_MOLECULAR_MEDIATOR_INVOLVED_IN_INFLAMMATORY_RESPONSE	GOBP_PRODUCTION_OF_MOLECULAR_MEDIATOR_INVOLVED_IN_INFLAMMATORY_RESPONSE	2/131	33/5089	0.208139	0.501426	0.401197	F2/Appl2	2	GO BP	up	NP
GOBP_REGULATION_OF_CALCIUM_ION_TRANSPORT_INTO_CYTOSOL	GOBP_REGULATION_OF_CALCIUM_ION_TRANSPORT_INTO_CYTOSOL	GOBP_REGULATION_OF_CALCIUM_ION_TRANSPORT_INTO_CYTOSOL	2/131	33/5089	0.208139	0.501426	0.401197	F2/Ank2	2	GO BP	up	NP
GOBP_NERVOUS_SYSTEM_PROCESS	GOBP_NERVOUS_SYSTEM_PROCESS	GOBP_NERVOUS_SYSTEM_PROCESS	10/131	293/5089	0.221041	0.529072	0.423317	Apoe/Rbp4/Ttc36/B2m/Cebpb/Pten/Azgp1/Gjb2/Btg2/Gpx1	10	GO BP	up	NP
GOBP_CELL_MATURATION	GOBP_CELL_MATURATION	GOBP_CELL_MATURATION	3/131	64/5089	0.227116	0.529394	0.423575	Fgg/C1qa/Klf2	3	GO BP	up	NP
GOBP_CELLULAR_COMPONENT_ASSEMBLY_INVOLVED_IN_MORPHOGENESIS	GOBP_CELLULAR_COMPONENT_ASSEMBLY_INVOLVED_IN_MORPHOGENESIS	GOBP_CELLULAR_COMPONENT_ASSEMBLY_INVOLVED_IN_MORPHOGENESIS	2/131	35/5089	0.22721	0.529394	0.423575	Mef2a/Ank2	2	GO BP	up	NP
GOBP_BILE_ACID_SIGNALING_PATHWAY	GOBP_BILE_ACID_SIGNALING_PATHWAY	GOBP_BILE_ACID_SIGNALING_PATHWAY	1/131	5089-10-01	0.229737	0.529394	0.423575	Cyp8b1	1	GO BP	up	NP
GOBP_MYOBLAST_PROLIFERATION	GOBP_MYOBLAST_PROLIFERATION	GOBP_MYOBLAST_PROLIFERATION	1/131	5089-10-01	0.229737	0.529394	0.423575	Gpx1	1	GO BP	up	NP
GOBP_TOXIN_METABOLIC_PROCESS	GOBP_TOXIN_METABOLIC_PROCESS	GOBP_TOXIN_METABOLIC_PROCESS	1/131	5089-10-01	0.229737	0.529394	0.423575	Cyp3a11	1	GO BP	up	NP
GOBP_TRANSPORT_OF_VIRUS	GOBP_TRANSPORT_OF_VIRUS	GOBP_TRANSPORT_OF_VIRUS	1/131	5089-10-01	0.229737	0.529394	0.423575	Ctsl	1	GO BP	up	NP
GOBP_REGULATION_OF_ATP_DEPENDENT_ACTIVITY	GOBP_REGULATION_OF_ATP_DEPENDENT_ACTIVITY	GOBP_REGULATION_OF_ATP_DEPENDENT_ACTIVITY	2/131	36/5089	0.236795	0.541538	0.433292	Rgn/Aldob	2	GO BP	up	NP
GOBP_MUSCLE_CELL_PROLIFERATION	GOBP_MUSCLE_CELL_PROLIFERATION	GOBP_MUSCLE_CELL_PROLIFERATION	4/131	98/5089	0.244854	0.541538	0.433292	Apoe/Rbp4/Pten/Hpgd	4	GO BP	up	NP
GOBP_BINDING_OF_SPERM_TO_ZONA_PELLUCIDA	GOBP_BINDING_OF_SPERM_TO_ZONA_PELLUCIDA	GOBP_BINDING_OF_SPERM_TO_ZONA_PELLUCIDA	1/131	5089-11-01	0.249604	0.541538	0.433292	Fetub	1	GO BP	up	NP
GOBP_CELLULAR_METABOLIC_COMPOUND_SALVAGE	GOBP_CELLULAR_METABOLIC_COMPOUND_SALVAGE	GOBP_CELLULAR_METABOLIC_COMPOUND_SALVAGE	1/131	5089-11-01	0.249604	0.541538	0.433292	Bhmt	1	GO BP	up	NP
GOBP_CEREBELLAR_PURKINJE_CELL_LAYER_DEVELOPMENT	GOBP_CEREBELLAR_PURKINJE_CELL_LAYER_DEVELOPMENT	GOBP_CEREBELLAR_PURKINJE_CELL_LAYER_DEVELOPMENT	1/131	5089-11-01	0.249604	0.541538	0.433292	Hspa5	1	GO BP	up	NP
GOBP_CYTOLYSIS	GOBP_CYTOLYSIS	GOBP_CYTOLYSIS	1/131	5089-11-01	0.249604	0.541538	0.433292	C8g	1	GO BP	up	NP
GOBP_IMMUNE_RESPONSE_TO_TUMOR_CELL	GOBP_IMMUNE_RESPONSE_TO_TUMOR_CELL	GOBP_IMMUNE_RESPONSE_TO_TUMOR_CELL	1/131	5089-11-01	0.249604	0.541538	0.433292	H2-Q10	1	GO BP	up	NP
GOBP_MATING	GOBP_MATING	GOBP_MATING	1/131	5089-11-01	0.249604	0.541538	0.433292	Pten	1	GO BP	up	NP
GOBP_REGULATION_OF_CARDIAC_MUSCLE_CELL_MEMBRANE_REPOLARIZATION	GOBP_REGULATION_OF_CARDIAC_MUSCLE_CELL_MEMBRANE_REPOLARIZATION	GOBP_REGULATION_OF_CARDIAC_MUSCLE_CELL_MEMBRANE_REPOLARIZATION	1/131	5089-11-01	0.249604	0.541538	0.433292	Ank2	1	GO BP	up	NP
GOBP_SYNAPSE_MATURATION	GOBP_SYNAPSE_MATURATION	GOBP_SYNAPSE_MATURATION	1/131	5089-11-01	0.249604	0.541538	0.433292	Pten	1	GO BP	up	NP
GOBP_MONONUCLEAR_CELL_MIGRATION	GOBP_MONONUCLEAR_CELL_MIGRATION	GOBP_MONONUCLEAR_CELL_MIGRATION	3/131	68/5089	0.254755	0.546324	0.437121	Dusp1/Rarres2/Plg	3	GO BP	up	NP
GOBP_TUMOR_NECROSIS_FACTOR_SUPERFAMILY_CYTOKINE_PRODUCTION	GOBP_TUMOR_NECROSIS_FACTOR_SUPERFAMILY_CYTOKINE_PRODUCTION	GOBP_TUMOR_NECROSIS_FACTOR_SUPERFAMILY_CYTOKINE_PRODUCTION	3/131	68/5089	0.254755	0.546324	0.437121	Ddt/Orm1/Zfp36	3	GO BP	up	NP
GOBP_TISSUE_MIGRATION	GOBP_TISSUE_MIGRATION	GOBP_TISSUE_MIGRATION	6/131	168/5089	0.263933	0.557458	0.44603	Apoe/Apoa1/Tmsb4x/Apoh/Pten/Gpx1	6	GO BP	up	NP
GOBP_VIRAL_PROCESS	GOBP_VIRAL_PROCESS	GOBP_VIRAL_PROCESS	8/131	237/5089	0.265176	0.557458	0.44603	Apoe/Cd81/Ctsl/Slc3a2/Zfp36/Cd55/Ppia/Hsp90ab1	8	GO BP	up	NP
GOBP_LYMPHOCYTE_COSTIMULATION	GOBP_LYMPHOCYTE_COSTIMULATION	GOBP_LYMPHOCYTE_COSTIMULATION	1/131	5089-12-01	0.268962	0.557458	0.44603	Cd81	1	GO BP	up	NP
GOBP_REGULATION_OF_MEIOTIC_CELL_CYCLE	GOBP_REGULATION_OF_MEIOTIC_CELL_CYCLE	GOBP_REGULATION_OF_MEIOTIC_CELL_CYCLE	1/131	5089-12-01	0.268962	0.557458	0.44603	Dusp1	1	GO BP	up	NP
GOBP_REGULATION_OF_TRANSLATIONAL_FIDELITY	GOBP_REGULATION_OF_TRANSLATIONAL_FIDELITY	GOBP_REGULATION_OF_TRANSLATIONAL_FIDELITY	1/131	5089-12-01	0.268962	0.557458	0.44603	Rps5	1	GO BP	up	NP
GOBP_SPERM_EGG_RECOGNITION	GOBP_SPERM_EGG_RECOGNITION	GOBP_SPERM_EGG_RECOGNITION	1/131	5089-12-01	0.268962	0.557458	0.44603	Fetub	1	GO BP	up	NP
GOBP_PIGMENT_METABOLIC_PROCESS	GOBP_PIGMENT_METABOLIC_PROCESS	GOBP_PIGMENT_METABOLIC_PROCESS	2/131	40/5089	0.275282	0.567387	0.453974	Ddt/Ambp	2	GO BP	up	NP
GOBP_RESPONSE_TO_ACID_CHEMICAL	GOBP_RESPONSE_TO_ACID_CHEMICAL	GOBP_RESPONSE_TO_ACID_CHEMICAL	3/131	72/5089	0.282845	0.567995	0.45446	Cebpb/Ass1/Klf2	3	GO BP	up	NP
GOBP_REACTIVE_OXYGEN_SPECIES_METABOLIC_PROCESS	GOBP_REACTIVE_OXYGEN_SPECIES_METABOLIC_PROCESS	GOBP_REACTIVE_OXYGEN_SPECIES_METABOLIC_PROCESS	4/131	105/5089	0.284908	0.567995	0.45446	Cat/F2/mt-Co2/Gpx1	4	GO BP	up	NP
GOBP_CELL_COMMUNICATION_BY_ELECTRICAL_COUPLING	GOBP_CELL_COMMUNICATION_BY_ELECTRICAL_COUPLING	GOBP_CELL_COMMUNICATION_BY_ELECTRICAL_COUPLING	1/131	13/5089	0.287825	0.567995	0.45446	Gjb2	1	GO BP	up	NP
GOBP_FEAR_RESPONSE	GOBP_FEAR_RESPONSE	GOBP_FEAR_RESPONSE	1/131	13/5089	0.287825	0.567995	0.45446	Apoe	1	GO BP	up	NP
GOBP_MALE_MEIOTIC_NUCLEAR_DIVISION	GOBP_MALE_MEIOTIC_NUCLEAR_DIVISION	GOBP_MALE_MEIOTIC_NUCLEAR_DIVISION	1/131	13/5089	0.287825	0.567995	0.45446	Ubb	1	GO BP	up	NP
GOBP_OXIDATIVE_DEMETHYLATION	GOBP_OXIDATIVE_DEMETHYLATION	GOBP_OXIDATIVE_DEMETHYLATION	1/131	13/5089	0.287825	0.567995	0.45446	Cyp3a11	1	GO BP	up	NP
GOBP_PHAGOCYTOSIS_RECOGNITION	GOBP_PHAGOCYTOSIS_RECOGNITION	GOBP_PHAGOCYTOSIS_RECOGNITION	1/131	13/5089	0.287825	0.567995	0.45446	Colec12	1	GO BP	up	NP
GOBP_REGULATION_OF_MEMBRANE_REPOLARIZATION	GOBP_REGULATION_OF_MEMBRANE_REPOLARIZATION	GOBP_REGULATION_OF_MEMBRANE_REPOLARIZATION	1/131	13/5089	0.287825	0.567995	0.45446	Ank2	1	GO BP	up	NP
GOBP_SULFUR_COMPOUND_METABOLIC_PROCESS	GOBP_SULFUR_COMPOUND_METABOLIC_PROCESS	GOBP_SULFUR_COMPOUND_METABOLIC_PROCESS	6/131	176/5089	0.29969	0.574051	0.459306	Bhmt/Gsta3/Tdo2/Cth/Mat1a/Gpx1	6	GO BP	up	NP
GOBP_METENCEPHALON_DEVELOPMENT	GOBP_METENCEPHALON_DEVELOPMENT	GOBP_METENCEPHALON_DEVELOPMENT	2/131	43/5089	0.304116	0.574051	0.459306	mt-Nd4/Hspa5	2	GO BP	up	NP
GOBP_PROTEIN_TRANSMEMBRANE_TRANSPORT	GOBP_PROTEIN_TRANSMEMBRANE_TRANSPORT	GOBP_PROTEIN_TRANSMEMBRANE_TRANSPORT	2/131	43/5089	0.304116	0.574051	0.459306	Hspa5/Azgp1	2	GO BP	up	NP
GOBP_C21_STEROID_HORMONE_METABOLIC_PROCESS	GOBP_C21_STEROID_HORMONE_METABOLIC_PROCESS	GOBP_C21_STEROID_HORMONE_METABOLIC_PROCESS	1/131	14/5089	0.306205	0.574051	0.459306	Akr1c6	1	GO BP	up	NP
GOBP_INTERLEUKIN_4_PRODUCTION	GOBP_INTERLEUKIN_4_PRODUCTION	GOBP_INTERLEUKIN_4_PRODUCTION	1/131	14/5089	0.306205	0.574051	0.459306	Cebpb	1	GO BP	up	NP
GOBP_MATERNAL_PLACENTA_DEVELOPMENT	GOBP_MATERNAL_PLACENTA_DEVELOPMENT	GOBP_MATERNAL_PLACENTA_DEVELOPMENT	1/131	14/5089	0.306205	0.574051	0.459306	Gjb2	1	GO BP	up	NP
GOBP_POSITIVE_T_CELL_SELECTION	GOBP_POSITIVE_T_CELL_SELECTION	GOBP_POSITIVE_T_CELL_SELECTION	1/131	14/5089	0.306205	0.574051	0.459306	Ctsl	1	GO BP	up	NP
GOBP_REGULATION_OF_CARDIAC_MUSCLE_CELL_ACTION_POTENTIAL	GOBP_REGULATION_OF_CARDIAC_MUSCLE_CELL_ACTION_POTENTIAL	GOBP_REGULATION_OF_CARDIAC_MUSCLE_CELL_ACTION_POTENTIAL	1/131	14/5089	0.306205	0.574051	0.459306	Ank2	1	GO BP	up	NP
GOBP_RHYTHMIC_BEHAVIOR	GOBP_RHYTHMIC_BEHAVIOR	GOBP_RHYTHMIC_BEHAVIOR	1/131	14/5089	0.306205	0.574051	0.459306	Pten	1	GO BP	up	NP
GOBP_SEX_DIFFERENTIATION	GOBP_SEX_DIFFERENTIATION	GOBP_SEX_DIFFERENTIATION	4/131	109/5089	0.308237	0.574051	0.459306	Rbp4/Ubb/Hspa5/Cebpb	4	GO BP	up	NP
GOBP_CHAPERONE_MEDIATED_PROTEIN_FOLDING	GOBP_CHAPERONE_MEDIATED_PROTEIN_FOLDING	GOBP_CHAPERONE_MEDIATED_PROTEIN_FOLDING	2/131	44/5089	0.313689	0.574051	0.459306	Fkbp5/Hspa5	2	GO BP	up	NP
GOBP_REGULATION_OF_CELLULAR_RESPONSE_TO_INSULIN_STIMULUS	GOBP_REGULATION_OF_CELLULAR_RESPONSE_TO_INSULIN_STIMULUS	GOBP_REGULATION_OF_CELLULAR_RESPONSE_TO_INSULIN_STIMULUS	2/131	44/5089	0.313689	0.574051	0.459306	Ahsg/Appl2	2	GO BP	up	NP
GOBP_REGULATION_OF_MUSCLE_ADAPTATION	GOBP_REGULATION_OF_MUSCLE_ADAPTATION	GOBP_REGULATION_OF_MUSCLE_ADAPTATION	2/131	44/5089	0.313689	0.574051	0.459306	Hamp/Mef2a	2	GO BP	up	NP
GOBP_REGULATION_OF_REPRODUCTIVE_PROCESS	GOBP_REGULATION_OF_REPRODUCTIVE_PROCESS	GOBP_REGULATION_OF_REPRODUCTIVE_PROCESS	2/131	44/5089	0.313689	0.574051	0.459306	Rgn/Dusp1	2	GO BP	up	NP
GOBP_DEVELOPMENTAL_MATURATION	GOBP_DEVELOPMENTAL_MATURATION	GOBP_DEVELOPMENTAL_MATURATION	4/131	110/5089	0.314104	0.574051	0.459306	Fgg/C1qa/Pten/Klf2	4	GO BP	up	NP
GOBP_DEVELOPMENTAL_CELL_GROWTH	GOBP_DEVELOPMENTAL_CELL_GROWTH	GOBP_DEVELOPMENTAL_CELL_GROWTH	4/131	111/5089	0.319981	0.581926	0.465607	Apoe/Hamp/Nrn1/Hsp90ab1	4	GO BP	up	NP
GOBP_DIENCEPHALON_DEVELOPMENT	GOBP_DIENCEPHALON_DEVELOPMENT	GOBP_DIENCEPHALON_DEVELOPMENT	1/131	15/5089	0.324113	0.586566	0.469319	Ubb	1	GO BP	up	NP
GOBP_OSTEOBLAST_DIFFERENTIATION	GOBP_OSTEOBLAST_DIFFERENTIATION	GOBP_OSTEOBLAST_DIFFERENTIATION	4/131	112/5089	0.325867	0.586877	0.469568	Id3/Cat/Cebpb/Tent5a	4	GO BP	up	NP
GOBP_DENDRITIC_SPINE_DEVELOPMENT	GOBP_DENDRITIC_SPINE_DEVELOPMENT	GOBP_DENDRITIC_SPINE_DEVELOPMENT	2/131	46/5089	0.332748	0.5878	0.470306	Apoe/Pten	2	GO BP	up	NP
GOBP_HINDBRAIN_MORPHOGENESIS	GOBP_HINDBRAIN_MORPHOGENESIS	GOBP_HINDBRAIN_MORPHOGENESIS	1/131	16/5089	0.341563	0.5878	0.470306	Hspa5	1	GO BP	up	NP
GOBP_OVULATION_CYCLE_PROCESS	GOBP_OVULATION_CYCLE_PROCESS	GOBP_OVULATION_CYCLE_PROCESS	1/131	16/5089	0.341563	0.5878	0.470306	Hspa5	1	GO BP	up	NP
GOBP_REGULATION_OF_NEURON_PROJECTION_REGENERATION	GOBP_REGULATION_OF_NEURON_PROJECTION_REGENERATION	GOBP_REGULATION_OF_NEURON_PROJECTION_REGENERATION	1/131	16/5089	0.341563	0.5878	0.470306	Pten	1	GO BP	up	NP
GOBP_RESPIRATORY_BURST	GOBP_RESPIRATORY_BURST	GOBP_RESPIRATORY_BURST	1/131	16/5089	0.341563	0.5878	0.470306	Cd55	1	GO BP	up	NP
GOBP_SPERM_MOTILITY	GOBP_SPERM_MOTILITY	GOBP_SPERM_MOTILITY	1/131	16/5089	0.341563	0.5878	0.470306	Rgn	1	GO BP	up	NP
GOBP_TYPE_2_IMMUNE_RESPONSE	GOBP_TYPE_2_IMMUNE_RESPONSE	GOBP_TYPE_2_IMMUNE_RESPONSE	1/131	16/5089	0.341563	0.5878	0.470306	Cd81	1	GO BP	up	NP
GOBP_VIRAL_RELEASE_FROM_HOST_CELL	GOBP_VIRAL_RELEASE_FROM_HOST_CELL	GOBP_VIRAL_RELEASE_FROM_HOST_CELL	1/131	16/5089	0.341563	0.5878	0.470306	Ppia	1	GO BP	up	NP
GOBP_TAXIS	GOBP_TAXIS	GOBP_TAXIS	7/131	221/5089	0.341966	0.5878	0.470306	Apoa1/Vcam1/Tmsb4x/Ddt/Dusp1/Rarres2/Ppia	7	GO BP	up	NP
GOBP_SEQUESTERING_OF_CALCIUM_ION	GOBP_SEQUESTERING_OF_CALCIUM_ION	GOBP_SEQUESTERING_OF_CALCIUM_ION	2/131	47/5089	0.342223	0.5878	0.470306	F2/Ank2	2	GO BP	up	NP
GOBP_REGULATION_OF_BINDING	GOBP_REGULATION_OF_BINDING	GOBP_REGULATION_OF_BINDING	6/131	186/5089	0.345586	0.590116	0.47216	Apoe/Tmsb4x/Ttc36/B2m/Rpl11/Hsp90ab1	6	GO BP	up	NP
GOBP_MULTICELLULAR_ORGANISM_GROWTH	GOBP_MULTICELLULAR_ORGANISM_GROWTH	GOBP_MULTICELLULAR_ORGANISM_GROWTH	3/131	81/5089	0.346753	0.590116	0.47216	Zfp36l1/Gamt/Klf2	3	GO BP	up	NP
GOBP_REGULATION_OF_DEVELOPMENTAL_GROWTH	GOBP_REGULATION_OF_DEVELOPMENTAL_GROWTH	GOBP_REGULATION_OF_DEVELOPMENTAL_GROWTH	5/131	151/5089	0.34837	0.590161	0.472195	Apoe/Rbp4/Hamp/Pten/Gamt	5	GO BP	up	NP
GOBP_RESPONSE_TO_MECHANICAL_STIMULUS	GOBP_RESPONSE_TO_MECHANICAL_STIMULUS	GOBP_RESPONSE_TO_MECHANICAL_STIMULUS	3/131	82/5089	0.353854	0.595161	0.476196	Btg2/Txnip/Pkd2l2	3	GO BP	up	NP
GOBP_BIOLOGICAL_PROCESS_INVOLVED_IN_INTRASPECIES_INTERACTION_BETWEEN_ORGANISMS	GOBP_BIOLOGICAL_PROCESS_INVOLVED_IN_INTRASPECIES_INTERACTION_BETWEEN_ORGANISMS	GOBP_BIOLOGICAL_PROCESS_INVOLVED_IN_INTRASPECIES_INTERACTION_BETWEEN_ORGANISMS	1/131	17/5089	0.358566	0.595161	0.476196	Pten	1	GO BP	up	NP
GOBP_RETINA_MORPHOGENESIS_IN_CAMERA_TYPE_EYE	GOBP_RETINA_MORPHOGENESIS_IN_CAMERA_TYPE_EYE	GOBP_RETINA_MORPHOGENESIS_IN_CAMERA_TYPE_EYE	1/131	17/5089	0.358566	0.595161	0.476196	Rbp4	1	GO BP	up	NP
GOBP_VISUAL_BEHAVIOR	GOBP_VISUAL_BEHAVIOR	GOBP_VISUAL_BEHAVIOR	1/131	17/5089	0.358566	0.595161	0.476196	Ttc36	1	GO BP	up	NP
GOBP_RESPONSE_TO_RADIATION	GOBP_RESPONSE_TO_RADIATION	GOBP_RESPONSE_TO_RADIATION	6/131	189/5089	0.359516	0.595161	0.476196	Vcam1/Hamp/Ttc36/Cat/Hspa5/Gpx1	6	GO BP	up	NP
GOBP_ORGAN_GROWTH	GOBP_ORGAN_GROWTH	GOBP_ORGAN_GROWTH	3/131	83/5089	0.360946	0.595161	0.476196	Rbp4/Hamp/Pten	3	GO BP	up	NP
GOBP_MUSCLE_SYSTEM_PROCESS	GOBP_MUSCLE_SYSTEM_PROCESS	GOBP_MUSCLE_SYSTEM_PROCESS	5/131	156/5089	0.374217	0.605106	0.484154	Hamp/Mef2a/Gamt/Cd38/Ank2	5	GO BP	up	NP
GOBP_RESPONSE_TO_TEMPERATURE_STIMULUS	GOBP_RESPONSE_TO_TEMPERATURE_STIMULUS	GOBP_RESPONSE_TO_TEMPERATURE_STIMULUS	3/131	85/5089	0.375097	0.605106	0.484154	mt-Co2/Appl2/Hsp90ab1	3	GO BP	up	NP
GOBP_CILIUM_OR_FLAGELLUM_DEPENDENT_CELL_MOTILITY	GOBP_CILIUM_OR_FLAGELLUM_DEPENDENT_CELL_MOTILITY	GOBP_CILIUM_OR_FLAGELLUM_DEPENDENT_CELL_MOTILITY	1/131	18/5089	0.375133	0.605106	0.484154	Rgn	1	GO BP	up	NP
GOBP_COLLAGEN_BIOSYNTHETIC_PROCESS	GOBP_COLLAGEN_BIOSYNTHETIC_PROCESS	GOBP_COLLAGEN_BIOSYNTHETIC_PROCESS	1/131	18/5089	0.375133	0.605106	0.484154	F2	1	GO BP	up	NP
GOBP_DETECTION_OF_STIMULUS_INVOLVED_IN_SENSORY_PERCEPTION	GOBP_DETECTION_OF_STIMULUS_INVOLVED_IN_SENSORY_PERCEPTION	GOBP_DETECTION_OF_STIMULUS_INVOLVED_IN_SENSORY_PERCEPTION	1/131	18/5089	0.375133	0.605106	0.484154	Azgp1	1	GO BP	up	NP
GOBP_BONE_MINERALIZATION	GOBP_BONE_MINERALIZATION	GOBP_BONE_MINERALIZATION	2/131	51/5089	0.379667	0.60714	0.485781	Ahsg/Tent5a	2	GO BP	up	NP
GOBP_CELLULAR_SENESCENCE	GOBP_CELLULAR_SENESCENCE	GOBP_CELLULAR_SENESCENCE	2/131	51/5089	0.379667	0.60714	0.485781	B2m/H2-Q10	2	GO BP	up	NP
GOBP_REGULATION_OF_OSSIFICATION	GOBP_REGULATION_OF_OSSIFICATION	GOBP_REGULATION_OF_OSSIFICATION	2/131	52/5089	0.388895	0.615098	0.492148	Ahsg/Tent5a	2	GO BP	up	NP
GOBP_RESPONSE_TO_STARVATION	GOBP_RESPONSE_TO_STARVATION	GOBP_RESPONSE_TO_STARVATION	4/131	123/5089	0.390813	0.615098	0.492148	Alb/Hamp/Hspa5/Zfp36	4	GO BP	up	NP
GOBP_CEREBELLAR_CORTEX_DEVELOPMENT	GOBP_CEREBELLAR_CORTEX_DEVELOPMENT	GOBP_CEREBELLAR_CORTEX_DEVELOPMENT	1/131	19/5089	0.391275	0.615098	0.492148	Hspa5	1	GO BP	up	NP
GOBP_LOW_DENSITY_LIPOPROTEIN_PARTICLE_CLEARANCE	GOBP_LOW_DENSITY_LIPOPROTEIN_PARTICLE_CLEARANCE	GOBP_LOW_DENSITY_LIPOPROTEIN_PARTICLE_CLEARANCE	1/131	19/5089	0.391275	0.615098	0.492148	Apoc3	1	GO BP	up	NP
GOBP_DEVELOPMENT_OF_PRIMARY_SEXUAL_CHARACTERISTICS	GOBP_DEVELOPMENT_OF_PRIMARY_SEXUAL_CHARACTERISTICS	GOBP_DEVELOPMENT_OF_PRIMARY_SEXUAL_CHARACTERISTICS	3/131	88/5089	0.396208	0.620224	0.496249	Ubb/Hspa5/Cebpb	3	GO BP	up	NP
GOBP_CARBOHYDRATE_TRANSMEMBRANE_TRANSPORT	GOBP_CARBOHYDRATE_TRANSMEMBRANE_TRANSPORT	GOBP_CARBOHYDRATE_TRANSMEMBRANE_TRANSPORT	2/131	53/5089	0.398063	0.62051	0.496479	Mef2a/Appl2	2	GO BP	up	NP
GOBP_ESTROGEN_METABOLIC_PROCESS	GOBP_ESTROGEN_METABOLIC_PROCESS	GOBP_ESTROGEN_METABOLIC_PROCESS	1/131	20/5089	0.407004	0.624212	0.499441	Cyp3a11	1	GO BP	up	NP
GOBP_SYNCYTIUM_FORMATION	GOBP_SYNCYTIUM_FORMATION	GOBP_SYNCYTIUM_FORMATION	1/131	20/5089	0.407004	0.624212	0.499441	Cd81	1	GO BP	up	NP
GOBP_T_CELL_SELECTION	GOBP_T_CELL_SELECTION	GOBP_T_CELL_SELECTION	1/131	20/5089	0.407004	0.624212	0.499441	Ctsl	1	GO BP	up	NP
GOBP_MUSCLE_ADAPTATION	GOBP_MUSCLE_ADAPTATION	GOBP_MUSCLE_ADAPTATION	2/131	54/5089	0.407168	0.624212	0.499441	Hamp/Mef2a	2	GO BP	up	NP
GOBP_ANATOMICAL_STRUCTURE_MATURATION	GOBP_ANATOMICAL_STRUCTURE_MATURATION	GOBP_ANATOMICAL_STRUCTURE_MATURATION	3/131	90/5089	0.410181	0.626244	0.501066	Fgg/C1qa/Klf2	3	GO BP	up	NP
GOBP_TRABECULA_MORPHOGENESIS	GOBP_TRABECULA_MORPHOGENESIS	GOBP_TRABECULA_MORPHOGENESIS	1/131	21/5089	0.422329	0.639776	0.511894	Rbp4	1	GO BP	up	NP
GOBP_ENSHEATHMENT_OF_NEURONS	GOBP_ENSHEATHMENT_OF_NEURONS	GOBP_ENSHEATHMENT_OF_NEURONS	2/131	56/5089	0.425177	0.639776	0.511894	Pten/Ank2	2	GO BP	up	NP
GOBP_IMPORT_ACROSS_PLASMA_MEMBRANE	GOBP_IMPORT_ACROSS_PLASMA_MEMBRANE	GOBP_IMPORT_ACROSS_PLASMA_MEMBRANE	2/131	56/5089	0.425177	0.639776	0.511894	Kcnj16/Slc3a2	2	GO BP	up	NP
GOBP_REGULATION_OF_MEMBRANE_POTENTIAL	GOBP_REGULATION_OF_MEMBRANE_POTENTIAL	GOBP_REGULATION_OF_MEMBRANE_POTENTIAL	4/131	129/5089	0.425986	0.639776	0.511894	Ubb/Pten/Chchd10/Ank2	4	GO BP	up	NP
GOBP_NEURAL_PRECURSOR_CELL_PROLIFERATION	GOBP_NEURAL_PRECURSOR_CELL_PROLIFERATION	GOBP_NEURAL_PRECURSOR_CELL_PROLIFERATION	2/131	57/5089	0.434077	0.639776	0.511894	Btg2/Appl2	2	GO BP	up	NP
GOBP_AMYLOID_BETA_CLEARANCE	GOBP_AMYLOID_BETA_CLEARANCE	GOBP_AMYLOID_BETA_CLEARANCE	1/131	22/5089	0.437261	0.639776	0.511894	Apoe	1	GO BP	up	NP
GOBP_OVULATION_CYCLE	GOBP_OVULATION_CYCLE	GOBP_OVULATION_CYCLE	1/131	22/5089	0.437261	0.639776	0.511894	Hspa5	1	GO BP	up	NP
GOBP_REGULATION_OF_VASCULAR_PERMEABILITY	GOBP_REGULATION_OF_VASCULAR_PERMEABILITY	GOBP_REGULATION_OF_VASCULAR_PERMEABILITY	1/131	22/5089	0.437261	0.639776	0.511894	Apoe	1	GO BP	up	NP
GOBP_TRANSFORMING_GROWTH_FACTOR_BETA_PRODUCTION	GOBP_TRANSFORMING_GROWTH_FACTOR_BETA_PRODUCTION	GOBP_TRANSFORMING_GROWTH_FACTOR_BETA_PRODUCTION	1/131	22/5089	0.437261	0.639776	0.511894	Hsp90ab1	1	GO BP	up	NP
GOBP_REGULATION_OF_DNA_BINDING_TRANSCRIPTION_FACTOR_ACTIVITY	GOBP_REGULATION_OF_DNA_BINDING_TRANSCRIPTION_FACTOR_ACTIVITY	GOBP_REGULATION_OF_DNA_BINDING_TRANSCRIPTION_FACTOR_ACTIVITY	6/131	206/5089	0.438694	0.639776	0.511894	Tmsb4x/Id3/Cat/Cth/Pten/Ppia	6	GO BP	up	NP
GOBP_IMMUNOGLOBULIN_PRODUCTION	GOBP_IMMUNOGLOBULIN_PRODUCTION	GOBP_IMMUNOGLOBULIN_PRODUCTION	2/131	58/5089	0.442903	0.639776	0.511894	Rbp4/B2m	2	GO BP	up	NP
GOBP_REGULATION_OF_EPITHELIAL_CELL_MIGRATION	GOBP_REGULATION_OF_EPITHELIAL_CELL_MIGRATION	GOBP_REGULATION_OF_EPITHELIAL_CELL_MIGRATION	4/131	133/5089	0.449169	0.639776	0.511894	Apoe/Tmsb4x/Apoh/Pten	4	GO BP	up	NP
GOBP_BLOOD_VESSEL_REMODELING	GOBP_BLOOD_VESSEL_REMODELING	GOBP_BLOOD_VESSEL_REMODELING	1/131	23/5089	0.45181	0.639776	0.511894	Cst3	1	GO BP	up	NP
GOBP_CELL_COMMUNICATION_INVOLVED_IN_CARDIAC_CONDUCTION	GOBP_CELL_COMMUNICATION_INVOLVED_IN_CARDIAC_CONDUCTION	GOBP_CELL_COMMUNICATION_INVOLVED_IN_CARDIAC_CONDUCTION	1/131	23/5089	0.45181	0.639776	0.511894	Ank2	1	GO BP	up	NP
GOBP_CELL_REDOX_HOMEOSTASIS	GOBP_CELL_REDOX_HOMEOSTASIS	GOBP_CELL_REDOX_HOMEOSTASIS	1/131	23/5089	0.45181	0.639776	0.511894	Gpx1	1	GO BP	up	NP
GOBP_MATERNAL_PROCESS_INVOLVED_IN_FEMALE_PREGNANCY	GOBP_MATERNAL_PROCESS_INVOLVED_IN_FEMALE_PREGNANCY	GOBP_MATERNAL_PROCESS_INVOLVED_IN_FEMALE_PREGNANCY	1/131	23/5089	0.45181	0.639776	0.511894	Gjb2	1	GO BP	up	NP
GOBP_REGULATION_OF_ACTION_POTENTIAL	GOBP_REGULATION_OF_ACTION_POTENTIAL	GOBP_REGULATION_OF_ACTION_POTENTIAL	1/131	23/5089	0.45181	0.639776	0.511894	Ank2	1	GO BP	up	NP
GOBP_REGULATION_OF_MYELINATION	GOBP_REGULATION_OF_MYELINATION	GOBP_REGULATION_OF_MYELINATION	1/131	23/5089	0.45181	0.639776	0.511894	Pten	1	GO BP	up	NP
GOBP_VIRION_ASSEMBLY	GOBP_VIRION_ASSEMBLY	GOBP_VIRION_ASSEMBLY	1/131	23/5089	0.45181	0.639776	0.511894	Apoe	1	GO BP	up	NP
GOBP_OVARIAN_FOLLICLE_DEVELOPMENT	GOBP_OVARIAN_FOLLICLE_DEVELOPMENT	GOBP_OVARIAN_FOLLICLE_DEVELOPMENT	1/131	24/5089	0.465985	0.652379	0.521977	Cebpb	1	GO BP	up	NP
GOBP_RESPIRATORY_GASEOUS_EXCHANGE_BY_RESPIRATORY_SYSTEM	GOBP_RESPIRATORY_GASEOUS_EXCHANGE_BY_RESPIRATORY_SYSTEM	GOBP_RESPIRATORY_GASEOUS_EXCHANGE_BY_RESPIRATORY_SYSTEM	1/131	24/5089	0.465985	0.652379	0.521977	Mafb	1	GO BP	up	NP
GOBP_RESPONSE_TO_ISCHEMIA	GOBP_RESPONSE_TO_ISCHEMIA	GOBP_RESPONSE_TO_ISCHEMIA	1/131	24/5089	0.465985	0.652379	0.521977	Gjb2	1	GO BP	up	NP
GOBP_MYELOID_LEUKOCYTE_ACTIVATION	GOBP_MYELOID_LEUKOCYTE_ACTIVATION	GOBP_MYELOID_LEUKOCYTE_ACTIVATION	3/131	99/5089	0.471687	0.657879	0.526378	Hamp/C1qa/Vsig4	3	GO BP	up	NP
GOBP_ENERGY_HOMEOSTASIS	GOBP_ENERGY_HOMEOSTASIS	GOBP_ENERGY_HOMEOSTASIS	1/131	25/5089	0.479797	0.666684	0.533423	Ubb	1	GO BP	up	NP
GOBP_ORGANIC_ACID_TRANSMEMBRANE_TRANSPORT	GOBP_ORGANIC_ACID_TRANSMEMBRANE_TRANSPORT	GOBP_ORGANIC_ACID_TRANSMEMBRANE_TRANSPORT	2/131	63/5089	0.485865	0.672597	0.538154	Slc38a4/Slc3a2	2	GO BP	up	NP
GOBP_DE_NOVO_PROTEIN_FOLDING	GOBP_DE_NOVO_PROTEIN_FOLDING	GOBP_DE_NOVO_PROTEIN_FOLDING	1/131	26/5089	0.493254	0.675266	0.54029	Hspa5	1	GO BP	up	NP
GOBP_REGULATION_OF_POSTSYNAPTIC_MEMBRANE_NEUROTRANSMITTER_RECEPTOR_LEVELS	GOBP_REGULATION_OF_POSTSYNAPTIC_MEMBRANE_NEUROTRANSMITTER_RECEPTOR_LEVELS	GOBP_REGULATION_OF_POSTSYNAPTIC_MEMBRANE_NEUROTRANSMITTER_RECEPTOR_LEVELS	1/131	26/5089	0.493254	0.675266	0.54029	Ctnnd1	1	GO BP	up	NP
GOBP_STEM_CELL_PROLIFERATION	GOBP_STEM_CELL_PROLIFERATION	GOBP_STEM_CELL_PROLIFERATION	1/131	26/5089	0.493254	0.675266	0.54029	Zfp36l1	1	GO BP	up	NP
GOBP_CELLULAR_EXTRAVASATION	GOBP_CELLULAR_EXTRAVASATION	GOBP_CELLULAR_EXTRAVASATION	1/131	27/5089	0.506365	0.690667	0.552612	Vcam1	1	GO BP	up	NP
GOBP_ESTABLISHMENT_OF_RNA_LOCALIZATION	GOBP_ESTABLISHMENT_OF_RNA_LOCALIZATION	GOBP_ESTABLISHMENT_OF_RNA_LOCALIZATION	3/131	105/5089	0.511079	0.694544	0.555714	Srsf7/Zfp36l1/Zfp36	3	GO BP	up	NP
GOBP_REGIONALIZATION	GOBP_REGIONALIZATION	GOBP_REGIONALIZATION	3/131	106/5089	0.517498	0.69783	0.558343	C1qa/Mafb/Btg2	3	GO BP	up	NP
GOBP_DETECTION_OF_ABIOTIC_STIMULUS	GOBP_DETECTION_OF_ABIOTIC_STIMULUS	GOBP_DETECTION_OF_ABIOTIC_STIMULUS	1/131	28/5089	0.51914	0.69783	0.558343	Pkd2l2	1	GO BP	up	NP
GOBP_NEURAL_NUCLEUS_DEVELOPMENT	GOBP_NEURAL_NUCLEUS_DEVELOPMENT	GOBP_NEURAL_NUCLEUS_DEVELOPMENT	1/131	28/5089	0.51914	0.69783	0.558343	Hspa5	1	GO BP	up	NP
GOBP_OSSIFICATION	GOBP_OSSIFICATION	GOBP_OSSIFICATION	5/131	186/5089	0.526052	0.704568	0.563734	Id3/Cat/Cebpb/Ahsg/Tent5a	5	GO BP	up	NP
GOBP_REGULATION_OF_CELL_DIVISION	GOBP_REGULATION_OF_CELL_DIVISION	GOBP_REGULATION_OF_CELL_DIVISION	2/131	69/5089	0.534646	0.710384	0.568388	Cat/Txnip	2	GO BP	up	NP
GOBP_RHYTHMIC_PROCESS	GOBP_RHYTHMIC_PROCESS	GOBP_RHYTHMIC_PROCESS	4/131	149/5089	0.538449	0.710384	0.568388	Id3/Hspa5/Ass1/Pten	4	GO BP	up	NP
GOBP_GLOMERULUS_DEVELOPMENT	GOBP_GLOMERULUS_DEVELOPMENT	GOBP_GLOMERULUS_DEVELOPMENT	1/131	30/5089	0.543714	0.710384	0.568388	Mtss1	1	GO BP	up	NP
GOBP_REACTIVE_OXYGEN_SPECIES_BIOSYNTHETIC_PROCESS	GOBP_REACTIVE_OXYGEN_SPECIES_BIOSYNTHETIC_PROCESS	GOBP_REACTIVE_OXYGEN_SPECIES_BIOSYNTHETIC_PROCESS	1/131	30/5089	0.543714	0.710384	0.568388	mt-Co2	1	GO BP	up	NP
GOBP_VIRAL_TRANSCRIPTION	GOBP_VIRAL_TRANSCRIPTION	GOBP_VIRAL_TRANSCRIPTION	1/131	30/5089	0.543714	0.710384	0.568388	Zfp36	1	GO BP	up	NP
GOBP_CELLULAR_RESPONSE_TO_ABIOTIC_STIMULUS	GOBP_CELLULAR_RESPONSE_TO_ABIOTIC_STIMULUS	GOBP_CELLULAR_RESPONSE_TO_ABIOTIC_STIMULUS	4/131	150/5089	0.543798	0.710384	0.568388	Hamp/Hspa5/Zfp36l1/Pten	4	GO BP	up	NP
GOBP_FOREBRAIN_DEVELOPMENT	GOBP_FOREBRAIN_DEVELOPMENT	GOBP_FOREBRAIN_DEVELOPMENT	4/131	150/5089	0.543798	0.710384	0.568388	Ubb/B2m/Pten/Btg2	4	GO BP	up	NP
GOBP_CIRCADIAN_RHYTHM	GOBP_CIRCADIAN_RHYTHM	GOBP_CIRCADIAN_RHYTHM	3/131	111/5089	0.548904	0.714538	0.571711	Id3/Ass1/Pten	3	GO BP	up	NP
GOBP_DENDRITE_DEVELOPMENT	GOBP_DENDRITE_DEVELOPMENT	GOBP_DENDRITE_DEVELOPMENT	3/131	112/5089	0.555042	0.718123	0.57458	Apoe/Mef2a/Pten	3	GO BP	up	NP
GOBP_PIGMENT_BIOSYNTHETIC_PROCESS	GOBP_PIGMENT_BIOSYNTHETIC_PROCESS	GOBP_PIGMENT_BIOSYNTHETIC_PROCESS	1/131	31/5089	0.555529	0.718123	0.57458	Ddt	1	GO BP	up	NP
GOBP_EMBRYONIC_MORPHOGENESIS	GOBP_EMBRYONIC_MORPHOGENESIS	GOBP_EMBRYONIC_MORPHOGENESIS	6/131	234/5089	0.564057	0.726614	0.581374	Apoa1/Rbp4/Mafb/Dusp1/Zfp36l1/Rps7	6	GO BP	up	NP
GOBP_PALLIUM_DEVELOPMENT	GOBP_PALLIUM_DEVELOPMENT	GOBP_PALLIUM_DEVELOPMENT	2/131	74/5089	0.572837	0.733251	0.586684	Pten/Btg2	2	GO BP	up	NP
GOBP_DEVELOPMENTAL_GROWTH_INVOLVED_IN_MORPHOGENESIS	GOBP_DEVELOPMENTAL_GROWTH_INVOLVED_IN_MORPHOGENESIS	GOBP_DEVELOPMENTAL_GROWTH_INVOLVED_IN_MORPHOGENESIS	3/131	115/5089	0.573161	0.733251	0.586684	Apoe/Nrn1/Hsp90ab1	3	GO BP	up	NP
GOBP_CELL_GROWTH	GOBP_CELL_GROWTH	GOBP_CELL_GROWTH	6/131	239/5089	0.585118	0.734351	0.587564	Apoe/Hamp/F2/Cd38/Nrn1/Hsp90ab1	6	GO BP	up	NP
GOBP_INTERFERON_GAMMA_PRODUCTION	GOBP_INTERFERON_GAMMA_PRODUCTION	GOBP_INTERFERON_GAMMA_PRODUCTION	1/131	34/5089	0.589184	0.734351	0.587564	H2-Q10	1	GO BP	up	NP
GOBP_LYMPHOCYTE_HOMEOSTASIS	GOBP_LYMPHOCYTE_HOMEOSTASIS	GOBP_LYMPHOCYTE_HOMEOSTASIS	1/131	34/5089	0.589184	0.734351	0.587564	Tsc22d3	1	GO BP	up	NP
GOBP_MEIOSIS_I_CELL_CYCLE_PROCESS	GOBP_MEIOSIS_I_CELL_CYCLE_PROCESS	GOBP_MEIOSIS_I_CELL_CYCLE_PROCESS	1/131	34/5089	0.589184	0.734351	0.587564	Ubb	1	GO BP	up	NP
GOBP_REGULATION_OF_MEMBRANE_PERMEABILITY	GOBP_REGULATION_OF_MEMBRANE_PERMEABILITY	GOBP_REGULATION_OF_MEMBRANE_PERMEABILITY	1/131	34/5089	0.589184	0.734351	0.587564	Chchd10	1	GO BP	up	NP
GOBP_REGULATION_OF_MULTICELLULAR_ORGANISM_GROWTH	GOBP_REGULATION_OF_MULTICELLULAR_ORGANISM_GROWTH	GOBP_REGULATION_OF_MULTICELLULAR_ORGANISM_GROWTH	1/131	34/5089	0.589184	0.734351	0.587564	Gamt	1	GO BP	up	NP
GOBP_RESPONSE_TO_ACTIVITY	GOBP_RESPONSE_TO_ACTIVITY	GOBP_RESPONSE_TO_ACTIVITY	1/131	34/5089	0.589184	0.734351	0.587564	Cat	1	GO BP	up	NP
GOBP_IMMUNE_RESPONSE_REGULATING_SIGNALING_PATHWAY	GOBP_IMMUNE_RESPONSE_REGULATING_SIGNALING_PATHWAY	GOBP_IMMUNE_RESPONSE_REGULATING_SIGNALING_PATHWAY	5/131	200/5089	0.591576	0.734351	0.587564	Cd81/Colec12/H2-Q10/Cd38/Appl2	5	GO BP	up	NP
GOBP_MULTICELLULAR_ORGANISM_REPRODUCTION	GOBP_MULTICELLULAR_ORGANISM_REPRODUCTION	GOBP_MULTICELLULAR_ORGANISM_REPRODUCTION	7/131	283/5089	0.59943	0.734351	0.587564	Ubb/Rgn/Hspa5/Pten/Gjb2/Gamt/Hpgd	7	GO BP	up	NP
GOBP_LENS_DEVELOPMENT_IN_CAMERA_TYPE_EYE	GOBP_LENS_DEVELOPMENT_IN_CAMERA_TYPE_EYE	GOBP_LENS_DEVELOPMENT_IN_CAMERA_TYPE_EYE	1/131	35/5089	0.59983	0.734351	0.587564	Maf	1	GO BP	up	NP
GOBP_REGULATION_OF_HEART_RATE	GOBP_REGULATION_OF_HEART_RATE	GOBP_REGULATION_OF_HEART_RATE	1/131	35/5089	0.59983	0.734351	0.587564	Ank2	1	GO BP	up	NP
GOBP_REGULATION_OF_LIPID_STORAGE	GOBP_REGULATION_OF_LIPID_STORAGE	GOBP_REGULATION_OF_LIPID_STORAGE	1/131	35/5089	0.59983	0.734351	0.587564	Apoc4	1	GO BP	up	NP
GOBP_REGULATION_OF_ACTIN_FILAMENT_BASED_PROCESS	GOBP_REGULATION_OF_ACTIN_FILAMENT_BASED_PROCESS	GOBP_REGULATION_OF_ACTIN_FILAMENT_BASED_PROCESS	5/131	202/5089	0.600535	0.734351	0.587564	Apoa1/Tmsb4x/Ssh2/Mtss1/Ank2	5	GO BP	up	NP
GOBP_MEIOTIC_CELL_CYCLE	GOBP_MEIOTIC_CELL_CYCLE	GOBP_MEIOTIC_CELL_CYCLE	2/131	78/5089	0.601732	0.734351	0.587564	Ubb/Dusp1	2	GO BP	up	NP
GOBP_REGULATION_OF_SYNAPSE_STRUCTURE_OR_ACTIVITY	GOBP_REGULATION_OF_SYNAPSE_STRUCTURE_OR_ACTIVITY	GOBP_REGULATION_OF_SYNAPSE_STRUCTURE_OR_ACTIVITY	2/131	79/5089	0.608724	0.740448	0.592443	Apoe/Pten	2	GO BP	up	NP
GOBP_ER_NUCLEUS_SIGNALING_PATHWAY	GOBP_ER_NUCLEUS_SIGNALING_PATHWAY	GOBP_ER_NUCLEUS_SIGNALING_PATHWAY	1/131	37/5089	0.620308	0.749746	0.599882	Hspa5	1	GO BP	up	NP
GOBP_CARDIAC_CHAMBER_DEVELOPMENT	GOBP_CARDIAC_CHAMBER_DEVELOPMENT	GOBP_CARDIAC_CHAMBER_DEVELOPMENT	2/131	81/5089	0.622431	0.749746	0.599882	Rbp4/Ank2	2	GO BP	up	NP
GOBP_REGULATION_OF_VIRAL_PROCESS	GOBP_REGULATION_OF_VIRAL_PROCESS	GOBP_REGULATION_OF_VIRAL_PROCESS	2/131	81/5089	0.622431	0.749746	0.599882	Zfp36/Ppia	2	GO BP	up	NP
GOBP_CARBOHYDRATE_HOMEOSTASIS	GOBP_CARBOHYDRATE_HOMEOSTASIS	GOBP_CARBOHYDRATE_HOMEOSTASIS	3/131	124/5089	0.624725	0.750075	0.600145	Rbp4/Appl2/Gpx1	3	GO BP	up	NP
GOBP_MIDBRAIN_DEVELOPMENT	GOBP_MIDBRAIN_DEVELOPMENT	GOBP_MIDBRAIN_DEVELOPMENT	1/131	38/5089	0.630153	0.751726	0.601466	Hspa5	1	GO BP	up	NP
GOBP_SINGLE_FERTILIZATION	GOBP_SINGLE_FERTILIZATION	GOBP_SINGLE_FERTILIZATION	1/131	38/5089	0.630153	0.751726	0.601466	Fetub	1	GO BP	up	NP
GOBP_TRANSLATIONAL_INITIATION	GOBP_TRANSLATIONAL_INITIATION	GOBP_TRANSLATIONAL_INITIATION	2/131	83/5089	0.635767	0.755993	0.60488	Eif1/Rps5	2	GO BP	up	NP
GOBP_RNA_LOCALIZATION	GOBP_RNA_LOCALIZATION	GOBP_RNA_LOCALIZATION	3/131	129/5089	0.651493	0.772217	0.617862	Srsf7/Zfp36l1/Zfp36	3	GO BP	up	NP
GOBP_REGULATION_OF_RESPONSE_TO_CYTOKINE_STIMULUS	GOBP_REGULATION_OF_RESPONSE_TO_CYTOKINE_STIMULUS	GOBP_REGULATION_OF_RESPONSE_TO_CYTOKINE_STIMULUS	2/131	86/5089	0.655083	0.774	0.619288	Apoa1/Hsp90ab1	2	GO BP	up	NP
GOBP_FIBROBLAST_PROLIFERATION	GOBP_FIBROBLAST_PROLIFERATION	GOBP_FIBROBLAST_PROLIFERATION	1/131	43/5089	0.675707	0.795833	0.636757	Fth1	1	GO BP	up	NP
GOBP_LEUKOCYTE_HOMEOSTASIS	GOBP_LEUKOCYTE_HOMEOSTASIS	GOBP_LEUKOCYTE_HOMEOSTASIS	1/131	45/5089	0.692328	0.812828	0.650355	Tsc22d3	1	GO BP	up	NP
GOBP_ADULT_BEHAVIOR	GOBP_ADULT_BEHAVIOR	GOBP_ADULT_BEHAVIOR	1/131	46/5089	0.700319	0.817039	0.653724	Pten	1	GO BP	up	NP
GOBP_DEMETHYLATION	GOBP_DEMETHYLATION	GOBP_DEMETHYLATION	1/131	46/5089	0.700319	0.817039	0.653724	Cyp3a11	1	GO BP	up	NP
GOBP_CHROMOSOME_SEPARATION	GOBP_CHROMOSOME_SEPARATION	GOBP_CHROMOSOME_SEPARATION	1/131	47/5089	0.708104	0.820958	0.656859	Dusp1	1	GO BP	up	NP
GOBP_POST_EMBRYONIC_DEVELOPMENT	GOBP_POST_EMBRYONIC_DEVELOPMENT	GOBP_POST_EMBRYONIC_DEVELOPMENT	1/131	47/5089	0.708104	0.820958	0.656859	Selenop	1	GO BP	up	NP
GOBP_CIRCADIAN_REGULATION_OF_GENE_EXPRESSION	GOBP_CIRCADIAN_REGULATION_OF_GENE_EXPRESSION	GOBP_CIRCADIAN_REGULATION_OF_GENE_EXPRESSION	1/131	48/5089	0.715688	0.822887	0.658403	Id3	1	GO BP	up	NP
GOBP_CELLULAR_RESPONSE_TO_EXTRACELLULAR_STIMULUS	GOBP_CELLULAR_RESPONSE_TO_EXTRACELLULAR_STIMULUS	GOBP_CELLULAR_RESPONSE_TO_EXTRACELLULAR_STIMULUS	3/131	143/5089	0.719148	0.822887	0.658403	Alb/Vcam1/Hspa5	3	GO BP	up	NP
GOBP_PATTERN_SPECIFICATION_PROCESS	GOBP_PATTERN_SPECIFICATION_PROCESS	GOBP_PATTERN_SPECIFICATION_PROCESS	3/131	143/5089	0.719148	0.822887	0.658403	C1qa/Mafb/Btg2	3	GO BP	up	NP
GOBP_REGULATION_OF_TRANS_SYNAPTIC_SIGNALING	GOBP_REGULATION_OF_TRANS_SYNAPTIC_SIGNALING	GOBP_REGULATION_OF_TRANS_SYNAPTIC_SIGNALING	3/131	143/5089	0.719148	0.822887	0.658403	Apoe/Pten/Cd38	3	GO BP	up	NP
GOBP_FORMATION_OF_PRIMARY_GERM_LAYER	GOBP_FORMATION_OF_PRIMARY_GERM_LAYER	GOBP_FORMATION_OF_PRIMARY_GERM_LAYER	1/131	49/5089	0.723076	0.822887	0.658403	Dusp1	1	GO BP	up	NP
GOBP_REGULATION_OF_VIRAL_GENOME_REPLICATION	GOBP_REGULATION_OF_VIRAL_GENOME_REPLICATION	GOBP_REGULATION_OF_VIRAL_GENOME_REPLICATION	1/131	49/5089	0.723076	0.822887	0.658403	Ppia	1	GO BP	up	NP
GOBP_MEMBRANE_DOCKING	GOBP_MEMBRANE_DOCKING	GOBP_MEMBRANE_DOCKING	1/131	50/5089	0.730274	0.828254	0.662697	Vcam1	1	GO BP	up	NP
GOBP_MONOSACCHARIDE_METABOLIC_PROCESS	GOBP_MONOSACCHARIDE_METABOLIC_PROCESS	GOBP_MONOSACCHARIDE_METABOLIC_PROCESS	3/131	146/5089	0.732257	0.828254	0.662697	Rbp4/Rgn/Aldob	3	GO BP	up	NP
GOBP_RETINA_DEVELOPMENT_IN_CAMERA_TYPE_EYE	GOBP_RETINA_DEVELOPMENT_IN_CAMERA_TYPE_EYE	GOBP_RETINA_DEVELOPMENT_IN_CAMERA_TYPE_EYE	1/131	52/5089	0.744117	0.839111	0.671384	Rbp4	1	GO BP	up	NP
GOBP_EXOCYTOSIS	GOBP_EXOCYTOSIS	GOBP_EXOCYTOSIS	3/131	152/5089	0.75704	0.848766	0.679109	Fgb/Fgg/Fga	3	GO BP	up	NP
GOBP_FERTILIZATION	GOBP_FERTILIZATION	GOBP_FERTILIZATION	1/131	54/5089	0.757255	0.848766	0.679109	Fetub	1	GO BP	up	NP
GOBP_MEIOTIC_CELL_CYCLE_PROCESS	GOBP_MEIOTIC_CELL_CYCLE_PROCESS	GOBP_MEIOTIC_CELL_CYCLE_PROCESS	1/131	55/5089	0.763571	0.85244	0.682049	Ubb	1	GO BP	up	NP
GOBP_TELENCEPHALON_DEVELOPMENT	GOBP_TELENCEPHALON_DEVELOPMENT	GOBP_TELENCEPHALON_DEVELOPMENT	2/131	107/5089	0.76827	0.85244	0.682049	Pten/Btg2	2	GO BP	up	NP
GOBP_NUCLEOBASE_CONTAINING_SMALL_MOLECULE_METABOLIC_PROCESS	GOBP_NUCLEOBASE_CONTAINING_SMALL_MOLECULE_METABOLIC_PROCESS	GOBP_NUCLEOBASE_CONTAINING_SMALL_MOLECULE_METABOLIC_PROCESS	6/131	291/5089	0.769122	0.85244	0.682049	Ttr/Tmsb4x/Tdo2/mt-Atp6/Aldob/mt-Co2	6	GO BP	up	NP
GOBP_CARDIAC_CHAMBER_MORPHOGENESIS	GOBP_CARDIAC_CHAMBER_MORPHOGENESIS	GOBP_CARDIAC_CHAMBER_MORPHOGENESIS	1/131	56/5089	0.769723	0.85244	0.682049	Rbp4	1	GO BP	up	NP
GOBP_THIOESTER_METABOLIC_PROCESS	GOBP_THIOESTER_METABOLIC_PROCESS	GOBP_THIOESTER_METABOLIC_PROCESS	1/131	57/5089	0.775717	0.856521	0.685314	Tdo2	1	GO BP	up	NP
GOBP_ACTIN_FILAMENT_BASED_MOVEMENT	GOBP_ACTIN_FILAMENT_BASED_MOVEMENT	GOBP_ACTIN_FILAMENT_BASED_MOVEMENT	1/131	58/5089	0.781556	0.857862	0.686387	Ank2	1	GO BP	up	NP
GOBP_NEPHRON_DEVELOPMENT	GOBP_NEPHRON_DEVELOPMENT	GOBP_NEPHRON_DEVELOPMENT	1/131	58/5089	0.781556	0.857862	0.686387	Mtss1	1	GO BP	up	NP
GOBP_CARDIAC_SEPTUM_DEVELOPMENT	GOBP_CARDIAC_SEPTUM_DEVELOPMENT	GOBP_CARDIAC_SEPTUM_DEVELOPMENT	1/131	60/5089	0.792785	0.864048	0.691336	Ank2	1	GO BP	up	NP
GOBP_RESPONSE_TO_HEAT	GOBP_RESPONSE_TO_HEAT	GOBP_RESPONSE_TO_HEAT	1/131	60/5089	0.792785	0.864048	0.691336	Hsp90ab1	1	GO BP	up	NP
GOBP_CELL_CYCLE_PHASE_TRANSITION	GOBP_CELL_CYCLE_PHASE_TRANSITION	GOBP_CELL_CYCLE_PHASE_TRANSITION	5/131	255/5089	0.794179	0.864048	0.691336	Dusp1/Zfp36l1/Ccnd3/Pten/Appl2	5	GO BP	up	NP
GOBP_MICROTUBULE_BASED_MOVEMENT	GOBP_MICROTUBULE_BASED_MOVEMENT	GOBP_MICROTUBULE_BASED_MOVEMENT	2/131	117/5089	0.809899	0.878575	0.70296	Ubb/Rgn	2	GO BP	up	NP
GOBP_VIRAL_GENE_EXPRESSION	GOBP_VIRAL_GENE_EXPRESSION	GOBP_VIRAL_GENE_EXPRESSION	1/131	65/5089	0.818413	0.885223	0.708279	Zfp36	1	GO BP	up	NP
GOBP_MITOCHONDRIAL_TRANSMEMBRANE_TRANSPORT	GOBP_MITOCHONDRIAL_TRANSMEMBRANE_TRANSPORT	GOBP_MITOCHONDRIAL_TRANSMEMBRANE_TRANSPORT	1/131	68/5089	0.832253	0.895297	0.71634	mt-Atp6	1	GO BP	up	NP
GOBP_CELLULAR_RESPONSE_TO_EXTERNAL_STIMULUS	GOBP_CELLULAR_RESPONSE_TO_EXTERNAL_STIMULUS	GOBP_CELLULAR_RESPONSE_TO_EXTERNAL_STIMULUS	3/131	174/5089	0.832554	0.895297	0.71634	Alb/Vcam1/Hspa5	3	GO BP	up	NP
GOBP_TUBE_FORMATION	GOBP_TUBE_FORMATION	GOBP_TUBE_FORMATION	1/131	71/5089	0.845046	0.906104	0.724986	Rps7	1	GO BP	up	NP
GOBP_MALE_SEX_DIFFERENTIATION	GOBP_MALE_SEX_DIFFERENTIATION	GOBP_MALE_SEX_DIFFERENTIATION	1/131	73/5089	0.853032	0.912031	0.729728	Ubb	1	GO BP	up	NP
GOBP_GAMETE_GENERATION	GOBP_GAMETE_GENERATION	GOBP_GAMETE_GENERATION	4/131	237/5089	0.867125	0.922502	0.738106	Ubb/Rgn/Gamt/Hpgd	4	GO BP	up	NP
GOBP_MAINTENANCE_OF_CELL_NUMBER	GOBP_MAINTENANCE_OF_CELL_NUMBER	GOBP_MAINTENANCE_OF_CELL_NUMBER	1/131	77/5089	0.867798	0.922502	0.738106	Tpt1	1	GO BP	up	NP
GOBP_REGULATION_OF_CELLULAR_RESPONSE_TO_GROWTH_FACTOR_STIMULUS	GOBP_REGULATION_OF_CELLULAR_RESPONSE_TO_GROWTH_FACTOR_STIMULUS	GOBP_REGULATION_OF_CELLULAR_RESPONSE_TO_GROWTH_FACTOR_STIMULUS	2/131	136/5089	0.871135	0.923403	0.738827	Hspa5/Hsp90ab1	2	GO BP	up	NP
GOBP_CELL_FATE_COMMITMENT	GOBP_CELL_FATE_COMMITMENT	GOBP_CELL_FATE_COMMITMENT	1/131	81/5089	0.881091	0.930303	0.744348	Ctsl	1	GO BP	up	NP
GOBP_CARBOHYDRATE_METABOLIC_PROCESS	GOBP_CARBOHYDRATE_METABOLIC_PROCESS	GOBP_CARBOHYDRATE_METABOLIC_PROCESS	5/131	294/5089	0.883405	0.930303	0.744348	Rbp4/Rgn/Slc3a2/Pten/Aldob	5	GO BP	up	NP
GOBP_VIRAL_GENOME_REPLICATION	GOBP_VIRAL_GENOME_REPLICATION	GOBP_VIRAL_GENOME_REPLICATION	1/131	83/5089	0.887231	0.930303	0.744348	Ppia	1	GO BP	up	NP
GOBP_METHYLATION	GOBP_METHYLATION	GOBP_METHYLATION	3/131	197/5089	0.889198	0.930303	0.744348	Bhmt/Gamt/Btg2	3	GO BP	up	NP
GOBP_VESICLE_MEDIATED_TRANSPORT_IN_SYNAPSE	GOBP_VESICLE_MEDIATED_TRANSPORT_IN_SYNAPSE	GOBP_VESICLE_MEDIATED_TRANSPORT_IN_SYNAPSE	1/131	84/5089	0.890182	0.930303	0.744348	Pten	1	GO BP	up	NP
GOBP_ESTABLISHMENT_OF_CELL_POLARITY	GOBP_ESTABLISHMENT_OF_CELL_POLARITY	GOBP_ESTABLISHMENT_OF_CELL_POLARITY	1/131	89/5089	0.903826	0.941889	0.753618	Hsp90ab1	1	GO BP	up	NP
GOBP_REGULATION_OF_CELL_SHAPE	GOBP_REGULATION_OF_CELL_SHAPE	GOBP_REGULATION_OF_CELL_SHAPE	1/131	90/5089	0.906346	0.941889	0.753618	F2	1	GO BP	up	NP
GOBP_HORMONE_MEDIATED_SIGNALING_PATHWAY	GOBP_HORMONE_MEDIATED_SIGNALING_PATHWAY	GOBP_HORMONE_MEDIATED_SIGNALING_PATHWAY	1/131	104/5089	0.935456	0.969425	0.77565	Appl2	1	GO BP	up	NP
GOBP_REGULATION_OF_MICROTUBULE_BASED_PROCESS	GOBP_REGULATION_OF_MICROTUBULE_BASED_PROCESS	GOBP_REGULATION_OF_MICROTUBULE_BASED_PROCESS	1/131	109/5089	0.943505	0.974642	0.779824	Rgn	1	GO BP	up	NP
GOBP_ORGANELLE_LOCALIZATION	GOBP_ORGANELLE_LOCALIZATION	GOBP_ORGANELLE_LOCALIZATION	4/131	289/5089	0.945744	0.974642	0.779824	Alb/Ubb/Mef2a/Pten	4	GO BP	up	NP
GOBP_CELLULAR_PROCESS_INVOLVED_IN_REPRODUCTION_IN_MULTICELLULAR_ORGANISM	GOBP_CELLULAR_PROCESS_INVOLVED_IN_REPRODUCTION_IN_MULTICELLULAR_ORGANISM	GOBP_CELLULAR_PROCESS_INVOLVED_IN_REPRODUCTION_IN_MULTICELLULAR_ORGANISM	1/131	116/5089	0.953128	0.978089	0.782583	Ubb	1	GO BP	up	NP
GOBP_VESICLE_LOCALIZATION	GOBP_VESICLE_LOCALIZATION	GOBP_VESICLE_LOCALIZATION	1/131	117/5089	0.954362	0.978089	0.782583	Pten	1	GO BP	up	NP
GOBP_CELL_ACTIVATION_INVOLVED_IN_IMMUNE_RESPONSE	GOBP_CELL_ACTIVATION_INVOLVED_IN_IMMUNE_RESPONSE	GOBP_CELL_ACTIVATION_INVOLVED_IN_IMMUNE_RESPONSE	1/131	127/5089	0.965065	0.984155	0.787436	Cd81	1	GO BP	up	NP
GOBP_ESTABLISHMENT_OR_MAINTENANCE_OF_CELL_POLARITY	GOBP_ESTABLISHMENT_OR_MAINTENANCE_OF_CELL_POLARITY	GOBP_ESTABLISHMENT_OR_MAINTENANCE_OF_CELL_POLARITY	1/131	130/5089	0.96776	0.984155	0.787436	Hsp90ab1	1	GO BP	up	NP
GOBP_TISSUE_MORPHOGENESIS	GOBP_TISSUE_MORPHOGENESIS	GOBP_TISSUE_MORPHOGENESIS	3/131	261/5089	0.968239	0.984155	0.787436	Rps7/Mtss1/Pten	3	GO BP	up	NP
GOBP_ENDOSOMAL_TRANSPORT	GOBP_ENDOSOMAL_TRANSPORT	GOBP_ENDOSOMAL_TRANSPORT	1/131	145/5089	0.978436	0.989125	0.791412	Washc4	1	GO BP	up	NP
GOBP_CHROMOSOME_SEGREGATION	GOBP_CHROMOSOME_SEGREGATION	GOBP_CHROMOSOME_SEGREGATION	1/131	146/5089	0.979007	0.989125	0.791412	Dusp1	1	GO BP	up	NP
GOBP_CELL_DIVISION	GOBP_CELL_DIVISION	GOBP_CELL_DIVISION	3/131	286/5089	0.981127	0.989125	0.791412	Cat/Ccnd3/Txnip	3	GO BP	up	NP
GOBP_INTRACELLULAR_RECEPTOR_SIGNALING_PATHWAY	GOBP_INTRACELLULAR_RECEPTOR_SIGNALING_PATHWAY	GOBP_INTRACELLULAR_RECEPTOR_SIGNALING_PATHWAY	1/131	164/5089	0.987066	0.992416	0.794045	Klf2	1	GO BP	up	NP
GOBP_RESPONSE_TO_VIRUS	GOBP_RESPONSE_TO_VIRUS	GOBP_RESPONSE_TO_VIRUS	1/131	177/5089	0.990894	0.993572	0.79497	Tpt1	1	GO BP	up	NP
GOBP_ESTABLISHMENT_OF_ORGANELLE_LOCALIZATION	GOBP_ESTABLISHMENT_OF_ORGANELLE_LOCALIZATION	GOBP_ESTABLISHMENT_OF_ORGANELLE_LOCALIZATION	1/131	216/5089	0.99684	0.99684	0.797585	Ubb	1	GO BP	up	NP
HALLMARK_INTERFERON_GAMMA_RESPONSE1	HALLMARK_INTERFERON_GAMMA_RESPONSE	HALLMARK_INTERFERON_GAMMA_RESPONSE	15311	116/2342	2.89538515002641e-07	9.84430951008978e-06	8.53376675797256e-06	Stat1/Stat2/Gbp4/Cd74/Nlrc5/Parp14/Tnfaip2/Rnf213/Casp7/Gbp8/Helz2/Tap1	12	HALLMARK	down	NP
HALLMARK_INTERFERON_ALPHA_RESPONSE1	HALLMARK_INTERFERON_ALPHA_RESPONSE	HALLMARK_INTERFERON_ALPHA_RESPONSE	15128	60/2342	0.000491085	0.00834845	0.00723704	Stat2/Cd74/Parp14/Uba7/Helz2/Tap1	6	HALLMARK	down	NP
HALLMARK_IL6_JAK_STAT3_SIGNALING1	HALLMARK_IL6_JAK_STAT3_SIGNALING	HALLMARK_IL6_JAK_STAT3_SIGNALING	15067	43/2342	0.00609336	0.0690581	0.0598646	Lepr/Stat1/Stat2/Cd44	4	HALLMARK	down	NP
HALLMARK_ALLOGRAFT_REJECTION1	HALLMARK_ALLOGRAFT_REJECTION	HALLMARK_ALLOGRAFT_REJECTION	15097	83/2342	0.0136086	0.115673	0.100274	Egfr/Stat1/Cd74/Cfp/Tap1	5	HALLMARK	down	NP
HALLMARK_APOPTOSIS1	HALLMARK_APOPTOSIS	HALLMARK_APOPTOSIS	15097	91/2342	0.0196682	0.133744	0.115939	App/Cd44/Dpyd/Casp7/Tap1	5	HALLMARK	down	NP
HALLMARK_KRAS_SIGNALING_DN1	HALLMARK_KRAS_SIGNALING_DN	HALLMARK_KRAS_SIGNALING_DN	15036	40/2342	0.0314287	0.178096	0.154387	Ptprj/Camk1d/Thrb	3	HALLMARK	down	NP
HALLMARK_MYOGENESIS1	HALLMARK_MYOGENESIS	HALLMARK_MYOGENESIS	15036	72/2342	0.129692	0.629933	0.546072	Plxnb2/App/Svil	3	HALLMARK	down	NP
HALLMARK_UV_RESPONSE_UP1	HALLMARK_UV_RESPONSE_UP	HALLMARK_UV_RESPONSE_UP	15036	79/2342	0.15842	0.651792	0.565021	Arrb2/Grina/Tap1	3	HALLMARK	down	NP
HALLMARK_ANGIOGENESIS1	HALLMARK_ANGIOGENESIS	HALLMARK_ANGIOGENESIS	14977	15/2342	0.233349	0.651792	0.565021	App	1	HALLMARK	down	NP
HALLMARK_TNFA_SIGNALING_VIA_NFKB1	HALLMARK_TNFA_SIGNALING_VIA_NFKB	HALLMARK_TNFA_SIGNALING_VIA_NFKB	15036	99/2342	0.249206	0.651792	0.565021	Cd44/Tnfaip2/Tap1	3	HALLMARK	down	NP
HALLMARK_ESTROGEN_RESPONSE_EARLY1	HALLMARK_ESTROGEN_RESPONSE_EARLY	HALLMARK_ESTROGEN_RESPONSE_EARLY	15036	100/2342	0.253979	0.651792	0.565021	Gab2/Cd44/Svil	3	HALLMARK	down	NP
HALLMARK_HYPOXIA1	HALLMARK_HYPOXIA	HALLMARK_HYPOXIA	15036	100/2342	0.253979	0.651792	0.565021	Egfr/Selenbp2/Ext1	3	HALLMARK	down	NP
HALLMARK_APICAL_SURFACE	HALLMARK_APICAL_SURFACE	HALLMARK_APICAL_SURFACE	14977	17/2342	0.260133	0.651792	0.565021	App	1	HALLMARK	down	NP
HALLMARK_P53_PATHWAY1	HALLMARK_P53_PATHWAY	HALLMARK_P53_PATHWAY	15036	103/2342	0.268385	0.651792	0.565021	Plxnb2/App/Tap1	3	HALLMARK	down	NP
HALLMARK_GLYCOLYSIS1	HALLMARK_GLYCOLYSIS	HALLMARK_GLYCOLYSIS	15036	107/2342	0.287756	0.652248	0.565416	Egfr/Cd44/Ext1	3	HALLMARK	down	NP
HALLMARK_PI3K_AKT_MTOR_SIGNALING1	HALLMARK_PI3K_AKT_MTOR_SIGNALING	HALLMARK_PI3K_AKT_MTOR_SIGNALING	15008	70/2342	0.348395	0.740339	0.64178	Egfr/Stat2	2	HALLMARK	down	NP
HALLMARK_UNFOLDED_PROTEIN_RESPONSE1	HALLMARK_UNFOLDED_PROTEIN_RESPONSE	HALLMARK_UNFOLDED_PROTEIN_RESPONSE	15008	76/2342	0.386786	0.773573	0.670589	Arfgap1/Eif4a1	2	HALLMARK	down	NP
HALLMARK_REACTIVE_OXYGEN_SPECIES_PATHWAY1	HALLMARK_REACTIVE_OXYGEN_SPECIES_PATHWAY	HALLMARK_REACTIVE_OXYGEN_SPECIES_PATHWAY	14977	33/2342	0.443942	0.838557	0.726923	Fes	1	HALLMARK	down	NP
HALLMARK_IL2_STAT5_SIGNALING1	HALLMARK_IL2_STAT5_SIGNALING	HALLMARK_IL2_STAT5_SIGNALING	15008	96/2342	0.50698	0.907227	0.786451	St3gal4/Cd44	2	HALLMARK	down	NP
HALLMARK_COMPLEMENT1	HALLMARK_COMPLEMENT	HALLMARK_COMPLEMENT	15008	113/2342	0.596991	0.935305	0.810791	Casp7/Cblb	2	HALLMARK	down	NP
HALLMARK_EPITHELIAL_MESENCHYMAL_TRANSITION1	HALLMARK_EPITHELIAL_MESENCHYMAL_TRANSITION	HALLMARK_EPITHELIAL_MESENCHYMAL_TRANSITION	14977	76/2342	0.744475	0.935305	0.810791	Cd44	1	HALLMARK	down	NP
HALLMARK_INFLAMMATORY_RESPONSE1	HALLMARK_INFLAMMATORY_RESPONSE	HALLMARK_INFLAMMATORY_RESPONSE	14977	76/2342	0.744475	0.935305	0.810791	Axl	1	HALLMARK	down	NP
HALLMARK_ANDROGEN_RESPONSE1	HALLMARK_ANDROGEN_RESPONSE	HALLMARK_ANDROGEN_RESPONSE	14977	78/2342	0.75364	0.935305	0.810791	Stk39	1	HALLMARK	down	NP
HALLMARK_PROTEIN_SECRETION	HALLMARK_PROTEIN_SECRETION	HALLMARK_PROTEIN_SECRETION	14977	81/2342	0.766789	0.935305	0.810791	Egfr	1	HALLMARK	down	NP
HALLMARK_OXIDATIVE_PHOSPHORYLATION1	HALLMARK_OXIDATIVE_PHOSPHORYLATION	HALLMARK_OXIDATIVE_PHOSPHORYLATION	15008	155/2342	0.766912	0.935305	0.810791	Tcirg1/Casp7	2	HALLMARK	down	NP
HALLMARK_BILE_ACID_METABOLISM1	HALLMARK_BILE_ACID_METABOLISM	HALLMARK_BILE_ACID_METABOLISM	14977	87/2342	0.791066	0.935305	0.810791	Cyp7b1	1	HALLMARK	down	NP
HALLMARK_ESTROGEN_RESPONSE_LATE1	HALLMARK_ESTROGEN_RESPONSE_LATE	HALLMARK_ESTROGEN_RESPONSE_LATE	14977	91/2342	0.805861	0.935305	0.810791	Cd44	1	HALLMARK	down	NP
HALLMARK_APICAL_JUNCTION1	HALLMARK_APICAL_JUNCTION	HALLMARK_APICAL_JUNCTION	14977	92/2342	0.809397	0.935305	0.810791	Egfr	1	HALLMARK	down	NP
HALLMARK_UV_RESPONSE_DN1	HALLMARK_UV_RESPONSE_DN	HALLMARK_UV_RESPONSE_DN	14977	106/2342	0.852773	0.935305	0.810791	Pik3cd	1	HALLMARK	down	NP
HALLMARK_HEME_METABOLISM1	HALLMARK_HEME_METABOLISM	HALLMARK_HEME_METABOLISM	14977	117/2342	0.879946	0.935305	0.810791	Selenbp2	1	HALLMARK	down	NP
HALLMARK_MTORC1_SIGNALING1	HALLMARK_MTORC1_SIGNALING	HALLMARK_MTORC1_SIGNALING	14977	127/2342	0.900359	0.935305	0.810791	Cfp	1	HALLMARK	down	NP
HALLMARK_MITOTIC_SPINDLE1	HALLMARK_MITOTIC_SPINDLE	HALLMARK_MITOTIC_SPINDLE	14977	133/2342	0.910937	0.935305	0.810791	Mid1	1	HALLMARK	down	NP
HALLMARK_MYC_TARGETS_V11	HALLMARK_MYC_TARGETS_V1	HALLMARK_MYC_TARGETS_V1	14977	143/2342	0.926182	0.935305	0.810791	Eif4a1	1	HALLMARK	down	NP
HALLMARK_ADIPOGENESIS1	HALLMARK_ADIPOGENESIS	HALLMARK_ADIPOGENESIS	14977	150/2342	0.935305	0.935305	0.810791	Gphn	1	HALLMARK	down	NP
REACTOME_INTERFERON_SIGNALING1	REACTOME_INTERFERON_SIGNALING	REACTOME_INTERFERON_SIGNALING	21824	106/4668	5.90447828036131e-07	0.00017323	0.000155878	Mid1/Stat1/Stat2/Gbp4/Cd44/Eif4a1/Uba7/Gbp7/Gbp8/H2-Ab1	10	REACTOME	down	NP
REACTOME_INTERFERON_GAMMA_SIGNALING1	REACTOME_INTERFERON_GAMMA_SIGNALING	REACTOME_INTERFERON_GAMMA_SIGNALING	21732	45/4668	1.11761531379621e-06	0.00017323	0.000155878	Mid1/Stat1/Gbp4/Cd44/Gbp7/Gbp8/H2-Ab1	7	REACTOME	down	NP
REACTOME_NEGATIVE_REGULATION_OF_THE_PI3K_AKT_NETWORK1	REACTOME_NEGATIVE_REGULATION_OF_THE_PI3K_AKT_NETWORK	REACTOME_NEGATIVE_REGULATION_OF_THE_PI3K_AKT_NETWORK	21671	58/4668	0.000745537	0.0770388	0.0693218	Phlpp1/Egfr/Gab2/Pik3ap1/Pik3cd	5	REACTOME	down	NP
REACTOME_CONSTITUTIVE_SIGNALING_BY_ABERRANT_PI3K_IN_CANCER	REACTOME_CONSTITUTIVE_SIGNALING_BY_ABERRANT_PI3K_IN_CANCER	REACTOME_CONSTITUTIVE_SIGNALING_BY_ABERRANT_PI3K_IN_CANCER	21641	36/4668	0.00100293	0.0777272	0.0699413	Egfr/Gab2/Pik3ap1/Pik3cd	4	REACTOME	down	NP
REACTOME_ANTIGEN_ACTIVATES_B_CELL_RECEPTOR_BCR_LEADING_TO_GENERATION_OF_SECOND_MESSENGERS	REACTOME_ANTIGEN_ACTIVATES_B_CELL_RECEPTOR_BCR_LEADING_TO_GENERATION_OF_SECOND_MESSENGERS	REACTOME_ANTIGEN_ACTIVATES_B_CELL_RECEPTOR_BCR_LEADING_TO_GENERATION_OF_SECOND_MESSENGERS	21610	18/4668	0.00136772	0.0847989	0.0763046	Itpr1/Pik3ap1/Pik3cd	3	REACTOME	down	NP
REACTOME_DDX58_IFIH1_MEDIATED_INDUCTION_OF_INTERFERON_ALPHA_BETA1	REACTOME_DDX58_IFIH1_MEDIATED_INDUCTION_OF_INTERFERON_ALPHA_BETA	REACTOME_DDX58_IFIH1_MEDIATED_INDUCTION_OF_INTERFERON_ALPHA_BETA	21641	48/4668	0.00295981	0.125743	0.113147	App/Nlrc5/Ikbke/Uba7	4	REACTOME	down	NP
REACTOME_INTERLEUKIN_2_FAMILY_SIGNALING1	REACTOME_INTERLEUKIN_2_FAMILY_SIGNALING	REACTOME_INTERLEUKIN_2_FAMILY_SIGNALING	21610	24/4668	0.00321468	0.125743	0.113147	Stat1/Gab2/Pik3cd	3	REACTOME	down	NP
REACTOME_SIGNALING_BY_NOTCH5	REACTOME_SIGNALING_BY_NOTCH	REACTOME_SIGNALING_BY_NOTCH	21702	120/4668	0.003772	0.125743	0.113147	Arrb2/Egfr/Stat1/St3gal4/Maml3/Nbea	6	REACTOME	down	NP
REACTOME_SARS_COV_2_INFECTION1	REACTOME_SARS_COV_2_INFECTION	REACTOME_SARS_COV_2_INFECTION	21641	52/4668	0.00396654	0.125743	0.113147	Man2a1/St3gal4/Uvrag/Parp14	4	REACTOME	down	NP
REACTOME_NEGATIVE_REGULATORS_OF_DDX58_IFIH1_SIGNALING1	REACTOME_NEGATIVE_REGULATORS_OF_DDX58_IFIH1_SIGNALING	REACTOME_NEGATIVE_REGULATORS_OF_DDX58_IFIH1_SIGNALING	21610	26/4668	0.00405623	0.125743	0.113147	Nlrc5/Ikbke/Uba7	3	REACTOME	down	NP
REACTOME_PI3K_AKT_SIGNALING_IN_CANCER1	REACTOME_PI3K_AKT_SIGNALING_IN_CANCER	REACTOME_PI3K_AKT_SIGNALING_IN_CANCER	21641	55/4668	0.00485856	0.136858	0.123149	Egfr/Gab2/Pik3ap1/Pik3cd	4	REACTOME	down	NP
REACTOME_SIGNALING_BY_SCF_KIT	REACTOME_SIGNALING_BY_SCF_KIT	REACTOME_SIGNALING_BY_SCF_KIT	21610	29/4668	0.00554962	0.136858	0.123149	Stat1/Gab2/Fes	3	REACTOME	down	NP
REACTOME_SIGNALING_BY_NOTCH31	REACTOME_SIGNALING_BY_NOTCH3	REACTOME_SIGNALING_BY_NOTCH3	21610	30/4668	0.00611138	0.136858	0.123149	Egfr/Stat1/Maml3	3	REACTOME	down	NP
REACTOME_INTERLEUKIN_20_FAMILY_SIGNALING	REACTOME_INTERLEUKIN_20_FAMILY_SIGNALING	REACTOME_INTERLEUKIN_20_FAMILY_SIGNALING	21582	4668-10-01	0.00662216	0.136858	0.123149	Stat1/Stat2	2	REACTOME	down	NP
REACTOME_N_GLYCAN_ANTENNAE_ELONGATION_IN_THE_MEDIAL_TRANS_GOLGI	REACTOME_N_GLYCAN_ANTENNAE_ELONGATION_IN_THE_MEDIAL_TRANS_GOLGI	REACTOME_N_GLYCAN_ANTENNAE_ELONGATION_IN_THE_MEDIAL_TRANS_GOLGI	21582	4668-10-01	0.00662216	0.136858	0.123149	Man2a1/St3gal4	2	REACTOME	down	NP
REACTOME_SARS_COV_1_INFECTION1	REACTOME_SARS_COV_1_INFECTION	REACTOME_SARS_COV_1_INFECTION	21610	36/4668	0.0101875	0.181304	0.163142	St3gal4/Uvrag/Parp14	3	REACTOME	down	NP
REACTOME_INTRACELLULAR_SIGNALING_BY_SECOND_MESSENGERS1	REACTOME_INTRACELLULAR_SIGNALING_BY_SECOND_MESSENGERS	REACTOME_INTRACELLULAR_SIGNALING_BY_SECOND_MESSENGERS	21732	193/4668	0.0102094	0.181304	0.163142	Phlpp1/Egfr/Gab2/Itpr1/Pik3ap1/Nbea/Pik3cd	7	REACTOME	down	NP
REACTOME_DISEASES_OF_SIGNAL_TRANSDUCTION_BY_GROWTH_FACTOR_RECEPTORS_AND_SECOND_MESSENGERS1	REACTOME_DISEASES_OF_SIGNAL_TRANSDUCTION_BY_GROWTH_FACTOR_RECEPTORS_AND_SECOND_MESSENGERS	REACTOME_DISEASES_OF_SIGNAL_TRANSDUCTION_BY_GROWTH_FACTOR_RECEPTORS_AND_SECOND_MESSENGERS	21794	294/4668	0.010654	0.181304	0.163142	Etv6/Arrb2/Egfr/Stat1/Gab2/Rnf213/Maml3/Pik3ap1/Pik3cd	9	REACTOME	down	NP
REACTOME_SIGNALING_BY_RECEPTOR_TYROSINE_KINASES1	REACTOME_SIGNALING_BY_RECEPTOR_TYROSINE_KINASES	REACTOME_SIGNALING_BY_RECEPTOR_TYROSINE_KINASES	21794	296/4668	0.0111122	0.181304	0.163142	Tcirg1/Ptprj/Egfr/Epn1/Stat1/Gab2/Fes/Itpr1/Axl	9	REACTOME	down	NP
REACTOME_TRANSLATION_OF_SARS_COV_2_STRUCTURAL_PROTEINS1	REACTOME_TRANSLATION_OF_SARS_COV_2_STRUCTURAL_PROTEINS	REACTOME_TRANSLATION_OF_SARS_COV_2_STRUCTURAL_PROTEINS	21610	38/4668	0.0118242	0.183275	0.164916	Man2a1/St3gal4/Parp14	3	REACTOME	down	NP
REACTOME_INTERLEUKIN_RECEPTOR_SHC_SIGNALING1	REACTOME_INTERLEUKIN_RECEPTOR_SHC_SIGNALING	REACTOME_INTERLEUKIN_RECEPTOR_SHC_SIGNALING	21582	14/4668	0.0129641	0.189822	0.170808	Gab2/Pik3cd	2	REACTOME	down	NP
REACTOME_SARS_COV_INFECTIONS1	REACTOME_SARS_COV_INFECTIONS	REACTOME_SARS_COV_INFECTIONS	21671	113/4668	0.0134713	0.189822	0.170808	Man2a1/Stat2/St3gal4/Uvrag/Parp14	5	REACTOME	down	NP
REACTOME_INITIAL_TRIGGERING_OF_COMPLEMENT1	REACTOME_INITIAL_TRIGGERING_OF_COMPLEMENT	REACTOME_INITIAL_TRIGGERING_OF_COMPLEMENT	21582	15/4668	0.014838	0.191658	0.172459	C4b/Cfp	2	REACTOME	down	NP
REACTOME_PURINERGIC_SIGNALING_IN_LEISHMANIASIS_INFECTION1	REACTOME_PURINERGIC_SIGNALING_IN_LEISHMANIASIS_INFECTION	REACTOME_PURINERGIC_SIGNALING_IN_LEISHMANIASIS_INFECTION	21582	15/4668	0.014838	0.191658	0.172459	App/Gsdmd	2	REACTOME	down	NP
REACTOME_NOTCH3_INTRACELLULAR_DOMAIN_REGULATES_TRANSCRIPTION	REACTOME_NOTCH3_INTRACELLULAR_DOMAIN_REGULATES_TRANSCRIPTION	REACTOME_NOTCH3_INTRACELLULAR_DOMAIN_REGULATES_TRANSCRIPTION	21582	16/4668	0.0168212	0.195411	0.175836	Stat1/Maml3	2	REACTOME	down	NP
REACTOME_ROLE_OF_PHOSPHOLIPIDS_IN_PHAGOCYTOSIS	REACTOME_ROLE_OF_PHOSPHOLIPIDS_IN_PHAGOCYTOSIS	REACTOME_ROLE_OF_PHOSPHOLIPIDS_IN_PHAGOCYTOSIS	21582	16/4668	0.0168212	0.195411	0.175836	Pld4/Itpr1	2	REACTOME	down	NP
REACTOME_SIGNALING_BY_GPCR1	REACTOME_SIGNALING_BY_GPCR	REACTOME_SIGNALING_BY_GPCR	21702	167/4668	0.0179961	0.195411	0.175836	Arrb2/Egfr/App/Itpr1/Pde7b/Nbea	6	REACTOME	down	NP
REACTOME_SIGNALING_BY_CYTOSOLIC_FGFR1_FUSION_MUTANTS	REACTOME_SIGNALING_BY_CYTOSOLIC_FGFR1_FUSION_MUTANTS	REACTOME_SIGNALING_BY_CYTOSOLIC_FGFR1_FUSION_MUTANTS	21582	17/4668	0.0189107	0.195411	0.175836	Stat1/Gab2	2	REACTOME	down	NP
REACTOME_SIGNALING_BY_FLT3_FUSION_PROTEINS	REACTOME_SIGNALING_BY_FLT3_FUSION_PROTEINS	REACTOME_SIGNALING_BY_FLT3_FUSION_PROTEINS	21582	17/4668	0.0189107	0.195411	0.175836	Etv6/Gab2	2	REACTOME	down	NP
REACTOME_SIGNALING_BY_PDGFR_IN_DISEASE	REACTOME_SIGNALING_BY_PDGFR_IN_DISEASE	REACTOME_SIGNALING_BY_PDGFR_IN_DISEASE	21582	17/4668	0.0189107	0.195411	0.175836	Etv6/Stat1	2	REACTOME	down	NP
REACTOME_SIGNALING_BY_NOTCH11	REACTOME_SIGNALING_BY_NOTCH1	REACTOME_SIGNALING_BY_NOTCH1	21610	49/4668	0.0234221	0.228409	0.205529	Arrb2/Maml3/Nbea	3	REACTOME	down	NP
REACTOME_EGFR_DOWNREGULATION1	REACTOME_EGFR_DOWNREGULATION	REACTOME_EGFR_DOWNREGULATION	21582	20/4668	0.0257881	0.228409	0.205529	Egfr/Epn1	2	REACTOME	down	NP
REACTOME_FGFR1_MUTANT_RECEPTOR_ACTIVATION	REACTOME_FGFR1_MUTANT_RECEPTOR_ACTIVATION	REACTOME_FGFR1_MUTANT_RECEPTOR_ACTIVATION	21582	20/4668	0.0257881	0.228409	0.205529	Stat1/Gab2	2	REACTOME	down	NP
REACTOME_MATURATION_OF_SARS_COV_2_SPIKE_PROTEIN	REACTOME_MATURATION_OF_SARS_COV_2_SPIKE_PROTEIN	REACTOME_MATURATION_OF_SARS_COV_2_SPIKE_PROTEIN	21582	20/4668	0.0257881	0.228409	0.205529	Man2a1/St3gal4	2	REACTOME	down	NP
REACTOME_RET_SIGNALING	REACTOME_RET_SIGNALING	REACTOME_RET_SIGNALING	21582	20/4668	0.0257881	0.228409	0.205529	Gab2/Pik3cd	2	REACTOME	down	NP
REACTOME_ANTIVIRAL_MECHANISM_BY_IFN_STIMULATED_GENES1	REACTOME_ANTIVIRAL_MECHANISM_BY_IFN_STIMULATED_GENES	REACTOME_ANTIVIRAL_MECHANISM_BY_IFN_STIMULATED_GENES	21610	53/4668	0.0287464	0.247539	0.222743	Stat1/Eif4a1/Uba7	3	REACTOME	down	NP
REACTOME_GLYCOSAMINOGLYCAN_METABOLISM	REACTOME_GLYCOSAMINOGLYCAN_METABOLISM	REACTOME_GLYCOSAMINOGLYCAN_METABOLISM	21610	54/4668	0.0301699	0.252775	0.227455	St3gal4/Cd44/Ext1	3	REACTOME	down	NP
REACTOME_CLATHRIN_MEDIATED_ENDOCYTOSIS1	REACTOME_CLATHRIN_MEDIATED_ENDOCYTOSIS	REACTOME_CLATHRIN_MEDIATED_ENDOCYTOSIS	21641	97/4668	0.0333973	0.266446	0.239757	Arrb2/Egfr/Epn1/Arfgap1	4	REACTOME	down	NP
REACTOME_TRANSLATION_OF_SARS_COV_1_STRUCTURAL_PROTEINS1	REACTOME_TRANSLATION_OF_SARS_COV_1_STRUCTURAL_PROTEINS	REACTOME_TRANSLATION_OF_SARS_COV_1_STRUCTURAL_PROTEINS	21582	23/4668	0.0335207	0.266446	0.239757	St3gal4/Parp14	2	REACTOME	down	NP
REACTOME_DAG_AND_IP3_SIGNALING	REACTOME_DAG_AND_IP3_SIGNALING	REACTOME_DAG_AND_IP3_SIGNALING	21582	24/4668	0.0362758	0.26775	0.240929	Itpr1/Nbea	2	REACTOME	down	NP
REACTOME_FLT3_SIGNALING_IN_DISEASE1	REACTOME_FLT3_SIGNALING_IN_DISEASE	REACTOME_FLT3_SIGNALING_IN_DISEASE	21582	24/4668	0.0362758	0.26775	0.240929	Etv6/Gab2	2	REACTOME	down	NP
REACTOME_SIGNALING_BY_CSF3_G_CSF1	REACTOME_SIGNALING_BY_CSF3_G_CSF	REACTOME_SIGNALING_BY_CSF3_G_CSF	21582	24/4668	0.0362758	0.26775	0.240929	Stat1/Gab2	2	REACTOME	down	NP
REACTOME_G_ALPHA_Q_SIGNALLING_EVENTS1	REACTOME_G_ALPHA_Q_SIGNALLING_EVENTS	REACTOME_G_ALPHA_Q_SIGNALLING_EVENTS	21610	59/4668	0.0378371	0.272779	0.245455	Egfr/App/Itpr1	3	REACTOME	down	NP
REACTOME_SIGNALING_BY_FGFR1_IN_DISEASE	REACTOME_SIGNALING_BY_FGFR1_IN_DISEASE	REACTOME_SIGNALING_BY_FGFR1_IN_DISEASE	21582	26/4668	0.042037	0.296169	0.266502	Stat1/Gab2	2	REACTOME	down	NP
REACTOME_CARGO_RECOGNITION_FOR_CLATHRIN_MEDIATED_ENDOCYTOSIS1	REACTOME_CARGO_RECOGNITION_FOR_CLATHRIN_MEDIATED_ENDOCYTOSIS	REACTOME_CARGO_RECOGNITION_FOR_CLATHRIN_MEDIATED_ENDOCYTOSIS	21610	65/4668	0.0482282	0.332239	0.298958	Arrb2/Egfr/Epn1	3	REACTOME	down	NP
REACTOME_G_ALPHA_I_SIGNALLING_EVENTS	REACTOME_G_ALPHA_I_SIGNALLING_EVENTS	REACTOME_G_ALPHA_I_SIGNALLING_EVENTS	21610	66/4668	0.0500836	0.33752	0.303711	App/Itpr1/Nbea	3	REACTOME	down	NP
REACTOME_FLT3_SIGNALING1	REACTOME_FLT3_SIGNALING	REACTOME_FLT3_SIGNALING	21582	30/4668	0.0544951	0.344765	0.31023	Ptprj/Gab2	2	REACTOME	down	NP
REACTOME_INTRINSIC_PATHWAY_FOR_APOPTOSIS	REACTOME_INTRINSIC_PATHWAY_FOR_APOPTOSIS	REACTOME_INTRINSIC_PATHWAY_FOR_APOPTOSIS	21582	30/4668	0.0544951	0.344765	0.31023	Casp7/Gsdmd	2	REACTOME	down	NP
REACTOME_O_LINKED_GLYCOSYLATION	REACTOME_O_LINKED_GLYCOSYLATION	REACTOME_O_LINKED_GLYCOSYLATION	21582	30/4668	0.0544951	0.344765	0.31023	St3gal4/Cfp	2	REACTOME	down	NP
REACTOME_G_PROTEIN_MEDIATED_EVENTS	REACTOME_G_PROTEIN_MEDIATED_EVENTS	REACTOME_G_PROTEIN_MEDIATED_EVENTS	21582	31/4668	0.0577909	0.351278	0.31609	Itpr1/Nbea	2	REACTOME	down	NP
REACTOME_INTERFERON_ALPHA_BETA_SIGNALING1	REACTOME_INTERFERON_ALPHA_BETA_SIGNALING	REACTOME_INTERFERON_ALPHA_BETA_SIGNALING	21582	31/4668	0.0577909	0.351278	0.31609	Stat1/Stat2	2	REACTOME	down	NP
REACTOME_INTERLEUKIN_3_INTERLEUKIN_5_AND_GM_CSF_SIGNALING1	REACTOME_INTERLEUKIN_3_INTERLEUKIN_5_AND_GM_CSF_SIGNALING	REACTOME_INTERLEUKIN_3_INTERLEUKIN_5_AND_GM_CSF_SIGNALING	21582	32/4668	0.0611547	0.361945	0.325689	Gab2/Pik3cd	2	REACTOME	down	NP
REACTOME_SIGNALING_BY_INTERLEUKINS1	REACTOME_SIGNALING_BY_INTERLEUKINS	REACTOME_SIGNALING_BY_INTERLEUKINS	21702	224/4668	0.0618809	0.361945	0.325689	Stat1/Gab2/Stat2/App/Gsdmd/Pik3cd	6	REACTOME	down	NP
REACTOME_SIGNALING_BY_FGFR_IN_DISEASE	REACTOME_SIGNALING_BY_FGFR_IN_DISEASE	REACTOME_SIGNALING_BY_FGFR_IN_DISEASE	21582	33/4668	0.0645843	0.370762	0.333623	Stat1/Gab2	2	REACTOME	down	NP
REACTOME_G_ALPHA_S_SIGNALLING_EVENTS	REACTOME_G_ALPHA_S_SIGNALLING_EVENTS	REACTOME_G_ALPHA_S_SIGNALLING_EVENTS	21582	35/4668	0.0716325	0.402574	0.362248	Arrb2/Pde7b	2	REACTOME	down	NP
REACTOME_SIGNALING_BY_THE_B_CELL_RECEPTOR_BCR1	REACTOME_SIGNALING_BY_THE_B_CELL_RECEPTOR_BCR	REACTOME_SIGNALING_BY_THE_B_CELL_RECEPTOR_BCR	21610	77/4668	0.072723	0.402574	0.362248	Itpr1/Pik3ap1/Pik3cd	3	REACTOME	down	NP
REACTOME_NOTCH1_INTRACELLULAR_DOMAIN_REGULATES_TRANSCRIPTION1	REACTOME_NOTCH1_INTRACELLULAR_DOMAIN_REGULATES_TRANSCRIPTION	REACTOME_NOTCH1_INTRACELLULAR_DOMAIN_REGULATES_TRANSCRIPTION	21582	36/4668	0.0752469	0.407747	0.366903	Maml3/Nbea	2	REACTOME	down	NP
REACTOME_INTRA_GOLGI_TRAFFIC	REACTOME_INTRA_GOLGI_TRAFFIC	REACTOME_INTRA_GOLGI_TRAFFIC	21582	37/4668	0.0789188	0.407747	0.366903	Cyth4/Man2a1	2	REACTOME	down	NP
REACTOME_PRE_NOTCH_EXPRESSION_AND_PROCESSING	REACTOME_PRE_NOTCH_EXPRESSION_AND_PROCESSING	REACTOME_PRE_NOTCH_EXPRESSION_AND_PROCESSING	21582	37/4668	0.0789188	0.407747	0.366903	St3gal4/Maml3	2	REACTOME	down	NP
REACTOME_SIGNALING_BY_EGFR1	REACTOME_SIGNALING_BY_EGFR	REACTOME_SIGNALING_BY_EGFR	21582	37/4668	0.0789188	0.407747	0.366903	Egfr/Epn1	2	REACTOME	down	NP
REACTOME_COMPLEMENT_CASCADE1	REACTOME_COMPLEMENT_CASCADE	REACTOME_COMPLEMENT_CASCADE	21582	38/4668	0.0826463	0.420006	0.377934	C4b/Cfp	2	REACTOME	down	NP
REACTOME_NEUTROPHIL_DEGRANULATION1	REACTOME_NEUTROPHIL_DEGRANULATION	REACTOME_NEUTROPHIL_DEGRANULATION	21702	261/4668	0.109699	0.438214	0.394319	Tcirg1/Ptprj/Cd44/Cfp/Trpm2/Gsdmd	6	REACTOME	down	NP
REACTOME_SIGNALING_BY_INSULIN_RECEPTOR	REACTOME_SIGNALING_BY_INSULIN_RECEPTOR	REACTOME_SIGNALING_BY_INSULIN_RECEPTOR	21582	45/4668	0.110136	0.438214	0.394319	Tcirg1/Gab2	2	REACTOME	down	NP
REACTOME_TOLL_LIKE_RECEPTOR_CASCADES1	REACTOME_TOLL_LIKE_RECEPTOR_CASCADES	REACTOME_TOLL_LIKE_RECEPTOR_CASCADES	21610	95/4668	0.117734	0.438214	0.394319	App/Gsdmd/Ikbke	3	REACTOME	down	NP
REACTOME_DEFECTIVE_EXT2_CAUSES_EXOSTOSES_2	REACTOME_DEFECTIVE_EXT2_CAUSES_EXOSTOSES_2	REACTOME_DEFECTIVE_EXT2_CAUSES_EXOSTOSES_2	21551	4668-10-01	0.11955	0.438214	0.394319	Ext1	1	REACTOME	down	NP
REACTOME_GAB1_SIGNALOSOME	REACTOME_GAB1_SIGNALOSOME	REACTOME_GAB1_SIGNALOSOME	21551	4668-10-01	0.11955	0.438214	0.394319	Egfr	1	REACTOME	down	NP
REACTOME_PKA_MEDIATED_PHOSPHORYLATION_OF_CREB	REACTOME_PKA_MEDIATED_PHOSPHORYLATION_OF_CREB	REACTOME_PKA_MEDIATED_PHOSPHORYLATION_OF_CREB	21551	4668-10-01	0.11955	0.438214	0.394319	Nbea	1	REACTOME	down	NP
REACTOME_REGULATION_OF_IFNG_SIGNALING	REACTOME_REGULATION_OF_IFNG_SIGNALING	REACTOME_REGULATION_OF_IFNG_SIGNALING	21551	4668-10-01	0.11955	0.438214	0.394319	Stat1	1	REACTOME	down	NP
REACTOME_SIGNALING_BY_PDGFRA_TRANSMEMBRANE_JUXTAMEMBRANE_AND_KINASE_DOMAIN_MUTANTS	REACTOME_SIGNALING_BY_PDGFRA_TRANSMEMBRANE_JUXTAMEMBRANE_AND_KINASE_DOMAIN_MUTANTS	REACTOME_SIGNALING_BY_PDGFRA_TRANSMEMBRANE_JUXTAMEMBRANE_AND_KINASE_DOMAIN_MUTANTS	21551	4668-10-01	0.11955	0.438214	0.394319	Stat1	1	REACTOME	down	NP
REACTOME_WNT5A_DEPENDENT_INTERNALIZATION_OF_FZD4	REACTOME_WNT5A_DEPENDENT_INTERNALIZATION_OF_FZD4	REACTOME_WNT5A_DEPENDENT_INTERNALIZATION_OF_FZD4	21551	4668-10-01	0.11955	0.438214	0.394319	Arrb2	1	REACTOME	down	NP
REACTOME_OPIOID_SIGNALLING	REACTOME_OPIOID_SIGNALLING	REACTOME_OPIOID_SIGNALLING	21582	48/4668	0.122569	0.438214	0.394319	Itpr1/Nbea	2	REACTOME	down	NP
REACTOME_LEISHMANIA_INFECTION1	REACTOME_LEISHMANIA_INFECTION	REACTOME_LEISHMANIA_INFECTION	21610	99/4668	0.128898	0.438214	0.394319	App/Itpr1/Gsdmd	3	REACTOME	down	NP
REACTOME_ACTIVATION_OF_IRF3_IRF7_MEDIATED_BY_TBK1_IKK_EPSILON1	REACTOME_ACTIVATION_OF_IRF3_IRF7_MEDIATED_BY_TBK1_IKK_EPSILON	REACTOME_ACTIVATION_OF_IRF3_IRF7_MEDIATED_BY_TBK1_IKK_EPSILON	21551	4668-11-01	0.130702	0.438214	0.394319	Ikbke	1	REACTOME	down	NP
REACTOME_GENERATION_OF_SECOND_MESSENGER_MOLECULES	REACTOME_GENERATION_OF_SECOND_MESSENGER_MOLECULES	REACTOME_GENERATION_OF_SECOND_MESSENGER_MOLECULES	21551	4668-11-01	0.130702	0.438214	0.394319	H2-Ab1	1	REACTOME	down	NP
REACTOME_INFLAMMASOMES1	REACTOME_INFLAMMASOMES	REACTOME_INFLAMMASOMES	21551	4668-11-01	0.130702	0.438214	0.394319	App	1	REACTOME	down	NP
REACTOME_INTERLEUKIN_15_SIGNALING	REACTOME_INTERLEUKIN_15_SIGNALING	REACTOME_INTERLEUKIN_15_SIGNALING	21551	4668-11-01	0.130702	0.438214	0.394319	Gab2	1	REACTOME	down	NP
REACTOME_MATURATION_OF_SARS_COV_1_NUCLEOPROTEIN	REACTOME_MATURATION_OF_SARS_COV_1_NUCLEOPROTEIN	REACTOME_MATURATION_OF_SARS_COV_1_NUCLEOPROTEIN	21551	4668-11-01	0.130702	0.438214	0.394319	Parp14	1	REACTOME	down	NP
REACTOME_NEGATIVE_REGULATION_OF_FLT31	REACTOME_NEGATIVE_REGULATION_OF_FLT3	REACTOME_NEGATIVE_REGULATION_OF_FLT3	21551	4668-11-01	0.130702	0.438214	0.394319	Ptprj	1	REACTOME	down	NP
REACTOME_O_GLYCOSYLATION_OF_TSR_DOMAIN_CONTAINING_PROTEINS	REACTOME_O_GLYCOSYLATION_OF_TSR_DOMAIN_CONTAINING_PROTEINS	REACTOME_O_GLYCOSYLATION_OF_TSR_DOMAIN_CONTAINING_PROTEINS	21551	4668-11-01	0.130702	0.438214	0.394319	Cfp	1	REACTOME	down	NP
REACTOME_PRE_NOTCH_PROCESSING_IN_GOLGI	REACTOME_PRE_NOTCH_PROCESSING_IN_GOLGI	REACTOME_PRE_NOTCH_PROCESSING_IN_GOLGI	21551	4668-11-01	0.130702	0.438214	0.394319	St3gal4	1	REACTOME	down	NP
REACTOME_REGULATION_OF_TLR_BY_ENDOGENOUS_LIGAND1	REACTOME_REGULATION_OF_TLR_BY_ENDOGENOUS_LIGAND	REACTOME_REGULATION_OF_TLR_BY_ENDOGENOUS_LIGAND	21551	4668-11-01	0.130702	0.438214	0.394319	Gsdmd	1	REACTOME	down	NP
REACTOME_TRAF3_DEPENDENT_IRF_ACTIVATION_PATHWAY	REACTOME_TRAF3_DEPENDENT_IRF_ACTIVATION_PATHWAY	REACTOME_TRAF3_DEPENDENT_IRF_ACTIVATION_PATHWAY	21551	4668-11-01	0.130702	0.438214	0.394319	Ikbke	1	REACTOME	down	NP
REACTOME_ASSEMBLY_AND_CELL_SURFACE_PRESENTATION_OF_NMDA_RECEPTORS	REACTOME_ASSEMBLY_AND_CELL_SURFACE_PRESENTATION_OF_NMDA_RECEPTORS	REACTOME_ASSEMBLY_AND_CELL_SURFACE_PRESENTATION_OF_NMDA_RECEPTORS	21551	4668-12-01	0.141715	0.438214	0.394319	Nbea	1	REACTOME	down	NP
REACTOME_ESTROGEN_DEPENDENT_NUCLEAR_EVENTS_DOWNSTREAM_OF_ESR_MEMBRANE_SIGNALING	REACTOME_ESTROGEN_DEPENDENT_NUCLEAR_EVENTS_DOWNSTREAM_OF_ESR_MEMBRANE_SIGNALING	REACTOME_ESTROGEN_DEPENDENT_NUCLEAR_EVENTS_DOWNSTREAM_OF_ESR_MEMBRANE_SIGNALING	21551	4668-12-01	0.141715	0.438214	0.394319	Egfr	1	REACTOME	down	NP
REACTOME_INSERTION_OF_TAIL_ANCHORED_PROTEINS_INTO_THE_ENDOPLASMIC_RETICULUM_MEMBRANE	REACTOME_INSERTION_OF_TAIL_ANCHORED_PROTEINS_INTO_THE_ENDOPLASMIC_RETICULUM_MEMBRANE	REACTOME_INSERTION_OF_TAIL_ANCHORED_PROTEINS_INTO_THE_ENDOPLASMIC_RETICULUM_MEMBRANE	21551	4668-12-01	0.141715	0.438214	0.394319	App	1	REACTOME	down	NP
REACTOME_NICOTINAMIDE_SALVAGING1	REACTOME_NICOTINAMIDE_SALVAGING	REACTOME_NICOTINAMIDE_SALVAGING	21551	4668-12-01	0.141715	0.438214	0.394319	Parp14	1	REACTOME	down	NP
REACTOME_PLATELET_CALCIUM_HOMEOSTASIS	REACTOME_PLATELET_CALCIUM_HOMEOSTASIS	REACTOME_PLATELET_CALCIUM_HOMEOSTASIS	21551	4668-12-01	0.141715	0.438214	0.394319	Itpr1	1	REACTOME	down	NP
REACTOME_PYROPTOSIS	REACTOME_PYROPTOSIS	REACTOME_PYROPTOSIS	21551	4668-12-01	0.141715	0.438214	0.394319	Gsdmd	1	REACTOME	down	NP
REACTOME_ROLE_OF_LAT2_NTAL_LAB_ON_CALCIUM_MOBILIZATION	REACTOME_ROLE_OF_LAT2_NTAL_LAB_ON_CALCIUM_MOBILIZATION	REACTOME_ROLE_OF_LAT2_NTAL_LAB_ON_CALCIUM_MOBILIZATION	21551	4668-12-01	0.141715	0.438214	0.394319	Gab2	1	REACTOME	down	NP
REACTOME_RUNX3_REGULATES_NOTCH_SIGNALING	REACTOME_RUNX3_REGULATES_NOTCH_SIGNALING	REACTOME_RUNX3_REGULATES_NOTCH_SIGNALING	21551	4668-12-01	0.141715	0.438214	0.394319	Maml3	1	REACTOME	down	NP
REACTOME_SYNTHESIS_OF_BILE_ACIDS_AND_BILE_SALTS_VIA_27_HYDROXYCHOLESTEROL1	REACTOME_SYNTHESIS_OF_BILE_ACIDS_AND_BILE_SALTS_VIA_27_HYDROXYCHOLESTEROL	REACTOME_SYNTHESIS_OF_BILE_ACIDS_AND_BILE_SALTS_VIA_27_HYDROXYCHOLESTEROL	21551	4668-12-01	0.141715	0.438214	0.394319	Cyp7b1	1	REACTOME	down	NP
REACTOME_TERMINATION_OF_TRANSLESION_DNA_SYNTHESIS1	REACTOME_TERMINATION_OF_TRANSLESION_DNA_SYNTHESIS	REACTOME_TERMINATION_OF_TRANSLESION_DNA_SYNTHESIS	21551	4668-12-01	0.141715	0.438214	0.394319	Uba7	1	REACTOME	down	NP
REACTOME_DISEASES_OF_METABOLISM1	REACTOME_DISEASES_OF_METABOLISM	REACTOME_DISEASES_OF_METABOLISM	21610	105/4668	0.146325	0.438214	0.394319	Cyp7b1/Ext1/Cfp	3	REACTOME	down	NP
REACTOME_PHASE_I_FUNCTIONALIZATION_OF_COMPOUNDS1	REACTOME_PHASE_I_FUNCTIONALIZATION_OF_COMPOUNDS	REACTOME_PHASE_I_FUNCTIONALIZATION_OF_COMPOUNDS	21582	54/4668	0.148375	0.438214	0.394319	Cyp7b1/Ptgs1	2	REACTOME	down	NP
REACTOME_CONSTITUTIVE_SIGNALING_BY_EGFRVIII	REACTOME_CONSTITUTIVE_SIGNALING_BY_EGFRVIII	REACTOME_CONSTITUTIVE_SIGNALING_BY_EGFRVIII	21551	13/4668	0.152591	0.438214	0.394319	Egfr	1	REACTOME	down	NP
REACTOME_INTERLEUKIN_6_FAMILY_SIGNALING	REACTOME_INTERLEUKIN_6_FAMILY_SIGNALING	REACTOME_INTERLEUKIN_6_FAMILY_SIGNALING	21551	13/4668	0.152591	0.438214	0.394319	Stat1	1	REACTOME	down	NP
REACTOME_KERATAN_SULFATE_KERATIN_METABOLISM	REACTOME_KERATAN_SULFATE_KERATIN_METABOLISM	REACTOME_KERATAN_SULFATE_KERATIN_METABOLISM	21551	13/4668	0.152591	0.438214	0.394319	St3gal4	1	REACTOME	down	NP
REACTOME_REGULATION_OF_GENE_EXPRESSION_IN_LATE_STAGE_BRANCHING_MORPHOGENESIS_PANCREATIC_BUD_PRECURSOR_CELLS	REACTOME_REGULATION_OF_GENE_EXPRESSION_IN_LATE_STAGE_BRANCHING_MORPHOGENESIS_PANCREATIC_BUD_PRECURSOR_CELLS	REACTOME_REGULATION_OF_GENE_EXPRESSION_IN_LATE_STAGE_BRANCHING_MORPHOGENESIS_PANCREATIC_BUD_PRECURSOR_CELLS	21551	13/4668	0.152591	0.438214	0.394319	Maml3	1	REACTOME	down	NP
REACTOME_SHC1_EVENTS_IN_ERBB2_SIGNALING	REACTOME_SHC1_EVENTS_IN_ERBB2_SIGNALING	REACTOME_SHC1_EVENTS_IN_ERBB2_SIGNALING	21551	13/4668	0.152591	0.438214	0.394319	Egfr	1	REACTOME	down	NP
REACTOME_SIGNALING_BY_ERBB2_ECD_MUTANTS	REACTOME_SIGNALING_BY_ERBB2_ECD_MUTANTS	REACTOME_SIGNALING_BY_ERBB2_ECD_MUTANTS	21551	13/4668	0.152591	0.438214	0.394319	Egfr	1	REACTOME	down	NP
REACTOME_SIGNALING_BY_FLT3_ITD_AND_TKD_MUTANTS	REACTOME_SIGNALING_BY_FLT3_ITD_AND_TKD_MUTANTS	REACTOME_SIGNALING_BY_FLT3_ITD_AND_TKD_MUTANTS	21551	13/4668	0.152591	0.438214	0.394319	Gab2	1	REACTOME	down	NP
REACTOME_TRAF6_MEDIATED_IRF7_ACTIVATION	REACTOME_TRAF6_MEDIATED_IRF7_ACTIVATION	REACTOME_TRAF6_MEDIATED_IRF7_ACTIVATION	21551	13/4668	0.152591	0.438214	0.394319	Ikbke	1	REACTOME	down	NP
REACTOME_TRANSPORT_OF_VITAMINS_NUCLEOSIDES_AND_RELATED_MOLECULES	REACTOME_TRANSPORT_OF_VITAMINS_NUCLEOSIDES_AND_RELATED_MOLECULES	REACTOME_TRANSPORT_OF_VITAMINS_NUCLEOSIDES_AND_RELATED_MOLECULES	21551	13/4668	0.152591	0.438214	0.394319	Slco3a1	1	REACTOME	down	NP
REACTOME_DISEASES_OF_GLYCOSYLATION	REACTOME_DISEASES_OF_GLYCOSYLATION	REACTOME_DISEASES_OF_GLYCOSYLATION	21582	56/4668	0.157212	0.438214	0.394319	Ext1/Cfp	2	REACTOME	down	NP
REACTOME_REGULATION_OF_INSULIN_LIKE_GROWTH_FACTOR_IGF_TRANSPORT_AND_UPTAKE_BY_INSULIN_LIKE_GROWTH_FACTOR_BINDING_PROTEINS_IGFBPS1	REACTOME_REGULATION_OF_INSULIN_LIKE_GROWTH_FACTOR_IGF_TRANSPORT_AND_UPTAKE_BY_INSULIN_LIKE_GROWTH_FACTOR_BINDING_PROTEINS_IGFBPS	REACTOME_REGULATION_OF_INSULIN_LIKE_GROWTH_FACTOR_IGF_TRANSPORT_AND_UPTAKE_BY_INSULIN_LIKE_GROWTH_FACTOR_BINDING_PROTEINS_IGFBPS	21582	57/4668	0.161668	0.438214	0.394319	C4b/App	2	REACTOME	down	NP
REACTOME_DEFECTIVE_INTRINSIC_PATHWAY_FOR_APOPTOSIS	REACTOME_DEFECTIVE_INTRINSIC_PATHWAY_FOR_APOPTOSIS	REACTOME_DEFECTIVE_INTRINSIC_PATHWAY_FOR_APOPTOSIS	21551	14/4668	0.163331	0.438214	0.394319	App	1	REACTOME	down	NP
REACTOME_MATURATION_OF_SARS_COV_2_NUCLEOPROTEIN	REACTOME_MATURATION_OF_SARS_COV_2_NUCLEOPROTEIN	REACTOME_MATURATION_OF_SARS_COV_2_NUCLEOPROTEIN	21551	14/4668	0.163331	0.438214	0.394319	Parp14	1	REACTOME	down	NP
REACTOME_NOTCH3_ACTIVATION_AND_TRANSMISSION_OF_SIGNAL_TO_THE_NUCLEUS1	REACTOME_NOTCH3_ACTIVATION_AND_TRANSMISSION_OF_SIGNAL_TO_THE_NUCLEUS	REACTOME_NOTCH3_ACTIVATION_AND_TRANSMISSION_OF_SIGNAL_TO_THE_NUCLEUS	21551	14/4668	0.163331	0.438214	0.394319	Egfr	1	REACTOME	down	NP
REACTOME_NOTCH4_INTRACELLULAR_DOMAIN_REGULATES_TRANSCRIPTION	REACTOME_NOTCH4_INTRACELLULAR_DOMAIN_REGULATES_TRANSCRIPTION	REACTOME_NOTCH4_INTRACELLULAR_DOMAIN_REGULATES_TRANSCRIPTION	21551	14/4668	0.163331	0.438214	0.394319	Maml3	1	REACTOME	down	NP
REACTOME_ENDOGENOUS_STEROLS1	REACTOME_ENDOGENOUS_STEROLS	REACTOME_ENDOGENOUS_STEROLS	21551	15/4668	0.173938	0.438214	0.394319	Cyp7b1	1	REACTOME	down	NP
REACTOME_GROWTH_HORMONE_RECEPTOR_SIGNALING	REACTOME_GROWTH_HORMONE_RECEPTOR_SIGNALING	REACTOME_GROWTH_HORMONE_RECEPTOR_SIGNALING	21551	15/4668	0.173938	0.438214	0.394319	Stat1	1	REACTOME	down	NP
REACTOME_METABOLIC_DISORDERS_OF_BIOLOGICAL_OXIDATION_ENZYMES1	REACTOME_METABOLIC_DISORDERS_OF_BIOLOGICAL_OXIDATION_ENZYMES	REACTOME_METABOLIC_DISORDERS_OF_BIOLOGICAL_OXIDATION_ENZYMES	21551	15/4668	0.173938	0.438214	0.394319	Cyp7b1	1	REACTOME	down	NP
REACTOME_SIGNAL_TRANSDUCTION_BY_L1	REACTOME_SIGNAL_TRANSDUCTION_BY_L1	REACTOME_SIGNAL_TRANSDUCTION_BY_L1	21551	15/4668	0.173938	0.438214	0.394319	Egfr	1	REACTOME	down	NP
REACTOME_SYNTHESIS_OF_IP3_AND_IP4_IN_THE_CYTOSOL1	REACTOME_SYNTHESIS_OF_IP3_AND_IP4_IN_THE_CYTOSOL	REACTOME_SYNTHESIS_OF_IP3_AND_IP4_IN_THE_CYTOSOL	21551	15/4668	0.173938	0.438214	0.394319	Pld4	1	REACTOME	down	NP
REACTOME_VEGFR2_MEDIATED_CELL_PROLIFERATION	REACTOME_VEGFR2_MEDIATED_CELL_PROLIFERATION	REACTOME_VEGFR2_MEDIATED_CELL_PROLIFERATION	21551	15/4668	0.173938	0.438214	0.394319	Itpr1	1	REACTOME	down	NP
REACTOME_MHC_CLASS_II_ANTIGEN_PRESENTATION1	REACTOME_MHC_CLASS_II_ANTIGEN_PRESENTATION	REACTOME_MHC_CLASS_II_ANTIGEN_PRESENTATION	21582	61/4668	0.179716	0.438214	0.394319	Cd74/H2-Ab1	2	REACTOME	down	NP
REACTOME_CELL_SURFACE_INTERACTIONS_AT_THE_VASCULAR_WALL1	REACTOME_CELL_SURFACE_INTERACTIONS_AT_THE_VASCULAR_WALL	REACTOME_CELL_SURFACE_INTERACTIONS_AT_THE_VASCULAR_WALL	21582	62/4668	0.184278	0.438214	0.394319	Cd44/Cd74	2	REACTOME	down	NP
REACTOME_FCGAMMA_RECEPTOR_FCGR_DEPENDENT_PHAGOCYTOSIS1	REACTOME_FCGAMMA_RECEPTOR_FCGR_DEPENDENT_PHAGOCYTOSIS	REACTOME_FCGAMMA_RECEPTOR_FCGR_DEPENDENT_PHAGOCYTOSIS	21582	62/4668	0.184278	0.438214	0.394319	Pld4/Itpr1	2	REACTOME	down	NP
REACTOME_CONSTITUTIVE_SIGNALING_BY_LIGAND_RESPONSIVE_EGFR_CANCER_VARIANTS1	REACTOME_CONSTITUTIVE_SIGNALING_BY_LIGAND_RESPONSIVE_EGFR_CANCER_VARIANTS	REACTOME_CONSTITUTIVE_SIGNALING_BY_LIGAND_RESPONSIVE_EGFR_CANCER_VARIANTS	21551	16/4668	0.184413	0.438214	0.394319	Egfr	1	REACTOME	down	NP
REACTOME_DISEASES_ASSOCIATED_WITH_O_GLYCOSYLATION_OF_PROTEINS	REACTOME_DISEASES_ASSOCIATED_WITH_O_GLYCOSYLATION_OF_PROTEINS	REACTOME_DISEASES_ASSOCIATED_WITH_O_GLYCOSYLATION_OF_PROTEINS	21551	16/4668	0.184413	0.438214	0.394319	Cfp	1	REACTOME	down	NP
REACTOME_EFFECTS_OF_PIP2_HYDROLYSIS	REACTOME_EFFECTS_OF_PIP2_HYDROLYSIS	REACTOME_EFFECTS_OF_PIP2_HYDROLYSIS	21551	16/4668	0.184413	0.438214	0.394319	Itpr1	1	REACTOME	down	NP
REACTOME_INSULIN_RECEPTOR_RECYCLING	REACTOME_INSULIN_RECEPTOR_RECYCLING	REACTOME_INSULIN_RECEPTOR_RECYCLING	21551	16/4668	0.184413	0.438214	0.394319	Tcirg1	1	REACTOME	down	NP
REACTOME_O_LINKED_GLYCOSYLATION_OF_MUCINS	REACTOME_O_LINKED_GLYCOSYLATION_OF_MUCINS	REACTOME_O_LINKED_GLYCOSYLATION_OF_MUCINS	21551	16/4668	0.184413	0.438214	0.394319	St3gal4	1	REACTOME	down	NP
REACTOME_RESPONSE_OF_MTB_TO_PHAGOCYTOSIS1	REACTOME_RESPONSE_OF_MTB_TO_PHAGOCYTOSIS	REACTOME_RESPONSE_OF_MTB_TO_PHAGOCYTOSIS	21551	16/4668	0.184413	0.438214	0.394319	Rnf213	1	REACTOME	down	NP
REACTOME_SIALIC_ACID_METABOLISM	REACTOME_SIALIC_ACID_METABOLISM	REACTOME_SIALIC_ACID_METABOLISM	21551	16/4668	0.184413	0.438214	0.394319	St3gal4	1	REACTOME	down	NP
REACTOME_SIGNALING_BY_KIT_IN_DISEASE	REACTOME_SIGNALING_BY_KIT_IN_DISEASE	REACTOME_SIGNALING_BY_KIT_IN_DISEASE	21551	16/4668	0.184413	0.438214	0.394319	Stat1	1	REACTOME	down	NP
REACTOME_THROMBIN_SIGNALLING_THROUGH_PROTEINASE_ACTIVATED_RECEPTORS_PARS1	REACTOME_THROMBIN_SIGNALLING_THROUGH_PROTEINASE_ACTIVATED_RECEPTORS_PARS	REACTOME_THROMBIN_SIGNALLING_THROUGH_PROTEINASE_ACTIVATED_RECEPTORS_PARS	21551	16/4668	0.184413	0.438214	0.394319	Arrb2	1	REACTOME	down	NP
REACTOME_TRAF6_MEDIATED_NF_KB_ACTIVATION	REACTOME_TRAF6_MEDIATED_NF_KB_ACTIVATION	REACTOME_TRAF6_MEDIATED_NF_KB_ACTIVATION	21551	16/4668	0.184413	0.438214	0.394319	App	1	REACTOME	down	NP
REACTOME_ACTIVATED_NOTCH1_TRANSMITS_SIGNAL_TO_THE_NUCLEUS1	REACTOME_ACTIVATED_NOTCH1_TRANSMITS_SIGNAL_TO_THE_NUCLEUS	REACTOME_ACTIVATED_NOTCH1_TRANSMITS_SIGNAL_TO_THE_NUCLEUS	21551	17/4668	0.194756	0.438214	0.394319	Arrb2	1	REACTOME	down	NP
REACTOME_DOWNREGULATION_OF_ERBB2_SIGNALING1	REACTOME_DOWNREGULATION_OF_ERBB2_SIGNALING	REACTOME_DOWNREGULATION_OF_ERBB2_SIGNALING	21551	17/4668	0.194756	0.438214	0.394319	Egfr	1	REACTOME	down	NP
REACTOME_NUCLEOTIDE_CATABOLISM	REACTOME_NUCLEOTIDE_CATABOLISM	REACTOME_NUCLEOTIDE_CATABOLISM	21551	17/4668	0.194756	0.438214	0.394319	Dpyd	1	REACTOME	down	NP
REACTOME_RORA_ACTIVATES_GENE_EXPRESSION	REACTOME_RORA_ACTIVATES_GENE_EXPRESSION	REACTOME_RORA_ACTIVATES_GENE_EXPRESSION	21551	17/4668	0.194756	0.438214	0.394319	Helz2	1	REACTOME	down	NP
REACTOME_ROS_AND_RNS_PRODUCTION_IN_PHAGOCYTES	REACTOME_ROS_AND_RNS_PRODUCTION_IN_PHAGOCYTES	REACTOME_ROS_AND_RNS_PRODUCTION_IN_PHAGOCYTES	21551	17/4668	0.194756	0.438214	0.394319	Tcirg1	1	REACTOME	down	NP
REACTOME_SIGNALING_BY_EGFR_IN_CANCER1	REACTOME_SIGNALING_BY_EGFR_IN_CANCER	REACTOME_SIGNALING_BY_EGFR_IN_CANCER	21551	17/4668	0.194756	0.438214	0.394319	Egfr	1	REACTOME	down	NP
REACTOME_SIGNALING_BY_ERBB2_IN_CANCER	REACTOME_SIGNALING_BY_ERBB2_IN_CANCER	REACTOME_SIGNALING_BY_ERBB2_IN_CANCER	21551	17/4668	0.194756	0.438214	0.394319	Egfr	1	REACTOME	down	NP
REACTOME_TRANSLESION_SYNTHESIS_BY_Y_FAMILY_DNA_POLYMERASES_BYPASSES_LESIONS_ON_DNA_TEMPLATE1	REACTOME_TRANSLESION_SYNTHESIS_BY_Y_FAMILY_DNA_POLYMERASES_BYPASSES_LESIONS_ON_DNA_TEMPLATE	REACTOME_TRANSLESION_SYNTHESIS_BY_Y_FAMILY_DNA_POLYMERASES_BYPASSES_LESIONS_ON_DNA_TEMPLATE	21551	17/4668	0.194756	0.438214	0.394319	Uba7	1	REACTOME	down	NP
REACTOME_TRANSPORT_TO_THE_GOLGI_AND_SUBSEQUENT_MODIFICATION1	REACTOME_TRANSPORT_TO_THE_GOLGI_AND_SUBSEQUENT_MODIFICATION	REACTOME_TRANSPORT_TO_THE_GOLGI_AND_SUBSEQUENT_MODIFICATION	21610	123/4668	0.202659	0.438214	0.394319	Man2a1/St3gal4/Arfgap1	3	REACTOME	down	NP
REACTOME_MYD88_INDEPENDENT_TLR4_CASCADE1	REACTOME_MYD88_INDEPENDENT_TLR4_CASCADE	REACTOME_MYD88_INDEPENDENT_TLR4_CASCADE	21582	66/4668	0.202687	0.438214	0.394319	App/Ikbke	2	REACTOME	down	NP
REACTOME_HS_GAG_BIOSYNTHESIS	REACTOME_HS_GAG_BIOSYNTHESIS	REACTOME_HS_GAG_BIOSYNTHESIS	21551	18/4668	0.204971	0.438214	0.394319	Ext1	1	REACTOME	down	NP
REACTOME_INFECTION_WITH_MYCOBACTERIUM_TUBERCULOSIS1	REACTOME_INFECTION_WITH_MYCOBACTERIUM_TUBERCULOSIS	REACTOME_INFECTION_WITH_MYCOBACTERIUM_TUBERCULOSIS	21551	18/4668	0.204971	0.438214	0.394319	Rnf213	1	REACTOME	down	NP
REACTOME_NEGATIVE_REGULATION_OF_MET_ACTIVITY1	REACTOME_NEGATIVE_REGULATION_OF_MET_ACTIVITY	REACTOME_NEGATIVE_REGULATION_OF_MET_ACTIVITY	21551	18/4668	0.204971	0.438214	0.394319	Ptprj	1	REACTOME	down	NP
REACTOME_PEPTIDE_LIGAND_BINDING_RECEPTORS1	REACTOME_PEPTIDE_LIGAND_BINDING_RECEPTORS	REACTOME_PEPTIDE_LIGAND_BINDING_RECEPTORS	21551	18/4668	0.204971	0.438214	0.394319	App	1	REACTOME	down	NP
REACTOME_REGULATION_OF_SIGNALING_BY_CBL1	REACTOME_REGULATION_OF_SIGNALING_BY_CBL	REACTOME_REGULATION_OF_SIGNALING_BY_CBL	21551	18/4668	0.204971	0.438214	0.394319	Pik3cd	1	REACTOME	down	NP
REACTOME_TRANSCRIPTIONAL_REGULATION_BY_THE_AP_2_TFAP2_FAMILY_OF_TRANSCRIPTION_FACTORS1	REACTOME_TRANSCRIPTIONAL_REGULATION_BY_THE_AP_2_TFAP2_FAMILY_OF_TRANSCRIPTION_FACTORS	REACTOME_TRANSCRIPTIONAL_REGULATION_BY_THE_AP_2_TFAP2_FAMILY_OF_TRANSCRIPTION_FACTORS	21551	18/4668	0.204971	0.438214	0.394319	Egfr	1	REACTOME	down	NP
REACTOME_TRANSFERRIN_ENDOCYTOSIS_AND_RECYCLING1	REACTOME_TRANSFERRIN_ENDOCYTOSIS_AND_RECYCLING	REACTOME_TRANSFERRIN_ENDOCYTOSIS_AND_RECYCLING	21551	18/4668	0.204971	0.438214	0.394319	Tcirg1	1	REACTOME	down	NP
REACTOME_GLUCAGON_LIKE_PEPTIDE_1_GLP1_REGULATES_INSULIN_SECRETION	REACTOME_GLUCAGON_LIKE_PEPTIDE_1_GLP1_REGULATES_INSULIN_SECRETION	REACTOME_GLUCAGON_LIKE_PEPTIDE_1_GLP1_REGULATES_INSULIN_SECRETION	21551	19/4668	0.215059	0.450461	0.405338	Itpr1	1	REACTOME	down	NP
REACTOME_INACTIVATION_OF_CSF3_G_CSF_SIGNALING1	REACTOME_INACTIVATION_OF_CSF3_G_CSF_SIGNALING	REACTOME_INACTIVATION_OF_CSF3_G_CSF_SIGNALING	21551	19/4668	0.215059	0.450461	0.405338	Stat1	1	REACTOME	down	NP
REACTOME_SIGNALING_BY_ERYTHROPOIETIN	REACTOME_SIGNALING_BY_ERYTHROPOIETIN	REACTOME_SIGNALING_BY_ERYTHROPOIETIN	21551	19/4668	0.215059	0.450461	0.405338	Pik3cd	1	REACTOME	down	NP
REACTOME_ION_CHANNEL_TRANSPORT1	REACTOME_ION_CHANNEL_TRANSPORT	REACTOME_ION_CHANNEL_TRANSPORT	21582	69/4668	0.216633	0.450714	0.405566	Tcirg1/Trpm2	2	REACTOME	down	NP
REACTOME_METABOLISM_OF_WATER_SOLUBLE_VITAMINS_AND_COFACTORS1	REACTOME_METABOLISM_OF_WATER_SOLUBLE_VITAMINS_AND_COFACTORS	REACTOME_METABOLISM_OF_WATER_SOLUBLE_VITAMINS_AND_COFACTORS	21582	70/4668	0.221303	0.451681	0.406436	Parp14/Gphn	2	REACTOME	down	NP
REACTOME_DISEASES_ASSOCIATED_WITH_GLYCOSAMINOGLYCAN_METABOLISM	REACTOME_DISEASES_ASSOCIATED_WITH_GLYCOSAMINOGLYCAN_METABOLISM	REACTOME_DISEASES_ASSOCIATED_WITH_GLYCOSAMINOGLYCAN_METABOLISM	21551	20/4668	0.22502	0.451681	0.406436	Ext1	1	REACTOME	down	NP
REACTOME_FCGR3A_MEDIATED_IL10_SYNTHESIS	REACTOME_FCGR3A_MEDIATED_IL10_SYNTHESIS	REACTOME_FCGR3A_MEDIATED_IL10_SYNTHESIS	21551	20/4668	0.22502	0.451681	0.406436	Itpr1	1	REACTOME	down	NP
REACTOME_SIGNALING_BY_NOTCH21	REACTOME_SIGNALING_BY_NOTCH2	REACTOME_SIGNALING_BY_NOTCH2	21551	20/4668	0.22502	0.451681	0.406436	Maml3	1	REACTOME	down	NP
REACTOME_SYNTHESIS_OF_BILE_ACIDS_AND_BILE_SALTS_VIA_7ALPHA_HYDROXYCHOLESTEROL1	REACTOME_SYNTHESIS_OF_BILE_ACIDS_AND_BILE_SALTS_VIA_7ALPHA_HYDROXYCHOLESTEROL	REACTOME_SYNTHESIS_OF_BILE_ACIDS_AND_BILE_SALTS_VIA_7ALPHA_HYDROXYCHOLESTEROL	21551	20/4668	0.22502	0.451681	0.406436	Cyp7b1	1	REACTOME	down	NP
REACTOME_INTRA_GOLGI_AND_RETROGRADE_GOLGI_TO_ER_TRAFFIC	REACTOME_INTRA_GOLGI_AND_RETROGRADE_GOLGI_TO_ER_TRAFFIC	REACTOME_INTRA_GOLGI_AND_RETROGRADE_GOLGI_TO_ER_TRAFFIC	21610	130/4668	0.225841	0.451681	0.406436	Cyth4/Man2a1/Arfgap1	3	REACTOME	down	NP
REACTOME_BMAL1_CLOCK_NPAS2_ACTIVATES_CIRCADIAN_GENE_EXPRESSION	REACTOME_BMAL1_CLOCK_NPAS2_ACTIVATES_CIRCADIAN_GENE_EXPRESSION	REACTOME_BMAL1_CLOCK_NPAS2_ACTIVATES_CIRCADIAN_GENE_EXPRESSION	21551	21/4668	0.234858	0.457899	0.412031	Helz2	1	REACTOME	down	NP
REACTOME_CA_DEPENDENT_EVENTS	REACTOME_CA_DEPENDENT_EVENTS	REACTOME_CA_DEPENDENT_EVENTS	21551	21/4668	0.234858	0.457899	0.412031	Nbea	1	REACTOME	down	NP
REACTOME_FCERI_MEDIATED_CA_2_MOBILIZATION	REACTOME_FCERI_MEDIATED_CA_2_MOBILIZATION	REACTOME_FCERI_MEDIATED_CA_2_MOBILIZATION	21551	21/4668	0.234858	0.457899	0.412031	Itpr1	1	REACTOME	down	NP
REACTOME_NICOTINATE_METABOLISM1	REACTOME_NICOTINATE_METABOLISM	REACTOME_NICOTINATE_METABOLISM	21551	21/4668	0.234858	0.457899	0.412031	Parp14	1	REACTOME	down	NP
REACTOME_ANTIGEN_PRESENTATION_FOLDING_ASSEMBLY_AND_PEPTIDE_LOADING_OF_CLASS_I_MHC1	REACTOME_ANTIGEN_PRESENTATION_FOLDING_ASSEMBLY_AND_PEPTIDE_LOADING_OF_CLASS_I_MHC	REACTOME_ANTIGEN_PRESENTATION_FOLDING_ASSEMBLY_AND_PEPTIDE_LOADING_OF_CLASS_I_MHC	21551	22/4668	0.244572	0.465137	0.418545	Tap1	1	REACTOME	down	NP
REACTOME_ION_HOMEOSTASIS	REACTOME_ION_HOMEOSTASIS	REACTOME_ION_HOMEOSTASIS	21551	22/4668	0.244572	0.465137	0.418545	Itpr1	1	REACTOME	down	NP
REACTOME_LYSOSOME_VESICLE_BIOGENESIS	REACTOME_LYSOSOME_VESICLE_BIOGENESIS	REACTOME_LYSOSOME_VESICLE_BIOGENESIS	21551	22/4668	0.244572	0.465137	0.418545	App	1	REACTOME	down	NP
REACTOME_TAK1_ACTIVATES_NFKB_BY_PHOSPHORYLATION_AND_ACTIVATION_OF_IKKS_COMPLEX1	REACTOME_TAK1_ACTIVATES_NFKB_BY_PHOSPHORYLATION_AND_ACTIVATION_OF_IKKS_COMPLEX	REACTOME_TAK1_ACTIVATES_NFKB_BY_PHOSPHORYLATION_AND_ACTIVATION_OF_IKKS_COMPLEX	21551	22/4668	0.244572	0.465137	0.418545	App	1	REACTOME	down	NP
REACTOME_SIGNALING_BY_VEGF1	REACTOME_SIGNALING_BY_VEGF	REACTOME_SIGNALING_BY_VEGF	21582	76/4668	0.249479	0.466271	0.419565	Itpr1/Axl	2	REACTOME	down	NP
REACTOME_ARACHIDONIC_ACID_METABOLISM1	REACTOME_ARACHIDONIC_ACID_METABOLISM	REACTOME_ARACHIDONIC_ACID_METABOLISM	21551	23/4668	0.254165	0.466271	0.419565	Ptgs1	1	REACTOME	down	NP
REACTOME_DEADENYLATION_OF_MRNA	REACTOME_DEADENYLATION_OF_MRNA	REACTOME_DEADENYLATION_OF_MRNA	21551	23/4668	0.254165	0.466271	0.419565	Eif4a1	1	REACTOME	down	NP
REACTOME_NOTCH_HLH_TRANSCRIPTION_PATHWAY	REACTOME_NOTCH_HLH_TRANSCRIPTION_PATHWAY	REACTOME_NOTCH_HLH_TRANSCRIPTION_PATHWAY	21551	23/4668	0.254165	0.466271	0.419565	Maml3	1	REACTOME	down	NP
REACTOME_REGULATION_OF_BETA_CELL_DEVELOPMENT	REACTOME_REGULATION_OF_BETA_CELL_DEVELOPMENT	REACTOME_REGULATION_OF_BETA_CELL_DEVELOPMENT	21551	23/4668	0.254165	0.466271	0.419565	Maml3	1	REACTOME	down	NP
REACTOME_TCR_SIGNALING1	REACTOME_TCR_SIGNALING	REACTOME_TCR_SIGNALING	21582	77/4668	0.254193	0.466271	0.419565	Ptprj/H2-Ab1	2	REACTOME	down	NP
REACTOME_DOWNSTREAM_SIGNAL_TRANSDUCTION	REACTOME_DOWNSTREAM_SIGNAL_TRANSDUCTION	REACTOME_DOWNSTREAM_SIGNAL_TRANSDUCTION	21551	24/4668	0.263639	0.469701	0.422652	Stat1	1	REACTOME	down	NP
REACTOME_HEPARAN_SULFATE_HEPARIN_HS_GAG_METABOLISM	REACTOME_HEPARAN_SULFATE_HEPARIN_HS_GAG_METABOLISM	REACTOME_HEPARAN_SULFATE_HEPARIN_HS_GAG_METABOLISM	21551	24/4668	0.263639	0.469701	0.422652	Ext1	1	REACTOME	down	NP
REACTOME_RND2_GTPASE_CYCLE	REACTOME_RND2_GTPASE_CYCLE	REACTOME_RND2_GTPASE_CYCLE	21551	24/4668	0.263639	0.469701	0.422652	Pkp4	1	REACTOME	down	NP
REACTOME_RND3_GTPASE_CYCLE	REACTOME_RND3_GTPASE_CYCLE	REACTOME_RND3_GTPASE_CYCLE	21551	24/4668	0.263639	0.469701	0.422652	Pkp4	1	REACTOME	down	NP
REACTOME_SUMOYLATION_OF_INTRACELLULAR_RECEPTORS	REACTOME_SUMOYLATION_OF_INTRACELLULAR_RECEPTORS	REACTOME_SUMOYLATION_OF_INTRACELLULAR_RECEPTORS	21551	24/4668	0.263639	0.469701	0.422652	Thrb	1	REACTOME	down	NP
REACTOME_METABOLISM_OF_CARBOHYDRATES1	REACTOME_METABOLISM_OF_CARBOHYDRATES	REACTOME_METABOLISM_OF_CARBOHYDRATES	21610	143/4668	0.270141	0.475439	0.427814	St3gal4/Cd44/Ext1	3	REACTOME	down	NP
REACTOME_APOPTOTIC_CLEAVAGE_OF_CELLULAR_PROTEINS	REACTOME_APOPTOTIC_CLEAVAGE_OF_CELLULAR_PROTEINS	REACTOME_APOPTOTIC_CLEAVAGE_OF_CELLULAR_PROTEINS	21551	25/4668	0.272994	0.475439	0.427814	Casp7	1	REACTOME	down	NP
REACTOME_DNA_DAMAGE_BYPASS1	REACTOME_DNA_DAMAGE_BYPASS	REACTOME_DNA_DAMAGE_BYPASS	21551	25/4668	0.272994	0.475439	0.427814	Uba7	1	REACTOME	down	NP
REACTOME_RND1_GTPASE_CYCLE	REACTOME_RND1_GTPASE_CYCLE	REACTOME_RND1_GTPASE_CYCLE	21551	25/4668	0.272994	0.475439	0.427814	Pkp4	1	REACTOME	down	NP
REACTOME_CLASS_A_1_RHODOPSIN_LIKE_RECEPTORS1	REACTOME_CLASS_A_1_RHODOPSIN_LIKE_RECEPTORS	REACTOME_CLASS_A_1_RHODOPSIN_LIKE_RECEPTORS	21551	26/4668	0.282232	0.483381	0.434961	App	1	REACTOME	down	NP
REACTOME_IRS_MEDIATED_SIGNALLING	REACTOME_IRS_MEDIATED_SIGNALLING	REACTOME_IRS_MEDIATED_SIGNALLING	21551	26/4668	0.282232	0.483381	0.434961	Gab2	1	REACTOME	down	NP
REACTOME_SYNTHESIS_OF_BILE_ACIDS_AND_BILE_SALTS1	REACTOME_SYNTHESIS_OF_BILE_ACIDS_AND_BILE_SALTS	REACTOME_SYNTHESIS_OF_BILE_ACIDS_AND_BILE_SALTS	21551	26/4668	0.282232	0.483381	0.434961	Cyp7b1	1	REACTOME	down	NP
REACTOME_INTERLEUKIN_1_FAMILY_SIGNALING1	REACTOME_INTERLEUKIN_1_FAMILY_SIGNALING	REACTOME_INTERLEUKIN_1_FAMILY_SIGNALING	21582	84/4668	0.28722	0.489221	0.440216	App/Gsdmd	2	REACTOME	down	NP
REACTOME_INOSITOL_PHOSPHATE_METABOLISM1	REACTOME_INOSITOL_PHOSPHATE_METABOLISM	REACTOME_INOSITOL_PHOSPHATE_METABOLISM	21551	27/4668	0.291355	0.49087	0.4417	Pld4	1	REACTOME	down	NP
REACTOME_SYNTHESIS_OF_SUBSTRATES_IN_N_GLYCAN_BIOSYTHESIS	REACTOME_SYNTHESIS_OF_SUBSTRATES_IN_N_GLYCAN_BIOSYTHESIS	REACTOME_SYNTHESIS_OF_SUBSTRATES_IN_N_GLYCAN_BIOSYTHESIS	21551	27/4668	0.291355	0.49087	0.4417	St3gal4	1	REACTOME	down	NP
REACTOME_BETA_CATENIN_INDEPENDENT_WNT_SIGNALING1	REACTOME_BETA_CATENIN_INDEPENDENT_WNT_SIGNALING	REACTOME_BETA_CATENIN_INDEPENDENT_WNT_SIGNALING	21582	86/4668	0.296644	0.49708	0.447287	Arrb2/Itpr1	2	REACTOME	down	NP
REACTOME_CA2_PATHWAY	REACTOME_CA2_PATHWAY	REACTOME_CA2_PATHWAY	21551	29/4668	0.30926	0.50995	0.458869	Itpr1	1	REACTOME	down	NP
REACTOME_DISEASES_OF_PROGRAMMED_CELL_DEATH	REACTOME_DISEASES_OF_PROGRAMMED_CELL_DEATH	REACTOME_DISEASES_OF_PROGRAMMED_CELL_DEATH	21551	29/4668	0.30926	0.50995	0.458869	App	1	REACTOME	down	NP
REACTOME_SIGNALING_BY_TYPE_1_INSULIN_LIKE_GROWTH_FACTOR_1_RECEPTOR_IGF1R	REACTOME_SIGNALING_BY_TYPE_1_INSULIN_LIKE_GROWTH_FACTOR_1_RECEPTOR_IGF1R	REACTOME_SIGNALING_BY_TYPE_1_INSULIN_LIKE_GROWTH_FACTOR_1_RECEPTOR_IGF1R	21551	29/4668	0.30926	0.50995	0.458869	Gab2	1	REACTOME	down	NP
REACTOME_ECM_PROTEOGLYCANS	REACTOME_ECM_PROTEOGLYCANS	REACTOME_ECM_PROTEOGLYCANS	21551	30/4668	0.318045	0.512015	0.460726	App	1	REACTOME	down	NP
REACTOME_INSULIN_RECEPTOR_SIGNALLING_CASCADE	REACTOME_INSULIN_RECEPTOR_SIGNALLING_CASCADE	REACTOME_INSULIN_RECEPTOR_SIGNALLING_CASCADE	21551	30/4668	0.318045	0.512015	0.460726	Gab2	1	REACTOME	down	NP
REACTOME_MAP2K_AND_MAPK_ACTIVATION1	REACTOME_MAP2K_AND_MAPK_ACTIVATION	REACTOME_MAP2K_AND_MAPK_ACTIVATION	21551	30/4668	0.318045	0.512015	0.460726	Arrb2	1	REACTOME	down	NP
REACTOME_SPHINGOLIPID_DE_NOVO_BIOSYNTHESIS	REACTOME_SPHINGOLIPID_DE_NOVO_BIOSYNTHESIS	REACTOME_SPHINGOLIPID_DE_NOVO_BIOSYNTHESIS	21551	30/4668	0.318045	0.512015	0.460726	Cers6	1	REACTOME	down	NP
REACTOME_REGULATION_OF_LIPID_METABOLISM_BY_PPARALPHA1	REACTOME_REGULATION_OF_LIPID_METABOLISM_BY_PPARALPHA	REACTOME_REGULATION_OF_LIPID_METABOLISM_BY_PPARALPHA	21582	92/4668	0.324805	0.512015	0.460726	Rgl1/Helz2	2	REACTOME	down	NP
REACTOME_AMINO_ACIDS_REGULATE_MTORC1	REACTOME_AMINO_ACIDS_REGULATE_MTORC1	REACTOME_AMINO_ACIDS_REGULATE_MTORC1	21551	31/4668	0.32672	0.512015	0.460726	Tcirg1	1	REACTOME	down	NP
REACTOME_AMYLOID_FIBER_FORMATION1	REACTOME_AMYLOID_FIBER_FORMATION	REACTOME_AMYLOID_FIBER_FORMATION	21551	31/4668	0.32672	0.512015	0.460726	App	1	REACTOME	down	NP
REACTOME_COSTIMULATION_BY_THE_CD28_FAMILY	REACTOME_COSTIMULATION_BY_THE_CD28_FAMILY	REACTOME_COSTIMULATION_BY_THE_CD28_FAMILY	21551	31/4668	0.32672	0.512015	0.460726	H2-Ab1	1	REACTOME	down	NP
REACTOME_CYTOCHROME_P450_ARRANGED_BY_SUBSTRATE_TYPE1	REACTOME_CYTOCHROME_P450_ARRANGED_BY_SUBSTRATE_TYPE	REACTOME_CYTOCHROME_P450_ARRANGED_BY_SUBSTRATE_TYPE	21551	31/4668	0.32672	0.512015	0.460726	Cyp7b1	1	REACTOME	down	NP
REACTOME_PLATELET_ACTIVATION_SIGNALING_AND_AGGREGATION1	REACTOME_PLATELET_ACTIVATION_SIGNALING_AND_AGGREGATION	REACTOME_PLATELET_ACTIVATION_SIGNALING_AND_AGGREGATION	21610	160/4668	0.329408	0.512015	0.460726	Arrb2/App/Itpr1	3	REACTOME	down	NP
REACTOME_FC_EPSILON_RECEPTOR_FCERI_SIGNALING1	REACTOME_FC_EPSILON_RECEPTOR_FCERI_SIGNALING	REACTOME_FC_EPSILON_RECEPTOR_FCERI_SIGNALING	21582	94/4668	0.334138	0.512015	0.460726	Gab2/Itpr1	2	REACTOME	down	NP
REACTOME_APOPTOTIC_EXECUTION_PHASE	REACTOME_APOPTOTIC_EXECUTION_PHASE	REACTOME_APOPTOTIC_EXECUTION_PHASE	21551	32/4668	0.335287	0.512015	0.460726	Casp7	1	REACTOME	down	NP
REACTOME_BILE_ACID_AND_BILE_SALT_METABOLISM1	REACTOME_BILE_ACID_AND_BILE_SALT_METABOLISM	REACTOME_BILE_ACID_AND_BILE_SALT_METABOLISM	21551	32/4668	0.335287	0.512015	0.460726	Cyp7b1	1	REACTOME	down	NP
REACTOME_INTERLEUKIN_12_FAMILY_SIGNALING1	REACTOME_INTERLEUKIN_12_FAMILY_SIGNALING	REACTOME_INTERLEUKIN_12_FAMILY_SIGNALING	21551	32/4668	0.335287	0.512015	0.460726	Stat1	1	REACTOME	down	NP
REACTOME_STIMULI_SENSING_CHANNELS1	REACTOME_STIMULI_SENSING_CHANNELS	REACTOME_STIMULI_SENSING_CHANNELS	21551	32/4668	0.335287	0.512015	0.460726	Trpm2	1	REACTOME	down	NP
REACTOME_CYTOPROTECTION_BY_HMOX11	REACTOME_CYTOPROTECTION_BY_HMOX1	REACTOME_CYTOPROTECTION_BY_HMOX1	21582	95/4668	0.338791	0.514789	0.463223	Taco1/Helz2	2	REACTOME	down	NP
REACTOME_REGULATED_NECROSIS1	REACTOME_REGULATED_NECROSIS	REACTOME_REGULATED_NECROSIS	21551	33/4668	0.343747	0.514789	0.463223	Gsdmd	1	REACTOME	down	NP
REACTOME_SIGNALING_BY_ERBB41	REACTOME_SIGNALING_BY_ERBB4	REACTOME_SIGNALING_BY_ERBB4	21551	33/4668	0.343747	0.514789	0.463223	Egfr	1	REACTOME	down	NP
REACTOME_SIGNALING_BY_PTK61	REACTOME_SIGNALING_BY_PTK6	REACTOME_SIGNALING_BY_PTK6	21551	33/4668	0.343747	0.514789	0.463223	Egfr	1	REACTOME	down	NP
REACTOME_ACTIVATION_OF_NMDA_RECEPTORS_AND_POSTSYNAPTIC_EVENTS	REACTOME_ACTIVATION_OF_NMDA_RECEPTORS_AND_POSTSYNAPTIC_EVENTS	REACTOME_ACTIVATION_OF_NMDA_RECEPTORS_AND_POSTSYNAPTIC_EVENTS	21551	34/4668	0.3521	0.519243	0.46723	Nbea	1	REACTOME	down	NP
REACTOME_EXTRA_NUCLEAR_ESTROGEN_SIGNALING	REACTOME_EXTRA_NUCLEAR_ESTROGEN_SIGNALING	REACTOME_EXTRA_NUCLEAR_ESTROGEN_SIGNALING	21551	34/4668	0.3521	0.519243	0.46723	Egfr	1	REACTOME	down	NP
REACTOME_BIOLOGICAL_OXIDATIONS1	REACTOME_BIOLOGICAL_OXIDATIONS	REACTOME_BIOLOGICAL_OXIDATIONS	21582	98/4668	0.352696	0.519243	0.46723	Cyp7b1/Ptgs1	2	REACTOME	down	NP
REACTOME_METABOLISM_OF_STEROIDS1	REACTOME_METABOLISM_OF_STEROIDS	REACTOME_METABOLISM_OF_STEROIDS	21582	99/4668	0.357311	0.519243	0.46723	Cyp7b1/Helz2	2	REACTOME	down	NP
REACTOME_CARDIAC_CONDUCTION	REACTOME_CARDIAC_CONDUCTION	REACTOME_CARDIAC_CONDUCTION	21551	35/4668	0.360349	0.519243	0.46723	Itpr1	1	REACTOME	down	NP
REACTOME_IRON_UPTAKE_AND_TRANSPORT1	REACTOME_IRON_UPTAKE_AND_TRANSPORT	REACTOME_IRON_UPTAKE_AND_TRANSPORT	21551	35/4668	0.360349	0.519243	0.46723	Tcirg1	1	REACTOME	down	NP
REACTOME_SIGNALING_BY_ERBB21	REACTOME_SIGNALING_BY_ERBB2	REACTOME_SIGNALING_BY_ERBB2	21551	35/4668	0.360349	0.519243	0.46723	Egfr	1	REACTOME	down	NP
REACTOME_SIGNALING_BY_MODERATE_KINASE_ACTIVITY_BRAF_MUTANTS1	REACTOME_SIGNALING_BY_MODERATE_KINASE_ACTIVITY_BRAF_MUTANTS	REACTOME_SIGNALING_BY_MODERATE_KINASE_ACTIVITY_BRAF_MUTANTS	21551	35/4668	0.360349	0.519243	0.46723	Arrb2	1	REACTOME	down	NP
REACTOME_ACTIVATION_OF_GENE_EXPRESSION_BY_SREBF_SREBP1	REACTOME_ACTIVATION_OF_GENE_EXPRESSION_BY_SREBF_SREBP	REACTOME_ACTIVATION_OF_GENE_EXPRESSION_BY_SREBF_SREBP	21551	36/4668	0.368495	0.519243	0.46723	Helz2	1	REACTOME	down	NP
[truncated: 2,012 more rows]
