# Supplementary material for: Size-dependent plastic exposure disrupts macrophage function and tissue-specific metabolism
Source: Research Square preprint supplement (doi:10.21203/rs.3.rs-6204281/v1), 2025-03-18
Supplement: Supplementary file 2 [file 0e5299ddc4064639382715c6.xlsx]

## Sheet: Sheet1
Gene	Forward primer	Reverse primer
Col1a1	GAGATGATGGGGAAGCTGGC	CTCGGTGTCCCTTCATTCCG
Col5a1	CTTGTCCGATGGCAAGTGGC	CATCATCCAGAATCCGGGAGC
Fibronectin	CTCCGAGACCAGTGCATCG	GAATCTTGGCACTGGTCAATGG
Tenascin C	CCACACTCACAGGTCTAAGGC	GATGGTTGCTGGATCACTCTCC
Tgfb	GACCGCAACAACGCCATCTAT	CAATGGGGGTTCGGGCACTG
Tatabp	GAGCTCTGGAATTGTACCGCAG	CATGATGACTGCAGCAAATCGC
Hprt	TCCCAGCGTCGTGATTAGCGATGA	AATGTGATGGCCTCCCATCTCCTTCATGACAT
