# Supplementary material for: Size-dependent plastic exposure disrupts macrophage function and tissue-specific metabolism
Source: Research Square preprint supplement (doi:10.21203/rs.3.rs-6204281/v1), 2025-03-18
Supplement: Supplementary file 3 [file 5da5047a115681b0099036d4.xlsx]

## Sheet: Sheet1
Antigen	Conjugate	Clone	Cat #	Vendor
CD11b	PE-Cy7	M1/70	101216	Biolegend
CD11b	BUV-661	M1/70	612977	BD Biosciences
CD11b	BUV737	M1/70	612800	BD Biosciences
CD11c	BV605	N418	564079	Biolegend
CD19	APC-Cy7	6D5	115530	Biolegend
CD206	BV711	C068C2	141727	Biolegend
CD31	FITC	390	102406	Biolegend
CD31	BUV661	390	741505	BD Biosciences
CD43	BUV-496	S7	741067	BD Biosciences
CD45	BUV-805	30-F11	568336	BD Biosciences
CD64	FITC	X54.5/7.0	139316	Biolegend
CD64	PerCP-Cy5.5	X54.5/7.0	139308	Biolegend
CD64	PE-Cy7	X54.5/7.0	139314	Biolegend
Clec2	APC	17D9	146106	Biolegend
CX3CR1	APC	SA011F11	149008	Biolegend
CX3CR1	BV711	SA011F11	149031	Biolegend
F4/80	BV510	T45-2342	743280	BD Biosciences
F4/80	BV421	BM8	123132	Biolegend
Ly-6C	APC-Cy7	HK1.4	128026	Biolegend
Ly-6C	BV510	HK1.4	128033	Biolegend
Ly-6G	PerCP-Cy5.5	1A8	127616	Biolegend
MARCO	APC	579511	FAB2956A	R&D Systems
MHCII	AF 700	M5/113.15.2	107622	Biolegend
SiglecF	BUV-395	E50-2440	740280	BD Biosciences
Tcr-ß	APC/Cy7	H57-597	109220	Biolegend
TER-119	APC/Fire™ 750	TER-119	116250	Biolegend
Tim-4	AF647	RMT4-54	130008	Biolegend
Tim-4	BUV-563	RMT4-54	749135	BD Biosciences
Vsig4	PE-Cy7	NLA14	25-5752-82	ThermoFisher Scientific
XCR1	APC-Cy7	ZET	148224	Biolegend
XCR1	BV650	ZET	148220	Biolegend
Iba1	-	EPR16589	ab178847	Abcam
CD31	-	2H8	MA3105	ThermoFisher Scientific
CD68	-	FA-11	137001	Biolegend
Goat α-rabbit	AF488	-	A-11008	ThermoFisher Scientific
Goat α-rabbit	AF647	-	A21244	ThermoFisher Scientific
Goat α-rat	AF647	-	405416	ThermoFisher Scientific
Goat α-hamster	DyLight™ 649	-	405505	Biolegend
