# Supplementary material for: Size-dependent plastic exposure disrupts macrophage function and tissue-specific metabolism
Source: Research Square preprint supplement (doi:10.21203/rs.3.rs-6204281/v1), 2025-03-18
Supplement: Supplementary file 4 [file db2ea5090b0c9c3aaac71b08.xlsx]

## Sheet: PBS vs 50 nm
Cluster	p_val	avg_log2FC	pct.1	pct.2	p_val_adj	gene
Cluster_Astrocytes	1.41781e-71	-0.389322	0.809	0.859	3.51618e-69	Ntsr2
Cluster_Astrocytes	6.55581e-33	-0.381807	0.535	0.605	1.62584e-30	Mapk4
Cluster_Astrocytes	1.00302e-15	0.433007	0.275	0.216	2.48748e-13	Cobll1
Cluster_Astrocytes	3.6248e-14	0.291089	0.498	0.433	8.9895e-12	Gfap
Cluster_Astrocytes	3.54176e-07	-0.391113	0.218	0.25	8.78357e-05	Vat1l
Cluster_Astrocytes	7.60309e-07	-0.255927	0.288	0.323	0.000188557	Cacna2d2
Cluster_CA1/CA3/ProS	6.39765e-29	-0.508581	0.945	0.988	1.58662e-26	Arc
Cluster_CA1/CA3/ProS	4.94162e-10	-0.438464	0.406	0.545	1.22552e-07	Ntsr2
Cluster_CA1/CA3/ProS	1.33079e-08	0.646922	0.359	0.25	3.30036e-06	Vwc2l
Cluster_CA1/CA3/ProS	1.12953e-06	-0.721159	0.184	0.271	0.000280125	Fos
Cluster_CA1/CA3/ProS	1.26162e-06	0.310973	0.645	0.542	0.000312882	Bcl11b
Cluster_CA1/CA3/ProS	1.02336e-05	0.341708	0.574	0.499	0.00253793	Cntn6
Cluster_CA1/CA3/ProS	4.13659e-05	0.386095	0.413	0.332	0.0102587	Chrm2
Cluster_CA1/CA3/ProS	0.0001469	0.277003	0.72	0.666	0.0364312	Parm1
Cluster_CA1/CA3/ProS	0.000642146	0.495827	0.268	0.205	0.159252	Hpcal1
Cluster_CA1/CA3/ProS	0.000659908	0.293749	0.542	0.471	0.163657	Satb2
Cluster_CA1/CA3/ProS	0.00104925	-0.417167	0.389	0.443	0.260214	Acsbg1
Cluster_CA1/CA3/ProS	0.00190597	0.293301	0.477	0.424	0.472681	Slc44a5
Cluster_CA1/CA3/ProS	0.00247131	0.326987	0.292	0.235	0.612885	Kcnh5
Cluster_CA1/CA3/ProS	0.00549518	0.323462	0.342	0.288	1	Angpt1
Cluster_CA1/CA3/ProS	0.00592547	0.320182	0.281	0.228	1	Cux2
Cluster_CA1/CA3/ProS	0.00663175	0.34376	0.341	0.291	1	Rasl10a
Cluster_CA1/CA3/ProS	0.0300383	0.251673	0.308	0.267	1	Htr1f
Cluster_CA1/CA3/ProS	0.0507919	0.366045	0.256	0.22	1	Necab1
Cluster_CA1/CA3/ProS	0.0733403	-0.30718	0.248	0.28	1	Syt2
Cluster_Cajal-Retzius cells	2.55345e-62	-0.633073	0.666	0.781	6.33256e-60	Ntsr2
Cluster_Cajal-Retzius cells	2.67637e-36	-0.331282	0.799	0.871	6.6374e-34	Vat1l
Cluster_Cajal-Retzius cells	7.72643e-28	0.461265	0.67	0.583	1.91615e-25	Cabp7
Cluster_Cajal-Retzius cells	2.09042e-19	0.300862	0.679	0.59	5.18424e-17	Vwc2l
Cluster_Cajal-Retzius cells	6.84031e-19	-0.608228	0.284	0.371	1.6964e-16	Gfra2
Cluster_Cajal-Retzius cells	3.36346e-18	0.438508	0.632	0.563	8.34139e-16	Syt2
Cluster_Cajal-Retzius cells	2.08386e-16	0.40318	0.398	0.308	5.16797e-14	Pvalb
Cluster_Cajal-Retzius cells	3.93211e-14	0.258311	0.79	0.752	9.75162e-12	Chrm2
Cluster_Cajal-Retzius cells	1.40651e-13	-0.268313	0.573	0.647	3.48814e-11	Nell1
Cluster_Cajal-Retzius cells	1.59247e-12	0.280042	0.465	0.385	3.94933e-10	Foxp2
Cluster_Cajal-Retzius cells	1.97981e-12	0.297954	0.531	0.461	4.90994e-10	Ebf3
Cluster_Cajal-Retzius cells	5.05984e-12	-0.574241	0.421	0.483	1.25484e-09	Gad1
Cluster_Cajal-Retzius cells	7.86464e-11	0.341104	0.468	0.406	1.95043e-08	Zfp536
Cluster_Cajal-Retzius cells	8.2101e-11	0.280664	0.613	0.556	2.03611e-08	Nrn1
Cluster_Cajal-Retzius cells	5.07044e-10	-0.563389	0.2	0.255	1.25747e-07	Tmem132d
Cluster_Cajal-Retzius cells	2.54555e-09	-0.501524	0.225	0.278	6.31296e-07	Sox11
Cluster_Cajal-Retzius cells	7.99761e-09	-0.400577	0.273	0.329	1.98341e-06	Rab3b
Cluster_Cajal-Retzius cells	1.40957e-07	0.443193	0.256	0.208	3.49574e-05	Cobll1
Cluster_Cajal-Retzius cells	1.46912e-07	0.289412	0.344	0.286	3.64342e-05	Myo16
Cluster_Cajal-Retzius cells	9.2827e-07	-0.280193	0.371	0.416	0.000230211	Sdk2
Cluster_Cajal-Retzius cells	4.20902e-06	-0.364283	0.395	0.432	0.00104384	Nr2f2
Cluster_Cajal-Retzius cells	2.00654e-05	-0.278134	0.252	0.294	0.00497621	Cbln1
Cluster_Cajal-Retzius cells	4.40033e-05	-0.273699	0.253	0.291	0.0109128	2010300C02Rik
Cluster_Cajal-Retzius cells	8.70413e-05	-0.382003	0.468	0.497	0.0215862	Gad2
Cluster_Cajal-Retzius cells	0.000689942	0.252501	0.389	0.358	0.171106	Sncg
Cluster_Endothelial cells	7.7139e-34	0.396922	0.634	0.51	1.91305e-31	Cobll1
Cluster_Endothelial cells	2.59031e-24	-0.324286	0.64	0.703	6.42396e-22	Ntsr2
Cluster_Endothelial cells	3.45941e-17	0.344706	0.417	0.328	8.57934e-15	Cldn5
Cluster_Endothelial cells	1.00484e-07	-0.284994	0.413	0.45	2.49201e-05	Kctd12
Cluster_Endothelial cells	0.000295389	-0.300236	0.296	0.323	0.0732566	Nostrin
Cluster_Endothelial cells	0.00435101	-0.258538	0.32	0.337	1	Unc13c
Cluster_L2/3/6 IT ENT	1.07553e-84	-0.731252	0.626	0.76	2.66731e-82	Ntsr2
Cluster_L2/3/6 IT ENT	3.5265e-28	-0.334781	0.729	0.819	8.74572e-26	Gucy1a1
Cluster_L2/3/6 IT ENT	5.1859e-28	-0.591065	0.392	0.51	1.2861e-25	Rmst
Cluster_L2/3/6 IT ENT	2.71462e-27	-0.308731	0.726	0.798	6.73226e-25	Cntn6
Cluster_L2/3/6 IT ENT	2.36555e-26	-0.458546	0.591	0.673	5.86656e-24	Sema3a
Cluster_L2/3/6 IT ENT	1.05687e-24	-0.295533	0.628	0.759	2.62103e-22	Rprm
Cluster_L2/3/6 IT ENT	3.46789e-22	-0.377959	0.517	0.612	8.60037e-20	Cux2
Cluster_L2/3/6 IT ENT	3.20595e-19	0.297599	0.668	0.578	7.95076e-17	Meis2
Cluster_L2/3/6 IT ENT	2.25646e-17	1.30726	0.297	0.235	5.59601e-15	Pde11a
Cluster_L2/3/6 IT ENT	3.81461e-17	-0.271371	0.713	0.763	9.46023e-15	Lyz2
Cluster_L2/3/6 IT ENT	3.38119e-14	0.261266	0.715	0.665	8.38536e-12	Sipa1l3
Cluster_L2/3/6 IT ENT	5.95672e-14	0.547589	0.335	0.261	1.47727e-11	Fezf2
Cluster_L2/3/6 IT ENT	6.42968e-13	-0.378716	0.318	0.392	1.59456e-10	Zfp536
Cluster_L2/3/6 IT ENT	6.9253e-12	0.550612	0.288	0.224	1.71747e-09	Trpc4
Cluster_L2/3/6 IT ENT	7.50156e-12	-0.455972	0.218	0.285	1.86039e-09	Fhod3
Cluster_L2/3/6 IT ENT	1.33019e-11	0.303471	0.601	0.547	3.29887e-09	Sox11
Cluster_L2/3/6 IT ENT	2.33606e-11	-0.311217	0.407	0.474	5.79343e-09	Cpne8
Cluster_L2/3/6 IT ENT	7.00972e-11	-0.276011	0.448	0.521	1.73841e-08	Chrm2
Cluster_L2/3/6 IT ENT	1.51876e-09	0.544145	0.517	0.471	3.76653e-07	Cabp7
Cluster_L2/3/6 IT ENT	7.33244e-09	-0.354863	0.426	0.476	1.81844e-06	Plcxd2
Cluster_L2/3/6 IT ENT	1.12571e-08	-0.459628	0.241	0.294	2.79177e-06	Ndst4
Cluster_L2/3/6 IT ENT	1.16621e-08	-0.302607	0.372	0.431	2.8922e-06	Igsf21
Cluster_L2/3/6 IT ENT	3.09439e-08	-0.266759	0.377	0.43	7.67408e-06	Rab3b
Cluster_L2/3/6 IT ENT	3.92017e-08	0.373022	0.494	0.451	9.72203e-06	Tanc1
Cluster_L2/3/6 IT ENT	1.30473e-07	-0.386612	0.3	0.35	3.23573e-05	Gm19410
Cluster_L2/3/6 IT ENT	2.13682e-07	-0.280986	0.372	0.422	5.29931e-05	Rims3
Cluster_L2/3/6 IT ENT	2.21639e-07	-0.359769	0.547	0.579	5.49665e-05	Plcxd3
Cluster_L2/3/6 IT ENT	2.58711e-07	0.688007	0.325	0.284	6.41602e-05	Igfbp4
Cluster_L2/3/6 IT ENT	3.0425e-07	0.250385	0.528	0.483	7.5454e-05	Parm1
Cluster_L2/3/6 IT ENT	3.61286e-07	-0.314054	0.249	0.3	8.9599e-05	Vwc2l
Cluster_L2/3/6 IT ENT	3.68574e-07	0.326638	0.337	0.285	9.14065e-05	Sdk2
Cluster_L2/3/6 IT ENT	3.15677e-06	0.316316	0.444	0.402	0.00078288	Bdnf
Cluster_L2/3/6 IT ENT	1.61664e-05	0.9182	0.334	0.306	0.00400926	Calb2
Cluster_L2/3/6 IT ENT	4.09175e-05	0.309092	0.323	0.286	0.0101475	Galnt14
Cluster_L2/3/6 IT ENT	0.000196234	0.262374	0.43	0.397	0.0486661	Slc44a5
Cluster_L2/3/6 IT ENT	0.0011486	0.562714	0.46	0.455	0.284853	Col6a1
Cluster_L2/3/6 IT ENT	0.00141515	0.260479	0.25	0.221	0.350957	Tle4
Cluster_L2/3/6 IT ENT	0.00293451	0.298862	0.264	0.241	0.727757	Adamtsl1
Cluster_L2/3/6 IT ENT	0.00425043	0.321897	0.296	0.268	1	Pdgfra
Cluster_L2/3/6 IT ENT	0.0439785	0.30001	0.396	0.39	1	Prr16
Cluster_L4/5 IT CTX	3.74856e-83	-0.419406	0.994	0.997	9.29643e-81	Arc
Cluster_L4/5 IT CTX	2.39415e-23	0.30962	0.854	0.748	5.93749e-21	Satb2
Cluster_L4/5 IT CTX	7.19892e-23	0.459685	0.765	0.678	1.78533e-20	Rorb
Cluster_L4/5 IT CTX	1.09688e-18	0.265622	0.872	0.778	2.72027e-16	Epha4
Cluster_L4/5 IT CTX	2.57267e-16	0.387884	0.562	0.421	6.38023e-14	Prdm8
Cluster_L4/5 IT CTX	6.39498e-14	0.292029	0.738	0.62	1.58596e-11	Chrm2
Cluster_L4/5 IT CTX	2.60769e-11	-0.379743	0.703	0.704	6.46707e-09	Ntsr2
Cluster_L4/5 IT CTX	3.81464e-11	0.255481	0.686	0.565	9.4603e-09	Prr16
Cluster_L4/5 IT CTX	1.14764e-10	0.360801	0.375	0.281	2.84616e-08	Pde7b
Cluster_L4/5 IT CTX	1.25893e-10	0.264626	0.762	0.657	3.12215e-08	Ppp1r1b
Cluster_L4/5 IT CTX	2.06344e-09	-0.402821	0.543	0.598	5.11732e-07	Fos
Cluster_L4/5 IT CTX	2.25145e-09	0.485353	0.464	0.388	5.58359e-07	Calb1
Cluster_L4/5 IT CTX	6.09433e-09	0.255596	0.608	0.505	1.51139e-06	Nell1
Cluster_L4/5 IT CTX	9.46458e-09	0.381226	0.287	0.211	2.34722e-06	Trpc4
Cluster_L4/5 IT CTX	1.06453e-08	0.299374	0.575	0.484	2.64002e-06	Syt2
Cluster_L4/5 IT CTX	3.19666e-06	0.329172	0.27	0.21	0.000792771	Shisa6
Cluster_L4/5 IT CTX	4.27988e-06	0.450808	0.28	0.224	0.00106141	Cbln4
Cluster_L4/5 IT CTX	4.40956e-06	0.272533	0.518	0.449	0.00109357	Thsd7a
Cluster_L4/5 IT CTX	0.000114045	0.28583	0.251	0.202	0.0282832	Sema3e
Cluster_L4/5 IT CTX	0.00348955	-0.378196	0.343	0.364	0.865408	Angpt1
Cluster_L5	6.28605e-11	-0.546231	0.673	0.692	1.55894e-08	Ntsr2
Cluster_L5	8.99826e-09	0.426351	0.464	0.339	2.23157e-06	Neto2
Cluster_L5	2.61492e-08	0.373589	0.586	0.46	6.485e-06	Bdnf
Cluster_L5	5.59905e-07	-0.254322	0.975	0.979	0.000138857	Arc
Cluster_L5	5.63514e-07	0.447643	0.275	0.183	0.000139751	Sncg
Cluster_L5	8.50943e-07	0.309286	0.618	0.507	0.000211034	Rxfp1
Cluster_L5	1.19633e-05	0.476971	0.277	0.203	0.00296691	Slc17a6
Cluster_L5	1.91151e-05	0.384274	0.444	0.358	0.00474053	Cpne4
Cluster_L5	0.000100711	0.300369	0.515	0.429	0.0249764	Tmem163
Cluster_L5	0.000771442	-0.301755	0.709	0.713	0.191318	Sdk2
Cluster_L5	0.000988019	0.296682	0.387	0.325	0.245029	Nr2f2
Cluster_L5	0.00498414	-0.279633	0.653	0.663	1	Col6a1
Cluster_L5	0.00735443	0.360462	0.427	0.372	1	Penk
Cluster_L5	0.0124849	0.416935	0.427	0.381	1	Lamp5
Cluster_L5	0.0176498	-0.326906	0.654	0.618	1	Cntn6
Cluster_L5	0.238787	-0.399855	0.321	0.325	1	Rprm
Cluster_L5	0.268997	-0.332666	0.395	0.39	1	Arhgap6
Cluster_L5	0.346328	-0.271864	0.288	0.296	1	Htr1f
Cluster_L5	0.38349	-0.374814	0.37	0.364	1	Gad2
Cluster_L5	0.495535	-0.281298	0.272	0.246	1	Siglech
Cluster_L5	0.51322	-0.313058	0.493	0.447	1	Gad1
Cluster_L5	0.615574	-0.36379	0.418	0.373	1	Fos
Cluster_L5	0.711761	-0.255844	0.361	0.348	1	Necab2
Cluster_L5 CTX	3.37536e-12	-0.420617	0.754	0.784	8.37089e-10	Ntsr2
Cluster_L5 CTX	6.73452e-12	0.414745	0.554	0.431	1.67016e-09	Vwc2l
Cluster_L5 CTX	2.48141e-09	0.441772	0.465	0.362	6.15389e-07	Nell1
Cluster_L5 CTX	7.7166e-08	0.333894	0.357	0.263	1.91372e-05	Necab1
Cluster_L5 CTX	2.99555e-07	0.307135	0.504	0.421	7.42895e-05	Epha4
Cluster_L5 CTX	1.0442e-06	0.308208	0.398	0.311	0.000258961	Kcnh5
Cluster_L5 CTX	1.06227e-05	0.268399	0.309	0.233	0.00263443	Prr16
Cluster_L5 CTX	7.42648e-05	0.302054	0.27	0.205	0.0184177	Gli3
Cluster_L5 CTX	0.000298821	0.315214	0.28	0.219	0.0741076	Neurod6
Cluster_L5 CTX	0.00156181	0.282463	0.644	0.578	0.387328	Igfbp5
Cluster_L5 CTX	0.00294177	-0.267115	0.462	0.489	0.729559	Vat1l
Cluster_L5 CTX	0.0121324	0.428007	0.273	0.241	1	Thsd7a
Cluster_L5 CTX	0.0665345	0.271206	0.352	0.322	1	Nrep
Cluster_L5 CTX	0.0895141	-0.252428	0.406	0.422	1	Sdk2
Cluster_L5 CTX	0.100405	-0.311001	0.332	0.344	1	Angpt1
Cluster_L5 CTX	0.11288	-0.269176	0.48	0.475	1	Plcxd3
Cluster_L5 CTX	0.152729	-0.35358	0.256	0.265	1	Fos
Cluster_L5 CTX	0.168524	-0.350579	0.257	0.27	1	Rab3b
Cluster_L5 CTX	0.17525	-0.302526	0.352	0.354	1	Pcsk5
Cluster_L5 NP/NP SUB	2.17343e-07	0.62332	0.716	0.508	5.39011e-05	Rnf152
Cluster_L5 NP/NP SUB	1.22145e-05	0.409126	0.818	0.659	0.0030292	Meis2
Cluster_L5 NP/NP SUB	2.30894e-05	0.923056	0.307	0.157	0.00572616	Sorcs3
Cluster_L5 NP/NP SUB	3.1867e-05	0.53755	0.666	0.485	0.00790303	Sema6a
Cluster_L5 NP/NP SUB	8.95428e-05	-0.797893	0.48	0.557	0.0222066	Cntnap4
Cluster_L5 NP/NP SUB	9.12329e-05	-0.28598	0.986	0.984	0.0226257	Nxph3
Cluster_L5 NP/NP SUB	0.000122163	-0.70876	0.446	0.554	0.0302965	Sntb1
Cluster_L5 NP/NP SUB	0.000156031	0.591975	0.554	0.377	0.0386957	Sema3e
Cluster_L5 NP/NP SUB	0.00032582	0.513252	0.446	0.289	0.0808033	Aqp4
Cluster_L5 NP/NP SUB	0.0008039	0.470471	0.527	0.37	0.199367	Necab1
Cluster_L5 NP/NP SUB	0.00103919	0.254788	0.841	0.679	0.257718	Plcxd2
Cluster_L5 NP/NP SUB	0.00120803	0.259413	0.916	0.862	0.29959	Dkk3
Cluster_L5 NP/NP SUB	0.00125433	0.603449	0.253	0.141	0.311074	Syt6
Cluster_L5 NP/NP SUB	0.00125594	-0.592558	0.649	0.682	0.311472	Cabp7
Cluster_L5 NP/NP SUB	0.00289489	0.422761	0.382	0.256	0.717932	Col6a1
Cluster_L5 NP/NP SUB	0.00307429	0.279964	0.584	0.42	0.762424	Hpcal1
Cluster_L5 NP/NP SUB	0.00471454	0.439078	0.338	0.22	1	Unc13c
Cluster_L5 NP/NP SUB	0.00613856	-0.64297	0.378	0.446	1	Sema5b
Cluster_L5 NP/NP SUB	0.00771623	0.445185	0.375	0.269	1	Lamp5
Cluster_L5 NP/NP SUB	0.00851155	0.292195	0.47	0.341	1	Kctd12
Cluster_L5 NP/NP SUB	0.017914	0.451412	0.314	0.22	1	Cdh6
Cluster_L5 NP/NP SUB	0.0218314	0.312691	0.324	0.233	1	Pkib
Cluster_L5 NP/NP SUB	0.0258712	0.344466	0.334	0.243	1	Cpne8
Cluster_L5 NP/NP SUB	0.0303404	0.297988	0.615	0.518	1	Rprm
Cluster_L5 NP/NP SUB	0.0339141	0.263842	0.311	0.22	1	Vat1l
Cluster_L5 NP/NP SUB	0.0366686	-0.371908	0.655	0.662	1	Stard5
Cluster_L5 NP/NP SUB	0.0417212	-0.542507	0.348	0.39	1	Mapk4
Cluster_L5 NP/NP SUB	0.0569813	-0.556375	0.236	0.289	1	Shisa6
Cluster_L5 NP/NP SUB	0.058937	-0.444618	0.324	0.37	1	Id2
Cluster_L5 NP/NP SUB	0.100694	-0.277676	0.426	0.456	1	Rmst
Cluster_L5 NP/NP SUB	0.120955	-0.283415	0.709	0.672	1	Prr16
Cluster_L5 NP/NP SUB	0.123092	-0.937161	0.25	0.279	1	Prss35
Cluster_L5 NP/NP SUB	0.135287	-0.504773	0.284	0.321	1	Gsg1l
Cluster_L5 NP/NP SUB	0.191552	-0.466099	0.368	0.39	1	Fhod3
Cluster_L5 NP/NP SUB	0.413332	-0.340233	0.267	0.272	1	Fos
Cluster_L5 NP/NP SUB	0.434936	-0.26281	0.253	0.21	1	Slc39a12
Cluster_L5 NP/NP SUB	0.472057	-0.254649	0.318	0.321	1	Cdh9
Cluster_L5 NP/NP SUB	0.508778	-0.437787	0.331	0.266	1	Sdk2
Cluster_L5 NP/NP SUB	0.518724	-0.303394	0.253	0.266	1	Tanc1
Cluster_L5 NP/NP SUB	0.552085	-0.363259	0.338	0.338	1	Cux2
Cluster_L5 NP/NP SUB	0.703842	-0.28456	0.389	0.361	1	Rorb
Cluster_L5 PPP	7.32282e-06	-0.451641	0.974	0.984	0.00181606	Arc
Cluster_L5 PPP	3.65519e-05	0.53159	0.896	0.833	0.00906486	Fn1
Cluster_L5 PPP	0.000218528	0.531787	0.571	0.317	0.0541949	Gad2
Cluster_L5 PPP	0.000535575	1.29766	0.286	0.113	0.132823	Vip
Cluster_L5 PPP	0.000820252	-0.567642	0.779	0.86	0.203422	Dpy19l1
Cluster_L5 PPP	0.00181324	-0.585809	0.649	0.79	0.449683	Ntsr2
Cluster_L5 PPP	0.00499075	0.758173	0.584	0.462	1	Gad1
Cluster_L5 PPP	0.00745854	-0.617611	0.571	0.694	1	Id2
Cluster_L5 PPP	0.0119789	-0.554871	0.519	0.672	1	Pcsk5
Cluster_L5 PPP	0.0127398	-0.294549	0.883	0.952	1	Cpne6
Cluster_L5 PPP	0.0170049	-0.306104	0.948	0.935	1	Syt2
Cluster_L5 PPP	0.0257922	-0.420851	0.649	0.763	1	Pou3f1
Cluster_L5 PPP	0.0296081	0.568965	0.597	0.511	1	Pvalb
Cluster_L5 PPP	0.0390199	-0.574683	0.481	0.581	1	Sdk2
Cluster_L5 PPP	0.044707	1.1651	0.286	0.177	1	Nell1
Cluster_L5 PPP	0.0456371	-0.474188	0.519	0.624	1	Nxph3
Cluster_L5 PPP	0.0466737	0.256739	0.909	0.892	1	Arhgap12
Cluster_L5 PPP	0.0514258	1.225	0.299	0.194	1	Sema6a
Cluster_L5 PPP	0.0604299	-0.669293	0.364	0.452	1	Hs3st2
Cluster_L5 PPP	0.0648866	-0.342195	0.688	0.774	1	Sema3e
Cluster_L5 PPP	0.068972	-0.421701	0.597	0.667	1	Cntn6
Cluster_L5 PPP	0.0702401	-0.783614	0.273	0.371	1	Gucy1a1
Cluster_L5 PPP	0.0817068	-0.638809	0.299	0.403	1	Cntnap5b
Cluster_L5 PPP	0.100554	-0.36541	0.584	0.667	1	Bcl11b
Cluster_L5 PPP	0.103076	0.418806	0.26	0.161	1	Cntnap4
Cluster_L5 PPP	0.108949	-0.493973	0.234	0.323	1	Arhgap6
Cluster_L5 PPP	0.119551	0.688412	0.26	0.167	1	Pkib
Cluster_L5 PPP	0.12009	0.449302	0.364	0.269	1	Cpne4
Cluster_L5 PPP	0.126925	-0.49982	0.286	0.398	1	Rnf152
Cluster_L5 PPP	0.15378	0.354156	0.597	0.5	1	Chrm2
Cluster_L5 PPP	0.15609	-0.444919	0.247	0.333	1	Meis2
Cluster_L5 PPP	0.15908	-0.467533	0.636	0.683	1	Lyz2
Cluster_L5 PPP	0.184719	0.406195	0.571	0.473	1	Cobll1
Cluster_L5 PPP	0.214324	-0.445381	0.286	0.36	1	Tle4
Cluster_L5 PPP	0.231565	0.310328	0.688	0.677	1	Shisa6
Cluster_L5 PPP	0.236437	-0.268111	0.701	0.742	1	Rspo2
Cluster_L5 PPP	0.241434	0.61553	0.571	0.516	1	Cacna2d2
Cluster_L5 PPP	0.270763	-0.525589	0.273	0.344	1	Plcxd3
Cluster_L5 PPP	0.306351	0.348858	0.351	0.29	1	Slit2
Cluster_L5 PPP	0.324028	-0.387	0.208	0.269	1	Adamts2
Cluster_L5 PPP	0.329548	0.57992	0.286	0.242	1	Gli3
Cluster_L5 PPP	0.345693	-0.766104	0.208	0.258	1	Kcnmb2
Cluster_L5 PPP	0.361536	-0.347579	0.571	0.575	1	Pde11a
Cluster_L5 PPP	0.383495	-0.33044	0.338	0.398	1	Galnt14
Cluster_L5 PPP	0.435022	0.288161	0.26	0.21	1	Rims3
Cluster_L5 PPP	0.709276	-0.317759	0.325	0.312	1	Sox11
Cluster_L5 PPP	0.819702	0.268086	0.273	0.263	1	Kctd12
Cluster_L6 CT CTX	3.36374e-49	0.483145	0.721	0.476	8.34206e-47	Tle4
Cluster_L6 CT CTX	4.5282e-46	-0.536154	0.949	0.935	1.12299e-43	Arc
Cluster_L6 CT CTX	5.74344e-34	0.465475	0.613	0.413	1.42437e-31	Foxp2
Cluster_L6 CT CTX	1.95586e-29	0.355007	0.502	0.312	4.85054e-27	Trbc2
Cluster_L6 CT CTX	2.87378e-29	0.36105	0.509	0.326	7.12698e-27	Syt6
Cluster_L6 CT CTX	3.77322e-27	0.274548	0.423	0.253	9.35758e-25	Hat1
Cluster_L6 CT CTX	3.52354e-24	0.316386	0.43	0.269	8.73837e-22	Zfpm2
Cluster_L6 CT CTX	1.91747e-23	0.272172	0.637	0.454	4.75532e-21	Gng12
Cluster_L6 CT CTX	1.85222e-20	0.340448	0.77	0.639	4.59351e-18	Meis2
Cluster_L6 CT CTX	4.19714e-20	-0.842476	0.556	0.585	1.04089e-17	Ntsr2
Cluster_L6 CT CTX	1.02911e-19	0.315326	0.503	0.341	2.55219e-17	Gsg1l
Cluster_L6 CT CTX	1.98718e-18	0.310611	0.348	0.216	4.9282e-16	Epha4
Cluster_L6 CT CTX	4.95888e-17	0.306208	0.752	0.639	1.2298e-14	Igfbp4
Cluster_L6 CT CTX	1.14635e-14	0.294843	0.698	0.586	2.84294e-12	Rprm
Cluster_L6 CT CTX	4.00489e-05	0.342787	0.322	0.265	0.00993213	Cplx3
Cluster_L6 CT CTX	0.000754652	-0.328604	0.253	0.199	0.187154	Mapk4
Cluster_L6 CT CTX	0.00302391	-0.265388	0.455	0.373	0.74993	Cdh9
Cluster_L6 CT CTX	0.0317452	-0.304198	0.311	0.262	1	Rxfp1
Cluster_L6 CT CTX	0.098887	-0.305982	0.252	0.22	1	Cux2
Cluster_L6 CT CTX	0.106222	-0.407468	0.3	0.256	1	Arhgap6
Cluster_L6 CT CTX	0.17849	-0.488829	0.266	0.231	1	Tox
Cluster_L6 CT CTX	0.404034	-0.428506	0.592	0.515	1	Cntn6
Cluster_L6 CT CTX	0.462147	-0.388422	0.294	0.267	1	Gad2
Cluster_L6 CT CTX	0.486399	-0.42039	0.403	0.356	1	Gad1
Cluster_L6 CT CTX	0.577455	-0.347409	0.564	0.478	1	Lyz2
Cluster_L6 CT CTX	0.605296	-0.539966	0.286	0.271	1	Fos
Cluster_L6 CT CTX	0.85945	-0.479617	0.267	0.254	1	Angpt1
Cluster_Lamp5+ IN	1.30338e-65	-0.519812	0.972	0.975	3.23239e-63	Arc
Cluster_Lamp5+ IN	4.88973e-17	0.273211	0.851	0.737	1.21265e-14	Ppp1r1b
Cluster_Lamp5+ IN	2.17036e-14	0.312087	0.493	0.374	5.38248e-12	Prdm8
Cluster_Lamp5+ IN	2.12498e-12	-0.365009	0.775	0.743	5.26995e-10	Ntsr2
Cluster_Lamp5+ IN	6.09259e-11	0.334698	0.498	0.391	1.51096e-08	Syt2
Cluster_Lamp5+ IN	1.0382e-09	0.292305	0.358	0.269	2.57473e-07	Gfra2
Cluster_Lamp5+ IN	1.17927e-08	-0.599461	0.304	0.361	2.9246e-06	Fos
Cluster_Lamp5+ IN	2.48042e-06	0.332975	0.553	0.482	0.000615144	Penk
Cluster_Lamp5+ IN	0.076922	-0.371156	0.288	0.294	1	Pcsk5
Cluster_Macrophages	2.46891e-08	0.501591	0.289	0.212	6.1229e-06	Cobll1
Cluster_Macrophages	2.81968e-05	0.283856	0.357	0.293	0.0069928	Sipa1l3
Cluster_Macrophages	8.92268e-06	0.282552	0.262	0.199	0.00221282	Cd300c2
Cluster_Macrophages	1.68565e-05	0.273114	0.533	0.465	0.00418041	Cd68
Cluster_Macrophages	4.16426e-12	-0.391586	0.661	0.714	1.03274e-09	Ntsr2
Cluster_Macrophages	0.000607342	-0.262221	0.591	0.613	0.150621	Igfbp5
Cluster_Macrophages	0.00257508	0.256007	0.297	0.251	0.63862	Rorb
Cluster_Macrophages	0.0456902	-0.312167	0.276	0.293	1	Mapk4
Cluster_Oligodendrocytes	4.78042e-19	-0.466294	0.451	0.51	1.18555e-16	Bhlhe40
Cluster_Oligodendrocytes	6.28506e-18	0.343861	0.477	0.402	1.55869e-15	Prox1
Cluster_Oligodendrocytes	1.19316e-17	-0.410148	0.294	0.366	2.95905e-15	Ntsr2
Cluster_Oligodendrocytes	6.21592e-16	-0.294306	0.604	0.653	1.54155e-13	Chrm2
Cluster_Oligodendrocytes	4.05435e-15	0.319403	0.477	0.405	1.00548e-12	Dpy19l1
Cluster_Oligodendrocytes	8.84112e-13	-0.266174	0.641	0.657	2.1926e-10	Vwc2l
Cluster_Oligodendrocytes	2.38039e-10	-0.41117	0.22	0.273	5.90336e-08	Carmn
Cluster_Oligodendrocytes	1.23891e-07	0.294998	0.357	0.314	3.0725e-05	Acsbg1
Cluster_Oligodendrocytes	1.29122e-05	0.276641	0.257	0.222	0.00320223	Angpt1
Cluster_OPCs	2.13299e-19	-0.460719	0.637	0.728	5.28981e-17	Ntsr2
Cluster_OPCs	1.25897e-06	-0.311668	0.482	0.546	0.000312224	Rims3
Cluster_OPCs	1.36411e-06	0.281484	0.553	0.482	0.0003383	Meis2
Cluster_OPCs	0.000202947	-0.258048	0.336	0.394	0.050331	Rmst
Cluster_OPCs	0.00498515	0.303924	0.276	0.241	1	Sox11
Cluster_OPCs	0.0342692	-0.258457	0.387	0.409	1	Unc13c
Cluster_Pericytes	8.62139e-09	0.311281	0.553	0.453	2.1381e-06	Pdzd2
Cluster_Pericytes	5.25643e-08	0.320142	0.308	0.225	1.3036e-05	Adgrl4
Cluster_Pericytes	4.07767e-06	0.261429	0.51	0.434	0.00101126	Dkk3
Cluster_Pericytes	2.35042e-05	-0.336128	0.547	0.58	0.00582905	Acta2
Cluster_Pericytes	7.54215e-05	0.282641	0.336	0.269	0.0187045	Slc17a7
Cluster_Pericytes	0.000369557	-0.33324	0.535	0.557	0.0916502	Ntsr2
Cluster_Pericytes	0.0180882	-0.292942	0.593	0.604	1	Igfbp5
Cluster_Pericytes	0.0265779	-0.354355	0.326	0.344	1	Kctd12
Cluster_Pericytes	0.037089	0.252407	0.299	0.268	1	Gad1
Cluster_Pvalb+ IN	7.84264e-76	-0.754876	0.708	0.822	1.94497e-73	Vat1l
Cluster_Pvalb+ IN	4.58906e-67	0.285186	0.985	0.973	1.13809e-64	Gad2
Cluster_Pvalb+ IN	1.64127e-64	0.780917	0.724	0.553	4.07036e-62	Syt2
Cluster_Pvalb+ IN	1.70544e-62	-1.38643	0.233	0.419	4.22948e-60	Calb1
Cluster_Pvalb+ IN	6.76665e-61	0.849023	0.558	0.358	1.67813e-58	Pvalb
Cluster_Pvalb+ IN	4.20812e-60	-0.833203	0.533	0.683	1.04361e-57	Ntsr2
Cluster_Pvalb+ IN	2.75286e-51	0.692144	0.684	0.511	6.82708e-49	Cabp7
Cluster_Pvalb+ IN	8.48753e-49	0.534536	0.825	0.688	2.10491e-46	Chrm2
Cluster_Pvalb+ IN	1.06689e-41	-1.01255	0.238	0.388	2.64588e-39	Rab3b
Cluster_Pvalb+ IN	7.16599e-41	-0.366058	0.888	0.926	1.77717e-38	Dner
Cluster_Pvalb+ IN	1.12236e-40	-1.00654	0.35	0.476	2.78346e-38	Wfs1
Cluster_Pvalb+ IN	5.15551e-38	-1.45392	0.168	0.295	1.27857e-35	Prox1
Cluster_Pvalb+ IN	1.52799e-36	-0.676909	0.294	0.453	3.78942e-34	Dkk3
Cluster_Pvalb+ IN	6.98091e-32	-0.569697	0.621	0.721	1.73127e-29	Hpcal1
Cluster_Pvalb+ IN	1.49491e-28	-0.488543	0.57	0.678	3.70737e-26	Necab2
Cluster_Pvalb+ IN	3.96284e-28	0.507726	0.592	0.468	9.82784e-26	Nrep
Cluster_Pvalb+ IN	6.11701e-28	-0.711064	0.462	0.559	1.51702e-25	Tmem255a
Cluster_Pvalb+ IN	1.39473e-25	0.669877	0.331	0.212	3.45892e-23	Hapln1
Cluster_Pvalb+ IN	2.92868e-23	-0.490849	0.46	0.562	7.26314e-21	Cpne6
Cluster_Pvalb+ IN	3.78336e-23	-0.258516	0.851	0.895	9.38273e-21	Rims3
Cluster_Pvalb+ IN	1.08447e-22	-0.529724	0.612	0.678	2.68949e-20	Grik3
Cluster_Pvalb+ IN	5.14268e-22	0.363903	0.688	0.573	1.27538e-19	Plcxd2
Cluster_Pvalb+ IN	4.3614e-20	-0.75626	0.233	0.326	1.08163e-17	Sox11
Cluster_Pvalb+ IN	6.70277e-20	-0.646941	0.373	0.458	1.66229e-17	Arhgap6
Cluster_Pvalb+ IN	6.74536e-20	-0.346926	0.725	0.785	1.67285e-17	Rasgrf2
Cluster_Pvalb+ IN	9.0297e-18	-0.735536	0.465	0.535	2.23936e-15	Parm1
Cluster_Pvalb+ IN	7.41605e-17	-0.647584	0.352	0.428	1.83918e-14	Cdh4
Cluster_Pvalb+ IN	6.17698e-16	0.385313	0.444	0.343	1.53189e-13	Myo16
Cluster_Pvalb+ IN	7.56044e-16	0.599862	0.352	0.263	1.87499e-13	Meis2
Cluster_Pvalb+ IN	2.2024e-15	-0.728044	0.187	0.267	5.46195e-13	Tox
Cluster_Pvalb+ IN	2.84663e-13	0.284819	0.803	0.749	7.05965e-11	Acsbg1
Cluster_Pvalb+ IN	4.12687e-13	-0.375196	0.546	0.596	1.02346e-10	Lyz2
Cluster_Pvalb+ IN	1.1984e-12	0.262506	0.542	0.439	2.97203e-10	Rnf152
Cluster_Pvalb+ IN	7.06489e-12	-0.32648	0.478	0.542	1.75209e-09	Clmn
Cluster_Pvalb+ IN	1.63839e-11	-0.466809	0.273	0.347	4.06321e-09	Syt17
Cluster_Pvalb+ IN	2.06814e-11	0.850964	0.275	0.211	5.12898e-09	Gfap
Cluster_Pvalb+ IN	2.03259e-10	0.301526	0.622	0.531	5.04083e-08	Vwc2l
Cluster_Pvalb+ IN	5.43558e-10	-0.570514	0.331	0.39	1.34803e-07	Sdk2
Cluster_Pvalb+ IN	5.78564e-10	0.385594	0.254	0.184	1.43484e-07	Sema5b
Cluster_Pvalb+ IN	1.33397e-09	0.337684	0.513	0.436	3.30826e-07	Gucy1a1
Cluster_Pvalb+ IN	1.9722e-09	0.333914	0.437	0.365	4.89106e-07	Plch1
Cluster_Pvalb+ IN	4.02277e-09	-0.448244	0.234	0.296	9.97647e-07	Galnt14
Cluster_Pvalb+ IN	7.08068e-08	0.439628	0.344	0.279	1.75601e-05	Ppp1r1b
Cluster_Pvalb+ IN	5.31608e-07	-0.435227	0.215	0.262	0.000131839	2010300C02Rik
Cluster_Pvalb+ IN	6.32007e-07	0.368608	0.379	0.316	0.000156738	Cdh20
Cluster_Pvalb+ IN	7.31924e-07	-0.442616	0.236	0.289	0.000181517	Tmem163
Cluster_Pvalb+ IN	1.79878e-06	-0.288722	0.535	0.567	0.000446098	Cdh13
Cluster_Pvalb+ IN	1.91668e-06	0.279507	0.412	0.354	0.000475335	Pdzd2
Cluster_Pvalb+ IN	1.13774e-05	-0.273497	0.525	0.547	0.00282159	Pip5k1b
Cluster_Pvalb+ IN	0.000107488	-0.301873	0.49	0.514	0.0266571	Kctd12
Cluster_Pvalb+ IN	0.000307418	-0.450818	0.251	0.281	0.0762397	Rorb
Cluster_Pvalb+ IN	0.00189097	-0.443924	0.332	0.356	0.468961	Arc
Cluster_Pvalb+ IN	0.00249736	-0.324717	0.283	0.307	0.619346	Cdh9
Cluster_Pvalb+ IN	0.122592	0.342898	0.385	0.377	1	Penk
Cluster_Sst+ IN	8.86616e-17	-0.535002	0.662	0.711	2.19881e-14	Ntsr2
Cluster_Sst+ IN	8.17651e-12	-0.530422	0.818	0.846	2.02777e-09	Arc
Cluster_Sst+ IN	3.65736e-10	0.328053	0.75	0.643	9.07026e-08	Cdh13
Cluster_Sst+ IN	1.72716e-07	0.273302	0.542	0.433	4.28337e-05	Cabp7
Cluster_Sst+ IN	8.95013e-07	0.329212	0.295	0.213	0.000221963	Rorb
Cluster_Sst+ IN	0.00015918	0.293155	0.348	0.281	0.0394766	Nr2f2
Cluster_Sst+ IN	0.00141584	0.283651	0.403	0.342	0.351128	Shisa6
Cluster_Sst+ IN	0.0751085	-0.2676	0.599	0.574	1	Cux2
Cluster_Sst+ IN	0.0764858	-0.280862	0.853	0.805	1	Dkk3
Cluster_Sst+ IN	0.10445	-0.335896	0.402	0.4	1	2010300C02Rik
Cluster_Sst+ IN	0.20271	-0.252998	0.281	0.295	1	Calb2
Cluster_Sst+ IN	0.310878	-0.496298	0.25	0.252	1	Sdk2
Cluster_Sst+ IN	0.374052	-0.417784	0.307	0.307	1	Mapk4
Cluster_Sst+ IN	0.967375	-0.308463	0.272	0.261	1	Igsf21
Cluster_VIP Interneurons	2.67176e-08	-0.412114	0.66	0.708	6.62596e-06	Ntsr2
Cluster_VIP Interneurons	1.00871e-06	0.370686	0.494	0.389	0.000250161	Igfbp4
Cluster_VIP Interneurons	0.000395207	-0.295407	0.774	0.786	0.0980114	Arc
Cluster_VIP Interneurons	0.00106953	-0.435584	0.293	0.345	0.265244	Rmst
Cluster_VIP Interneurons	0.00520242	0.290783	0.486	0.426	1	Cabp7
Cluster_VIP Interneurons	0.00579857	0.26984	0.402	0.341	1	Cdh4
Cluster_VIP Interneurons	0.00910946	-0.390447	0.433	0.456	1	Mapk4
Cluster_VIP Interneurons	0.203111	-0.263095	0.353	0.365	1	Gucy1a1
Cluster_VIP Interneurons	0.395297	-0.366222	0.248	0.256	1	Unc13c
Cluster_VIP Interneurons	0.462644	-0.262801	0.687	0.657	1	Igfbp5
Cluster_VIP Interneurons	0.552801	-0.301349	0.431	0.42	1	Angpt1
Cluster_VIP Interneurons	0.62352	-0.305908	0.274	0.279	1	Pdgfra
Cluster_VIP Interneurons	0.684895	-0.258867	0.265	0.25	1	Fhod3
Cluster_VLMC	3.90682e-19	-0.445234	0.756	0.809	9.68891e-17	Igfbp5
Cluster_VLMC	2.80662e-16	0.290888	0.855	0.787	6.96042e-14	Igf2
Cluster_VLMC	1.99316e-13	0.296238	0.812	0.726	4.94304e-11	Aldh1a2
Cluster_VLMC	1.13909e-12	0.437346	0.55	0.457	2.82494e-10	Gjb2
Cluster_VLMC	1.67834e-12	0.34781	0.737	0.69	4.16228e-10	Fn1
Cluster_VLMC	2.45096e-11	0.333802	0.635	0.547	6.07837e-09	Fmod
Cluster_VLMC	2.57204e-11	0.320211	0.78	0.729	6.37866e-09	Col1a1
Cluster_VLMC	7.44454e-06	-0.614873	0.205	0.25	0.00184625	Rmst
Cluster_VLMC	1.69893e-05	0.437353	0.322	0.269	0.00421335	Ly6a
Cluster_VLMC	4.01113e-05	0.34909	0.251	0.202	0.00994761	Cd93
Cluster_VLMC	6.43356e-05	0.326916	0.415	0.365	0.0159552	Sema6a
Cluster_VLMC	0.000149759	-0.28036	0.448	0.49	0.0371403	Ccn2
Cluster_VLMC	0.000232564	0.364365	0.302	0.258	0.0576758	Slfn5
Cluster_VLMC	0.00137636	-0.303773	0.278	0.314	0.341338	Dner
Cluster_VLMC	0.00246777	-0.395237	0.263	0.293	0.612008	Vwc2l
Cluster_VLMC	0.00573307	-0.391666	0.241	0.27	1	Arc

## Sheet: PBS vs 500 nm
Cluster	p_val	avg_log2FC	pct.1	pct.2	p_val_adj	gene
Cluster_Astrocytes	7.93e-60	-0.452144	0.535	0.65	1.97e-57	Mapk4
Cluster_Astrocytes	1.39e-59	0.533272	0.575	0.465	3.44e-57	Lyz2
Cluster_Astrocytes	4.1e-58	-0.401997	0.678	0.754	1.02e-55	Slc39a12
Cluster_Astrocytes	1.44e-53	0.56973	0.508	0.399	3.56e-51	Grik3
Cluster_Astrocytes	1.74e-48	0.697504	0.332	0.228	4.31e-46	Arhgap6
Cluster_Astrocytes	3.07e-48	0.541307	0.507	0.411	7.62e-46	Cntn6
Cluster_Astrocytes	4.31e-34	-0.35447	0.498	0.59	1.07e-31	Gfap
Cluster_Astrocytes	1.32e-24	-0.491532	0.464	0.532	3.27e-22	Cabp7
Cluster_Astrocytes	1.58e-17	-0.35606	0.433	0.495	3.91e-15	Gad1
Cluster_Astrocytes	2.36e-17	-0.454571	0.228	0.289	5.84e-15	Pvalb
Cluster_Astrocytes	2.46e-17	0.35894	0.393	0.332	6.1e-15	Angpt1
Cluster_Astrocytes	5.23e-13	0.331036	0.255	0.203	1.3e-10	Kcnh5
Cluster_Astrocytes	8.4e-13	-0.337339	0.312	0.364	2.08e-10	Kctd12
Cluster_Astrocytes	4.74e-09	0.303617	0.372	0.335	1.17e-06	Hpcal1
Cluster_Astrocytes	1.18e-07	-0.363734	0.484	0.515	2.92e-05	Arc
Cluster_Astrocytes	1.86e-06	0.310416	0.253	0.222	0.00046251	Pip5k1b
Cluster_Astrocytes	9.6e-06	0.268299	0.275	0.244	0.00238116	Cobll1
Cluster_Astrocytes	0.0321647	0.258599	0.263	0.251	1	Calb2
Cluster_CA1/CA3/ProS	4.78e-31	-0.334648	0.969	0.983	1.19e-28	Epha4
Cluster_CA1/CA3/ProS	7.28e-19	0.720584	0.574	0.434	1.81e-16	Cntn6
Cluster_CA1/CA3/ProS	9.26e-19	0.983604	0.449	0.298	2.3e-16	Grik3
Cluster_CA1/CA3/ProS	3.57e-17	-0.295391	0.926	0.954	8.84e-15	Sipa1l3
Cluster_CA1/CA3/ProS	4.55e-17	-0.308289	0.897	0.931	1.13e-14	Kctd12
Cluster_CA1/CA3/ProS	4.81e-16	-0.298336	0.949	0.954	1.19e-13	2010300C02Rik
Cluster_CA1/CA3/ProS	1.58e-15	0.987965	0.342	0.2	3.91e-13	Angpt1
Cluster_CA1/CA3/ProS	7.61e-12	0.860156	0.348	0.228	1.89e-09	Arhgap6
Cluster_CA1/CA3/ProS	9.72e-12	-0.284855	0.871	0.928	2.41e-09	Wfs1
Cluster_CA1/CA3/ProS	9.8e-12	0.902491	0.281	0.166	2.43e-09	Cux2
Cluster_CA1/CA3/ProS	2.92e-11	0.473089	0.563	0.453	7.25e-09	Lyz2
Cluster_CA1/CA3/ProS	3.48e-09	0.554033	0.413	0.311	8.62e-07	Chrm2
Cluster_CA1/CA3/ProS	6.73e-08	-0.36781	0.569	0.648	1.67e-05	Mapk4
Cluster_CA1/CA3/ProS	4.05e-07	0.318949	0.828	0.781	0.00010048	Penk
Cluster_CA1/CA3/ProS	9.23e-06	-0.413729	0.309	0.391	0.00229012	Lamp5
Cluster_CA1/CA3/ProS	1.5e-05	0.560389	0.318	0.248	0.00372865	Pde11a
Cluster_CA1/CA3/ProS	6.29e-05	-0.258723	0.659	0.722	0.0156094	Arhgef28
Cluster_CA1/CA3/ProS	0.00012594	0.619651	0.283	0.219	0.0312342	Plch1
Cluster_CA1/CA3/ProS	0.00031457	-0.281321	0.589	0.643	0.0780128	Calb1
Cluster_CA1/CA3/ProS	0.00186862	0.321312	0.341	0.292	0.463418	Rasl10a
Cluster_CA1/CA3/ProS	0.00435385	0.476261	0.268	0.224	1	Hpcal1
Cluster_CA1/CA3/ProS	0.0108198	-0.298692	0.524	0.556	1	Ndst4
Cluster_CA1/CA3/ProS	0.0140806	0.291765	0.292	0.251	1	Kcnh5
Cluster_CA1/CA3/ProS	0.0184872	0.273885	0.312	0.274	1	Fezf2
Cluster_CA1/CA3/ProS	0.0451824	0.347886	0.288	0.26	1	Gng12
Cluster_CA1/CA3/ProS	0.0894813	0.286856	0.26	0.238	1	Myo16
Cluster_CA1/CA3/ProS	0.251872	0.28727	0.277	0.267	1	Cd24a
Cluster_CA1/CA3/ProS	0.319208	0.259387	0.304	0.297	1	Gad1
Cluster_CA3	4.85e-79	0.548618	0.973	0.961	1.2e-76	Dkk3
Cluster_CA3	2.63e-65	-1.90528	0.442	0.662	6.51e-63	Nr2f2
Cluster_CA3	2.77e-52	0.541043	0.953	0.833	6.87e-50	Neurod6
Cluster_CA3	4.18e-52	0.329348	0.986	0.985	1.04e-49	Cpne6
Cluster_CA3	5.85e-42	-1.68193	0.362	0.55	1.45e-39	Col6a1
Cluster_CA3	4.03e-37	0.383557	0.952	0.91	9.99e-35	Shisa6
Cluster_CA3	5.14e-37	-1.65127	0.254	0.458	1.28e-34	Tmem255a
Cluster_CA3	1.29e-34	0.433418	0.939	0.884	3.19e-32	Nrn1
Cluster_CA3	3.49e-29	-0.809683	0.21	0.407	8.66e-27	Calb2
Cluster_CA3	1.23e-28	-0.393443	0.769	0.862	3.05e-26	2010300C02Rik
Cluster_CA3	1.58e-26	-0.524774	0.813	0.854	3.91e-24	Nell1
Cluster_CA3	3.3e-26	0.434172	0.881	0.763	8.19e-24	Prdm8
Cluster_CA3	1.27e-25	-0.727554	0.633	0.753	3.16e-23	Plcxd3
Cluster_CA3	3.63e-24	-1.27482	0.274	0.434	9e-22	Pdzd2
Cluster_CA3	2.56e-22	-0.920314	0.44	0.583	6.35e-20	Thsd7a
Cluster_CA3	4.88e-20	-1.1753	0.127	0.269	1.21e-17	Rprm
Cluster_CA3	5.73e-20	0.784245	0.377	0.217	1.42e-17	Lamp5
Cluster_CA3	2.97e-19	-0.615202	0.558	0.677	7.36e-17	Rasgrf2
Cluster_CA3	5.47e-19	0.325561	0.883	0.777	1.36e-16	Tanc1
Cluster_CA3	1.63e-17	0.476764	0.696	0.527	4.03e-15	Prss35
Cluster_CA3	2.14e-17	0.537766	0.611	0.452	5.31e-15	Syt2
Cluster_CA3	2.7e-17	0.570074	0.533	0.365	6.69e-15	Strip2
Cluster_CA3	5.09e-17	-0.84051	0.447	0.57	1.26e-14	Gad1
Cluster_CA3	1.82e-16	0.315647	0.881	0.749	4.5e-14	Arc
Cluster_CA3	2.43e-16	-0.302896	0.906	0.932	6.03e-14	Kctd12
Cluster_CA3	2.84e-15	-0.986259	0.222	0.349	7.03e-13	Cntnap4
Cluster_CA3	1.81e-14	-0.307696	0.788	0.907	4.48e-12	Necab2
Cluster_CA3	2.89e-14	-0.466574	0.718	0.767	7.16e-12	Trpc4
Cluster_CA3	5.42e-14	0.583655	0.414	0.274	1.34e-11	Kcnh5
Cluster_CA3	1.24e-13	-0.750198	0.467	0.553	3.08e-11	Syt17
Cluster_CA3	3.59e-13	-0.743829	0.394	0.496	8.9e-11	Sema6a
Cluster_CA3	1.3e-12	0.561063	0.455	0.321	3.23e-10	Pcsk5
Cluster_CA3	1.82e-12	-1.00308	0.153	0.262	4.52e-10	Rab3b
Cluster_CA3	2.19e-12	0.647494	0.435	0.302	5.43e-10	Angpt1
Cluster_CA3	2.75e-12	0.420485	0.523	0.383	6.81e-10	Mdga1
Cluster_CA3	5.11e-12	-0.541354	0.699	0.743	1.27e-09	Sorcs3
Cluster_CA3	1.34e-11	0.312259	0.895	0.877	3.32e-09	Cdh9
Cluster_CA3	2.56e-11	0.600145	0.334	0.22	6.36e-09	Htr1f
Cluster_CA3	2.6e-11	0.80414	0.323	0.214	6.45e-09	Rasl10a
Cluster_CA3	3.03e-11	0.549909	0.49	0.369	7.53e-09	Gm2115
Cluster_CA3	3.11e-11	-0.875754	0.153	0.256	7.7e-09	Mapk4
Cluster_CA3	4.36e-10	0.381944	0.706	0.609	1.08e-07	Meis2
Cluster_CA3	1.22e-09	0.483724	0.451	0.331	3.02e-07	Vwc2l
Cluster_CA3	2.28e-09	-0.798805	0.178	0.271	5.64e-07	Rims3
Cluster_CA3	2.95e-09	0.359291	0.343	0.232	7.31e-07	Cux2
Cluster_CA3	4.01e-09	-0.979483	0.211	0.295	9.94e-07	Tmem163
Cluster_CA3	1.17e-08	0.592429	0.304	0.21	2.9e-06	Sema3d
Cluster_CA3	2.53e-08	-0.557478	0.386	0.46	6.27e-06	Dpyd
Cluster_CA3	2.79e-08	-0.504699	0.325	0.421	6.91e-06	Gad2
Cluster_CA3	3.78e-08	-0.582037	0.199	0.29	9.38e-06	Slc39a12
Cluster_CA3	5.44e-08	-0.56045	0.328	0.411	1.35e-05	Zfpm2
Cluster_CA3	1.16e-07	-0.451569	0.573	0.636	2.88e-05	Parm1
Cluster_CA3	1.45e-07	0.296862	0.653	0.546	3.61e-05	Npy2r
Cluster_CA3	3.98e-07	0.422631	0.34	0.246	9.87e-05	Sncg
Cluster_CA3	4.33e-07	0.256097	0.668	0.564	0.00010748	Neto2
Cluster_CA3	2.86e-06	-0.388464	0.624	0.66	0.00070828	Nrp2
Cluster_CA3	4.42e-06	-0.381228	0.25	0.32	0.00109509	Igfbp4
Cluster_CA3	1.12e-05	-0.518232	0.407	0.472	0.00277462	Cdh13
Cluster_CA3	1.18e-05	-0.568107	0.324	0.381	0.00291527	Wfs1
Cluster_CA3	1.27e-05	0.277279	0.523	0.43	0.00313723	Chrm2
Cluster_CA3	1.97e-05	-0.823467	0.195	0.258	0.00487403	Gfap
Cluster_CA3	4.71e-05	-0.344412	0.262	0.331	0.0116824	Arhgap12
Cluster_CA3	6.09e-05	0.259452	0.572	0.476	0.0150948	Ppp1r1b
Cluster_CA3	0.00012256	-0.609173	0.216	0.272	0.0303956	Pvalb
Cluster_CA3	0.00013598	-0.373353	0.29	0.346	0.0337233	Dpy19l1
Cluster_CA3	0.00028528	-0.412223	0.397	0.437	0.0707494	Igsf21
Cluster_CA3	0.00051913	-0.542137	0.276	0.321	0.128745	Myo16
Cluster_CA3	0.00405206	-0.537003	0.215	0.252	1	Kcnmb2
Cluster_CA3	0.00831817	-0.2945	0.533	0.539	1	Hat1
Cluster_CA3	0.0195636	-0.686443	0.247	0.272	1	Penk
Cluster_CA3	0.0230551	0.313511	0.251	0.21	1	Siglech
Cluster_Cajal-Retzius cells	1.13e-49	-0.695191	0.67	0.803	2.8e-47	Cabp7
Cluster_Cajal-Retzius cells	2.53e-42	-0.700966	0.398	0.578	6.28e-40	Pvalb
Cluster_Cajal-Retzius cells	1.59e-31	-0.338546	0.897	0.923	3.94e-29	Rims3
Cluster_Cajal-Retzius cells	2.87e-28	-0.465308	0.613	0.726	7.12e-26	Nrn1
Cluster_Cajal-Retzius cells	2.4e-27	0.608199	0.618	0.499	5.95e-25	Lyz2
Cluster_Cajal-Retzius cells	4.48e-26	-0.580672	0.395	0.548	1.11e-23	Nr2f2
Cluster_Cajal-Retzius cells	7.12e-26	0.671166	0.585	0.479	1.77e-23	Sorcs3
Cluster_Cajal-Retzius cells	4.37e-25	0.488081	0.642	0.526	1.08e-22	Cpne6
Cluster_Cajal-Retzius cells	1.55e-22	0.818396	0.411	0.29	3.85e-20	Calb1
Cluster_Cajal-Retzius cells	4.45e-22	-0.345381	0.421	0.558	1.1e-19	Gad1
Cluster_Cajal-Retzius cells	1e-21	0.468803	0.744	0.671	2.49e-19	Calb2
Cluster_Cajal-Retzius cells	1.01e-21	-0.47651	0.447	0.565	2.51e-19	Thsd7a
Cluster_Cajal-Retzius cells	3.22e-20	-0.885732	0.154	0.253	7.98e-18	Sema5b
Cluster_Cajal-Retzius cells	1.02e-19	-0.393228	0.632	0.72	2.53e-17	Syt2
Cluster_Cajal-Retzius cells	5.93e-19	-0.479912	0.442	0.55	1.47e-16	Kctd12
Cluster_Cajal-Retzius cells	2.1e-18	0.473203	0.604	0.509	5.21e-16	Dkk3
Cluster_Cajal-Retzius cells	2.97e-18	0.593037	0.437	0.329	7.37e-16	Cdh4
Cluster_Cajal-Retzius cells	1.37e-16	0.390881	0.741	0.674	3.4e-14	Plcxd3
Cluster_Cajal-Retzius cells	2.21e-16	0.680835	0.395	0.294	5.47e-14	Angpt1
Cluster_Cajal-Retzius cells	3.73e-16	0.763958	0.322	0.226	9.26e-14	Tox
Cluster_Cajal-Retzius cells	3.8e-16	-0.389633	0.474	0.58	9.42e-14	Cux2
Cluster_Cajal-Retzius cells	1.02e-15	0.295399	0.783	0.731	2.52e-13	Rasgrf2
Cluster_Cajal-Retzius cells	3.43e-15	-0.343801	0.496	0.599	8.5e-13	Sipa1l3
Cluster_Cajal-Retzius cells	3.52e-15	-0.516916	0.349	0.445	8.73e-13	Epha4
Cluster_Cajal-Retzius cells	8.15e-13	0.27088	0.733	0.677	2.02e-10	Hpcal1
Cluster_Cajal-Retzius cells	1.27e-12	0.828378	0.4	0.318	3.15e-10	Penk
Cluster_Cajal-Retzius cells	1.42e-10	-0.408652	0.183	0.258	3.53e-08	Opn3
Cluster_Cajal-Retzius cells	1.86e-10	-0.265573	0.4	0.484	4.6e-08	Ppp1r1b
Cluster_Cajal-Retzius cells	1.94e-10	-0.253879	0.5	0.591	4.81e-08	Gucy1a1
Cluster_Cajal-Retzius cells	2.04e-10	-0.402444	0.344	0.424	5.06e-08	Myo16
Cluster_Cajal-Retzius cells	4.62e-10	0.464629	0.423	0.348	1.15e-07	Arhgap6
Cluster_Cajal-Retzius cells	5.91e-09	0.269123	0.799	0.788	1.47e-06	Vat1l
Cluster_Cajal-Retzius cells	1.47e-08	0.641597	0.319	0.257	3.64e-06	Tle4
Cluster_Cajal-Retzius cells	3.34e-08	-0.400744	0.195	0.26	8.27e-06	Hapln1
Cluster_Cajal-Retzius cells	3.53e-08	-0.285306	0.689	0.733	8.75e-06	Plcxd2
Cluster_Cajal-Retzius cells	4.54e-08	0.469286	0.335	0.272	1.13e-05	Nwd2
Cluster_Cajal-Retzius cells	1.2e-07	-0.460391	0.211	0.271	2.97e-05	Igf1
Cluster_Cajal-Retzius cells	1.25e-07	-0.281591	0.371	0.439	3.09e-05	Sdk2
Cluster_Cajal-Retzius cells	5.42e-07	-0.28743	0.414	0.485	0.00013447	Nxph3
Cluster_Cajal-Retzius cells	3.1e-06	-0.293937	0.196	0.25	0.00076896	Stard5
Cluster_Cajal-Retzius cells	2.12e-05	0.27407	0.576	0.542	0.00524706	Pip5k1b
Cluster_Cajal-Retzius cells	0.00016303	0.450688	0.285	0.248	0.0404317	Cbln4
Cluster_Cajal-Retzius cells	0.0005239	0.342937	0.405	0.371	0.129928	Wfs1
Cluster_Cajal-Retzius cells	0.00211781	0.498191	0.254	0.225	0.525216	Pcsk5
Cluster_Cajal-Retzius cells	0.0315955	-0.396624	0.252	0.27	1	Cbln1
Cluster_Cajal-Retzius cells	0.0530983	0.250379	0.338	0.32	1	Bdnf
Cluster_Dentate gyrus granule cells	1.34e-44	-0.636004	0.662	0.802	3.32e-42	Pdzd2
Cluster_Dentate gyrus granule cells	1.57e-39	0.405171	0.948	0.906	3.9e-37	Igfbp5
Cluster_Dentate gyrus granule cells	5.47e-27	0.847084	0.47	0.315	1.36e-24	Cntn6
Cluster_Dentate gyrus granule cells	5.15e-23	-0.397431	0.74	0.827	1.28e-20	Sipa1l3
Cluster_Dentate gyrus granule cells	1.24e-22	0.723543	0.516	0.376	3.07e-20	Lyz2
Cluster_Dentate gyrus granule cells	1.94e-22	-0.321659	0.883	0.927	4.81e-20	Calb1
Cluster_Dentate gyrus granule cells	2.61e-17	0.960886	0.284	0.172	6.47e-15	Arhgap6
Cluster_Dentate gyrus granule cells	1.5e-15	-0.255539	0.893	0.916	3.72e-13	Epha4
Cluster_Dentate gyrus granule cells	4.27e-14	0.524322	0.448	0.326	1.06e-11	Gsg1l
Cluster_Dentate gyrus granule cells	7.5e-12	0.661846	0.325	0.23	1.86e-09	Prr16
Cluster_Dentate gyrus granule cells	9.36e-12	-0.457469	0.416	0.524	2.32e-09	Arhgef28
Cluster_Dentate gyrus granule cells	5.7e-11	-0.297062	0.723	0.793	1.41e-08	Kctd12
Cluster_Dentate gyrus granule cells	8.79e-10	0.571762	0.328	0.241	2.18e-07	Dpy19l1
Cluster_Dentate gyrus granule cells	1.09e-09	0.641564	0.299	0.214	2.7e-07	Chrm2
Cluster_Dentate gyrus granule cells	8.32e-09	-0.520464	0.212	0.295	2.06e-06	Sdk2
Cluster_Dentate gyrus granule cells	1.82e-08	0.304975	0.658	0.586	4.52e-06	Grik3
Cluster_Dentate gyrus granule cells	4.29e-08	0.347267	0.473	0.392	1.06e-05	Vwc2l
Cluster_Dentate gyrus granule cells	4.36e-08	-0.296702	0.643	0.703	1.08e-05	Npnt
Cluster_Dentate gyrus granule cells	4.17e-07	-0.470805	0.222	0.3	0.00010342	Ndst4
Cluster_Dentate gyrus granule cells	6.16e-07	0.298588	0.612	0.56	0.00015278	Arhgap12
Cluster_Dentate gyrus granule cells	2.4e-06	0.60624	0.351	0.293	0.00059465	Penk
Cluster_Dentate gyrus granule cells	3.49e-06	-0.415391	0.252	0.322	0.00086632	Orai2
Cluster_Dentate gyrus granule cells	8.4e-06	-0.265571	0.43	0.5	0.00208311	Zfp536
Cluster_Dentate gyrus granule cells	1.46e-05	0.511265	0.253	0.196	0.0036168	Kcnh5
Cluster_Dentate gyrus granule cells	3.17e-05	0.287339	0.325	0.269	0.00787382	Tle4
Cluster_Dentate gyrus granule cells	8.88e-05	0.320607	0.376	0.322	0.0220183	Galnt14
Cluster_Dentate gyrus granule cells	0.00615251	0.325183	0.257	0.22	1	Inpp4b
Cluster_Endothelial cells	2.1e-54	0.65297	0.502	0.368	5.21e-52	Cntn6
Cluster_Endothelial cells	3.82e-52	0.562748	0.565	0.439	9.47e-50	Lyz2
Cluster_Endothelial cells	2.05e-39	0.567392	0.505	0.388	5.07e-37	Grik3
Cluster_Endothelial cells	2.63e-39	-0.524219	0.413	0.534	6.53e-37	Kctd12
Cluster_Endothelial cells	2.03e-29	0.671187	0.305	0.21	5.02e-27	Arhgap6
Cluster_Endothelial cells	3.97e-22	-0.512097	0.474	0.556	9.85e-20	Cabp7
Cluster_Endothelial cells	3.93e-20	0.592936	0.288	0.212	9.75e-18	Angpt1
Cluster_Endothelial cells	2.92e-19	-0.298289	0.528	0.608	7.25e-17	Emcn
Cluster_Endothelial cells	1.09e-17	0.306308	0.634	0.572	2.69e-15	Cobll1
Cluster_Endothelial cells	1.37e-17	-0.351388	0.437	0.516	3.39e-15	Gad1
Cluster_Endothelial cells	8.02e-17	0.337162	0.64	0.602	1.99e-14	Ntsr2
Cluster_Endothelial cells	5.51e-16	-0.481612	0.263	0.334	1.37e-13	Pvalb
Cluster_Endothelial cells	4.1e-15	0.275902	0.617	0.562	1.02e-12	Chrm2
Cluster_Endothelial cells	1.76e-14	-0.393024	0.307	0.376	4.36e-12	Gfap
Cluster_Endothelial cells	1.68e-13	-0.256342	0.55	0.615	4.18e-11	Car4
Cluster_Endothelial cells	4.98e-13	-0.357783	0.322	0.389	1.24e-10	Fgd5
Cluster_Endothelial cells	5.78e-13	0.42663	0.259	0.199	1.43e-10	Kcnh5
Cluster_Endothelial cells	1.02e-12	-0.355457	0.296	0.363	2.53e-10	Nostrin
Cluster_Endothelial cells	9.65e-12	-0.321028	0.512	0.555	2.39e-09	Slc17a7
Cluster_Endothelial cells	3.25e-11	-0.359973	0.272	0.331	8.05e-09	Slc39a12
Cluster_Endothelial cells	9.6e-11	-0.324789	0.498	0.556	2.38e-08	Rims3
Cluster_Endothelial cells	2.13e-10	-0.352831	0.211	0.264	5.27e-08	Nr2f2
Cluster_Endothelial cells	2.9e-10	-0.329026	0.264	0.321	7.18e-08	Mapk4
Cluster_Endothelial cells	1.33e-09	0.26258	0.58	0.543	3.29e-07	Dkk3
Cluster_Endothelial cells	2.03e-09	-0.337809	0.23	0.283	5.03e-07	Tanc1
Cluster_Endothelial cells	5.95e-09	-0.268858	0.374	0.431	1.48e-06	Mecom
Cluster_Endothelial cells	5.64e-08	-0.282818	0.336	0.387	1.4e-05	Sipa1l3
Cluster_Endothelial cells	2.21e-06	-0.331214	0.56	0.579	0.00054713	Arc
Cluster_Endothelial cells	6.53e-05	0.250972	0.252	0.22	0.0162066	Kcnmb2
Cluster_Endothelial cells	0.0001246	-0.287152	0.243	0.277	0.0309003	Laptm5
Cluster_L2/3/6 IT ENT	8.46e-172	-0.94258	0.668	0.897	2.1e-169	Meis2
Cluster_L2/3/6 IT ENT	1.22e-69	-0.508404	0.814	0.911	3.03e-67	Kctd12
Cluster_L2/3/6 IT ENT	2.88e-58	0.968475	0.583	0.444	7.13e-56	Prdm8
Cluster_L2/3/6 IT ENT	1.15e-57	-0.615758	0.162	0.342	2.84e-55	Dcn
Cluster_L2/3/6 IT ENT	6.26e-56	-0.497933	0.766	0.874	1.55e-53	Calb1
Cluster_L2/3/6 IT ENT	5.2e-43	1.27486	0.297	0.151	1.29e-40	Pde11a
Cluster_L2/3/6 IT ENT	1.86e-41	-0.895823	0.255	0.418	4.61e-39	Gfap
Cluster_L2/3/6 IT ENT	1.98e-40	-0.505898	0.551	0.712	4.9e-38	Mapk4
Cluster_L2/3/6 IT ENT	1.43e-39	-0.480121	0.632	0.768	3.53e-37	Tmem132d
Cluster_L2/3/6 IT ENT	2.35e-37	0.407775	0.862	0.836	5.83e-35	Cdh4
Cluster_L2/3/6 IT ENT	5.38e-35	-0.932469	0.241	0.374	1.34e-32	Ndst4
Cluster_L2/3/6 IT ENT	2.07e-34	0.421165	0.911	0.894	5.14e-32	Dkk3
Cluster_L2/3/6 IT ENT	4.94e-34	0.703197	0.605	0.503	1.23e-31	Dpy19l1
Cluster_L2/3/6 IT ENT	1.71e-30	1.16791	0.264	0.152	4.24e-28	Adamtsl1
Cluster_L2/3/6 IT ENT	6.77e-29	1.21363	0.392	0.292	1.68e-26	Rmst
Cluster_L2/3/6 IT ENT	6.71e-27	-0.318007	0.829	0.909	1.66e-24	Nwd2
Cluster_L2/3/6 IT ENT	7.11e-26	-1.18011	0.334	0.442	1.76e-23	Calb2
Cluster_L2/3/6 IT ENT	4.48e-25	-0.420398	0.739	0.808	1.11e-22	Garnl3
Cluster_L2/3/6 IT ENT	1.48e-24	0.651229	0.492	0.394	3.68e-22	Tmem163
Cluster_L2/3/6 IT ENT	3.59e-23	-0.574399	0.219	0.334	8.89e-21	Slc39a12
Cluster_L2/3/6 IT ENT	4.75e-23	0.695829	0.393	0.288	1.18e-20	Zfpm2
Cluster_L2/3/6 IT ENT	8.42e-23	0.790563	0.517	0.437	2.09e-20	Cabp7
Cluster_L2/3/6 IT ENT	3.42e-22	0.387814	0.591	0.505	8.49e-20	Sema3a
Cluster_L2/3/6 IT ENT	1.57e-21	0.710353	0.448	0.374	3.9e-19	Chrm2
Cluster_L2/3/6 IT ENT	2.63e-21	1.31905	0.306	0.222	6.51e-19	Tox
Cluster_L2/3/6 IT ENT	4.7e-21	-0.39419	0.337	0.466	1.17e-18	Sdk2
Cluster_L2/3/6 IT ENT	6.11e-21	-0.278143	0.767	0.842	1.52e-18	Epha4
Cluster_L2/3/6 IT ENT	6.34e-21	-0.314245	0.531	0.662	1.57e-18	Dpyd
Cluster_L2/3/6 IT ENT	2.76e-20	0.531086	0.708	0.647	6.85e-18	Igfbp5
Cluster_L2/3/6 IT ENT	2.63e-17	-0.250308	0.655	0.759	6.53e-15	Vat1l
Cluster_L2/3/6 IT ENT	1.35e-15	-0.6451	0.394	0.473	3.34e-13	Nell1
Cluster_L2/3/6 IT ENT	2.56e-15	-0.283772	0.729	0.796	6.36e-13	Gucy1a1
Cluster_L2/3/6 IT ENT	3.1e-15	-0.389925	0.481	0.579	7.68e-13	Lamp5
Cluster_L2/3/6 IT ENT	5.76e-15	0.445891	0.733	0.719	1.43e-12	Clmn
Cluster_L2/3/6 IT ENT	7.03e-15	-0.449871	0.26	0.352	1.74e-12	Rasl10a
Cluster_L2/3/6 IT ENT	8.96e-14	0.274241	0.747	0.686	2.22e-11	Pip5k1b
Cluster_L2/3/6 IT ENT	1.16e-13	-0.420473	0.261	0.351	2.88e-11	Igfbp6
Cluster_L2/3/6 IT ENT	1.4e-12	0.402444	0.685	0.678	3.48e-10	Pdzd2
Cluster_L2/3/6 IT ENT	3.57e-12	-0.408588	0.212	0.292	8.85e-10	Ndst3
Cluster_L2/3/6 IT ENT	7.65e-11	-0.322366	0.372	0.465	1.9e-08	Igsf21
Cluster_L2/3/6 IT ENT	1.17e-10	0.659135	0.396	0.348	2.89e-08	Prr16
Cluster_L2/3/6 IT ENT	5.5e-10	0.347467	0.562	0.52	1.36e-07	Cpne4
Cluster_L2/3/6 IT ENT	1.62e-09	0.527594	0.499	0.463	4.02e-07	Angpt1
Cluster_L2/3/6 IT ENT	4.74e-09	0.293462	0.669	0.649	1.18e-06	Arhgap6
Cluster_L2/3/6 IT ENT	5.4e-09	0.347074	0.53	0.496	1.34e-06	Bcl11b
Cluster_L2/3/6 IT ENT	1.04e-08	0.371209	0.517	0.466	2.59e-06	Cux2
Cluster_L2/3/6 IT ENT	6.59e-08	0.729511	0.331	0.292	1.63e-05	Cacna2d2
Cluster_L2/3/6 IT ENT	8.4e-08	0.511583	0.335	0.289	2.08e-05	Fezf2
Cluster_L2/3/6 IT ENT	5.08e-07	0.380623	0.453	0.413	0.00012588	Pcsk5
Cluster_L2/3/6 IT ENT	7.97e-07	0.871836	0.325	0.295	0.0001977	Igfbp4
Cluster_L2/3/6 IT ENT	6.45e-06	-0.271939	0.372	0.437	0.00160064	Rims3
Cluster_L2/3/6 IT ENT	1.56e-05	-0.38023	0.218	0.266	0.00385889	Fhod3
Cluster_L2/3/6 IT ENT	4.73e-05	0.384355	0.339	0.305	0.0117377	Kcnh5
Cluster_L2/3/6 IT ENT	0.00011695	0.495214	0.407	0.388	0.0290025	Cpne8
Cluster_L2/3/6 IT ENT	0.000171	0.335696	0.43	0.417	0.0424077	Slc44a5
Cluster_L2/3/6 IT ENT	0.00231845	0.429934	0.419	0.408	0.574976	Unc13c
Cluster_L2/3/6 IT ENT	0.00309634	0.284861	0.323	0.299	0.767892	Galnt14
Cluster_L2/3/6 IT ENT	0.00572299	0.393392	0.25	0.232	1	Tle4
Cluster_L2/3/6 IT ENT	0.00809845	0.250222	0.626	0.646	1	Ntsr2
Cluster_L2/3/6 IT ENT	0.0120812	0.283419	0.318	0.305	1	Syt2
Cluster_L4/5 IT CTX	7.71e-56	0.711177	0.723	0.561	1.91e-53	Lyz2
Cluster_L4/5 IT CTX	5.54e-52	-0.344547	0.981	0.992	1.37e-49	Rims3
Cluster_L4/5 IT CTX	8.34e-48	0.96168	0.469	0.28	2.07e-45	Arhgap6
Cluster_L4/5 IT CTX	3.51e-47	-0.599815	0.735	0.812	8.71e-45	Tmem132d
Cluster_L4/5 IT CTX	2.84e-43	-0.482706	0.862	0.913	7.05e-41	Plcxd2
Cluster_L4/5 IT CTX	1.14e-36	0.627242	0.669	0.524	2.82e-34	Cpne6
Cluster_L4/5 IT CTX	8.64e-33	0.523609	0.705	0.585	2.14e-30	Cntn6
Cluster_L4/5 IT CTX	5.03e-27	-0.567214	0.608	0.699	1.25e-24	Nell1
Cluster_L4/5 IT CTX	5.1e-23	0.893453	0.343	0.226	1.26e-20	Angpt1
Cluster_L4/5 IT CTX	6.72e-21	0.304971	0.938	0.886	1.67e-18	Dkk3
Cluster_L4/5 IT CTX	3.7e-20	0.817577	0.37	0.26	9.17e-18	Rprm
Cluster_L4/5 IT CTX	5.68e-18	-0.278835	0.802	0.85	1.41e-15	Fhod3
Cluster_L4/5 IT CTX	5.74e-18	-0.321236	0.757	0.817	1.42e-15	2010300C02Rik
Cluster_L4/5 IT CTX	2.21e-14	0.314855	0.738	0.666	5.49e-12	Chrm2
Cluster_L4/5 IT CTX	3.2e-14	0.493374	0.562	0.484	7.94e-12	Prdm8
Cluster_L4/5 IT CTX	3.31e-13	-0.30391	0.652	0.736	8.21e-11	Mapk4
Cluster_L4/5 IT CTX	2.56e-12	0.398194	0.481	0.39	6.36e-10	Vwc2l
Cluster_L4/5 IT CTX	3.1e-12	-0.541524	0.274	0.365	7.69e-10	Tanc1
Cluster_L4/5 IT CTX	3.01e-11	-0.331581	0.743	0.789	7.46e-09	Lamp5
Cluster_L4/5 IT CTX	7.49e-11	0.418597	0.455	0.375	1.86e-08	Cpne4
Cluster_L4/5 IT CTX	1.13e-09	0.362086	0.52	0.453	2.79e-07	Cpne8
Cluster_L4/5 IT CTX	1.24e-09	0.389347	0.505	0.435	3.07e-07	Sema6a
Cluster_L4/5 IT CTX	1.46e-09	-0.388735	0.39	0.459	3.62e-07	Rspo1
Cluster_L4/5 IT CTX	2.89e-09	0.282459	0.762	0.723	7.16e-07	Ppp1r1b
Cluster_L4/5 IT CTX	3.97e-09	0.365553	0.762	0.732	9.86e-07	Igfbp5
Cluster_L4/5 IT CTX	4.14e-09	0.410352	0.399	0.325	1.03e-06	Vat1l
Cluster_L4/5 IT CTX	2.61e-08	-0.490542	0.238	0.311	6.46e-06	Slc39a12
Cluster_L4/5 IT CTX	9.85e-07	-0.356168	0.28	0.34	0.00024433	Cbln4
Cluster_L4/5 IT CTX	2.6e-06	0.503485	0.273	0.221	0.00064452	Gli3
Cluster_L4/5 IT CTX	5.93e-06	-0.269204	0.358	0.427	0.00147056	Syndig1
Cluster_L4/5 IT CTX	0.00019785	0.357321	0.324	0.284	0.0490659	Necab2
Cluster_L4/5 IT CTX	0.00054231	0.426888	0.287	0.254	0.134493	Trpc4
Cluster_L4/5 IT CTX	0.00058046	0.266402	0.351	0.312	0.143955	Tox
Cluster_L4/5 IT CTX	0.0021397	0.276267	0.334	0.304	0.530646	Parm1
Cluster_L4/5 IT CTX	0.00467835	0.250468	0.375	0.347	1	Id2
Cluster_L4/5 IT CTX	0.00501615	0.257706	0.375	0.349	1	Pde7b
Cluster_L4/5 IT CTX	0.0061158	0.300639	0.27	0.242	1	Shisa6
Cluster_L4/5 IT CTX	0.0763659	0.272436	0.251	0.233	1	Sema3e
Cluster_L4/5/6 CTX	7.62e-76	-0.41683	0.983	0.998	1.89e-73	Rims3
Cluster_L4/5/6 CTX	2.45e-46	-0.854518	0.402	0.686	6.08e-44	Opn3
Cluster_L4/5/6 CTX	5.27e-38	2.62408	0.318	0.108	1.31e-35	Cbln1
Cluster_L4/5/6 CTX	3.67e-37	2.42253	0.301	0.094	9.1e-35	Gfap
Cluster_L4/5/6 CTX	8.56e-37	-0.737586	0.659	0.818	2.12e-34	Thsd7a
Cluster_L4/5/6 CTX	1.77e-34	2.38529	0.274	0.081	4.4e-32	Cbln4
Cluster_L4/5/6 CTX	6.17e-34	-0.407405	0.901	0.987	1.53e-31	Clmn
Cluster_L4/5/6 CTX	1.15e-28	1.47215	0.38	0.193	2.85e-26	Igfbp4
Cluster_L4/5/6 CTX	2.08e-27	-0.278214	0.964	0.983	5.15e-25	Slc17a6
Cluster_L4/5/6 CTX	2.18e-26	-0.466402	0.706	0.878	5.41e-24	Nrn1
Cluster_L4/5/6 CTX	2.12e-25	2.29401	0.264	0.106	5.26e-23	Lypd6
Cluster_L4/5/6 CTX	6e-24	-0.472596	0.679	0.82	1.49e-21	Rnf152
Cluster_L4/5/6 CTX	2.52e-23	2.16906	0.319	0.165	6.25e-21	Nwd2
Cluster_L4/5/6 CTX	1.53e-22	-0.531827	0.578	0.762	3.78e-20	Kctd12
Cluster_L4/5/6 CTX	1.97e-22	1.98942	0.259	0.111	4.89e-20	Rprm
Cluster_L4/5/6 CTX	4.85e-22	-0.416924	0.726	0.878	1.2e-19	Tanc1
Cluster_L4/5/6 CTX	1.95e-20	0.723408	0.734	0.644	4.84e-18	Foxp2
Cluster_L4/5/6 CTX	7.59e-19	-0.306692	0.855	0.954	1.88e-16	Nell1
Cluster_L4/5/6 CTX	7.93e-19	-0.762346	0.431	0.573	1.97e-16	Car4
Cluster_L4/5/6 CTX	3.42e-18	1.417	0.375	0.238	8.48e-16	Nxph3
Cluster_L4/5/6 CTX	9.71e-18	-0.747774	0.194	0.357	2.41e-15	Cntnap5b
Cluster_L4/5/6 CTX	7.86e-17	-0.413515	0.629	0.779	1.95e-14	Slc17a7
Cluster_L4/5/6 CTX	1.83e-16	-0.410046	0.766	0.835	4.53e-14	Epha4
Cluster_L4/5/6 CTX	2.95e-16	1.21637	0.328	0.19	7.31e-14	Prr16
Cluster_L4/5/6 CTX	1.05e-15	0.860988	0.589	0.502	2.59e-13	Plcxd2
Cluster_L4/5/6 CTX	2.38e-15	0.636761	0.626	0.516	5.91e-13	Lyz2
Cluster_L4/5/6 CTX	4.39e-14	1.23873	0.252	0.134	1.09e-11	Tmem255a
Cluster_L4/5/6 CTX	4.27e-13	-0.330492	0.688	0.818	1.06e-10	Cux2
Cluster_L4/5/6 CTX	4.21e-12	-0.267562	0.863	0.917	1.05e-09	Dner
Cluster_L4/5/6 CTX	1.47e-11	-0.460425	0.313	0.457	3.64e-09	Sox11
Cluster_L4/5/6 CTX	3.78e-11	0.86066	0.447	0.354	9.37e-09	Syt2
Cluster_L4/5/6 CTX	2.4e-10	-0.334732	0.647	0.771	5.96e-08	Calb1
Cluster_L4/5/6 CTX	9.31e-10	0.739845	0.39	0.283	2.31e-07	Arhgap6
Cluster_L4/5/6 CTX	6.1e-09	-0.440989	0.367	0.485	1.51e-06	Necab1
Cluster_L4/5/6 CTX	6.3e-09	0.916791	0.578	0.537	1.56e-06	Cdh13
Cluster_L4/5/6 CTX	1.24e-08	0.991987	0.37	0.286	3.08e-06	Vat1l
Cluster_L4/5/6 CTX	1.64e-08	0.312925	0.802	0.765	4.06e-06	Vwc2l
Cluster_L4/5/6 CTX	3.86e-08	0.462064	0.682	0.62	9.56e-06	Ntsr2
Cluster_L4/5/6 CTX	7.75e-08	0.389935	0.713	0.684	1.92e-05	Garnl3
Cluster_L4/5/6 CTX	8.79e-08	0.599741	0.442	0.365	2.18e-05	Rmst
Cluster_L4/5/6 CTX	8.9e-08	0.906497	0.261	0.179	2.21e-05	Gng12
Cluster_L4/5/6 CTX	1.39e-07	0.56989	0.536	0.473	3.45e-05	Galnt14
Cluster_L4/5/6 CTX	4.71e-07	-0.311615	0.486	0.593	0.00011674	Sipa1l3
Cluster_L4/5/6 CTX	9.24e-07	0.325166	0.663	0.599	0.00022912	Unc13c
Cluster_L4/5/6 CTX	3.17e-06	0.654263	0.308	0.232	0.00078666	Cpne6
Cluster_L4/5/6 CTX	5.64e-06	0.270064	0.858	0.836	0.00139841	Chrm2
Cluster_L4/5/6 CTX	8.95e-06	0.590673	0.361	0.288	0.00222035	Igf1
Cluster_L4/5/6 CTX	1.29e-05	-0.256814	0.605	0.693	0.00320362	Sdk2
Cluster_L4/5/6 CTX	2.85e-05	-0.599793	0.228	0.303	0.00706747	Slc39a12
Cluster_L4/5/6 CTX	0.00030716	0.522117	0.416	0.373	0.0761761	Cntnap4
Cluster_L4/5/6 CTX	0.00111204	0.488053	0.357	0.312	0.275785	Hpcal1
Cluster_L4/5/6 CTX	0.00128064	-0.426355	0.207	0.264	0.317599	Gad1
Cluster_L4/5/6 CTX	0.00246718	0.555182	0.296	0.25	0.611861	Dpy19l1
Cluster_L4/5/6 CTX	0.00355065	0.31223	0.382	0.333	0.880561	Angpt1
Cluster_L4/5/6 CTX	0.00432698	0.331352	0.287	0.238	1	Plcxd3
Cluster_L4/5/6 CTX	0.00983611	0.253667	0.628	0.59	1	Grik3
Cluster_L4/5/6 CTX	0.0217086	0.354547	0.286	0.256	1	Pdzd2
Cluster_L4/5/6 CTX	0.050811	0.266771	0.399	0.374	1	Btbd11
Cluster_L4/5/6 CTX	0.0646952	-0.323366	0.375	0.404	1	Calb2
Cluster_L4/5/6 CTX	0.375235	0.271998	0.434	0.443	1	Cpne4
Cluster_L4/5/6 CTX	0.439365	0.250593	0.322	0.325	1	Cobll1
Cluster_L4/5/6 CTX	0.668169	0.295185	0.565	0.657	1	Pde7b
Cluster_L5	1.83e-24	-0.451747	0.863	0.914	4.53e-22	Tmem132d
Cluster_L5	5.74e-14	0.662407	0.49	0.355	1.42e-11	Angpt1
Cluster_L5	1.48e-11	0.491579	0.662	0.562	3.67e-09	Lyz2
Cluster_L5	7.85e-11	0.716391	0.395	0.284	1.95e-08	Arhgap6
Cluster_L5	2.51e-09	-0.443178	0.43	0.546	6.24e-07	Nrep
Cluster_L5	7.13e-09	0.351402	0.654	0.568	1.77e-06	Cntn6
Cluster_L5	3.97e-08	-0.270032	0.88	0.901	9.84e-06	Rims3
Cluster_L5	7.95e-08	0.473576	0.516	0.439	1.97e-05	Syt2
Cluster_L5	6.1e-07	-0.262078	0.773	0.815	0.00015124	Fhod3
Cluster_L5	2.25e-06	0.250623	0.812	0.76	0.00055779	Chrm2
Cluster_L5	3.42e-06	-0.50133	0.278	0.365	0.000847	Kctd12
Cluster_L5	3.07e-05	0.260064	0.857	0.812	0.00761919	Galnt14
Cluster_L5	4.27e-05	-0.505619	0.273	0.346	0.0105884	Cdh20
Cluster_L5	0.00014723	0.443272	0.418	0.356	0.036512	Shisa6
Cluster_L5	0.00038233	0.256068	0.727	0.68	0.094818	Cpne6
Cluster_L5	0.00039188	0.455147	0.275	0.219	0.0971859	Sncg
Cluster_L5	0.00092248	-0.315698	0.303	0.366	0.228774	Car4
Cluster_L5	0.00184848	0.300212	0.418	0.366	0.458422	Fos
Cluster_L5	0.0027808	-0.37975	0.493	0.552	0.68964	Gad1
Cluster_L5	0.00363938	0.291386	0.507	0.461	0.902566	Syt17
Cluster_L5	0.00564968	0.29143	0.39	0.349	1	Cdh4
Cluster_L5	0.0109291	-0.28428	0.558	0.598	1	Cabp7
Cluster_L5	0.0131162	0.262352	0.321	0.279	1	Rprm
Cluster_L5	0.0156624	-0.409864	0.217	0.256	1	Syndig1
Cluster_L5	0.023906	-0.26398	0.288	0.328	1	Htr1f
Cluster_L5	0.0296874	0.322613	0.301	0.269	1	Tox
Cluster_L5	0.0326492	0.294161	0.324	0.297	1	Kcnh5
Cluster_L5	0.0475844	-0.320693	0.469	0.492	1	Plcxd2
Cluster_L5	0.064304	-0.332527	0.29	0.322	1	Myl4
Cluster_L5	0.118869	-0.293027	0.277	0.298	1	Slc17a6
Cluster_L5 CTX	1.01e-27	0.62225	0.689	0.548	2.5e-25	Lyz2
Cluster_L5 CTX	8.34e-27	-0.643632	0.543	0.671	2.07e-24	Zfp536
Cluster_L5 CTX	3.63e-23	0.748463	0.398	0.249	9.01e-21	Arhgap6
Cluster_L5 CTX	2.95e-21	-1.15285	0.23	0.359	7.3e-19	Gfap
Cluster_L5 CTX	2.89e-18	0.379714	0.727	0.607	7.17e-16	Grik3
Cluster_L5 CTX	2.96e-15	0.380875	0.657	0.538	7.35e-13	Cntn6
Cluster_L5 CTX	6.14e-15	-0.643463	0.354	0.462	1.52e-12	Kctd12
Cluster_L5 CTX	7e-15	-0.758654	0.637	0.702	1.73e-12	Cabp7
Cluster_L5 CTX	1.12e-13	0.588452	0.332	0.224	2.78e-11	Angpt1
Cluster_L5 CTX	2.41e-11	-0.260258	0.948	0.954	5.98e-09	Arc
Cluster_L5 CTX	1.05e-10	0.260848	0.912	0.901	2.59e-08	Dkk3
Cluster_L5 CTX	1.14e-08	0.449219	0.416	0.346	2.82e-06	Tox
Cluster_L5 CTX	2.23e-07	0.300779	0.623	0.554	5.53e-05	Ppp1r1b
Cluster_L5 CTX	2.23e-07	-0.530947	0.256	0.325	5.54e-05	Slc39a12
Cluster_L5 CTX	2.79e-07	0.408923	0.51	0.431	6.91e-05	Syt2
Cluster_L5 CTX	3.83e-07	0.30658	0.403	0.325	9.5e-05	Gm19410
Cluster_L5 CTX	3.94e-07	0.414465	0.378	0.308	9.77e-05	Galnt14
Cluster_L5 CTX	5.64e-07	-0.366779	0.622	0.669	0.00013997	Rims3
Cluster_L5 CTX	7.78e-07	0.357353	0.423	0.358	0.00019295	Fezf2
Cluster_L5 CTX	1.94e-06	-0.370443	0.484	0.541	0.00048118	Sipa1l3
Cluster_L5 CTX	2.47e-06	0.399558	0.309	0.244	0.00061279	Prr16
Cluster_L5 CTX	2.65e-06	0.279204	0.295	0.228	0.0006582	Col6a1
Cluster_L5 CTX	4.19e-06	-0.363428	0.349	0.413	0.00103895	Arhgef28
Cluster_L5 CTX	1.19e-05	0.37417	0.462	0.402	0.002958	Vat1l
Cluster_L5 CTX	2.93e-05	0.280655	0.398	0.332	0.00727311	Kcnh5
Cluster_L5 CTX	9.54e-05	-0.516003	0.428	0.469	0.0236533	Necab2
Cluster_L5 CTX	0.00014073	0.309132	0.307	0.252	0.0349004	Cpne8
Cluster_L5 CTX	0.00016632	0.268184	0.398	0.346	0.0412482	Id2
Cluster_L5 CTX	0.0001826	0.28388	0.352	0.294	0.0452836	Pcsk5
Cluster_L5 CTX	0.0007422	0.251889	0.325	0.275	0.184066	Trpc4
Cluster_L5 CTX	0.00083566	0.325814	0.272	0.224	0.207243	Unc13c
Cluster_L5 CTX	0.00160799	0.284275	0.263	0.22	0.398781	Ndst3
Cluster_L5 CTX	0.00257309	0.260929	0.28	0.235	0.638128	Rbp4
Cluster_L5 CTX	0.00472222	0.260156	0.256	0.217	1	Fos
Cluster_L5 CTX	0.00710342	0.253115	0.27	0.231	1	Gli3
Cluster_L5 CTX	0.0352419	-0.308797	0.382	0.407	1	Aqp4
Cluster_L5 CTX	0.0510283	-0.310688	0.257	0.28	1	Rab3b
Cluster_L5 NP/NP SUB	3.51e-05	-0.568177	0.655	0.732	0.0086978	Stard5
Cluster_L5 NP/NP SUB	0.0004505	-0.545279	0.368	0.529	0.111725	Fhod3
Cluster_L5 NP/NP SUB	0.00050483	0.733049	0.253	0.134	0.125197	Syt6
Cluster_L5 NP/NP SUB	0.00213684	0.751052	0.385	0.297	0.529937	Arhgap6
Cluster_L5 NP/NP SUB	0.00754237	-0.279585	0.774	0.815	1	Rims3
Cluster_L5 NP/NP SUB	0.00972167	0.601314	0.446	0.37	1	Rbp4
Cluster_L5 NP/NP SUB	0.0102452	0.364167	0.649	0.594	1	Lyz2
Cluster_L5 NP/NP SUB	0.0108048	-0.357753	0.514	0.674	1	Clmn
Cluster_L5 NP/NP SUB	0.0163221	0.352761	0.581	0.496	1	Ppp1r1b
Cluster_L5 NP/NP SUB	0.0206363	0.575108	0.314	0.239	1	Angpt1
Cluster_L5 NP/NP SUB	0.026238	0.456017	0.615	0.558	1	Rprm
Cluster_L5 NP/NP SUB	0.036784	-0.421007	0.524	0.576	1	Satb2
Cluster_L5 NP/NP SUB	0.0696738	0.473204	0.554	0.496	1	Sema3e
Cluster_L5 NP/NP SUB	0.074135	0.340802	0.446	0.391	1	Aqp4
Cluster_L5 NP/NP SUB	0.0847635	-0.670992	0.199	0.257	1	Hapln1
Cluster_L5 NP/NP SUB	0.0911041	0.47591	0.304	0.254	1	Kcnmb2
Cluster_L5 NP/NP SUB	0.0995462	0.373764	0.307	0.25	1	Sorcs3
Cluster_L5 NP/NP SUB	0.109209	0.294345	0.584	0.572	1	Hpcal1
Cluster_L5 NP/NP SUB	0.130973	0.303886	0.615	0.63	1	Arhgap12
Cluster_L5 NP/NP SUB	0.187745	-0.282402	0.429	0.486	1	2010300C02Rik
Cluster_L5 NP/NP SUB	0.233135	0.321116	0.389	0.359	1	Rorb
Cluster_L5 NP/NP SUB	0.24505	-0.26115	0.608	0.63	1	Slc17a6
Cluster_L5 NP/NP SUB	0.253299	0.362208	0.361	0.341	1	Igsf21
Cluster_L5 NP/NP SUB	0.254979	0.29326	0.338	0.308	1	Cux2
Cluster_L5 NP/NP SUB	0.2589	-0.286422	0.605	0.605	1	Ccn2
Cluster_L5 NP/NP SUB	0.268738	-0.43297	0.253	0.293	1	Slc39a12
Cluster_L5 NP/NP SUB	0.269674	0.284854	0.334	0.304	1	Cpne8
Cluster_L5 NP/NP SUB	0.270779	0.304709	0.314	0.275	1	Cdh6
Cluster_L5 NP/NP SUB	0.310055	0.331379	0.324	0.297	1	Id2
Cluster_L5 NP/NP SUB	0.330803	0.364895	0.375	0.348	1	Lamp5
Cluster_L5 NP/NP SUB	0.759001	0.296373	0.253	0.264	1	Wfs1
Cluster_L5 PPP	3.07e-08	0.325523	1	1	7.62e-06	Dkk3
Cluster_L5 PPP	1.16e-06	-0.851544	0.649	0.968	0.00028884	Ntsr2
Cluster_L5 PPP	5.15e-05	-1.0075	0.584	0.81	0.01277	Bcl11b
Cluster_L5 PPP	0.00024413	-0.791022	0.649	0.889	0.0605433	Pou3f1
Cluster_L5 PPP	0.00054283	-0.569053	0.805	0.968	0.134623	Tanc1
Cluster_L5 PPP	0.00072427	-0.411126	0.974	0.984	0.179618	Arc
Cluster_L5 PPP	0.00208691	-1.19943	0.273	0.524	0.517554	Gfap
Cluster_L5 PPP	0.00251025	-0.343578	0.974	0.984	0.622541	Cabp7
Cluster_L5 PPP	0.00263433	-1.63771	0.195	0.429	0.653314	Rmst
Cluster_L5 PPP	0.00345113	-0.59961	0.597	0.81	0.855879	Ndst3
Cluster_L5 PPP	0.0035412	-1.05054	0.299	0.54	0.878217	Cntnap5b
Cluster_L5 PPP	0.0106235	-1.48456	0.26	0.46	1	Slc39a12
Cluster_L5 PPP	0.01264	0.810422	0.688	0.635	1	Shisa6
Cluster_L5 PPP	0.0185184	-0.408059	0.753	0.857	1	Epha4
Cluster_L5 PPP	0.0219224	0.294677	0.896	0.952	1	Fn1
Cluster_L5 PPP	0.0261581	0.870297	0.286	0.127	1	Vip
Cluster_L5 PPP	0.0275358	-0.508077	0.688	0.873	1	Sema3e
Cluster_L5 PPP	0.030019	1.28267	0.364	0.206	1	Cpne4
Cluster_L5 PPP	0.0335432	-0.556174	0.571	0.683	1	Id2
Cluster_L5 PPP	0.0351747	0.384717	0.909	0.857	1	Arhgap12
Cluster_L5 PPP	0.040344	-0.481198	0.182	0.349	1	Hpcal1
Cluster_L5 PPP	0.0412997	-0.584106	0.364	0.571	1	Plcxd2
Cluster_L5 PPP	0.0445479	-0.699828	0.273	0.46	1	Gucy1a1
Cluster_L5 PPP	0.0470067	-0.412282	0.727	0.905	1	Sipa1l3
Cluster_L5 PPP	0.0634348	-0.276288	0.909	0.921	1	Slc17a6
Cluster_L5 PPP	0.0674381	-0.39866	0.779	0.889	1	Tmem132d
Cluster_L5 PPP	0.0678667	-0.523537	0.208	0.365	1	Adamts2
Cluster_L5 PPP	0.0701283	-0.346313	0.779	0.857	1	Rxfp1
Cluster_L5 PPP	0.0771108	-1.23137	0.182	0.302	1	Opn3
Cluster_L5 PPP	0.0791093	-0.60188	0.545	0.698	1	Clmn
Cluster_L5 PPP	0.0794383	0.719339	0.662	0.603	1	Vat1l
Cluster_L5 PPP	0.105798	-0.430346	0.169	0.302	1	Mapk4
Cluster_L5 PPP	0.145712	-0.324774	0.481	0.603	1	Sdk2
Cluster_L5 PPP	0.153236	-0.274093	0.779	0.873	1	Dpy19l1
Cluster_L5 PPP	0.16037	0.272285	0.831	0.857	1	Tox
Cluster_L5 PPP	0.173623	-0.66308	0.208	0.302	1	Myo16
Cluster_L5 PPP	0.239548	0.409859	0.286	0.206	1	Gli3
Cluster_L5 PPP	0.247692	0.654302	0.299	0.206	1	Sema6a
Cluster_L5 PPP	0.248083	-0.509991	0.364	0.476	1	Aqp4
Cluster_L5 PPP	0.296046	0.461205	0.494	0.429	1	Necab2
Cluster_L5 PPP	0.324019	0.355196	0.831	0.857	1	2010300C02Rik
Cluster_L5 PPP	0.325287	0.321579	0.74	0.762	1	Pip5k1b
Cluster_L5 PPP	0.32743	-0.257075	0.364	0.476	1	Hs3st2
Cluster_L5 PPP	0.352283	-0.54087	0.247	0.317	1	Meis2
Cluster_L5 PPP	0.355052	0.270185	0.584	0.508	1	Kctd8
Cluster_L5 PPP	0.367216	1.08377	0.286	0.238	1	Nell1
Cluster_L5 PPP	0.380565	0.305419	0.597	0.524	1	Cntn6
Cluster_L5 PPP	0.380793	-0.300852	0.636	0.714	1	Htr1f
Cluster_L5 PPP	0.385288	0.434866	0.649	0.635	1	Grik3
Cluster_L5 PPP	0.386736	-0.639005	0.325	0.381	1	Rorb
Cluster_L5 PPP	0.387864	0.347441	0.597	0.508	1	Chrm2
Cluster_L5 PPP	0.396442	-0.341765	0.351	0.413	1	Slit2
Cluster_L5 PPP	0.404953	-0.331841	0.519	0.603	1	Nxph3
Cluster_L5 PPP	0.411323	-0.631461	0.364	0.397	1	Nrn1
Cluster_L5 PPP	0.427069	0.348552	0.571	0.571	1	Gad2
Cluster_L5 PPP	0.451656	-0.388689	0.286	0.365	1	Rnf152
Cluster_L5 PPP	0.517368	0.752659	0.26	0.206	1	Pkib
Cluster_L5 PPP	0.548208	0.35928	0.26	0.238	1	Cux2
Cluster_L5 PPP	0.696863	0.275014	0.286	0.27	1	Tle4
Cluster_L5 PPP	0.714865	0.713886	0.26	0.254	1	Kcnh5
Cluster_L5 PPP	0.774751	0.275086	0.247	0.286	1	Rab3b
Cluster_L5 PPP	0.91057	0.531297	0.26	0.286	1	Rims3
Cluster_L5 PPP	0.918811	0.254094	0.571	0.619	1	Cacna2d2
Cluster_L6 CT CTX	1.01e-21	0.52064	0.698	0.623	2.51e-19	Rprm
Cluster_L6 CT CTX	6.66e-21	0.625363	0.502	0.395	1.65e-18	Trbc2
Cluster_L6 CT CTX	4.82e-16	-0.262668	0.949	0.962	1.19e-13	Arc
Cluster_L6 CT CTX	3.22e-14	0.356366	0.564	0.466	7.97e-12	Lyz2
Cluster_L6 CT CTX	7.41e-14	-0.421937	0.475	0.577	1.84e-11	Fhod3
Cluster_L6 CT CTX	9.72e-13	0.682835	0.3	0.215	2.41e-10	Arhgap6
Cluster_L6 CT CTX	1.49e-12	0.60939	0.267	0.186	3.69e-10	Angpt1
Cluster_L6 CT CTX	8.99e-12	0.482222	0.449	0.366	2.23e-09	Cpne6
Cluster_L6 CT CTX	2.06e-09	-0.384449	0.446	0.52	5.1e-07	Gadd45a
Cluster_L6 CT CTX	1.6e-08	-0.352463	0.611	0.663	3.96e-06	Rims3
Cluster_L6 CT CTX	8.8e-08	-0.477404	0.262	0.332	2.18e-05	Kctd12
Cluster_L6 CT CTX	1.03e-05	-0.272739	0.513	0.561	0.00254776	Tmem132d
Cluster_L6 CT CTX	1.78e-05	-0.348653	0.338	0.398	0.00442063	Htr1f
Cluster_L6 CT CTX	2.49e-05	-0.359881	0.253	0.313	0.00617982	Mapk4
Cluster_L6 CT CTX	5.88e-05	-0.459765	0.235	0.285	0.0145894	Plcxd2
Cluster_L6 CT CTX	0.00015382	-0.415858	0.345	0.388	0.0381476	Myl4
Cluster_L6 CT CTX	0.00020779	0.253387	0.417	0.371	0.0515328	Syt2
Cluster_L6 CT CTX	0.0002641	0.290276	0.251	0.207	0.0654958	Shisa6
Cluster_L6 CT CTX	0.00264068	-0.357593	0.327	0.361	0.65489	Sema5b
Cluster_L6 CT CTX	0.00683886	-0.274209	0.216	0.25	1	Rmst
Cluster_L6 CT CTX	0.240098	0.255232	0.294	0.286	1	Gad2
Cluster_L6b/CT ENT	4.45e-15	-1.31448	0.389	0.78	1.1e-12	Epha4
Cluster_L6b/CT ENT	3.44e-10	1.18705	0.817	0.627	8.53e-08	Nwd2
Cluster_L6b/CT ENT	1.2e-09	2.60041	0.44	0.144	2.96e-07	Nell1
Cluster_L6b/CT ENT	2.83e-09	-1.54894	0.183	0.492	7.01e-07	Ntsr2
Cluster_L6b/CT ENT	2.94e-09	-1.81345	0.151	0.424	7.29e-07	Tanc1
Cluster_L6b/CT ENT	6.36e-09	-0.673521	0.786	0.958	1.58e-06	Kctd12
Cluster_L6b/CT ENT	7.09e-09	-0.66479	0.786	0.941	1.76e-06	Pip5k1b
Cluster_L6b/CT ENT	9.74e-09	2.21119	0.488	0.203	2.41e-06	Penk
Cluster_L6b/CT ENT	2.62e-08	-0.601369	0.825	0.958	6.51e-06	Igfbp5
Cluster_L6b/CT ENT	4.05e-08	-0.597984	0.825	0.915	1e-05	Calb1
Cluster_L6b/CT ENT	6.55e-08	1.41284	0.623	0.432	1.62e-05	Cdh4
Cluster_L6b/CT ENT	1.39e-07	-1.59752	0.171	0.415	3.45e-05	Gfra2
Cluster_L6b/CT ENT	4.96e-07	-1.56088	0.123	0.347	0.00012294	Arhgef28
Cluster_L6b/CT ENT	9.67e-07	-1.35826	0.242	0.492	0.00023988	Plekha2
Cluster_L6b/CT ENT	1.03e-06	1.80562	0.5	0.254	0.00025634	Arc
Cluster_L6b/CT ENT	2.04e-06	-0.884301	0.349	0.593	0.00050519	Gad1
Cluster_L6b/CT ENT	2.37e-06	2.52213	0.425	0.229	0.00058813	Col6a1
Cluster_L6b/CT ENT	7.32e-06	-0.605634	0.687	0.864	0.00181477	Pcsk5
Cluster_L6b/CT ENT	8.31e-06	0.837239	0.698	0.517	0.00206136	Sox11
Cluster_L6b/CT ENT	2.8e-05	-0.741863	0.337	0.61	0.00693465	Rasgrf2
Cluster_L6b/CT ENT	4.04e-05	-0.414292	0.865	0.958	0.0100094	Syt17
Cluster_L6b/CT ENT	4.19e-05	1.15094	0.667	0.602	0.0103854	Dcn
Cluster_L6b/CT ENT	5.63e-05	0.613389	0.837	0.754	0.013951	Garnl3
Cluster_L6b/CT ENT	0.00031667	-0.518767	0.667	0.839	0.078533	Thsd7a
Cluster_L6b/CT ENT	0.00046445	-0.963837	0.226	0.407	0.115183	Gfap
Cluster_L6b/CT ENT	0.00075275	-0.424554	0.48	0.703	0.186682	Zfp536
Cluster_L6b/CT ENT	0.00078677	0.349416	0.913	0.873	0.19512	Nr2f2
Cluster_L6b/CT ENT	0.00217998	-0.527728	0.456	0.644	0.540634	Npy2r
Cluster_L6b/CT ENT	0.00233905	0.677859	0.508	0.364	0.580084	Sorcs3
Cluster_L6b/CT ENT	0.00239388	-1.18778	0.143	0.271	0.593683	Vwc2l
Cluster_L6b/CT ENT	0.00327721	-0.830121	0.155	0.288	0.812749	Chrm2
Cluster_L6b/CT ENT	0.00923584	-0.705098	0.254	0.39	1	Cabp7
Cluster_L6b/CT ENT	0.0103819	0.632324	0.623	0.559	1	Galnt14
Cluster_L6b/CT ENT	0.0132065	-0.294975	0.825	0.881	1	2010300C02Rik
Cluster_L6b/CT ENT	0.0153288	-0.482761	0.448	0.602	1	Car4
Cluster_L6b/CT ENT	0.0230341	0.592534	0.46	0.373	1	Tmem255a
Cluster_L6b/CT ENT	0.0260809	-0.430478	0.405	0.534	1	Shisa6
Cluster_L6b/CT ENT	0.032433	0.971108	0.401	0.305	1	Bdnf
Cluster_L6b/CT ENT	0.0397528	-0.581279	0.163	0.263	1	Pdzrn3
Cluster_L6b/CT ENT	0.0674436	0.343049	0.738	0.712	1	Cntn6
Cluster_L6b/CT ENT	0.070467	0.572995	0.381	0.322	1	Pdzd2
Cluster_L6b/CT ENT	0.0718985	-0.29233	0.548	0.653	1	Grik3
Cluster_L6b/CT ENT	0.0781413	0.657813	0.464	0.415	1	Mapk4
Cluster_L6b/CT ENT	0.0851025	0.396115	0.29	0.203	1	Id2
Cluster_L6b/CT ENT	0.108971	-0.458971	0.325	0.415	1	Tle4
Cluster_L6b/CT ENT	0.126996	-0.280452	0.464	0.559	1	Stard5
Cluster_L6b/CT ENT	0.133237	0.581215	0.401	0.364	1	Arhgap6
Cluster_L6b/CT ENT	0.195949	0.543583	0.258	0.203	1	Rprm
Cluster_L6b/CT ENT	0.482634	0.533334	0.349	0.356	1	Nrp2
Cluster_L6b/CT ENT	0.598662	0.282891	0.393	0.407	1	Cntnap5b
Cluster_L6b/CT ENT	0.977015	0.381418	0.341	0.364	1	Gad2
Cluster_Lamp5+ IN	5.57e-68	1.02072	0.575	0.365	1.38e-65	Arhgap6
Cluster_Lamp5+ IN	1.34e-60	0.735308	0.711	0.519	3.32e-58	Grik3
Cluster_Lamp5+ IN	1.18e-56	0.620594	0.798	0.667	2.93e-54	Lyz2
Cluster_Lamp5+ IN	9.23e-56	0.572494	0.802	0.674	2.29e-53	Cntn6
Cluster_Lamp5+ IN	1.47e-49	-0.862916	0.378	0.577	3.64e-47	Nrep
Cluster_Lamp5+ IN	1.55e-49	-0.51413	0.805	0.869	3.85e-47	Tmem132d
Cluster_Lamp5+ IN	5.92e-44	-0.377498	0.864	0.928	1.47e-41	Mapk4
Cluster_Lamp5+ IN	2.58e-37	-0.316651	0.972	0.986	6.41e-35	Arc
Cluster_Lamp5+ IN	9.17e-35	0.465947	0.775	0.677	2.27e-32	Ntsr2
Cluster_Lamp5+ IN	1.11e-34	0.786128	0.47	0.314	2.75e-32	Angpt1
Cluster_Lamp5+ IN	6.01e-32	0.408428	0.853	0.776	1.49e-29	Cpne6
Cluster_Lamp5+ IN	2.11e-29	-0.342246	0.872	0.904	5.23e-27	Nrn1
Cluster_Lamp5+ IN	2.47e-27	0.530912	0.618	0.484	6.12e-25	Chrm2
Cluster_Lamp5+ IN	6.46e-26	-0.306309	0.942	0.96	1.6e-23	Rims3
Cluster_Lamp5+ IN	1.05e-25	0.363604	0.851	0.781	2.6e-23	Ppp1r1b
Cluster_Lamp5+ IN	1.97e-21	-0.692733	0.399	0.507	4.89e-19	Nell1
Cluster_Lamp5+ IN	5.93e-19	-0.600701	0.553	0.645	1.47e-16	Penk
Cluster_Lamp5+ IN	2.23e-16	0.533953	0.43	0.325	5.52e-14	Vwc2l
Cluster_Lamp5+ IN	4.73e-14	-0.397232	0.422	0.529	1.17e-11	Bdnf
Cluster_Lamp5+ IN	7.16e-14	0.689591	0.276	0.191	1.77e-11	Mdga1
Cluster_Lamp5+ IN	9.41e-14	0.515856	0.363	0.264	2.33e-11	Col6a1
Cluster_Lamp5+ IN	1.85e-13	0.333473	0.654	0.579	4.59e-11	Syt17
Cluster_Lamp5+ IN	2.08e-13	0.428599	0.493	0.407	5.16e-11	Prdm8
Cluster_Lamp5+ IN	7.04e-13	0.457406	0.439	0.352	1.75e-10	Rasl10a
Cluster_Lamp5+ IN	1.97e-12	-0.325896	0.677	0.749	4.89e-10	Acsbg1
Cluster_Lamp5+ IN	6.64e-12	-0.576102	0.19	0.274	1.65e-09	Slc39a12
Cluster_Lamp5+ IN	1.19e-10	0.384144	0.463	0.385	2.95e-08	Gm19410
Cluster_Lamp5+ IN	1.72e-10	0.335507	0.575	0.508	4.27e-08	Cpne4
Cluster_Lamp5+ IN	3.69e-10	-0.283668	0.68	0.734	9.15e-08	Fhod3
Cluster_Lamp5+ IN	1.05e-09	0.491091	0.328	0.258	2.61e-07	Sema6a
Cluster_Lamp5+ IN	2.89e-09	-0.404453	0.378	0.457	7.17e-07	Cabp7
Cluster_Lamp5+ IN	4.53e-09	0.632959	0.269	0.206	1.12e-06	Rprm
Cluster_Lamp5+ IN	3.65e-08	0.31703	0.478	0.412	9.05e-06	Cpne8
Cluster_Lamp5+ IN	5.12e-08	-0.356778	0.437	0.509	1.27e-05	Plcxd2
Cluster_Lamp5+ IN	1.1e-07	-0.2991	0.454	0.519	2.72e-05	Col19a1
Cluster_Lamp5+ IN	1.79e-07	-0.358425	0.286	0.355	4.43e-05	Zfp536
Cluster_Lamp5+ IN	2.96e-07	0.369116	0.337	0.274	7.35e-05	Igsf21
Cluster_Lamp5+ IN	9.61e-07	0.3905	0.282	0.224	0.00023827	Gli3
Cluster_Lamp5+ IN	2.04e-06	-0.294073	0.333	0.397	0.00050588	Syndig1
Cluster_Lamp5+ IN	2.99e-06	-0.304394	0.308	0.371	0.00074065	Slit2
Cluster_Lamp5+ IN	4.71e-06	0.298412	0.43	0.377	0.0011687	Vat1l
Cluster_Lamp5+ IN	9.17e-05	-0.303096	0.323	0.378	0.0227368	Slc17a6
Cluster_Lamp5+ IN	0.00022152	0.250266	0.551	0.513	0.0549379	Necab2
Cluster_Lamp5+ IN	0.00251054	-0.259795	0.295	0.334	0.622614	Rmst
Cluster_Macrophages	4.38e-22	0.588469	0.553	0.424	1.09e-19	Grik3
Cluster_Macrophages	7.04e-22	0.600961	0.549	0.433	1.75e-19	Cntn6
Cluster_Macrophages	2.17e-18	0.73717	0.34	0.226	5.39e-16	Arhgap6
Cluster_Macrophages	3.94e-18	-0.250055	0.855	0.888	9.77e-16	Kctd12
Cluster_Macrophages	1.16e-14	0.331449	0.682	0.599	2.88e-12	Lyz2
Cluster_Macrophages	1.56e-11	-0.528302	0.244	0.33	3.87e-09	Slc39a12
Cluster_Macrophages	1.56e-10	-0.544829	0.276	0.361	3.88e-08	Mapk4
Cluster_Macrophages	2.41e-09	-0.573645	0.452	0.523	5.98e-07	Cabp7
Cluster_Macrophages	5.12e-09	-0.382298	0.436	0.513	1.27e-06	Gad1
Cluster_Macrophages	1.48e-07	0.400487	0.289	0.221	3.68e-05	Cobll1
Cluster_Macrophages	2.96e-07	-0.35493	0.456	0.526	7.34e-05	Rims3
Cluster_Macrophages	5.58e-07	0.413838	0.314	0.247	0.00013848	Angpt1
Cluster_Macrophages	2.79e-06	-0.425107	0.246	0.305	0.00069126	Pvalb
Cluster_Macrophages	2.87e-06	-0.391691	0.57	0.606	0.00071157	Arc
Cluster_Macrophages	3.58e-06	0.367337	0.533	0.471	0.00088679	Cd68
Cluster_Macrophages	0.00018263	-0.284405	0.563	0.574	0.0452911	Slc17a7
Cluster_Macrophages	0.00023414	-0.284459	0.4	0.447	0.0580656	Gfap
Cluster_Macrophages	0.00104493	-0.271321	0.33	0.372	0.259142	Rmst
Cluster_Macrophages	0.00266636	0.314299	0.324	0.288	0.661258	Cpne6
Cluster_Macrophages	0.0882099	0.276633	0.299	0.278	1	Igfbp4
Cluster_Meis2	5.87e-09	3.02202	0.308	0.066	1.46e-06	Sema3a
Cluster_Meis2	5.23e-05	1.35621	0.667	0.453	0.0129581	Cabp7
Cluster_Meis2	0.00018399	1.58278	0.385	0.166	0.0456306	Penk
Cluster_Meis2	0.00034954	-0.719051	0.667	0.843	0.0866858	Plcxd2
Cluster_Meis2	0.00045312	1.73554	0.359	0.163	0.112375	Slc17a6
Cluster_Meis2	0.000658	-0.539555	0.974	0.995	0.163185	Th
Cluster_Meis2	0.00066531	-1.27178	0.385	0.61	0.164997	Parm1
Cluster_Meis2	0.00087332	0.853191	0.769	0.607	0.216583	Rmst
Cluster_Meis2	0.00125746	-2.24652	0.051	0.295	0.31185	Gfra2
Cluster_Meis2	0.00323905	-0.482225	1	0.997	0.803285	Slc6a3
Cluster_Meis2	0.0101123	1.38725	0.308	0.168	1	Shisa6
Cluster_Meis2	0.0136575	0.829751	0.538	0.374	1	Arhgap6
Cluster_Meis2	0.0140827	-0.742242	0.205	0.42	1	Igsf21
Cluster_Meis2	0.0143594	0.811321	0.59	0.486	1	Ebf3
Cluster_Meis2	0.0170257	0.857089	0.462	0.303	1	Unc13c
Cluster_Meis2	0.017722	-0.80592	0.513	0.657	1	Cdh13
Cluster_Meis2	0.0218261	-0.556261	0.641	0.741	1	Rasgrf2
Cluster_Meis2	0.0260275	0.599258	0.667	0.575	1	Sema6a
Cluster_Meis2	0.030035	-0.462431	0.641	0.741	1	Grik3
Cluster_Meis2	0.0357401	0.903523	0.308	0.182	1	Syt6
Cluster_Meis2	0.0361509	0.80002	0.538	0.424	1	Necab2
Cluster_Meis2	0.0471201	0.617081	0.795	0.719	1	Chrm2
Cluster_Meis2	0.0488562	-1.18745	0.231	0.37	1	Igf1
Cluster_Meis2	0.0595864	-0.420604	0.564	0.744	1	Nwd2
Cluster_Meis2	0.0666756	-0.351612	0.641	0.82	1	Dner
Cluster_Meis2	0.073872	-0.495979	0.59	0.701	1	Syt17
Cluster_Meis2	0.0753775	0.400375	0.821	0.75	1	Igfbp5
Cluster_Meis2	0.0879454	-0.462802	0.359	0.466	1	Epha4
Cluster_Meis2	0.0916898	-0.338643	0.692	0.777	1	Plcxd3
Cluster_Meis2	0.108069	-0.258469	0.333	0.524	1	Cux2
Cluster_Meis2	0.110516	-0.597093	0.564	0.624	1	Tmem255a
Cluster_Meis2	0.110566	-0.34847	0.359	0.516	1	Slc39a12
Cluster_Meis2	0.126371	-0.370794	0.667	0.78	1	Cacna2d2
Cluster_Meis2	0.131492	-0.29896	0.769	0.812	1	Vat1l
Cluster_Meis2	0.137734	-0.616067	0.179	0.292	1	Nxph3
Cluster_Meis2	0.141527	-0.370608	0.205	0.332	1	Rfx4
Cluster_Meis2	0.147549	-0.551595	0.333	0.455	1	Gsg1l
Cluster_Meis2	0.154951	0.381487	0.436	0.335	1	Tmem163
Cluster_Meis2	0.162411	-0.265571	0.154	0.275	1	Dpyd
Cluster_Meis2	0.16779	-0.337053	0.564	0.677	1	Arhgap12
Cluster_Meis2	0.173707	0.401286	0.667	0.627	1	Bhlhe40
Cluster_Meis2	0.175072	-0.517479	0.231	0.348	1	Kctd12
Cluster_Meis2	0.175986	-0.495178	0.359	0.469	1	Arhgef28
Cluster_Meis2	0.181485	-0.970985	0.282	0.372	1	Mapk4
Cluster_Meis2	0.184763	0.699062	0.333	0.245	1	Plch1
Cluster_Meis2	0.18526	-0.822975	0.513	0.564	1	Gad1
Cluster_Meis2	0.193166	-0.377318	0.308	0.418	1	Foxp2
Cluster_Meis2	0.20176	0.431456	0.487	0.405	1	Cobll1
Cluster_Meis2	0.20899	0.386325	0.308	0.228	1	Prss35
Cluster_Meis2	0.212513	0.832559	0.385	0.308	1	Wfs1
Cluster_Meis2	0.213921	0.618351	0.359	0.289	1	Rorb
Cluster_Meis2	0.216493	0.613541	0.538	0.522	1	Cntn6
Cluster_Meis2	0.225363	-0.75932	0.179	0.267	1	Gucy1a1
Cluster_Meis2	0.231894	-0.542087	0.179	0.277	1	Carmn
Cluster_Meis2	0.234729	0.38695	0.487	0.436	1	Nrn1
Cluster_Meis2	0.249852	-0.629161	0.282	0.368	1	Nrep
Cluster_Meis2	0.269986	0.284764	0.718	0.66	1	Clmn
Cluster_Meis2	0.275458	0.985076	0.256	0.2	1	Pecam1
Cluster_Meis2	0.276571	-0.841303	0.231	0.297	1	Cdh9
Cluster_Meis2	0.308057	0.619789	0.282	0.222	1	Gli3
Cluster_Meis2	0.346891	-0.365561	0.282	0.362	1	Fhod3
Cluster_Meis2	0.436798	-0.445068	0.205	0.27	1	Tanc1
Cluster_Meis2	0.438113	0.272233	0.385	0.324	1	Necab1
Cluster_Meis2	0.442681	0.260462	0.308	0.262	1	Prox1
Cluster_Meis2	0.460415	0.377058	0.462	0.456	1	Syt2
Cluster_Meis2	0.5273	1.08359	0.282	0.267	1	Arc
Cluster_Meis2	0.559852	0.443364	0.564	0.588	1	Hpcal1
Cluster_Meis2	0.560098	-0.284557	0.256	0.297	1	Rnf152
Cluster_Meis2	0.564122	0.502223	0.462	0.446	1	Gjc3
Cluster_Meis2	0.609826	0.272376	0.333	0.31	1	Angpt1
Cluster_Meis2	0.653321	0.2644	0.256	0.246	1	Slit2
Cluster_Meis2	0.659457	0.381359	0.282	0.278	1	Opn3
Cluster_Meis2	0.761344	0.4326	0.308	0.292	1	Cpne4
Cluster_Meis2	0.773668	-0.61054	0.333	0.317	1	Pdgfra
Cluster_Meis2	0.785304	0.399138	0.282	0.321	1	Neto2
Cluster_Meis2	0.814993	0.558397	0.282	0.293	1	Sox10
Cluster_Meis2	0.820437	0.509815	0.436	0.536	1	Dpy19l1
Cluster_Meis2	0.829557	0.25757	0.41	0.44	1	Cpne6
Cluster_Oligodendrocytes	3.37e-65	-0.568481	0.483	0.626	8.35e-63	Zfp536
Cluster_Oligodendrocytes	5.63e-46	0.76913	0.368	0.248	1.4e-43	Grik3
Cluster_Oligodendrocytes	5.81e-38	0.562126	0.437	0.325	1.44e-35	Cntn6
Cluster_Oligodendrocytes	3.88e-31	-0.470362	0.347	0.462	9.62e-29	Gfap
Cluster_Oligodendrocytes	1.11e-24	0.504951	0.446	0.364	2.77e-22	Lyz2
Cluster_Oligodendrocytes	4.7e-24	0.702139	0.257	0.178	1.16e-21	Angpt1
Cluster_Oligodendrocytes	1.61e-12	0.474672	0.267	0.21	3.99e-10	Arhgap6
Cluster_Oligodendrocytes	7.62e-11	-0.312815	0.22	0.28	1.89e-08	Arhgef28
Cluster_Oligodendrocytes	1.51e-09	-0.28375	0.464	0.516	3.75e-07	Igfbp5
Cluster_OPCs	5.95e-20	0.549542	0.59	0.483	1.48e-17	Lyz2
Cluster_OPCs	9.7e-16	-0.537323	0.382	0.494	2.41e-13	Tmem132d
Cluster_OPCs	7.05e-13	0.632828	0.33	0.234	1.75e-10	Arhgap6
Cluster_OPCs	4.68e-12	-0.380068	0.498	0.595	1.16e-09	Cdh20
Cluster_OPCs	1.28e-11	-0.676667	0.481	0.555	3.18e-09	Cabp7
Cluster_OPCs	2.09e-11	0.330244	0.65	0.584	5.18e-09	Cntn6
Cluster_OPCs	4.01e-11	0.3299	0.728	0.664	9.94e-09	Grik3
Cluster_OPCs	4.15e-09	0.38616	0.637	0.596	1.03e-06	Ntsr2
Cluster_OPCs	1.49e-08	-0.433585	0.368	0.439	3.7e-06	Kctd12
Cluster_OPCs	4.15e-08	-0.464379	0.331	0.41	1.03e-05	Gfap
Cluster_OPCs	5.12e-08	-0.490611	0.33	0.405	1.27e-05	Zfp536
Cluster_OPCs	2.21e-07	-0.401667	0.212	0.282	5.49e-05	Pvalb
Cluster_OPCs	9.12e-07	-0.422647	0.258	0.323	0.00022611	Arhgef28
Cluster_OPCs	1.03e-06	-0.357945	0.359	0.425	0.00025663	Sipa1l3
Cluster_OPCs	2.17e-06	-0.251453	0.598	0.653	0.00053736	Gad1
Cluster_OPCs	2.19e-06	0.497157	0.316	0.26	0.00054277	Cdh4
Cluster_OPCs	2.24e-06	-0.297554	0.319	0.388	0.00055557	Tanc1
Cluster_OPCs	8.79e-06	-0.319028	0.508	0.556	0.00217888	Slc17a7
Cluster_OPCs	7.24e-05	-0.267537	0.308	0.368	0.0179627	Mapk4
Cluster_OPCs	0.00024853	0.359179	0.301	0.252	0.0616348	Rprm
Cluster_OPCs	0.00033023	-0.351924	0.22	0.268	0.0818975	Slc39a12
Cluster_OPCs	0.00036828	0.330357	0.346	0.3	0.0913344	Angpt1
Cluster_OPCs	0.00045978	-0.304658	0.304	0.349	0.114025	2010300C02Rik
Cluster_OPCs	0.00046848	0.270326	0.482	0.442	0.116182	Hpcal1
Cluster_OPCs	0.00388392	0.326669	0.268	0.231	0.963213	Calb1
Cluster_OPCs	0.00462793	0.337279	0.28	0.246	1	Tox
Cluster_OPCs	0.00555	0.251681	0.336	0.303	1	Kcnh5
Cluster_OPCs	0.0060696	0.258871	0.291	0.254	1	Shisa6
Cluster_OPCs	0.0116793	0.306684	0.399	0.379	1	Ppp1r1b
Cluster_OPCs	0.0225619	-0.257805	0.548	0.564	1	Arc
Cluster_OPCs	0.030444	0.320973	0.506	0.485	1	Calb2
Cluster_Pericytes	4.45e-20	0.666913	0.426	0.293	1.1e-17	Grik3
Cluster_Pericytes	2.51e-17	0.551188	0.452	0.329	6.22e-15	Cntn6
Cluster_Pericytes	2.68e-12	0.499849	0.356	0.259	6.65e-10	Arhgap6
Cluster_Pericytes	1.43e-10	-0.834226	0.316	0.396	3.54e-08	Ccn2
Cluster_Pericytes	5.79e-10	0.370605	0.553	0.46	1.43e-07	Pdzd2
Cluster_Pericytes	1.55e-09	0.333394	0.543	0.453	3.84e-07	Lyz2
Cluster_Pericytes	1.9e-09	-0.511066	0.547	0.59	4.71e-07	Acta2
Cluster_Pericytes	2.15e-09	0.464488	0.328	0.244	5.32e-07	Angpt1
Cluster_Pericytes	6.27e-09	0.420709	0.426	0.343	1.56e-06	Vwc2l
Cluster_Pericytes	1.11e-08	0.415924	0.445	0.365	2.76e-06	Inpp4b
Cluster_Pericytes	6.29e-08	-0.48577	0.326	0.397	1.56e-05	Kctd12
Cluster_Pericytes	6.66e-08	0.267536	0.51	0.424	1.65e-05	Chrm2
Cluster_Pericytes	1.78e-06	0.378569	0.282	0.219	0.00044052	Sntb1
Cluster_Pericytes	2.95e-06	0.288599	0.475	0.405	0.00073119	Bhlhe40
Cluster_Pericytes	6.94e-05	0.327772	0.344	0.291	0.0172209	Slfn5
Cluster_Pericytes	0.0001105	0.265104	0.51	0.459	0.0274049	Dkk3
Cluster_Pericytes	0.00049914	0.363374	0.292	0.248	0.123788	Ppp1r1b
Cluster_Pericytes	0.00061658	0.283422	0.308	0.264	0.152912	Adgrl4
Cluster_Pericytes	0.00093875	-0.290777	0.513	0.546	0.232809	Igf2
Cluster_Pericytes	0.00221393	-0.254858	0.512	0.539	0.549054	Nr2f2
Cluster_Pericytes	0.0119003	0.276596	0.277	0.248	1	Gfra2
Cluster_Pericytes	0.0163159	-0.346693	0.278	0.309	1	Mecom
Cluster_Pericytes	0.0285295	-0.443713	0.34	0.356	1	Cabp7
Cluster_Pvalb+ IN	1.57e-40	-0.393706	0.851	0.913	3.89e-38	Rims3
Cluster_Pvalb+ IN	1.31e-30	-0.307724	0.888	0.925	3.24e-28	Dner
Cluster_Pvalb+ IN	2.45e-23	-0.461551	0.514	0.63	6.09e-21	Thsd7a
Cluster_Pvalb+ IN	9.94e-22	-0.369582	0.778	0.812	2.47e-19	Rmst
Cluster_Pvalb+ IN	2.53e-20	0.7441	0.437	0.34	6.27e-18	Plch1
Cluster_Pvalb+ IN	3.12e-19	-0.706506	0.167	0.267	7.74e-17	Nxph3
Cluster_Pvalb+ IN	4e-19	0.386785	0.779	0.742	9.92e-17	Plcxd3
Cluster_Pvalb+ IN	6.54e-17	-0.418152	0.436	0.537	1.62e-14	Fhod3
Cluster_Pvalb+ IN	7.24e-16	-0.361502	0.49	0.59	1.79e-13	Kctd12
Cluster_Pvalb+ IN	8.37e-13	0.396667	0.546	0.477	2.08e-10	Lyz2
Cluster_Pvalb+ IN	2.16e-12	0.624175	0.262	0.187	5.36e-10	Lypd6
Cluster_Pvalb+ IN	4.33e-12	-0.495327	0.344	0.431	1.07e-09	Zfp536
Cluster_Pvalb+ IN	4.75e-11	0.537217	0.373	0.299	1.18e-08	Arhgap6
Cluster_Pvalb+ IN	7.82e-11	-0.263924	0.468	0.556	1.94e-08	Sipa1l3
Cluster_Pvalb+ IN	4.98e-08	-0.384247	0.222	0.287	1.23e-05	Slc39a12
Cluster_Pvalb+ IN	5.88e-08	-0.334474	0.273	0.341	1.46e-05	Syt17
Cluster_Pvalb+ IN	7.14e-08	0.86466	0.352	0.31	1.77e-05	Meis2
Cluster_Pvalb+ IN	1.76e-07	-0.450017	0.215	0.276	4.36e-05	Kctd8
Cluster_Pvalb+ IN	4.27e-07	-0.386581	0.216	0.275	0.00010598	Ndst4
Cluster_Pvalb+ IN	5.44e-07	-0.445353	0.206	0.262	0.00013486	Col19a1
Cluster_Pvalb+ IN	1.41e-06	-0.303326	0.465	0.523	0.00035067	Parm1
Cluster_Pvalb+ IN	1.77e-06	0.900688	0.275	0.235	0.00043843	Gfap
Cluster_Pvalb+ IN	1.91e-06	-0.28274	0.201	0.257	0.00047346	Stard5
Cluster_Pvalb+ IN	2.57e-06	-0.430175	0.412	0.476	0.0006376	Pdzd2
Cluster_Pvalb+ IN	0.00010771	0.373328	0.322	0.28	0.0267117	Tle4
Cluster_Pvalb+ IN	0.00015543	0.336661	0.46	0.434	0.0385467	Cpne6
Cluster_Pvalb+ IN	0.00064783	0.358234	0.323	0.288	0.160663	Angpt1
Cluster_Pvalb+ IN	0.00131467	0.433824	0.469	0.461	0.326037	Gfra2
Cluster_Pvalb+ IN	0.00215919	0.514581	0.35	0.329	0.53548	Wfs1
Cluster_Pvalb+ IN	0.984414	0.338822	0.263	0.269	1	Sncg
Cluster_Spp1+ neurons	1.23e-07	5.39632	0.333	0.03	3.06e-05	Rprm
Cluster_Spp1+ neurons	5.7e-07	-3.13351	0.333	0.994	0.00014132	Calb2
Cluster_Spp1+ neurons	8.62e-07	-11.7435	0	0.951	0.00021381	Slc17a7
Cluster_Spp1+ neurons	2.98e-06	-1.77285	0.778	0.996	0.0007387	Cabp7
Cluster_Spp1+ neurons	4.16e-06	-3.62243	0.222	0.943	0.00103073	Sema3e
Cluster_Spp1+ neurons	1.46e-05	3.98858	0.556	0.124	0.00362485	Opalin
Cluster_Spp1+ neurons	2.41e-05	3.84716	0.444	0.082	0.00597713	Tmem163
Cluster_Spp1+ neurons	4.29e-05	1.57386	1	0.69	0.0106336	Vwc2l
Cluster_Spp1+ neurons	0.00011192	3.03669	0.556	0.158	0.0277568	Arhgef28
Cluster_Spp1+ neurons	0.00012674	-9.66913	0	0.733	0.0314305	Nrn1
Cluster_Spp1+ neurons	0.00014313	3.93342	0.333	0.055	0.0354963	Cwh43
Cluster_Spp1+ neurons	0.00017951	3.53537	0.444	0.102	0.0445197	Nell1
Cluster_Spp1+ neurons	0.00027439	3.08154	0.667	0.264	0.0680485	Gjc3
Cluster_Spp1+ neurons	0.00035796	-9.96349	0	0.678	0.0887752	Vat1l
Cluster_Spp1+ neurons	0.00054017	2.73437	0.667	0.314	0.133962	Cux2
Cluster_Spp1+ neurons	0.00088667	-1.69305	0.333	0.927	0.219894	Plcxd3
Cluster_Spp1+ neurons	0.00110708	-8.96429	0	0.611	0.274557	Neto2
Cluster_Spp1+ neurons	0.00142107	3.21155	0.667	0.376	0.352425	Rims3
Cluster_Spp1+ neurons	0.0017315	-8.64216	0	0.582	0.429412	Gucy1a1
Cluster_Spp1+ neurons	0.00174057	-2.48337	0.111	0.743	0.431661	Nrep
Cluster_Spp1+ neurons	0.00217418	-8.67745	0	0.567	0.539196	Pip5k1b
Cluster_Spp1+ neurons	0.00394082	-8.38582	0	0.526	0.977323	Btbd11
Cluster_Spp1+ neurons	0.00413421	1.16622	0.889	0.867	1	Chrm2
Cluster_Spp1+ neurons	0.0065402	3.53518	0.333	0.095	1	Tmem132d
Cluster_Spp1+ neurons	0.00838787	1.02033	0.778	0.658	1	Arhgap12
Cluster_Spp1+ neurons	0.00955859	-1.41163	0.333	0.85	1	Nxph3
Cluster_Spp1+ neurons	0.0101214	-1.31086	0.444	0.874	1	Rnf152
Cluster_Spp1+ neurons	0.0112122	-8.07393	0	0.446	1	Cpne6
Cluster_Spp1+ neurons	0.0116211	-1.49403	0.222	0.786	1	Garnl3
Cluster_Spp1+ neurons	0.0135764	-7.89905	0	0.43	1	Syndig1
Cluster_Spp1+ neurons	0.0190954	-1.26899	0.111	0.613	1	Kcnh5
Cluster_Spp1+ neurons	0.0194482	-8.56274	0	0.399	1	Fos
Cluster_Spp1+ neurons	0.0205215	-1.55018	0.111	0.597	1	Syt6
Cluster_Spp1+ neurons	0.0215254	-1.50314	0.444	0.867	1	Unc13c
Cluster_Spp1+ neurons	0.0239236	-1.23658	0.556	0.853	1	Spp1
Cluster_Spp1+ neurons	0.0245331	-1.73515	0.111	0.57	1	Gsg1l
Cluster_Spp1+ neurons	0.0274884	2.28535	0.444	0.209	1	Sox10
Cluster_Spp1+ neurons	0.0275289	3.79463	0.333	0.127	1	Gad1
Cluster_Spp1+ neurons	0.0325669	2.14089	0.556	0.335	1	Clmn
Cluster_Spp1+ neurons	0.0401948	-7.51149	0	0.331	1	Epha4
Cluster_Spp1+ neurons	0.0425344	-7.34425	0	0.326	1	2010300C02Rik
Cluster_Spp1+ neurons	0.0477468	0.542736	0.889	0.818	1	Bhlhe40
Cluster_Spp1+ neurons	0.0498736	-7.48019	0	0.31	1	Hapln1
Cluster_Spp1+ neurons	0.0510406	-1.34775	0.111	0.511	1	Hat1
Cluster_Spp1+ neurons	0.0595991	2.18386	0.444	0.261	1	Prox1
Cluster_Spp1+ neurons	0.0610186	-7.19121	0	0.289	1	Neurod6
Cluster_Spp1+ neurons	0.0610954	-1.62946	0.111	0.477	1	Gfap
Cluster_Spp1+ neurons	0.0720587	-7.14762	0	0.272	1	Nwd2
Cluster_Spp1+ neurons	0.0731326	-0.965287	0.111	0.48	1	Bdnf
Cluster_Spp1+ neurons	0.0758551	-0.906393	0.333	0.774	1	Cntnap4
Cluster_Spp1+ neurons	0.0770102	0.963015	0.667	0.647	1	Sema6a
Cluster_Spp1+ neurons	0.0772934	2.93645	0.333	0.161	1	Dpyd
Cluster_Spp1+ neurons	0.0915564	2.07409	0.333	0.168	1	Thsd7a
Cluster_Spp1+ neurons	0.115347	-0.307564	0.444	0.858	1	Plcxd2
Cluster_Spp1+ neurons	0.116603	-0.659261	0.667	0.908	1	Pvalb
Cluster_Spp1+ neurons	0.1394	-1.09741	0.111	0.394	1	Meis2
Cluster_Spp1+ neurons	0.141926	-0.611218	0.222	0.584	1	Kctd12
Cluster_Spp1+ neurons	0.149767	-0.572688	0.444	0.875	1	Tanc1
Cluster_Spp1+ neurons	0.151553	-0.503282	0.111	0.398	1	Wfs1
Cluster_Spp1+ neurons	0.157862	0.908372	0.667	0.766	1	Grik3
Cluster_Spp1+ neurons	0.16128	-0.595134	0.556	0.925	1	Zfp536
Cluster_Spp1+ neurons	0.178366	-0.852526	0.222	0.533	1	Sema3a
Cluster_Spp1+ neurons	0.18539	1.92957	0.444	0.361	1	Parm1
Cluster_Spp1+ neurons	0.202213	-0.351815	0.222	0.563	1	Sdk2
Cluster_Spp1+ neurons	0.218947	1.71136	0.333	0.222	1	Gng12
Cluster_Spp1+ neurons	0.232784	-0.731927	0.222	0.489	1	Lamp5
Cluster_Spp1+ neurons	0.239796	-0.739366	0.111	0.325	1	Car4
Cluster_Spp1+ neurons	0.253255	0.803845	0.556	0.579	1	Mapk4
Cluster_Spp1+ neurons	0.333014	1.71024	0.333	0.269	1	Arhgap6
Cluster_Spp1+ neurons	0.349541	-0.339598	0.333	0.622	1	Ppp1r1b
Cluster_Spp1+ neurons	0.355906	1.47377	0.444	0.441	1	Dpy19l1
Cluster_Spp1+ neurons	0.377015	1.46082	0.333	0.275	1	Igfbp4
Cluster_Spp1+ neurons	0.38253	1.45388	0.444	0.456	1	Cntn6
Cluster_Spp1+ neurons	0.406793	1.61272	0.333	0.291	1	Kcnmb2
Cluster_Spp1+ neurons	0.418829	1.72913	0.111	0.261	1	Slit2
Cluster_Spp1+ neurons	0.427208	-0.401482	0.556	0.865	1	Arc
Cluster_Spp1+ neurons	0.436189	0.858359	0.444	0.485	1	Gm2115
Cluster_Spp1+ neurons	0.439669	1.51539	0.333	0.304	1	Stard5
Cluster_Spp1+ neurons	0.509708	0.316681	0.222	0.418	1	Necab2
Cluster_Spp1+ neurons	0.527757	0.31423	0.222	0.412	1	Deptor
Cluster_Spp1+ neurons	0.707612	0.516976	0.444	0.693	1	Pdzd2
Cluster_Spp1+ neurons	0.713933	0.930041	0.444	0.599	1	Cdh20
Cluster_Spp1+ neurons	0.778629	0.815207	0.333	0.388	1	Rasgrf2
Cluster_Spp1+ neurons	0.809266	0.689985	0.333	0.392	1	Cobll1
Cluster_Spp1+ neurons	0.814073	1.16062	0.556	0.852	1	Acsbg1
Cluster_Spp1+ neurons	0.816882	0.589416	0.333	0.515	1	Pkib
Cluster_Spp1+ neurons	0.828005	-0.290083	0.667	0.732	1	Aqp4
Cluster_Spp1+ neurons	0.838002	0.447859	0.444	0.61	1	Ntsr2
Cluster_Spp1+ neurons	0.842948	0.59097	0.444	0.514	1	Rmst
Cluster_Spp1+ neurons	0.874879	0.780038	0.333	0.43	1	Adamts2
Cluster_Spp1+ neurons	0.944713	0.86106	0.222	0.26	1	Angpt1
Cluster_Spp1+ neurons	0.963429	1.12504	0.333	0.48	1	Sipa1l3
Cluster_Spp1+ neurons	0.993572	0.666914	0.333	0.439	1	Gad2
Cluster_Sst+ IN	1.81e-33	0.972049	0.481	0.302	4.48e-31	Arhgap6
Cluster_Sst+ IN	1.28e-26	0.559504	0.718	0.597	3.16e-24	Lyz2
Cluster_Sst+ IN	8.41e-18	-0.997325	0.189	0.312	2.08e-15	Gfap
Cluster_Sst+ IN	3.02e-13	-0.297027	0.871	0.909	7.48e-11	Rims3
Cluster_Sst+ IN	1.77e-12	-0.385528	0.674	0.753	4.4e-10	Zfp536
Cluster_Sst+ IN	2.67e-12	0.536007	0.38	0.277	6.63e-10	Angpt1
Cluster_Sst+ IN	7.09e-12	-0.494235	0.572	0.645	1.76e-09	Kctd12
Cluster_Sst+ IN	2.45e-10	0.304265	0.757	0.694	6.08e-08	Cntn6
Cluster_Sst+ IN	2.58e-10	-0.295946	0.749	0.801	6.4e-08	Kcnmb2
Cluster_Sst+ IN	5.33e-10	-0.765736	0.542	0.602	1.32e-07	Cabp7
Cluster_Sst+ IN	1.99e-09	-0.576102	0.2	0.289	4.94e-07	Slc39a12
Cluster_Sst+ IN	3.07e-09	0.287302	0.853	0.808	7.62e-07	Dkk3
Cluster_Sst+ IN	1.24e-07	-0.36678	0.468	0.554	3.06e-05	Plcxd2
Cluster_Sst+ IN	1.95e-07	0.609672	0.312	0.242	4.84e-05	Unc13c
Cluster_Sst+ IN	1.98e-07	-0.517313	0.307	0.391	4.91e-05	Mapk4
Cluster_Sst+ IN	2.07e-07	-0.530067	0.348	0.418	5.14e-05	Nr2f2
Cluster_Sst+ IN	8.49e-07	-0.370336	0.575	0.626	0.00021047	Tmem132d
Cluster_Sst+ IN	1.13e-05	-0.536069	0.246	0.306	0.0028055	Tmem255a
Cluster_Sst+ IN	2.89e-05	-0.267257	0.51	0.569	0.00716739	Fhod3
Cluster_Sst+ IN	3.16e-05	-0.407315	0.194	0.255	0.00783691	Arhgef28
Cluster_Sst+ IN	6.08e-05	-0.48602	0.25	0.31	0.0150683	Sdk2
Cluster_Sst+ IN	8.09e-05	0.375205	0.257	0.2	0.0200607	Penk
Cluster_Sst+ IN	0.00012215	0.260062	0.629	0.594	0.030293	Bhlhe40
Cluster_Sst+ IN	0.00025813	0.413139	0.277	0.227	0.064017	Tox
Cluster_Sst+ IN	0.00039773	0.293177	0.354	0.302	0.0986371	Galnt14
Cluster_Sst+ IN	0.00073747	0.318928	0.441	0.4	0.182892	Syt17
Cluster_Sst+ IN	0.0008544	0.289978	0.279	0.23	0.211891	Igf1
Cluster_Sst+ IN	0.00193695	-0.337577	0.542	0.569	0.480363	Necab2
Cluster_Sst+ IN	0.00567825	-0.325682	0.569	0.608	1	Clmn
Cluster_Sst+ IN	0.0139686	0.300236	0.295	0.264	1	Rorb
Cluster_Sst+ IN	0.0271207	0.256497	0.431	0.415	1	Cdh4
Cluster_Sst+ IN	0.0277171	0.274218	0.266	0.236	1	Nxph3
Cluster_Sst+ IN	0.247088	0.300151	0.281	0.267	1	Calb2
Cluster_VIP Interneurons	3.61e-25	0.867669	0.518	0.334	8.96e-23	Arhgap6
Cluster_VIP Interneurons	1.19e-21	-0.427997	0.868	0.9	2.95e-19	Rims3
Cluster_VIP Interneurons	6.89e-19	0.524685	0.71	0.585	1.71e-16	Lyz2
Cluster_VIP Interneurons	1.97e-13	0.302345	0.686	0.548	4.89e-11	Grik3
Cluster_VIP Interneurons	9.67e-13	0.422486	0.753	0.636	2.4e-10	Cntn6
Cluster_VIP Interneurons	1.84e-10	0.637313	0.342	0.223	4.57e-08	Kcnh5
Cluster_VIP Interneurons	2.42e-10	0.533412	0.431	0.313	6.01e-08	Angpt1
Cluster_VIP Interneurons	3e-08	0.489633	0.402	0.299	7.45e-06	Cdh4
Cluster_VIP Interneurons	3.54e-08	0.424786	0.537	0.44	8.77e-06	Chrm2
Cluster_VIP Interneurons	7.46e-08	0.370771	0.694	0.602	1.85e-05	Prox1
Cluster_VIP Interneurons	1.48e-05	-0.271339	0.807	0.792	0.0036593	Zfp536
Cluster_VIP Interneurons	2.14e-05	-0.383967	0.774	0.792	0.00530073	Arc
Cluster_VIP Interneurons	5.27e-05	0.466565	0.468	0.396	0.0130572	Calb2
Cluster_VIP Interneurons	9.68e-05	-0.319901	0.638	0.676	0.0240025	Kctd12
Cluster_VIP Interneurons	0.00015246	0.291304	0.498	0.432	0.0378089	Ppp1r1b
Cluster_VIP Interneurons	0.00016612	0.359626	0.432	0.359	0.0411984	Wfs1
Cluster_VIP Interneurons	0.00025562	0.370691	0.489	0.424	0.0633943	Penk
Cluster_VIP Interneurons	0.00057275	-0.284095	0.669	0.682	0.142041	Nr2f2
Cluster_VIP Interneurons	0.00075701	-0.381632	0.56	0.585	0.18774	Rab3b
Cluster_VIP Interneurons	0.00110522	-0.276072	0.799	0.81	0.274094	Slc17a7
Cluster_VIP Interneurons	0.0026612	0.307059	0.257	0.207	0.659977	Cpne8
Cluster_VIP Interneurons	0.00609204	-0.531193	0.309	0.348	1	Gfap
Cluster_VIP Interneurons	0.00823421	-0.457173	0.271	0.317	1	Neto2
Cluster_VIP Interneurons	0.00954227	-0.388006	0.595	0.626	1	Meis2
Cluster_VIP Interneurons	0.0119301	-0.317706	0.517	0.542	1	Plcxd2
Cluster_VIP Interneurons	0.0129837	-0.346231	0.305	0.342	1	Tmem132d
Cluster_VIP Interneurons	0.0201215	-0.327087	0.349	0.389	1	Arhgef28
Cluster_VIP Interneurons	0.0269151	-0.335703	0.433	0.46	1	Mapk4
Cluster_VIP Interneurons	0.0344636	-0.307221	0.486	0.504	1	Cabp7
Cluster_VIP Interneurons	0.0606336	-0.360683	0.355	0.38	1	Nrep
Cluster_VIP Interneurons	0.0636513	-0.263886	0.478	0.496	1	2010300C02Rik
Cluster_VIP Interneurons	0.0686924	-0.257367	0.314	0.344	1	Epha4
Cluster_VIP Interneurons	0.0793525	-0.368116	0.369	0.387	1	Cntnap4
Cluster_VIP Interneurons	0.116496	-0.391187	0.265	0.292	1	Fhod3
Cluster_VIP Interneurons	0.234208	-0.261484	0.379	0.39	1	Sdk2
Cluster_VLMC	3.84e-43	-0.856577	0.448	0.588	9.53e-41	Ccn2
Cluster_VLMC	4.48e-43	0.731289	0.465	0.303	1.11e-40	Grik3
Cluster_VLMC	8.96e-35	-0.448936	0.855	0.881	2.22e-32	Igf2
Cluster_VLMC	4.96e-27	0.472046	0.555	0.436	1.23e-24	Ntsr2
Cluster_VLMC	2.6e-21	0.364334	0.55	0.439	6.44e-19	Cntn6
Cluster_VLMC	5.03e-21	0.609749	0.415	0.305	1.25e-18	Sema6a
Cluster_VLMC	1.6e-20	-0.63411	0.43	0.513	3.97e-18	Mapk4
Cluster_VLMC	3.46e-20	0.669908	0.254	0.157	8.59e-18	Id2
Cluster_VLMC	8.98e-19	0.48169	0.526	0.415	2.23e-16	Aqp4
Cluster_VLMC	9.85e-17	-0.656129	0.181	0.268	2.44e-14	Rbp4
Cluster_VLMC	1.85e-15	0.604471	0.302	0.214	4.59e-13	Slfn5
Cluster_VLMC	4.27e-14	0.395071	0.328	0.234	1.06e-11	Pglyrp1
Cluster_VLMC	7.33e-12	0.331252	0.375	0.29	1.82e-09	Angpt1
Cluster_VLMC	4.43e-11	0.408407	0.55	0.483	1.1e-08	Gjb2
Cluster_VLMC	5.4e-11	0.523672	0.322	0.246	1.34e-08	Ly6a
Cluster_VLMC	2.01e-09	-0.553221	0.213	0.273	4.98e-07	Zfp536
Cluster_VLMC	7.31e-09	-0.363312	0.48	0.545	1.81e-06	Igfbp6
Cluster_VLMC	8.95e-09	0.276066	0.335	0.265	2.22e-06	Arhgap6
Cluster_VLMC	9.63e-06	0.300413	0.336	0.284	0.00238815	Cobll1
Cluster_VLMC	3.64e-05	0.301298	0.251	0.207	0.00903902	Cd93
Cluster_VLMC	6.16e-05	-0.25828	0.515	0.55	0.0152701	Nr2f2
Cluster_VLMC	0.00012559	0.384632	0.282	0.239	0.0311465	Ppp1r1b
Cluster_VLMC	0.00162338	-0.430274	0.263	0.292	0.402598	Vwc2l
