# Supplementary material for: Size-dependent plastic exposure disrupts macrophage function and tissue-specific metabolism
Source: Research Square preprint supplement (doi:10.21203/rs.3.rs-6204281/v1), 2025-03-18
Supplement: Supplementary file 5 [file edec30f61d6c8108d3e1c0ff.xlsx]

## Sheet: DEGs_Hepatocytes_NP_vs_Ctrl
	p_val	avg_log2FC	pct.1	pct.2	p_val_adj
Bhmt	0	2.85547	0.865	0.425	0
Gm15622	0	2.92064	0.537	0.128	0
Selenbp2	0	-2.40259	0.429	0.838	0
Fam13a	0	1.78208	0.652	0.29	0
Gm34667	0	1.45233	0.794	0.465	0
Mat1a	0	1.40481	0.976	0.82	0
Gm26917	0	-1.4601	0.795	0.944	0
Apoa2	0	1.19052	0.971	0.859	0
Atxn1	0	-1.32738	0.903	0.981	0
Cyp7b1	0	-2.07787	0.915	0.99	0
Egfr	0	-1.20862	0.983	0.999	0
Neat1	0	-0.651001	0.995	0.996	0
Zbtb20	1.54872e-304	-0.515277	0.996	0.996	1.23046e-300
Dmgdh	1.01159e-297	1.76597	0.67	0.346	8.0371e-294
C6	1.06425e-286	-0.87841	0.889	0.969	8.45547e-283
Upp2	3.40173e-277	1.24051	0.884	0.698	2.70267e-273
Dlc1	9.299e-270	1.35813	0.77	0.493	7.38805e-266
Gm47283	8.46274e-268	-0.940738	0.732	0.917	6.72365e-264
Cth	1.48579e-263	1.78297	0.717	0.427	1.18046e-259
Fgg	5.21042e-262	1.06777	0.892	0.71	4.13968e-258
Retreg1	8.04751e-260	1.9905	0.517	0.184	6.39375e-256
Nfib	4.2499e-253	0.855482	0.93	0.838	3.37655e-249
Zbtb7c	1.03902e-249	-1.52437	0.461	0.719	8.25498e-246
Alb	1.16795e-244	0.64836	1	0.985	9.27933e-241
Gm42418	2.38461e-244	-0.909791	0.994	0.999	1.89458e-240
Ctsl	4.35325e-233	1.6579	0.617	0.317	3.45865e-229
Bach2	8.94966e-231	-1.28292	0.588	0.806	7.11051e-227
Gnmt	3.36108e-229	0.803152	0.96	0.895	2.67038e-225
Abcc3	3.05919e-228	1.90375	0.484	0.175	2.43053e-224
4930517O19Rik	7.61949e-226	1.6188	0.569	0.257	6.05368e-222
Kng2	1.76024e-225	1.09376	0.787	0.552	1.39851e-221
Fgb	1.26897e-224	0.97133	0.921	0.784	1.0082e-220
Ces1f	1.10537e-223	1.40929	0.62	0.301	8.78216e-220
Nudt7	8.92126e-220	-0.911073	0.756	0.9	7.08794e-216
Cdo1	5.08678e-218	0.846865	0.889	0.653	4.04145e-214
Apoa1	9.16367e-215	0.728957	0.982	0.922	7.28053e-211
Malat1	5.00004e-214	0.333549	1	1	3.97253e-210
C4a	6.54781e-212	-1.93012	0.253	0.541	5.20223e-208
Lrrc28	5.32563e-207	-1.17091	0.606	0.805	4.23121e-203
Sult1a1	2.63324e-204	1.46614	0.591	0.296	2.09211e-200
Rgs16	6.10667e-203	1.85055	0.476	0.187	4.85175e-199
Taco1	3.92486e-202	-2.39464	0.142	0.41	3.1183e-198
Ttc39c	1.05655e-199	-0.586534	0.986	0.994	8.39432e-196
Angptl8	7.0683e-199	-1.77127	0.222	0.51	5.61576e-195
Sorbs2os	5.45288e-196	1.28839	0.64	0.363	4.33231e-192
Ahsg	4.64877e-195	0.563628	0.991	0.968	3.69345e-191
Ttr	5.75511e-195	0.71032	0.983	0.905	4.57244e-191
Apoe	3.72077e-194	0.816022	0.96	0.866	2.95615e-190
Tkfc	1.79709e-190	-1.26737	0.521	0.737	1.42779e-186
Errfi1	3.34125e-189	0.337832	0.998	0.999	2.65462e-185
Trf	4.70501e-189	0.779386	0.973	0.884	3.73813e-185
Igfbp1	3.02608e-187	1.24863	0.629	0.34	2.40422e-183
Fign	3.15067e-186	1.60614	0.508	0.233	2.50321e-182
Etfbkmt	1.3025e-185	-1.10766	0.424	0.696	1.03484e-181
Zfp385b	1.57261e-184	1.05392	0.715	0.486	1.24944e-180
Pcx	7.25227e-183	0.848897	0.845	0.682	5.76193e-179
Chn2	1.12688e-179	1.00188	0.75	0.536	8.95308e-176
Hc	2.32451e-175	-0.809719	0.881	0.943	1.84682e-171
Arid5b	6.71972e-174	0.556399	0.969	0.922	5.33882e-170
Hao1	1.61877e-172	-0.667938	0.821	0.928	1.28611e-168
Gm20528	1.6221e-172	0.665932	0.9	0.679	1.28876e-168
Akr1d1	3.42332e-172	1.41551	0.545	0.279	2.71982e-168
Pid1	2.39653e-168	0.526611	0.984	0.972	1.90404e-164
Pah	1.12355e-165	0.765307	0.92	0.822	8.92663e-162
Fads2	1.87468e-165	-1.00705	0.635	0.803	1.48943e-161
Itih3	4.29334e-165	-1.03542	0.722	0.853	3.41106e-161
Dhtkd1	2.07702e-163	0.991228	0.706	0.485	1.65019e-159
Ptprd	5.69597e-162	0.416566	0.989	0.986	4.52544e-158
Slco1b2	3.02201e-161	0.711741	0.902	0.722	2.40099e-157
Bhmt2	7.23131e-159	1.15739	0.617	0.37	5.74527e-155
Sult5a1	1.49521e-156	-2.04293	0.146	0.384	1.18794e-152
Arhgef37	5.65327e-156	1.77381	0.376	0.135	4.49152e-152
Cyp4a14	2.12265e-154	2.61065	0.296	0.081	1.68644e-150
Mgst1	8.73456e-154	0.758596	0.882	0.743	6.93961e-150
Car3	9.00149e-154	1.28829	0.618	0.367	7.15168e-150
Scp2	1.12393e-149	-0.448682	0.971	0.992	8.92962e-146
Cyp3a25	4.74964e-148	0.805517	0.922	0.843	3.77359e-144
Mug2	1.99156e-147	0.731706	0.911	0.837	1.5823e-143
Etv6	8.92282e-147	-0.845785	0.638	0.793	7.08918e-143
Mid1	1.22505e-146	-1.42519	0.108	0.338	9.733e-143
C4b	1.48406e-144	-1.32817	0.38	0.601	1.17908e-140
Epb41	2.16492e-144	-0.619181	0.815	0.908	1.72003e-140
0610005C13Rik	6.37746e-144	0.812483	0.775	0.579	5.06689e-140
Slco1a4	9.85015e-144	1.92506	0.356	0.131	7.82595e-140
Ctif	2.69551e-142	-0.735226	0.724	0.838	2.14158e-138
Noct	2.0794e-140	-0.97274	0.47	0.686	1.65208e-136
Gsta3	1.65116e-138	0.790721	0.734	0.475	1.31185e-134
Lrrc4	2.12528e-138	0.894322	0.715	0.488	1.68854e-134
Abcb4	3.29724e-137	-0.494813	0.921	0.969	2.61965e-133
Pon1	6.27196e-136	1.42152	0.459	0.224	4.98307e-132
AY036118	2.54829e-134	-0.511809	0.954	0.977	2.02462e-130
Man2a1	8.94664e-134	-0.498856	0.921	0.953	7.1081e-130
Scd1	2.04401e-133	1.32592	0.439	0.199	1.62396e-129
Slc16a7	4.63911e-132	1.79037	0.339	0.126	3.68577e-128
Slc17a4	2.88191e-130	1.68439	0.328	0.116	2.28968e-126
Mlxipl	4.00521e-130	-0.528553	0.957	0.977	3.18214e-126
Cyp8b1	1.7925e-129	1.51518	0.386	0.163	1.42414e-125
Vmp1	3.72538e-129	-0.575435	0.842	0.917	2.95981e-125
Gadd45g	1.04461e-128	1.10569	0.613	0.385	8.29941e-125
Slc38a4	3.77928e-127	0.519781	0.978	0.933	3.00264e-123
Kng1	4.33492e-126	0.682317	0.86	0.728	3.44409e-122
Ankrd17	1.75098e-125	-0.538177	0.85	0.917	1.39116e-121
B630019A10Rik	1.66875e-124	0.828583	0.694	0.48	1.32582e-120
Adcy9	6.63094e-124	0.679971	0.806	0.677	5.26828e-120
Ppp1r3g	1.30007e-123	3.46403	0.166	0.02	1.0329e-119
Fga	3.56725e-123	0.849827	0.808	0.664	2.83418e-119
H3f3b	4.60578e-123	1.47897	0.572	0.368	3.65929e-119
Abat	7.18093e-123	1.26409	0.457	0.232	5.70525e-119
Pcyt2	1.90215e-122	-0.487164	0.948	0.98	1.51126e-118
Rapgef4	2.82108e-120	-0.348183	0.98	0.992	2.24134e-116
Gm35188	8.78681e-120	0.700302	0.789	0.593	6.98112e-116
Cabyr	2.33098e-117	-1.43167	0.223	0.431	1.85196e-113
Cpeb2	3.15232e-117	0.624163	0.88	0.792	2.50452e-113
Ctcflos	4.62376e-117	-0.841778	0.645	0.782	3.67357e-113
Fkbp5	6.12826e-117	0.811167	0.73	0.547	4.8689e-113
Gucd1	1.18965e-116	0.616594	0.829	0.679	9.45173e-113
Nfia	2.38674e-116	0.43699	0.978	0.973	1.89627e-112
Ttpa	7.10714e-114	0.721781	0.77	0.627	5.64662e-110
Ahcy	1.51437e-113	0.881236	0.655	0.473	1.20317e-109
Sdc4	2.49963e-113	0.667081	0.843	0.724	1.98595e-109
Gm47818	2.70705e-113	1.80677	0.255	0.076	2.15075e-109
Rnf125	5.07688e-112	1.18696	0.502	0.294	4.03358e-108
Ddah1	1.43347e-111	0.904131	0.599	0.388	1.13889e-107
Pde4d	3.7528e-110	0.734618	0.808	0.695	2.9816e-106
Gulp1	6.17057e-110	-5.15949	0.007	0.121	4.90252e-106
Hpd	6.4649e-110	0.65477	0.892	0.778	5.13637e-106
Gm13944	5.0961e-109	1.40196	0.358	0.155	4.04885e-105
Tsku	6.27294e-109	-1.87821	0.12	0.303	4.98385e-105
Crp	7.96015e-109	0.605324	0.851	0.742	6.32434e-105
Dpys	1.05559e-108	0.601258	0.852	0.716	8.38663e-105
Tdo2	9.58649e-108	0.492616	0.973	0.906	7.61647e-104
Acaca	1.33854e-107	-0.529979	0.893	0.934	1.06347e-103
Mug1	1.75885e-107	0.484956	0.995	0.986	1.39741e-103
Trp53inp1	8.40639e-106	0.815692	0.727	0.563	6.67888e-102
Ppp2r5e	4.52091e-105	-0.534408	0.859	0.917	3.59186e-101
Klf12	8.05092e-105	0.513609	0.918	0.864	6.39645e-101
Zfand3	1.46093e-104	-0.499764	0.85	0.917	1.16071e-100
Slc22a30	1.89951e-104	-0.389018	0.965	0.975	1.50916e-100
Rasal2	6.94025e-101	-0.928537	0.423	0.612	5.51403e-97
Abcd3	7.78391e-101	-0.504588	0.855	0.907	6.18431e-97
Gm31356	8.65126e-100	0.810093	0.642	0.432	6.87342e-96
Rsrp1	8.73653e-100	0.414667	0.964	0.923	6.94117e-96
Dapk1	1.05944e-99	0.636125	0.799	0.65	8.41728e-96
Hamp	1.63535e-99	1.52239	0.555	0.368	1.29929e-95
Ces3b	2.32175e-99	-0.668291	0.642	0.798	1.84463e-95
Spata5	2.65758e-99	-1.0839	0.259	0.461	2.11144e-95
Map3k5	7.49318e-98	0.508909	0.878	0.799	5.95333e-94
Slc25a30	8.58865e-98	-1.35862	0.215	0.406	6.82368e-94
D5Ertd579e	3.2683e-97	-0.787631	0.54	0.695	2.59667e-93
Nfil3	7.47247e-97	1.29849	0.376	0.186	5.93688e-93
Itih2	9.01343e-97	0.721805	0.712	0.55	7.16117e-93
Psmd9	3.84656e-96	0.855609	0.628	0.441	3.0561e-92
Mtss1	1.41173e-95	-0.319986	0.985	0.989	1.12162e-91
Gm16193	2.0308e-94	0.999291	0.488	0.288	1.61347e-90
Arl4a	3.83161e-93	1.16142	0.42	0.229	3.04422e-89
Gm31121	8.96405e-93	1.34648	0.372	0.188	7.12194e-89
Nlrp6	2.79241e-92	-0.799361	0.506	0.674	2.21857e-88
Cyp4a10	1.69623e-91	1.75214	0.263	0.099	1.34766e-87
Ppm1k	2.39735e-91	0.932581	0.469	0.269	1.9047e-87
Camk1d	3.06753e-91	0.394163	0.962	0.936	2.43715e-87
Slc17a8	1.13198e-90	1.68745	0.253	0.093	8.99357e-87
Rdh7	1.66945e-90	0.462306	0.917	0.853	1.32638e-86
Btg2	4.32602e-90	2.14509	0.201	0.059	3.43702e-86
Eif1	1.01262e-89	0.848971	0.597	0.409	8.04526e-86
Plcl1	1.23092e-89	-2.50058	0.045	0.176	9.77965e-86
Insig1	2.15999e-88	0.795179	0.698	0.547	1.71611e-84
Dpyd	2.28722e-88	-0.235152	0.996	0.998	1.8172e-84
Shb	5.7227e-87	-0.720572	0.625	0.748	4.54668e-83
Ext1	5.80114e-87	-0.553542	0.911	0.941	4.60901e-83
Acss3	1.44489e-86	1.0268	0.44	0.252	1.14796e-82
Ddc	4.57843e-86	-1.06009	0.522	0.656	3.63757e-82
Clpx	8.88223e-86	0.551354	0.864	0.796	7.05694e-82
Cobl	1.12623e-85	-1.01421	0.34	0.519	8.94789e-82
Ccdc141	1.41617e-85	0.983102	0.492	0.309	1.12515e-81
Zfp608	1.46999e-85	1.90636	0.193	0.056	1.16791e-81
Zfp36l1	1.81915e-85	0.769583	0.703	0.55	1.44532e-81
Onecut1	1.86781e-85	-0.805183	0.423	0.613	1.48398e-81
Selenop	3.59632e-85	0.449626	0.944	0.882	2.85728e-81
Dcaf6	3.80798e-85	0.710588	0.712	0.572	3.02544e-81
Rida	8.63935e-85	0.852748	0.622	0.471	6.86397e-81
Stard5	3.95975e-84	0.828357	0.595	0.423	3.14602e-80
Tmcc1	4.96446e-84	-0.414997	0.873	0.927	3.94426e-80
Tulp2	8.60909e-84	1.15521	0.367	0.188	6.83992e-80
Upb1	1.12332e-83	0.689197	0.684	0.536	8.92476e-80
Cyp2c70	2.55007e-83	-1.22824	0.453	0.592	2.02603e-79
Zpr1	1.16148e-82	-0.899584	0.325	0.508	9.22797e-79
Mpp4	1.48241e-81	-1.3858	0.114	0.27	1.17778e-77
Cyp2c68	2.3206e-81	0.866894	0.393	0.208	1.84372e-77
Mpc1	1.24213e-80	1.16638	0.346	0.172	9.86871e-77
Kcnn2	1.57388e-80	0.564272	0.778	0.642	1.25045e-76
Tcim	5.97308e-80	0.690321	0.636	0.436	4.74561e-76
Irs2	1.11123e-79	1.32616	0.295	0.134	8.82876e-76
Car8	1.15867e-79	1.12399	0.384	0.209	9.20564e-76
Gm36041	1.23914e-79	0.984381	0.443	0.259	9.84496e-76
Abca8a	2.93893e-79	1.02671	0.451	0.275	2.33498e-75
Papss2	7.11673e-79	1.16215	0.361	0.19	5.65424e-75
Garem1	1.16008e-78	0.58591	0.799	0.707	9.21687e-75
Pfkfb1	1.81906e-78	0.824921	0.549	0.377	1.44524e-74
Nsd3	4.2258e-78	-0.383869	0.867	0.927	3.3574e-74
Apoh	6.71975e-78	0.761126	0.631	0.464	5.33884e-74
Abcc2	8.89146e-78	0.343011	0.975	0.953	7.06427e-74
Tle4	9.96286e-78	-0.729315	0.549	0.687	7.9155e-74
Cyb5a	1.70355e-77	0.567069	0.762	0.626	1.35347e-73
Ces1d	4.7145e-77	1.07	0.363	0.19	3.74567e-73
Prr16	9.32158e-77	0.35191	0.977	0.966	7.406e-73
Me1	1.49345e-76	-0.616353	0.636	0.765	1.18654e-72
Dhdh	2.68676e-76	0.772153	0.556	0.388	2.13463e-72
Nf1	4.86698e-76	-0.536855	0.681	0.785	3.86682e-72
Adam22	7.20376e-76	-2.38303	0.048	0.166	5.72338e-72
Tmem82	1.53e-75	-1.32784	0.15	0.307	1.21559e-71
Mrtfa	1.76601e-74	-0.900046	0.325	0.492	1.4031e-70
Fabp1	8.68912e-74	0.45864	0.973	0.916	6.90351e-70
Fmo1	1.86799e-73	0.931223	0.433	0.261	1.48412e-69
Nav2	1.87152e-73	0.67644	0.686	0.548	1.48692e-69
Pck1	3.60299e-73	0.272948	0.975	0.975	2.86258e-69
Afmid	4.77289e-73	1.22072	0.301	0.144	3.79206e-69
Osgin1	6.00929e-73	-1.62321	0.129	0.276	4.77438e-69
Dpp4	6.97305e-73	0.704023	0.621	0.461	5.54009e-69
Gpi1	8.82472e-73	-1.0114	0.265	0.43	7.01124e-69
Rrbp1	1.01603e-72	-0.485153	0.767	0.849	8.07232e-69
Mfsd2a	1.40523e-72	-0.687096	0.558	0.695	1.11646e-68
Col18a1	1.84177e-72	0.39616	0.908	0.853	1.46328e-68
Map2k6	2.37662e-72	1.80705	0.186	0.062	1.88822e-68
Shtn1	2.40318e-72	-0.731547	0.473	0.623	1.90933e-68
Mgll	2.83427e-72	-0.611604	0.601	0.733	2.25183e-68
Il6ra	8.41246e-72	0.52621	0.774	0.653	6.6837e-68
Gigyf2	8.63038e-72	-0.460781	0.782	0.854	6.85683e-68
Plppr1	9.17784e-72	1.85752	0.176	0.055	7.29179e-68
Apoc3	1.7171e-71	0.585194	0.869	0.772	1.36424e-67
Necab1	2.02276e-71	0.618449	0.726	0.589	1.60708e-67
Gm48877	3.89482e-71	1.4114	0.244	0.102	3.09444e-67
Fnip2	3.97724e-71	0.735345	0.604	0.446	3.15991e-67
Glud1	1.17126e-70	-0.446718	0.875	0.915	9.30563e-67
Ppp1r3b	1.41752e-70	-0.434278	0.866	0.916	1.12622e-66
Amdhd1	4.94312e-70	0.775613	0.642	0.521	3.92731e-66
B430010I23Rik	6.0537e-70	0.835091	0.51	0.336	4.80966e-66
Arl4d	6.68487e-70	1.09976	0.35	0.191	5.31113e-66
Zfp36	6.90038e-70	0.748727	0.587	0.424	5.48235e-66
Cmss1	8.16434e-70	-0.670197	0.679	0.789	6.48657e-66
Fchsd2	1.48434e-69	0.601454	0.758	0.636	1.17931e-65
Ccnl2	1.50096e-69	-0.459892	0.746	0.841	1.19251e-65
Gm11342	1.74719e-69	0.490718	0.782	0.618	1.38814e-65
Fam214a	1.80813e-69	0.39258	0.95	0.924	1.43656e-65
Slc25a13	6.60799e-69	0.297182	0.972	0.954	5.25004e-65
Cmbl	1.82324e-68	1.21772	0.276	0.129	1.44856e-64
F11	1.87876e-68	0.817135	0.526	0.363	1.49268e-64
C9	2.2013e-68	-0.852462	0.619	0.707	1.74893e-64
Nox4	2.35952e-68	0.701175	0.618	0.462	1.87464e-64
Tat	4.12633e-68	0.308519	0.978	0.949	3.27837e-64
Aass	4.35126e-68	0.706632	0.868	0.801	3.45707e-64
Cluh	6.61666e-68	-0.919961	0.367	0.522	5.25694e-64
Psen2	7.72636e-68	0.82814	0.468	0.296	6.13859e-64
Cyp27a1	1.23689e-67	0.803384	0.655	0.524	9.8271e-64
Hoga1	1.37342e-67	0.550326	0.724	0.587	1.09118e-63
Cyp4a32	1.38875e-67	1.09011	0.46	0.312	1.10336e-63
Baz2b	5.60736e-67	-0.51243	0.727	0.81	4.45505e-63
Gm15738	8.2238e-67	0.891978	0.436	0.274	6.53381e-63
Gm42413	1.70871e-66	1.08279	0.332	0.176	1.35757e-62
Rdh16	3.59936e-66	1.1093	0.342	0.188	2.85969e-62
Zfp445	4.16366e-66	-0.525371	0.571	0.713	3.30803e-62
Adgrl2	5.74404e-66	0.63363	0.621	0.464	4.56364e-62
Arhgap6	6.34286e-66	0.698708	0.582	0.421	5.0394e-62
Gm13613	6.58983e-66	1.20649	0.3	0.154	5.23562e-62
Gm15640	1.283e-65	1.25686	0.259	0.117	1.01934e-61
Angptl3	2.19488e-65	1.02243	0.442	0.285	1.74384e-61
Tcirg1	7.89875e-65	-1.83734	0.054	0.165	6.27556e-61
Glt1d1	1.2626e-64	0.667132	0.595	0.439	1.00314e-60
Foxo3	1.71608e-64	0.513789	0.779	0.658	1.36342e-60
Pipox	2.22158e-64	0.605491	0.626	0.468	1.76504e-60
Slc29a1	2.39067e-64	0.671277	0.605	0.452	1.89938e-60
Aldh6a1	3.30983e-64	0.783631	0.48	0.315	2.62966e-60
Rarres2	3.54848e-64	1.39752	0.231	0.1	2.81926e-60
Gm49797	8.14549e-64	-0.873113	0.296	0.454	6.4716e-60
Adk	1.05909e-63	0.136896	0.998	0.997	8.41449e-60
Akr1c6	2.63002e-63	0.382422	0.625	0.419	2.08955e-59
Bche	8.36258e-63	1.08445	0.338	0.187	6.64407e-59
Lifr	1.32256e-62	-0.724122	0.606	0.716	1.05078e-58
4732463B04Rik	2.14417e-62	1.51706	0.196	0.075	1.70354e-58
Herpud1	2.42789e-62	0.276707	0.96	0.854	1.92896e-58
Klb	4.48784e-62	0.924331	0.393	0.236	3.56558e-58
Pdcd4	6.97872e-62	0.751897	0.574	0.428	5.54459e-58
Creb3l3	1.08122e-61	-0.458628	0.707	0.799	8.59031e-58
Ank3	1.46721e-61	1.23821	0.247	0.113	1.1657e-57
Egfros	1.89869e-61	-0.331681	0.698	0.851	1.50851e-57
Phldb2	3.08036e-61	0.545346	0.692	0.562	2.44735e-57
Farp1	1.66357e-60	-0.732716	0.433	0.576	1.3217e-56
Ttc23	2.6675e-60	-0.575997	0.618	0.727	2.11933e-56
Cisd1	3.72989e-60	1.09735	0.284	0.144	2.9634e-56
Hal	5.06487e-60	0.784193	0.63	0.527	4.02404e-56
Ddb1	8.70064e-60	-1.05471	0.187	0.33	6.91266e-56
Josd2	1.29614e-59	-0.96897	0.223	0.374	1.02979e-55
Frmd4b	1.65564e-59	0.453185	0.845	0.717	1.31541e-55
Cyp3a11	3.61853e-59	0.980918	0.296	0.152	2.87492e-55
Mup3	3.77556e-59	0.424594	0.97	0.928	2.99968e-55
Arg1	4.11027e-59	0.475084	0.827	0.765	3.26561e-55
Gstm1	6.15246e-59	1.0035	0.317	0.171	4.88813e-55
Bcl6	6.54075e-59	0.646934	0.684	0.59	5.19663e-55
Plcb1	6.56538e-59	-0.348582	0.926	0.96	5.2162e-55
Snx29	9.205e-59	-0.623604	0.582	0.693	7.31337e-55
Immp2l	1.49291e-58	-0.193963	0.996	0.996	1.18611e-54
Gm26608	1.67926e-58	0.792212	0.458	0.301	1.33417e-54
Grm8	1.73075e-58	-0.871464	0.369	0.512	1.37508e-54
Gm13561	2.01035e-58	1.12546	0.265	0.13	1.59723e-54
Gm11266	2.30261e-58	1.31347	0.256	0.126	1.82943e-54
Slc16a2	3.14224e-58	0.754923	0.517	0.365	2.49651e-54
Gm35696	6.51726e-58	-0.814703	0.256	0.411	5.17796e-54
Pdk1	7.28421e-58	1.1691	0.27	0.136	5.78731e-54
Gm4951	1.2033e-57	-0.340966	0.871	0.918	9.56023e-54
Ifi27	1.23007e-57	-1.3436	0.111	0.235	9.77288e-54
Gm36975	1.42525e-57	0.513266	0.638	0.473	1.13236e-53
Agxt2	2.24214e-57	0.452414	0.792	0.69	1.78138e-53
Pgrmc1	2.6848e-57	0.893845	0.411	0.261	2.13307e-53
Phf8	3.60011e-57	-0.689431	0.416	0.559	2.86029e-53
Blm	7.53391e-57	1.32862	0.191	0.076	5.98569e-53
Sardhos	1.25284e-56	0.89771	0.365	0.216	9.95385e-53
Lars2	1.35323e-56	-0.797068	0.369	0.512	1.07514e-52
H2-Q10	1.86383e-56	-0.372589	0.932	0.954	1.48081e-52
Gfra1	1.94402e-56	-0.319769	0.948	0.972	1.54452e-52
Slc19a2	1.99329e-56	0.686748	0.515	0.361	1.58367e-52
Fgfr2	2.84883e-56	0.308964	0.932	0.863	2.26339e-52
Cd302	3.15325e-56	0.531287	0.666	0.531	2.50525e-52
Serpinb6a	3.39297e-56	1.09037	0.274	0.139	2.69571e-52
Cxcl12	5.0138e-56	0.758816	0.463	0.311	3.98346e-52
Slc16a12	5.4556e-56	0.836017	0.361	0.211	4.33448e-52
Dixdc1	1.20411e-55	1.08653	0.266	0.135	9.56669e-52
Tcea3	2.24629e-55	1.21375	0.212	0.093	1.78468e-51
Rbp4	2.93782e-55	0.340073	0.959	0.917	2.3341e-51
Rhobtb1	3.17364e-55	0.388377	0.895	0.824	2.52146e-51
Agxt	1.48228e-54	1.23238	0.236	0.112	1.17767e-50
Celf2	2.02926e-54	-0.793362	0.461	0.586	1.61224e-50
Got1	2.38245e-54	0.884358	0.597	0.477	1.89286e-50
Depp1	2.74903e-54	1.15882	0.244	0.118	2.18411e-50
Mpzl2	2.84078e-54	1.06394	0.288	0.155	2.257e-50
Cyp2c23	4.18125e-54	0.715154	0.499	0.354	3.322e-50
Sik3	5.23257e-54	-0.341067	0.87	0.907	4.15728e-50
Apoc1	6.50394e-54	0.450748	0.903	0.83	5.16738e-50
Eif4a1	1.57064e-53	-0.939113	0.242	0.382	1.24788e-49
Glyctk	1.89655e-53	-0.657782	0.468	0.597	1.50681e-49
Cyp7a1	4.08795e-53	1.42513	0.248	0.126	3.24788e-49
Ces3a	9.83627e-53	-0.454494	0.81	0.871	7.81492e-49
Syne1	1.12535e-52	0.819629	0.355	0.211	8.9409e-49
Ypel2	1.26637e-52	0.626883	0.56	0.416	1.00613e-48
Car5a	1.75517e-52	0.851779	0.317	0.178	1.39448e-48
Lima1	2.82735e-52	0.554532	0.619	0.488	2.24633e-48
Gm4756	2.83449e-52	0.560356	0.559	0.407	2.252e-48
Ces1c	2.84631e-52	0.462823	0.681	0.538	2.26139e-48
Zfp395	3.43866e-52	0.75206	0.484	0.343	2.73202e-48
Celf1	4.30573e-52	-0.344822	0.82	0.877	3.4209e-48
Gm28836	4.73102e-52	0.92825	0.266	0.136	3.75879e-48
Glyat	6.49744e-52	-0.577516	0.584	0.692	5.16222e-48
Agtr1a	1.16486e-51	0.711776	0.473	0.328	9.2548e-48
Pik3c2a	2.31971e-51	-0.502492	0.661	0.751	1.84301e-47
Reps2	6.79113e-51	0.628573	0.537	0.39	5.39555e-47
Ube2k	1.26197e-50	-0.445765	0.694	0.777	1.00263e-46
Fasn	2.22938e-50	-0.685912	0.436	0.57	1.77124e-46
Gm22146	2.64097e-50	1.30052	0.202	0.091	2.09825e-46
Gramd1c	3.32319e-50	-0.519497	0.577	0.687	2.64027e-46
C730002L08Rik	4.05231e-50	1.46235	0.221	0.107	3.21956e-46
Gk	4.91043e-50	0.473442	0.715	0.598	3.90134e-46
Zhx2	8.96628e-50	-0.650646	0.406	0.54	7.12371e-46
4930556N13Rik	1.08964e-49	0.673618	0.517	0.376	8.65721e-46
Inmt	1.14267e-49	1.49516	0.15	0.055	9.07855e-46
Gm10800	1.21877e-49	-2.25342	0.019	0.089	9.68314e-46
Ahr	1.22526e-49	0.901484	0.373	0.236	9.73473e-46
Ivd	1.48484e-49	0.937541	0.324	0.189	1.17971e-45
Gstt2	1.96419e-49	0.896948	0.355	0.22	1.56055e-45
Nlrp12	2.08954e-49	0.669012	0.495	0.357	1.66014e-45
Chpt1	2.18072e-49	0.591675	0.55	0.413	1.73258e-45
Robo1	2.19674e-49	0.921931	0.318	0.185	1.74531e-45
Plscr2	3.79648e-49	1.40218	0.164	0.064	3.01631e-45
Aldh7a1	5.42477e-49	0.688367	0.474	0.334	4.30998e-45
Rpl10a	5.66277e-49	-0.774672	0.248	0.388	4.49907e-45
Hivep2	8.5622e-49	-0.762758	0.389	0.522	6.80267e-45
Usp6nl	1.21715e-48	-0.576836	0.478	0.603	9.67028e-45
Hexb	1.86254e-48	-1.16215	0.195	0.32	1.47979e-44
Pzp	1.87017e-48	0.260812	0.979	0.95	1.48585e-44
Abca6	2.39206e-48	0.299519	0.929	0.887	1.90049e-44
Plin2	1.08407e-47	-0.591984	0.426	0.558	8.61292e-44
Ambp	1.13583e-47	-0.629369	0.427	0.559	9.02416e-44
Ptp4a1	1.27575e-47	1.31539	0.181	0.077	1.01358e-43
Serpina1b	1.29204e-47	0.543777	0.729	0.62	1.02653e-43
Azgp1	1.65639e-47	0.291013	0.941	0.907	1.31601e-43
Serpina1d	2.4506e-47	0.756509	0.418	0.279	1.947e-43
Bnip3	2.94941e-47	0.734505	0.446	0.313	2.34331e-43
Eps15	3.77313e-47	-0.555028	0.423	0.557	2.99775e-43
Gm19619	6.05998e-47	-1.00251	0.151	0.273	4.81465e-43
Gm37240	6.26261e-47	0.439537	0.692	0.556	4.97565e-43
Zfp970	1.22467e-46	-1.04308	0.119	0.234	9.73e-43
Sephs2	1.45748e-46	0.590846	0.627	0.507	1.15797e-42
Gm10069	1.54484e-46	0.534376	0.555	0.416	1.22737e-42
Gcgr	1.62898e-46	-0.537218	0.6	0.702	1.29423e-42
Son	2.71659e-46	-0.343332	0.786	0.853	2.15833e-42
Gm48633	2.90455e-46	0.546631	0.609	0.49	2.30766e-42
Slc47a1	3.88793e-46	0.67029	0.457	0.323	3.08896e-42
Brd4	3.94297e-46	-0.428263	0.716	0.79	3.13269e-42
Cyp2c38	4.09826e-46	1.53793	0.303	0.189	3.25607e-42
Hipk2	5.99505e-46	-0.539949	0.522	0.641	4.76307e-42
Mcc	7.02623e-46	0.549661	0.695	0.593	5.58234e-42
Ccnd3	7.16408e-46	0.874562	0.324	0.198	5.69186e-42
5031425E22Rik	7.9912e-46	-0.48142	0.593	0.692	6.34901e-42
Rdh16f2	8.21791e-46	1.04267	0.28	0.161	6.52913e-42
Mdn1	9.86976e-46	-0.886607	0.195	0.32	7.84153e-42
Aars	1.17672e-45	-0.856682	0.232	0.36	9.34902e-42
BC049987	1.59183e-45	0.857201	0.326	0.196	1.26471e-41
Prkag2	1.94031e-45	0.438295	0.738	0.654	1.54157e-41
Kyat3	3.18488e-45	-0.379059	0.651	0.77	2.53039e-41
Gys2	3.28105e-45	0.529277	0.728	0.629	2.60679e-41
St6gal1	5.77374e-45	0.972181	0.312	0.189	4.58723e-41
Prlr	6.25698e-45	0.579736	0.455	0.315	4.97117e-41
Gm11844	7.28196e-45	1.10396	0.241	0.127	5.78551e-41
4833411C07Rik	7.5137e-45	0.845537	0.349	0.222	5.96963e-41
Cebpb	1.11537e-44	0.528424	0.701	0.589	8.86164e-41
Lrpprc	1.18517e-44	-0.403498	0.667	0.751	9.41617e-41
Bphl	1.23397e-44	0.667194	0.449	0.318	9.80389e-41
Sorbs2	1.28238e-44	0.310827	0.93	0.904	1.01885e-40
Ces1b	1.41797e-44	1.06349	0.243	0.129	1.12658e-40
Anp32a	1.68914e-44	0.779879	0.349	0.219	1.34202e-40
Pxmp2	1.84446e-44	0.888107	0.29	0.167	1.46543e-40
Bcl2l1	1.90076e-44	0.681895	0.377	0.241	1.51015e-40
Abca8b	2.37444e-44	0.52649	0.614	0.489	1.88649e-40
Fbp1	2.50065e-44	-0.385118	0.883	0.876	1.98677e-40
4931428L18Rik	4.85619e-44	1.23203	0.189	0.088	3.85825e-40
Cers6	6.3951e-44	0.607008	0.473	0.339	5.08091e-40
Gpd2	7.29693e-44	-0.629102	0.394	0.526	5.79741e-40
Xylb	7.9781e-44	-0.468658	0.625	0.72	6.3386e-40
Nipsnap1	8.14405e-44	0.671584	0.439	0.308	6.47044e-40
Hpgd	8.3319e-44	0.874972	0.268	0.149	6.61969e-40
Shld2	1.46821e-43	-0.427908	0.715	0.783	1.1665e-39
Rapgef2	1.62152e-43	0.433639	0.734	0.643	1.2883e-39
Tcf25	2.59291e-43	-0.471032	0.608	0.709	2.06007e-39
Slc38a2	2.8409e-43	0.475637	0.854	0.798	2.2571e-39
Gm49668	2.95373e-43	1.14825	0.202	0.098	2.34674e-39
Nlk	3.04636e-43	-0.589912	0.406	0.53	2.42033e-39
Erbb3	3.81255e-43	0.645548	0.431	0.295	3.02907e-39
Ttyh2	4.83929e-43	-0.757016	0.243	0.371	3.84482e-39
Fth1	5.31883e-43	0.719147	0.439	0.308	4.22581e-39
Cfhr1	6.1353e-43	0.484601	0.659	0.549	4.87449e-39
Serpina3n	6.94472e-43	1.03152	0.252	0.139	5.51758e-39
F13b	7.21175e-43	0.753663	0.38	0.253	5.72974e-39
Ldlrad4	8.07586e-43	-0.621833	0.445	0.569	6.41627e-39
Gbf1	9.22e-43	-0.42548	0.692	0.773	7.32529e-39
Gm15614	1.04033e-42	0.729887	0.351	0.221	8.26542e-39
Zfp407	1.4666e-42	-0.427201	0.698	0.783	1.16522e-38
Agt	1.5206e-42	0.925122	0.298	0.179	1.20812e-38
Gm30505	2.98191e-42	0.642826	0.432	0.298	2.36913e-38
Cd36	3.03445e-42	1.18487	0.191	0.092	2.41087e-38
Ubr4	3.48306e-42	-0.640978	0.367	0.489	2.76729e-38
Csad	5.24712e-42	0.816278	0.346	0.224	4.16884e-38
Pm20d1	1.13743e-41	0.821254	0.326	0.202	9.03689e-38
Mccc2	1.3723e-41	0.841735	0.294	0.174	1.09029e-37
Pard3	1.45252e-41	-0.244632	0.946	0.967	1.15403e-37
Slc22a28	2.08777e-41	-0.656696	0.366	0.485	1.65874e-37
Rbms1	2.10038e-41	0.341448	0.708	0.588	1.66875e-37
Hdlbp	2.23044e-41	-0.408725	0.698	0.774	1.77209e-37
Nsmf	3.02499e-41	-0.717633	0.288	0.415	2.40335e-37
Tpt1	3.94028e-41	0.768709	0.392	0.266	3.13055e-37
Tnrc6b	4.22425e-41	0.353927	0.828	0.757	3.35617e-37
Fgd4	5.1365e-41	0.538772	0.555	0.436	4.08095e-37
Stk19	5.81624e-41	-0.938227	0.168	0.283	4.621e-37
Sgms2	5.92736e-41	0.568752	0.488	0.356	4.70929e-37
Brd2	6.45316e-41	-0.745504	0.237	0.361	5.12704e-37
Zfp598	6.81072e-41	-0.81874	0.194	0.314	5.41112e-37
Ptprg	8.23247e-41	-0.302932	0.876	0.92	6.5407e-37
Chsy3	1.28987e-40	-0.352075	0.811	0.877	1.0248e-36
Acad11	1.32711e-40	-0.380678	0.732	0.798	1.05439e-36
Fgf1	1.56468e-40	0.619727	0.476	0.352	1.24314e-36
Tango2	1.79415e-40	0.674048	0.431	0.301	1.42545e-36
Bcl7c	1.90896e-40	-1.02103	0.15	0.259	1.51667e-36
Ppargc1b	2.51803e-40	0.758438	0.389	0.265	2.00058e-36
Fam135a	3.03293e-40	-0.44171	0.558	0.668	2.40966e-36
Ei24	3.42645e-40	0.580876	0.497	0.366	2.72232e-36
Nufip2	3.85622e-40	-0.471523	0.556	0.66	3.06377e-36
Lnx2	6.16565e-40	0.639088	0.499	0.379	4.89861e-36
Zcchc7	6.7966e-40	-0.27713	0.904	0.936	5.3999e-36
Acsm3	6.94151e-40	0.741217	0.341	0.219	5.51503e-36
5330438D12Rik	9.07014e-40	0.464885	0.574	0.436	7.20623e-36
B2m	9.11894e-40	0.7101	0.439	0.312	7.245e-36
Rxra	2.28373e-39	-0.541976	0.54	0.645	1.81442e-35
F830016B08Rik	2.6492e-39	-0.672624	0.365	0.482	2.10479e-35
Tor1b	3.05718e-39	-0.96817	0.155	0.264	2.42893e-35
Fbxo31	3.32575e-39	0.849879	0.293	0.18	2.64231e-35
Gpld1	3.52261e-39	0.504295	0.557	0.433	2.79871e-35
Nrp2	3.89953e-39	1.51764	0.128	0.049	3.09818e-35
Kif21a	5.34846e-39	0.494637	0.65	0.548	4.24935e-35
Atrn	6.1002e-39	-0.349187	0.759	0.825	4.84661e-35
Sdr42e1	6.58152e-39	0.773785	0.363	0.245	5.22901e-35
Gm47719	7.45497e-39	0.756455	0.358	0.241	5.92297e-35
Jun	8.24005e-39	1.31297	0.258	0.155	6.54672e-35
Gm15261	1.2881e-38	1.03534	0.212	0.112	1.0234e-34
Ppan	1.31479e-38	-1.28741	0.065	0.149	1.0446e-34
Adhfe1	1.39648e-38	0.606703	0.405	0.276	1.1095e-34
Nek6	2.58464e-38	-0.892319	0.175	0.284	2.05349e-34
Acat3	3.67344e-38	0.558264	0.493	0.368	2.91855e-34
Tmbim6	3.74357e-38	0.511014	0.57	0.453	2.97426e-34
Itpr1	4.49934e-38	-0.326052	0.837	0.887	3.57473e-34
Mpnd	6.43755e-38	-1.04173	0.105	0.201	5.11463e-34
Dnajc11	6.63999e-38	-0.725758	0.278	0.394	5.27547e-34
AC171003.1	8.719e-38	0.891508	0.261	0.152	6.92725e-34
Angptl4	8.89518e-38	-0.597466	0.386	0.506	7.06722e-34
Oaz1	9.80015e-38	0.555199	0.52	0.395	7.78622e-34
Eef1a1	1.02222e-37	0.463959	0.654	0.544	8.12152e-34
Gdf15	1.44609e-37	1.06863	0.323	0.216	1.14892e-33
Tmem214	1.6256e-37	-0.886762	0.159	0.267	1.29154e-33
Ppargc1a	1.7749e-37	0.562889	0.457	0.328	1.41016e-33
Gm34280	3.1676e-37	0.854191	0.271	0.162	2.51666e-33
Cnot4	4.12387e-37	-0.383105	0.654	0.747	3.27641e-33
Gcn1	4.68051e-37	-0.792519	0.18	0.293	3.71866e-33
Dpy19l1	4.86321e-37	-0.484695	0.523	0.628	3.86382e-33
R3hdm1	5.00341e-37	-0.369764	0.727	0.787	3.97521e-33
Hibadh	5.64396e-37	0.403445	0.647	0.533	4.48413e-33
Gm34868	7.05951e-37	0.986582	0.201	0.104	5.60878e-33
Foxa3	8.42766e-37	-0.883293	0.19	0.298	6.69578e-33
Wfdc21	1.52809e-36	0.82271	0.319	0.207	1.21407e-32
Fggy	1.63437e-36	0.253436	0.903	0.88	1.2985e-32
Eepd1	1.7177e-36	0.908318	0.256	0.15	1.36471e-32
Paics	1.80929e-36	0.778806	0.367	0.256	1.43748e-32
Nqo2	2.11705e-36	0.936037	0.215	0.116	1.682e-32
Junb	2.12719e-36	1.41684	0.157	0.074	1.69005e-32
Vwa8	2.46061e-36	-0.232819	0.954	0.969	1.95495e-32
D530033B14Rik	3.95651e-36	0.751946	0.313	0.198	3.14345e-32
Hrg	4.65342e-36	0.543189	0.595	0.492	3.69714e-32
Elovl5	5.19788e-36	0.368833	0.73	0.614	4.12971e-32
Cyp2c54	5.32663e-36	0.901033	0.27	0.164	4.232e-32
Cyp2e1	6.54137e-36	0.60261	0.465	0.347	5.19712e-32
Nrp1	7.30718e-36	0.5833	0.477	0.351	5.80555e-32
Slc7a2	8.1571e-36	0.169858	0.985	0.964	6.48081e-32
Aspg	9.28658e-36	-0.558874	0.505	0.607	7.37819e-32
Rcl1	1.69873e-35	0.522409	0.665	0.569	1.34964e-31
Nolc1	2.35518e-35	-1.08493	0.079	0.165	1.87119e-31
H2-K1	2.83192e-35	-0.475294	0.537	0.643	2.24996e-31
Nek7	3.25973e-35	-0.383222	0.679	0.762	2.58986e-31
Sugct	4.17732e-35	0.337919	0.841	0.787	3.31888e-31
Adh7	4.29788e-35	0.467625	0.535	0.413	3.41466e-31
Osbpl3	5.23874e-35	1.62455	0.093	0.03	4.16218e-31
Gm12353	5.33874e-35	0.540377	0.458	0.331	4.24163e-31
Ubac2	5.92216e-35	-0.593527	0.347	0.46	4.70516e-31
Ddhd2	5.98911e-35	-0.474783	0.418	0.531	4.75835e-31
Supt5	7.0803e-35	-0.711911	0.25	0.36	5.6253e-31
Lipc	8.55178e-35	0.382247	0.722	0.631	6.79439e-31
Mup14	1.05385e-34	-0.884932	0.095	0.184	8.37282e-31
Ddt	1.33666e-34	0.771631	0.325	0.214	1.06198e-30
Khk	1.38926e-34	-0.556625	0.454	0.551	1.10377e-30
Rabep1	1.55823e-34	0.341873	0.797	0.729	1.23801e-30
Hnf4a	1.88504e-34	-0.333161	0.806	0.853	1.49766e-30
Hadha	2.37471e-34	-0.531479	0.419	0.53	1.88671e-30
Plxna2	2.83661e-34	0.787828	0.419	0.323	2.25369e-30
Hist1h1c	3.05586e-34	1.11676	0.177	0.09	2.42788e-30
Gne	3.2364e-34	0.43097	0.655	0.551	2.57132e-30
A1cf	3.29905e-34	0.20266	0.916	0.866	2.62109e-30
Safb2	3.59539e-34	-0.528721	0.379	0.494	2.85654e-30
Gcnt2	3.88729e-34	-0.41468	0.76	0.807	3.08845e-30
Adap2	4.39252e-34	-0.594161	0.385	0.496	3.48986e-30
Nr4a1	4.42007e-34	2.1075	0.081	0.024	3.51175e-30
BC028777	5.54359e-34	0.358607	0.612	0.476	4.40439e-30
Kdm2b	7.99194e-34	1.10027	0.166	0.082	6.3496e-30
Rbpms	1.03809e-33	-0.456315	0.851	0.885	8.24762e-30
Hipk3	1.26649e-33	0.60999	0.418	0.306	1.00623e-29
Lbp	1.54588e-33	0.716088	0.315	0.205	1.2282e-29
Creg1	1.65732e-33	0.778082	0.335	0.228	1.31674e-29
Gm42109	1.69427e-33	0.592232	0.436	0.321	1.3461e-29
Ppfibp2	1.75392e-33	0.513845	0.494	0.377	1.39349e-29
Chchd3	1.78934e-33	-0.30058	0.825	0.868	1.42163e-29
Cgnl1	1.87231e-33	-0.478946	0.514	0.614	1.48755e-29
Osbpl1a	2.52514e-33	0.321121	0.814	0.749	2.00623e-29
Lamp2	2.67803e-33	0.269784	0.877	0.827	2.1277e-29
Dus1l	2.80028e-33	-1.09117	0.1	0.188	2.22482e-29
Enpp2	2.8457e-33	0.48121	0.576	0.467	2.26091e-29
Marf1	3.27541e-33	0.455994	0.62	0.524	2.60231e-29
Srsf6	3.43713e-33	-0.466954	0.469	0.572	2.7308e-29
Scarb1	4.03253e-33	0.49807	0.549	0.436	3.20384e-29
Ep400	4.03254e-33	-0.444773	0.525	0.625	3.20385e-29
Ifrd1	4.10214e-33	0.6188	0.582	0.494	3.25915e-29
Erc2	5.13501e-33	-0.476479	0.603	0.688	4.07977e-29
Mup21	5.46178e-33	0.413415	0.324	0.204	4.33938e-29
Dnase2b	5.9019e-33	0.240842	0.846	0.733	4.68906e-29
Raf1	7.1407e-33	-0.405369	0.591	0.671	5.67328e-29
Fam193b	7.34637e-33	-0.652433	0.374	0.481	5.83669e-29
Rnf13	1.52537e-32	0.458593	0.581	0.469	1.21191e-28
Gstt1	1.62779e-32	1.0653	0.15	0.071	1.29328e-28
Inhba	1.76731e-32	-0.765657	0.23	0.339	1.40413e-28
Fmo5	2.19463e-32	0.312546	0.937	0.892	1.74364e-28
Mst1	2.29394e-32	-0.709718	0.304	0.413	1.82253e-28
Fhit	2.34352e-32	-0.417867	0.696	0.771	1.86193e-28
Maob	3.63233e-32	0.412345	0.611	0.5	2.88589e-28
Arhgap42	3.70136e-32	-0.213653	0.943	0.958	2.94073e-28
Agl	3.74027e-32	0.629531	0.383	0.274	2.97165e-28
Fndc3b	4.49359e-32	-0.484949	0.451	0.562	3.57015e-28
Gm16984	5.26705e-32	0.629354	0.353	0.241	4.18467e-28
Gm46367	5.40471e-32	0.562561	0.377	0.261	4.29404e-28
Gvin1	5.68201e-32	-2.67193	0.008	0.049	4.51436e-28
Gm826	5.97492e-32	-0.942358	0.107	0.196	4.74707e-28
Slc25a51	6.35663e-32	-0.443153	0.557	0.647	5.05034e-28
Gm47371	6.90852e-32	0.481369	0.499	0.385	5.48882e-28
Prickle1	8.34762e-32	1.39929	0.12	0.051	6.63219e-28
Ugp2	8.63431e-32	0.352775	0.815	0.734	6.85996e-28
Mia3	9.09741e-32	0.394837	0.68	0.593	7.22789e-28
Slc6a13	9.94376e-32	-0.477778	0.531	0.621	7.90032e-28
Tmem106b	1.37324e-31	0.605461	0.431	0.319	1.09104e-27
1010001N08Rik	1.38076e-31	0.873547	0.248	0.152	1.09702e-27
Ssu72	1.4222e-31	-0.660823	0.218	0.324	1.12994e-27
Bcat2	1.47299e-31	0.644016	0.337	0.231	1.17029e-27
Akr1c19	1.7397e-31	0.683387	0.308	0.202	1.38219e-27
Klkb1	1.97865e-31	0.338377	0.735	0.653	1.57204e-27
Ocln	2.34477e-31	0.645157	0.439	0.337	1.86292e-27
Svil	2.55152e-31	0.478138	0.559	0.456	2.02718e-27
2006-03-01	2.85758e-31	0.387332	0.664	0.584	2.27035e-27
Sfpq	3.26436e-31	-0.450907	0.484	0.585	2.59353e-27
Aadac	3.7898e-31	0.490688	0.591	0.493	3.01099e-27
Dcaf5	4.09732e-31	-0.549901	0.428	0.527	3.25532e-27
H2-Q7	4.29289e-31	-0.759729	0.151	0.248	3.4107e-27
Cdk19	5.03465e-31	0.544162	0.413	0.3	4.00003e-27
Chchd2	6.18348e-31	0.802581	0.289	0.19	4.91278e-27
Clec2d	6.67162e-31	0.349267	0.845	0.787	5.3006e-27
Rnf152	6.68763e-31	0.72396	0.315	0.212	5.31332e-27
Tspan31	7.45095e-31	-0.885328	0.151	0.246	5.91978e-27
Dennd5b	8.63025e-31	0.226083	0.937	0.916	6.85674e-27
Ip6k2	9.76275e-31	0.477567	0.499	0.386	7.7565e-27
Ptprj	1.00607e-30	0.341795	0.748	0.663	7.9932e-27
AI480526	1.07353e-30	0.597065	0.365	0.257	8.52922e-27
Arfgap2	1.08007e-30	-0.62135	0.326	0.434	8.58113e-27
Prpf40a	1.10464e-30	-0.419473	0.507	0.609	8.77639e-27
Lonp2	1.16298e-30	-0.242102	0.918	0.936	9.23986e-27
Kif1b	1.18851e-30	0.306452	0.825	0.771	9.44272e-27
Dnajc5	1.42284e-30	-0.553651	0.347	0.454	1.13045e-26
Mrnip	1.45547e-30	0.689331	0.214	0.121	1.15637e-26
Cdc14b	1.52241e-30	0.489742	0.501	0.391	1.20955e-26
Adnp	1.58434e-30	-0.546877	0.388	0.488	1.25876e-26
Acadm	1.69864e-30	0.468639	0.569	0.467	1.34957e-26
Pdhb	1.84757e-30	-0.532796	0.356	0.464	1.4679e-26
Pygl	1.88196e-30	-0.333428	0.783	0.817	1.49522e-26
Tacc1	2.12413e-30	-0.506602	0.441	0.541	1.68762e-26
Sucnr1	2.49725e-30	1.22446	0.133	0.061	1.98406e-26
Ass1	2.55525e-30	0.303396	0.815	0.731	2.03015e-26
Mob3b	3.01882e-30	0.259618	0.903	0.866	2.39845e-26
Pbld1	3.68734e-30	0.284508	0.829	0.769	2.92959e-26
Esr1	3.83857e-30	-0.763089	0.264	0.366	3.04974e-26
Gm19522	4.10458e-30	0.897591	0.218	0.128	3.26109e-26
Gabarapl1	5.72493e-30	0.6614	0.335	0.229	4.54846e-26
Rab3gap1	5.84826e-30	-0.438576	0.462	0.564	4.64644e-26
Tbc1d8	6.20563e-30	-0.458732	0.458	0.56	4.93037e-26
Ern1	6.98836e-30	-0.321056	0.81	0.852	5.55225e-26
Serpina1e	8.3802e-30	-0.361034	0.683	0.74	6.65807e-26
Slc10a1	8.5287e-30	0.447703	0.654	0.566	6.77605e-26
Gm21887	9.15418e-30	-1.07956	0.072	0.147	7.273e-26
Zeb1	9.25211e-30	-0.329136	0.744	0.813	7.3508e-26
Dnajc12	1.00725e-29	0.550277	0.447	0.331	8.00258e-26
Pim3	1.10825e-29	0.553939	0.449	0.339	8.80501e-26
Grem2	1.18077e-29	-0.86614	0.277	0.371	9.38119e-26
Fn1	1.30619e-29	0.296238	0.879	0.824	1.03776e-25
Ugt3a1	1.31642e-29	0.73387	0.259	0.163	1.0459e-25
9030622O22Rik	1.46408e-29	-0.289325	0.939	0.952	1.16321e-25
Usp10	1.58578e-29	-0.521043	0.352	0.457	1.2599e-25
Itsn1	1.72555e-29	0.540649	0.403	0.292	1.37095e-25
Afm	1.79856e-29	0.523058	0.568	0.471	1.42896e-25
Gm4070	1.92805e-29	-3.32649	0.003	0.035	1.53184e-25
Decr1	2.1029e-29	-0.51878	0.371	0.474	1.67075e-25
Arhgap35	2.30584e-29	-0.490795	0.46	0.554	1.83199e-25
Stat2	2.41793e-29	-0.446772	0.477	0.58	1.92105e-25
Hip1r	2.6316e-29	-1.03517	0.126	0.21	2.0908e-25
Rwdd3	3.02996e-29	1.09433	0.16	0.082	2.4073e-25
Pltp	3.3671e-29	1.94139	0.063	0.016	2.67516e-25
Cyp2d9	3.40609e-29	-0.219243	0.744	0.847	2.70614e-25
Ugt1a6a	3.48839e-29	0.738208	0.262	0.164	2.77153e-25
Ldlr	3.54971e-29	0.489617	0.676	0.604	2.82025e-25
Mup7	3.68148e-29	-1.14907	0.07	0.141	2.92493e-25
Gm15764	3.78841e-29	0.717218	0.277	0.18	3.00989e-25
Nop56	4.19255e-29	-1.25281	0.054	0.12	3.33098e-25
Tspan12	4.44288e-29	0.355063	0.679	0.594	3.52987e-25
Pter	4.86209e-29	0.447776	0.707	0.637	3.86293e-25
Otc	4.9328e-29	0.403066	0.65	0.555	3.91911e-25
Aqp9	5.12727e-29	0.387456	0.536	0.415	4.07361e-25
Cnot3	5.34001e-29	-0.634441	0.235	0.34	4.24264e-25
Scamp1	6.39306e-29	0.578652	0.394	0.289	5.07928e-25
Dleu2	7.19119e-29	0.413293	0.635	0.55	5.7134e-25
9130016M20Rik	7.39127e-29	0.526529	0.442	0.333	5.87236e-25
Smim13	8.70635e-29	0.74624	0.256	0.161	6.9172e-25
Sco2	9.42968e-29	0.464368	0.506	0.394	7.49188e-25
Ifnar2	1.0151e-28	0.712398	0.235	0.143	8.06497e-25
Nt5c3	1.08144e-28	0.759503	0.231	0.14	8.59207e-25
Rtn3	1.28203e-28	-0.346025	0.636	0.723	1.01858e-24
Gm16552	1.38272e-28	0.499876	0.414	0.304	1.09857e-24
Npc1	1.40455e-28	0.402763	0.608	0.515	1.11591e-24
Gm26787	1.55967e-28	1.00542	0.168	0.09	1.23916e-24
Rbl2	1.79772e-28	0.651871	0.328	0.23	1.42829e-24
Yars	1.9506e-28	-0.697476	0.218	0.315	1.54976e-24
Oplah	1.9776e-28	-1.0048	0.098	0.178	1.5712e-24
Btg1	2.31067e-28	0.81352	0.229	0.139	1.83583e-24
Wipf3	2.32215e-28	0.875668	0.198	0.113	1.84495e-24
Gtf2f2	2.36698e-28	-0.651739	0.251	0.354	1.88057e-24
Snx10	2.38599e-28	-0.655591	0.276	0.374	1.89567e-24
Sorbs1	2.66025e-28	0.281417	0.814	0.745	2.11357e-24
Cyp2c50	3.05567e-28	0.870148	0.24	0.148	2.42773e-24
Echs1	3.16359e-28	0.632323	0.28	0.179	2.51347e-24
Tcf7l1	3.36967e-28	-0.533389	0.384	0.483	2.6772e-24
Cp	4.09545e-28	0.239334	0.953	0.923	3.25383e-24
Nipbl	4.25599e-28	-0.261965	0.801	0.854	3.38139e-24
C3	1.0007e-27	-0.603552	0.601	0.651	7.95058e-24
Med27	1.02945e-27	-0.669076	0.251	0.348	8.17896e-24
Stard4	1.03839e-27	0.742702	0.298	0.202	8.25e-24
Cdh1	1.25124e-27	-0.903394	0.133	0.218	9.94108e-24
Lrrfip1	1.25517e-27	0.491087	0.423	0.316	9.97232e-24
Rgn	2.05212e-27	0.581104	0.245	0.153	1.63041e-23
Chp1	2.40178e-27	0.420966	0.535	0.43	1.90821e-23
BC005561	2.50341e-27	-0.50277	0.466	0.552	1.98896e-23
Gatad2a	2.79397e-27	-0.518888	0.343	0.445	2.21981e-23
Usp34	2.80951e-27	-0.243297	0.853	0.883	2.23216e-23
Met	2.88474e-27	0.442054	0.541	0.447	2.29192e-23
Rabl6	3.02799e-27	-0.645111	0.217	0.315	2.40574e-23
Dusp1	3.16937e-27	-0.399823	0.525	0.62	2.51807e-23
Ankrd11	3.20364e-27	-0.314442	0.745	0.803	2.54529e-23
Abhd18	3.44005e-27	0.400328	0.581	0.483	2.73312e-23
Bcl3	3.64312e-27	-0.852133	0.119	0.201	2.89446e-23
Gm40438	3.89429e-27	0.60549	0.35	0.249	3.09401e-23
Tenm3	4.08444e-27	0.692624	0.335	0.24	3.24509e-23
Gm34408	4.20281e-27	0.569478	0.329	0.229	3.33913e-23
Dvl1	4.50065e-27	-0.589942	0.287	0.388	3.57577e-23
Mindy2	4.58658e-27	0.507746	0.418	0.313	3.64404e-23
Ttc36	5.14827e-27	0.636568	0.321	0.223	4.0903e-23
Mir99ahg	5.85888e-27	0.348389	0.78	0.721	4.65488e-23
Akr1c14	6.72497e-27	0.424938	0.548	0.447	5.34299e-23
Gm34777	7.3828e-27	0.796497	0.224	0.138	5.86564e-23
Vti1a	7.85375e-27	-0.311869	0.746	0.801	6.2398e-23
Gm15991	7.93848e-27	0.871703	0.198	0.116	6.30712e-23
Arih1	8.50509e-27	-0.279616	0.758	0.814	6.7573e-23
Cyp2c67	8.93932e-27	0.427673	0.333	0.227	7.10229e-23
Bcas3	1.09212e-26	-0.295997	0.759	0.823	8.67689e-23
Gamt	1.23506e-26	1.13381	0.127	0.061	9.81253e-23
Zmiz1	1.35037e-26	0.388111	0.619	0.53	1.07287e-22
Pnrc1	1.41496e-26	0.72721	0.264	0.172	1.12418e-22
Spop	1.49687e-26	-0.335662	0.66	0.732	1.18926e-22
Nr1h4	1.70273e-26	-0.211705	0.959	0.965	1.35282e-22
Kmt2d	1.78315e-26	-0.761652	0.172	0.261	1.41671e-22
Baz1a	1.79533e-26	-0.561969	0.258	0.36	1.42639e-22
Etnppl	1.86579e-26	0.537224	0.542	0.45	1.48237e-22
Ftcd	1.89967e-26	-0.273833	0.74	0.832	1.50928e-22
Tns3	1.91506e-26	-0.610349	0.276	0.372	1.52151e-22
Ccdc152	2.00349e-26	0.565197	0.429	0.334	1.59177e-22
Elovl2	2.07746e-26	-0.417447	0.678	0.738	1.65054e-22
Ddx17	2.49355e-26	-0.257284	0.806	0.851	1.98112e-22
Tpmt	2.55159e-26	0.696435	0.285	0.192	2.02724e-22
Trim28	2.78955e-26	0.49896	0.478	0.38	2.2163e-22
Aldh1l1	2.86954e-26	0.314168	0.787	0.724	2.27985e-22
Map3k13	3.19038e-26	-0.467995	0.464	0.555	2.53475e-22
Tmem259	3.41014e-26	-0.58105	0.261	0.361	2.70936e-22
Tank	3.55573e-26	-0.549155	0.301	0.401	2.82503e-22
Ddx21	3.59368e-26	-0.793771	0.097	0.174	2.85518e-22
Insr	3.72974e-26	0.252909	0.828	0.786	2.96328e-22
St3gal5	4.52603e-26	0.276905	0.888	0.827	3.59593e-22
D930016D06Rik	5.09149e-26	-0.590827	0.277	0.374	4.04519e-22
Irf2bp2	5.29317e-26	0.35053	0.669	0.572	4.20542e-22
Hsd17b12	6.26643e-26	-0.384185	0.569	0.648	4.97868e-22
Ugt3a2	7.05501e-26	0.456054	0.469	0.366	5.6052e-22
Igfbp2	8.07671e-26	0.929286	0.194	0.115	6.41695e-22
Sgk2	8.08681e-26	0.525589	0.376	0.275	6.42497e-22
Gm4952	8.18607e-26	0.618604	0.33	0.234	6.50383e-22
Rad51b	1.11314e-25	0.925193	0.183	0.105	8.8439e-22
4732465J04Rik	1.24663e-25	0.377541	0.635	0.552	9.90446e-22
Hnf4aos	1.26119e-25	0.393486	0.619	0.533	1.00202e-21
Inpp4a	1.41464e-25	0.50213	0.498	0.407	1.12393e-21
Huwe1	1.49032e-25	-0.250061	0.816	0.864	1.18406e-21
Pecr	1.6299e-25	0.478587	0.483	0.387	1.29495e-21
Colec12	1.64223e-25	0.386044	0.711	0.647	1.30475e-21
Phf21a	1.69803e-25	-0.301198	0.717	0.786	1.34909e-21
Mknk2	1.77168e-25	0.662843	0.31	0.216	1.4076e-21
Jund	1.81961e-25	0.798427	0.296	0.207	1.44568e-21
Pard3bos1	1.86988e-25	0.591983	0.303	0.207	1.48562e-21
Gm15756	1.89434e-25	0.919295	0.175	0.1	1.50506e-21
Sh3pxd2a	1.89497e-25	0.491208	0.396	0.292	1.50556e-21
Srsf7	2.01033e-25	0.471242	0.479	0.379	1.59721e-21
Ubap2	2.21221e-25	-0.580736	0.251	0.348	1.7576e-21
Agfg2	2.29898e-25	0.49152	0.408	0.306	1.82654e-21
Adra1a	2.32453e-25	0.916214	0.162	0.089	1.84684e-21
Zdhhc6	2.51539e-25	0.510089	0.484	0.391	1.99847e-21
Sox5	2.7708e-25	0.20309	0.912	0.884	2.2014e-21
Tox	3.14696e-25	0.611335	0.368	0.273	2.50026e-21
Rere	3.17089e-25	-0.233891	0.89	0.924	2.51927e-21
Acadvl	3.22135e-25	-0.833926	0.107	0.184	2.55936e-21
Cyp2c29	3.32848e-25	0.629517	0.409	0.313	2.64448e-21
Gm16573	3.74372e-25	0.443683	0.542	0.451	2.97438e-21
Dbi	4.30579e-25	0.370765	0.651	0.562	3.42095e-21
Mbl2	4.59913e-25	0.673098	0.285	0.194	3.65401e-21
Pgm3	5.28187e-25	-0.795021	0.163	0.247	4.19644e-21
Neu2	5.80826e-25	0.857082	0.214	0.135	4.61466e-21
Acsf2	5.97276e-25	-0.512826	0.373	0.465	4.74536e-21
Eva1a	6.74613e-25	0.31012	0.795	0.739	5.3598e-21
Wsb1	6.74831e-25	0.707601	0.533	0.469	5.36154e-21
Shmt1	7.28059e-25	0.421025	0.491	0.394	5.78443e-21
Lysmd4	8.99557e-25	0.597403	0.303	0.21	7.14698e-21
Sel1l	9.48747e-25	0.326212	0.69	0.604	7.5378e-21
Tbl1x	1.00596e-24	-0.542875	0.431	0.519	7.99237e-21
Hhex	1.08837e-24	-0.602676	0.257	0.352	8.64711e-21
Klf10	1.14461e-24	-0.536557	0.278	0.375	9.0939e-21
Snhg11	1.2296e-24	0.900306	0.244	0.161	9.76916e-21
Ncor2	1.23891e-24	-0.712508	0.18	0.266	9.84317e-21
Pprc1	1.328e-24	-1.08526	0.065	0.128	1.0551e-20
Hmgcs2	1.36358e-24	-0.15261	0.993	0.992	1.08337e-20
Atoh8	1.52712e-24	0.88991	0.154	0.084	1.2133e-20
Nfat5	1.78402e-24	-0.275346	0.66	0.729	1.4174e-20
Gm30849	1.95778e-24	0.827783	0.174	0.1	1.55545e-20
Ascc3	2.0221e-24	-0.273177	0.735	0.789	1.60656e-20
Pdia5	2.07478e-24	-0.428336	0.467	0.559	1.64841e-20
Coq10b	2.25606e-24	0.769268	0.338	0.254	1.79244e-20
Deptor	2.26817e-24	0.215963	0.885	0.834	1.80206e-20
Inhbc	2.35649e-24	-0.783865	0.121	0.199	1.87223e-20
Cacul1	2.46949e-24	-0.366706	0.534	0.613	1.96201e-20
Smad7	3.40853e-24	0.86133	0.219	0.139	2.70807e-20
Ndufa4	3.56028e-24	0.706099	0.284	0.195	2.82864e-20
Tsc22d2	3.57503e-24	-0.361816	0.557	0.639	2.84036e-20
Tiparp	3.61174e-24	1.0901	0.156	0.087	2.86953e-20
Lgals4	3.61514e-24	-0.731313	0.183	0.269	2.87223e-20
Ghr	3.69683e-24	-0.310153	0.998	0.997	2.93713e-20
Acot12	4.26802e-24	0.309201	0.749	0.675	3.39094e-20
Dmac2	4.41618e-24	0.668569	0.233	0.149	3.50865e-20
Map1lc3b	4.53934e-24	0.680199	0.262	0.176	3.60651e-20
Nrf1	4.74231e-24	-0.468775	0.429	0.518	3.76777e-20
Tcf20	4.91612e-24	-0.384332	0.551	0.632	3.90586e-20
Ebpl	4.93376e-24	0.788744	0.189	0.112	3.91987e-20
Strn3	5.41452e-24	-0.259948	0.74	0.797	4.30183e-20
Atp11c	5.66423e-24	0.176777	0.957	0.941	4.50023e-20
Hmgcl	6.61114e-24	0.514673	0.349	0.253	5.25255e-20
Gch1	6.6486e-24	0.495627	0.459	0.364	5.28231e-20
Braf	7.2455e-24	-0.383323	0.475	0.567	5.75655e-20
Srrt	7.24845e-24	-0.751722	0.159	0.243	5.75889e-20
Phka2	8.34517e-24	0.578007	0.305	0.213	6.63023e-20
Papola	1.31685e-23	-0.297441	0.735	0.784	1.04624e-19
Tcf4	1.36619e-23	-0.397797	0.528	0.614	1.08543e-19
Slc8b1	1.50681e-23	0.511188	0.371	0.273	1.19716e-19
Tshz3	1.53996e-23	-2.06706	0.022	0.064	1.2235e-19
Hsd17b6	1.75167e-23	0.731684	0.396	0.315	1.3917e-19
Prxl2c	2.04336e-23	0.605468	0.306	0.217	1.62345e-19
Rnf169	2.27164e-23	-0.203814	0.918	0.933	1.80481e-19
Rock2	2.39041e-23	-0.324551	0.6	0.679	1.89918e-19
Zcchc2	2.60492e-23	0.512512	0.383	0.288	2.06961e-19
Dennd1b	2.93422e-23	-0.320526	0.696	0.741	2.33124e-19
Slc45a3	3.01864e-23	0.537417	0.327	0.234	2.39831e-19
Nr6a1	3.37443e-23	-0.304684	0.746	0.799	2.68098e-19
Taf3	3.57586e-23	-0.507777	0.322	0.414	2.84102e-19
Gm3734	3.64975e-23	0.674	0.186	0.11	2.89972e-19
Eif4g3	4.06301e-23	-0.341209	0.603	0.674	3.22807e-19
Mbd1	4.14017e-23	-0.551501	0.368	0.457	3.28937e-19
Tfdp2	4.24038e-23	0.514762	0.351	0.255	3.36898e-19
Kcnt2	4.67603e-23	-0.880044	0.105	0.176	3.71511e-19
Apoc4	5.11286e-23	0.460536	0.551	0.461	4.06216e-19
Coq8a	5.87303e-23	0.542962	0.326	0.234	4.66613e-19
Chd3	6.30565e-23	-0.435441	0.375	0.471	5.00984e-19
Rtn4	6.4514e-23	0.991316	0.177	0.107	5.12563e-19
2002-03-01	6.89298e-23	0.372523	0.565	0.473	5.47647e-19
Arhgap24	7.13568e-23	-0.509983	0.481	0.56	5.6693e-19
Bcar3	7.48772e-23	0.455955	0.494	0.405	5.94899e-19
Hjv	7.9399e-23	0.606408	0.283	0.196	6.30825e-19
Reep3	8.28687e-23	-0.418716	0.494	0.579	6.58392e-19
Cyp2u1	9.48523e-23	-0.75633	0.148	0.226	7.53602e-19
Fbxo21	1.08238e-22	0.556398	0.314	0.222	8.59953e-19
Pspc1	1.10299e-22	-0.429723	0.378	0.473	8.76322e-19
Rab1a	1.12694e-22	-0.412255	0.396	0.489	8.95351e-19
Mmut	1.13928e-22	0.79277	0.219	0.142	9.05161e-19
Arhgef26	1.23318e-22	-0.195831	0.87	0.901	9.79761e-19
Ap3d1	1.3016e-22	-0.626981	0.232	0.318	1.03412e-18
Cntrl	1.47781e-22	0.528699	0.351	0.26	1.17412e-18
Bag4	1.52338e-22	0.593259	0.343	0.258	1.21032e-18
Ppp6r3	1.55065e-22	-0.300811	0.66	0.722	1.23199e-18
Atg16l2	1.59524e-22	0.559413	0.335	0.244	1.26742e-18
Pinx1	1.64197e-22	-0.97111	0.075	0.138	1.30455e-18
Etl4	1.65137e-22	0.412464	0.498	0.404	1.31201e-18
Fam92a	1.80816e-22	0.957692	0.128	0.067	1.43658e-18
Zfpm1	1.91447e-22	-0.650298	0.179	0.263	1.52105e-18
Chka	2.24164e-22	0.330927	0.738	0.676	1.78098e-18
Zfp207	2.36774e-22	-0.283769	0.629	0.697	1.88117e-18
Ngef	2.52675e-22	0.55361	0.341	0.25	2.0075e-18
C8g	2.66945e-22	0.488333	0.448	0.357	2.12088e-18
Cxadr	2.79935e-22	-0.38758	0.528	0.603	2.22408e-18
Mospd2	3.72936e-22	0.805167	0.198	0.124	2.96298e-18
Dhx40	3.8176e-22	0.578787	0.299	0.212	3.03308e-18
Leap2	4.35419e-22	0.519002	0.327	0.237	3.45941e-18
St7l	4.7012e-22	-0.378524	0.435	0.523	3.7351e-18
Gm16541	4.72939e-22	0.738411	0.233	0.154	3.7575e-18
Ndrg3	4.78628e-22	-0.461224	0.339	0.431	3.8027e-18
Lrrn3	5.14033e-22	0.490159	0.364	0.27	4.08399e-18
Htt	5.49394e-22	-0.537687	0.282	0.37	4.36493e-18
Ube2g1	5.74494e-22	-0.313908	0.646	0.715	4.56435e-18
Rnf213	6.70808e-22	-0.783018	0.159	0.235	5.32957e-18
Ehmt1	6.83882e-22	-0.270185	0.697	0.769	5.43344e-18
Nhs	7.01204e-22	0.906059	0.093	0.042	5.57107e-18
Kcnq1ot1	7.02745e-22	-0.404458	0.531	0.608	5.58331e-18
Rnf144b	7.28545e-22	0.323307	0.677	0.607	5.78829e-18
Upf1	8.39225e-22	-0.886519	0.101	0.169	6.66765e-18
Fam47e	8.76965e-22	-0.762503	0.157	0.234	6.96749e-18
Auh	8.79282e-22	0.610547	0.285	0.201	6.9859e-18
Tomm40l	8.89279e-22	0.712495	0.198	0.124	7.06532e-18
Eno1	9.06584e-22	-0.606709	0.164	0.246	7.20281e-18
Rasa3	1.03581e-21	1.7159	0.047	0.012	8.22953e-18
Dsc2	1.08856e-21	0.702894	0.258	0.177	8.6486e-18
Acox1	1.12415e-21	0.24725	0.968	0.958	8.93135e-18
Setd1a	1.19237e-21	-0.75248	0.16	0.237	9.47341e-18
Eif3a	1.32145e-21	-0.370528	0.463	0.554	1.04989e-17
Dop1b	1.40219e-21	0.476424	0.324	0.235	1.11404e-17
Cdkal1	1.4745e-21	-0.30173	0.666	0.731	1.17149e-17
Iah1	1.50939e-21	0.664589	0.266	0.185	1.19921e-17
Cyp2a5	1.59633e-21	1.06819	0.146	0.083	1.26828e-17
Ces1e	1.69473e-21	0.677125	0.198	0.124	1.34646e-17
Gpd1l	1.71204e-21	1.01251	0.103	0.049	1.36022e-17
Slc16a10	1.73628e-21	0.318103	0.671	0.582	1.37947e-17
Acacb	1.76858e-21	-0.366905	0.455	0.546	1.40513e-17
Gm49890	1.91786e-21	-0.847997	0.099	0.167	1.52374e-17
Aplp2	2.09738e-21	0.456893	0.451	0.363	1.66637e-17
Srrm2	2.0988e-21	-0.215091	0.89	0.915	1.6675e-17
Ciapin1	2.20784e-21	-0.661868	0.148	0.225	1.75413e-17
Ttc7	2.32929e-21	0.484253	0.356	0.265	1.85062e-17
Mtus1	2.55066e-21	0.177149	0.905	0.891	2.0265e-17
Pklr	2.74332e-21	-0.327778	0.5	0.582	2.17957e-17
Igf1os	2.88296e-21	0.96823	0.143	0.081	2.29051e-17
AC163685.1	2.93192e-21	0.509457	0.297	0.209	2.32941e-17
Ric8b	3.0388e-21	-0.542617	0.254	0.34	2.41433e-17
Zfp236	3.06635e-21	-0.400394	0.447	0.527	2.43621e-17
Eif2s2	3.10303e-21	-0.498854	0.258	0.347	2.46536e-17
Sik1	3.16168e-21	0.676923	0.314	0.234	2.51196e-17
Ell2	3.27955e-21	0.271927	0.85	0.81	2.6056e-17
Pgap1	3.48743e-21	0.556275	0.321	0.236	2.77076e-17
Dst	3.50824e-21	-0.444099	0.377	0.465	2.78729e-17
Them4	3.63607e-21	-0.493465	0.315	0.405	2.88886e-17
Slc4a4	3.6907e-21	0.215786	0.73	0.655	2.93226e-17
Acad10	4.17909e-21	0.680715	0.185	0.113	3.32029e-17
Serpina3k	4.53709e-21	0.356701	0.915	0.889	3.60472e-17
Zranb1	4.57287e-21	-0.253454	0.767	0.816	3.63315e-17
Hmgcs1	4.85672e-21	0.76676	0.243	0.164	3.85867e-17
Ints6	5.27193e-21	-0.39388	0.551	0.629	4.18855e-17
Gm49980	5.29997e-21	-0.315758	0.65	0.712	4.21083e-17
Arl15	5.6973e-21	-0.269343	0.79	0.833	4.5265e-17
Cpne8	6.155e-21	-1.30716	0.06	0.114	4.89015e-17
Grb14	6.19349e-21	0.250501	0.78	0.72	4.92073e-17
1810008I18Rik	6.29894e-21	0.687092	0.225	0.148	5.00451e-17
Wdr43	6.81251e-21	-0.614663	0.194	0.274	5.41254e-17
Serpina3m	6.82865e-21	0.444916	0.431	0.341	5.42536e-17
Pnpla8	6.85347e-21	0.366137	0.582	0.505	5.44508e-17
Ptk2b	7.54725e-21	0.420282	0.354	0.263	5.99629e-17
Abhd14b	7.68991e-21	0.487141	0.34	0.251	6.10963e-17
Slc25a32	8.18543e-21	0.490385	0.421	0.333	6.50332e-17
Sash1	8.26343e-21	0.364121	0.548	0.457	6.5653e-17
Desi2	8.36464e-21	-0.331591	0.582	0.659	6.64571e-17
Tmem19	8.46468e-21	0.466588	0.377	0.286	6.72519e-17
Dync1h1	8.96031e-21	-0.543788	0.27	0.357	7.11897e-17
Enpp3	8.96467e-21	0.338389	0.532	0.436	7.12243e-17
Gm17178	9.62165e-21	0.719974	0.195	0.122	7.6444e-17
Gm40264	1.15938e-20	0.695682	0.166	0.098	9.2113e-17
Ptpn3	1.3293e-20	0.472186	0.39	0.302	1.05613e-16
Cd81	1.36802e-20	0.779325	0.191	0.121	1.08689e-16
Zfp707	1.4259e-20	0.581757	0.287	0.204	1.13288e-16
Chd7	1.621e-20	-0.339238	0.626	0.683	1.28788e-16
Zc3h6	1.78519e-20	0.741047	0.178	0.109	1.41833e-16
Aldh9a1	2.14238e-20	0.630539	0.265	0.186	1.70212e-16
F12	2.27979e-20	-0.330303	0.532	0.61	1.81129e-16
Ar	2.28573e-20	0.466386	0.345	0.255	1.81601e-16
Dhx16	2.50933e-20	-0.693076	0.147	0.22	1.99366e-16
Ubr5	2.59529e-20	-0.297708	0.635	0.699	2.06196e-16
Nisch	3.04354e-20	-0.377137	0.557	0.626	2.41809e-16
Slc20a1	3.0882e-20	-0.580525	0.173	0.253	2.45358e-16
Kansl1	3.29921e-20	-0.203498	0.865	0.899	2.62122e-16
Gm48678	3.37432e-20	0.493947	0.34	0.253	2.6809e-16
Mblac2	3.39329e-20	0.804466	0.157	0.093	2.69597e-16
Nostrin	3.47056e-20	0.698247	0.212	0.139	2.75736e-16
Gm31583	4.08336e-20	0.826265	0.251	0.179	3.24423e-16
Zfhx4	4.26407e-20	0.290076	0.675	0.597	3.3878e-16
Epn1	4.30827e-20	-0.592102	0.259	0.338	3.42292e-16
Aldh4a1	4.74974e-20	0.377624	0.414	0.321	3.77367e-16
Pan3	4.90389e-20	-0.274274	0.698	0.745	3.89614e-16
Crebrf	4.93948e-20	0.403083	0.436	0.343	3.92441e-16
Cep85	5.21135e-20	0.236711	0.817	0.761	4.14042e-16
Hdac11	5.86059e-20	0.850919	0.145	0.083	4.65624e-16
Gm26749	6.09449e-20	0.463166	0.348	0.258	4.84207e-16
Slc22a18	6.59271e-20	0.713519	0.178	0.11	5.23791e-16
Hnrnpl	6.65707e-20	-0.517984	0.279	0.36	5.28904e-16
Inpp5a	6.70657e-20	-0.69738	0.136	0.207	5.32837e-16
Btbd9	7.15331e-20	-0.31912	0.586	0.665	5.6833e-16
Gm33543	7.90751e-20	0.586421	0.25	0.173	6.28252e-16
Ncln	8.00107e-20	-0.861185	0.075	0.134	6.35685e-16
Trim2	8.17376e-20	0.46792	0.363	0.274	6.49405e-16
Otulin	8.39634e-20	-0.410925	0.412	0.495	6.67089e-16
Mthfd1	8.75991e-20	0.349874	0.519	0.429	6.95975e-16
Sfi1	9.00786e-20	-0.565807	0.232	0.314	7.15675e-16
Apobec1	1.03465e-19	-0.358185	0.354	0.443	8.22032e-16
Ugt2a3	1.069e-19	0.46641	0.526	0.449	8.49324e-16
Slc25a33	1.11687e-19	0.638446	0.228	0.154	8.87357e-16
Dusp11	1.23145e-19	-0.409861	0.358	0.445	9.7839e-16
Mettl7b	1.23318e-19	-0.334319	0.544	0.622	9.79759e-16
Ubc	1.31115e-19	0.38686	0.629	0.565	1.04171e-15
Hspa4	1.31432e-19	-0.432238	0.4	0.48	1.04423e-15
Stub1	1.32391e-19	-0.64472	0.173	0.248	1.05185e-15
Slc15a4	1.36821e-19	0.488987	0.349	0.264	1.08704e-15
Pex14	1.38876e-19	-0.266548	0.642	0.703	1.10337e-15
Aldh1a1	1.43643e-19	0.270921	0.528	0.435	1.14124e-15
2610203C22Rik	1.62136e-19	1.02335	0.109	0.056	1.28817e-15
Atxn7	1.70755e-19	-0.313122	0.596	0.667	1.35665e-15
Fdx1	2.13519e-19	0.687258	0.292	0.217	1.69641e-15
Hykk	2.41924e-19	0.278905	0.71	0.644	1.92209e-15
Tmc7	2.44206e-19	0.615589	0.243	0.168	1.94021e-15
Dock4	2.59621e-19	-0.243089	0.78	0.834	2.06269e-15
Atp13a1	2.69042e-19	-0.790077	0.106	0.17	2.13754e-15
Arhgef7	2.71691e-19	0.588706	0.277	0.198	2.15858e-15
Tuft1	2.92699e-19	-0.739718	0.135	0.204	2.3255e-15
Prpf6	3.26223e-19	-0.413637	0.369	0.455	2.59184e-15
Cyp26b1	3.4592e-19	-3.63817	0.001	0.021	2.74833e-15
Map7	3.55144e-19	-0.260117	0.679	0.733	2.82162e-15
Sidt2	3.55792e-19	-0.544039	0.203	0.282	2.82677e-15
AC149090.1	3.5728e-19	-0.183065	0.873	0.895	2.83859e-15
Copa	3.66033e-19	-0.347486	0.479	0.558	2.90813e-15
Cox7c	3.71314e-19	0.472909	0.384	0.298	2.95009e-15
Shank2	4.09958e-19	-0.43344	0.331	0.417	3.25711e-15
Akap13	4.42081e-19	-0.188601	0.905	0.922	3.51233e-15
Por	4.47114e-19	0.387452	0.498	0.413	3.55232e-15
N4bp2	4.70423e-19	0.504113	0.349	0.265	3.73751e-15
Eif3b	5.03382e-19	-0.662518	0.128	0.198	3.99937e-15
Fam13b	5.49927e-19	0.346844	0.547	0.459	4.36917e-15
Nup98	5.5715e-19	-0.354514	0.425	0.507	4.42656e-15
Sult1d1	5.71442e-19	0.710948	0.236	0.162	4.54011e-15
Wwc2	5.97119e-19	-0.556488	0.26	0.338	4.74411e-15
Stard10	6.5892e-19	-0.342795	0.588	0.653	5.23512e-15
Atf7	6.7897e-19	-0.321609	0.508	0.589	5.39442e-15
Mettl15	6.88374e-19	0.821364	0.156	0.094	5.46913e-15
Tmem205	7.27242e-19	0.477679	0.389	0.307	5.77794e-15
Cd59a	7.34481e-19	0.847695	0.136	0.079	5.83545e-15
Cars	7.69686e-19	-0.730131	0.125	0.193	6.11516e-15
Gm47167	8.24227e-19	0.558736	0.265	0.187	6.54848e-15
Gpcpd1	8.85344e-19	0.308803	0.648	0.569	7.03406e-15
Zswim8	9.11483e-19	-0.553884	0.205	0.284	7.24174e-15
Ppfia1	9.17967e-19	-0.501812	0.281	0.364	7.29325e-15
Lipa	9.3887e-19	0.45355	0.39	0.308	7.45932e-15
S100a10	1.00923e-18	0.772723	0.175	0.11	8.01835e-15
Ergic1	1.01046e-18	-0.471281	0.283	0.365	8.02807e-15
Slmap	1.01416e-18	-0.284648	0.656	0.711	8.05751e-15
Aven	1.02702e-18	-0.471848	0.324	0.404	8.1597e-15
Foxq1	1.219e-18	1.14786	0.133	0.078	9.68495e-15
Mark2	1.22078e-18	-0.410663	0.386	0.462	9.69909e-15
Pdcd11	1.22687e-18	-0.687202	0.135	0.203	9.74744e-15
Gm20319	1.23848e-18	-0.280814	0.696	0.759	9.83972e-15
Crem	1.47401e-18	-0.369958	0.393	0.48	1.1711e-14
Foxp1	1.53624e-18	-0.160704	0.964	0.976	1.22054e-14
Eif4e	1.57735e-18	-0.534176	0.24	0.318	1.25321e-14
Bcl9	1.59687e-18	0.691004	0.15	0.089	1.26871e-14
Ddi2	1.61289e-18	-0.171027	0.899	0.916	1.28144e-14
Fam124a	1.65049e-18	-0.822554	0.153	0.221	1.31132e-14
Gstp1	1.70825e-18	-0.67756	0.113	0.178	1.3572e-14
Vps13a	1.73106e-18	-0.329589	0.488	0.57	1.37533e-14
Nxpe2	1.97858e-18	0.910572	0.087	0.041	1.57198e-14
Dnajc19	2.03959e-18	0.413074	0.346	0.261	1.62046e-14
N4bp2l1	2.06235e-18	0.323728	0.562	0.478	1.63854e-14
Ncor1	2.07008e-18	-0.195371	0.845	0.876	1.64468e-14
Cd1d1	2.2011e-18	0.321646	0.428	0.332	1.74878e-14
Cdip1	2.29439e-18	0.256759	0.751	0.687	1.8229e-14
Ccar1	2.37673e-18	-0.296514	0.579	0.65	1.88831e-14
1500035N22Rik	2.43693e-18	0.723571	0.156	0.095	1.93614e-14
Gm30262	2.46703e-18	-0.695392	0.161	0.231	1.96006e-14
E4f1	2.47719e-18	-0.847552	0.084	0.142	1.96813e-14
Creb3l2	2.56544e-18	0.331348	0.493	0.402	2.03824e-14
Cux1	2.67092e-18	-0.321249	0.544	0.616	2.12205e-14
Gpatch2	3.14128e-18	-0.347601	0.556	0.618	2.49574e-14
Qdpr	3.19328e-18	0.565204	0.27	0.193	2.53706e-14
Ceacam1	3.23933e-18	0.58192	0.253	0.179	2.57364e-14
Dgkq	3.28259e-18	-0.677201	0.172	0.243	2.60802e-14
Pparg	3.40388e-18	0.839092	0.129	0.074	2.70439e-14
Fpgs	3.4437e-18	-0.259628	0.697	0.753	2.73602e-14
Rps23	3.45258e-18	0.808798	0.166	0.104	2.74307e-14
Adh4	3.78208e-18	0.491988	0.295	0.216	3.00486e-14
Erg28	3.99874e-18	0.72211	0.201	0.133	3.177e-14
Pam	4.38839e-18	-0.920944	0.066	0.119	3.48658e-14
Gm2788	4.39589e-18	-0.650449	0.22	0.292	3.49253e-14
Fnbp4	4.41061e-18	-0.405396	0.387	0.469	3.50423e-14
Trip11	4.64397e-18	-0.294947	0.554	0.626	3.68964e-14
Il6st	5.46797e-18	0.476303	0.376	0.296	4.3443e-14
Helz2	6.37014e-18	-0.549221	0.218	0.295	5.06107e-14
Gm48321	6.38019e-18	0.343396	0.438	0.352	5.06906e-14
Baz1b	6.69837e-18	-0.401841	0.417	0.5	5.32185e-14
Myo6	7.68343e-18	-0.253137	0.751	0.799	6.10448e-14
Slc25a15	7.70198e-18	0.48189	0.48	0.413	6.11922e-14
Taok3	7.70354e-18	0.241458	0.796	0.769	6.12046e-14
Ppp1r10	7.72648e-18	-0.380927	0.353	0.441	6.13869e-14
Usp50	7.87923e-18	0.409195	0.309	0.228	6.26005e-14
Nars	7.92162e-18	-0.621194	0.157	0.227	6.29373e-14
Bri3	8.01108e-18	0.238877	0.724	0.641	6.3648e-14
Insyn2a	8.02586e-18	0.847907	0.175	0.113	6.37655e-14
Dbt	8.0608e-18	0.709331	0.139	0.081	6.4043e-14
Selenbp1	8.44575e-18	0.489693	0.285	0.208	6.71015e-14
Mrpl38	8.59407e-18	-0.745387	0.121	0.186	6.82799e-14
Rbfox2	8.62574e-18	-0.233885	0.766	0.815	6.85315e-14
Utp20	9.42598e-18	-0.576934	0.192	0.264	7.48894e-14
Phyh	1.01536e-17	0.226954	0.887	0.86	8.06703e-14
Spin1	1.03303e-17	-0.44245	0.278	0.358	8.20741e-14
Ido2	1.05959e-17	0.307194	0.526	0.435	8.41842e-14
Arf1	1.07374e-17	-0.533898	0.203	0.277	8.5309e-14
Macf1	1.11129e-17	-0.193586	0.85	0.882	8.82924e-14
Mthfs	1.11923e-17	0.463278	0.345	0.265	8.89225e-14
Mapkapk2	1.23812e-17	0.497211	0.441	0.368	9.83684e-14
Pctp	1.23976e-17	0.702633	0.14	0.082	9.8499e-14
Cab39l	1.2448e-17	0.341653	0.579	0.507	9.88993e-14
Neb	1.39721e-17	0.390392	0.474	0.397	1.11009e-13
Prrc2a	1.42965e-17	-0.684323	0.113	0.176	1.13585e-13
D830024N08Rik	1.48478e-17	0.646772	0.222	0.153	1.17966e-13
Cox10	1.53055e-17	-0.497617	0.172	0.245	1.21603e-13
Degs1	1.61953e-17	0.721017	0.164	0.103	1.28672e-13
Slc39a7	1.65037e-17	-0.95446	0.067	0.118	1.31122e-13
Prox1os	1.69082e-17	0.398981	0.471	0.389	1.34335e-13
Dock7	1.71569e-17	0.432033	0.344	0.263	1.36312e-13
Eif5b	1.75175e-17	-0.401229	0.359	0.442	1.39177e-13
Asl	1.80249e-17	0.223367	0.807	0.753	1.43208e-13
Rai1	1.86094e-17	-0.432164	0.322	0.402	1.47852e-13
Gfod1	2.15712e-17	0.828373	0.136	0.081	1.71383e-13
0610040J01Rik	2.2793e-17	-0.359411	0.567	0.628	1.8109e-13
Sh3d19	2.28664e-17	0.204012	0.848	0.825	1.81674e-13
Gckr	2.3788e-17	-0.233613	0.829	0.859	1.88996e-13
Mcu	2.52832e-17	-0.381685	0.457	0.529	2.00875e-13
Adipor2	2.61579e-17	-0.248485	0.929	0.934	2.07824e-13
Nrn1	2.62805e-17	0.434814	0.258	0.183	2.08799e-13
Aen	2.79443e-17	-0.779041	0.087	0.143	2.22018e-13
Smg5	2.85654e-17	-0.678012	0.128	0.193	2.26952e-13
Apol9b	3.06389e-17	-0.714084	0.084	0.141	2.43426e-13
Cfi	3.14017e-17	0.424126	0.371	0.29	2.49487e-13
Dennd4a	3.26951e-17	0.334343	0.577	0.507	2.59763e-13
Gspt1	3.48748e-17	-0.436309	0.326	0.406	2.77081e-13
Narf	3.52227e-17	0.688582	0.22	0.151	2.79845e-13
Xdh	3.58971e-17	0.283727	0.605	0.532	2.85203e-13
Gm47271	3.62227e-17	0.776859	0.157	0.098	2.8779e-13
Stim2	3.72265e-17	-0.467808	0.327	0.404	2.95765e-13
Gm49417	4.01779e-17	0.449976	0.354	0.274	3.19213e-13
Cebpd	4.209e-17	1.17404	0.078	0.037	3.34405e-13
Farsa	4.37326e-17	-0.71381	0.103	0.163	3.47455e-13
Snrnp70	4.53157e-17	-0.25954	0.681	0.734	3.60033e-13
Slco1a1	4.60777e-17	0.147428	0.932	0.888	3.66088e-13
Kmo	4.80587e-17	0.246273	0.803	0.744	3.81826e-13
Chchd10	4.936e-17	0.690729	0.213	0.147	3.92165e-13
Ipmk	5.61404e-17	0.555007	0.315	0.241	4.46035e-13
Sft2d1	5.65533e-17	0.628646	0.199	0.134	4.49316e-13
Grina	5.66728e-17	-0.505122	0.271	0.346	4.50265e-13
Ccser2	6.28897e-17	-0.398065	0.337	0.415	4.99659e-13
Ube2d3	6.67832e-17	-0.253819	0.616	0.68	5.30593e-13
Skap2	6.93738e-17	-0.372099	0.427	0.507	5.51175e-13
Dazap1	7.00469e-17	-0.363128	0.468	0.541	5.56523e-13
Fes	7.12196e-17	-1.25178	0.026	0.062	5.6584e-13
Pcbp4	7.13114e-17	-0.832409	0.087	0.142	5.66569e-13
Aspa	7.32203e-17	0.530283	0.252	0.181	5.81735e-13
Edc4	7.35748e-17	-0.931683	0.08	0.133	5.84552e-13
Hsd3b2	7.52509e-17	0.410818	0.428	0.35	5.97868e-13
Skiv2l	7.75986e-17	-0.815977	0.102	0.16	6.16521e-13
Smg1	8.05112e-17	0.252685	0.752	0.711	6.39662e-13
Platr4	8.3852e-17	0.6732	0.238	0.173	6.66204e-13
Pcsk6	8.65124e-17	0.308373	0.584	0.514	6.87341e-13
Polr1a	9.06733e-17	-0.554151	0.188	0.258	7.204e-13
Hsph1	9.17675e-17	-0.602817	0.167	0.235	7.29093e-13
Srd5a1	9.5309e-17	0.467283	0.288	0.212	7.5723e-13
Cyc1	9.71398e-17	-0.609885	0.124	0.187	7.71776e-13
Efna1	9.74196e-17	0.54045	0.301	0.228	7.73998e-13
Pdgfrl	1.0233e-16	-0.684563	0.139	0.204	8.13012e-13
Vps13d	1.02914e-16	-0.210649	0.765	0.801	8.17655e-13
Caprin1	1.07782e-16	-0.22933	0.749	0.8	8.56328e-13
Dapk2	1.13985e-16	0.478705	0.248	0.175	9.05613e-13
Ivns1abp	1.18142e-16	0.332822	0.604	0.532	9.38641e-13
Nbr1	1.21907e-16	0.252139	0.709	0.645	9.68551e-13
Rngtt	1.25261e-16	-0.394455	0.36	0.437	9.952e-13
Pced1b	1.37292e-16	0.774447	0.136	0.081	1.09078e-12
N4bp2l2	1.38133e-16	-0.305743	0.575	0.639	1.09747e-12
Calcoco1	1.41423e-16	0.744871	0.159	0.1	1.12361e-12
Ndor1	1.66221e-16	-0.984465	0.072	0.122	1.32062e-12
Rpl23	1.71669e-16	0.569035	0.267	0.196	1.36391e-12
Hacl1	1.78324e-16	0.266083	0.815	0.747	1.41678e-12
Taok2	1.81845e-16	-0.589865	0.194	0.263	1.44476e-12
Nup93	2.097e-16	-1.06268	0.056	0.102	1.66607e-12
Zfp131	2.10533e-16	-0.575625	0.152	0.219	1.67268e-12
Smg7	2.11866e-16	-0.359791	0.392	0.468	1.68328e-12
Trmt9b	2.19807e-16	0.706237	0.147	0.091	1.74637e-12
Crebbp	2.29768e-16	-0.196457	0.801	0.842	1.82551e-12
Atp11a	2.36081e-16	-1.11614	0.05	0.094	1.87566e-12
Mef2d	2.40739e-16	-0.364328	0.307	0.388	1.91267e-12
Aldh3a2	2.45927e-16	0.390955	0.283	0.207	1.95389e-12
Calr	2.53638e-16	-0.340384	0.37	0.449	2.01515e-12
Prmt3	2.70077e-16	-0.683854	0.126	0.187	2.14576e-12
Clcn7	2.7153e-16	-0.6917	0.129	0.19	2.15731e-12
Dmxl1	2.72216e-16	-0.271999	0.679	0.72	2.16275e-12
Gnpnat1	2.75478e-16	0.576243	0.218	0.151	2.18867e-12
Slc27a5	3.09143e-16	0.455291	0.296	0.221	2.45614e-12
Thoc2	3.18797e-16	-0.246748	0.665	0.725	2.53284e-12
Nat8f1	3.26372e-16	0.504611	0.302	0.228	2.59302e-12
Efna5	3.47523e-16	-0.457999	0.386	0.456	2.76107e-12
Cstf3	3.5997e-16	-0.280886	0.574	0.639	2.85996e-12
Npas2	3.65232e-16	1.04265	0.072	0.033	2.90177e-12
Echdc3	3.73613e-16	0.529739	0.27	0.199	2.96836e-12
Sfxn2	3.78338e-16	0.490009	0.291	0.218	3.0059e-12
Uba5	4.16414e-16	-0.618469	0.166	0.232	3.30841e-12
2001-03-01	4.19792e-16	0.190934	0.872	0.829	3.33525e-12
Masp1	4.23808e-16	0.292341	0.552	0.471	3.36715e-12
Inpp5b	4.34972e-16	0.390594	0.362	0.283	3.45586e-12
Rpl24	4.5017e-16	0.725264	0.195	0.132	3.5766e-12
Idh2	4.64218e-16	0.870248	0.103	0.057	3.68821e-12
Slc30a9	5.07242e-16	-0.300053	0.49	0.557	4.03004e-12
Micu1	5.18285e-16	-0.548654	0.195	0.263	4.11778e-12
Ube3a	5.32029e-16	-0.248652	0.712	0.75	4.22697e-12
H2-Q6	5.42625e-16	-0.925965	0.067	0.116	4.31116e-12
Ttc3	5.51146e-16	0.571654	0.204	0.14	4.37885e-12
Ttc27	6.08869e-16	-0.53103	0.191	0.258	4.83746e-12
Naa60	6.41905e-16	-0.547285	0.17	0.238	5.09994e-12
Arntl	6.45747e-16	0.459772	0.319	0.243	5.13046e-12
Pde4b	6.64514e-16	0.410736	0.27	0.195	5.27956e-12
Dsg2	6.73451e-16	0.457432	0.301	0.226	5.35057e-12
Psd3	6.76906e-16	0.170477	0.898	0.882	5.37802e-12
4732419C18Rik	6.80545e-16	0.599331	0.245	0.178	5.40693e-12
Iyd	6.8277e-16	0.82162	0.139	0.086	5.42461e-12
Sqor	7.27062e-16	0.56256	0.213	0.148	5.77651e-12
Tasor	7.32697e-16	-0.274512	0.634	0.688	5.82127e-12
Nr1i3	7.55071e-16	0.541699	0.336	0.266	5.99904e-12
Erp44	7.60474e-16	-0.354204	0.435	0.506	6.04197e-12
Top1	7.66519e-16	-0.262777	0.66	0.709	6.08999e-12
Rassf8	8.00323e-16	0.438836	0.357	0.282	6.35856e-12
Rmnd5a	8.06418e-16	0.269264	0.672	0.613	6.40699e-12
Rpl7	8.22685e-16	0.899336	0.123	0.074	6.53623e-12
Ahctf1	8.2392e-16	0.320749	0.509	0.435	6.54605e-12
Plg	8.56794e-16	0.165182	0.905	0.89	6.80723e-12
Mup10	8.6804e-16	-0.510194	0.179	0.248	6.89657e-12
Rab11fip2	9.22716e-16	0.750158	0.147	0.092	7.33098e-12
Nr1h3	9.34393e-16	-0.497646	0.203	0.274	7.42376e-12
Nr2f6	9.60596e-16	-0.549948	0.177	0.246	7.63194e-12
Zfp809	1.07881e-15	-0.228303	0.522	0.602	8.57112e-12
Irf9	1.18023e-15	-0.711991	0.112	0.171	9.37695e-12
C9orf72	1.2602e-15	0.532086	0.274	0.206	1.00123e-11
Wdr33	1.28067e-15	-0.245026	0.619	0.676	1.01749e-11
Dlat	1.30451e-15	0.512839	0.31	0.239	1.03643e-11
Ak3	1.3234e-15	0.423611	0.336	0.261	1.05144e-11
Cutal	1.32381e-15	0.540284	0.236	0.168	1.05177e-11
Fam107b	1.34772e-15	0.385662	0.352	0.278	1.07076e-11
Klf9	1.43604e-15	0.251854	0.623	0.548	1.14093e-11
Ror1	1.62432e-15	0.309842	0.608	0.547	1.29052e-11
Fdft1	1.70293e-15	0.565097	0.21	0.146	1.35298e-11
Nol10	1.70786e-15	-0.608906	0.116	0.175	1.3569e-11
Pigr	1.74637e-15	0.55187	0.244	0.177	1.38749e-11
Gapvd1	1.84599e-15	-0.284273	0.574	0.634	1.46664e-11
Ppara	2.03884e-15	-0.162136	0.946	0.969	1.61986e-11
Agtpbp1	2.03896e-15	-0.66387	0.121	0.18	1.61995e-11
Herc1	2.12509e-15	-0.262399	0.627	0.692	1.68839e-11
Diaph2	2.13101e-15	-0.27597	0.809	0.841	1.69309e-11
Sclt1	2.17022e-15	0.533935	0.249	0.182	1.72424e-11
Sec24a	2.18043e-15	-0.177896	0.852	0.887	1.73235e-11
Fer	2.21637e-15	-0.433242	0.266	0.34	1.76091e-11
4930551O13Rik	2.24737e-15	0.705443	0.171	0.114	1.78554e-11
Ahcyl2	2.44588e-15	-0.386835	0.473	0.533	1.94325e-11
Tead1	2.4797e-15	-0.549309	0.311	0.376	1.97012e-11
Dalrd3	2.49627e-15	-0.624127	0.14	0.202	1.98329e-11
Lars	2.50685e-15	-0.395829	0.298	0.375	1.99169e-11
Il31ra	2.55244e-15	-1.01546	0.062	0.108	2.02792e-11
Ola1	2.56743e-15	-0.437037	0.235	0.308	2.03982e-11
Pdpk1	2.5705e-15	-0.371747	0.344	0.418	2.04226e-11
Cables2	2.64517e-15	-0.888451	0.066	0.113	2.10159e-11
Srrm1	2.65982e-15	-0.328914	0.445	0.517	2.11323e-11
Abcg8	2.81983e-15	0.40019	0.44	0.364	2.24035e-11
Zfp106	2.96504e-15	-0.363127	0.383	0.456	2.35573e-11
Ddx60	2.97714e-15	-0.703613	0.065	0.113	2.36533e-11
Stxbp2	2.98362e-15	-0.905109	0.068	0.115	2.37049e-11
Psmd3	3.01414e-15	-0.70803	0.102	0.158	2.39474e-11
Erc1	3.17473e-15	-0.226762	0.763	0.807	2.52232e-11
Rpl13a	3.34884e-15	-0.574579	0.202	0.268	2.66065e-11
4632427E13Rik	3.3828e-15	-0.348963	0.5	0.554	2.68764e-11
Qrich1	3.60759e-15	-0.317723	0.433	0.508	2.86623e-11
Slc25a39	3.66424e-15	-0.65761	0.122	0.181	2.91124e-11
4930402H24Rik	3.68605e-15	-0.286254	0.58	0.64	2.92857e-11
Itsn2	3.93294e-15	-0.351299	0.462	0.525	3.12472e-11
Setd5	3.98258e-15	-0.244452	0.718	0.76	3.16416e-11
Hnrnpul2	4.35329e-15	-0.6157	0.17	0.233	3.45869e-11
Ulk1	4.42726e-15	-0.304484	0.384	0.462	3.51745e-11
Crybg3	4.44355e-15	-0.705768	0.14	0.198	3.5304e-11
6430590A07Rik	4.67353e-15	0.561735	0.218	0.153	3.71312e-11
Dnajb6	4.69057e-15	-0.346817	0.418	0.488	3.72665e-11
Maged1	4.73842e-15	-0.808441	0.065	0.112	3.76468e-11
Ddx39b	4.91428e-15	-0.436468	0.336	0.407	3.9044e-11
Rpl9	5.08773e-15	0.626563	0.213	0.151	4.0422e-11
Fmn1	5.1419e-15	0.558812	0.254	0.189	4.08524e-11
Fam207a	5.22407e-15	-0.511985	0.179	0.246	4.15053e-11
Ing4	5.2797e-15	0.442377	0.298	0.226	4.19472e-11
Mast2	5.78957e-15	-0.354263	0.45	0.517	4.59981e-11
Acer3	5.85136e-15	-0.481918	0.254	0.324	4.6489e-11
Pxmp4	6.071e-15	-0.237579	0.678	0.726	4.82341e-11
Sec24c	6.18455e-15	-0.484986	0.326	0.394	4.91362e-11
Pemt	6.4996e-15	0.305376	0.426	0.343	5.16393e-11
Pdilt	6.80305e-15	-0.664717	0.159	0.221	5.40502e-11
Psmd2	6.88943e-15	-0.715314	0.111	0.167	5.47365e-11
Elovl6	7.02962e-15	-0.257951	0.653	0.71	5.58503e-11
Cmtr1	7.0714e-15	-0.58003	0.167	0.231	5.61823e-11
Arl13b	7.18019e-15	0.641763	0.131	0.08	5.70466e-11
Fbxw5	7.44288e-15	-0.803855	0.073	0.122	5.91337e-11
Fam193a	7.52327e-15	-0.227312	0.709	0.761	5.97724e-11
Fam20a	8.34448e-15	0.287639	0.557	0.489	6.62969e-11
Ublcp1	9.23485e-15	-0.560781	0.165	0.227	7.33709e-11
Tut7	9.83308e-15	-0.334393	0.556	0.602	7.81238e-11
Sigmar1	9.97019e-15	0.618349	0.193	0.133	7.92132e-11
Mosmo	1.0041e-14	-0.502179	0.193	0.258	7.97759e-11
Prr14l	1.04352e-14	-0.319998	0.435	0.504	8.29078e-11
Psmd14	1.05568e-14	-0.333072	0.418	0.493	8.38739e-11
Yy1	1.11176e-14	-0.3896	0.352	0.42	8.8329e-11
C8a	1.12439e-14	-0.184308	0.868	0.902	8.9333e-11
Sc5d	1.15312e-14	0.272811	0.65	0.581	9.16156e-11
Sfswap	1.19331e-14	-0.411326	0.361	0.43	9.48082e-11
Lrp1	1.28075e-14	-0.300351	0.625	0.674	1.01756e-10
Ptpre	1.29271e-14	1.17519	0.068	0.033	1.02706e-10
Mfhas1	1.3229e-14	-0.466475	0.27	0.34	1.05105e-10
Il18	1.37582e-14	1.02994	0.091	0.049	1.09309e-10
Bdh1	1.37942e-14	-0.460085	0.3	0.367	1.09595e-10
Slc41a2	1.40165e-14	-0.626537	0.147	0.209	1.11361e-10
Apex2	1.42725e-14	0.484712	0.374	0.303	1.13395e-10
Apof	1.46979e-14	0.55	0.244	0.18	1.16775e-10
Nrbf2	1.54175e-14	0.455352	0.325	0.255	1.22492e-10
Ppp4r3a	1.63894e-14	-0.230298	0.617	0.673	1.30214e-10
Mup20	1.66014e-14	0.336415	0.945	0.908	1.31898e-10
Nxf1	1.69992e-14	-0.479458	0.171	0.236	1.35059e-10
Plce1	1.74877e-14	-0.408896	0.282	0.353	1.3894e-10
Acss2	1.75643e-14	0.35107	0.545	0.477	1.39548e-10
Prdm15	1.78225e-14	-0.513301	0.153	0.215	1.41599e-10
Cry2	1.78729e-14	0.51047	0.202	0.141	1.42e-10
Cox4i1	1.90653e-14	0.501869	0.263	0.198	1.51474e-10
Pts	2.0092e-14	0.607123	0.19	0.132	1.59631e-10
Dcun1d3	2.10363e-14	-0.477517	0.234	0.303	1.67133e-10
Srpk1	2.15227e-14	-0.559117	0.165	0.227	1.70998e-10
Lin7a	2.24704e-14	0.335593	0.416	0.339	1.78527e-10
Khnyn	2.35092e-14	0.414867	0.272	0.203	1.86781e-10
Prkg1	2.4223e-14	1.00365	0.109	0.064	1.92452e-10
Dhcr24	2.5293e-14	0.382	0.396	0.32	2.00953e-10
Grn	2.5931e-14	-0.685507	0.134	0.192	2.06022e-10
Med13l	2.72746e-14	-0.305867	0.509	0.575	2.16697e-10
Rev1	2.88125e-14	-0.334336	0.384	0.46	2.28915e-10
Serpinf1	3.09252e-14	0.622288	0.213	0.153	2.45701e-10
Sh3bp5	3.2783e-14	0.350128	0.412	0.337	2.60461e-10
Nr1d1	3.33303e-14	0.526187	0.226	0.163	2.6481e-10
E130102H24Rik	3.35296e-14	0.31762	0.567	0.493	2.66392e-10
Atp9b	3.64883e-14	-0.275686	0.572	0.631	2.899e-10
Fam126a	3.74353e-14	0.605634	0.139	0.087	2.97424e-10
Etnk1	4.09584e-14	-0.416666	0.338	0.405	3.25415e-10
Ap1b1	4.16606e-14	-0.673986	0.131	0.187	3.30993e-10
Cpne1	4.23999e-14	-0.399474	0.347	0.414	3.36867e-10
Cst3	4.25353e-14	1.19143	0.071	0.035	3.37943e-10
Gm15408	4.28185e-14	0.649482	0.153	0.1	3.40193e-10
Eif4e2	4.34789e-14	-0.629434	0.135	0.193	3.4544e-10
Mup9	4.38976e-14	-0.586143	0.14	0.199	3.48766e-10
Ino80	4.46251e-14	-0.286985	0.516	0.585	3.54547e-10
Atad3a	4.48316e-14	-0.378655	0.338	0.408	3.56187e-10
Gm15563	4.50619e-14	0.462181	0.299	0.229	3.58017e-10
Eif4g1	4.5728e-14	-0.266921	0.544	0.611	3.63309e-10
Hnmt	4.78796e-14	0.618455	0.121	0.073	3.80403e-10
1700112D23Rik	5.21552e-14	0.277006	0.481	0.4	4.14373e-10
Pex7	5.27541e-14	0.35624	0.473	0.405	4.19131e-10
Golgb1	5.32956e-14	0.290644	0.543	0.474	4.23433e-10
Rell1	5.36772e-14	0.428503	0.352	0.285	4.26465e-10
Wdr70	5.38291e-14	-0.438312	0.278	0.346	4.27672e-10
Uso1	5.50993e-14	-0.312352	0.5	0.564	4.37764e-10
Cct3	5.59055e-14	-0.564629	0.13	0.187	4.44169e-10
Csde1	5.71756e-14	-0.276963	0.471	0.542	4.5426e-10
Ubb	6.09236e-14	0.559059	0.243	0.181	4.84038e-10
Zmym4	6.20104e-14	-0.362761	0.398	0.467	4.92673e-10
Gm15952	6.26061e-14	0.846961	0.128	0.08	4.97406e-10
Gm12940	6.35165e-14	-0.528519	0.124	0.182	5.04638e-10
Pitpnc1	6.59405e-14	-0.279597	0.679	0.72	5.23897e-10
Tbc1d5	6.8493e-14	-0.204804	0.819	0.838	5.44177e-10
Mad1l1	6.96262e-14	-0.462542	0.261	0.329	5.5318e-10
Clec16a	7.34716e-14	-0.4812	0.239	0.303	5.83732e-10
Dlst	7.59205e-14	-0.340144	0.286	0.361	6.03189e-10
Adh5	7.99996e-14	0.519446	0.233	0.17	6.35597e-10
Tlk2	8.13184e-14	-0.263163	0.568	0.627	6.46075e-10
Adh1	8.17527e-14	0.255665	0.607	0.525	6.49525e-10
Gpd1	8.33732e-14	-0.48181	0.294	0.363	6.624e-10
Scfd1	8.65314e-14	-0.318464	0.358	0.429	6.87492e-10
Arfip2	8.78118e-14	-0.728083	0.105	0.157	6.97665e-10
Kat2b	8.79204e-14	0.215245	0.736	0.697	6.98528e-10
Slc9a8	8.92422e-14	-0.480892	0.254	0.319	7.09029e-10
Pex6	9.28223e-14	-0.505132	0.216	0.281	7.37473e-10
Hsd3b5	9.72117e-14	-0.581771	0.199	0.261	7.72347e-10
Cited2	9.83085e-14	0.817006	0.108	0.064	7.81061e-10
Als2	1.01676e-13	0.269305	0.608	0.542	8.07812e-10
Aox1	1.02306e-13	0.248128	0.585	0.517	8.12824e-10
Foxk2	1.06761e-13	-0.394791	0.292	0.362	8.48216e-10
Maml3	1.07333e-13	-0.353693	0.357	0.43	8.52762e-10
Ccnl1	1.07429e-13	0.254215	0.735	0.691	8.53527e-10
Bptf	1.09847e-13	-0.348814	0.424	0.493	8.72731e-10
Zscan26	1.10749e-13	0.367727	0.416	0.345	8.79898e-10
Aldh2	1.18586e-13	0.188106	0.607	0.525	9.42162e-10
Tomm70a	1.18794e-13	-0.342994	0.361	0.431	9.43815e-10
Mal2	1.22849e-13	-0.485559	0.177	0.241	9.76036e-10
Msmo1	1.23861e-13	0.515465	0.267	0.201	9.84074e-10
Wasl	1.26645e-13	0.302637	0.578	0.515	1.0062e-09
Tcaim	1.26941e-13	-0.462067	0.216	0.284	1.00854e-09
Gm29966	1.36721e-13	-0.202928	0.907	0.918	1.08625e-09
Ifi35	1.41065e-13	-0.669481	0.103	0.154	1.12076e-09
Ccdc171	1.42467e-13	-0.272654	0.422	0.497	1.1319e-09
Rps16	1.44801e-13	0.589033	0.189	0.132	1.15045e-09
Camta2	1.44858e-13	-0.579621	0.15	0.208	1.1509e-09
Nabp1	1.48812e-13	-0.485369	0.177	0.241	1.18231e-09
Rlf	1.50507e-13	-0.264535	0.527	0.594	1.19578e-09
St7	1.50556e-13	-0.399632	0.379	0.447	1.19617e-09
Arglu1	1.51395e-13	-0.263372	0.451	0.521	1.20283e-09
Nploc4	1.58525e-13	-0.298272	0.433	0.503	1.25948e-09
Trip12	1.64064e-13	-0.171552	0.859	0.888	1.30349e-09
Copg2	1.71459e-13	0.382939	0.297	0.227	1.36224e-09
Srebf1	1.83315e-13	-0.547133	0.205	0.267	1.45644e-09
Ccdc84	2.0583e-13	-0.498731	0.165	0.225	1.63532e-09
Xpo5	2.09106e-13	-0.649245	0.095	0.145	1.66135e-09
Fech	2.10534e-13	0.323633	0.448	0.381	1.6727e-09
Oaf	2.15834e-13	-0.241342	0.635	0.688	1.7148e-09
Hnf1aos1	2.17885e-13	-0.294474	0.668	0.722	1.7311e-09
Hist1h1e	2.18364e-13	0.620559	0.146	0.095	1.7349e-09
Gstz1	2.21178e-13	0.245374	0.647	0.592	1.75726e-09
Ttc17	2.26378e-13	-0.374704	0.386	0.453	1.79857e-09
Usp4	2.28117e-13	-0.521547	0.237	0.298	1.81239e-09
4930565N06Rik	2.32302e-13	0.707383	0.122	0.075	1.84564e-09
Kmt2b	2.44307e-13	-0.550077	0.136	0.194	1.94102e-09
Atad2b	2.45162e-13	-0.229579	0.601	0.662	1.94781e-09
Phf12	2.50644e-13	-0.343183	0.386	0.455	1.99137e-09
Trp53inp2	2.57846e-13	0.3458	0.477	0.407	2.04859e-09
Mob2	2.6449e-13	-0.507281	0.209	0.269	2.10138e-09
Ercc6	2.66672e-13	-0.441211	0.257	0.324	2.11871e-09
Tdrd3	2.71536e-13	-0.381138	0.358	0.423	2.15735e-09
Capzb	2.80874e-13	-0.532345	0.194	0.256	2.23155e-09
Tob2	2.86135e-13	-0.384062	0.353	0.421	2.27334e-09
Tnks	2.87253e-13	-0.329532	0.49	0.546	2.28222e-09
Mup17	3.01305e-13	-1.30892	0.15	0.198	2.39387e-09
Acaa2	3.03853e-13	-0.251165	0.647	0.69	2.41411e-09
Rangap1	3.12446e-13	-0.559466	0.143	0.199	2.48238e-09
2310001H17Rik	3.16076e-13	0.342202	0.342	0.273	2.51122e-09
Ppp3cc	3.17688e-13	0.71168	0.127	0.08	2.52403e-09
Ppp1r37	3.2448e-13	-0.551757	0.175	0.234	2.57799e-09
Prdx5	3.50613e-13	0.779271	0.105	0.062	2.78562e-09
Sarnp	3.55738e-13	-0.324238	0.453	0.516	2.82634e-09
Gm15886	3.61561e-13	0.657228	0.173	0.12	2.87261e-09
Phyhd1	3.62325e-13	0.382505	0.393	0.324	2.87868e-09
Pkd2l2	3.73855e-13	0.677777	0.141	0.092	2.97028e-09
Ephx2	3.85714e-13	-0.210462	0.794	0.824	3.0645e-09
Rpl30	4.10219e-13	0.567695	0.187	0.132	3.25919e-09
Phf20l1	4.1687e-13	-0.224987	0.662	0.702	3.31203e-09
Wsb2	4.20841e-13	0.553959	0.193	0.136	3.34358e-09
Heatr1	4.22373e-13	-0.615898	0.108	0.159	3.35575e-09
Dgat1	4.3616e-13	-0.778445	0.067	0.11	3.46529e-09
Ugt2b1	4.57794e-13	-0.561862	0.315	0.374	3.63717e-09
Nxpe4	4.81241e-13	1.2401	0.048	0.02	3.82346e-09
Plaa	4.96523e-13	-0.397447	0.269	0.336	3.94488e-09
Tcp1	4.97965e-13	0.387267	0.423	0.356	3.95633e-09
Med13	5.04745e-13	-0.231331	0.646	0.697	4.0102e-09
Alg6	5.13046e-13	0.672011	0.113	0.068	4.07615e-09
Abhd15	5.18785e-13	0.68386	0.124	0.077	4.12175e-09
Tlcd1	5.22615e-13	0.608001	0.203	0.147	4.15218e-09
F5	5.29042e-13	0.171216	0.743	0.695	4.20324e-09
Cfh	5.43076e-13	0.096234	0.893	0.845	4.31474e-09
Atp7b	5.5722e-13	0.574718	0.205	0.149	4.42711e-09
Tmem50a	5.66439e-13	0.385423	0.306	0.239	4.50036e-09
Bdp1	5.88626e-13	-0.348111	0.37	0.436	4.67663e-09
Ube2b	6.37021e-13	0.217831	0.71	0.648	5.06113e-09
Klhl2	6.40729e-13	-0.365521	0.366	0.43	5.09059e-09
Hint2	6.6551e-13	0.609844	0.157	0.106	5.28748e-09
Cenpv	6.74318e-13	0.415604	0.302	0.236	5.35746e-09
Ggact	6.96321e-13	0.257024	0.663	0.605	5.53227e-09
Cebpz	7.32415e-13	-0.445973	0.16	0.221	5.81904e-09
Nt5c2	7.48841e-13	0.315863	0.435	0.365	5.94954e-09
Btaf1	7.49835e-13	-0.292481	0.487	0.551	5.95744e-09
Zc3h13	8.28405e-13	-0.348166	0.364	0.431	6.58168e-09
Cat	8.43189e-13	0.166464	0.924	0.912	6.69914e-09
Gtf2h5	8.43303e-13	0.753845	0.119	0.074	6.70005e-09
Arhgap12	8.50688e-13	0.295546	0.508	0.441	6.75872e-09
Gm42047	8.52466e-13	-0.567135	0.163	0.22	6.77284e-09
3830406C13Rik	8.62898e-13	0.554743	0.181	0.128	6.85572e-09
Cpn2	8.8574e-13	0.598401	0.183	0.13	7.0372e-09
Parva	9.24589e-13	-0.330467	0.446	0.509	7.34586e-09
Abce1	9.31629e-13	-0.405766	0.228	0.294	7.40179e-09
Wdfy3	9.43456e-13	0.235073	0.685	0.641	7.49576e-09
Zfand4	9.53915e-13	0.225886	0.702	0.642	7.57886e-09
Rbis	1.0466e-12	0.723671	0.13	0.083	8.31521e-09
AI182371	1.05598e-12	0.189771	0.755	0.703	8.38977e-09
Scaf8	1.08165e-12	-0.216589	0.607	0.66	8.5937e-09
Ascc2	1.14794e-12	-0.470454	0.198	0.258	9.12041e-09
Rnf19a	1.15213e-12	-0.31437	0.456	0.522	9.1537e-09
Camk2d	1.20871e-12	-0.3229	0.409	0.478	9.60319e-09
Fmnl2	1.21268e-12	-0.446871	0.216	0.279	9.63476e-09
Anks4b	1.23982e-12	-0.386679	0.365	0.424	9.85038e-09
Sec61a1	1.25911e-12	-0.381693	0.22	0.286	1.00036e-08
Cop1	1.28851e-12	-0.239323	0.611	0.653	1.02372e-08
Ak4	1.34992e-12	-0.422227	0.225	0.289	1.07251e-08
Usp15	1.41586e-12	-0.242302	0.568	0.629	1.1249e-08
Ppm1g	1.42457e-12	-0.596526	0.111	0.163	1.13182e-08
Mctp2	1.42573e-12	-0.225803	0.547	0.609	1.13274e-08
1300017J02Rik	1.44421e-12	0.295425	0.477	0.411	1.14743e-08
Hpn	1.45056e-12	-0.217079	0.638	0.695	1.15247e-08
Aopep	1.49512e-12	-0.254942	0.737	0.769	1.18787e-08
Pcbd2	1.51514e-12	0.532764	0.232	0.176	1.20378e-08
Tbc1d17	1.52758e-12	-0.840413	0.07	0.112	1.21366e-08
Mocs1	1.54833e-12	-0.410189	0.333	0.395	1.23015e-08
Tfdp1	1.57678e-12	-0.584195	0.148	0.203	1.25275e-08
Ndufa10	1.61127e-12	-0.573262	0.138	0.191	1.28015e-08
Abcf3	1.62807e-12	-0.554746	0.113	0.165	1.2935e-08
Selenok	1.64805e-12	0.560046	0.225	0.167	1.30938e-08
Akap8l	1.67498e-12	-0.302165	0.525	0.583	1.33078e-08
Stau2	1.70481e-12	-0.362512	0.369	0.431	1.35447e-08
Tmem63b	1.75384e-12	-0.531073	0.191	0.249	1.39343e-08
Fbrsl1	1.7735e-12	-0.448996	0.275	0.333	1.40905e-08
Parp14	1.77877e-12	-0.729597	0.078	0.122	1.41324e-08
Ube2j2	1.84125e-12	-0.390612	0.192	0.255	1.46288e-08
Apba3	1.97489e-12	-0.605632	0.11	0.16	1.56905e-08
6530409C15Rik	2.01757e-12	0.516933	0.209	0.153	1.60296e-08
Sec31a	2.07776e-12	-0.245284	0.631	0.675	1.65078e-08
Napa	2.12206e-12	-0.513999	0.143	0.198	1.68597e-08
4931406P16Rik	2.1665e-12	-0.376236	0.325	0.39	1.72129e-08
Hnrnph1	2.19862e-12	-0.266742	0.581	0.625	1.74681e-08
Gm32250	2.2017e-12	0.766774	0.113	0.07	1.74925e-08
Ttc7b	2.24015e-12	-0.263649	0.471	0.536	1.7798e-08
Ubn2	2.44947e-12	-0.203491	0.724	0.77	1.94611e-08
Rbm10	2.52529e-12	-0.411825	0.241	0.306	2.00634e-08
Sqstm1	2.61477e-12	0.375885	0.456	0.391	2.07743e-08
Sec23ip	2.71217e-12	-0.485929	0.191	0.25	2.15482e-08
Copz1	2.83864e-12	-0.443198	0.244	0.306	2.2553e-08
Luc7l3	2.92851e-12	-0.276703	0.532	0.594	2.3267e-08
Wars2	3.00449e-12	-0.444836	0.185	0.245	2.38707e-08
Tut4	3.01955e-12	0.33138	0.418	0.354	2.39903e-08
Adam12	3.04472e-12	0.808893	0.076	0.041	2.41903e-08
Pon3	3.05158e-12	0.383857	0.297	0.231	2.42448e-08
Tspan14	3.06404e-12	0.508122	0.186	0.132	2.43438e-08
Samd8	3.14948e-12	0.460317	0.231	0.173	2.50226e-08
Cpsf2	3.16915e-12	-0.621748	0.082	0.127	2.51789e-08
Gm19710	3.18477e-12	0.491225	0.238	0.18	2.5303e-08
Gm9968	3.31023e-12	-0.312137	0.323	0.391	2.62998e-08
Arf4	3.31534e-12	-0.310703	0.401	0.463	2.63404e-08
Gpr155	3.38058e-12	1.01266	0.071	0.038	2.68587e-08
Gm20732	3.44953e-12	-0.323496	0.351	0.416	2.74065e-08
Cpn1	3.5932e-12	-0.235499	0.553	0.607	2.85479e-08
Psmd1	3.61112e-12	-0.262507	0.505	0.564	2.86904e-08
Nr0b2	3.61959e-12	-0.505963	0.376	0.431	2.87577e-08
Ncoa6	3.92322e-12	-0.293133	0.459	0.521	3.117e-08
Sympk	3.94268e-12	-0.520642	0.154	0.209	3.13246e-08
Arhgap18	4.03519e-12	0.445266	0.25	0.19	3.20596e-08
Lsr	4.13737e-12	-0.405466	0.313	0.377	3.28714e-08
Gm17106	4.16688e-12	0.491932	0.237	0.179	3.31059e-08
Dcn	4.26126e-12	1.18777	0.058	0.028	3.38557e-08
Bag6	4.35821e-12	-0.628456	0.08	0.124	3.4626e-08
Atp2a2	4.41922e-12	0.185106	0.854	0.823	3.51107e-08
Mfsd4a	4.53295e-12	0.515459	0.218	0.163	3.60143e-08
Gm19950	4.56383e-12	0.482992	0.217	0.16	3.62597e-08
Rora	4.69067e-12	0.171888	0.802	0.77	3.72674e-08
Cep152	4.71982e-12	0.71268	0.106	0.065	3.7499e-08
Arfgap1	4.81047e-12	-0.555113	0.165	0.221	3.82192e-08
Rbm25	5.02158e-12	-0.177119	0.826	0.846	3.98965e-08
Rnf24	5.16667e-12	-0.64964	0.107	0.156	4.10492e-08
Rps6kb2	5.28048e-12	-0.630308	0.106	0.155	4.19534e-08
Rnf141	5.40835e-12	0.553589	0.203	0.148	4.29694e-08
Rb1cc1	5.43213e-12	-0.23487	0.611	0.657	4.31582e-08
Tef	5.53773e-12	0.338482	0.376	0.307	4.39973e-08
Zfp263	5.58619e-12	-0.632437	0.102	0.15	4.43823e-08
Gigyf1	5.81945e-12	-0.590319	0.15	0.204	4.62355e-08
Pnkd	6.03591e-12	0.491526	0.221	0.164	4.79553e-08
Pikfyve	6.17165e-12	-0.269037	0.494	0.548	4.90338e-08
B3galt1	6.2485e-12	-0.377332	0.828	0.711	4.96444e-08
Cnst	6.42233e-12	0.45456	0.212	0.155	5.10254e-08
Rmdn1	6.45155e-12	0.244566	0.592	0.533	5.12576e-08
Chd2	6.86906e-12	-0.200782	0.729	0.783	5.45747e-08
Fbxl2	6.93359e-12	0.668069	0.13	0.085	5.50874e-08
Slc38a3	7.00134e-12	0.174474	0.845	0.792	5.56257e-08
Ctbs	7.28083e-12	0.693226	0.092	0.054	5.78462e-08
Apoc2	7.64735e-12	-0.291747	0.347	0.417	6.07582e-08
Homer1	7.66561e-12	-0.342722	0.271	0.333	6.09033e-08
Tfrc	7.73354e-12	0.515378	0.209	0.153	6.1443e-08
Gm49336	7.77737e-12	-0.476902	0.153	0.208	6.17912e-08
Sucla2	7.77861e-12	-0.347	0.324	0.386	6.1801e-08
Gck	8.2071e-12	-0.21384	0.636	0.69	6.52054e-08
Acox2	8.3344e-12	0.214617	0.647	0.589	6.62168e-08
St3gal1	8.34811e-12	-0.286235	0.437	0.5	6.63257e-08
Scpep1	8.78168e-12	0.730838	0.11	0.069	6.97705e-08
Pank1	9.36454e-12	0.147816	0.883	0.846	7.44012e-08
Ptcd3	9.62275e-12	-0.335987	0.255	0.317	7.64527e-08
Sumf1	9.87309e-12	-0.544465	0.143	0.195	7.84417e-08
Ubtf	9.88017e-12	-0.59009	0.142	0.193	7.8498e-08
Zfp444	9.99739e-12	0.368435	0.235	0.176	7.94293e-08
Smarca4	1.06653e-11	-0.377254	0.304	0.365	8.47362e-08
Alpk1	1.11859e-11	-1.55113	0.012	0.033	8.88716e-08
Ankib1	1.14465e-11	-0.325061	0.323	0.39	9.09426e-08
Cox6c	1.14916e-11	0.489189	0.229	0.173	9.13011e-08
Adra1b	1.15656e-11	0.191085	0.713	0.668	9.18891e-08
Tmem265	1.17472e-11	-0.606005	0.096	0.142	9.33315e-08
Psmd4	1.1911e-11	-0.356145	0.305	0.367	9.46327e-08
Mob1b	1.19688e-11	-0.322502	0.35	0.414	9.50917e-08
Gon4l	1.20378e-11	-0.341893	0.31	0.375	9.56406e-08
Gm26759	1.27795e-11	0.504662	0.17	0.12	1.01533e-07
Gm36251	1.29272e-11	0.364756	0.291	0.229	1.02706e-07
Pabpc4	1.29296e-11	-0.559696	0.141	0.193	1.02726e-07
Sil1	1.29772e-11	0.214239	0.663	0.615	1.03104e-07
Gle1	1.35377e-11	0.508668	0.245	0.188	1.07557e-07
Slco2b1	1.3583e-11	0.344356	0.379	0.313	1.07917e-07
Nucb1	1.35911e-11	0.591961	0.154	0.107	1.07981e-07
Cdk11b	1.36057e-11	-0.368972	0.243	0.304	1.08098e-07
Ccdc58	1.39874e-11	0.285043	0.525	0.463	1.1113e-07
Eef2	1.47285e-11	-0.455056	0.261	0.319	1.17018e-07
Gm10135	1.49246e-11	0.572029	0.169	0.119	1.18576e-07
Rps27a	1.51902e-11	0.482822	0.255	0.197	1.20686e-07
Rpl35a	1.51923e-11	0.483909	0.209	0.155	1.20703e-07
2210408I21Rik	1.53798e-11	-0.373348	0.309	0.372	1.22192e-07
Bag3	1.57152e-11	-0.414457	0.184	0.243	1.24858e-07
Hebp1	1.60532e-11	0.30073	0.427	0.37	1.27543e-07
Gm42917	1.64725e-11	0.751017	0.098	0.059	1.30874e-07
Ebp	1.66007e-11	0.613456	0.185	0.134	1.31892e-07
Ppp2r3d	1.70446e-11	-0.878408	0.058	0.095	1.3542e-07
Parg	1.72542e-11	-0.337668	0.338	0.399	1.37084e-07
2810013P06Rik	1.75607e-11	0.543424	0.189	0.137	1.3952e-07
Copg1	1.86032e-11	-0.598352	0.108	0.155	1.47802e-07
Cox8a	1.87311e-11	0.564701	0.205	0.153	1.48818e-07
Uqcrb	1.87487e-11	0.735668	0.138	0.094	1.48959e-07
Gcdh	1.87549e-11	0.319324	0.321	0.255	1.49008e-07
Hadh	1.88893e-11	0.419376	0.266	0.207	1.50075e-07
mt-Co2	1.90455e-11	0.531486	0.305	0.25	1.51317e-07
Myef2	1.93005e-11	-0.434761	0.213	0.272	1.53342e-07
Noc2l	1.93783e-11	-0.785476	0.095	0.139	1.53961e-07
Slc3a1	1.96904e-11	-0.405005	0.246	0.308	1.5644e-07
P4ha1	1.97083e-11	-0.342354	0.286	0.348	1.56582e-07
Hpcal1	2.05556e-11	0.67254	0.116	0.074	1.63314e-07
Gtpbp2	2.07005e-11	-0.380329	0.263	0.323	1.64465e-07
Arcn1	2.07764e-11	-0.318212	0.331	0.396	1.65069e-07
Lnpep	2.11676e-11	0.260986	0.516	0.451	1.68176e-07
G0s2	2.12595e-11	-0.451631	0.409	0.458	1.68907e-07
Naa16	2.14451e-11	-0.288454	0.448	0.508	1.70381e-07
Fgd6	2.15159e-11	-0.193228	0.74	0.774	1.70944e-07
Scaf4	2.19212e-11	-0.279752	0.461	0.523	1.74164e-07
Gmip	2.19865e-11	-0.920874	0.035	0.066	1.74683e-07
Plscr1	2.2213e-11	0.74199	0.098	0.06	1.76483e-07
Serpina1c	2.22998e-11	0.252044	0.834	0.788	1.77172e-07
P2ry14	2.31159e-11	1.29951	0.041	0.017	1.83656e-07
Enpep	2.31914e-11	0.553517	0.205	0.153	1.84256e-07
Srcap	2.43709e-11	-0.278396	0.495	0.554	1.93626e-07
Stk25	2.58606e-11	-0.529742	0.149	0.201	2.05463e-07
Trafd1	2.59407e-11	0.321836	0.278	0.215	2.06099e-07
Gm42031	2.59908e-11	-0.540068	0.217	0.27	2.06497e-07
Suco	2.60288e-11	0.481059	0.253	0.196	2.06799e-07
Nek1	2.62584e-11	-0.306721	0.456	0.51	2.08623e-07
Lin52	2.6723e-11	-0.235873	0.566	0.615	2.12314e-07
Numb	2.67472e-11	-0.171827	0.787	0.812	2.12506e-07
Tmem59	2.73155e-11	0.472178	0.257	0.201	2.17022e-07
Izumo4	2.90434e-11	0.649453	0.11	0.07	2.3075e-07
Hnf1b	2.92658e-11	0.512553	0.183	0.132	2.32517e-07
Dera	2.94126e-11	0.441219	0.225	0.168	2.33683e-07
Gm15283	2.95598e-11	0.39994	0.273	0.213	2.34853e-07
Pde4a	3.01284e-11	-0.803614	0.036	0.067	2.39371e-07
Dusp6	3.02173e-11	0.591131	0.15	0.103	2.40076e-07
Rapgef5	3.03443e-11	1.15118	0.054	0.026	2.41086e-07
Pde7b	3.0722e-11	0.353762	0.4	0.341	2.44087e-07
Mcee	3.13287e-11	0.783121	0.11	0.071	2.48906e-07
Nde1	3.18472e-11	0.800324	0.101	0.063	2.53026e-07
2010315B03Rik	3.20819e-11	0.42164	0.211	0.157	2.54891e-07
Ythdf3	3.23403e-11	-0.196346	0.661	0.704	2.56944e-07
Plekhj1	3.2495e-11	-0.674098	0.091	0.135	2.58172e-07
Phf20	3.29108e-11	-0.423793	0.221	0.28	2.61477e-07
Adamts6	3.29619e-11	0.528293	0.296	0.241	2.61882e-07
Fbxw11	3.30749e-11	-0.32524	0.373	0.434	2.6278e-07
Ccny	3.39567e-11	-0.241979	0.574	0.617	2.69786e-07
Magi1	3.40971e-11	0.113778	0.951	0.954	2.70902e-07
Fnip1	3.50146e-11	0.197172	0.627	0.566	2.78191e-07
Pa2g4	3.58683e-11	-0.668952	0.091	0.134	2.84974e-07
Zbtb40	3.63083e-11	-0.501862	0.173	0.226	2.88469e-07
Aak1	3.67237e-11	-0.298162	0.433	0.494	2.9177e-07
Grpel2	3.78032e-11	0.41351	0.262	0.205	3.00346e-07
Ndufa13	3.85012e-11	0.593138	0.198	0.147	3.05892e-07
4921511C10Rik	3.99686e-11	0.462413	0.184	0.133	3.17551e-07
Ptk2	4.02058e-11	-0.28415	0.533	0.582	3.19435e-07
Acot13	4.09175e-11	0.641183	0.137	0.093	3.25089e-07
Igf2r	4.20639e-11	0.497542	0.206	0.154	3.34198e-07
Mdh1	4.23762e-11	0.338981	0.403	0.339	3.36679e-07
Lmo7	4.24606e-11	0.382317	0.326	0.268	3.37349e-07
Zfp697	4.24863e-11	0.308886	0.451	0.386	3.37554e-07
Rhot2	4.25035e-11	-0.717153	0.075	0.116	3.3769e-07
Rtp4	4.4893e-11	0.484896	0.194	0.143	3.56675e-07
Ranbp9	4.5095e-11	-0.225989	0.626	0.67	3.5828e-07
Parp10	4.63049e-11	-0.762844	0.056	0.092	3.67892e-07
Fam126b	4.63232e-11	-0.324466	0.397	0.456	3.68038e-07
Cyp2d22	4.67112e-11	0.27529	0.523	0.47	3.71121e-07
Snd1	4.731e-11	-0.146851	0.857	0.876	3.75878e-07
Sec23b	4.7424e-11	-0.442418	0.225	0.281	3.76783e-07
Zfyve21	4.80935e-11	0.662797	0.12	0.078	3.82103e-07
Irf2	4.85417e-11	-0.165481	0.859	0.884	3.85664e-07
Tbccd1	4.90857e-11	0.408637	0.233	0.176	3.89986e-07
Prdm2	5.15275e-11	-0.218522	0.62	0.669	4.09386e-07
Arid4b	5.45501e-11	-0.192915	0.746	0.782	4.33401e-07
Cmtm8	5.51143e-11	0.222367	0.607	0.548	4.37883e-07
Malt1	5.68272e-11	0.439077	0.211	0.157	4.51492e-07
mt-Nd2	5.84205e-11	0.525393	0.225	0.172	4.64151e-07
Gsdme	5.92655e-11	0.399409	0.321	0.261	4.70865e-07
Epas1	5.93066e-11	0.208549	0.64	0.581	4.71191e-07
Agpat3	5.98483e-11	0.245728	0.513	0.449	4.75495e-07
Mrpl24	6.13534e-11	-0.545204	0.121	0.17	4.87453e-07
Rnf121	6.29669e-11	-0.488153	0.16	0.212	5.00272e-07
Unc93b1	6.47268e-11	-0.570693	0.094	0.138	5.14254e-07
2610507B11Rik	6.50486e-11	-0.425623	0.237	0.296	5.16811e-07
Iws1	6.6654e-11	-0.257704	0.498	0.553	5.29566e-07
Tmem51	6.67287e-11	0.968605	0.071	0.04	5.3016e-07
Slc25a20	6.71714e-11	-0.302132	0.378	0.439	5.33677e-07
Csnk2a2	6.71988e-11	-0.431163	0.216	0.272	5.33895e-07
Shfl	6.83172e-11	-0.265336	0.544	0.597	5.4278e-07
Echdc2	6.95366e-11	-0.151405	0.859	0.879	5.52468e-07
Mia2	7.06861e-11	0.116523	0.951	0.936	5.61601e-07
Ppip5k2	7.36148e-11	-0.251862	0.597	0.642	5.8487e-07
Gm17108	7.43438e-11	0.583322	0.156	0.11	5.90662e-07
Tbc1d24	7.51199e-11	-0.432981	0.181	0.237	5.96827e-07
Sbf1	7.6334e-11	-0.662891	0.098	0.142	6.06473e-07
Ppp1r12c	7.70162e-11	-0.78118	0.075	0.115	6.11894e-07
Selenoo	7.86484e-11	0.393865	0.267	0.209	6.24861e-07
Cda	7.89663e-11	0.540242	0.163	0.116	6.27388e-07
Clk1	8.13133e-11	0.2079	0.659	0.606	6.46034e-07
Apoa5	8.22817e-11	-0.229949	0.837	0.849	6.53728e-07
Rtp3	8.52838e-11	-0.374628	0.265	0.325	6.7758e-07
Pacs2	8.65707e-11	0.599848	0.138	0.093	6.87804e-07
Mpp7	8.70948e-11	-0.37569	0.306	0.365	6.91968e-07
Wdr12	8.7395e-11	-0.497843	0.142	0.193	6.94353e-07
Iars	8.82832e-11	-0.528985	0.16	0.211	7.0141e-07
Sltm	9.00846e-11	-0.249391	0.531	0.583	7.15722e-07
Sub1	9.43948e-11	0.578519	0.134	0.091	7.49967e-07
Gm27017	9.68781e-11	0.79676	0.09	0.055	7.69697e-07
Nt5e	9.71717e-11	1.44484	0.036	0.014	7.72029e-07
Wdr77	9.84445e-11	-0.694806	0.079	0.119	7.82141e-07
Tmem161b	9.92216e-11	-0.309855	0.318	0.381	7.88316e-07
Prpf19	9.94668e-11	-0.545571	0.112	0.158	7.90264e-07
Stard13	9.96794e-11	0.141793	0.841	0.82	7.91953e-07
Zfp292	9.98367e-11	0.238095	0.533	0.472	7.93202e-07
St3gal3	1.03821e-10	-0.170426	0.852	0.873	8.24859e-07
Sars	1.06116e-10	-0.447746	0.142	0.193	8.43095e-07
Letm1	1.13467e-10	-0.662495	0.083	0.124	9.01496e-07
Timm9	1.1356e-10	-0.321657	0.299	0.362	9.02235e-07
Cnpy3	1.14736e-10	0.533225	0.17	0.122	9.11578e-07
Gak	1.15105e-10	-0.322932	0.318	0.378	9.14513e-07
Shroom2	1.174e-10	0.197824	0.5	0.431	9.32745e-07
Naa15	1.17567e-10	-0.291162	0.391	0.453	9.34072e-07
Clasp1	1.18527e-10	-0.321587	0.378	0.436	9.41697e-07
mt-Atp6	1.21218e-10	0.464269	0.397	0.337	9.63075e-07
Slc10a7	1.22335e-10	-0.283194	0.434	0.491	9.71951e-07
Pnpla7	1.22634e-10	0.268368	0.521	0.465	9.74326e-07
3110082I17Rik	1.22959e-10	0.5518	0.196	0.146	9.76909e-07
Mbd5	1.23605e-10	-0.16796	0.845	0.866	9.82039e-07
Nudt12	1.26332e-10	0.370844	0.322	0.262	1.00371e-06
Nnmt	1.26421e-10	0.481611	0.458	0.414	1.00441e-06
Rpl27a	1.30858e-10	0.38772	0.309	0.25	1.03967e-06
Stxbp4	1.33743e-10	-0.507705	0.132	0.181	1.06259e-06
Taf4b	1.35609e-10	-0.502216	0.102	0.147	1.07742e-06
Fam222b	1.37413e-10	-0.22843	0.503	0.567	1.09174e-06
Dpy19l4	1.37982e-10	0.426427	0.204	0.15	1.09627e-06
Ago2	1.42457e-10	-0.45529	0.163	0.215	1.13182e-06
Sun1	1.45072e-10	0.716476	0.106	0.068	1.1526e-06
Tom1l2	1.4728e-10	-0.235653	0.59	0.639	1.17014e-06
Rassf4	1.48721e-10	1.14356	0.056	0.028	1.18159e-06
Cyb5b	1.5364e-10	-0.212543	0.606	0.664	1.22067e-06
Mbnl2	1.54385e-10	0.130279	0.663	0.589	1.22659e-06
Zfp384	1.57198e-10	-0.437189	0.222	0.278	1.24894e-06
P4hb	1.57482e-10	-0.305609	0.397	0.454	1.25119e-06
Hsp90aa1	1.62641e-10	-0.51375	0.115	0.162	1.29218e-06
Fads1	1.64283e-10	-0.446391	0.251	0.31	1.30523e-06
Slc18b1	1.68139e-10	0.673888	0.084	0.05	1.33587e-06
Zfp609	1.69809e-10	-0.272018	0.411	0.469	1.34913e-06
Mafg	1.72299e-10	0.270578	0.482	0.422	1.36892e-06
Tardbp	1.73158e-10	-0.26419	0.467	0.526	1.37574e-06
Golga4	1.76466e-10	-0.223157	0.542	0.594	1.40203e-06
Cs	1.80561e-10	-0.309093	0.336	0.397	1.43456e-06
Mettl7a1	1.8124e-10	0.491224	0.235	0.182	1.43995e-06
Tcea1	1.82376e-10	-0.232671	0.379	0.442	1.44898e-06
Gm15883	1.83314e-10	0.261108	0.515	0.466	1.45643e-06
Mgrn1	1.8685e-10	0.307541	0.418	0.357	1.48452e-06
Msh2	1.89909e-10	1.12949	0.054	0.027	1.50882e-06
Cep170	1.92412e-10	-0.344615	0.27	0.328	1.52872e-06
Pum2	2.01963e-10	-0.202723	0.634	0.681	1.60459e-06
Slc39a14	2.04793e-10	0.144205	0.908	0.895	1.62708e-06
Cdk8	2.08708e-10	-0.227013	0.614	0.667	1.65818e-06
Atg3	2.16676e-10	0.281286	0.467	0.406	1.72149e-06
Tm9sf4	2.18213e-10	-0.338746	0.213	0.27	1.7337e-06
Zdhhc14	2.19654e-10	-0.371453	0.255	0.312	1.74515e-06
Invs	2.2308e-10	0.349241	0.283	0.226	1.77237e-06
Simc1	2.24215e-10	-0.317189	0.371	0.429	1.78139e-06
Tcf7l2	2.25339e-10	-0.182647	0.795	0.827	1.79032e-06
Itga1	2.28328e-10	0.3833	0.343	0.284	1.81407e-06
G3bp1	2.32833e-10	-0.400241	0.241	0.296	1.84986e-06
Pdlim1	2.33781e-10	0.578197	0.138	0.095	1.85739e-06
Map3k7	2.35966e-10	-0.332577	0.286	0.345	1.87475e-06
Vps26c	2.44889e-10	0.627286	0.095	0.059	1.94564e-06
Myo5b	2.45221e-10	-0.325711	0.425	0.48	1.94828e-06
E130308A19Rik	2.45592e-10	-0.383776	0.23	0.287	1.95123e-06
Fyttd1	2.45726e-10	-0.354708	0.28	0.339	1.95229e-06
Zhx3	2.49452e-10	-0.158634	0.765	0.817	1.9819e-06
Pyroxd2	2.51034e-10	-0.533129	0.124	0.171	1.99447e-06
Nr3c2	2.62968e-10	-0.293888	0.664	0.693	2.08928e-06
Arl5a	2.69871e-10	-0.340233	0.291	0.352	2.14413e-06
Trmt61b	2.73844e-10	-0.402967	0.158	0.21	2.17569e-06
4930484I04Rik	2.79966e-10	0.651805	0.133	0.092	2.22433e-06
Pfkfb2	3.04723e-10	-0.252654	0.463	0.522	2.42103e-06
Cobll1	3.21367e-10	0.0914087	0.781	0.718	2.55326e-06
Lrrc45	3.3585e-10	-0.900632	0.044	0.076	2.66833e-06
Gm48765	3.3738e-10	0.459461	0.218	0.166	2.68049e-06
Eml4	3.42556e-10	-0.310363	0.42	0.473	2.72161e-06
2210408F21Rik	3.7298e-10	0.190348	0.643	0.591	2.96333e-06
E2f4	3.81514e-10	-0.67074	0.081	0.12	3.03113e-06
Stk11	3.82424e-10	-0.417557	0.218	0.272	3.03836e-06
Tmem183a	3.8266e-10	0.319704	0.334	0.273	3.04023e-06
Gm16023	3.86413e-10	0.478898	0.164	0.118	3.07005e-06
Gpam	3.94473e-10	0.19295	0.825	0.8	3.13409e-06
Slc22a23	3.9461e-10	0.111199	0.707	0.654	3.13518e-06
Slc25a27	4.10576e-10	0.747149	0.078	0.046	3.26203e-06
Tra2b	4.1382e-10	-0.26329	0.522	0.575	3.2878e-06
Mipep	4.16367e-10	0.53194	0.129	0.088	3.30804e-06
Fbrs	4.21644e-10	-0.36879	0.141	0.191	3.34997e-06
Trim7	4.24182e-10	0.445832	0.185	0.137	3.37013e-06
Akap1	4.25983e-10	-0.271514	0.49	0.541	3.38443e-06
Ddx55	4.34447e-10	-0.543274	0.105	0.148	3.45168e-06
Utp14a	4.42034e-10	-0.296932	0.23	0.288	3.51196e-06
Tprkb	4.52105e-10	0.291432	0.401	0.341	3.59198e-06
Fam234b	4.5751e-10	0.678527	0.118	0.079	3.63492e-06
Mif	4.63901e-10	0.694512	0.093	0.058	3.68569e-06
Rbm5	5.0871e-10	-0.211595	0.555	0.608	4.0417e-06
Lman2	5.11815e-10	-0.364509	0.256	0.313	4.06637e-06
Ewsr1	5.17165e-10	-0.225778	0.537	0.582	4.10887e-06
Cask	5.33905e-10	-0.365916	0.356	0.409	4.24187e-06
Camk2b	5.3786e-10	0.190756	0.776	0.732	4.2733e-06
Gm30054	5.39551e-10	0.922336	0.075	0.044	4.28673e-06
Thrap3	5.45329e-10	-0.219106	0.532	0.587	4.33264e-06
Rnf20	5.55657e-10	-0.455658	0.201	0.252	4.41469e-06
Gm38604	5.62968e-10	0.727701	0.09	0.056	4.47278e-06
Gng5	5.73927e-10	0.679093	0.126	0.086	4.55985e-06
Mtx3	5.78687e-10	0.490528	0.153	0.109	4.59767e-06
Memo1	5.82636e-10	-0.237686	0.375	0.435	4.62904e-06
Rps5	5.82696e-10	0.617335	0.109	0.072	4.62952e-06
Rab5c	5.9272e-10	-0.600473	0.081	0.12	4.70916e-06
Psme4	6.04405e-10	-0.188093	0.709	0.752	4.802e-06
Ifitm2	6.06023e-10	0.650053	0.099	0.063	4.81485e-06
Micall1	6.07146e-10	-0.582479	0.095	0.136	4.82378e-06
Slc25a5	6.16778e-10	0.578555	0.153	0.11	4.9003e-06
Arap2	6.2619e-10	0.318663	0.29	0.23	4.97508e-06
Gm31522	6.36794e-10	0.494413	0.194	0.146	5.05933e-06
Plin3	6.54982e-10	0.560103	0.11	0.072	5.20383e-06
Spaca6	6.60921e-10	-0.636096	0.074	0.112	5.25101e-06
Per1	7.04387e-10	0.426075	0.193	0.144	5.59636e-06
Nadk2	7.04855e-10	0.304783	0.44	0.384	5.60007e-06
Urgcp	7.25016e-10	-0.300183	0.315	0.373	5.76025e-06
Gm16158	7.3013e-10	0.530746	0.171	0.125	5.80088e-06
Asph	7.30533e-10	0.310556	0.422	0.365	5.80408e-06
Ahcyl1	7.38145e-10	-0.273856	0.446	0.499	5.86456e-06
Chd1l	7.38322e-10	0.568452	0.129	0.089	5.86597e-06
Ifih1	7.43046e-10	-0.548052	0.13	0.176	5.9035e-06
Hdc	7.50992e-10	-0.595195	0.09	0.13	5.96663e-06
Pdk2	7.58851e-10	0.51356	0.159	0.115	6.02907e-06
Morc2a	7.6238e-10	-0.349933	0.275	0.33	6.05711e-06
Uqcrfs1	7.73628e-10	0.704543	0.111	0.074	6.14648e-06
Sdha	7.87453e-10	-0.308771	0.391	0.448	6.25632e-06
Ppp1r13b	7.94371e-10	-0.386828	0.256	0.312	6.31128e-06
Cyp2j5	8.12191e-10	-0.166562	0.888	0.904	6.45286e-06
Nubpl	8.16729e-10	0.367205	0.165	0.118	6.48891e-06
Morc3	8.23866e-10	-0.335473	0.261	0.317	6.54561e-06
Clec4f	8.25273e-10	-0.958898	0.021	0.043	6.5568e-06
Uroc1	8.49461e-10	-0.219183	0.623	0.67	6.74897e-06
Palld	8.54937e-10	-0.272398	0.578	0.621	6.79247e-06
Snx5	8.55097e-10	-0.458644	0.16	0.209	6.79375e-06
2810459M11Rik	8.67838e-10	-0.475572	0.211	0.261	6.89497e-06
Uox	8.73447e-10	-0.14144	0.968	0.951	6.93954e-06
Hsp90b1	8.85936e-10	0.169615	0.84	0.806	7.03876e-06
Xpo1	9.13127e-10	0.32543	0.255	0.2	7.2548e-06
Ppp2r1b	9.26746e-10	0.534035	0.125	0.085	7.363e-06
mt-Nd1	9.30425e-10	0.458514	0.218	0.168	7.39223e-06
Jak1	9.54893e-10	-0.253079	0.59	0.636	7.58662e-06
Plpbp	9.55487e-10	0.350791	0.251	0.196	7.59135e-06
Gm26632	9.62674e-10	0.300717	0.342	0.282	7.64845e-06
Gnb2	9.63055e-10	-0.566784	0.107	0.15	7.65147e-06
Unc13b	9.9857e-10	0.411828	0.178	0.13	7.93364e-06
Rnf103	1.01941e-09	0.272889	0.482	0.426	8.09919e-06
Clpb	1.0236e-09	-0.481906	0.161	0.209	8.13249e-06
Ap3b1	1.03498e-09	0.190504	0.706	0.672	8.22295e-06
Oga	1.05512e-09	-0.256022	0.478	0.532	8.3829e-06
Wdr66	1.08423e-09	-1.73072	0.008	0.024	8.61422e-06
Spg7	1.10531e-09	-0.423796	0.136	0.183	8.78169e-06
mt-Cytb	1.10986e-09	0.532881	0.298	0.244	8.81782e-06
Cfb	1.13018e-09	-0.347547	0.223	0.28	8.97926e-06
Abcd4	1.1506e-09	0.533768	0.129	0.088	9.14155e-06
Rbm28	1.15582e-09	-0.362488	0.264	0.317	9.183e-06
Cyp3a13	1.15949e-09	0.494148	0.473	0.428	9.21215e-06
Sec24b	1.17305e-09	-0.354455	0.267	0.32	9.31989e-06
Acin1	1.1789e-09	-0.248599	0.447	0.503	9.3664e-06
Sf3b3	1.21817e-09	-0.321276	0.252	0.31	9.67837e-06
Capza1	1.22356e-09	-0.2804	0.282	0.34	9.72114e-06
Rel	1.23542e-09	0.592765	0.152	0.11	9.81538e-06
Acyp2	1.25215e-09	-0.505368	0.145	0.19	9.94833e-06
Aftph	1.27192e-09	-0.267181	0.398	0.457	1.01054e-05
Pcbd1	1.27317e-09	0.503963	0.195	0.148	1.01153e-05
Mtf2	1.29132e-09	-0.317548	0.211	0.265	1.02596e-05
Nup155	1.3002e-09	-0.358378	0.221	0.273	1.03301e-05
Aox3	1.30212e-09	-0.531207	0.91	0.899	1.03453e-05
Fam160b2	1.34334e-09	-0.764549	0.068	0.104	1.06728e-05
Fau	1.38372e-09	0.451907	0.267	0.214	1.09937e-05
Mob3c	1.38601e-09	-0.705313	0.076	0.112	1.10118e-05
Ap3m1	1.43665e-09	-0.198838	0.653	0.701	1.14141e-05
Klf6	1.43768e-09	1.35299	0.031	0.012	1.14224e-05
Vcp	1.4758e-09	-0.272333	0.389	0.445	1.17253e-05
Mttp	1.47704e-09	-0.20225	0.662	0.71	1.17351e-05
Agpat2	1.48173e-09	-0.441041	0.145	0.192	1.17724e-05
Snx13	1.49784e-09	-0.197996	0.578	0.618	1.19004e-05
Fastk	1.49972e-09	-0.527427	0.109	0.151	1.19153e-05
Il1r1	1.5075e-09	-0.216081	0.726	0.781	1.19771e-05
Rnd3	1.51563e-09	-0.431832	0.181	0.231	1.20417e-05
Adtrp	1.53211e-09	-0.239975	0.596	0.64	1.21726e-05
Ranbp3	1.59096e-09	-0.524236	0.131	0.176	1.26402e-05
Gnptab	1.59847e-09	0.689534	0.078	0.047	1.26998e-05
Ndufb9	1.6376e-09	0.539069	0.138	0.097	1.30107e-05
Slc35g1	1.66621e-09	-0.345626	0.246	0.305	1.3238e-05
Mapkap1	1.70438e-09	-0.219607	0.614	0.67	1.35413e-05
Adar	1.7207e-09	-0.642797	0.097	0.137	1.36709e-05
BC024386	1.72897e-09	0.135679	0.855	0.825	1.37367e-05
Wdr37	1.74755e-09	-0.370342	0.282	0.336	1.38843e-05
B230217O12Rik	1.83207e-09	0.534646	0.152	0.11	1.45558e-05
Plxnb2	1.85132e-09	-0.47786	0.163	0.212	1.47088e-05
Rab7	1.86614e-09	-0.310359	0.347	0.403	1.48265e-05
Abl2	1.88248e-09	-0.339607	0.312	0.365	1.49563e-05
Cep250	1.89752e-09	0.526825	0.11	0.073	1.50758e-05
Mark3	1.92012e-09	-0.251342	0.459	0.515	1.52554e-05
Gm13775	1.94541e-09	0.428016	0.286	0.237	1.54563e-05
Lrrfip2	1.99285e-09	-0.224179	0.604	0.643	1.58332e-05
Pex19	2.00929e-09	0.399097	0.277	0.225	1.59638e-05
Gm15638	2.04093e-09	-0.443658	0.225	0.275	1.62152e-05
Cyp4f15	2.05237e-09	0.235387	0.614	0.567	1.63061e-05
Scai	2.22871e-09	0.412367	0.2	0.151	1.77071e-05
Uhrf2	2.25642e-09	-0.254149	0.43	0.486	1.79273e-05
Sap25	2.27676e-09	-0.930156	0.029	0.054	1.80889e-05
Runx2	2.3014e-09	0.637438	0.105	0.069	1.82846e-05
Rsf1os1	2.31874e-09	0.408674	0.276	0.225	1.84224e-05
Fam192a	2.32111e-09	-0.486728	0.152	0.199	1.84412e-05
Soat2	2.34708e-09	0.368707	0.268	0.214	1.86475e-05
Zswim6	2.34755e-09	-0.284651	0.221	0.275	1.86513e-05
Hjurp	2.39738e-09	0.22553	0.563	0.516	1.90472e-05
Dcun1d5	2.40056e-09	-0.417295	0.201	0.251	1.90725e-05
Gcnt7	2.40833e-09	0.381497	0.29	0.235	1.91341e-05
Cyp4a12a	2.52797e-09	-0.275597	0.278	0.338	2.00847e-05
Bckdhb	2.54411e-09	-0.259006	0.725	0.758	2.0213e-05
Stk40	2.57375e-09	-0.365011	0.26	0.313	2.04484e-05
Lrch1	2.67496e-09	0.271008	0.392	0.337	2.12526e-05
Klhl5	2.72021e-09	0.474172	0.164	0.12	2.16121e-05
Gm28375	2.77129e-09	0.492555	0.18	0.135	2.20179e-05
Ppia	2.89922e-09	0.470037	0.231	0.183	2.30343e-05
Pgm1	2.96487e-09	0.237601	0.453	0.391	2.35559e-05
Rab4a	2.98491e-09	0.410277	0.205	0.158	2.37151e-05
Sbno1	3.26329e-09	-0.255991	0.405	0.463	2.59269e-05
Tsc22d3	3.27011e-09	-0.24685	0.771	0.786	2.59811e-05
Dusp16	3.33902e-09	0.21374	0.655	0.608	2.65285e-05
Recql5	3.35681e-09	-0.510387	0.138	0.182	2.66698e-05
Tgfbr1	3.39521e-09	-0.306576	0.369	0.422	2.69749e-05
Ndrg2	3.48524e-09	-0.213405	0.729	0.753	2.76902e-05
Adgra3	3.49345e-09	-0.362073	0.275	0.326	2.77555e-05
Mpdz	3.52447e-09	0.428867	0.212	0.164	2.80019e-05
Ccdc25	3.53531e-09	-0.397372	0.164	0.212	2.8088e-05
Clk2	3.61321e-09	-0.493371	0.135	0.179	2.87069e-05
Rfx1	3.62485e-09	-0.656276	0.065	0.099	2.87994e-05
Gm7160	3.63841e-09	0.464415	0.145	0.103	2.89072e-05
Aatf	3.64626e-09	-0.251376	0.409	0.465	2.89695e-05
Cbx4	3.66971e-09	0.578479	0.104	0.068	2.91558e-05
Sf3a1	3.79177e-09	-0.590252	0.067	0.101	3.01256e-05
Sesn3	3.83527e-09	0.480065	0.153	0.111	3.04712e-05
Btbd8	3.8742e-09	0.777569	0.08	0.049	3.07805e-05
Sardh	3.89525e-09	0.222327	0.423	0.363	3.09477e-05
Appl1	3.89951e-09	0.547477	0.139	0.098	3.09816e-05
Supt20	3.92035e-09	0.280409	0.351	0.294	3.11472e-05
Nab1	3.93997e-09	0.360393	0.275	0.222	3.13031e-05
Ctcfl	3.97064e-09	-0.494643	0.134	0.178	3.15467e-05
Ndufa6	4.04713e-09	0.419564	0.248	0.198	3.21545e-05
Acsl1	4.13426e-09	-0.382453	0.888	0.877	3.28467e-05
Lap3	4.15949e-09	0.29464	0.389	0.333	3.30472e-05
Pex11g	4.17199e-09	0.423337	0.204	0.156	3.31464e-05
Tacc2	4.18904e-09	0.152684	0.784	0.74	3.32819e-05
Timm44	4.19067e-09	-0.471878	0.172	0.219	3.32949e-05
Eif4g2	4.19879e-09	-0.26121	0.401	0.458	3.33593e-05
1110002L01Rik	4.26172e-09	-0.530858	0.15	0.194	3.38593e-05
Rspry1	4.33442e-09	-0.25254	0.341	0.398	3.4437e-05
Fbxo3	4.41596e-09	0.264003	0.426	0.369	3.50848e-05
3110021N24Rik	4.43952e-09	0.450875	0.205	0.159	3.5272e-05
Acat1	4.46457e-09	0.204467	0.676	0.638	3.5471e-05
Rae1	4.48028e-09	-0.525503	0.084	0.122	3.55958e-05
Ralgps2	4.52041e-09	0.361038	0.273	0.221	3.59147e-05
Ano6	4.52354e-09	0.495012	0.129	0.09	3.59396e-05
Rps2	4.5793e-09	0.469347	0.269	0.22	3.63825e-05
Grk5	4.62452e-09	-0.450446	0.183	0.23	3.67418e-05
Mpp6	4.64575e-09	-0.232476	0.493	0.544	3.69105e-05
Rbm34	4.67516e-09	-0.490266	0.101	0.141	3.71442e-05
Wwox	4.69896e-09	-0.105769	0.876	0.91	3.73332e-05
Nbeal1	4.73575e-09	-0.176903	0.669	0.713	3.76255e-05
Yod1	4.74061e-09	-0.380293	0.192	0.244	3.76641e-05
Senp3	4.83158e-09	-0.574355	0.088	0.126	3.83869e-05
Sra1	5.02904e-09	-0.390674	0.163	0.211	3.99557e-05
Ubqln1	5.06741e-09	-0.371826	0.27	0.32	4.02606e-05
Hmg20b	5.08036e-09	-0.500174	0.116	0.158	4.03634e-05
Serping1	5.13303e-09	0.160887	0.74	0.696	4.07819e-05
Dhrs1	5.13806e-09	0.532724	0.123	0.085	4.08219e-05
Itgb3bp	5.14607e-09	0.56887	0.089	0.057	4.08855e-05
Foxred1	5.17684e-09	-0.489704	0.102	0.143	4.113e-05
Ralgps1	5.29033e-09	0.43574	0.2	0.154	4.20316e-05
Ctnnbl1	5.30374e-09	-0.444772	0.185	0.232	4.21382e-05
Slc10a5	5.31544e-09	0.471791	0.164	0.122	4.22311e-05
Ubxn4	5.34066e-09	-0.183253	0.607	0.651	4.24316e-05
Snx24	5.36869e-09	0.246913	0.504	0.449	4.26542e-05
Myo1b	5.7232e-09	0.0988452	0.909	0.89	4.54708e-05
Gopc	5.75304e-09	-0.349937	0.281	0.331	4.57079e-05
Ube2f	5.83139e-09	-0.318773	0.235	0.287	4.63304e-05
Hlcs	5.85283e-09	0.460308	0.181	0.136	4.65007e-05
Ddx46	6.16938e-09	-0.23412	0.376	0.432	4.90157e-05
Avl9	6.17089e-09	0.348314	0.343	0.291	4.90277e-05
Tmem106a	6.1744e-09	-0.533488	0.105	0.145	4.90556e-05
Acsl5	6.25894e-09	0.224238	0.478	0.418	4.97273e-05
Pxdc1	6.27471e-09	0.479129	0.202	0.157	4.98526e-05
Anks1	6.31005e-09	-0.304449	0.302	0.358	5.01334e-05
Cspp1	6.31098e-09	-0.178319	0.682	0.714	5.01407e-05
Id3	6.35004e-09	0.496029	0.152	0.111	5.0451e-05
Dexi	6.41946e-09	-0.355907	0.179	0.228	5.10026e-05
[truncated: 5,946 more rows]

## Sheet: DEGs_Hepatocytes_MP_vs_Ctrl
	p_val	avg_log2FC	pct.1	pct.2	p_val_adj
Gm34667	0	1.44709	0.814	0.465	0
Bhmt	0	1.60835	0.768	0.425	0
Cth	0	1.97777	0.758	0.427	0
Dlc1	0	1.36756	0.804	0.493	0
Kng2	0	1.33938	0.846	0.552	0
Selenbp2	0	-2.00516	0.629	0.838	0
Mat1a	0	1.3655	0.983	0.82	0
Gm26917	0	-1.71156	0.786	0.944	0
Pah	0	1.06854	0.956	0.822	0
Hao1	0	-1.01647	0.806	0.928	0
Nfib	0	0.925183	0.949	0.838	0
C6	0	-1.0398	0.875	0.969	0
Cyp7b1	0	-2.19086	0.921	0.99	0
Atxn1	0	-1.10076	0.925	0.981	0
Ttc39c	0	-0.874641	0.981	0.994	0
Egfr	0	-1.54823	0.99	0.999	0
Zbtb20	0	-0.513962	0.998	0.996	0
Gm42418	2.85351e-304	-0.97561	0.992	0.999	2.26712e-300
Zbtb7c	2.71484e-300	-1.66292	0.443	0.719	2.15694e-296
Retreg1	1.49237e-277	1.91585	0.527	0.184	1.18569e-273
Bach2	2.17994e-267	-1.3875	0.584	0.806	1.73196e-263
Ces3b	2.73933e-256	-1.19825	0.536	0.798	2.1764e-252
Onecut1	2.60988e-248	-1.73906	0.315	0.613	2.07355e-244
Dhtkd1	4.69398e-243	1.121	0.75	0.485	3.72937e-239
C4a	1.1899e-239	-2.10669	0.254	0.541	9.45377e-236
Got1	2.96789e-237	1.26653	0.739	0.477	2.35799e-233
Pcx	3.09074e-237	0.881378	0.88	0.682	2.45559e-233
Abcc3	1.35517e-235	1.84062	0.486	0.175	1.07669e-231
Arhgef26	2.05558e-225	-0.783515	0.79	0.901	1.63316e-221
Cdo1	8.90567e-225	0.775309	0.9	0.653	7.07556e-221
Hmgcs2	1.18859e-221	-0.53356	0.991	0.992	9.44337e-218
Agxt	1.42233e-220	2.30836	0.394	0.112	1.13004e-216
Abat	2.06181e-220	1.54122	0.536	0.232	1.63811e-216
Fgg	3.35442e-220	0.877697	0.896	0.71	2.66509e-216
Rapgef4	6.561e-219	-0.478861	0.986	0.992	5.21271e-215
Fam13a	3.43045e-216	1.34397	0.601	0.29	2.72549e-212
Ctsl	2.64131e-215	1.46111	0.603	0.317	2.09852e-211
Lrrc4	1.5025e-214	1.05461	0.764	0.488	1.19373e-210
Dapk1	2.21008e-214	0.863801	0.856	0.65	1.75591e-210
Ugp2	2.29175e-213	0.93705	0.903	0.734	1.82079e-209
Gys2	3.0748e-209	1.11014	0.816	0.629	2.44293e-205
Igfbp1	1.57192e-206	1.14424	0.652	0.34	1.24889e-202
Vmp1	4.54516e-203	-0.76885	0.844	0.917	3.61113e-199
0610005C13Rik	4.20069e-202	0.922585	0.808	0.579	3.33745e-198
Gnmt	3.58741e-201	0.66848	0.975	0.895	2.8502e-197
Trf	8.21432e-194	0.740823	0.974	0.884	6.52628e-190
Upp2	1.31406e-191	0.916734	0.865	0.698	1.04402e-187
Apoa2	1.16898e-190	0.840785	0.952	0.859	9.28752e-187
Lpin1	3.56732e-189	-0.831624	0.884	0.928	2.83424e-185
Egfros	3.32786e-187	-0.788942	0.596	0.851	2.64398e-183
Dmgdh	6.42473e-185	1.24608	0.612	0.346	5.10445e-181
Etfbkmt	7.23637e-184	-1.15344	0.46	0.696	5.7493e-180
Sult1a1	5.93203e-183	1.34623	0.57	0.296	4.713e-179
4930517O19Rik	2.55455e-178	1.30117	0.537	0.257	2.02959e-174
Slc38a4	1.31449e-175	0.63242	0.981	0.933	1.04436e-171
Lima1	5.53332e-175	0.968357	0.722	0.488	4.39622e-171
Taco1	1.86061e-172	-2.11668	0.173	0.41	1.47825e-168
Sgms2	7.79013e-170	1.08014	0.619	0.356	6.18926e-166
Zfp385b	1.10268e-168	0.938486	0.72	0.486	8.76082e-165
Fnip2	1.30792e-168	1.04906	0.682	0.446	1.03914e-164
AY036118	2.44268e-167	-0.557186	0.961	0.977	1.94071e-163
Cyp2c70	2.23547e-166	-1.87223	0.39	0.592	1.77608e-162
Cyp3a25	4.9948e-166	0.726612	0.943	0.843	3.96837e-162
Rida	5.37759e-165	1.03208	0.692	0.471	4.2725e-161
Ppp2r5e	9.08137e-165	-0.670323	0.852	0.917	7.21515e-161
Zfp395	1.3712e-163	1.18143	0.596	0.343	1.08942e-159
Angptl8	3.88719e-161	-1.59228	0.269	0.51	3.08837e-157
Chka	4.6372e-161	0.828974	0.844	0.676	3.68426e-157
Ppp1r3b	8.46027e-161	-0.672606	0.824	0.916	6.72168e-157
Ccdc141	6.35893e-160	1.2091	0.563	0.309	5.05217e-156
Trp53inp1	1.18451e-159	0.893176	0.777	0.563	9.41093e-156
Scp2	1.40422e-159	-0.459717	0.98	0.992	1.11565e-155
Slc22a30	4.16963e-158	-0.47249	0.965	0.975	3.31277e-154
Pck1	1.30667e-157	0.376354	0.982	0.975	1.03815e-153
Kif21a	5.56807e-157	0.910228	0.75	0.548	4.42383e-153
Arl4a	1.29712e-156	1.37937	0.48	0.229	1.03056e-152
Ahsg	3.43987e-156	0.479596	0.992	0.968	2.73298e-152
Rbms1	6.36539e-156	0.78781	0.796	0.588	5.05731e-152
Cabyr	2.18889e-155	-1.68985	0.202	0.431	1.73908e-151
Nudt7	9.88402e-155	-0.702323	0.796	0.9	7.85286e-151
Hal	1.14887e-153	1.22708	0.679	0.527	9.12773e-150
Sult5a1	3.41555e-152	-1.81013	0.155	0.384	2.71366e-148
Rnf125	2.36772e-151	1.19403	0.541	0.294	1.88116e-147
Noct	5.94388e-151	-1.06724	0.482	0.686	4.72241e-147
Fchsd2	9.82834e-151	0.856911	0.796	0.636	7.80861e-147
Ppm1k	1.22297e-150	1.1861	0.52	0.269	9.71654e-147
Nr1h4	6.13667e-150	-0.505839	0.943	0.965	4.87559e-146
Tat	1.93038e-147	0.428514	0.985	0.949	1.53369e-143
Malat1	1.71823e-146	0.281362	0.999	1	1.36514e-142
Tsku	2.95178e-146	-2.2241	0.102	0.303	2.34519e-142
Apoe	9.25497e-146	0.656071	0.963	0.866	7.35308e-142
Lrrc28	1.40562e-145	-0.920214	0.668	0.805	1.11676e-141
Abca8a	1.42464e-145	1.27558	0.515	0.275	1.13188e-141
Alas1	1.53737e-144	-0.883815	0.662	0.816	1.22144e-140
Papss2	2.49962e-142	1.47672	0.421	0.19	1.98595e-138
Bhmt2	8.91164e-142	0.993044	0.612	0.37	7.0803e-138
Klf12	1.61069e-141	0.622272	0.917	0.864	1.2797e-137
Serpina1e	3.2105e-140	-1.00497	0.608	0.74	2.55074e-136
Mtss1	1.08552e-139	-0.389274	0.986	0.989	8.62447e-136
Mug2	6.87652e-139	0.656543	0.923	0.837	5.46339e-135
Nfia	5.3188e-137	0.411903	0.988	0.973	4.22579e-133
Fgb	3.0702e-136	0.653925	0.915	0.784	2.43927e-132
Kng1	7.98033e-136	0.706073	0.864	0.728	6.34038e-132
Etv6	1.52541e-135	-0.789449	0.662	0.793	1.21194e-131
Hpd	9.30544e-135	0.606655	0.916	0.778	7.39318e-131
C9	5.43611e-134	-1.21177	0.575	0.707	4.31899e-130
Slc17a4	1.31234e-133	1.65792	0.327	0.116	1.04266e-129
Crp	5.6008e-132	0.65773	0.866	0.742	4.44983e-128
Hc	2.56783e-131	-0.689303	0.912	0.943	2.04014e-127
Abcb4	3.07015e-131	-0.461297	0.94	0.969	2.43923e-127
Ppp1r3g	9.87751e-131	3.30697	0.171	0.02	7.84768e-127
Ttpa	2.24316e-130	0.736002	0.792	0.627	1.78219e-126
Adk	2.42518e-130	0.212727	0.998	0.997	1.9268e-126
Ptprd	3.72615e-129	0.363504	0.991	0.986	2.96043e-125
Dleu2	6.26741e-129	0.843821	0.732	0.55	4.97945e-125
Rnf169	1.61253e-128	-0.515673	0.884	0.933	1.28116e-124
Glud1	4.19573e-128	-0.601096	0.855	0.915	3.33351e-124
Slc16a2	2.46507e-127	0.968461	0.594	0.365	1.9585e-123
Cobl	3.78182e-126	-1.26261	0.31	0.519	3.00466e-122
Akr1d1	1.0023e-125	1.18537	0.503	0.279	7.96328e-122
Lpin2	2.27512e-125	-0.46739	0.959	0.976	1.80758e-121
Arhgef37	7.62322e-125	1.55015	0.342	0.135	6.05665e-121
Ypel2	2.52477e-124	0.891332	0.638	0.416	2.00593e-120
Itih3	1.26426e-123	-0.883217	0.763	0.853	1.00445e-119
Chn2	9.1863e-121	0.762709	0.724	0.536	7.29851e-117
Ctif	1.53362e-120	-0.650796	0.751	0.838	1.21846e-116
Mgll	2.00392e-120	-0.844453	0.581	0.733	1.59211e-116
Slc19a2	2.15403e-120	0.985195	0.579	0.361	1.71137e-116
Hnf4a	1.07301e-119	-0.644924	0.769	0.853	8.52507e-116
Ces1f	3.63569e-119	1.00909	0.533	0.301	2.88855e-115
Nsd3	8.01458e-119	-0.49882	0.887	0.927	6.36759e-115
Ext1	4.9972e-118	-0.646402	0.921	0.941	3.97028e-114
Glt1d1	3.61079e-115	0.887595	0.644	0.439	2.86877e-111
Abcb11	9.13331e-114	0.465199	0.976	0.946	7.25642e-110
Dcaf6	2.50882e-113	0.716998	0.751	0.572	1.99326e-109
Irs2	2.73443e-113	1.4635	0.329	0.134	2.17251e-109
Tspan12	4.96088e-112	0.681997	0.767	0.594	3.94142e-108
Gadd45g	1.32753e-111	0.864038	0.61	0.385	1.05473e-107
Tkfc	3.20097e-111	-0.897589	0.6	0.737	2.54317e-107
Nfil3	2.72172e-109	1.29037	0.387	0.186	2.1624e-105
Gck	6.7882e-109	-0.802727	0.513	0.69	5.39323e-105
Rsrp1	1.55158e-108	0.39172	0.969	0.923	1.23273e-104
Slc38a2	1.78454e-108	0.614331	0.887	0.798	1.41781e-104
Pdcd4	1.34237e-107	0.875531	0.624	0.428	1.06651e-103
Plin2	7.51519e-106	-0.979397	0.362	0.558	5.97082e-102
Ddc	9.50939e-106	-1.1363	0.514	0.656	7.55521e-102
Ivd	9.75322e-106	1.21346	0.39	0.189	7.74894e-102
Dpp4	1.15814e-105	0.778931	0.654	0.461	9.20139e-102
Cpeb2	3.77499e-105	0.520572	0.904	0.792	2.99923e-101
Mpc1	4.33628e-105	1.29779	0.367	0.172	3.44518e-101
Epb41	1.56378e-104	-0.519494	0.853	0.908	1.24243e-100
Amdhd1	1.64585e-104	0.853471	0.673	0.521	1.30763e-100
Hsd17b6	2.16143e-104	1.0543	0.519	0.315	1.71726e-100
Zbtb16	3.00268e-104	-0.42341	0.947	0.969	2.38563e-100
Apoa1	5.77426e-104	0.453288	0.977	0.922	4.58765e-100
Ahcy	1.13626e-101	0.771321	0.65	0.473	9.02755e-98
Dixdc1	4.11835e-101	1.42182	0.315	0.135	3.27203e-97
Slc38a3	5.23334e-101	0.511344	0.909	0.792	4.15789e-97
9030622O22Rik	6.49197e-101	-0.513548	0.924	0.952	5.15787e-97
Man2a1	1.67424e-100	-0.411812	0.927	0.953	1.33018e-96
Me1	1.10083e-99	-0.771288	0.644	0.765	8.74606e-96
Fign	1.57208e-99	1.14033	0.427	0.233	1.24902e-95
Nqo2	3.06352e-99	1.45081	0.291	0.116	2.43397e-95
Slc16a7	2.3203e-98	1.42927	0.304	0.126	1.84348e-94
Klb	2.59509e-98	1.10098	0.435	0.236	2.0618e-94
Aldh7a1	3.09314e-98	0.906104	0.532	0.334	2.4575e-94
Tcea3	9.48256e-98	1.62077	0.257	0.093	7.5339e-94
Map2k6	1.76267e-97	2.02216	0.21	0.062	1.40044e-93
Gulp1	2.34236e-97	-3.9241	0.016	0.121	1.861e-93
Camk1d	3.20047e-97	0.382792	0.973	0.936	2.54277e-93
Nr4a1	3.8723e-97	3.03478	0.146	0.024	3.07654e-93
Ankrd17	1.35917e-96	-0.444491	0.877	0.917	1.07986e-92
Slc25a25	1.09516e-95	0.524351	0.89	0.796	8.70104e-92
Ddah1	6.49865e-95	0.778815	0.587	0.388	5.16318e-91
Snx29	2.91444e-94	-0.785085	0.549	0.693	2.31553e-90
Sgk2	4.55393e-94	0.958013	0.471	0.275	3.6181e-90
Gsta3	5.09404e-94	0.576936	0.703	0.475	4.04721e-90
Scd1	6.92382e-94	1.10177	0.393	0.199	5.50097e-90
Slc22a28	1.63691e-93	-1.02335	0.301	0.485	1.30052e-89
Frmd4b	2.35874e-93	0.573884	0.856	0.717	1.87402e-89
Pon1	2.91004e-93	1.26214	0.406	0.224	2.31202e-89
Psmd9	5.12335e-93	0.747794	0.63	0.441	4.0705e-89
Prr16	6.50568e-93	0.336449	0.984	0.966	5.16876e-89
Marf1	3.31726e-92	0.68479	0.688	0.524	2.63556e-88
Shld2	4.01507e-92	-0.607424	0.666	0.783	3.18997e-88
Aldh6a1	4.71572e-91	0.875607	0.509	0.315	3.74664e-87
Wwox	6.01518e-91	-0.514091	0.849	0.91	4.77906e-87
Abcd3	7.93095e-91	-0.459342	0.863	0.907	6.30114e-87
Tnrc6b	1.09148e-90	0.484949	0.862	0.757	8.67183e-87
Slc25a30	2.21454e-90	-1.29899	0.23	0.406	1.75945e-86
Adap2	2.67518e-90	-1.00023	0.317	0.496	2.12543e-86
Aass	3.05964e-90	0.586708	0.891	0.801	2.43088e-86
Tmcc1	9.07079e-90	-0.416187	0.882	0.927	7.20674e-86
Arl4d	1.45247e-89	1.1449	0.373	0.191	1.15399e-85
Angptl4	1.57191e-89	-0.968204	0.322	0.506	1.24888e-85
Gm15622	4.26714e-89	1.4059	0.296	0.128	3.39024e-85
Lnx2	4.47417e-89	0.836431	0.558	0.379	3.55472e-85
Gm47818	5.95075e-89	1.55765	0.226	0.076	4.72787e-85
Itih2	6.4447e-89	0.670466	0.712	0.55	5.12032e-85
Eepd1	1.26651e-88	1.27237	0.324	0.15	1.00624e-84
Col18a1	1.5928e-88	0.419621	0.926	0.853	1.26548e-84
Ces3a	2.12012e-88	-0.55651	0.79	0.871	1.68444e-84
Adcy9	2.96012e-88	0.517823	0.803	0.677	2.35182e-84
Fads2	4.85468e-88	-0.641333	0.699	0.803	3.85704e-84
Dhdh	1.71695e-87	0.765463	0.57	0.388	1.36412e-83
Mapkapk2	3.45583e-86	0.861113	0.544	0.368	2.74565e-82
Rabep1	3.52858e-86	0.50251	0.841	0.729	2.80346e-82
Pxmp4	9.14207e-86	-0.639705	0.604	0.726	7.26337e-82
Rnf152	3.15788e-85	1.12902	0.388	0.212	2.50894e-81
Slc29a1	5.54735e-85	0.738759	0.625	0.452	4.40737e-81
Rapgef2	7.32967e-85	0.575546	0.777	0.643	5.82342e-81
Cyp8b1	2.01427e-84	1.20402	0.334	0.163	1.60034e-80
Ank3	1.39243e-83	1.37603	0.271	0.113	1.10628e-79
Hoga1	1.56833e-83	0.575703	0.742	0.587	1.24604e-79
Tfdp2	2.14462e-83	0.949275	0.439	0.255	1.7039e-79
Car8	5.26663e-83	1.03585	0.388	0.209	4.18434e-79
Ppargc1b	5.65624e-83	0.965553	0.446	0.265	4.49388e-79
Ccnd3	2.14169e-82	1.13432	0.37	0.198	1.70158e-78
Immp2l	3.82363e-82	-0.23214	0.996	0.996	3.03787e-78
Efna1	9.97431e-82	1.05237	0.404	0.228	7.92459e-78
Slc16a10	1.58223e-81	0.671965	0.751	0.582	1.25708e-77
Ccnl1	2.33246e-81	0.526552	0.811	0.691	1.85314e-77
Car3	3.18221e-81	0.868989	0.553	0.367	2.52827e-77
Gfra1	3.57621e-81	-0.37217	0.955	0.972	2.8413e-77
Slco1b2	2.10662e-80	0.523832	0.867	0.722	1.67371e-76
Btg2	3.1448e-79	1.95654	0.187	0.059	2.49854e-75
Pzp	3.22902e-79	0.344934	0.98	0.95	2.56545e-75
Phf8	1.83109e-78	-0.864959	0.405	0.559	1.4548e-74
Farp1	3.00825e-78	-0.829883	0.422	0.576	2.39006e-74
Mia3	4.26163e-78	0.581264	0.731	0.593	3.38587e-74
Hsp90b1	5.75737e-77	0.508653	0.883	0.806	4.57423e-73
Cdc14b	7.64051e-77	0.72539	0.564	0.391	6.07038e-73
Rasal2	4.40116e-76	-0.776819	0.461	0.612	3.49672e-72
Rarres2	4.45757e-76	1.42942	0.243	0.1	3.54154e-72
Acat3	6.64237e-76	0.754088	0.537	0.368	5.27736e-72
C4b	1.29474e-75	-0.939996	0.464	0.601	1.02867e-71
Rdh7	1.41155e-75	0.408775	0.917	0.853	1.12147e-71
Rere	2.0941e-75	-0.398246	0.883	0.924	1.66376e-71
Ero1lb	3.406e-75	0.666151	0.671	0.517	2.70606e-71
Sel1l	3.56758e-75	0.52724	0.755	0.604	2.83444e-71
Ngef	1.02783e-74	0.961056	0.42	0.25	8.16609e-71
Gstm1	1.08756e-74	1.09878	0.334	0.171	8.6407e-71
Slc8b1	3.58762e-73	0.823585	0.45	0.273	2.85037e-69
Celf2	1.25343e-72	-0.891183	0.446	0.586	9.95853e-69
Fn1	7.07299e-72	0.407855	0.92	0.824	5.61949e-68
Otc	7.26269e-72	0.568709	0.712	0.555	5.77021e-68
Necab1	1.47997e-71	0.566047	0.741	0.589	1.17583e-67
Glyat	1.61983e-71	-0.685017	0.572	0.692	1.28696e-67
Gpld1	1.88811e-71	0.666795	0.598	0.433	1.50011e-67
Tle4	1.98024e-71	-0.700806	0.57	0.687	1.5733e-67
Inmt	2.73982e-71	1.85785	0.173	0.055	2.17679e-67
Cyp2c23	2.93479e-71	0.743704	0.525	0.354	2.33169e-67
Mccc2	6.87972e-71	1.04228	0.332	0.174	5.46594e-67
Nf1	7.35803e-71	-0.512946	0.697	0.785	5.84596e-67
Gm2788	7.63228e-71	-1.31767	0.148	0.292	6.06385e-67
Grm8	1.16706e-70	-0.995396	0.365	0.512	9.2723e-67
Pxmp2	1.77237e-70	1.01791	0.324	0.167	1.40815e-66
Slc8a1	3.09473e-70	-1.40496	0.122	0.259	2.45876e-66
St6gal1	3.74711e-70	1.10543	0.344	0.189	2.97708e-66
Cyp4a14	4.12659e-70	1.71071	0.209	0.081	3.27858e-66
B630019A10Rik	4.39083e-70	0.626576	0.636	0.48	3.48851e-66
Ppm1b	4.98465e-70	0.439684	0.85	0.758	3.9603e-66
Sik1	1.16273e-69	1.03	0.392	0.234	9.23785e-66
Slc25a15	1.22235e-69	0.712318	0.57	0.413	9.71159e-66
Hhex	1.78072e-69	-1.13638	0.2	0.352	1.41478e-65
Zfand3	2.46705e-69	-0.379355	0.878	0.917	1.96007e-65
Ppara	2.82937e-69	-0.345108	0.95	0.969	2.24794e-65
Nipsnap1	7.9922e-69	0.801252	0.475	0.308	6.3498e-65
Cyb5a	1.09949e-68	0.499236	0.775	0.626	8.73542e-65
Sorbs2os	2.03587e-68	0.609194	0.543	0.363	1.6175e-64
Rxra	2.8251e-68	-0.76761	0.522	0.645	2.24454e-64
Fhit	1.02366e-67	-0.603331	0.665	0.771	8.133e-64
Stard5	2.09404e-67	0.678879	0.585	0.423	1.66371e-63
Crebrf	2.63302e-67	0.730202	0.511	0.343	2.09194e-63
Upb1	2.71313e-67	0.571603	0.682	0.536	2.15558e-63
Cisd1	2.88476e-67	1.12774	0.29	0.144	2.29195e-63
Psen2	2.94815e-67	0.79438	0.465	0.296	2.3423e-63
Grb14	4.60326e-67	0.439027	0.83	0.72	3.65729e-63
Mob3b	1.38328e-66	0.382282	0.925	0.866	1.09901e-62
Atp2a2	1.43474e-66	0.422083	0.901	0.823	1.1399e-62
Sdc4	3.18214e-66	0.4566	0.834	0.724	2.52821e-62
Zfp36l1	1.04355e-65	0.619254	0.697	0.55	8.29102e-62
Sil1	1.13612e-65	0.52542	0.738	0.615	9.0265e-62
Afmid	2.42318e-65	1.13132	0.287	0.144	1.92522e-61
Gm19619	3.06066e-65	-1.23489	0.137	0.273	2.43169e-61
Baz2b	3.77449e-65	-0.492931	0.743	0.81	2.99883e-61
Cmss1	5.24369e-65	-0.650587	0.7	0.789	4.16611e-61
Agtr1a	1.1043e-64	0.747063	0.489	0.328	8.77366e-61
Ttr	1.18429e-64	0.395914	0.97	0.905	9.40916e-61
Paics	1.23612e-64	0.940409	0.407	0.256	9.82096e-61
Ocln	1.69741e-64	0.784247	0.494	0.337	1.34859e-60
Gm13944	1.75826e-64	1.09145	0.301	0.155	1.39694e-60
Shmt1	2.99237e-64	0.619253	0.557	0.394	2.37744e-60
Ifrd1	5.42399e-64	0.644322	0.629	0.494	4.30936e-60
Arhgap42	7.50304e-64	-0.319166	0.938	0.958	5.96116e-60
Adam22	1.40227e-63	-2.23756	0.061	0.166	1.11411e-59
Syne1	1.49979e-63	0.892768	0.365	0.211	1.19159e-59
Plcl1	2.16319e-63	-1.9306	0.067	0.176	1.71865e-59
Abca8b	2.61024e-63	0.603828	0.642	0.489	2.07384e-59
Azgp1	2.64278e-63	0.31207	0.956	0.907	2.09969e-59
Slc22a18	3.52286e-63	1.20702	0.242	0.11	2.79891e-59
Osgin1	4.10454e-63	-1.55358	0.145	0.276	3.26106e-59
Agfg2	7.62182e-63	0.752045	0.467	0.306	6.05553e-59
Lipc	1.11332e-62	0.477153	0.764	0.631	8.84535e-59
Scara5	1.12506e-62	-0.925988	0.317	0.462	8.93863e-59
Zfp445	1.15466e-62	-0.563009	0.602	0.713	9.1738e-59
Junb	1.45863e-62	1.72199	0.19	0.074	1.15888e-58
Aldh1l1	1.94121e-62	0.439316	0.827	0.724	1.54229e-58
Itpr1	6.63879e-62	-0.41185	0.84	0.887	5.27452e-58
Nav2	8.5594e-62	0.570282	0.682	0.548	6.80044e-58
Rnf13	9.44031e-62	0.587603	0.625	0.469	7.50032e-58
Mfsd2a	9.54293e-62	-0.596109	0.57	0.695	7.58186e-58
Bcat2	1.0811e-61	0.862767	0.381	0.231	8.58934e-58
Cfhr1	1.11653e-61	0.529437	0.691	0.549	8.87086e-58
Hpgd	1.42263e-61	0.997953	0.29	0.149	1.13028e-57
Hibadh	1.8883e-61	0.516312	0.684	0.533	1.50026e-57
Mgst1	1.94167e-61	0.527994	0.838	0.743	1.54265e-57
Arg1	4.0561e-61	0.457042	0.833	0.765	3.22257e-57
Gm13613	4.47798e-61	1.10225	0.293	0.154	3.55776e-57
F11	5.11109e-61	0.723773	0.514	0.363	4.06076e-57
Gpcpd1	5.58904e-61	0.497642	0.722	0.569	4.4405e-57
Tango2	7.36979e-61	0.784688	0.457	0.301	5.85529e-57
Tiparp	1.02036e-60	1.49669	0.206	0.087	8.10674e-57
Cxcl12	2.9174e-60	0.739534	0.469	0.311	2.31787e-56
Arhgef7	3.21375e-60	0.977938	0.343	0.198	2.55333e-56
Hadha	9.1088e-60	-0.750294	0.393	0.53	7.23694e-56
Gls2	9.26898e-60	0.674863	0.615	0.512	7.3642e-56
Pklr	1.47357e-59	-0.710852	0.451	0.582	1.17076e-55
Fgd4	1.5392e-59	0.638296	0.581	0.436	1.22289e-55
Sh3pxd2a	7.28046e-59	0.731746	0.448	0.292	5.78432e-55
Chpt1	7.5838e-59	0.605598	0.565	0.413	6.02533e-55
Shb	8.19437e-59	-0.601644	0.676	0.748	6.51043e-55
Ablim3	8.90073e-59	-0.637423	0.549	0.664	7.07163e-55
Reps2	1.15507e-58	0.640357	0.547	0.39	9.17705e-55
Serpinb6a	1.24716e-58	1.00093	0.275	0.139	9.90868e-55
Acsl1	1.30004e-58	-0.723491	0.864	0.877	1.03288e-54
Carmil1	8.27661e-58	-0.527862	0.609	0.727	6.57576e-54
Insig2	9.62937e-58	0.485659	0.871	0.777	7.65054e-54
Gm43189	1.20043e-57	-0.544361	0.575	0.686	9.53743e-54
Wsb1	2.05148e-57	0.829737	0.584	0.469	1.6299e-53
Slco1a4	5.09753e-57	1.12461	0.26	0.131	4.04999e-53
Mbd1	6.02068e-57	-1.1491	0.326	0.457	4.78343e-53
Igfbp2	6.54152e-57	1.22108	0.238	0.115	5.19724e-53
Rbpms	7.61418e-57	-0.543069	0.857	0.885	6.04946e-53
Hexb	9.15881e-57	-1.18594	0.189	0.32	7.27668e-53
Ctcflos	1.38799e-56	-0.531657	0.699	0.782	1.10276e-52
Trim2	1.57644e-56	0.761625	0.426	0.274	1.25248e-52
Cry2	2.67236e-56	1.00798	0.274	0.141	2.12319e-52
Mrtfa	2.76344e-56	-0.740613	0.352	0.492	2.19555e-52
Klkb1	3.09548e-56	0.444025	0.769	0.653	2.45936e-52
Ddx5	4.68902e-56	0.276481	0.977	0.95	3.72542e-52
Gm47465	4.72523e-56	-1.01258	0.224	0.358	3.75419e-52
Lnpep	5.34908e-56	0.579252	0.595	0.451	4.24984e-52
Scamp1	6.62964e-56	0.798493	0.434	0.289	5.26725e-52
Agt	8.91586e-56	0.992963	0.316	0.179	7.08365e-52
Atg16l2	1.74981e-55	0.846705	0.387	0.244	1.39022e-51
Qdpr	2.13168e-55	0.897642	0.332	0.193	1.69362e-51
Bche	2.50709e-55	0.973414	0.326	0.187	1.99188e-51
Acss3	2.63075e-55	0.879559	0.394	0.252	2.09013e-51
Larp1b	2.68482e-55	0.402423	0.843	0.759	2.13309e-51
Dpy19l1	2.71063e-55	-0.625216	0.513	0.628	2.15359e-51
Colec12	2.88159e-55	0.496857	0.765	0.647	2.28942e-51
Aldh4a1	3.16756e-55	0.649638	0.475	0.321	2.51663e-51
Erbb3	3.47381e-55	0.678538	0.45	0.295	2.75994e-51
Etnppl	1.06609e-54	0.777483	0.574	0.45	8.4701e-51
Ldlr	1.54602e-54	0.498666	0.729	0.604	1.22831e-50
Fh1	1.93907e-54	0.693716	0.503	0.362	1.54059e-50
Rdh16	2.25508e-54	0.942782	0.323	0.188	1.79166e-50
Magt1	2.55542e-54	0.507984	0.658	0.518	2.03028e-50
Tsc22d3	6.5317e-54	-0.583287	0.716	0.786	5.18944e-50
Spata5	7.79391e-54	-0.754885	0.323	0.461	6.19226e-50
Ppp1r10	9.51948e-54	-0.768814	0.299	0.441	7.56323e-50
Tmem82	2.28421e-53	-1.05554	0.178	0.307	1.81481e-49
Mpp4	2.38086e-53	-1.05795	0.147	0.27	1.89159e-49
Rell1	7.07383e-53	0.769808	0.422	0.285	5.62015e-49
Pdk1	7.55383e-53	1.06916	0.26	0.136	6.00152e-49
Cmbl	1.22635e-52	1.05233	0.252	0.129	9.74338e-49
Fnip1	2.01725e-52	0.464556	0.699	0.566	1.60271e-48
Dusp1	3.02885e-52	-0.62656	0.504	0.62	2.40642e-48
Tulp2	3.58194e-52	0.852279	0.324	0.188	2.84585e-48
Dhx40	2.48515e-51	0.849837	0.349	0.212	1.97445e-47
Fga	4.07669e-51	0.413512	0.789	0.664	3.23893e-47
Irf2bp2	4.28216e-51	0.453454	0.708	0.572	3.40218e-47
Creb3l2	5.16061e-51	0.516623	0.556	0.402	4.10011e-47
Aadac	5.27125e-51	0.543533	0.626	0.493	4.18801e-47
Fmo1	6.76589e-51	0.812438	0.397	0.261	5.3755e-47
Cmtm8	7.92126e-51	0.47494	0.677	0.548	6.29344e-47
Neat1	1.30212e-50	-0.187972	0.996	0.996	1.03454e-46
Gm42413	1.66952e-50	0.844274	0.308	0.176	1.32644e-46
Cyp4a10	1.76749e-50	1.28656	0.21	0.099	1.40427e-46
Zfp970	2.24222e-50	-1.19501	0.121	0.234	1.78144e-46
Dsg2	2.59288e-50	0.793941	0.363	0.226	2.06004e-46
Agxt2	3.99465e-50	0.406399	0.791	0.69	3.17375e-46
Sorbs2	5.07636e-50	0.261845	0.955	0.904	4.03317e-46
Arntl	7.49275e-50	0.766234	0.382	0.243	5.95299e-46
Itsn1	7.73232e-50	0.696826	0.434	0.292	6.14333e-46
Stat5b	9.55831e-50	0.421871	0.777	0.673	7.59407e-46
Gm50136	1.18289e-49	-0.680783	0.425	0.549	9.39805e-46
Nox4	1.21218e-49	0.571331	0.593	0.462	9.63075e-46
Asph	2.32997e-49	0.670813	0.498	0.365	1.85116e-45
Golgb1	4.47433e-49	0.535014	0.602	0.474	3.55486e-45
Gm9968	6.59838e-49	-0.689663	0.252	0.391	5.24241e-45
Foxo3	6.69001e-49	0.415589	0.77	0.658	5.31521e-45
Gm10800	7.35512e-49	-2.45169	0.022	0.089	5.84364e-45
Zfand4	7.82754e-49	0.445083	0.756	0.642	6.21898e-45
Baiap2l1	1.09799e-48	-0.424578	0.739	0.801	8.72355e-45
Gm36041	1.30813e-48	0.731649	0.4	0.259	1.03931e-44
Creb3l3	1.6009e-48	-0.405556	0.738	0.799	1.27191e-44
Pter	1.73071e-48	0.473473	0.742	0.637	1.37505e-44
Ptprj	2.07388e-48	0.396598	0.775	0.663	1.6477e-44
Cers6	2.77974e-48	0.567868	0.482	0.339	2.2085e-44
Sardhos	3.00412e-48	0.78393	0.35	0.216	2.38677e-44
Prxl2c	6.56845e-48	0.825924	0.348	0.217	5.21863e-44
Cyp2j5	9.29615e-48	-0.359054	0.877	0.904	7.38579e-44
Pfkfb1	1.00049e-47	0.563903	0.519	0.377	7.94888e-44
Ppargc1a	1.34374e-47	0.620795	0.475	0.328	1.0676e-43
Gstt2	1.79095e-47	0.863539	0.349	0.22	1.42291e-43
Adgrl2	2.68701e-47	0.482489	0.601	0.464	2.13483e-43
Sco2	3.60441e-47	0.558635	0.538	0.394	2.8637e-43
Chsy3	5.44746e-47	-0.399433	0.828	0.877	4.32801e-43
Epb41l5	9.4988e-47	0.451489	0.641	0.508	7.54679e-43
Fam20a	1.03208e-46	0.509205	0.617	0.489	8.19989e-43
Ppfibp2	1.34377e-46	0.56563	0.516	0.377	1.06763e-42
Stard4	1.38317e-46	0.898498	0.328	0.202	1.09893e-42
Hipk2	3.23649e-46	-0.555428	0.537	0.641	2.57139e-42
Retsat	8.02932e-46	-1.17981	0.119	0.226	6.37929e-42
Atf6	1.05839e-45	0.370087	0.79	0.695	8.40894e-42
Mpzl2	1.18538e-45	0.9077	0.274	0.155	9.41788e-42
Depp1	1.35332e-45	0.988334	0.229	0.118	1.07521e-41
Gucd1	2.63262e-45	0.362019	0.787	0.679	2.09162e-41
Pid1	3.24948e-45	0.301691	0.978	0.972	2.58171e-41
Rpl10a	3.29452e-45	-0.753702	0.26	0.388	2.6175e-41
Arl13b	3.49742e-45	1.16153	0.178	0.08	2.7787e-41
C9orf72	5.72847e-45	0.82616	0.328	0.206	4.55127e-41
Zfp608	6.40974e-45	1.41665	0.144	0.056	5.09254e-41
Nrbf2	8.05794e-45	0.736315	0.382	0.255	6.40203e-41
Gm20319	8.35593e-45	-0.473405	0.693	0.759	6.63879e-41
Elovl5	9.23702e-45	0.562591	0.73	0.614	7.33881e-41
Gm11266	1.44026e-44	1.11512	0.234	0.126	1.14428e-40
Foxa3	1.50905e-44	-1.00205	0.183	0.298	1.19894e-40
Lars2	1.82945e-44	-0.729881	0.396	0.512	1.4535e-40
Sucnr1	1.92459e-44	1.4452	0.15	0.061	1.52909e-40
Gm49417	2.2352e-44	0.686745	0.406	0.274	1.77587e-40
Acad11	2.34855e-44	-0.39846	0.737	0.798	1.86593e-40
Cdh2	2.749e-44	-0.373712	0.913	0.929	2.18408e-40
Cyp3a11	2.99425e-44	0.423636	0.277	0.152	2.37893e-40
Pard3	3.20089e-44	-0.243265	0.96	0.967	2.54311e-40
Gch1	3.84821e-44	0.622615	0.495	0.364	3.05741e-40
Atoh8	4.45963e-44	1.11869	0.183	0.084	3.54317e-40
Pcgf5	5.05495e-44	0.5477	0.554	0.426	4.01616e-40
Lamp2	5.9166e-44	0.281355	0.897	0.827	4.70074e-40
Serpina1b	5.9485e-44	0.471041	0.735	0.62	4.72609e-40
Rbl2	5.98885e-44	0.749162	0.353	0.23	4.75814e-40
Adipor2	8.84357e-44	-0.371011	0.922	0.934	7.02621e-40
Abca6	1.12041e-43	0.25852	0.941	0.887	8.90169e-40
Dsc2	2.04135e-43	0.849836	0.296	0.177	1.62185e-39
Ifnar2	2.38461e-43	0.853756	0.257	0.143	1.89457e-39
Met	3.08386e-43	0.499794	0.574	0.447	2.45013e-39
Creg1	4.33524e-43	0.781981	0.351	0.228	3.44435e-39
Snx10	4.56192e-43	-0.838689	0.258	0.374	3.62445e-39
Fam13b	6.9843e-43	0.514331	0.585	0.459	5.54903e-39
Dennd5b	7.58325e-43	0.241207	0.955	0.916	6.02489e-39
Rab3gap1	7.77434e-43	-0.568977	0.453	0.564	6.17671e-39
Lgals4	1.00766e-42	-0.987102	0.159	0.269	8.00587e-39
Ptprg	1.24714e-42	-0.303592	0.896	0.92	9.90856e-39
Pqlc1	1.41584e-42	0.423084	0.732	0.617	1.12489e-38
Bcar3	1.57404e-42	0.529452	0.536	0.405	1.25058e-38
Gm4756	1.72498e-42	0.505288	0.54	0.407	1.37049e-38
Uggt1	1.89795e-42	0.587272	0.505	0.376	1.50792e-38
Arhgap18	1.90071e-42	0.818718	0.31	0.19	1.51011e-38
Sik3	2.29368e-42	-0.291473	0.889	0.907	1.82233e-38
Fggy	2.47861e-42	0.268525	0.923	0.88	1.96926e-38
Acaca	2.47964e-42	-0.295616	0.905	0.934	1.97007e-38
Scarb1	3.07393e-42	0.505222	0.568	0.436	2.44223e-38
Snd1	3.41909e-42	0.266889	0.921	0.876	2.71647e-38
Nnmt	3.77092e-42	0.668215	0.526	0.414	2.99599e-38
Sc5d	4.54888e-42	0.463027	0.687	0.581	3.61409e-38
Mthfd1	6.29422e-42	0.484085	0.561	0.429	5.00076e-38
Gfod1	6.99773e-42	1.17824	0.175	0.081	5.55969e-38
Grem2	8.38789e-42	-1.05024	0.264	0.371	6.66418e-38
Mlxipl	1.33487e-41	-0.304161	0.975	0.977	1.06056e-37
Bcl2l1	1.585e-41	0.665912	0.368	0.241	1.25929e-37
Serpina1d	1.76811e-41	0.662633	0.406	0.279	1.40476e-37
Degs1	3.75124e-41	0.976239	0.204	0.103	2.98036e-37
Ass1	3.80155e-41	0.299956	0.831	0.731	3.02033e-37
Nostrin	3.95257e-41	0.923669	0.247	0.139	3.14032e-37
Ndrg2	4.2468e-41	0.34419	0.844	0.753	3.37408e-37
Acaa2	4.56136e-41	-0.456362	0.607	0.69	3.624e-37
F5	6.14908e-41	0.34484	0.79	0.695	4.88544e-37
Trim14	6.42768e-41	0.71625	0.316	0.195	5.10679e-37
Gnpnat1	7.70842e-41	0.874296	0.263	0.151	6.12434e-37
Slc15a2	8.17014e-41	1.59544	0.111	0.038	6.49118e-37
Xdh	1.02039e-40	0.433602	0.649	0.532	8.10698e-37
Gm26708	1.07473e-40	0.916578	0.276	0.166	8.5387e-37
D5Ertd579e	2.17336e-40	-0.49542	0.613	0.695	1.72674e-36
Efna5	2.46011e-40	-0.728389	0.339	0.456	1.95456e-36
Lbp	2.66577e-40	0.753946	0.322	0.205	2.11795e-36
Erc2	3.04873e-40	-0.528188	0.6	0.688	2.42222e-36
Serping1	3.44891e-40	0.350377	0.788	0.696	2.74016e-36
Arhgap24	3.652e-40	-0.657213	0.458	0.56	2.90152e-36
Btg1	5.02795e-40	0.901542	0.246	0.139	3.99471e-36
Apoc1	5.27458e-40	0.44384	0.898	0.83	4.19065e-36
Hjurp	5.9115e-40	0.472359	0.623	0.516	4.69668e-36
Abhd17c	7.21461e-40	0.548966	0.509	0.388	5.73201e-36
Eml6	7.23469e-40	1.56887	0.139	0.058	5.74796e-36
Gabarapl1	8.7195e-40	0.663575	0.352	0.229	6.92764e-36
Il1r1	9.19321e-40	-0.510653	0.711	0.781	7.30401e-36
2002-03-01	9.47319e-40	0.46631	0.597	0.473	7.52645e-36
Wipf3	9.60244e-40	0.931968	0.215	0.113	7.62914e-36
Apoc4	1.07491e-39	0.549818	0.579	0.461	8.5402e-36
Clmn	1.23845e-39	0.359304	0.766	0.668	9.83945e-36
Esr1	1.55352e-39	-0.921535	0.257	0.366	1.23427e-35
Smim13	1.64713e-39	0.830754	0.272	0.161	1.30865e-35
Hipk3	1.8747e-39	0.597629	0.432	0.306	1.48945e-35
Inhba	2.32259e-39	-0.914173	0.228	0.339	1.84529e-35
Tns1	2.55586e-39	-0.391766	0.734	0.798	2.03063e-35
Ivns1abp	2.66443e-39	0.485896	0.642	0.532	2.11689e-35
Brd2	3.01826e-39	-0.731683	0.246	0.361	2.39801e-35
Fbxo21	3.64877e-39	0.715986	0.342	0.222	2.89895e-35
Adhfe1	4.06462e-39	0.586615	0.402	0.276	3.22934e-35
Ralgps2	5.03586e-39	0.746008	0.338	0.221	4.00099e-35
Nt5c2	5.88158e-39	0.563283	0.486	0.365	4.67291e-35
Akr1c6	6.40388e-39	0.356867	0.571	0.419	5.08788e-35
Mblac2	6.61436e-39	1.07375	0.187	0.093	5.25511e-35
Gk	6.68949e-39	0.343708	0.726	0.598	5.3148e-35
Vwa8	8.50178e-39	-0.226833	0.965	0.969	6.75467e-35
Gm29966	9.77529e-39	-0.343542	0.895	0.918	7.76647e-35
Gpd1l	1.19011e-38	1.31897	0.127	0.049	9.45544e-35
Nr0b2	1.7345e-38	-0.987218	0.332	0.431	1.37806e-34
Svil	1.7695e-38	0.489406	0.578	0.456	1.40587e-34
Abcg8	2.10343e-38	0.60688	0.487	0.364	1.67118e-34
4833411C07Rik	2.22585e-38	0.730023	0.338	0.222	1.76843e-34
Pcyt2	2.59589e-38	-0.274914	0.978	0.98	2.06244e-34
Ppan	2.67414e-38	-1.27164	0.068	0.149	2.1246e-34
Syvn1	3.11391e-38	0.574056	0.557	0.443	2.474e-34
Slc17a2	3.16034e-38	0.378631	0.765	0.678	2.51089e-34
Ptbp3	6.21246e-38	0.436005	0.651	0.541	4.9358e-34
Ddt	7.26587e-38	0.725019	0.33	0.214	5.77274e-34
Serpina3n	9.37267e-38	0.967354	0.241	0.139	7.44659e-34
Pgrmc1	9.76805e-38	0.686417	0.378	0.261	7.76071e-34
Kif1b	1.1717e-37	0.313218	0.842	0.771	9.30913e-34
Ldlrad4	1.49715e-37	-0.580744	0.463	0.569	1.18948e-33
Sardh	1.5523e-37	0.531749	0.485	0.363	1.2333e-33
Slc25a13	1.65551e-37	0.195887	0.975	0.954	1.3153e-33
Sel1l3	3.21575e-37	0.588015	0.412	0.289	2.55491e-33
Mbl2	3.77784e-37	0.788233	0.305	0.194	3.0015e-33
Phldb2	4.42202e-37	0.40645	0.667	0.562	3.51329e-33
Insig1	4.48002e-37	0.458791	0.661	0.547	3.55938e-33
Spred2	4.73246e-37	0.518701	0.47	0.345	3.75994e-33
Gm826	5.45178e-37	-1.05818	0.105	0.196	4.33144e-33
Aox3	7.37474e-37	-0.857852	0.889	0.899	5.85923e-33
Tcirg1	1.00297e-36	-1.3149	0.082	0.165	7.96861e-33
Hsd17b12	1.09882e-36	-0.478069	0.565	0.648	8.73013e-33
Ube2b	1.2162e-36	0.363383	0.742	0.648	9.66267e-33
Selenop	2.49042e-36	0.285154	0.946	0.882	1.97864e-32
Map3k5	2.57501e-36	0.268501	0.873	0.799	2.04585e-32
Cyp2e1	2.73311e-36	0.455412	0.481	0.347	2.17146e-32
Shank2	3.60099e-36	-0.690345	0.307	0.417	2.86099e-32
Stard10	4.55244e-36	-0.463322	0.568	0.653	3.61691e-32
Dennd4a	4.77433e-36	0.425886	0.623	0.507	3.79321e-32
Cdk19	5.14495e-36	0.599044	0.418	0.3	4.08766e-32
Nt5c3	7.27677e-36	0.837267	0.24	0.14	5.78139e-32
2001-03-01	8.12883e-36	0.254157	0.894	0.829	6.45836e-32
Gm4951	1.21213e-35	-0.248708	0.896	0.918	9.63037e-32
Hamp	1.43911e-35	0.963339	0.473	0.368	1.14337e-31
Eva1a	1.54538e-35	0.319496	0.819	0.739	1.22781e-31
Ghr	2.16771e-35	-0.316061	0.998	0.997	1.72224e-31
Ppp1r9a	4.12764e-35	-0.572785	0.411	0.523	3.27941e-31
Bcl7c	4.1314e-35	-0.974905	0.162	0.259	3.2824e-31
Bphl	4.39885e-35	0.539784	0.436	0.318	3.49488e-31
Lifr	5.58616e-35	-0.52927	0.664	0.716	4.43821e-31
Gcdh	6.00212e-35	0.561057	0.374	0.255	4.76869e-31
Hrg	6.2227e-35	0.477437	0.601	0.492	4.94394e-31
Lipg	7.66876e-35	-0.825826	0.286	0.388	6.09283e-31
Nbr1	8.08168e-35	0.357539	0.738	0.645	6.4209e-31
Fpgs	8.22813e-35	-0.381072	0.689	0.753	6.53725e-31
Ambp	8.43802e-35	-0.530084	0.457	0.559	6.704e-31
Gpt	9.21964e-35	0.72203	0.275	0.17	7.325e-31
Cd302	9.4985e-35	0.400627	0.644	0.531	7.54656e-31
Alb	1.32836e-34	0.274199	0.998	0.985	1.05539e-30
Pcmtd1	1.43988e-34	0.311987	0.811	0.736	1.14399e-30
Daam1	1.5067e-34	0.391575	0.653	0.55	1.19708e-30
Phka2	1.52281e-34	0.65856	0.324	0.213	1.20987e-30
Pnpla7	1.92766e-34	0.413733	0.575	0.465	1.53153e-30
Arid5b	2.48463e-34	0.239483	0.953	0.922	1.97404e-30
Cyp2d9	2.70135e-34	-0.279772	0.778	0.847	2.14622e-30
St3gal4	3.13413e-34	-0.348167	0.806	0.85	2.49006e-30
Ptpn3	3.27596e-34	0.557486	0.42	0.302	2.60275e-30
Mup14	4.43209e-34	-0.935679	0.099	0.184	3.5213e-30
Slc17a8	4.63816e-34	1.02506	0.179	0.093	3.68502e-30
Atxn2	4.7143e-34	0.233625	0.93	0.886	3.74551e-30
Decr1	4.73424e-34	-0.551195	0.369	0.474	3.76135e-30
Rhobtb1	4.90196e-34	0.269243	0.887	0.824	3.89461e-30
B2m	5.54216e-34	0.633588	0.425	0.312	4.40324e-30
Cited2	5.92445e-34	1.21101	0.14	0.064	4.70697e-30
Nlrp6	6.01987e-34	-0.461295	0.583	0.674	4.78278e-30
Tmem51	6.41451e-34	1.37313	0.106	0.04	5.09632e-30
Tead1	7.05967e-34	-0.775519	0.273	0.376	5.60891e-30
Klf10	7.89286e-34	-0.682771	0.269	0.375	6.27088e-30
Npc1	8.45338e-34	0.405241	0.624	0.515	6.71621e-30
Samd8	8.97705e-34	0.768091	0.274	0.173	7.13226e-30
Brap	1.08234e-33	0.369466	0.665	0.559	8.59918e-30
Eif1	1.11178e-33	0.447147	0.527	0.409	8.83311e-30
Pgap1	1.32833e-33	0.665306	0.346	0.236	1.05536e-29
2006-03-01	1.34393e-33	0.378447	0.672	0.584	1.06775e-29
4732463B04Rik	1.64883e-33	1.14995	0.154	0.075	1.30999e-29
Arhgap6	1.77368e-33	0.446268	0.534	0.421	1.40919e-29
Slc15a4	1.79866e-33	0.539936	0.382	0.264	1.42904e-29
Slc25a20	1.8664e-33	-0.589888	0.329	0.439	1.48286e-29
AI480526	2.46326e-33	0.61773	0.366	0.257	1.95706e-29
4732419C18Rik	2.66318e-33	0.829538	0.277	0.178	2.1159e-29
Mdn1	2.99167e-33	-0.758163	0.219	0.32	2.37688e-29
Mindy2	3.17396e-33	0.512326	0.432	0.313	2.52171e-29
Snx24	3.18287e-33	0.431338	0.566	0.449	2.52879e-29
Pipox	3.22423e-33	0.413714	0.583	0.468	2.56165e-29
Acot12	3.31082e-33	0.353534	0.764	0.675	2.63044e-29
Ppip5k2	3.39326e-33	-0.477241	0.562	0.642	2.69594e-29
Zhx3	3.45391e-33	-0.310533	0.75	0.817	2.74413e-29
Eps15	3.45873e-33	-0.455115	0.453	0.557	2.74796e-29
C3	3.65326e-33	-0.674764	0.597	0.651	2.90252e-29
Ap3b1	3.91374e-33	0.322581	0.752	0.672	3.10947e-29
Mitf	5.20362e-33	0.518902	0.455	0.341	4.13428e-29
Car5a	5.53953e-33	0.651791	0.282	0.178	4.40115e-29
Agl	6.03027e-33	0.632664	0.382	0.274	4.79105e-29
Garem1	9.88207e-33	0.316208	0.791	0.707	7.85131e-29
Anp32a	1.41515e-32	0.648672	0.324	0.219	1.12433e-28
Cyp2f2	1.41813e-32	-0.46579	0.595	0.652	1.1267e-28
Fam47e	1.426e-32	-1.01908	0.143	0.234	1.13295e-28
Tdo2	1.50405e-32	0.136678	0.968	0.906	1.19497e-28
Bag4	1.57855e-32	0.584988	0.366	0.258	1.25416e-28
Taok3	1.99052e-32	0.269646	0.844	0.769	1.58147e-28
Tmem205	2.31401e-32	0.556864	0.418	0.307	1.83848e-28
Il18	2.49942e-32	1.411	0.117	0.049	1.98579e-28
Scfd2	2.50906e-32	0.448249	0.565	0.457	1.99345e-28
Lrrfip1	2.74967e-32	0.481191	0.431	0.316	2.18461e-28
Pgm1	4.50748e-32	0.446155	0.508	0.391	3.58119e-28
Josd2	4.67303e-32	-0.714605	0.272	0.374	3.71272e-28
Chp1	5.07337e-32	0.401948	0.548	0.43	4.03079e-28
Deptor	5.20272e-32	0.222207	0.907	0.834	4.13356e-28
Zfp707	5.4256e-32	0.695079	0.306	0.204	4.31064e-28
Kdm2b	6.99106e-32	1.07764	0.161	0.082	5.55439e-28
Nr5a2	7.51995e-32	0.317776	0.785	0.685	5.9746e-28
Fmn1	7.68342e-32	0.80561	0.289	0.189	6.10448e-28
Mafg	8.25159e-32	0.423475	0.533	0.422	6.55589e-28
4632427E13Rik	9.34517e-32	-0.503298	0.464	0.554	7.42473e-28
Nek7	1.1143e-31	-0.360399	0.693	0.762	8.85311e-28
Gamt	1.20006e-31	1.1236	0.133	0.061	9.53451e-28
Tmem19	1.51063e-31	0.532162	0.399	0.286	1.20019e-27
Snhg11	1.57628e-31	0.880715	0.255	0.161	1.25236e-27
P2rx4	1.69363e-31	0.68454	0.259	0.161	1.34559e-27
Slc47a1	1.78906e-31	0.537429	0.432	0.323	1.42141e-27
Foxq1	1.94381e-31	1.27417	0.154	0.078	1.54436e-27
Plscr2	2.06758e-31	1.15679	0.137	0.064	1.64269e-27
Ern1	2.07463e-31	-0.342636	0.818	0.852	1.64829e-27
Abhd14b	2.18722e-31	0.560912	0.36	0.251	1.73775e-27
Coq10b	3.55339e-31	0.658367	0.359	0.254	2.82317e-27
Etnk2	3.70712e-31	0.323815	0.717	0.61	2.94531e-27
Sfxn2	3.75929e-31	0.642312	0.321	0.218	2.98676e-27
Atp8b1	3.77848e-31	0.488649	0.499	0.392	3.002e-27
Tram1	3.9271e-31	0.493325	0.457	0.345	3.12008e-27
Tbc1d31	4.17292e-31	0.939127	0.191	0.107	3.31539e-27
Sec24d	5.80904e-31	0.307086	0.764	0.673	4.61528e-27
Cmip	6.14277e-31	0.461654	0.459	0.347	4.88043e-27
Comt	6.14652e-31	0.286278	0.821	0.738	4.88341e-27
Apobec1	6.6448e-31	-0.604461	0.341	0.443	5.2793e-27
Coq8a	7.35161e-31	0.606859	0.34	0.234	5.84085e-27
Cyp2a5	7.58599e-31	1.26961	0.16	0.083	6.02707e-27
Slc16a12	8.8753e-31	0.579705	0.317	0.211	7.05143e-27
Myo1e	8.94439e-31	-0.368121	0.831	0.849	7.10632e-27
Gns	9.09125e-31	0.507741	0.457	0.347	7.223e-27
Mrnip	1.12638e-30	0.702886	0.211	0.121	8.94908e-27
Cyp27a1	1.4237e-30	0.401849	0.627	0.524	1.13113e-26
Hgd	1.53789e-30	0.289908	0.927	0.902	1.22185e-26
Khk	2.14076e-30	-0.551174	0.469	0.551	1.70083e-26
Fbxo31	2.14494e-30	0.69825	0.277	0.18	1.70416e-26
Tle1	2.9224e-30	-0.409962	0.634	0.703	2.32185e-26
Fam135a	4.32822e-30	-0.395715	0.592	0.668	3.43877e-26
Tmem106b	4.49645e-30	0.515869	0.426	0.319	3.57243e-26
Gm36264	4.59625e-30	-0.454067	0.591	0.668	3.65172e-26
Aplp2	4.81091e-30	0.464364	0.471	0.363	3.82226e-26
Sh3d19	5.01019e-30	0.263009	0.868	0.825	3.9806e-26
BC049987	6.19822e-30	0.696374	0.296	0.196	4.92448e-26
Arhgef3	6.54699e-30	-0.462056	0.536	0.622	5.20158e-26
Bcas3	7.28911e-30	-0.30812	0.783	0.823	5.7912e-26
Ttc23	7.34938e-30	-0.391903	0.674	0.727	5.83908e-26
Abcc2	8.3001e-30	0.189175	0.978	0.953	6.59443e-26
Zhx2	8.35844e-30	-0.505195	0.448	0.54	6.64078e-26
Hook1	9.86965e-30	0.490295	0.431	0.326	7.84143e-26
Mpzl1	1.82533e-29	1.16207	0.105	0.043	1.45022e-25
Aopep	1.96033e-29	-0.381566	0.727	0.769	1.55748e-25
Nucb1	2.07943e-29	0.911231	0.188	0.107	1.65211e-25
2900026A02Rik	2.79812e-29	0.38033	0.612	0.505	2.22311e-25
Nek6	2.81048e-29	-0.784959	0.193	0.284	2.23293e-25
Phlpp1	2.96803e-29	0.27409	0.826	0.755	2.3581e-25
Zfp950	3.2131e-29	0.378185	0.591	0.491	2.55281e-25
Ralgapa2	3.26034e-29	0.210906	0.956	0.932	2.59034e-25
Tef	3.54904e-29	0.478724	0.42	0.307	2.81971e-25
Pecr	4.29998e-29	0.413535	0.497	0.387	3.41634e-25
Gm47719	4.49556e-29	0.601827	0.341	0.241	3.57172e-25
Zfp407	4.77987e-29	-0.342825	0.739	0.783	3.7976e-25
Cux1	4.88116e-29	-0.418766	0.531	0.616	3.87808e-25
Hspa4l	5.05833e-29	0.944904	0.18	0.101	4.01885e-25
Hdc	5.53038e-29	-1.20477	0.063	0.13	4.39388e-25
Cluh	5.62189e-29	-0.636482	0.441	0.522	4.46659e-25
Tob2	6.31598e-29	-0.57883	0.319	0.421	5.01804e-25
Glyctk	6.73775e-29	-0.470943	0.513	0.597	5.35314e-25
Idh2	7.62906e-29	1.05368	0.123	0.057	6.06128e-25
Mbnl2	8.47088e-29	0.269017	0.694	0.589	6.73011e-25
Keg1	9.03699e-29	-0.497199	0.476	0.564	7.17989e-25
Fer	9.33082e-29	-0.637913	0.243	0.34	7.41334e-25
Tmbim6	1.18633e-28	0.407227	0.557	0.453	9.42537e-25
Gm48877	1.26673e-28	0.809052	0.183	0.102	1.00642e-24
Dbt	1.36404e-28	0.956968	0.155	0.081	1.08373e-24
Klhl24	1.76936e-28	0.400864	0.549	0.439	1.40576e-24
Adap2os	1.93757e-28	-0.57555	0.235	0.337	1.5394e-24
Spcs3	2.0065e-28	0.939791	0.166	0.09	1.59417e-24
Auh	2.18128e-28	0.646748	0.297	0.201	1.73302e-24
Cyp4a32	2.19418e-28	0.661318	0.408	0.312	1.74327e-24
Prkag2	2.29326e-28	0.313012	0.731	0.654	1.82199e-24
Arhgap32	2.31144e-28	-0.417286	0.545	0.624	1.83644e-24
Tns3	2.44732e-28	-0.655539	0.278	0.372	1.9444e-24
Rock2	2.48901e-28	-0.408805	0.614	0.679	1.97752e-24
Psd3	2.51694e-28	0.225054	0.919	0.882	1.99971e-24
Sox5	2.74061e-28	0.224986	0.915	0.884	2.17742e-24
Nsmf	3.03079e-28	-0.597166	0.318	0.415	2.40797e-24
Tmem131l	3.1783e-28	0.313846	0.662	0.556	2.52516e-24
Gle1	3.49961e-28	0.683094	0.284	0.188	2.78044e-24
Fech	3.54238e-28	0.462256	0.48	0.381	2.81442e-24
Hectd1	3.72047e-28	-0.258329	0.825	0.861	2.95592e-24
Rgn	3.7616e-28	0.684431	0.244	0.153	2.98859e-24
Fbxo3	5.75903e-28	0.450597	0.475	0.369	4.57555e-24
Oaz1	7.26975e-28	0.412773	0.504	0.395	5.77582e-24
Nadk2	7.6214e-28	0.428202	0.489	0.384	6.0552e-24
Zfyve21	8.65342e-28	1.02684	0.15	0.078	6.87515e-24
Plin3	1.01544e-27	0.972017	0.142	0.072	8.06768e-24
Ttc3	1.08202e-27	0.717525	0.226	0.14	8.59668e-24
Pemt	1.13531e-27	0.435249	0.449	0.343	9.02e-24
Acacb	1.22173e-27	-0.530211	0.464	0.546	9.70668e-24
0610043K17Rik	1.25014e-27	-0.503315	0.496	0.573	9.93234e-24
Sun1	1.25534e-27	1.07239	0.136	0.068	9.97369e-24
Brd4	1.26031e-27	-0.307456	0.751	0.79	1.00132e-23
Pex14	1.27285e-27	-0.343542	0.648	0.703	1.01128e-23
Aven	1.3152e-27	-0.579549	0.307	0.404	1.04492e-23
Neu2	1.3182e-27	0.813836	0.218	0.135	1.04731e-23
Mmut	1.32712e-27	0.804852	0.226	0.142	1.0544e-23
Rel	1.79583e-27	0.876403	0.189	0.11	1.42679e-23
Tbccd1	1.96703e-27	0.661793	0.269	0.176	1.5628e-23
Ttyh2	2.03497e-27	-0.637173	0.277	0.371	1.61678e-23
Hsd3b5	2.236e-27	-0.711475	0.172	0.261	1.7765e-23
Csad	2.23989e-27	0.565106	0.319	0.224	1.77959e-23
Zfhx4	2.39146e-27	0.302257	0.702	0.597	1.90001e-23
Enpp3	2.44649e-27	0.391901	0.544	0.436	1.94373e-23
Arhgap12	2.69255e-27	0.406165	0.541	0.441	2.13923e-23
Ppat	3.09954e-27	0.63429	0.281	0.188	2.46258e-23
9130016M20Rik	3.3573e-27	0.460804	0.437	0.333	2.66738e-23
Rgs16	3.85313e-27	0.641377	0.28	0.187	3.06131e-23
Cgnl1	4.00144e-27	-0.432285	0.534	0.614	3.17915e-23
Echs1	4.39502e-27	0.632281	0.273	0.179	3.49185e-23
Pm20d1	4.96973e-27	0.623311	0.297	0.202	3.94845e-23
Lurap1l	5.07897e-27	-0.332382	0.708	0.769	4.03524e-23
Spata13	5.83872e-27	0.379591	0.57	0.473	4.63886e-23
Cpeb3	6.65592e-27	0.325548	0.675	0.584	5.28813e-23
Reck	7.26308e-27	0.642803	0.321	0.229	5.77052e-23
Srsf5	7.39948e-27	0.243749	0.855	0.8	5.87889e-23
Echdc3	7.80122e-27	0.606887	0.292	0.199	6.19807e-23
Sema4a	9.42113e-27	0.522949	0.331	0.231	7.48509e-23
Ddb1	1.0082e-26	-0.705285	0.239	0.33	8.01015e-23
Gm49797	1.16973e-26	-0.564433	0.365	0.454	9.29352e-23
Ahctf1	1.29331e-26	0.398416	0.53	0.435	1.02753e-22
Cbs	1.32541e-26	0.352338	0.682	0.596	1.05304e-22
Hykk	1.65566e-26	0.29121	0.736	0.644	1.31542e-22
Srbd1	1.81668e-26	0.38847	0.451	0.342	1.44335e-22
Fam124a	1.87875e-26	-1.11943	0.144	0.221	1.49267e-22
Pex7	2.18709e-26	0.427548	0.503	0.405	1.73764e-22
Abhd18	2.23574e-26	0.373275	0.583	0.483	1.77629e-22
Sar1b	2.25699e-26	-0.383657	0.558	0.626	1.79318e-22
Ak3	2.36932e-26	0.47833	0.363	0.261	1.88242e-22
Zfp598	2.53829e-26	-0.647589	0.222	0.314	2.01667e-22
G0s2	2.629e-26	-0.706378	0.376	0.458	2.08874e-22
Gm13561	2.68943e-26	0.730994	0.213	0.13	2.13676e-22
Dyrk2	2.7422e-26	0.706965	0.214	0.131	2.17868e-22
Pdgfrl	2.95361e-26	0.816829	0.291	0.204	2.34664e-22
Il31ra	3.09654e-26	-1.27066	0.051	0.108	2.4602e-22
Lap3	3.22305e-26	0.474811	0.434	0.333	2.56072e-22
Gm33543	3.26602e-26	0.649242	0.262	0.173	2.59485e-22
Chd7	3.55871e-26	-0.396922	0.624	0.683	2.82739e-22
Evi5	3.57491e-26	0.217043	0.931	0.909	2.84027e-22
Smad2	3.59147e-26	0.63627	0.272	0.183	2.85343e-22
Osbpl3	4.23381e-26	1.5515	0.08	0.03	3.36376e-22
Suco	4.45459e-26	0.653414	0.287	0.196	3.53917e-22
Trim28	4.87928e-26	0.463103	0.476	0.38	3.87659e-22
Raph1	5.62392e-26	0.227491	0.908	0.866	4.46821e-22
Selenbp1	5.74386e-26	0.558623	0.302	0.208	4.5635e-22
Abhd15	5.81675e-26	0.964412	0.146	0.077	4.6214e-22
Yars	6.19386e-26	-0.628587	0.222	0.315	4.92103e-22
Dapk2	6.21068e-26	0.61893	0.265	0.175	4.93438e-22
Btbd9	7.47668e-26	-0.398267	0.591	0.665	5.94023e-22
Slc2a2	7.91411e-26	0.23841	0.909	0.852	6.28776e-22
Tubb2a	8.4438e-26	0.745115	0.261	0.174	6.7086e-22
Pon3	8.73669e-26	0.520618	0.328	0.231	6.9413e-22
Mpnd	8.99246e-26	-0.834066	0.123	0.201	7.14451e-22
Sp4	1.04511e-25	1.14714	0.098	0.042	8.30336e-22
Fam214b	1.1404e-25	0.995025	0.122	0.059	9.06048e-22
Acss2	1.20818e-25	0.402819	0.576	0.477	9.59903e-22
Susd6	1.25432e-25	-0.344807	0.671	0.728	9.96556e-22
Shtn1	1.32566e-25	-0.424112	0.553	0.623	1.05324e-21
Zcchc2	1.41886e-25	0.460765	0.389	0.288	1.12728e-21
Rcl1	1.4465e-25	0.351814	0.657	0.569	1.14924e-21
Pde9a	1.48759e-25	0.69805	0.241	0.156	1.18189e-21
Angptl3	1.60184e-25	0.587762	0.382	0.285	1.27266e-21
Enpep	1.64547e-25	0.775748	0.235	0.153	1.30733e-21
Fgl1	1.76186e-25	-0.914395	0.121	0.197	1.3998e-21
AC135859.1	1.78571e-25	0.729503	0.226	0.145	1.41875e-21
Maml3	1.94777e-25	-0.599059	0.343	0.43	1.5475e-21
Cyth1	2.00754e-25	0.376172	0.582	0.49	1.59499e-21
Sap130	2.13874e-25	0.503702	0.402	0.309	1.69923e-21
Srd5a1	2.17176e-25	0.527959	0.307	0.212	1.72546e-21
Gstt1	2.21013e-25	0.923196	0.137	0.071	1.75595e-21
Tcf7l1	2.21424e-25	-0.517347	0.396	0.483	1.75922e-21
Utrn	2.22753e-25	0.280331	0.8	0.732	1.76977e-21
Cep152	2.24955e-25	1.03597	0.128	0.065	1.78727e-21
Sorbs1	2.66049e-25	0.24033	0.816	0.745	2.11376e-21
Dusp6	2.78288e-25	0.764401	0.179	0.103	2.211e-21
Fnbp1l	2.83484e-25	0.541861	0.376	0.28	2.25228e-21
Lrrc8d	2.96093e-25	0.428337	0.463	0.369	2.35246e-21
Ing4	3.14665e-25	0.566362	0.32	0.226	2.50001e-21
Nktr	3.24398e-25	0.251565	0.837	0.773	2.57734e-21
Azin1	3.76884e-25	0.448083	0.535	0.442	2.99434e-21
Trafd1	4.40187e-25	0.505732	0.312	0.215	3.49729e-21
Pten	4.42995e-25	0.281347	0.796	0.724	3.51959e-21
Celf1	4.57277e-25	-0.220678	0.853	0.877	3.63307e-21
Insr	4.87882e-25	0.227359	0.848	0.786	3.87622e-21
Apoh	5.47817e-25	0.418175	0.557	0.464	4.35241e-21
Tsc1	5.7061e-25	0.515608	0.36	0.265	4.53349e-21
Rhod	5.8487e-25	0.760053	0.2	0.122	4.64679e-21
Eif4g3	6.50928e-25	-0.355377	0.607	0.674	5.17163e-21
Med27	6.64006e-25	-0.650861	0.261	0.348	5.27553e-21
Cyld	7.39264e-25	0.497979	0.358	0.262	5.87345e-21
Pdia6	9.1523e-25	0.488162	0.429	0.332	7.2715e-21
Dlat	9.93985e-25	0.609123	0.328	0.239	7.89721e-21
Ces1c	1.1378e-24	0.296088	0.635	0.538	9.03981e-21
Cyp4a12a	1.20225e-24	-0.543395	0.243	0.338	9.55189e-21
Ei24	1.4148e-24	0.437536	0.462	0.366	1.12405e-20
Sgk1	1.48623e-24	1.1172	0.102	0.046	1.18081e-20
C330002G04Rik	1.55897e-24	-0.796274	0.183	0.264	1.23861e-20
Ftcd	1.63437e-24	-0.275542	0.789	0.832	1.29851e-20
Ces1b	1.77457e-24	0.696332	0.208	0.129	1.4099e-20
Iqgap2	1.78006e-24	-0.164944	0.974	0.974	1.41426e-20
Aldh2	1.81439e-24	0.305979	0.629	0.525	1.44153e-20
Kansl1l	2.31872e-24	0.298251	0.684	0.591	1.84222e-20
Gne	2.66062e-24	0.330331	0.641	0.551	2.11386e-20
Pik3c2a	2.72113e-24	-0.334207	0.703	0.751	2.16194e-20
Ugt1a6a	2.76141e-24	0.654546	0.249	0.164	2.19394e-20
Rffl	2.79674e-24	0.343239	0.558	0.461	2.22201e-20
Prodh	2.8367e-24	0.442042	0.347	0.249	2.25376e-20
Khnyn	2.9046e-24	0.5428	0.293	0.203	2.30771e-20
S100a10	2.95291e-24	0.827179	0.184	0.11	2.34608e-20
Gstz1	3.02641e-24	0.304291	0.68	0.592	2.40448e-20
Rtn4rl1	3.23957e-24	0.617353	0.256	0.171	2.57384e-20
Chchd2	3.31189e-24	0.635717	0.276	0.19	2.63129e-20
Btbd8	3.5238e-24	1.21241	0.105	0.049	2.79966e-20
Nrp2	3.79107e-24	1.26362	0.105	0.049	3.012e-20
Hdac11	3.79215e-24	0.916761	0.15	0.083	3.01286e-20
Ggnbp2	4.18975e-24	0.235311	0.814	0.754	3.32875e-20
Tmem183a	4.58975e-24	0.479321	0.368	0.273	3.64656e-20
Elmo1	4.80808e-24	-0.879993	0.148	0.224	3.82002e-20
Tenm3	5.20775e-24	0.678934	0.327	0.24	4.13756e-20
Megf9	5.50704e-24	-0.527476	0.356	0.444	4.37535e-20
Erg28	6.07439e-24	0.738751	0.212	0.133	4.82611e-20
Kyat3	6.13817e-24	0.298408	0.827	0.77	4.87678e-20
Hsd3b3	7.16131e-24	-0.360431	0.701	0.748	5.68966e-20
Arfgap2	7.17673e-24	-0.564145	0.345	0.434	5.70191e-20
Dnajc11	7.35222e-24	-0.556847	0.308	0.394	5.84134e-20
Ces1d	8.12562e-24	0.583944	0.279	0.19	6.45581e-20
2010315B03Rik	8.27353e-24	0.666322	0.238	0.157	6.57332e-20
Jade1	8.37185e-24	0.510433	0.331	0.24	6.65144e-20
Wdfy3	8.38059e-24	0.292819	0.717	0.641	6.65838e-20
Cyp2c29	8.51205e-24	0.394806	0.421	0.313	6.76282e-20
Tacc1	9.19102e-24	-0.514114	0.472	0.541	7.30227e-20
Stk19	1.04667e-23	-0.713589	0.199	0.283	8.31582e-20
Macf1	1.05812e-23	-0.233681	0.858	0.882	8.40678e-20
Pnrc1	1.35318e-23	0.611772	0.257	0.172	1.0751e-19
Dcun1d3	1.58484e-23	-0.648206	0.218	0.303	1.25916e-19
St3gal5	1.91857e-23	-0.286763	0.81	0.827	1.5243e-19
Tjp2	2.29919e-23	0.433338	0.415	0.318	1.8267e-19
Hip1r	2.67736e-23	-0.919626	0.138	0.21	2.12716e-19
Rasa3	2.72107e-23	1.75181	0.048	0.012	2.16189e-19
Tpt1	2.98297e-23	0.556053	0.357	0.266	2.36997e-19
Nr1d2	3.18636e-23	0.364521	0.559	0.466	2.53156e-19
Cfi	3.33083e-23	0.463572	0.386	0.29	2.64635e-19
Prpf6	3.37661e-23	-0.504688	0.368	0.455	2.68272e-19
Pam	4.40653e-23	-1.08244	0.061	0.119	3.50099e-19
Cenpv	4.50717e-23	0.528617	0.323	0.236	3.58094e-19
Pcsk6	4.68959e-23	0.321068	0.606	0.514	3.72588e-19
Cep57l1	4.74167e-23	0.677389	0.234	0.155	3.76725e-19
Sqor	5.07192e-23	0.634816	0.227	0.148	4.02964e-19
Rdh9	5.28545e-23	0.80487	0.166	0.097	4.19929e-19
Exph5	8.53249e-23	0.467988	0.367	0.274	6.77907e-19
Pts	9.27931e-23	0.684157	0.207	0.132	7.37242e-19
Foxp1	9.64383e-23	-0.179833	0.966	0.976	7.66203e-19
Ebpl	9.94637e-23	0.693009	0.185	0.112	7.90239e-19
Tprkb	1.01096e-22	0.425472	0.434	0.341	8.03209e-19
Etl4	1.01918e-22	0.372838	0.501	0.404	8.09738e-19
Adra1a	1.04512e-22	0.805067	0.156	0.089	8.30347e-19
Lrpprc	1.1757e-22	-0.290658	0.706	0.751	9.34096e-19
Itgb5	1.30087e-22	0.550537	0.283	0.199	1.03354e-18
Nat8f1	1.35221e-22	0.539792	0.317	0.228	1.07433e-18
Alg6	2.02714e-22	0.907528	0.129	0.068	1.61057e-18
9030616G12Rik	2.02982e-22	0.589867	0.45	0.363	1.61269e-18
Gm15764	2.27959e-22	0.572352	0.262	0.18	1.81113e-18
Aacs	2.28007e-22	-0.400344	0.344	0.437	1.81151e-18
Prickle1	2.3786e-22	1.12891	0.104	0.051	1.8898e-18
Slc6a6	2.4429e-22	0.431447	0.406	0.314	1.94088e-18
Scap	2.63826e-22	0.481489	0.38	0.291	2.0961e-18
Tcp11l2	2.66035e-22	0.623017	0.267	0.186	2.11365e-18
Tnfaip8l1	2.8986e-22	0.596967	0.246	0.165	2.30294e-18
Gpr146	2.94359e-22	0.90087	0.139	0.077	2.33868e-18
Pde4d	3.01526e-22	0.355218	0.743	0.695	2.39563e-18
Adtrp	3.20763e-22	-0.371351	0.576	0.64	2.54846e-18
Cyp2c50	3.5969e-22	0.664258	0.227	0.148	2.85774e-18
Mipol1	3.67618e-22	0.481256	0.398	0.311	2.92072e-18
Pltp	3.75562e-22	1.61923	0.054	0.016	2.98384e-18
Masp1	3.8474e-22	0.322763	0.564	0.471	3.05676e-18
Acadm	4.65072e-22	0.355621	0.555	0.467	3.695e-18
H3f3b	5.0843e-22	0.523072	0.459	0.368	4.03947e-18
Ttc7	5.16483e-22	0.473544	0.356	0.265	4.10346e-18
N4bp2	5.32561e-22	0.510478	0.354	0.265	4.2312e-18
Tmem38b	6.02204e-22	0.568659	0.269	0.187	4.78451e-18
Camk2n1	6.02874e-22	0.587058	0.22	0.143	4.78984e-18
Usp9x	6.71799e-22	0.264307	0.766	0.7	5.33744e-18
Braf	7.44572e-22	-0.371316	0.482	0.567	5.91563e-18
Hadhb	7.50376e-22	-0.504346	0.321	0.406	5.96174e-18
Il1rap	7.63782e-22	-0.280991	0.89	0.881	6.06825e-18
Stt3b	7.93336e-22	0.33861	0.516	0.417	6.30306e-18
Mir22hg	9.03136e-22	0.312377	0.589	0.497	7.17542e-18
Plppr1	9.24314e-22	1.04228	0.109	0.055	7.34367e-18
Inpp4a	9.36599e-22	0.406484	0.494	0.407	7.44128e-18
Nrf1	9.48686e-22	-0.435261	0.44	0.518	7.53731e-18
Ppp4r3a	9.70353e-22	-0.355168	0.617	0.673	7.70945e-18
Lgals8	1.02577e-21	0.327169	0.606	0.525	8.14978e-18
Ddhd2	1.08524e-21	-0.429225	0.455	0.531	8.62221e-18
Camk2d	1.24903e-21	-0.435572	0.391	0.478	9.92354e-18
Cyp2c54	1.35485e-21	0.571272	0.243	0.164	1.07643e-17
Soat2	1.58712e-21	0.53498	0.299	0.214	1.26097e-17
Tnfrsf1b	1.67984e-21	0.536631	0.316	0.232	1.33463e-17
Bcl9	1.78914e-21	0.733877	0.154	0.089	1.42147e-17
Cmah	1.84239e-21	-0.234365	0.93	0.933	1.46378e-17
Cib3	2.03224e-21	0.833909	0.178	0.11	1.61462e-17
Adh1	2.47442e-21	0.214518	0.638	0.525	1.96592e-17
Ptp4a1	2.56194e-21	0.868691	0.139	0.077	2.03546e-17
Gm48633	2.81085e-21	0.366297	0.573	0.49	2.23322e-17
Luc7l2	2.81219e-21	0.126427	0.988	0.977	2.23428e-17
Txndc5	3.05888e-21	0.466676	0.361	0.274	2.43028e-17
Ncor2	3.06468e-21	-0.66319	0.19	0.266	2.43489e-17
BC005561	3.11905e-21	-0.455904	0.485	0.552	2.47809e-17
Aqp9	3.24955e-21	0.302754	0.518	0.415	2.58177e-17
Gm3734	3.40716e-21	0.773067	0.179	0.11	2.70699e-17
Ski	4.0836e-21	0.635372	0.232	0.157	3.24442e-17
Prkn	4.43197e-21	-0.234812	0.827	0.856	3.5212e-17
B430010I23Rik	4.60704e-21	0.420379	0.428	0.336	3.66029e-17
Slc25a47	4.70029e-21	-0.241328	0.899	0.907	3.73438e-17
Cntrl	4.91724e-21	0.439985	0.348	0.26	3.90674e-17
Rmnd5a	5.29351e-21	0.279745	0.69	0.613	4.20569e-17
Ttc36	5.65264e-21	0.541428	0.305	0.223	4.49102e-17
Os9	5.87184e-21	0.505389	0.318	0.235	4.66517e-17
Mospd2	6.01665e-21	0.735369	0.194	0.124	4.78023e-17
Prkcz	6.09074e-21	0.612676	0.242	0.165	4.8391e-17
Mocs2	6.55404e-21	0.438168	0.41	0.322	5.20719e-17
Zranb1	7.53689e-21	-0.252185	0.788	0.816	5.98806e-17
Slc22a15	7.62597e-21	0.893157	0.121	0.064	6.05884e-17
Pja2	7.71121e-21	0.403198	0.401	0.308	6.12656e-17
Eci2	8.60773e-21	-0.270266	0.783	0.827	6.83884e-17
Zmiz1	9.30016e-21	0.302597	0.618	0.53	7.38898e-17
Sec16b	1.17027e-20	0.280178	0.704	0.628	9.29779e-17
Cds2	1.23825e-20	0.553607	0.29	0.211	9.83787e-17
Ahr	1.26921e-20	0.413628	0.323	0.236	1.00839e-16
Bcl2l11	1.33002e-20	1.45225	0.066	0.026	1.0567e-16
Usp34	1.50448e-20	-0.201228	0.867	0.883	1.19531e-16
Serpinf1	1.62446e-20	0.661963	0.227	0.153	1.29064e-16
Msh2	1.64476e-20	1.39602	0.069	0.027	1.30676e-16
Mdh1	1.67895e-20	0.418035	0.427	0.339	1.33393e-16
Lmbrd2	1.79525e-20	0.410557	0.457	0.371	1.42633e-16
Nab1	1.97087e-20	0.509973	0.304	0.222	1.56586e-16
Inhbc	2.02576e-20	-0.695873	0.13	0.199	1.60947e-16
Smoc1	2.05242e-20	-0.343144	0.818	0.826	1.63065e-16
Gcn1	2.05251e-20	-0.640095	0.217	0.293	1.63072e-16
Anxa5	2.13781e-20	1.06716	0.089	0.041	1.69849e-16
Hnrnpa3	2.20174e-20	0.255761	0.761	0.687	1.74928e-16
Mif	2.8944e-20	1.0113	0.111	0.058	2.2996e-16
Pbld1	2.98133e-20	0.201691	0.84	0.769	2.36866e-16
Sash1	3.05443e-20	0.300153	0.552	0.457	2.42674e-16
Tgif1	3.25803e-20	0.669047	0.215	0.144	2.58851e-16
1810008I18Rik	3.49449e-20	0.645131	0.221	0.148	2.77638e-16
Acad10	3.64695e-20	0.644184	0.182	0.113	2.8975e-16
Ankrd28	3.89721e-20	0.344622	0.571	0.492	3.09634e-16
Invs	4.15805e-20	0.530974	0.307	0.226	3.30357e-16
Gclc	4.60769e-20	0.24195	0.78	0.719	3.66081e-16
Gpi1	4.68832e-20	-0.476385	0.352	0.43	3.72487e-16
Gm34868	4.75664e-20	0.760891	0.169	0.104	3.77915e-16
Ssu72	4.97644e-20	-0.498533	0.243	0.324	3.95378e-16
Hibch	5.03297e-20	0.38796	0.404	0.316	3.9987e-16
Rtn4	5.317e-20	0.886509	0.171	0.107	4.22435e-16
Zfp945	5.52308e-20	0.65464	0.195	0.127	4.38809e-16
Ube2k	5.80817e-20	-0.259515	0.738	0.777	4.61459e-16
Chchd3	6.79984e-20	-0.227958	0.854	0.868	5.40247e-16
Nolc1	7.55137e-20	-0.803113	0.102	0.165	5.99956e-16
Edem1	7.87016e-20	0.323888	0.57	0.485	6.25284e-16
Smad7	8.79912e-20	0.729561	0.209	0.139	6.9909e-16
Gm12940	1.03104e-19	-0.746709	0.117	0.182	8.1916e-16
Hint2	1.03208e-19	0.681162	0.171	0.106	8.19985e-16
Narf	1.05036e-19	0.641625	0.224	0.151	8.34508e-16
Arl5b	1.10419e-19	0.462036	0.341	0.259	8.77277e-16
Stau2	1.107e-19	-0.471716	0.353	0.431	8.79512e-16
Blm	1.13998e-19	0.72888	0.134	0.076	9.05711e-16
Rwdd3	1.23461e-19	0.841949	0.141	0.082	9.80895e-16
Hs3st3b1	1.25306e-19	0.395646	0.407	0.322	9.95558e-16
Mrpl38	1.35926e-19	-0.801342	0.12	0.186	1.07993e-15
Slc25a33	1.3731e-19	0.589465	0.227	0.154	1.09092e-15
Gigyf2	1.37687e-19	-0.217747	0.844	0.854	1.09393e-15
Rdx	1.41206e-19	0.314855	0.668	0.595	1.12189e-15
Lpp	1.53264e-19	-0.243986	0.814	0.835	1.21768e-15
Eif4a1	1.60574e-19	-0.563212	0.304	0.382	1.27576e-15
Tox	1.70254e-19	0.349618	0.367	0.273	1.35267e-15
Rassf3	1.72225e-19	0.239603	0.668	0.571	1.36833e-15
Scaper	2.0056e-19	-0.479551	0.306	0.39	1.59345e-15
Gm31356	2.01317e-19	0.353798	0.526	0.432	1.59946e-15
Iah1	2.01404e-19	0.529335	0.262	0.185	1.60015e-15
Tmem241	2.07246e-19	0.716385	0.194	0.127	1.64657e-15
Tm4sf4	2.10875e-19	0.580148	0.353	0.275	1.6754e-15
Lrif1	2.15322e-19	0.680438	0.176	0.111	1.71073e-15
Polr1a	2.49589e-19	-0.599541	0.183	0.258	1.98299e-15
Mup10	2.56322e-19	-0.571851	0.174	0.248	2.03648e-15
Slc39a8	2.87518e-19	0.806567	0.151	0.091	2.28433e-15
Ptk2b	3.07574e-19	0.401375	0.348	0.263	2.44367e-15
Nln	3.25895e-19	0.733693	0.175	0.111	2.58923e-15
Wfdc21	3.83908e-19	0.580017	0.284	0.207	3.05015e-15
Hltf	5.06878e-19	0.627407	0.203	0.135	4.02715e-15
Npas2	5.21982e-19	1.21077	0.075	0.033	4.14714e-15
Plpbp	5.2867e-19	0.499366	0.273	0.196	4.20028e-15
Lpgat1	5.29881e-19	0.192992	0.686	0.585	4.2099e-15
Sesn1	5.30778e-19	0.435892	0.334	0.25	4.21703e-15
Cnpy3	5.33381e-19	0.699765	0.188	0.122	4.23771e-15
Rnase4	5.39913e-19	0.588487	0.342	0.266	4.28961e-15
Ncam2	5.44184e-19	-0.33705	0.5	0.592	4.32354e-15
Cbx4	5.66735e-19	0.837956	0.123	0.068	4.50271e-15
Zfp809	6.0452e-19	-0.307577	0.535	0.602	4.80291e-15
Insyn2a	6.30829e-19	0.828084	0.175	0.113	5.01194e-15
Setx	6.32885e-19	0.524775	0.278	0.201	5.02827e-15
B3galt1	6.91208e-19	-1.01882	0.736	0.711	5.49164e-15
Gramd1c	7.99331e-19	-0.268488	0.626	0.687	6.35068e-15
Tmem258	8.91512e-19	0.798786	0.149	0.09	7.08306e-15
Tcf4	9.16701e-19	-0.343456	0.541	0.614	7.28319e-15
Eef1a1	9.71009e-19	0.353312	0.621	0.544	7.71466e-15
Gm10069	1.02431e-18	0.296151	0.506	0.416	8.13817e-15
Kat2b	1.04292e-18	0.214752	0.762	0.697	8.28601e-15
Arhgap35	1.05865e-18	-0.405379	0.491	0.554	8.41094e-15
Pou2f1	1.07142e-18	-0.529514	0.276	0.353	8.51246e-15
Ptpn12	1.24421e-18	0.35294	0.454	0.367	9.88526e-15
Abcg5	1.30957e-18	0.512691	0.3	0.224	1.04046e-14
Cept1	1.3946e-18	0.270773	0.653	0.571	1.10801e-14
Malt1	1.41532e-18	0.582291	0.228	0.157	1.12447e-14
C4bp	1.4531e-18	-0.27511	0.75	0.792	1.15449e-14
Smg1	1.59043e-18	0.221395	0.764	0.711	1.2636e-14
Sclt1	1.72392e-18	0.527192	0.256	0.182	1.36966e-14
Prkacb	1.78879e-18	0.447086	0.318	0.238	1.4212e-14
Ctsc	1.84809e-18	0.685278	0.194	0.128	1.46831e-14
Enpp1	1.88777e-18	0.646627	0.156	0.095	1.49983e-14
4732465J04Rik	1.89074e-18	0.252726	0.636	0.552	1.5022e-14
Nfat5	2.11539e-18	-0.256216	0.672	0.729	1.68067e-14
Hspa8	2.11602e-18	-0.46053	0.32	0.397	1.68118e-14
Dmac2	2.39581e-18	0.554033	0.219	0.149	1.90347e-14
Sphk2	2.80483e-18	0.676819	0.16	0.099	2.22844e-14
Srgap2	2.96984e-18	0.31194	0.443	0.352	2.35953e-14
Hnrnpl	2.98922e-18	-0.484114	0.284	0.36	2.37494e-14
Sorbs3	3.06018e-18	0.680713	0.155	0.096	2.43131e-14
Nde1	3.07614e-18	0.905148	0.114	0.063	2.44399e-14
Hsd17b4	3.07714e-18	-0.253437	0.719	0.755	2.44479e-14
Atg3	3.16668e-18	0.322684	0.491	0.406	2.51593e-14
Ogt	3.20125e-18	0.241347	0.72	0.654	2.54339e-14
Safb2	3.48139e-18	-0.390424	0.422	0.494	2.76597e-14
Ubac2	3.52724e-18	-0.418629	0.385	0.46	2.80239e-14
Xpo1	3.62012e-18	0.466917	0.276	0.2	2.87619e-14
Gm49668	3.81845e-18	0.696454	0.157	0.098	3.03376e-14
Rab11fip2	3.85718e-18	0.766269	0.15	0.092	3.06453e-14
Atp7b	3.89818e-18	0.576899	0.217	0.149	3.0971e-14
Oplah	4.14691e-18	-0.759568	0.116	0.178	3.29472e-14
H2-Q10	4.25508e-18	-0.193625	0.955	0.954	3.38066e-14
Trmt9b	4.50044e-18	0.724738	0.148	0.091	3.5756e-14
Nlk	4.53172e-18	-0.372912	0.456	0.53	3.60045e-14
Aspdh	4.59121e-18	-0.528458	0.25	0.327	3.64772e-14
Zfp292	4.82355e-18	0.268653	0.557	0.472	3.83231e-14
Lsr	5.19202e-18	-0.514712	0.302	0.377	4.12506e-14
Chd1	5.71992e-18	0.321215	0.524	0.442	4.54447e-14
Tpmt	6.38943e-18	0.543936	0.265	0.192	5.0764e-14
Tbc1d16	7.06373e-18	0.464275	0.247	0.174	5.61213e-14
Maob	7.50471e-18	0.234003	0.597	0.5	5.96249e-14
Cda	7.6739e-18	0.603285	0.178	0.116	6.09692e-14
Chd3	8.07052e-18	-0.382424	0.389	0.471	6.41203e-14
Mknk2	8.19445e-18	0.453811	0.295	0.216	6.51049e-14
Cry1	8.2199e-18	0.615982	0.169	0.108	6.53071e-14
Prdx4	8.23356e-18	0.968113	0.111	0.061	6.54157e-14
Srsf2	8.37503e-18	0.206256	0.851	0.789	6.65396e-14
Chrm3	8.48771e-18	-0.302423	0.341	0.435	6.74348e-14
R3hdm1	9.85698e-18	-0.248717	0.764	0.787	7.83137e-14
Avl9	1.04273e-17	0.46511	0.367	0.291	8.28449e-14
Tmem256	1.06325e-17	0.766178	0.117	0.066	8.4475e-14
Pfkfb3	1.14034e-17	-0.994535	0.122	0.18	9.06003e-14
Gm15756	1.14483e-17	0.668521	0.16	0.1	9.09568e-14
Bmp1	1.16122e-17	-0.345822	0.571	0.63	9.22588e-14
Tbc1d30	1.20084e-17	0.701526	0.132	0.077	9.54067e-14
Hnrnpdl	1.30514e-17	0.309861	0.525	0.44	1.03693e-13
Iyd	1.32093e-17	0.804713	0.141	0.086	1.04948e-13
Xylb	1.3318e-17	-0.288262	0.683	0.72	1.05812e-13
Myo5b	1.36308e-17	-0.434353	0.409	0.48	1.08297e-13
Slc4a4	1.36726e-17	0.132228	0.744	0.655	1.08629e-13
Gm49980	1.40389e-17	-0.266014	0.663	0.712	1.11539e-13
Atm	1.49031e-17	0.55956	0.222	0.154	1.18405e-13
Ugcg	1.53078e-17	0.530565	0.253	0.182	1.2162e-13
Gpr39	1.59537e-17	-0.639451	0.187	0.256	1.26752e-13
Aldh9a1	1.72697e-17	0.552145	0.256	0.186	1.37207e-13
Bet1	1.73451e-17	0.512138	0.299	0.225	1.37806e-13
Jun	1.73974e-17	-0.61852	0.098	0.155	1.38222e-13
Kat6b	2.02278e-17	0.260257	0.635	0.555	1.6071e-13
Top2b	2.09397e-17	0.338562	0.494	0.414	1.66366e-13
Cgn	2.30375e-17	0.434173	0.276	0.2	1.83033e-13
Cars2	2.30385e-17	0.713771	0.15	0.093	1.83041e-13
Anxa6	2.32322e-17	0.506766	0.195	0.13	1.8458e-13
Sdhb	2.43344e-17	0.536253	0.248	0.178	1.93337e-13
Tc2n	2.55463e-17	0.944476	0.103	0.056	2.02966e-13
Kank1	2.61382e-17	0.400097	0.384	0.305	2.07668e-13
Gm15261	2.70228e-17	0.640585	0.173	0.112	2.14696e-13
Gm30262	2.71753e-17	-0.65439	0.165	0.231	2.15908e-13
Rdh16f2	2.94592e-17	0.583928	0.228	0.161	2.34053e-13
Nr1d1	3.04333e-17	0.534661	0.232	0.163	2.41792e-13
Sult1d1	3.28279e-17	0.551891	0.231	0.162	2.60818e-13
Golim4	3.34955e-17	0.290436	0.54	0.463	2.66121e-13
Atp2b1	3.442e-17	0.414177	0.398	0.318	2.73467e-13
Cobll1	3.4872e-17	0.12809	0.805	0.718	2.77058e-13
F13b	3.628e-17	0.442832	0.329	0.253	2.88245e-13
N4bp2l1	3.88823e-17	0.305717	0.553	0.478	3.0892e-13
Tnrc6c	4.13838e-17	0.27865	0.611	0.533	3.28794e-13
Mertk	4.33395e-17	0.441721	0.272	0.197	3.44333e-13
Adh4	4.36861e-17	0.468406	0.29	0.216	3.47086e-13
Tmprss6	4.42276e-17	0.288197	0.514	0.432	3.51388e-13
Slc35e2	4.51129e-17	0.24477	0.595	0.516	3.58422e-13
Rab1a	4.52501e-17	-0.403356	0.424	0.489	3.59512e-13
Wbp1l	4.62053e-17	-0.24304	0.776	0.802	3.67101e-13
Mctp2	4.88231e-17	-0.323802	0.548	0.609	3.87899e-13
Rbp4	5.09891e-17	0.189907	0.952	0.917	4.05109e-13
Gkap1	5.48624e-17	0.61334	0.196	0.132	4.35882e-13
Ipmk	5.70539e-17	0.506458	0.316	0.241	4.53293e-13
Mcc	6.10891e-17	0.253616	0.666	0.593	4.85353e-13
Jak1	6.35166e-17	-0.388036	0.589	0.636	5.0464e-13
Itga1	6.64825e-17	0.405676	0.363	0.284	5.28204e-13
Cd59a	6.84377e-17	0.804632	0.131	0.079	5.43737e-13
AW549877	7.17452e-17	0.623015	0.188	0.126	5.70015e-13
Cep85l	7.3478e-17	-0.197514	0.883	0.893	5.83783e-13
Il6st	7.59638e-17	0.394992	0.374	0.296	6.03532e-13
Hjv	7.86584e-17	0.454426	0.269	0.196	6.24941e-13
C2cd5	8.22351e-17	0.497663	0.213	0.147	6.53358e-13
Aars	9.02637e-17	-0.507578	0.288	0.36	7.17145e-13
Ppib	9.2276e-17	0.437695	0.334	0.258	7.33132e-13
Rnf19a	1.03691e-16	-0.396317	0.456	0.522	8.23828e-13
Myo1b	1.11854e-16	-0.212534	0.884	0.89	8.88677e-13
Cnot4	1.16449e-16	-0.25847	0.698	0.747	9.25184e-13
Myo6	1.16579e-16	-0.243088	0.768	0.799	9.26224e-13
Gnpda1	1.19087e-16	0.630826	0.144	0.088	9.4615e-13
Minpp1	1.4264e-16	0.532801	0.257	0.187	1.13328e-12
Thrsp	1.4339e-16	-0.417562	0.655	0.681	1.13923e-12
Ceacam1	1.46564e-16	0.528499	0.247	0.179	1.16445e-12
Fkbp5	1.55655e-16	-0.399492	0.493	0.547	1.23668e-12
Bmp2k	1.5589e-16	0.594348	0.171	0.112	1.23854e-12
Gm15614	1.68629e-16	0.378922	0.297	0.221	1.33976e-12
Rad54l2	1.81681e-16	-0.265333	0.655	0.7	1.44345e-12
Vps26c	2.13405e-16	0.74785	0.107	0.059	1.6955e-12
Rassf5	2.15542e-16	0.766062	0.118	0.069	1.71248e-12
Igfbp4	2.28117e-16	0.193558	0.774	0.703	1.81239e-12
Kansl1	2.32844e-16	-0.178516	0.878	0.899	1.84994e-12
5031425E22Rik	2.43881e-16	-0.288976	0.654	0.692	1.93763e-12
Actb	2.57771e-16	-0.49653	0.215	0.284	2.04799e-12
Rhpn2	2.58642e-16	0.567406	0.187	0.125	2.05491e-12
2010-09-01	2.64154e-16	0.596957	0.182	0.121	2.0987e-12
Slc7a2	2.66367e-16	0.109063	0.985	0.964	2.11628e-12
Tmem245	2.82466e-16	0.277404	0.566	0.484	2.24419e-12
Slc18b1	2.82947e-16	0.838195	0.094	0.05	2.24802e-12
Cyp2c38	2.87897e-16	0.506441	0.258	0.189	2.28734e-12
Mycbp2	2.91914e-16	-0.292505	0.605	0.657	2.31925e-12
Rmdn1	2.92567e-16	0.262588	0.603	0.533	2.32445e-12
Shpk	3.03186e-16	0.503095	0.271	0.201	2.40881e-12
Zfp871	3.21789e-16	0.250508	0.635	0.556	2.55662e-12
Cacul1	3.34062e-16	-0.313308	0.566	0.613	2.65412e-12
Pxdc1	3.37298e-16	0.598286	0.221	0.157	2.67984e-12
Ddx21	3.37733e-16	-0.622354	0.115	0.174	2.68329e-12
Arhgap26	3.45492e-16	-0.369701	0.357	0.434	2.74494e-12
Pnpla8	3.49291e-16	0.297688	0.572	0.505	2.77512e-12
Larp4b	3.55596e-16	-0.276273	0.723	0.756	2.82521e-12
Tom1l1	3.88018e-16	0.448052	0.291	0.219	3.0828e-12
Tjp1	3.97422e-16	0.306676	0.466	0.388	3.15752e-12
Chchd10	3.97479e-16	0.643869	0.211	0.147	3.15797e-12
Abcd4	4.165e-16	0.712432	0.142	0.088	3.30909e-12
Wdtc1	4.19311e-16	0.318957	0.474	0.394	3.33143e-12
Med13l	4.33654e-16	-0.324091	0.511	0.575	3.44538e-12
Cpne8	4.38162e-16	-1.15099	0.068	0.114	3.4812e-12
Usp6nl	4.86896e-16	-0.346226	0.552	0.603	3.86839e-12
Plcb1	4.89792e-16	-0.157676	0.951	0.96	3.89139e-12
Slc25a51	5.35047e-16	-0.336981	0.604	0.647	4.25095e-12
Rpa1	5.37941e-16	0.874161	0.109	0.062	4.27394e-12
Pde4b	5.51139e-16	0.501642	0.264	0.195	4.3788e-12
Ralgapa1	5.57479e-16	-0.339628	0.455	0.523	4.42917e-12
Fam126b	5.72232e-16	-0.414345	0.389	0.456	4.54638e-12
Fam222b	5.8593e-16	-0.336714	0.501	0.567	4.65521e-12
Adh5	5.87898e-16	0.560295	0.235	0.17	4.67085e-12
Wdpcp	5.92534e-16	0.669623	0.185	0.125	4.70768e-12
Hsd3b7	5.92895e-16	0.285168	0.641	0.571	4.71055e-12
Actn1	6.11881e-16	0.572912	0.206	0.144	4.86139e-12
Glce	6.17753e-16	0.382448	0.422	0.347	4.90805e-12
Vps4b	6.18003e-16	0.447782	0.314	0.243	4.91003e-12
Ssr4	6.7454e-16	0.470572	0.323	0.251	5.35922e-12
Mgrn1	6.84183e-16	0.337863	0.434	0.357	5.43583e-12
Grpel2	7.15857e-16	0.466639	0.274	0.205	5.68748e-12
Fads6	7.9169e-16	0.396494	0.37	0.3	6.28998e-12
Sesn3	8.51241e-16	0.625919	0.168	0.111	6.76311e-12
Hook2	8.76265e-16	0.569057	0.243	0.178	6.96192e-12
Ankrd13c	8.86795e-16	0.416604	0.602	0.549	7.04559e-12
Prdx2	9.31377e-16	0.833651	0.115	0.068	7.39979e-12
Cars	9.46307e-16	-0.636832	0.133	0.193	7.51841e-12
Gtf2f2	9.55177e-16	-0.468648	0.283	0.354	7.58888e-12
Taf2	9.72427e-16	-0.440565	0.29	0.361	7.72593e-12
Vdac1	1.08422e-15	0.578539	0.231	0.167	8.6141e-12
Pdlim1	1.10877e-15	0.654989	0.149	0.095	8.80921e-12
Lmo7	1.16937e-15	0.41888	0.339	0.268	9.29067e-12
Mttp	1.18665e-15	-0.260431	0.657	0.71	9.4279e-12
Gm15738	1.19387e-15	0.362045	0.348	0.274	9.48526e-12
Lipa	1.20435e-15	0.359442	0.384	0.308	9.56852e-12
Txndc11	1.244e-15	0.235678	0.717	0.641	9.88356e-12
Ccdc58	1.25207e-15	0.303637	0.541	0.463	9.94772e-12
Rhou	1.26461e-15	0.36917	0.389	0.312	1.00474e-11
Cyp2a12	1.26796e-15	-0.513507	0.25	0.319	1.00739e-11
Arid1b	1.27557e-15	-0.237015	0.728	0.765	1.01344e-11
Mon2	1.28696e-15	0.250792	0.63	0.556	1.02249e-11
Tbc1d10a	1.28994e-15	0.896537	0.1	0.056	1.02486e-11
Pex11g	1.29874e-15	0.482347	0.222	0.156	1.03185e-11
Gm26608	1.42514e-15	0.343762	0.377	0.301	1.13227e-11
Gm19522	1.4847e-15	0.61169	0.187	0.128	1.17959e-11
Plbd1	1.54781e-15	0.686302	0.131	0.08	1.22974e-11
Map1lc3b	1.57219e-15	0.488913	0.241	0.176	1.24911e-11
Mup21	1.59022e-15	-0.0936591	0.287	0.204	1.26343e-11
Yes1	1.66248e-15	0.332791	0.463	0.387	1.32084e-11
Hnf4aos	1.69071e-15	0.273191	0.595	0.533	1.34327e-11
Nop56	1.69072e-15	-0.874481	0.073	0.12	1.34328e-11
Gm15883	1.76248e-15	-0.447984	0.404	0.466	1.40029e-11
Flnb	1.78312e-15	-0.279715	0.687	0.721	1.41669e-11
Ift140	1.81115e-15	0.829542	0.099	0.055	1.43896e-11
4932438A13Rik	1.9291e-15	0.213808	0.73	0.656	1.53267e-11
Txnip	1.99587e-15	-0.321321	0.345	0.425	1.58572e-11
Igf1	2.06897e-15	-0.253507	0.822	0.851	1.6438e-11
Zfp652	2.11367e-15	0.313169	0.453	0.376	1.67931e-11
Cnst	2.1553e-15	0.495316	0.218	0.155	1.71239e-11
Plcxd2	2.17119e-15	-0.37528	0.536	0.581	1.72501e-11
Kcnt2	2.23538e-15	-0.516215	0.117	0.176	1.77601e-11
Acp5	2.25477e-15	0.811112	0.106	0.06	1.79141e-11
Syne2	2.26478e-15	0.302063	0.539	0.467	1.79937e-11
Rnf141	2.3841e-15	0.609352	0.21	0.148	1.89417e-11
Micu1	2.56225e-15	-0.553749	0.198	0.263	2.03571e-11
Nrp1	2.6212e-15	0.509903	0.422	0.351	2.08254e-11
Gga3	2.64621e-15	-0.849536	0.069	0.115	2.10242e-11
Rusc2	2.77191e-15	0.460623	0.344	0.273	2.20228e-11
Gbf1	2.828e-15	-0.23978	0.74	0.773	2.24684e-11
Mup7	2.88052e-15	-0.752752	0.09	0.141	2.28857e-11
Erbin	2.88916e-15	0.243323	0.684	0.613	2.29544e-11
Gm28836	2.98023e-15	0.424271	0.198	0.136	2.36779e-11
Cd36	3.00941e-15	0.65192	0.144	0.092	2.39098e-11
Cnksr3	3.13611e-15	0.504416	0.235	0.169	2.49164e-11
Gm42917	3.20542e-15	0.861407	0.104	0.059	2.5467e-11
Nlrp12	3.21976e-15	0.367231	0.429	0.357	2.5581e-11
Ank	3.27613e-15	0.345919	0.444	0.372	2.60288e-11
Nfxl1	3.70723e-15	0.335781	0.386	0.309	2.9454e-11
Tln2	3.75134e-15	-0.718256	0.087	0.137	2.98044e-11
Ptpre	3.80272e-15	1.11132	0.068	0.033	3.02126e-11
Sfi1	4.09254e-15	-0.513657	0.248	0.314	3.25152e-11
Sptssa	4.30032e-15	0.603737	0.162	0.107	3.4166e-11
Abcc6	4.3059e-15	0.184044	0.773	0.715	3.42104e-11
Lman1	4.3648e-15	0.265177	0.573	0.5	3.46783e-11
Pbx1	4.36696e-15	-0.429813	0.409	0.472	3.46955e-11
Mpdz	4.70623e-15	0.556661	0.226	0.164	3.7391e-11
Htt	4.85704e-15	-0.425752	0.3	0.37	3.85892e-11
Acsl3	4.92527e-15	0.419675	0.293	0.223	3.91313e-11
Bcl6	5.57466e-15	0.244616	0.655	0.59	4.42907e-11
Gsap	5.90278e-15	0.356494	0.351	0.278	4.68976e-11
Zscan26	5.90307e-15	0.356257	0.416	0.345	4.68999e-11
Selenok	5.92932e-15	0.560808	0.23	0.167	4.71085e-11
Pinx1	6.08167e-15	-0.815545	0.089	0.138	4.83188e-11
Dcaf11	6.14197e-15	0.255996	0.543	0.467	4.8798e-11
Arih1	6.16783e-15	-0.19729	0.78	0.814	4.90034e-11
Pgm3	6.44954e-15	-0.628911	0.184	0.247	5.12416e-11
Tlcd1	6.5248e-15	0.559594	0.207	0.147	5.18395e-11
Slc25a32	6.73111e-15	0.361506	0.406	0.333	5.34787e-11
Mfsd4b1	6.92896e-15	0.528195	0.158	0.103	5.50506e-11
Top1	6.98311e-15	-0.257786	0.674	0.709	5.54808e-11
4930556N13Rik	7.10166e-15	0.309517	0.454	0.376	5.64227e-11
Fasn	7.31519e-15	-0.293959	0.504	0.57	5.81192e-11
Shfl	7.75627e-15	-0.335427	0.538	0.597	6.16235e-11
Shroom2	8.01274e-15	0.228294	0.515	0.431	6.36612e-11
Hivep2	8.37847e-15	-0.404469	0.461	0.522	6.65669e-11
Mettl7a1	8.59546e-15	0.483258	0.247	0.182	6.8291e-11
Dpy19l4	8.61241e-15	0.529869	0.212	0.15	6.84256e-11
Slc25a3	8.62301e-15	0.2472	0.623	0.551	6.85098e-11
Cutal	9.32378e-15	0.4779	0.232	0.168	7.40774e-11
Tcf12	9.8823e-15	-0.225049	0.76	0.787	7.85149e-11
Hsdl2	1.04327e-14	-0.460487	0.24	0.308	8.28879e-11
Ttc27	1.06599e-14	-0.548844	0.196	0.258	8.4693e-11
Ankrd10	1.06623e-14	0.595837	0.184	0.127	8.47119e-11
Mlec	1.06815e-14	0.521121	0.218	0.158	8.48647e-11
Mpv17l	1.15143e-14	0.623409	0.191	0.134	9.1481e-11
Tfb1m	1.15204e-14	0.724748	0.12	0.073	9.15298e-11
Wwc2	1.28373e-14	-0.440458	0.269	0.338	1.01992e-10
Tbc1d8	1.28825e-14	-0.335928	0.504	0.56	1.02352e-10
Mccc1	1.45177e-14	0.525242	0.198	0.139	1.15343e-10
Ccdc152	1.45182e-14	0.382449	0.406	0.334	1.15347e-10
Mthfs	1.45748e-14	0.394896	0.335	0.265	1.15797e-10
Gm34280	1.54699e-14	0.464477	0.224	0.162	1.22908e-10
Lonp2	1.58286e-14	-0.155307	0.929	0.936	1.25758e-10
Mtx3	1.61072e-14	0.588362	0.163	0.109	1.27972e-10
Serpind1	1.71447e-14	-0.442357	0.249	0.317	1.36215e-10
Ebp	1.97975e-14	0.557839	0.192	0.134	1.57291e-10
Cdkn1b	2.02431e-14	0.645635	0.141	0.09	1.60832e-10
Qsox1	2.07101e-14	-0.438046	0.317	0.385	1.64541e-10
Zdhhc9	2.10705e-14	0.35132	0.361	0.29	1.67405e-10
Acadvl	2.12055e-14	-0.666634	0.128	0.184	1.68478e-10
Atxn2l	2.14883e-14	0.259692	0.457	0.377	1.70725e-10
Heca	2.18197e-14	0.381388	0.395	0.324	1.73358e-10
Cep70	2.18283e-14	0.950733	0.095	0.054	1.73426e-10
Ago4	2.18502e-14	0.621282	0.127	0.079	1.736e-10
Piga	2.19674e-14	0.666738	0.132	0.083	1.74531e-10
Calcoco1	2.21262e-14	0.681405	0.152	0.1	1.75793e-10
Pi4k2b	2.30907e-14	0.46222	0.243	0.179	1.83455e-10
Ppp4r4	2.46492e-14	0.403339	0.254	0.188	1.95838e-10
Sft2d1	2.47651e-14	0.546847	0.192	0.134	1.96758e-10
Cyp26b1	2.65703e-14	-2.52044	0.004	0.021	2.11101e-10
Mga	2.78826e-14	0.299127	0.487	0.415	2.21527e-10
Vps13c	2.80826e-14	0.244589	0.513	0.44	2.23116e-10
Zc3h13	2.91222e-14	-0.412496	0.365	0.431	2.31376e-10
Eif2s3y	2.97754e-14	0.289362	0.392	0.314	2.36566e-10
Ctps2	2.99561e-14	0.806657	0.091	0.05	2.38001e-10
Edem2	3.03213e-14	0.474573	0.207	0.146	2.40902e-10
Tuft1	3.14266e-14	-0.681973	0.148	0.204	2.49684e-10
Plxna2	3.15272e-14	0.450336	0.385	0.323	2.50484e-10
Msra	3.19032e-14	-0.234053	0.748	0.777	2.53471e-10
Gm43305	3.29745e-14	0.451314	0.568	0.51	2.61983e-10
Cfap20	3.47326e-14	0.339713	0.392	0.318	2.75951e-10
Utp20	3.47458e-14	-0.507106	0.202	0.264	2.76055e-10
Htatip2	3.72424e-14	0.557331	0.182	0.126	2.95891e-10
Spag9	3.94255e-14	0.171137	0.864	0.815	3.13235e-10
Mup3	4.02477e-14	0.163847	0.967	0.928	3.19768e-10
Sypl	4.28891e-14	0.536484	0.208	0.15	3.40754e-10
AC149090.1	4.40771e-14	-0.173077	0.887	0.895	3.50192e-10
Tfrc	4.60599e-14	0.510941	0.213	0.153	3.65946e-10
Cnnm2	4.75082e-14	0.51176	0.196	0.138	3.77453e-10
Plscr1	4.85377e-14	0.810837	0.102	0.06	3.85632e-10
Scpep1	4.87127e-14	0.693993	0.114	0.069	3.87023e-10
Ankrd11	5.19262e-14	-0.227764	0.777	0.803	4.12554e-10
Gm49890	5.27941e-14	-0.677238	0.114	0.167	4.19449e-10
Hmgcl	5.32812e-14	0.357413	0.321	0.253	4.23319e-10
Rai1	5.62724e-14	-0.384904	0.333	0.402	4.47084e-10
Crot	6.00714e-14	0.178968	0.805	0.744	4.77268e-10
Parn	6.09839e-14	0.343254	0.371	0.302	4.84517e-10
Pla1a	6.26381e-14	0.61307	0.16	0.108	4.9766e-10
Gfpt1	6.34307e-14	0.389953	0.321	0.252	5.03957e-10
Gm39469	6.76132e-14	0.578949	0.19	0.134	5.37187e-10
Smap2	6.95216e-14	0.351654	0.322	0.254	5.52349e-10
Klf9	7.33007e-14	0.236351	0.616	0.548	5.82374e-10
4930544F09Rik	7.6802e-14	-0.616361	0.113	0.165	6.10192e-10
Clec16a	7.87626e-14	-0.50013	0.241	0.303	6.25769e-10
Nbas	7.89279e-14	0.306495	0.494	0.426	6.27082e-10
Rptor	8.61108e-14	-0.290883	0.533	0.587	6.8415e-10
Ano6	9.41528e-14	0.603054	0.139	0.09	7.48044e-10
Gpr155	9.93728e-14	0.946339	0.073	0.038	7.89517e-10
L2hgdh	9.93826e-14	0.351064	0.41	0.341	7.89595e-10
Zc3h7a	1.0114e-13	0.245299	0.562	0.492	8.03556e-10
Klhl2	1.0423e-13	-0.37968	0.368	0.43	8.28104e-10
Copg2	1.0486e-13	0.37623	0.295	0.227	8.33114e-10
Igf1os	1.08265e-13	0.650137	0.128	0.081	8.60167e-10
Stard13	1.08293e-13	0.144213	0.863	0.82	8.60385e-10
Setd3	1.11532e-13	0.305541	0.413	0.341	8.86124e-10
Rlf	1.13021e-13	-0.265772	0.528	0.594	8.97956e-10
Mroh1	1.15059e-13	0.47742	0.176	0.12	9.1414e-10
Trpm7	1.21808e-13	0.18495	0.792	0.732	9.67766e-10
Zmym6	1.26373e-13	0.640276	0.115	0.07	1.00403e-09
1700028E10Rik	1.26516e-13	-0.414424	0.205	0.268	1.00517e-09
Cask	1.3744e-13	-0.420138	0.346	0.409	1.09196e-09
Uap1	1.37603e-13	0.383616	0.32	0.252	1.09325e-09
Bhlhe40	1.39737e-13	-0.354675	0.525	0.578	1.11021e-09
Peli2	1.63754e-13	0.319914	0.388	0.318	1.30103e-09
1010001N08Rik	1.65533e-13	0.49543	0.21	0.152	1.31516e-09
Sec22a	1.81607e-13	0.387252	0.307	0.239	1.44287e-09
Dst	1.82282e-13	-0.349113	0.398	0.465	1.44823e-09
2610203C22Rik	1.84393e-13	0.789565	0.097	0.056	1.465e-09
Marveld2	1.86991e-13	0.535043	0.172	0.119	1.48564e-09
AU022252	1.97399e-13	0.571754	0.196	0.141	1.56833e-09
Etfdh	2.01309e-13	-0.340393	0.364	0.43	1.5994e-09
Mfsd1	2.0836e-13	0.762744	0.104	0.062	1.65542e-09
Eno1	2.10044e-13	-0.456761	0.186	0.246	1.6688e-09
Fdft1	2.36854e-13	0.507373	0.204	0.146	1.88181e-09
Usp18	2.38364e-13	0.816927	0.089	0.051	1.89381e-09
Cct3	2.38634e-13	-0.604883	0.133	0.187	1.89595e-09
Diaph1	2.43908e-13	0.234168	0.598	0.529	1.93785e-09
Plekha7	2.4816e-13	0.457874	0.235	0.174	1.97163e-09
Tst	2.49818e-13	0.588368	0.144	0.095	1.98481e-09
Sh3bgrl2	2.49826e-13	0.466278	0.194	0.139	1.98487e-09
Smarca2	2.58968e-13	0.177514	0.776	0.717	2.0575e-09
Kmt2d	2.66406e-13	-0.516111	0.202	0.261	2.1166e-09
Tbc1d15	3.32764e-13	0.319836	0.433	0.365	2.64381e-09
Smim14	3.40835e-13	0.244958	0.507	0.433	2.70794e-09
Pex1	3.43004e-13	0.332678	0.365	0.297	2.72517e-09
Nipbl	3.53287e-13	-0.167955	0.841	0.854	2.80687e-09
Npc2	3.5369e-13	0.873324	0.073	0.039	2.81007e-09
Prmt3	3.54531e-13	-0.58837	0.133	0.187	2.81675e-09
Nrn1	3.62088e-13	0.345714	0.245	0.183	2.87679e-09
Clk4	3.63303e-13	0.215767	0.651	0.59	2.88645e-09
Pdia3	3.84321e-13	-0.366779	0.511	0.558	3.05343e-09
Zkscan1	3.85069e-13	0.289895	0.481	0.41	3.05937e-09
Capzb	3.89966e-13	-0.516233	0.196	0.256	3.09828e-09
Ehmt1	3.92845e-13	-0.198779	0.73	0.769	3.12116e-09
Tor1b	3.93013e-13	-0.486689	0.203	0.264	3.12249e-09
Arhgef12	3.94016e-13	0.141577	0.889	0.86	3.13046e-09
Sfxn5	4.03277e-13	0.27895	0.488	0.415	3.20403e-09
Cd1d1	4.17112e-13	0.190168	0.415	0.332	3.31396e-09
Ppp3cc	4.49478e-13	0.658926	0.126	0.08	3.5711e-09
Ddrgk1	4.54862e-13	0.491784	0.197	0.141	3.61388e-09
Fkbp2	4.59306e-13	0.577222	0.138	0.09	3.64919e-09
Ralgps1	4.60582e-13	0.438476	0.211	0.154	3.65932e-09
Gm17178	4.71132e-13	0.468755	0.176	0.122	3.74314e-09
Lmf1	4.81048e-13	0.559158	0.155	0.105	3.82192e-09
Atp13a3	5.04385e-13	0.175684	0.785	0.737	4.00734e-09
Prpf4b	5.14411e-13	0.163249	0.88	0.848	4.087e-09
Mug1	5.20008e-13	0.0600605	0.993	0.986	4.13146e-09
Dock4	5.28446e-13	-0.160117	0.793	0.834	4.1985e-09
Crtc3	5.51712e-13	0.291336	0.423	0.354	4.38335e-09
Rtn3	5.53139e-13	-0.234452	0.681	0.723	4.39469e-09
Ergic1	5.57678e-13	-0.431288	0.302	0.365	4.43075e-09
Hcn3	5.90132e-13	-0.507384	0.171	0.227	4.6886e-09
Cpeb4	5.99318e-13	0.157057	0.808	0.748	4.76158e-09
Angel2	6.14554e-13	0.573882	0.165	0.115	4.88263e-09
Tfpi2	6.14875e-13	0.230268	0.612	0.55	4.88518e-09
Pigr	6.38943e-13	0.509764	0.236	0.177	5.0764e-09
Lrch1	6.49134e-13	0.319992	0.405	0.337	5.15737e-09
Odf2	6.57855e-13	0.478132	0.167	0.115	5.22665e-09
Hpcal1	7.14314e-13	0.706336	0.118	0.074	5.67522e-09
Mical2	7.14928e-13	0.441432	0.253	0.193	5.6801e-09
Gulo	7.29495e-13	0.413886	0.265	0.202	5.79584e-09
Zeb1	7.39787e-13	-0.213031	0.783	0.813	5.87761e-09
Ptma	7.52761e-13	0.438442	0.248	0.188	5.98069e-09
Lrp5	7.76479e-13	0.269445	0.334	0.264	6.16912e-09
Slc10a2	7.82343e-13	0.450602	0.177	0.123	6.21572e-09
Arglu1	8.0737e-13	-0.287481	0.459	0.521	6.41455e-09
Sec24a	8.26196e-13	-0.148709	0.878	0.887	6.56413e-09
Cyp2d22	8.50907e-13	0.236797	0.539	0.47	6.76045e-09
Cd81	8.78399e-13	0.589592	0.173	0.121	6.97888e-09
Masp2	8.95455e-13	-0.275177	0.539	0.591	7.11439e-09
Nr6a1	9.03457e-13	-0.218788	0.777	0.799	7.17797e-09
Sik2	9.32879e-13	0.331649	0.433	0.369	7.41172e-09
Supt20	9.46933e-13	0.333677	0.36	0.294	7.52338e-09
Sub1	1.02837e-12	0.56671	0.138	0.091	8.17039e-09
Inpp5a	1.09154e-12	-0.507676	0.153	0.207	8.67229e-09
Adnp	1.10765e-12	-0.343239	0.43	0.488	8.80028e-09
Zfp512b	1.18027e-12	-0.743563	0.093	0.138	9.37727e-09
Hnf1b	1.18799e-12	0.532554	0.185	0.132	9.43859e-09
Gm15640	1.22801e-12	0.507706	0.17	0.117	9.75655e-09
Ikbke	1.25924e-12	0.470492	0.215	0.158	1.00047e-08
Rabl6	1.26772e-12	-0.432039	0.253	0.315	1.0072e-08
C730002L08Rik	1.2814e-12	0.728229	0.156	0.107	1.01807e-08
Pbx3	1.42587e-12	-0.531358	0.18	0.235	1.13285e-08
Gm11437	1.43866e-12	0.610682	0.141	0.094	1.14301e-08
Irf1	1.50664e-12	0.716541	0.08	0.045	1.19703e-08
Gm47283	1.5074e-12	-0.178131	0.899	0.917	1.19763e-08
Polg2	1.52835e-12	0.639292	0.14	0.093	1.21427e-08
Ak2	1.58514e-12	0.229155	0.688	0.626	1.2594e-08
Wrnip1	1.62047e-12	0.462051	0.194	0.138	1.28746e-08
2700097O09Rik	1.64181e-12	0.415319	0.232	0.174	1.30442e-08
Rnf43	1.68847e-12	0.291092	0.376	0.304	1.34149e-08
Kynu	1.77371e-12	0.106361	0.981	0.969	1.40922e-08
Nxpe2	1.7884e-12	0.831995	0.075	0.041	1.42088e-08
Mdfic	1.79012e-12	-0.57321	0.305	0.36	1.42225e-08
Anxa7	1.86615e-12	0.453365	0.229	0.171	1.48266e-08
Saa4	1.86664e-12	-0.490843	0.354	0.408	1.48304e-08
Lclat1	1.91216e-12	0.345648	0.304	0.238	1.51921e-08
Nr1i2	1.91681e-12	-0.224148	0.662	0.708	1.52291e-08
Cflar	1.9614e-12	0.190437	0.763	0.709	1.55833e-08
Slco2b1	2.04784e-12	0.305164	0.381	0.313	1.62701e-08
Nrg4	2.10531e-12	-0.578077	0.357	0.406	1.67267e-08
Slc25a5	2.1905e-12	0.637836	0.158	0.11	1.74035e-08
Zfp101	2.19349e-12	0.522172	0.119	0.075	1.74273e-08
Oip5os1	2.22084e-12	0.315506	0.384	0.317	1.76446e-08
Pparg	2.24685e-12	0.685655	0.116	0.074	1.78512e-08
Tmc7	2.28586e-12	0.433538	0.226	0.168	1.81612e-08
Abhd12	2.33032e-12	0.58374	0.148	0.101	1.85144e-08
Rcor3	2.43781e-12	0.389922	0.288	0.227	1.93684e-08
9930021J03Rik	2.57553e-12	0.187351	0.674	0.61	2.04626e-08
Slc44a1	2.68713e-12	0.511715	0.219	0.164	2.13492e-08
Mxi1	2.75944e-12	0.490125	0.159	0.109	2.19237e-08
Hebp1	2.78727e-12	0.282616	0.433	0.37	2.21449e-08
1700042O10Rik	3.02868e-12	-0.441801	0.266	0.326	2.40628e-08
Atxn7l3b	3.1367e-12	0.459113	0.207	0.153	2.49211e-08
Pdia4	3.20768e-12	0.305556	0.389	0.322	2.5485e-08
Smad9	3.30215e-12	-0.498998	0.125	0.176	2.62356e-08
Eny2	3.36222e-12	0.334075	0.333	0.268	2.67129e-08
Fdx1	3.45266e-12	0.460163	0.276	0.217	2.74314e-08
C730036E19Rik	3.46815e-12	-0.469247	0.188	0.245	2.75544e-08
Rpl23	3.57992e-12	0.513799	0.253	0.196	2.84425e-08
Gm17133	3.58583e-12	-0.663022	0.072	0.113	2.84894e-08
1700112D23Rik	3.76906e-12	0.253906	0.473	0.4	2.99452e-08
Cyp2u1	3.82141e-12	-0.515847	0.172	0.226	3.03611e-08
Erbb4	3.84562e-12	-0.23359	0.811	0.82	3.05535e-08
Llgl2	3.99967e-12	0.609774	0.14	0.094	3.17774e-08
Vti1a	4.01508e-12	-0.211047	0.78	0.801	3.18998e-08
Zc3hav1	4.13563e-12	0.354765	0.292	0.231	3.28575e-08
Cdh18	4.14697e-12	-0.339514	0.232	0.295	3.29476e-08
Zc3h6	4.20124e-12	0.56483	0.158	0.109	3.33788e-08
Gm37240	4.63718e-12	0.16433	0.641	0.556	3.68424e-08
Sra1	4.64306e-12	-0.491872	0.158	0.211	3.68891e-08
Tns2	4.80769e-12	0.49277	0.188	0.136	3.81971e-08
Bri3	4.87214e-12	-0.334119	0.622	0.641	3.87091e-08
Map3k3	5.05219e-12	0.325229	0.384	0.32	4.01397e-08
Osbpl8	5.09191e-12	0.144141	0.882	0.839	4.04552e-08
Gm48321	5.1261e-12	0.220063	0.425	0.352	4.07269e-08
Ackr4	5.1554e-12	-0.333135	0.475	0.527	4.09597e-08
Nsmaf	5.21034e-12	0.375522	0.295	0.234	4.13962e-08
Rbfox2	5.38361e-12	-0.20057	0.791	0.815	4.27728e-08
Gcgr	5.67742e-12	-0.27695	0.668	0.702	4.51071e-08
Rnf217	6.00943e-12	-0.27559	0.598	0.637	4.77449e-08
6430548M08Rik	6.07223e-12	1.44914	0.038	0.015	4.82439e-08
C8g	6.09459e-12	0.325873	0.421	0.357	4.84215e-08
2011-09-01	6.18212e-12	0.768408	0.115	0.074	4.9117e-08
Vwce	6.44646e-12	0.257459	0.529	0.467	5.12171e-08
Smc4	6.5425e-12	0.517653	0.124	0.081	5.19801e-08
Apoc3	6.71914e-12	0.265964	0.822	0.772	5.33835e-08
Rpl24	6.72476e-12	0.601876	0.182	0.132	5.34282e-08
Magi1	6.77358e-12	0.116809	0.959	0.954	5.38161e-08
Caprin1	6.98007e-12	-0.178449	0.768	0.8	5.54567e-08
Dym	7.01866e-12	0.229855	0.611	0.558	5.57633e-08
Afm	7.0309e-12	0.213516	0.539	0.471	5.58605e-08
Ncln	7.31563e-12	-0.656211	0.09	0.134	5.81227e-08
Rufy3	7.40897e-12	0.219923	0.62	0.564	5.88643e-08
H2-T23	7.43875e-12	0.692283	0.103	0.064	5.91009e-08
Gatad2a	7.57049e-12	-0.330715	0.386	0.445	6.01475e-08
Lepr	7.87668e-12	0.825128	0.092	0.055	6.25803e-08
Heatr1	8.15202e-12	-0.61604	0.112	0.159	6.47678e-08
Acadsb	8.23705e-12	0.324268	0.355	0.294	6.54434e-08
Cblb	8.70731e-12	0.199516	0.484	0.411	6.91795e-08
Ric1	9.23207e-12	0.236053	0.481	0.416	7.33488e-08
Ugt2b1	9.66114e-12	-0.522191	0.321	0.374	7.67578e-08
St7l	9.8428e-12	-0.276963	0.463	0.523	7.8201e-08
Tspan14	9.87519e-12	0.460926	0.183	0.132	7.84584e-08
Elmod2	9.89766e-12	0.640316	0.116	0.075	7.86369e-08
Gm11844	9.93856e-12	0.544332	0.177	0.127	7.89619e-08
Acox1	1.0053e-11	0.159076	0.973	0.958	7.9871e-08
Clcc1	1.01587e-11	0.516747	0.166	0.117	8.07112e-08
Selenoo	1.04339e-11	0.383685	0.268	0.209	8.2897e-08
Lin7a	1.07504e-11	0.263089	0.409	0.339	8.54123e-08
Gm37494	1.09073e-11	0.227522	0.544	0.481	8.66586e-08
Zpr1	1.1344e-11	-0.322303	0.456	0.508	9.01284e-08
Gm26759	1.21097e-11	0.46579	0.17	0.12	9.62114e-08
Aldh1a7	1.24891e-11	-0.617777	0.142	0.191	9.92256e-08
Cd82	1.2974e-11	0.553712	0.114	0.073	1.03078e-07
Nphp3	1.30308e-11	0.588627	0.126	0.083	1.0353e-07
Setdb2	1.35112e-11	0.319479	0.457	0.401	1.07346e-07
Gm27017	1.37279e-11	0.787794	0.091	0.055	1.09068e-07
Ubap2	1.39487e-11	-0.353988	0.287	0.348	1.10823e-07
Mms19	1.42267e-11	0.308316	0.288	0.226	1.13031e-07
Uri1	1.43236e-11	0.240298	0.561	0.497	1.13801e-07
Sirt7	1.47248e-11	0.335436	0.341	0.28	1.16988e-07
D830024N08Rik	1.51201e-11	0.445258	0.206	0.153	1.2013e-07
Taf3	1.53695e-11	-0.359555	0.356	0.414	1.2211e-07
Miga2	1.74716e-11	0.381345	0.265	0.207	1.38812e-07
Map3k20	1.75427e-11	0.320731	0.399	0.335	1.39377e-07
Rpl35a	1.75945e-11	0.445917	0.208	0.155	1.39788e-07
Lin54	1.81761e-11	0.638611	0.111	0.071	1.4441e-07
Ppia	1.82024e-11	0.5166	0.235	0.183	1.44618e-07
Sh3glb1	1.82345e-11	0.340113	0.242	0.185	1.44873e-07
Susd1	1.88879e-11	0.658546	0.075	0.042	1.50064e-07
Sugct	1.90214e-11	0.180245	0.83	0.787	1.51125e-07
Jmy	1.91078e-11	0.273922	0.452	0.385	1.51812e-07
Dis3l2	1.93353e-11	-0.34479	0.419	0.474	1.53619e-07
Pdlim5	2.01688e-11	0.148704	0.706	0.64	1.60241e-07
Tor1aip1	2.04029e-11	0.258475	0.475	0.408	1.62101e-07
Rassf8	2.09077e-11	0.330107	0.343	0.282	1.66112e-07
Lrp4	2.10133e-11	0.601738	0.125	0.082	1.66951e-07
Pcmtd2	2.10898e-11	0.333283	0.368	0.309	1.67559e-07
Atrn	2.12982e-11	-0.177417	0.797	0.825	1.69214e-07
Sfpq	2.18091e-11	-0.268053	0.534	0.585	1.73273e-07
Bach1	2.23482e-11	0.293072	0.357	0.295	1.77556e-07
Cnot3	2.3142e-11	-0.416886	0.281	0.34	1.83863e-07
Rreb1	2.31743e-11	0.172626	0.739	0.672	1.8412e-07
Fcho2	2.32295e-11	0.186021	0.689	0.635	1.84558e-07
Atp9b	2.3595e-11	-0.241216	0.589	0.631	1.87462e-07
Dlg3	2.40802e-11	0.579211	0.128	0.086	1.91318e-07
Rps27a	2.44874e-11	0.413633	0.253	0.197	1.94552e-07
Zfp53	2.52758e-11	0.478759	0.201	0.151	2.00816e-07
Gpd2	2.54064e-11	-0.334903	0.476	0.526	2.01854e-07
Pacs2	2.61003e-11	0.568781	0.137	0.093	2.07367e-07
Acsm3	2.67259e-11	0.385697	0.277	0.219	2.12337e-07
Msi2	2.711e-11	-0.212313	0.633	0.671	2.15389e-07
Gnptab	2.72398e-11	0.759059	0.081	0.047	2.1642e-07
Thrb	2.76085e-11	-0.129375	0.979	0.975	2.1935e-07
Arnt	2.77019e-11	0.22197	0.59	0.525	2.20091e-07
Mad1l1	2.81362e-11	-0.408147	0.269	0.329	2.23542e-07
Fam160b1	2.81688e-11	0.285722	0.409	0.348	2.23801e-07
Tmem259	3.00235e-11	-0.366407	0.3	0.361	2.38537e-07
Pdk2	3.06779e-11	0.499324	0.162	0.115	2.43736e-07
Grip1	3.23355e-11	-0.670091	0.13	0.176	2.56905e-07
Prrc1	3.24692e-11	0.378933	0.307	0.249	2.57968e-07
Nudt4	3.40825e-11	0.282105	0.498	0.434	2.70785e-07
Ctnnbl1	3.42363e-11	-0.500815	0.18	0.232	2.72007e-07
Faf1	3.43195e-11	-0.17148	0.781	0.798	2.72668e-07
Slc27a5	3.45967e-11	0.303734	0.283	0.221	2.74871e-07
Scarf1	3.57114e-11	0.248181	0.352	0.286	2.83727e-07
Dhrs1	3.57412e-11	0.550764	0.127	0.085	2.83964e-07
Nipsnap2	3.58638e-11	0.345246	0.346	0.286	2.84938e-07
AW112010	3.59327e-11	0.82414	0.058	0.03	2.85485e-07
Ccdc122	3.60073e-11	0.590482	0.119	0.078	2.86078e-07
Trim7	3.74224e-11	0.412839	0.188	0.137	2.97321e-07
Gpat4	3.79704e-11	0.27655	0.403	0.34	3.01675e-07
Fbxl3	3.8398e-11	0.323226	0.328	0.268	3.05072e-07
Dpys	3.90484e-11	0.105297	0.796	0.716	3.10239e-07
Ido2	4.02336e-11	0.200702	0.51	0.435	3.19656e-07
Senp7	4.14449e-11	0.260786	0.358	0.295	3.2928e-07
Rps23	4.3327e-11	0.672983	0.149	0.104	3.44233e-07
Kansl3	4.4692e-11	0.250739	0.425	0.36	3.55078e-07
Lyst	4.50519e-11	0.196677	0.666	0.607	3.57937e-07
Tcaim	4.57205e-11	-0.429053	0.227	0.284	3.63249e-07
Rab9	4.65452e-11	-0.462702	0.164	0.215	3.69802e-07
Ephx2	4.74309e-11	-0.195727	0.813	0.824	3.76839e-07
Styx	4.82401e-11	0.337647	0.302	0.242	3.83267e-07
Fbp1	4.8636e-11	-0.174106	0.9	0.876	3.86413e-07
Rad50	5.0344e-11	0.420927	0.216	0.164	3.99983e-07
Nufip2	5.1538e-11	-0.231779	0.622	0.66	4.0947e-07
Cyp2c68	5.20615e-11	0.00681063	0.272	0.208	4.13629e-07
Gm40438	5.22712e-11	0.377568	0.308	0.249	4.15295e-07
Foxn2	5.30082e-11	0.328531	0.302	0.241	4.2115e-07
Pi4k2a	5.34093e-11	0.359274	0.312	0.257	4.24337e-07
Rnf38	5.54033e-11	0.256826	0.414	0.349	4.4018e-07
Dram2	5.55204e-11	0.312197	0.366	0.309	4.41109e-07
Cnn3	5.70458e-11	0.250354	0.421	0.358	4.53229e-07
Gm47200	5.82625e-11	-0.551612	0.127	0.175	4.62895e-07
Msh3	5.9896e-11	0.275154	0.384	0.32	4.75873e-07
Pkp2	6.1864e-11	0.291166	0.403	0.339	4.9151e-07
Pacsin2	6.42457e-11	0.256505	0.391	0.328	5.10432e-07
Med13	6.43152e-11	-0.22183	0.661	0.697	5.10985e-07
Nhlrc2	6.49711e-11	0.294808	0.408	0.35	5.16196e-07
Nr1h3	6.53265e-11	-0.417919	0.22	0.274	5.19019e-07
Kcnq1ot1	6.57257e-11	-0.276263	0.57	0.608	5.22191e-07
Galm	7.0469e-11	0.217433	0.544	0.474	5.59876e-07
Gm17106	7.21385e-11	0.412659	0.232	0.179	5.7314e-07
Mst1	7.29231e-11	-0.416512	0.359	0.413	5.79374e-07
Large1	7.37578e-11	-0.319397	0.523	0.566	5.86006e-07
Hps4	7.74285e-11	0.370679	0.213	0.16	6.15169e-07
Gm34777	7.84611e-11	0.46613	0.187	0.138	6.23373e-07
Maf	7.8906e-11	0.545312	0.143	0.099	6.26908e-07
Rps6ka5	7.91631e-11	0.541652	0.12	0.08	6.28951e-07
Trim37	8.11355e-11	0.80812	0.084	0.051	6.44622e-07
Cd47	8.22917e-11	0.288074	0.338	0.277	6.53808e-07
Oat	8.55733e-11	0.313053	0.248	0.188	6.7988e-07
Dnajc5	8.7154e-11	-0.310802	0.395	0.454	6.92439e-07
Abce1	8.74405e-11	-0.400688	0.238	0.294	6.94715e-07
Irs1	8.75374e-11	0.219515	0.472	0.409	6.95484e-07
Serpinf2	8.82769e-11	0.259782	0.476	0.414	7.0136e-07
Akr1c19	8.85275e-11	0.311113	0.259	0.202	7.03351e-07
Cyp4f15	8.86099e-11	0.203827	0.625	0.567	7.04006e-07
Bik	8.89219e-11	0.75002	0.104	0.067	7.06484e-07
Txn1	8.97216e-11	0.58588	0.133	0.091	7.12838e-07
Pex11a	9.01681e-11	-0.388235	0.253	0.31	7.16385e-07
D2hgdh	9.10511e-11	0.524778	0.157	0.111	7.23401e-07
Apof	9.25612e-11	0.428471	0.233	0.18	7.35398e-07
Phf21a	9.41876e-11	-0.19388	0.761	0.786	7.4832e-07
Helb	9.45566e-11	0.393308	0.206	0.155	7.51252e-07
Apoa4	9.47361e-11	0.607776	0.165	0.119	7.52678e-07
Rnf14	9.54325e-11	0.356006	0.292	0.234	7.58211e-07
Ufl1	9.63693e-11	0.299189	0.389	0.329	7.65654e-07
Ep400	9.7203e-11	-0.263142	0.579	0.625	7.72278e-07
H2afv	9.83655e-11	0.467008	0.177	0.129	7.81514e-07
Gpd1	1.01004e-10	-0.476139	0.311	0.363	8.02478e-07
Pms1	1.01317e-10	-0.399974	0.283	0.339	8.04963e-07
Ctcfl	1.01546e-10	-0.518466	0.131	0.178	8.06783e-07
Col27a1	1.02379e-10	-0.404212	0.324	0.378	8.13397e-07
Inpp5b	1.03793e-10	0.281769	0.345	0.283	8.24632e-07
Gpr180	1.04021e-10	0.578073	0.122	0.082	8.26443e-07
Tent2	1.04421e-10	0.21129	0.567	0.502	8.29623e-07
Rassf6	1.06723e-10	0.549596	0.175	0.129	8.47916e-07
Srpk2	1.1058e-10	0.221466	0.544	0.482	8.78562e-07
Zfp592	1.12277e-10	-0.361562	0.344	0.398	8.92041e-07
Nedd1	1.196e-10	0.369893	0.258	0.203	9.5022e-07
4931428L18Rik	1.20848e-10	0.593358	0.128	0.088	9.60137e-07
Cyp7a1	1.2189e-10	0.570851	0.173	0.126	9.68414e-07
Lnpk	1.24153e-10	0.551441	0.15	0.106	9.86398e-07
Fgfr1	1.24163e-10	-0.696343	0.069	0.106	9.86473e-07
Ctsh	1.24869e-10	0.280551	0.364	0.301	9.92087e-07
Mast4	1.33742e-10	0.304522	0.344	0.283	1.06258e-06
Polr2a	1.3435e-10	0.261068	0.36	0.297	1.06741e-06
Mup9	1.34914e-10	-0.538635	0.15	0.199	1.07189e-06
Rad51b	1.35364e-10	0.604195	0.149	0.105	1.07547e-06
Slco2a1	1.38299e-10	0.377005	0.26	0.205	1.09879e-06
Ubb	1.4042e-10	0.402382	0.233	0.181	1.11564e-06
Stxbp3	1.41493e-10	0.447613	0.21	0.16	1.12416e-06
Tnpo1	1.41637e-10	0.205557	0.562	0.501	1.12531e-06
Elmod3	1.45425e-10	-0.473877	0.15	0.199	1.1554e-06
Prdm2	1.46383e-10	-0.243447	0.633	0.669	1.16301e-06
Rpl27a	1.4661e-10	0.367107	0.308	0.25	1.16481e-06
Samd4	1.48041e-10	-0.64712	0.171	0.217	1.17619e-06
Smurf1	1.4959e-10	0.400223	0.21	0.159	1.1885e-06
Gm16552	1.49745e-10	0.269306	0.367	0.304	1.18972e-06
Hspa4	1.50571e-10	-0.316991	0.427	0.48	1.19629e-06
Mettl23	1.5249e-10	0.494646	0.201	0.153	1.21153e-06
1700012D14Rik	1.58474e-10	0.429899	0.228	0.178	1.25908e-06
Cox10	1.61801e-10	-0.419538	0.192	0.245	1.28551e-06
Gtf2a2	1.66489e-10	0.304164	0.333	0.275	1.32275e-06
Kdm6a	1.68603e-10	0.1909	0.639	0.59	1.33955e-06
Ly6e	1.80003e-10	0.600637	0.11	0.072	1.43012e-06
Dhdds	1.86251e-10	0.464644	0.19	0.142	1.47976e-06
Ubr4	1.90674e-10	-0.322983	0.44	0.489	1.51491e-06
Fth1	1.90877e-10	0.365364	0.368	0.308	1.51652e-06
Rev3l	1.94273e-10	0.203751	0.587	0.527	1.5435e-06
Hook3	1.98025e-10	0.159395	0.782	0.732	1.57331e-06
Gmip	1.99472e-10	-0.871158	0.038	0.066	1.58481e-06
Slc25a10	2.01613e-10	0.398374	0.195	0.145	1.60181e-06
Slc35f5	2.09185e-10	0.507207	0.169	0.123	1.66198e-06
Cep250	2.10494e-10	0.516813	0.111	0.073	1.67237e-06
Tmem87b	2.15019e-10	0.352231	0.282	0.227	1.70833e-06
5330438D12Rik	2.15758e-10	0.160246	0.51	0.436	1.7142e-06
Tlk2	2.20622e-10	-0.223499	0.589	0.627	1.75284e-06
Asap2	2.30463e-10	0.365075	0.204	0.154	1.83103e-06
Lncpint	2.30553e-10	0.0897695	0.951	0.931	1.83175e-06
Mark3	2.32931e-10	-0.269982	0.463	0.515	1.85064e-06
Morc3	2.34591e-10	-0.367133	0.259	0.317	1.86383e-06
Fam107b	2.35325e-10	0.276892	0.336	0.278	1.86966e-06
Ranbp10	2.35465e-10	0.182204	0.723	0.675	1.87077e-06
Selenos	2.44016e-10	0.494683	0.191	0.144	1.93871e-06
Cpsf6	2.53323e-10	0.190614	0.634	0.577	2.01265e-06
AW146154	2.57187e-10	0.478781	0.179	0.133	2.04335e-06
Slc26a1	2.65926e-10	-0.444363	0.201	0.253	2.11278e-06
Id3	2.65956e-10	0.495463	0.156	0.111	2.11302e-06
D230025D16Rik	2.6796e-10	-0.287329	0.514	0.56	2.12894e-06
Rpl30	2.87425e-10	0.539764	0.177	0.132	2.28359e-06
Tshz1	2.89512e-10	0.295109	0.355	0.296	2.30017e-06
Mfsd4a	2.91816e-10	0.424771	0.213	0.163	2.31848e-06
Slc46a3	2.94483e-10	0.562802	0.129	0.089	2.33967e-06
Zfp329	3.02514e-10	0.35226	0.243	0.19	2.40347e-06
Pcbd2	3.02842e-10	0.350209	0.228	0.176	2.40608e-06
Ciapin1	3.04337e-10	-0.436659	0.175	0.225	2.41796e-06
Mfhas1	3.04496e-10	-0.405547	0.288	0.34	2.41922e-06
Anapc5	3.08651e-10	0.599885	0.119	0.08	2.45223e-06
Adamts6	3.11488e-10	0.392507	0.296	0.241	2.47478e-06
Slc10a1	3.16036e-10	0.205934	0.629	0.566	2.51091e-06
Vps13d	3.17716e-10	-0.16244	0.784	0.801	2.52426e-06
Sod2	3.2756e-10	0.289175	0.354	0.295	2.60247e-06
Pprc1	3.34309e-10	-0.622398	0.088	0.128	2.65608e-06
Cst3	3.36904e-10	0.789202	0.064	0.035	2.6767e-06
Zfp760	3.53739e-10	0.680449	0.104	0.068	2.81046e-06
Serinc1	3.6002e-10	0.318957	0.288	0.233	2.86036e-06
Parg	3.63371e-10	-0.331952	0.346	0.399	2.88698e-06
Gm4070	3.72466e-10	-1.12248	0.015	0.035	2.95924e-06
Upf3b	3.7662e-10	0.329724	0.317	0.261	2.99225e-06
Prpf40a	3.83166e-10	-0.221125	0.564	0.609	3.04425e-06
Cyp4a12b	3.87616e-10	-0.363498	0.213	0.267	3.07961e-06
Cxxc5	3.90316e-10	0.409339	0.209	0.159	3.10106e-06
Kank2	3.95486e-10	0.454944	0.148	0.105	3.14213e-06
Ncoa2	4.20954e-10	-0.171765	0.81	0.822	3.34448e-06
Dnajc19	4.22682e-10	0.243623	0.322	0.261	3.35821e-06
Arfgap3	4.28559e-10	0.523358	0.105	0.068	3.4049e-06
Dnajc10	4.29728e-10	0.546034	0.145	0.103	3.41419e-06
Pnisr	4.46877e-10	0.140962	0.848	0.812	3.55044e-06
St7	4.53323e-10	-0.343494	0.393	0.447	3.60165e-06
Fabp1	4.55474e-10	0.230055	0.953	0.916	3.61874e-06
G3bp1	4.77272e-10	-0.406046	0.244	0.296	3.79193e-06
Rtp4	4.79611e-10	0.411676	0.189	0.143	3.81051e-06
Vps37b	4.80006e-10	0.417221	0.193	0.145	3.81364e-06
Srrt	5.0593e-10	-0.498686	0.192	0.243	4.01961e-06
Wdr37	5.15799e-10	-0.393341	0.283	0.336	4.09802e-06
Thra	5.16789e-10	0.950126	0.046	0.022	4.10589e-06
Strn3	5.23552e-10	-0.157859	0.775	0.797	4.15962e-06
Pim3	5.40332e-10	0.246722	0.402	0.339	4.29294e-06
Esyt2	5.5585e-10	0.237209	0.491	0.429	4.41623e-06
Fbxw8	5.62273e-10	-0.430324	0.195	0.246	4.46726e-06
Retreg2	5.74323e-10	0.402149	0.151	0.108	4.563e-06
Cd164	5.7512e-10	0.343349	0.261	0.208	4.56933e-06
Dpyd	5.77336e-10	-0.0780373	0.998	0.998	4.58693e-06
Sephs2	5.84963e-10	0.240767	0.565	0.507	4.64753e-06
Mpp5	6.35679e-10	0.21481	0.383	0.32	5.05047e-06
Calr	6.56773e-10	-0.262091	0.398	0.449	5.21806e-06
Cpsf2	6.67571e-10	-0.611676	0.088	0.127	5.30386e-06
Bcr	6.98218e-10	0.284709	0.306	0.251	5.54734e-06
Eif2ak1	6.98876e-10	0.37866	0.204	0.155	5.55257e-06
Supt5	7.05126e-10	-0.352219	0.307	0.36	5.60223e-06
Oaf	7.10012e-10	-0.209478	0.661	0.688	5.64104e-06
Camta1	7.15829e-10	0.415265	0.192	0.144	5.68726e-06
Gm30505	7.18228e-10	0.239039	0.36	0.298	5.70632e-06
Sft2d2	7.19508e-10	0.523352	0.094	0.06	5.71649e-06
Dph5	7.28483e-10	-0.393725	0.181	0.232	5.78779e-06
1810013L24Rik	7.36435e-10	0.24284	0.445	0.384	5.85098e-06
Tank	7.49805e-10	-0.323002	0.346	0.401	5.9572e-06
Atxn7l1	7.61748e-10	0.202899	0.53	0.47	6.05208e-06
Tcim	7.67233e-10	-0.470425	0.398	0.436	6.09566e-06
Klf6	7.74882e-10	1.2797	0.031	0.012	6.15644e-06
Ugt3a2	8.07379e-10	0.231531	0.429	0.366	6.41463e-06
Acot13	8.28795e-10	0.655429	0.132	0.093	6.58477e-06
Kras	8.34199e-10	0.393623	0.27	0.219	6.62771e-06
Olfml1	8.36971e-10	0.402252	0.202	0.154	6.64974e-06
Pde3b	8.41514e-10	0.167619	0.768	0.711	6.68583e-06
Gm16193	8.44123e-10	0.265457	0.348	0.288	6.70656e-06
Atf7ip	8.44665e-10	0.200562	0.533	0.475	6.71087e-06
Mapkap1	8.46889e-10	-0.228376	0.623	0.67	6.72853e-06
Rps4x	8.60874e-10	0.716161	0.114	0.077	6.83965e-06
Txndc15	8.63782e-10	0.417122	0.222	0.173	6.86275e-06
Hsp90aa1	8.73551e-10	-0.564997	0.119	0.162	6.94036e-06
Tnks	8.78786e-10	-0.291759	0.507	0.546	6.98196e-06
Ctsb	8.81336e-10	0.382994	0.198	0.15	7.00221e-06
Mef2a	8.8216e-10	0.184221	0.652	0.593	7.00876e-06
Vegfa	8.96421e-10	0.141506	0.848	0.798	7.12206e-06
Pank1	9.40733e-10	0.099018	0.891	0.846	7.47412e-06
Atp6v1b2	9.45427e-10	0.354647	0.273	0.221	7.51141e-06
Rfc1	9.54488e-10	0.356966	0.2	0.152	7.5834e-06
Zfp281	9.68614e-10	0.392937	0.205	0.156	7.69564e-06
Strbp	9.77467e-10	-0.145356	0.831	0.842	7.76597e-06
Ckap5	9.78184e-10	0.322281	0.331	0.275	7.77167e-06
Pgpep1	1.00237e-09	0.586879	0.127	0.088	7.96386e-06
Dlst	1.00807e-09	-0.325382	0.307	0.361	8.00911e-06
Lysmd4	1.0098e-09	0.317204	0.264	0.21	8.02284e-06
Gm4952	1.03844e-09	0.327383	0.288	0.234	8.25044e-06
Uqcrfs1	1.04407e-09	0.633503	0.11	0.074	8.29516e-06
Nectin3	1.0592e-09	0.189769	0.481	0.419	8.41538e-06
Zfp131	1.06267e-09	-0.4214	0.169	0.219	8.44291e-06
Snrk	1.06404e-09	-0.33474	0.387	0.435	8.45377e-06
Neu1	1.08922e-09	0.651229	0.117	0.08	8.65386e-06
Slc22a5	1.13043e-09	-0.499534	0.183	0.231	8.98124e-06
Flcn	1.16209e-09	0.363259	0.261	0.209	9.23283e-06
Zfp518a	1.16778e-09	0.7615	0.076	0.046	9.278e-06
Dcaf5	1.20114e-09	-0.299846	0.488	0.527	9.54307e-06
Rabgef1	1.22066e-09	0.254866	0.351	0.294	9.69816e-06
Sgk3	1.26413e-09	0.347573	0.262	0.209	1.00435e-05
Tmem214	1.28459e-09	-0.419419	0.217	0.267	1.02061e-05
Msmo1	1.31736e-09	0.312508	0.255	0.201	1.04665e-05
Pls3	1.35495e-09	0.269372	0.322	0.264	1.07651e-05
Erc1	1.35869e-09	-0.177547	0.799	0.807	1.07948e-05
Stim1	1.36236e-09	0.203345	0.467	0.402	1.0824e-05
Als2	1.3973e-09	0.20891	0.601	0.542	1.11016e-05
Als2cl	1.40112e-09	0.311609	0.261	0.209	1.11319e-05
Tmem59	1.41632e-09	0.366097	0.252	0.201	1.12527e-05
Iars	1.43348e-09	-0.489086	0.164	0.211	1.1389e-05
Apol7a	1.44731e-09	0.51228	0.173	0.13	1.14989e-05
Rab4a	1.53488e-09	0.351878	0.206	0.158	1.21946e-05
Ggact	1.68921e-09	-0.285352	0.576	0.605	1.34207e-05
Bfar	1.72149e-09	0.305181	0.355	0.301	1.36772e-05
Rad51d	1.75846e-09	0.449455	0.131	0.092	1.3971e-05
Ppp1r21	1.87358e-09	0.386213	0.212	0.163	1.48856e-05
Tmem50a	1.90598e-09	0.295604	0.294	0.239	1.5143e-05
Tpcn1	1.92018e-09	0.396518	0.216	0.169	1.52558e-05
Slc30a9	1.98321e-09	-0.243593	0.513	0.557	1.57566e-05
Suds3	1.99383e-09	0.284431	0.356	0.298	1.5841e-05
Gm31333	2.00125e-09	-0.3309	0.334	0.388	1.59e-05
Map4k4	2.02041e-09	0.557702	0.128	0.09	1.60522e-05
Ssh2	2.02599e-09	-0.261467	0.459	0.505	1.60965e-05
Derl2	2.03885e-09	0.201838	0.545	0.487	1.61987e-05
Wsb2	2.06422e-09	0.432468	0.181	0.136	1.64002e-05
Slc25a22	2.06665e-09	0.174301	0.476	0.414	1.64195e-05
Cfdp1	2.09379e-09	-0.360471	0.302	0.351	1.66351e-05
Atad2	2.15884e-09	0.540259	0.117	0.08	1.7152e-05
Gm46367	2.21486e-09	0.263469	0.318	0.261	1.7597e-05
Timm9	2.22449e-09	-0.350565	0.311	0.362	1.76736e-05
Etv5	2.30227e-09	0.83067	0.054	0.029	1.82915e-05
Ndufa13	2.35218e-09	0.499	0.192	0.147	1.86881e-05
Slc6a13	2.36777e-09	-0.227691	0.578	0.621	1.88119e-05
Fam193b	2.41284e-09	-0.410535	0.44	0.481	1.917e-05
Stx7	2.42902e-09	0.457709	0.15	0.109	1.92986e-05
Ttpal	2.43275e-09	-0.705746	0.071	0.105	1.93282e-05
Usp53	2.46348e-09	0.282895	0.273	0.218	1.95724e-05
Ndufa4	2.46965e-09	0.461365	0.243	0.195	1.96214e-05
Hat1	2.48092e-09	0.738084	0.073	0.044	1.97109e-05
Ftl1	2.49662e-09	-0.212376	0.628	0.666	1.98356e-05
Slmap	2.51703e-09	-0.199767	0.69	0.711	1.99978e-05
Dcaf17	2.52151e-09	0.332209	0.227	0.178	2.00334e-05
Aco2	2.52578e-09	-0.282149	0.456	0.497	2.00673e-05
Plekhj1	2.5913e-09	-0.591402	0.096	0.135	2.05879e-05
Tmem184b	2.75974e-09	0.492428	0.116	0.079	2.19262e-05
Dvl1	2.76387e-09	-0.348382	0.335	0.388	2.1959e-05
Scai	2.85708e-09	0.40142	0.198	0.151	2.26995e-05
Igf2r	3.04849e-09	0.397053	0.2	0.154	2.42203e-05
B4galnt1	3.08138e-09	0.373513	0.164	0.121	2.44815e-05
Sin3a	3.14787e-09	0.299365	0.346	0.291	2.50098e-05
1300017J02Rik	3.19789e-09	0.227726	0.467	0.411	2.54072e-05
Clec2d	3.21214e-09	0.139904	0.836	0.787	2.55204e-05
Mark2	3.22084e-09	-0.281004	0.416	0.462	2.55896e-05
Eif4a2	3.25053e-09	0.18553	0.571	0.516	2.58254e-05
Pafah1b1	3.32201e-09	0.142531	0.729	0.683	2.63934e-05
Ptcd3	3.36447e-09	-0.309756	0.265	0.317	2.67307e-05
Prdm15	3.38486e-09	-0.456234	0.169	0.215	2.68927e-05
Tmem263	3.41679e-09	0.550803	0.108	0.073	2.71464e-05
Nfic	3.42576e-09	0.404453	0.213	0.166	2.72177e-05
Smad1	3.43624e-09	0.326815	0.301	0.25	2.7301e-05
Cyb5r3	3.47909e-09	0.380935	0.207	0.161	2.76414e-05
Mcm10	3.55001e-09	-0.254791	0.484	0.531	2.82048e-05
Raf1	3.5813e-09	-0.208529	0.644	0.671	2.84534e-05
Pitpnm2	3.6277e-09	0.25952	0.407	0.352	2.88221e-05
Entpd5	3.64854e-09	0.435165	0.211	0.166	2.89876e-05
Dhrs4	3.66994e-09	-0.310063	0.328	0.381	2.91577e-05
Smad6	3.73711e-09	1.04769	0.043	0.022	2.96914e-05
Pkd2l2	3.78719e-09	0.46693	0.13	0.092	3.00892e-05
Ndrg3	3.82825e-09	-0.288756	0.382	0.431	3.04154e-05
Fam207a	3.98008e-09	-0.400451	0.198	0.246	3.16217e-05
Neb	3.98694e-09	-0.309263	0.346	0.397	3.16762e-05
Gm26787	4.06669e-09	0.557971	0.128	0.09	3.23099e-05
Mapk15	4.09306e-09	0.414233	0.17	0.127	3.25194e-05
Gm20528	4.1831e-09	-0.0513557	0.807	0.679	3.32347e-05
Fgfr1op	4.24032e-09	0.393938	0.179	0.134	3.36894e-05
Sec63	4.32115e-09	0.148876	0.8	0.756	3.43315e-05
Gm42109	4.4422e-09	0.260626	0.376	0.321	3.52933e-05
Cul5	4.47245e-09	-0.304931	0.256	0.308	3.55336e-05
Gtf3c2	4.52807e-09	0.250619	0.394	0.339	3.59755e-05
Filip1l	4.62876e-09	-0.468456	0.17	0.215	3.67755e-05
Mcfd2	4.66765e-09	-0.338493	0.277	0.33	3.70845e-05
Cpn2	4.95619e-09	0.501374	0.172	0.13	3.93769e-05
4930565N06Rik	4.962e-09	0.597585	0.11	0.075	3.94231e-05
Mllt10	4.98511e-09	0.112887	0.92	0.892	3.96067e-05
Ralgapb	5.29511e-09	-0.254696	0.364	0.419	4.20696e-05
Hnmt	5.3263e-09	0.542065	0.107	0.073	4.23175e-05
Fndc3a	5.37294e-09	0.128042	0.773	0.731	4.2688e-05
Osbpl2	5.49016e-09	0.404989	0.174	0.13	4.36193e-05
Stxbp4	5.59371e-09	-0.463769	0.137	0.181	4.44421e-05
Otud7b	5.80884e-09	-0.324158	0.472	0.508	4.61513e-05
Upf1	5.86131e-09	-0.529675	0.127	0.169	4.65681e-05
4833420G17Rik	5.8802e-09	0.237732	0.476	0.421	4.67182e-05
Bst2	5.95815e-09	0.48474	0.139	0.1	4.73375e-05
Sigmar1	6.01429e-09	0.453258	0.176	0.133	4.77835e-05
Gm16158	6.0645e-09	0.446744	0.167	0.125	4.81824e-05
Sec23a	6.09008e-09	0.213454	0.471	0.418	4.83856e-05
Ero1l	6.10715e-09	0.416044	0.147	0.107	4.85213e-05
E530011L22Rik	6.15161e-09	0.406261	0.186	0.141	4.88745e-05
Lncppara	6.19e-09	0.285312	0.332	0.282	4.91796e-05
Timd2	6.26737e-09	0.214668	0.397	0.339	4.97943e-05
Cat	6.51034e-09	-0.129038	0.918	0.912	5.17246e-05
Crebbp	6.5974e-09	-0.133944	0.834	0.842	5.24164e-05
Gm43449	6.59805e-09	0.580259	0.146	0.107	5.24215e-05
Per1	6.81421e-09	0.387846	0.188	0.144	5.41389e-05
Manf	6.83543e-09	0.205977	0.42	0.358	5.43075e-05
Reep3	7.13791e-09	-0.260512	0.535	0.579	5.67107e-05
Aspscr1	7.2815e-09	0.252914	0.325	0.269	5.78515e-05
Ndor1	7.37624e-09	-0.701904	0.087	0.122	5.86042e-05
Herc4	7.52462e-09	0.160083	0.7	0.645	5.97831e-05
Zfp182	7.56217e-09	0.361804	0.252	0.203	6.00814e-05
Slc25a23	7.68965e-09	0.286572	0.268	0.217	6.10943e-05
Slc20a2	7.76635e-09	0.155154	0.662	0.601	6.17037e-05
Herpud1	7.85332e-09	-0.00471793	0.942	0.854	6.23947e-05
Hnrnpu	7.85367e-09	0.147376	0.8	0.762	6.23974e-05
Taf8	7.86117e-09	0.593063	0.103	0.069	6.2457e-05
Cab39l	7.92891e-09	0.180423	0.562	0.507	6.29952e-05
Rbm39	7.94756e-09	0.111984	0.937	0.907	6.31434e-05
Sec16a	8.05678e-09	0.215445	0.508	0.452	6.40111e-05
Nol10	8.14309e-09	-0.458965	0.133	0.175	6.46969e-05
Mia2	8.23138e-09	0.0979881	0.961	0.936	6.53983e-05
Clpb	8.24009e-09	-0.420442	0.164	0.209	6.54675e-05
Nudt12	8.26779e-09	0.317897	0.313	0.262	6.56876e-05
Rnf103	8.61307e-09	0.194498	0.487	0.426	6.84309e-05
Chic2	8.79278e-09	0.24755	0.457	0.404	6.98586e-05
Otulin	9.00135e-09	-0.275601	0.452	0.495	7.15158e-05
Pik3c2g	9.03428e-09	-0.20801	0.619	0.651	7.17773e-05
Tshz3	9.21057e-09	-0.958293	0.038	0.064	7.3178e-05
BC052040	9.41639e-09	0.28198	0.22	0.172	7.48132e-05
Abca9	9.51899e-09	0.736292	0.077	0.048	7.56284e-05
Cebpb	9.5836e-09	-0.281863	0.559	0.589	7.61417e-05
Ypel5	9.59063e-09	0.334103	0.241	0.193	7.61975e-05
Mpc2	9.89575e-09	0.21668	0.444	0.387	7.86218e-05
Id2	1.00127e-08	0.326968	0.366	0.315	7.95508e-05
Wrn	1.01953e-08	0.319814	0.267	0.218	8.10018e-05
Rnf130	1.03155e-08	0.245214	0.368	0.313	8.19565e-05
Cog5	1.0511e-08	0.171101	0.557	0.494	8.35103e-05
Foxo1	1.08327e-08	-0.222722	0.628	0.659	8.60659e-05
Ntm	1.09269e-08	-0.81746	0.019	0.038	8.6814e-05
Bnip1	1.12069e-08	0.469558	0.148	0.109	8.90389e-05
Bnip3	1.1304e-08	0.277476	0.366	0.313	8.98099e-05
Tex2	1.1448e-08	0.185121	0.613	0.559	9.09547e-05
Mgmt	1.1455e-08	0.243684	0.383	0.328	9.10096e-05
Crem	1.20515e-08	-0.304265	0.437	0.48	9.57488e-05
Sympk	1.2064e-08	-0.420634	0.164	0.209	9.58482e-05
Stub1	1.22439e-08	-0.383235	0.201	0.248	9.72777e-05
Zfp715	1.23608e-08	-0.50772	0.09	0.127	9.82064e-05
Arl3	1.25902e-08	0.468036	0.101	0.068	0.000100029
Atp13a1	1.26296e-08	-0.438859	0.128	0.17	0.000100342
Aifm1	1.27071e-08	0.339476	0.28	0.229	0.000100958
Ablim1	1.27258e-08	0.300451	0.33	0.28	0.000101106
Acaa1a	1.27833e-08	0.264457	0.328	0.273	0.000101564
1500035N22Rik	1.28336e-08	0.438178	0.133	0.095	0.000101963
Cyp4v3	1.28991e-08	0.187588	0.507	0.447	0.000102484
1810034E14Rik	1.29399e-08	0.377168	0.203	0.158	0.000102807
Tomm40l	1.3065e-08	0.377097	0.165	0.124	0.000103802
Rpl36al	1.44269e-08	0.305739	0.269	0.217	0.000114621
Mrpl24	1.4506e-08	-0.446514	0.128	0.17	0.00011525
Wdr60	1.45198e-08	0.518658	0.119	0.083	0.00011536
Map2k3	1.48525e-08	0.373629	0.168	0.126	0.000118003
Jak2	1.50053e-08	0.410467	0.16	0.12	0.000119217
Vgll4	1.50302e-08	0.157403	0.64	0.592	0.000119415
Aldh3a2	1.5339e-08	0.162951	0.261	0.207	0.000121869
[truncated: 5,946 more rows]

## Sheet: ORA_Hepatocytes
	ID	Description	GeneRatio	BgRatio	pvalue	p.adjust	qvalue	geneID	Count	Reference	Direction	Comparison
HALLMARK_XENOBIOTIC_METABOLISM	HALLMARK_XENOBIOTIC_METABOLISM	HALLMARK_XENOBIOTIC_METABOLISM	22/110	145/2342	3.97761e-07	1.71037e-05	1.46544e-05	Gnmt/Abcc3/Cdo1/Apoe/Igfbp1/Pcx/Gsta3/Ahcy/Papss2/Ces1d/Fmo1/F11/Cyp27a1/Angptl3/Pgrmc1/Gstt2/Cd36/Csad/Mccc2/Ddt/Atoh8/Tmem176b	22	HALLMARK	up	NP
HALLMARK_UV_RESPONSE_UP	HALLMARK_UV_RESPONSE_UP	HALLMARK_UV_RESPONSE_UP	12/110	79/2342	0.000227088	0.00488238	0.00418319	Ctsl/Cdo1/Sult1a1/Btg2/Fmo1/Ccnd3/Junb/Nr4a1/Creg1/Btg1/Igfbp2/Bcl2l11	12	HALLMARK	up	NP
HALLMARK_TNFA_SIGNALING_VIA_NFKB	HALLMARK_TNFA_SIGNALING_VIA_NFKB	HALLMARK_TNFA_SIGNALING_VIA_NFKB	13/110	99/2342	0.000544538	0.00780505	0.00668731	Nfil3/Btg2/Eif1/Irs2/Jun/Junb/Nr4a1/Btg1/Tiparp/Cebpd/Ptpre/Il18/Klf6	13	HALLMARK	up	NP
HALLMARK_HYPOXIA	HALLMARK_HYPOXIA	HALLMARK_HYPOXIA	11/110	100/2342	0.00614804	0.0660914	0.0566267	Igfbp1/Nfil3/Irs2/Pdk1/Jun/Btg1/Tiparp/Cited2/Prdx5/Dcn/Klf6	11	HALLMARK	up	NP
HALLMARK_IL2_STAT5_SIGNALING	HALLMARK_IL2_STAT5_SIGNALING	HALLMARK_IL2_STAT5_SIGNALING	10/110	96/2342	0.0129498	0.111368	0.0954196	Rgs16/Ahcy/Nfil3/Arl4a/Serpinb6a/Ahr/Ccnd3/Cd81/Nt5e/Klf6	10	HALLMARK	up	NP
HALLMARK_BILE_ACID_METABOLISM	HALLMARK_BILE_ACID_METABOLISM	HALLMARK_BILE_ACID_METABOLISM	9/110	87/2342	0.0189145	0.126212	0.108138	Gnmt/Akr1d1/Cyp8b1/Cyp27a1/Agxt/Cyp7a1/Pxmp2/Idh2/Prdx5	9	HALLMARK	up	NP
HALLMARK_P53_PATHWAY	HALLMARK_P53_PATHWAY	HALLMARK_P53_PATHWAY	10/110	103/2342	0.0205462	0.126212	0.108138	Rgs16/Abat/Btg2/Zfp36l1/Ccnd3/Jun/Btg1/Cd81/S100a10/Ptpre	10	HALLMARK	up	NP
HALLMARK_APOPTOSIS	HALLMARK_APOPTOSIS	HALLMARK_APOPTOSIS	9/110	91/2342	0.02471	0.132816	0.113796	Cth/Btg2/Psen2/Pdcd4/Jun/Smad7/Il18/Dcn/Bcl2l11	9	HALLMARK	up	NP
HALLMARK_CHOLESTEROL_HOMEOSTASIS	HALLMARK_CHOLESTEROL_HOMEOSTASIS	HALLMARK_CHOLESTEROL_HOMEOSTASIS	5/110	47/2342	0.0666289	0.302765	0.259407	Scd1/Trp53inp1/Nfil3/Hmgcs1/Pparg	5	HALLMARK	up	NP
HALLMARK_ANDROGEN_RESPONSE	HALLMARK_ANDROGEN_RESPONSE	HALLMARK_ANDROGEN_RESPONSE	7/110	78/2342	0.0704105	0.302765	0.259407	Scd1/Fkbp5/Insig1/Ccnd3/Hpgd/Gpd1l/Hmgcs1	7	HALLMARK	up	NP
HALLMARK_KRAS_SIGNALING_DN	HALLMARK_KRAS_SIGNALING_DN	HALLMARK_KRAS_SIGNALING_DN	4/110	40/2342	0.115355	0.386005	0.330726	Slc16a7/Btg2/Gamt/Igfbp2	4	HALLMARK	up	NP
HALLMARK_UV_RESPONSE_DN	HALLMARK_UV_RESPONSE_DN	HALLMARK_UV_RESPONSE_DN	8/110	106/2342	0.121108	0.386005	0.330726	Dlc1/Nfib/Ddah1/Insig1/Syne1/Smad7/Pparg/Cited2	8	HALLMARK	up	NP
HALLMARK_GLYCOLYSIS	HALLMARK_GLYCOLYSIS	HALLMARK_GLYCOLYSIS	8/110	107/2342	0.126001	0.386005	0.330726	Cth/Pcx/Irs2/Pfkfb1/Got1/Cited2/Dcn/Nt5e	8	HALLMARK	up	NP
HALLMARK_KRAS_SIGNALING_UP	HALLMARK_KRAS_SIGNALING_UP	HALLMARK_KRAS_SIGNALING_UP	7/110	90/2342	0.126539	0.386005	0.330726	Rgs16/Gadd45g/Mpzl2/St6gal1/Serpina3n/Tmem176b/Reln	7	HALLMARK	up	NP
HALLMARK_EPITHELIAL_MESENCHYMAL_TRANSITION	HALLMARK_EPITHELIAL_MESENCHYMAL_TRANSITION	HALLMARK_EPITHELIAL_MESENCHYMAL_TRANSITION	6/110	76/2342	0.14363	0.386005	0.330726	Cxcl12/Jun/Igfbp2/Adam12/Dcn/Nt5e	6	HALLMARK	up	NP
HALLMARK_INFLAMMATORY_RESPONSE	HALLMARK_INFLAMMATORY_RESPONSE	HALLMARK_INFLAMMATORY_RESPONSE	6/110	76/2342	0.14363	0.386005	0.330726	Rgs16/Btg2/Ahr/Ptpre/Il18/Klf6	6	HALLMARK	up	NP
HALLMARK_ESTROGEN_RESPONSE_EARLY	HALLMARK_ESTROGEN_RESPONSE_EARLY	HALLMARK_ESTROGEN_RESPONSE_EARLY	7/110	100/2342	0.186534	0.471822	0.404254	Dlc1/Retreg1/Abat/Fkbp5/Papss2/Cxcl12/Tiparp	7	HALLMARK	up	NP
HALLMARK_COAGULATION	HALLMARK_COAGULATION	HALLMARK_COAGULATION	6/110	87/2342	0.221927	0.506061	0.43359	Fgg/Ctsl/Trf/Fga/F11/F13b	6	HALLMARK	up	NP
HALLMARK_MTORC1_SIGNALING	HALLMARK_MTORC1_SIGNALING	HALLMARK_MTORC1_SIGNALING	8/110	127/2342	0.243461	0.506061	0.43359	Cth/Scd1/Nfil3/Btg2/Insig1/Pdk1/Got1/Hmgcs1	8	HALLMARK	up	NP
HALLMARK_MYOGENESIS	HALLMARK_MYOGENESIS	HALLMARK_MYOGENESIS	5/110	72/2342	0.247613	0.506061	0.43359	Pcx/Scd1/Psen2/Cd36/Adam12	5	HALLMARK	up	NP
HALLMARK_ESTROGEN_RESPONSE_LATE	HALLMARK_ESTROGEN_RESPONSE_LATE	HALLMARK_ESTROGEN_RESPONSE_LATE	6/110	91/2342	0.253462	0.506061	0.43359	Fkbp5/Papss2/Pdcd4/Cxcl12/Serpina3n/Idh2	6	HALLMARK	up	NP
HALLMARK_WNT_BETA_CATENIN_SIGNALING	HALLMARK_WNT_BETA_CATENIN_SIGNALING	HALLMARK_WNT_BETA_CATENIN_SIGNALING	2/110	21/2342	0.258915	0.506061	0.43359	Psen2/Hdac11	2	HALLMARK	up	NP
HALLMARK_FATTY_ACID_METABOLISM	HALLMARK_FATTY_ACID_METABOLISM	HALLMARK_FATTY_ACID_METABOLISM	7/110	113/2342	0.278452	0.520584	0.446033	Fmo1/Inmt/Hpgd/Cd36/Hmgcs1/S100a10/Mcee	7	HALLMARK	up	NP
HALLMARK_ADIPOGENESIS	HALLMARK_ADIPOGENESIS	HALLMARK_ADIPOGENESIS	8/110	150/2342	0.408106	0.731191	0.626479	Sult1a1/Apoe/Arl4a/Cmbl/Pdcd4/Cd36/Ddt/Pparg	8	HALLMARK	up	NP
HALLMARK_REACTIVE_OXYGEN_SPECIES_PATHWAY	HALLMARK_REACTIVE_OXYGEN_SPECIES_PATHWAY	HALLMARK_REACTIVE_OXYGEN_SPECIES_PATHWAY	2/110	33/2342	0.464308	0.79861	0.684243	Mgst1/Junb	2	HALLMARK	up	NP
HALLMARK_ANGIOGENESIS	HALLMARK_ANGIOGENESIS	HALLMARK_ANGIOGENESIS	1/110	15/2342	0.515107	0.8345	0.714994	Apoh	1	HALLMARK	up	NP
HALLMARK_NOTCH_SIGNALING	HALLMARK_NOTCH_SIGNALING	HALLMARK_NOTCH_SIGNALING	1/110	16/2342	0.538029	0.8345	0.714994	Psen2	1	HALLMARK	up	NP
HALLMARK_SPERMATOGENESIS	HALLMARK_SPERMATOGENESIS	HALLMARK_SPERMATOGENESIS	2/110	40/2342	0.568357	0.8345	0.714994	Arl4a/Tulp2	2	HALLMARK	up	NP
HALLMARK_HEDGEHOG_SIGNALING	HALLMARK_HEDGEHOG_SIGNALING	HALLMARK_HEDGEHOG_SIGNALING	1/110	18/2342	0.580699	0.8345	0.714994	Nrp2	1	HALLMARK	up	NP
HALLMARK_PEROXISOME	HALLMARK_PEROXISOME	HALLMARK_PEROXISOME	3/110	64/2342	0.586611	0.8345	0.714994	Idh2/Prdx5/Msh2	3	HALLMARK	up	NP
HALLMARK_IL6_JAK_STAT3_SIGNALING	HALLMARK_IL6_JAK_STAT3_SIGNALING	HALLMARK_IL6_JAK_STAT3_SIGNALING	2/110	43/2342	0.608331	0.8345	0.714994	Cd36/Jun	2	HALLMARK	up	NP
HALLMARK_TGF_BETA_SIGNALING	HALLMARK_TGF_BETA_SIGNALING	HALLMARK_TGF_BETA_SIGNALING	2/110	44/2342	0.621024	0.8345	0.714994	Junb/Smad7	2	HALLMARK	up	NP
HALLMARK_HEME_METABOLISM	HALLMARK_HEME_METABOLISM	HALLMARK_HEME_METABOLISM	5/110	117/2342	0.6533	0.851269	0.729362	Pcx/Psmd9/Btg2/Aldh6a1/Ccnd3	5	HALLMARK	up	NP
HALLMARK_APICAL_JUNCTION	HALLMARK_APICAL_JUNCTION	HALLMARK_APICAL_JUNCTION	3/110	92/2342	0.817811	0.989058	0.847418	Insig1/Mpzl2/Gamt	3	HALLMARK	up	NP
HALLMARK_DNA_REPAIR	HALLMARK_DNA_REPAIR	HALLMARK_DNA_REPAIR	2/110	68/2342	0.838971	0.989058	0.847418	Nt5c3/Gtf2h5	2	HALLMARK	up	NP
HALLMARK_PI3K_AKT_MTOR_SIGNALING	HALLMARK_PI3K_AKT_MTOR_SIGNALING	HALLMARK_PI3K_AKT_MTOR_SIGNALING	2/110	70/2342	0.850743	0.989058	0.847418	Map2k6/Pdk1	2	HALLMARK	up	NP
HALLMARK_E2F_TARGETS	HALLMARK_E2F_TARGETS	HALLMARK_E2F_TARGETS	2/110	73/2342	0.86695	0.989058	0.847418	Paics/Msh2	2	HALLMARK	up	NP
HALLMARK_ALLOGRAFT_REJECTION	HALLMARK_ALLOGRAFT_REJECTION	HALLMARK_ALLOGRAFT_REJECTION	2/110	83/2342	0.910069	0.989058	0.847418	Ccnd3/Il18	2	HALLMARK	up	NP
HALLMARK_OXIDATIVE_PHOSPHORYLATION	HALLMARK_OXIDATIVE_PHOSPHORYLATION	HALLMARK_OXIDATIVE_PHOSPHORYLATION	4/110	155/2342	0.942261	0.989058	0.847418	Mpc1/Aldh6a1/Nqo2/Idh2	4	HALLMARK	up	NP
HALLMARK_COMPLEMENT	HALLMARK_COMPLEMENT	HALLMARK_COMPLEMENT	2/110	113/2342	0.973947	0.989058	0.847418	Ctsl/Cd36	2	HALLMARK	up	NP
HALLMARK_UNFOLDED_PROTEIN_RESPONSE	HALLMARK_UNFOLDED_PROTEIN_RESPONSE	HALLMARK_UNFOLDED_PROTEIN_RESPONSE	1/110	76/2342	0.975705	0.989058	0.847418	Igfbp1	1	HALLMARK	up	NP
HALLMARK_INTERFERON_GAMMA_RESPONSE	HALLMARK_INTERFERON_GAMMA_RESPONSE	HALLMARK_INTERFERON_GAMMA_RESPONSE	2/110	116/2342	0.977083	0.989058	0.847418	Arl4a/Btg1	2	HALLMARK	up	NP
HALLMARK_MITOTIC_SPINDLE	HALLMARK_MITOTIC_SPINDLE	HALLMARK_MITOTIC_SPINDLE	2/110	133/2342	0.989058	0.989058	0.847418	Rapgef5/Bcl2l11	2	HALLMARK	up	NP
REACTOME_BIOLOGICAL_OXIDATIONS	REACTOME_BIOLOGICAL_OXIDATIONS	REACTOME_BIOLOGICAL_OXIDATIONS	19/167	98/4668	8.9322e-10	4.12668e-07	3.91136e-07	Mat1a/Sult1a1/Mgst1/Cyp3a25/Gsta3/Cyp8b1/Ahcy/Papss2/Ces1d/Fmo1/Cmbl/Cyp27a1/Cyp3a11/Gstm1/Cyp7a1/Ahr/Gstt2/Nqo2/Cyp2a5	19	REACTOME	up	NP
REACTOME_SULFUR_AMINO_ACID_METABOLISM	REACTOME_SULFUR_AMINO_ACID_METABOLISM	REACTOME_SULFUR_AMINO_ACID_METABOLISM	8/167	16/4668	2.29093e-08	4.27055e-06	4.04773e-06	Bhmt/Mat1a/Cth/Cdo1/Bhmt2/Ahcy/Got1/Csad	8	REACTOME	up	NP
REACTOME_METABOLISM_OF_AMINO_ACIDS_AND_DERIVATIVES	REACTOME_METABOLISM_OF_AMINO_ACIDS_AND_DERIVATIVES	REACTOME_METABOLISM_OF_AMINO_ACIDS_AND_DERIVATIVES	29/167	262/4668	2.77308e-08	4.27055e-06	4.04773e-06	Bhmt/Mat1a/Dmgdh/Cth/Gnmt/Cdo1/Pah/Dhtkd1/Bhmt2/Ahcy/Psmd9/Ppm1k/Rida/Papss2/Afmid/Amdhd1/Aldh6a1/Hal/Agxt/Got1/Inmt/Ivd/Pxmp2/Csad/Mccc2/Gamt/Rps23/Iyd/Rpl7	29	REACTOME	up	NP
REACTOME_PHASE_I_FUNCTIONALIZATION_OF_COMPOUNDS	REACTOME_PHASE_I_FUNCTIONALIZATION_OF_COMPOUNDS	REACTOME_PHASE_I_FUNCTIONALIZATION_OF_COMPOUNDS	11/167	54/4668	2.22598e-06	0.000257101	0.000243687	Cyp3a25/Cyp8b1/Ces1d/Fmo1/Cmbl/Cyp27a1/Cyp3a11/Cyp7a1/Ahr/Nqo2/Cyp2a5	11	REACTOME	up	NP
REACTOME_CYTOCHROME_P450_ARRANGED_BY_SUBSTRATE_TYPE	REACTOME_CYTOCHROME_P450_ARRANGED_BY_SUBSTRATE_TYPE	REACTOME_CYTOCHROME_P450_ARRANGED_BY_SUBSTRATE_TYPE	7/167	31/4668	8.41279e-05	0.00683473	0.00647812	Cyp3a25/Cyp8b1/Cyp27a1/Cyp3a11/Cyp7a1/Ahr/Cyp2a5	7	REACTOME	up	NP
REACTOME_FORMATION_OF_FIBRIN_CLOT_CLOTTING_CASCADE	REACTOME_FORMATION_OF_FIBRIN_CLOT_CLOTTING_CASCADE	REACTOME_FORMATION_OF_FIBRIN_CLOT_CLOTTING_CASCADE	6/167	22/4668	8.87627e-05	0.00683473	0.00647812	Fgg/Kng2/Fgb/Fga/F11/F13b	6	REACTOME	up	NP
REACTOME_BILE_ACID_AND_BILE_SALT_METABOLISM	REACTOME_BILE_ACID_AND_BILE_SALT_METABOLISM	REACTOME_BILE_ACID_AND_BILE_SALT_METABOLISM	7/167	32/4668	0.000104475	0.00689538	0.00653561	Abcc3/Akr1d1/Cyp8b1/Stard5/Cyp27a1/Cyp7a1/Osbpl3	7	REACTOME	up	NP
REACTOME_PHASE_II_CONJUGATION_OF_COMPOUNDS	REACTOME_PHASE_II_CONJUGATION_OF_COMPOUNDS	REACTOME_PHASE_II_CONJUGATION_OF_COMPOUNDS	8/167	44/4668	0.000133756	0.00772443	0.0073214	Mat1a/Sult1a1/Mgst1/Gsta3/Ahcy/Papss2/Gstm1/Gstt2	8	REACTOME	up	NP
REACTOME_REGULATION_OF_INSULIN_LIKE_GROWTH_FACTOR_IGF_TRANSPORT_AND_UPTAKE_BY_INSULIN_LIKE_GROWTH_FACTOR_BINDING_PROTEINS_IGFBPS	REACTOME_REGULATION_OF_INSULIN_LIKE_GROWTH_FACTOR_IGF_TRANSPORT_AND_UPTAKE_BY_INSULIN_LIKE_GROWTH_FACTOR_BINDING_PROTEINS_IGFBPS	REACTOME_REGULATION_OF_INSULIN_LIKE_GROWTH_FACTOR_IGF_TRANSPORT_AND_UPTAKE_BY_INSULIN_LIKE_GROWTH_FACTOR_BINDING_PROTEINS_IGFBPS	9/167	57/4668	0.000158717	0.00814749	0.00772239	Apoa2/Fgg/Kng2/Apoe/Trf/Igfbp1/Fga/Igfbp2/Cst3	9	REACTOME	up	NP
REACTOME_CLASS_A_1_RHODOPSIN_LIKE_RECEPTORS	REACTOME_CLASS_A_1_RHODOPSIN_LIKE_RECEPTORS	REACTOME_CLASS_A_1_RHODOPSIN_LIKE_RECEPTORS	6/167	26/4668	0.000243124	0.0112323	0.0106463	Kng2/Plppr1/Cxcl12/Agt/Sucnr1/Adra1a	6	REACTOME	up	NP
REACTOME_REGULATION_OF_TLR_BY_ENDOGENOUS_LIGAND	REACTOME_REGULATION_OF_TLR_BY_ENDOGENOUS_LIGAND	REACTOME_REGULATION_OF_TLR_BY_ENDOGENOUS_LIGAND	4/167	4668-11-01	0.000428317	0.0164902	0.0156298	Fgg/Fgb/Fga/Cd36	4	REACTOME	up	NP
REACTOME_XENOBIOTICS	REACTOME_XENOBIOTICS	REACTOME_XENOBIOTICS	4/167	4668-11-01	0.000428317	0.0164902	0.0156298	Cyp3a25/Cyp3a11/Ahr/Cyp2a5	4	REACTOME	up	NP
REACTOME_SYNTHESIS_OF_BILE_ACIDS_AND_BILE_SALTS_VIA_27_HYDROXYCHOLESTEROL	REACTOME_SYNTHESIS_OF_BILE_ACIDS_AND_BILE_SALTS_VIA_27_HYDROXYCHOLESTEROL	REACTOME_SYNTHESIS_OF_BILE_ACIDS_AND_BILE_SALTS_VIA_27_HYDROXYCHOLESTEROL	4/167	4668-12-01	0.000624644	0.0221989	0.0210406	Akr1d1/Cyp8b1/Cyp27a1/Cyp7a1	4	REACTOME	up	NP
REACTOME_COMMON_PATHWAY_OF_FIBRIN_CLOT_FORMATION	REACTOME_COMMON_PATHWAY_OF_FIBRIN_CLOT_FORMATION	REACTOME_COMMON_PATHWAY_OF_FIBRIN_CLOT_FORMATION	4/167	13/4668	0.00087725	0.0270193	0.0256095	Fgg/Fgb/Fga/F13b	4	REACTOME	up	NP
REACTOME_GLUTATHIONE_CONJUGATION	REACTOME_GLUTATHIONE_CONJUGATION	REACTOME_GLUTATHIONE_CONJUGATION	4/167	13/4668	0.00087725	0.0270193	0.0256095	Mgst1/Gsta3/Gstm1/Gstt2	4	REACTOME	up	NP
REACTOME_RESPONSE_TO_ELEVATED_PLATELET_CYTOSOLIC_CA2	REACTOME_RESPONSE_TO_ELEVATED_PLATELET_CYTOSOLIC_CA2	REACTOME_RESPONSE_TO_ELEVATED_PLATELET_CYTOSOLIC_CA2	10/167	87/4668	0.000969233	0.0279866	0.0265264	Fgg/Kng2/Fgb/Trf/Fga/Apoh/Rarres2/Serpina3n/Cd36/Tmsb4x	10	REACTOME	up	NP
REACTOME_ENDOGENOUS_STEROLS	REACTOME_ENDOGENOUS_STEROLS	REACTOME_ENDOGENOUS_STEROLS	4/167	15/4668	0.00158332	0.0430292	0.0407841	Cyp8b1/Cyp27a1/Cyp7a1/Ahr	4	REACTOME	up	NP
REACTOME_SYNTHESIS_OF_BILE_ACIDS_AND_BILE_SALTS	REACTOME_SYNTHESIS_OF_BILE_ACIDS_AND_BILE_SALTS	REACTOME_SYNTHESIS_OF_BILE_ACIDS_AND_BILE_SALTS	5/167	26/4668	0.00197103	0.0505897	0.0479502	Akr1d1/Cyp8b1/Cyp27a1/Cyp7a1/Osbpl3	5	REACTOME	up	NP
REACTOME_METABOLISM_OF_STEROIDS	REACTOME_METABOLISM_OF_STEROIDS	REACTOME_METABOLISM_OF_STEROIDS	10/167	99/4668	0.00260893	0.0602978	0.0571517	Abcc3/Akr1d1/Scd1/Cyp8b1/Insig1/Stard5/Cyp27a1/Cyp7a1/Osbpl3/Hmgcs1	10	REACTOME	up	NP
REACTOME_DISEASES_OF_IMMUNE_SYSTEM	REACTOME_DISEASES_OF_IMMUNE_SYSTEM	REACTOME_DISEASES_OF_IMMUNE_SYSTEM	4/167	17/4668	0.0026103	0.0602978	0.0571517	Fgg/Fgb/Fga/Cd36	4	REACTOME	up	NP
REACTOME_BRANCHED_CHAIN_AMINO_ACID_CATABOLISM	REACTOME_BRANCHED_CHAIN_AMINO_ACID_CATABOLISM	REACTOME_BRANCHED_CHAIN_AMINO_ACID_CATABOLISM	4/167	18/4668	0.00326357	0.0717985	0.0680524	Ppm1k/Aldh6a1/Ivd/Mccc2	4	REACTOME	up	NP
REACTOME_SYNTHESIS_OF_BILE_ACIDS_AND_BILE_SALTS_VIA_24_HYDROXYCHOLESTEROL	REACTOME_SYNTHESIS_OF_BILE_ACIDS_AND_BILE_SALTS_VIA_24_HYDROXYCHOLESTEROL	REACTOME_SYNTHESIS_OF_BILE_ACIDS_AND_BILE_SALTS_VIA_24_HYDROXYCHOLESTEROL	3/167	4668-10-01	0.00448284	0.0941397	0.0892279	Akr1d1/Cyp8b1/Cyp27a1	3	REACTOME	up	NP
REACTOME_SYNTHESIS_OF_BILE_ACIDS_AND_BILE_SALTS_VIA_7ALPHA_HYDROXYCHOLESTEROL	REACTOME_SYNTHESIS_OF_BILE_ACIDS_AND_BILE_SALTS_VIA_7ALPHA_HYDROXYCHOLESTEROL	REACTOME_SYNTHESIS_OF_BILE_ACIDS_AND_BILE_SALTS_VIA_7ALPHA_HYDROXYCHOLESTEROL	4/167	20/4668	0.00488681	0.0943601	0.0894368	Akr1d1/Cyp8b1/Cyp27a1/Cyp7a1	4	REACTOME	up	NP
REACTOME_GPCR_LIGAND_BINDING	REACTOME_GPCR_LIGAND_BINDING	REACTOME_GPCR_LIGAND_BINDING	6/167	45/4668	0.00490182	0.0943601	0.0894368	Kng2/Plppr1/Cxcl12/Agt/Sucnr1/Adra1a	6	REACTOME	up	NP
REACTOME_REGULATION_OF_LIPID_METABOLISM_BY_PPARALPHA	REACTOME_REGULATION_OF_LIPID_METABOLISM_BY_PPARALPHA	REACTOME_REGULATION_OF_LIPID_METABOLISM_BY_PPARALPHA	9/167	92/4668	0.00525034	0.0970263	0.0919639	Apoa2/Cyp7a1/Ahr/Agt/Cd36/Ppargc1b/Hmgcs1/Pparg/Npas2	9	REACTOME	up	NP
REACTOME_GRB2_SOS_PROVIDES_LINKAGE_TO_MAPK_SIGNALING_FOR_INTEGRINS	REACTOME_GRB2_SOS_PROVIDES_LINKAGE_TO_MAPK_SIGNALING_FOR_INTEGRINS	REACTOME_GRB2_SOS_PROVIDES_LINKAGE_TO_MAPK_SIGNALING_FOR_INTEGRINS	3/167	4668-12-01	0.00779617	0.133401	0.126441	Fgg/Fgb/Fga	3	REACTOME	up	NP
REACTOME_P130CAS_LINKAGE_TO_MAPK_SIGNALING_FOR_INTEGRINS	REACTOME_P130CAS_LINKAGE_TO_MAPK_SIGNALING_FOR_INTEGRINS	REACTOME_P130CAS_LINKAGE_TO_MAPK_SIGNALING_FOR_INTEGRINS	3/167	4668-12-01	0.00779617	0.133401	0.126441	Fgg/Fgb/Fga	3	REACTOME	up	NP
REACTOME_GLYOXYLATE_METABOLISM_AND_GLYCINE_DEGRADATION	REACTOME_GLYOXYLATE_METABOLISM_AND_GLYCINE_DEGRADATION	REACTOME_GLYOXYLATE_METABOLISM_AND_GLYCINE_DEGRADATION	4/167	25/4668	0.0111039	0.183214	0.173655	Gnmt/Dhtkd1/Agxt/Pxmp2	4	REACTOME	up	NP
REACTOME_DISEASES_OF_METABOLISM	REACTOME_DISEASES_OF_METABOLISM	REACTOME_DISEASES_OF_METABOLISM	9/167	105/4668	0.012234	0.1949	0.184731	Mat1a/Pcx/Pah/Ahcy/Papss2/Cyp27a1/Mccc2/Mmut/Dcn	9	REACTOME	up	NP
REACTOME_NR1H2_AND_NR1H3_MEDIATED_SIGNALING	REACTOME_NR1H2_AND_NR1H3_MEDIATED_SIGNALING	REACTOME_NR1H2_AND_NR1H3_MEDIATED_SIGNALING	5/167	40/4668	0.0131811	0.202496	0.19193	Apoe/Scd1/Angptl3/Eepd1/Pltp	5	REACTOME	up	NP
REACTOME_SIGNALING_BY_NUCLEAR_RECEPTORS	REACTOME_SIGNALING_BY_NUCLEAR_RECEPTORS	REACTOME_SIGNALING_BY_NUCLEAR_RECEPTORS	11/167	145/4668	0.0140805	0.202496	0.19193	Apoe/Scd1/H3f3b/Fkbp5/Angptl3/Pdk1/Cxcl12/Jun/Eepd1/Pltp/Jund	11	REACTOME	up	NP
REACTOME_DEFECTS_IN_VITAMIN_AND_COFACTOR_METABOLISM	REACTOME_DEFECTS_IN_VITAMIN_AND_COFACTOR_METABOLISM	REACTOME_DEFECTS_IN_VITAMIN_AND_COFACTOR_METABOLISM	3/167	15/4668	0.0149023	0.202496	0.19193	Pcx/Mccc2/Mmut	3	REACTOME	up	NP
REACTOME_DISEASES_OF_DNA_REPAIR	REACTOME_DISEASES_OF_DNA_REPAIR	REACTOME_DISEASES_OF_DNA_REPAIR	3/167	15/4668	0.0149023	0.202496	0.19193	Blm/Rad51b/Msh2	3	REACTOME	up	NP
REACTOME_METABOLIC_DISORDERS_OF_BIOLOGICAL_OXIDATION_ENZYMES	REACTOME_METABOLIC_DISORDERS_OF_BIOLOGICAL_OXIDATION_ENZYMES	REACTOME_METABOLIC_DISORDERS_OF_BIOLOGICAL_OXIDATION_ENZYMES	3/167	15/4668	0.0149023	0.202496	0.19193	Mat1a/Ahcy/Cyp27a1	3	REACTOME	up	NP
REACTOME_PLASMA_LIPOPROTEIN_REMODELING	REACTOME_PLASMA_LIPOPROTEIN_REMODELING	REACTOME_PLASMA_LIPOPROTEIN_REMODELING	4/167	30/4668	0.0209527	0.271258	0.257105	Apoa2/Apoe/Angptl3/Pltp	4	REACTOME	up	NP
REACTOME_NUCLEOTIDE_CATABOLISM	REACTOME_NUCLEOTIDE_CATABOLISM	REACTOME_NUCLEOTIDE_CATABOLISM	3/167	17/4668	0.021137	0.271258	0.257105	Upp2/Nt5c3/Nt5e	3	REACTOME	up	NP
REACTOME_AMYLOID_FIBER_FORMATION	REACTOME_AMYLOID_FIBER_FORMATION	REACTOME_AMYLOID_FIBER_FORMATION	4/167	31/4668	0.023404	0.28542	0.270528	Apoe/Fga/H3f3b/Cst3	4	REACTOME	up	NP
REACTOME_TOLL_LIKE_RECEPTOR_TLR1_TLR2_CASCADE	REACTOME_TOLL_LIKE_RECEPTOR_TLR1_TLR2_CASCADE	REACTOME_TOLL_LIKE_RECEPTOR_TLR1_TLR2_CASCADE	6/167	63/4668	0.024156	0.28542	0.270528	Fgg/Fgb/Fga/Map2k6/Cd36/Jun	6	REACTOME	up	NP
REACTOME_NUCLEAR_SIGNALING_BY_ERBB4	REACTOME_NUCLEAR_SIGNALING_BY_ERBB4	REACTOME_NUCLEAR_SIGNALING_BY_ERBB4	3/167	18/4668	0.0247117	0.28542	0.270528	Apoe/Psen2/Cxcl12	3	REACTOME	up	NP
REACTOME_PEPTIDE_LIGAND_BINDING_RECEPTORS	REACTOME_PEPTIDE_LIGAND_BINDING_RECEPTORS	REACTOME_PEPTIDE_LIGAND_BINDING_RECEPTORS	3/167	18/4668	0.0247117	0.28542	0.270528	Kng2/Cxcl12/Agt	3	REACTOME	up	NP
REACTOME_SELENOAMINO_ACID_METABOLISM	REACTOME_SELENOAMINO_ACID_METABOLISM	REACTOME_SELENOAMINO_ACID_METABOLISM	8/167	104/4668	0.031744	0.357701	0.339038	Mat1a/Cth/Gnmt/Ahcy/Papss2/Inmt/Rps23/Rpl7	8	REACTOME	up	NP
REACTOME_INTEGRIN_SIGNALING	REACTOME_INTEGRIN_SIGNALING	REACTOME_INTEGRIN_SIGNALING	3/167	22/4668	0.0420395	0.4599	0.435905	Fgg/Fgb/Fga	3	REACTOME	up	NP
REACTOME_ANTIGEN_PROCESSING_CROSS_PRESENTATION	REACTOME_ANTIGEN_PROCESSING_CROSS_PRESENTATION	REACTOME_ANTIGEN_PROCESSING_CROSS_PRESENTATION	6/167	72/4668	0.0428046	0.4599	0.435905	Fgg/Ctsl/Fgb/Fga/Psmd9/Cd36	6	REACTOME	up	NP
REACTOME_ARACHIDONIC_ACID_METABOLISM	REACTOME_ARACHIDONIC_ACID_METABOLISM	REACTOME_ARACHIDONIC_ACID_METABOLISM	3/167	23/4668	0.047113	0.476117	0.451275	Pon1/Cyp8b1/Hpgd	3	REACTOME	up	NP
REACTOME_CHYLOMICRON_ASSEMBLY	REACTOME_CHYLOMICRON_ASSEMBLY	REACTOME_CHYLOMICRON_ASSEMBLY	2/167	4668-10-01	0.0474055	0.476117	0.451275	Apoa2/Apoe	2	REACTOME	up	NP
REACTOME_METHYLATION	REACTOME_METHYLATION	REACTOME_METHYLATION	2/167	4668-10-01	0.0474055	0.476117	0.451275	Mat1a/Ahcy	2	REACTOME	up	NP
REACTOME_PLATELET_AGGREGATION_PLUG_FORMATION	REACTOME_PLATELET_AGGREGATION_PLUG_FORMATION	REACTOME_PLATELET_AGGREGATION_PLUG_FORMATION	3/167	24/4668	0.0524735	0.505389	0.47902	Fgg/Fgb/Fga	3	REACTOME	up	NP
REACTOME_TOLL_LIKE_RECEPTOR_CASCADES	REACTOME_TOLL_LIKE_RECEPTOR_CASCADES	REACTOME_TOLL_LIKE_RECEPTOR_CASCADES	7/167	95/4668	0.0525079	0.505389	0.47902	Fgg/Ctsl/Fgb/Fga/Map2k6/Cd36/Jun	7	REACTOME	up	NP
REACTOME_INTERLEUKIN_4_AND_INTERLEUKIN_13_SIGNALING	REACTOME_INTERLEUKIN_4_AND_INTERLEUKIN_13_SIGNALING	REACTOME_INTERLEUKIN_4_AND_INTERLEUKIN_13_SIGNALING	4/167	41/4668	0.0573233	0.529668	0.502032	Cd36/Junb/Cebpd/Il18	4	REACTOME	up	NP
REACTOME_METABOLISM_OF_NUCLEOTIDES	REACTOME_METABOLISM_OF_NUCLEOTIDES	REACTOME_METABOLISM_OF_NUCLEOTIDES	4/167	41/4668	0.0573233	0.529668	0.502032	Upp2/Paics/Nt5c3/Nt5e	4	REACTOME	up	NP
REACTOME_PLATELET_ACTIVATION_SIGNALING_AND_AGGREGATION	REACTOME_PLATELET_ACTIVATION_SIGNALING_AND_AGGREGATION	REACTOME_PLATELET_ACTIVATION_SIGNALING_AND_AGGREGATION	10/167	160/4668	0.0593866	0.537972	0.509903	Fgg/Kng2/Fgb/Trf/Fga/Apoh/Rarres2/Serpina3n/Cd36/Tmsb4x	10	REACTOME	up	NP
REACTOME_MEIOTIC_RECOMBINATION	REACTOME_MEIOTIC_RECOMBINATION	REACTOME_MEIOTIC_RECOMBINATION	2/167	4668-12-01	0.066368	0.578529	0.548343	H3f3b/Blm	2	REACTOME	up	NP
REACTOME_RESOLUTION_OF_D_LOOP_STRUCTURES_THROUGH_SYNTHESIS_DEPENDENT_STRAND_ANNEALING_SDSA	REACTOME_RESOLUTION_OF_D_LOOP_STRUCTURES_THROUGH_SYNTHESIS_DEPENDENT_STRAND_ANNEALING_SDSA	REACTOME_RESOLUTION_OF_D_LOOP_STRUCTURES_THROUGH_SYNTHESIS_DEPENDENT_STRAND_ANNEALING_SDSA	2/167	4668-12-01	0.066368	0.578529	0.548343	Blm/Rad51b	2	REACTOME	up	NP
REACTOME_FOXO_MEDIATED_TRANSCRIPTION_OF_CELL_DEATH_GENES	REACTOME_FOXO_MEDIATED_TRANSCRIPTION_OF_CELL_DEATH_GENES	REACTOME_FOXO_MEDIATED_TRANSCRIPTION_OF_CELL_DEATH_GENES	2/167	13/4668	0.07664	0.621287	0.588871	Cited2/Bcl2l11	2	REACTOME	up	NP
REACTOME_RECYCLING_OF_BILE_ACIDS_AND_SALTS	REACTOME_RECYCLING_OF_BILE_ACIDS_AND_SALTS	REACTOME_RECYCLING_OF_BILE_ACIDS_AND_SALTS	2/167	13/4668	0.07664	0.621287	0.588871	Abcc3/Stard5	2	REACTOME	up	NP
REACTOME_RESOLUTION_OF_D_LOOP_STRUCTURES	REACTOME_RESOLUTION_OF_D_LOOP_STRUCTURES	REACTOME_RESOLUTION_OF_D_LOOP_STRUCTURES	2/167	13/4668	0.07664	0.621287	0.588871	Blm/Rad51b	2	REACTOME	up	NP
REACTOME_MEIOSIS	REACTOME_MEIOSIS	REACTOME_MEIOSIS	3/167	28/4668	0.0766523	0.621287	0.588871	H3f3b/Blm/Syne1	3	REACTOME	up	NP
REACTOME_FOXO_MEDIATED_TRANSCRIPTION	REACTOME_FOXO_MEDIATED_TRANSCRIPTION	REACTOME_FOXO_MEDIATED_TRANSCRIPTION	4/167	46/4668	0.0806949	0.642777	0.609239	Igfbp1/Btg1/Cited2/Bcl2l11	4	REACTOME	up	NP
REACTOME_DISEASES_OF_PROGRAMMED_CELL_DEATH	REACTOME_DISEASES_OF_PROGRAMMED_CELL_DEATH	REACTOME_DISEASES_OF_PROGRAMMED_CELL_DEATH	3/167	29/4668	0.0833431	0.651075	0.617104	H3f3b/Jun/Bcl2l11	3	REACTOME	up	NP
REACTOME_G_ALPHA_I_SIGNALLING_EVENTS	REACTOME_G_ALPHA_I_SIGNALLING_EVENTS	REACTOME_G_ALPHA_I_SIGNALLING_EVENTS	5/167	66/4668	0.0859564	0.651075	0.617104	Kng2/Rgs16/Cxcl12/Agt/Sucnr1	5	REACTOME	up	NP
REACTOME_DEFECTIVE_INTRINSIC_PATHWAY_FOR_APOPTOSIS	REACTOME_DEFECTIVE_INTRINSIC_PATHWAY_FOR_APOPTOSIS	REACTOME_DEFECTIVE_INTRINSIC_PATHWAY_FOR_APOPTOSIS	2/167	14/4668	0.0873736	0.651075	0.617104	Jun/Bcl2l11	2	REACTOME	up	NP
REACTOME_INTRINSIC_PATHWAY_OF_FIBRIN_CLOT_FORMATION	REACTOME_INTRINSIC_PATHWAY_OF_FIBRIN_CLOT_FORMATION	REACTOME_INTRINSIC_PATHWAY_OF_FIBRIN_CLOT_FORMATION	2/167	14/4668	0.0873736	0.651075	0.617104	Kng2/F11	2	REACTOME	up	NP
REACTOME_MAP2K_AND_MAPK_ACTIVATION	REACTOME_MAP2K_AND_MAPK_ACTIVATION	REACTOME_MAP2K_AND_MAPK_ACTIVATION	3/167	30/4668	0.0902753	0.662019	0.627478	Fgg/Fgb/Fga	3	REACTOME	up	NP
REACTOME_PURINERGIC_SIGNALING_IN_LEISHMANIASIS_INFECTION	REACTOME_PURINERGIC_SIGNALING_IN_LEISHMANIASIS_INFECTION	REACTOME_PURINERGIC_SIGNALING_IN_LEISHMANIASIS_INFECTION	2/167	15/4668	0.0985231	0.701927	0.665304	Il18/Nt5e	2	REACTOME	up	NP
REACTOME_METABOLISM_OF_VITAMINS_AND_COFACTORS	REACTOME_METABOLISM_OF_VITAMINS_AND_COFACTORS	REACTOME_METABOLISM_OF_VITAMINS_AND_COFACTORS	7/167	111/4668	0.101335	0.701927	0.665304	Apoa2/Apoe/Pcx/Cyp8b1/Mccc2/Mmut/Nt5e	7	REACTOME	up	NP
REACTOME_METABOLISM_OF_WATER_SOLUBLE_VITAMINS_AND_COFACTORS	REACTOME_METABOLISM_OF_WATER_SOLUBLE_VITAMINS_AND_COFACTORS	REACTOME_METABOLISM_OF_WATER_SOLUBLE_VITAMINS_AND_COFACTORS	5/167	70/4668	0.104173	0.701927	0.665304	Pcx/Cyp8b1/Mccc2/Mmut/Nt5e	5	REACTOME	up	NP
REACTOME_REPRODUCTION	REACTOME_REPRODUCTION	REACTOME_REPRODUCTION	3/167	32/4668	0.104828	0.701927	0.665304	H3f3b/Blm/Syne1	3	REACTOME	up	NP
REACTOME_SIGNALING_BY_BRAF_AND_RAF1_FUSIONS	REACTOME_SIGNALING_BY_BRAF_AND_RAF1_FUSIONS	REACTOME_SIGNALING_BY_BRAF_AND_RAF1_FUSIONS	4/167	51/4668	0.108064	0.701927	0.665304	Fgg/Fgb/Fga/Bcl2l11	4	REACTOME	up	NP
REACTOME_HOMOLOGOUS_DNA_PAIRING_AND_STRAND_EXCHANGE	REACTOME_HOMOLOGOUS_DNA_PAIRING_AND_STRAND_EXCHANGE	REACTOME_HOMOLOGOUS_DNA_PAIRING_AND_STRAND_EXCHANGE	2/167	16/4668	0.110045	0.701927	0.665304	Blm/Rad51b	2	REACTOME	up	NP
REACTOME_NGF_STIMULATED_TRANSCRIPTION	REACTOME_NGF_STIMULATED_TRANSCRIPTION	REACTOME_NGF_STIMULATED_TRANSCRIPTION	2/167	16/4668	0.110045	0.701927	0.665304	Junb/Jund	2	REACTOME	up	NP
REACTOME_PLASMA_LIPOPROTEIN_ASSEMBLY	REACTOME_PLASMA_LIPOPROTEIN_ASSEMBLY	REACTOME_PLASMA_LIPOPROTEIN_ASSEMBLY	2/167	16/4668	0.110045	0.701927	0.665304	Apoa2/Apoe	2	REACTOME	up	NP
REACTOME_SIALIC_ACID_METABOLISM	REACTOME_SIALIC_ACID_METABOLISM	REACTOME_SIALIC_ACID_METABOLISM	2/167	16/4668	0.110045	0.701927	0.665304	St6gal1/Neu2	2	REACTOME	up	NP
REACTOME_NR1H3_NR1H2_REGULATE_GENE_EXPRESSION_LINKED_TO_CHOLESTEROL_TRANSPORT_AND_EFFLUX	REACTOME_NR1H3_NR1H2_REGULATE_GENE_EXPRESSION_LINKED_TO_CHOLESTEROL_TRANSPORT_AND_EFFLUX	REACTOME_NR1H3_NR1H2_REGULATE_GENE_EXPRESSION_LINKED_TO_CHOLESTEROL_TRANSPORT_AND_EFFLUX	3/167	33/4668	0.11243	0.701927	0.665304	Apoe/Eepd1/Pltp	3	REACTOME	up	NP
REACTOME_SIGNALING_BY_ERBB4	REACTOME_SIGNALING_BY_ERBB4	REACTOME_SIGNALING_BY_ERBB4	3/167	33/4668	0.11243	0.701927	0.665304	Apoe/Psen2/Cxcl12	3	REACTOME	up	NP
REACTOME_PEPTIDE_HORMONE_METABOLISM	REACTOME_PEPTIDE_HORMONE_METABOLISM	REACTOME_PEPTIDE_HORMONE_METABOLISM	3/167	34/4668	0.120236	0.740653	0.702008	Ces1d/Bche/Agt	3	REACTOME	up	NP
REACTOME_SIGNALING_BY_MODERATE_KINASE_ACTIVITY_BRAF_MUTANTS	REACTOME_SIGNALING_BY_MODERATE_KINASE_ACTIVITY_BRAF_MUTANTS	REACTOME_SIGNALING_BY_MODERATE_KINASE_ACTIVITY_BRAF_MUTANTS	3/167	35/4668	0.128236	0.768615	0.728512	Fgg/Fgb/Fga	3	REACTOME	up	NP
REACTOME_TRANSCRIPTIONAL_REGULATION_OF_WHITE_ADIPOCYTE_DIFFERENTIATION	REACTOME_TRANSCRIPTIONAL_REGULATION_OF_WHITE_ADIPOCYTE_DIFFERENTIATION	REACTOME_TRANSCRIPTIONAL_REGULATION_OF_WHITE_ADIPOCYTE_DIFFERENTIATION	4/167	55/4668	0.132574	0.768615	0.728512	Ccnd3/Cd36/Pparg/Cebpd	4	REACTOME	up	NP
REACTOME_GLUCONEOGENESIS	REACTOME_GLUCONEOGENESIS	REACTOME_GLUCONEOGENESIS	2/167	18/4668	0.134048	0.768615	0.728512	Pcx/Got1	2	REACTOME	up	NP
REACTOME_RNA_POLYMERASE_I_PROMOTER_ESCAPE	REACTOME_RNA_POLYMERASE_I_PROMOTER_ESCAPE	REACTOME_RNA_POLYMERASE_I_PROMOTER_ESCAPE	2/167	18/4668	0.134048	0.768615	0.728512	H3f3b/Gtf2h5	2	REACTOME	up	NP
REACTOME_TRANSCRIPTIONAL_REGULATION_BY_THE_AP_2_TFAP2_FAMILY_OF_TRANSCRIPTION_FACTORS	REACTOME_TRANSCRIPTIONAL_REGULATION_BY_THE_AP_2_TFAP2_FAMILY_OF_TRANSCRIPTION_FACTORS	REACTOME_TRANSCRIPTIONAL_REGULATION_BY_THE_AP_2_TFAP2_FAMILY_OF_TRANSCRIPTION_FACTORS	2/167	18/4668	0.134048	0.768615	0.728512	Apoe/Cited2	2	REACTOME	up	NP
REACTOME_INTEGRIN_CELL_SURFACE_INTERACTIONS	REACTOME_INTEGRIN_CELL_SURFACE_INTERACTIONS	REACTOME_INTEGRIN_CELL_SURFACE_INTERACTIONS	3/167	36/4668	0.136421	0.768615	0.728512	Fgg/Fgb/Fga	3	REACTOME	up	NP
REACTOME_TP53_REGULATES_TRANSCRIPTION_OF_DNA_REPAIR_GENES	REACTOME_TP53_REGULATES_TRANSCRIPTION_OF_DNA_REPAIR_GENES	REACTOME_TP53_REGULATES_TRANSCRIPTION_OF_DNA_REPAIR_GENES	3/167	36/4668	0.136421	0.768615	0.728512	Jun/Gtf2h5/Msh2	3	REACTOME	up	NP
REACTOME_PYRUVATE_METABOLISM	REACTOME_PYRUVATE_METABOLISM	REACTOME_PYRUVATE_METABOLISM	2/167	19/4668	0.146455	0.815207	0.772673	Mpc1/Pdk1	2	REACTOME	up	NP
REACTOME_TRANSCRIPTIONAL_REGULATION_BY_MECP2	REACTOME_TRANSCRIPTIONAL_REGULATION_BY_MECP2	REACTOME_TRANSCRIPTIONAL_REGULATION_BY_MECP2	3/167	38/4668	0.153304	0.843174	0.79918	Fkbp5/Gamt/Pparg	3	REACTOME	up	NP
REACTOME_DISEASES_ASSOCIATED_WITH_GLYCOSAMINOGLYCAN_METABOLISM	REACTOME_DISEASES_ASSOCIATED_WITH_GLYCOSAMINOGLYCAN_METABOLISM	REACTOME_DISEASES_ASSOCIATED_WITH_GLYCOSAMINOGLYCAN_METABOLISM	2/167	20/4668	0.159086	0.845093	0.800999	Papss2/Dcn	2	REACTOME	up	NP
REACTOME_G_ALPHA_Q_SIGNALLING_EVENTS	REACTOME_G_ALPHA_Q_SIGNALLING_EVENTS	REACTOME_G_ALPHA_Q_SIGNALLING_EVENTS	4/167	59/4668	0.159141	0.845093	0.800999	Kng2/Rgs16/Agt/Adra1a	4	REACTOME	up	NP
REACTOME_PLASMA_LIPOPROTEIN_ASSEMBLY_REMODELING_AND_CLEARANCE	REACTOME_PLASMA_LIPOPROTEIN_ASSEMBLY_REMODELING_AND_CLEARANCE	REACTOME_PLASMA_LIPOPROTEIN_ASSEMBLY_REMODELING_AND_CLEARANCE	4/167	59/4668	0.159141	0.845093	0.800999	Apoa2/Apoe/Angptl3/Pltp	4	REACTOME	up	NP
REACTOME_NUCLEAR_RECEPTOR_TRANSCRIPTION_PATHWAY	REACTOME_NUCLEAR_RECEPTOR_TRANSCRIPTION_PATHWAY	REACTOME_NUCLEAR_RECEPTOR_TRANSCRIPTION_PATHWAY	3/167	39/4668	0.161983	0.850412	0.806041	Nr4a1/Pparg/Thra	3	REACTOME	up	NP
REACTOME_PYRUVATE_METABOLISM_AND_CITRIC_ACID_TCA_CYCLE	REACTOME_PYRUVATE_METABOLISM_AND_CITRIC_ACID_TCA_CYCLE	REACTOME_PYRUVATE_METABOLISM_AND_CITRIC_ACID_TCA_CYCLE	3/167	40/4668	0.170807	0.878862	0.833006	Mpc1/Pdk1/Idh2	3	REACTOME	up	NP
REACTOME_NICOTINATE_METABOLISM	REACTOME_NICOTINATE_METABOLISM	REACTOME_NICOTINATE_METABOLISM	2/167	21/4668	0.17191	0.878862	0.833006	Cyp8b1/Nt5e	2	REACTOME	up	NP
REACTOME_ONCOGENIC_MAPK_SIGNALING	REACTOME_ONCOGENIC_MAPK_SIGNALING	REACTOME_ONCOGENIC_MAPK_SIGNALING	4/167	61/4668	0.173109	0.878862	0.833006	Fgg/Fgb/Fga/Bcl2l11	4	REACTOME	up	NP
REACTOME_ESTROGEN_DEPENDENT_GENE_EXPRESSION	REACTOME_ESTROGEN_DEPENDENT_GENE_EXPRESSION	REACTOME_ESTROGEN_DEPENDENT_GENE_EXPRESSION	4/167	62/4668	0.180249	0.905162	0.857934	H3f3b/Cxcl12/Jun/Jund	4	REACTOME	up	NP
REACTOME_P75_NTR_RECEPTOR_MEDIATED_SIGNALLING	REACTOME_P75_NTR_RECEPTOR_MEDIATED_SIGNALLING	REACTOME_P75_NTR_RECEPTOR_MEDIATED_SIGNALLING	4/167	63/4668	0.187486	0.917664	0.869784	Arhgef37/Psen2/Rtn4/Bcl2l11	4	REACTOME	up	NP
REACTOME_EXTRACELLULAR_MATRIX_ORGANIZATION	REACTOME_EXTRACELLULAR_MATRIX_ORGANIZATION	REACTOME_EXTRACELLULAR_MATRIX_ORGANIZATION	6/167	108/4668	0.188697	0.917664	0.869784	Fgg/Ctsl/Fgb/Fga/Adam12/Dcn	6	REACTOME	up	NP
REACTOME_FATTY_ACID_METABOLISM	REACTOME_FATTY_ACID_METABOLISM	REACTOME_FATTY_ACID_METABOLISM	6/167	108/4668	0.188697	0.917664	0.869784	Pon1/Scd1/Cyp8b1/Hpgd/Mmut/Mcee	6	REACTOME	up	NP
REACTOME_MAPK_FAMILY_SIGNALING_CASCADES	REACTOME_MAPK_FAMILY_SIGNALING_CASCADES	REACTOME_MAPK_FAMILY_SIGNALING_CASCADES	9/167	180/4668	0.194191	0.93352	0.884813	Fgg/Fgb/Fga/Psmd9/Irs2/Klb/Ccnd3/Jun/Rasa3	9	REACTOME	up	NP
REACTOME_SMAD2_SMAD3_SMAD4_HETEROTRIMER_REGULATES_TRANSCRIPTION	REACTOME_SMAD2_SMAD3_SMAD4_HETEROTRIMER_REGULATES_TRANSCRIPTION	REACTOME_SMAD2_SMAD3_SMAD4_HETEROTRIMER_REGULATES_TRANSCRIPTION	2/167	23/4668	0.198019	0.93352	0.884813	Junb/Smad7	2	REACTOME	up	NP
REACTOME_TELOMERE_MAINTENANCE	REACTOME_TELOMERE_MAINTENANCE	REACTOME_TELOMERE_MAINTENANCE	2/167	23/4668	0.198019	0.93352	0.884813	H3f3b/Blm	2	REACTOME	up	NP
REACTOME_HDR_THROUGH_HOMOLOGOUS_RECOMBINATION_HRR	REACTOME_HDR_THROUGH_HOMOLOGOUS_RECOMBINATION_HRR	REACTOME_HDR_THROUGH_HOMOLOGOUS_RECOMBINATION_HRR	2/167	24/4668	0.211251	0.975979	0.925056	Blm/Rad51b	2	REACTOME	up	NP
REACTOME_SUMOYLATION_OF_INTRACELLULAR_RECEPTORS	REACTOME_SUMOYLATION_OF_INTRACELLULAR_RECEPTORS	REACTOME_SUMOYLATION_OF_INTRACELLULAR_RECEPTORS	2/167	24/4668	0.211251	0.975979	0.925056	Pparg/Thra	2	REACTOME	up	NP
REACTOME_OXIDATIVE_STRESS_INDUCED_SENESCENCE	REACTOME_OXIDATIVE_STRESS_INDUCED_SENESCENCE	REACTOME_OXIDATIVE_STRESS_INDUCED_SENESCENCE	3/167	46/4668	0.226258	0.988549	0.936971	H3f3b/Map2k6/Jun	3	REACTOME	up	NP
REACTOME_IRS_MEDIATED_SIGNALLING	REACTOME_IRS_MEDIATED_SIGNALLING	REACTOME_IRS_MEDIATED_SIGNALLING	2/167	26/4668	0.237945	0.988549	0.936971	Irs2/Klb	2	REACTOME	up	NP
REACTOME_REGULATION_OF_CHOLESTEROL_BIOSYNTHESIS_BY_SREBP_SREBF	REACTOME_REGULATION_OF_CHOLESTEROL_BIOSYNTHESIS_BY_SREBP_SREBF	REACTOME_REGULATION_OF_CHOLESTEROL_BIOSYNTHESIS_BY_SREBP_SREBF	3/167	48/4668	0.245474	0.988549	0.936971	Scd1/Insig1/Hmgcs1	3	REACTOME	up	NP
REACTOME_SIGNALING_BY_GPCR	REACTOME_SIGNALING_BY_GPCR	REACTOME_SIGNALING_BY_GPCR	8/167	167/4668	0.2472	0.988549	0.936971	Kng2/Rgs16/Arhgef37/Plppr1/Cxcl12/Agt/Sucnr1/Adra1a	8	REACTOME	up	NP
REACTOME_SYNTHESIS_OF_SUBSTRATES_IN_N_GLYCAN_BIOSYTHESIS	REACTOME_SYNTHESIS_OF_SUBSTRATES_IN_N_GLYCAN_BIOSYTHESIS	REACTOME_SYNTHESIS_OF_SUBSTRATES_IN_N_GLYCAN_BIOSYTHESIS	2/167	27/4668	0.251364	0.988549	0.936971	St6gal1/Neu2	2	REACTOME	up	NP
REACTOME_ESR_MEDIATED_SIGNALING	REACTOME_ESR_MEDIATED_SIGNALING	REACTOME_ESR_MEDIATED_SIGNALING	5/167	95/4668	0.252249	0.988549	0.936971	H3f3b/Fkbp5/Cxcl12/Jun/Jund	5	REACTOME	up	NP
REACTOME_CELL_DEATH_SIGNALLING_VIA_NRAGE_NRIF_AND_NADE	REACTOME_CELL_DEATH_SIGNALLING_VIA_NRAGE_NRIF_AND_NADE	REACTOME_CELL_DEATH_SIGNALLING_VIA_NRAGE_NRIF_AND_NADE	3/167	50/4668	0.264938	0.988549	0.936971	Arhgef37/Psen2/Bcl2l11	3	REACTOME	up	NP
REACTOME_NUCLEAR_EVENTS_KINASE_AND_TRANSCRIPTION_FACTOR_ACTIVATION	REACTOME_NUCLEAR_EVENTS_KINASE_AND_TRANSCRIPTION_FACTOR_ACTIVATION	REACTOME_NUCLEAR_EVENTS_KINASE_AND_TRANSCRIPTION_FACTOR_ACTIVATION	2/167	29/4668	0.278245	0.988549	0.936971	Junb/Jund	2	REACTOME	up	NP
REACTOME_SIGNALING_BY_TYPE_1_INSULIN_LIKE_GROWTH_FACTOR_1_RECEPTOR_IGF1R	REACTOME_SIGNALING_BY_TYPE_1_INSULIN_LIKE_GROWTH_FACTOR_1_RECEPTOR_IGF1R	REACTOME_SIGNALING_BY_TYPE_1_INSULIN_LIKE_GROWTH_FACTOR_1_RECEPTOR_IGF1R	2/167	29/4668	0.278245	0.988549	0.936971	Irs2/Klb	2	REACTOME	up	NP
REACTOME_BINDING_AND_UPTAKE_OF_LIGANDS_BY_SCAVENGER_RECEPTORS	REACTOME_BINDING_AND_UPTAKE_OF_LIGANDS_BY_SCAVENGER_RECEPTORS	REACTOME_BINDING_AND_UPTAKE_OF_LIGANDS_BY_SCAVENGER_RECEPTORS	2/167	30/4668	0.291671	0.988549	0.936971	Apoe/Cd36	2	REACTOME	up	NP
REACTOME_INSULIN_RECEPTOR_SIGNALLING_CASCADE	REACTOME_INSULIN_RECEPTOR_SIGNALLING_CASCADE	REACTOME_INSULIN_RECEPTOR_SIGNALLING_CASCADE	2/167	30/4668	0.291671	0.988549	0.936971	Irs2/Klb	2	REACTOME	up	NP
REACTOME_METABOLISM_OF_FAT_SOLUBLE_VITAMINS	REACTOME_METABOLISM_OF_FAT_SOLUBLE_VITAMINS	REACTOME_METABOLISM_OF_FAT_SOLUBLE_VITAMINS	2/167	30/4668	0.291671	0.988549	0.936971	Apoa2/Apoe	2	REACTOME	up	NP
REACTOME_MITOCHONDRIAL_FATTY_ACID_BETA_OXIDATION	REACTOME_MITOCHONDRIAL_FATTY_ACID_BETA_OXIDATION	REACTOME_MITOCHONDRIAL_FATTY_ACID_BETA_OXIDATION	2/167	30/4668	0.291671	0.988549	0.936971	Mmut/Mcee	2	REACTOME	up	NP
REACTOME_NEGATIVE_EPIGENETIC_REGULATION_OF_RRNA_EXPRESSION	REACTOME_NEGATIVE_EPIGENETIC_REGULATION_OF_RRNA_EXPRESSION	REACTOME_NEGATIVE_EPIGENETIC_REGULATION_OF_RRNA_EXPRESSION	2/167	30/4668	0.291671	0.988549	0.936971	H3f3b/Gtf2h5	2	REACTOME	up	NP
REACTOME_GLUCOSE_METABOLISM	REACTOME_GLUCOSE_METABOLISM	REACTOME_GLUCOSE_METABOLISM	3/167	53/4668	0.294458	0.988549	0.936971	Pcx/Pfkfb1/Got1	3	REACTOME	up	NP
REACTOME_CHROMOSOME_MAINTENANCE	REACTOME_CHROMOSOME_MAINTENANCE	REACTOME_CHROMOSOME_MAINTENANCE	2/167	31/4668	0.305066	0.988549	0.936971	H3f3b/Blm	2	REACTOME	up	NP
REACTOME_CONDENSATION_OF_PROPHASE_CHROMOSOMES	REACTOME_CONDENSATION_OF_PROPHASE_CHROMOSOMES	REACTOME_CONDENSATION_OF_PROPHASE_CHROMOSOMES	1/167	4668-10-01	0.305574	0.988549	0.936971	H3f3b	1	REACTOME	up	NP
REACTOME_DEFECTIVE_B4GALT7_CAUSES_EDS_PROGEROID_TYPE	REACTOME_DEFECTIVE_B4GALT7_CAUSES_EDS_PROGEROID_TYPE	REACTOME_DEFECTIVE_B4GALT7_CAUSES_EDS_PROGEROID_TYPE	1/167	4668-10-01	0.305574	0.988549	0.936971	Dcn	1	REACTOME	up	NP
REACTOME_ERYTHROPOIETIN_ACTIVATES_RAS	REACTOME_ERYTHROPOIETIN_ACTIVATES_RAS	REACTOME_ERYTHROPOIETIN_ACTIVATES_RAS	1/167	4668-10-01	0.305574	0.988549	0.936971	Irs2	1	REACTOME	up	NP
REACTOME_MECP2_REGULATES_NEURONAL_RECEPTORS_AND_CHANNELS	REACTOME_MECP2_REGULATES_NEURONAL_RECEPTORS_AND_CHANNELS	REACTOME_MECP2_REGULATES_NEURONAL_RECEPTORS_AND_CHANNELS	1/167	4668-10-01	0.305574	0.988549	0.936971	Fkbp5	1	REACTOME	up	NP
REACTOME_N_GLYCAN_ANTENNAE_ELONGATION_IN_THE_MEDIAL_TRANS_GOLGI	REACTOME_N_GLYCAN_ANTENNAE_ELONGATION_IN_THE_MEDIAL_TRANS_GOLGI	REACTOME_N_GLYCAN_ANTENNAE_ELONGATION_IN_THE_MEDIAL_TRANS_GOLGI	1/167	4668-10-01	0.305574	0.988549	0.936971	St6gal1	1	REACTOME	up	NP
REACTOME_OTHER_SEMAPHORIN_INTERACTIONS	REACTOME_OTHER_SEMAPHORIN_INTERACTIONS	REACTOME_OTHER_SEMAPHORIN_INTERACTIONS	1/167	4668-10-01	0.305574	0.988549	0.936971	Plxna2	1	REACTOME	up	NP
REACTOME_PROCESSING_AND_ACTIVATION_OF_SUMO	REACTOME_PROCESSING_AND_ACTIVATION_OF_SUMO	REACTOME_PROCESSING_AND_ACTIVATION_OF_SUMO	1/167	4668-10-01	0.305574	0.988549	0.936971	Rwdd3	1	REACTOME	up	NP
REACTOME_UPTAKE_AND_FUNCTION_OF_ANTHRAX_TOXINS	REACTOME_UPTAKE_AND_FUNCTION_OF_ANTHRAX_TOXINS	REACTOME_UPTAKE_AND_FUNCTION_OF_ANTHRAX_TOXINS	1/167	4668-10-01	0.305574	0.988549	0.936971	Map2k6	1	REACTOME	up	NP
REACTOME_PI3K_AKT_SIGNALING_IN_CANCER	REACTOME_PI3K_AKT_SIGNALING_IN_CANCER	REACTOME_PI3K_AKT_SIGNALING_IN_CANCER	3/167	55/4668	0.314263	0.988549	0.936971	Irs2/Klb/Nr4a1	3	REACTOME	up	NP
REACTOME_SENESCENCE_ASSOCIATED_SECRETORY_PHENOTYPE_SASP	REACTOME_SENESCENCE_ASSOCIATED_SECRETORY_PHENOTYPE_SASP	REACTOME_SENESCENCE_ASSOCIATED_SECRETORY_PHENOTYPE_SASP	2/167	32/4668	0.318415	0.988549	0.936971	H3f3b/Jun	2	REACTOME	up	NP
REACTOME_A_TETRASACCHARIDE_LINKER_SEQUENCE_IS_REQUIRED_FOR_GAG_SYNTHESIS	REACTOME_A_TETRASACCHARIDE_LINKER_SEQUENCE_IS_REQUIRED_FOR_GAG_SYNTHESIS	REACTOME_A_TETRASACCHARIDE_LINKER_SEQUENCE_IS_REQUIRED_FOR_GAG_SYNTHESIS	1/167	4668-11-01	0.330471	0.988549	0.936971	Dcn	1	REACTOME	up	NP
REACTOME_DEFECTS_OF_CONTACT_ACTIVATION_SYSTEM_CAS_AND_KALLIKREIN_KININ_SYSTEM_KKS	REACTOME_DEFECTS_OF_CONTACT_ACTIVATION_SYSTEM_CAS_AND_KALLIKREIN_KININ_SYSTEM_KKS	REACTOME_DEFECTS_OF_CONTACT_ACTIVATION_SYSTEM_CAS_AND_KALLIKREIN_KININ_SYSTEM_KKS	1/167	4668-11-01	0.330471	0.988549	0.936971	F11	1	REACTOME	up	NP
REACTOME_INTERLEUKIN_10_SIGNALING	REACTOME_INTERLEUKIN_10_SIGNALING	REACTOME_INTERLEUKIN_10_SIGNALING	1/167	4668-11-01	0.330471	0.988549	0.936971	Il18	1	REACTOME	up	NP
REACTOME_REGULATION_OF_PYRUVATE_DEHYDROGENASE_PDH_COMPLEX	REACTOME_REGULATION_OF_PYRUVATE_DEHYDROGENASE_PDH_COMPLEX	REACTOME_REGULATION_OF_PYRUVATE_DEHYDROGENASE_PDH_COMPLEX	1/167	4668-11-01	0.330471	0.988549	0.936971	Pdk1	1	REACTOME	up	NP
REACTOME_TRYPTOPHAN_CATABOLISM	REACTOME_TRYPTOPHAN_CATABOLISM	REACTOME_TRYPTOPHAN_CATABOLISM	1/167	4668-11-01	0.330471	0.988549	0.936971	Afmid	1	REACTOME	up	NP
REACTOME_RNA_POLYMERASE_I_TRANSCRIPTION	REACTOME_RNA_POLYMERASE_I_TRANSCRIPTION	REACTOME_RNA_POLYMERASE_I_TRANSCRIPTION	2/167	34/4668	0.344922	0.988549	0.936971	H3f3b/Gtf2h5	2	REACTOME	up	NP
REACTOME_MAPK6_MAPK4_SIGNALING	REACTOME_MAPK6_MAPK4_SIGNALING	REACTOME_MAPK6_MAPK4_SIGNALING	3/167	59/4668	0.353921	0.988549	0.936971	Psmd9/Ccnd3/Jun	3	REACTOME	up	NP
REACTOME_INTERLEUKIN_7_SIGNALING	REACTOME_INTERLEUKIN_7_SIGNALING	REACTOME_INTERLEUKIN_7_SIGNALING	1/167	4668-12-01	0.35448	0.988549	0.936971	Irs2	1	REACTOME	up	NP
REACTOME_NICOTINAMIDE_SALVAGING	REACTOME_NICOTINAMIDE_SALVAGING	REACTOME_NICOTINAMIDE_SALVAGING	1/167	4668-12-01	0.35448	0.988549	0.936971	Cyp8b1	1	REACTOME	up	NP
REACTOME_NOTCH2_ACTIVATION_AND_TRANSMISSION_OF_SIGNAL_TO_THE_NUCLEUS	REACTOME_NOTCH2_ACTIVATION_AND_TRANSMISSION_OF_SIGNAL_TO_THE_NUCLEUS	REACTOME_NOTCH2_ACTIVATION_AND_TRANSMISSION_OF_SIGNAL_TO_THE_NUCLEUS	1/167	4668-12-01	0.35448	0.988549	0.936971	Psen2	1	REACTOME	up	NP
REACTOME_PRC2_METHYLATES_HISTONES_AND_DNA	REACTOME_PRC2_METHYLATES_HISTONES_AND_DNA	REACTOME_PRC2_METHYLATES_HISTONES_AND_DNA	1/167	4668-12-01	0.35448	0.988549	0.936971	H3f3b	1	REACTOME	up	NP
REACTOME_PYROPTOSIS	REACTOME_PYROPTOSIS	REACTOME_PYROPTOSIS	1/167	4668-12-01	0.35448	0.988549	0.936971	Il18	1	REACTOME	up	NP
REACTOME_RAP1_SIGNALLING	REACTOME_RAP1_SIGNALLING	REACTOME_RAP1_SIGNALLING	1/167	4668-12-01	0.35448	0.988549	0.936971	Prkg1	1	REACTOME	up	NP
REACTOME_TELOMERE_C_STRAND_LAGGING_STRAND_SYNTHESIS	REACTOME_TELOMERE_C_STRAND_LAGGING_STRAND_SYNTHESIS	REACTOME_TELOMERE_C_STRAND_LAGGING_STRAND_SYNTHESIS	1/167	4668-12-01	0.35448	0.988549	0.936971	Blm	1	REACTOME	up	NP
REACTOME_TRANSCRIPTIONAL_ACTIVITY_OF_SMAD2_SMAD3_SMAD4_HETEROTRIMER	REACTOME_TRANSCRIPTIONAL_ACTIVITY_OF_SMAD2_SMAD3_SMAD4_HETEROTRIMER	REACTOME_TRANSCRIPTIONAL_ACTIVITY_OF_SMAD2_SMAD3_SMAD4_HETEROTRIMER	2/167	35/4668	0.358054	0.988549	0.936971	Junb/Smad7	2	REACTOME	up	NP
REACTOME_ACTIVATION_OF_GENE_EXPRESSION_BY_SREBF_SREBP	REACTOME_ACTIVATION_OF_GENE_EXPRESSION_BY_SREBF_SREBP	REACTOME_ACTIVATION_OF_GENE_EXPRESSION_BY_SREBF_SREBP	2/167	36/4668	0.371091	0.988549	0.936971	Scd1/Hmgcs1	2	REACTOME	up	NP
REACTOME_BIOSYNTHESIS_OF_THE_N_GLYCAN_PRECURSOR_DOLICHOL_LIPID_LINKED_OLIGOSACCHARIDE_LLO_AND_TRANSFER_TO_A_NASCENT_PROTEIN	REACTOME_BIOSYNTHESIS_OF_THE_N_GLYCAN_PRECURSOR_DOLICHOL_LIPID_LINKED_OLIGOSACCHARIDE_LLO_AND_TRANSFER_TO_A_NASCENT_PROTEIN	REACTOME_BIOSYNTHESIS_OF_THE_N_GLYCAN_PRECURSOR_DOLICHOL_LIPID_LINKED_OLIGOSACCHARIDE_LLO_AND_TRANSFER_TO_A_NASCENT_PROTEIN	2/167	36/4668	0.371091	0.988549	0.936971	St6gal1/Neu2	2	REACTOME	up	NP
REACTOME_CONSTITUTIVE_SIGNALING_BY_ABERRANT_PI3K_IN_CANCER	REACTOME_CONSTITUTIVE_SIGNALING_BY_ABERRANT_PI3K_IN_CANCER	REACTOME_CONSTITUTIVE_SIGNALING_BY_ABERRANT_PI3K_IN_CANCER	2/167	36/4668	0.371091	0.988549	0.936971	Irs2/Klb	2	REACTOME	up	NP
REACTOME_SARS_COV_1_INFECTION	REACTOME_SARS_COV_1_INFECTION	REACTOME_SARS_COV_1_INFECTION	2/167	36/4668	0.371091	0.988549	0.936971	Ctsl/St6gal1	2	REACTOME	up	NP
REACTOME_REGULATION_OF_MRNA_STABILITY_BY_PROTEINS_THAT_BIND_AU_RICH_ELEMENTS	REACTOME_REGULATION_OF_MRNA_STABILITY_BY_PROTEINS_THAT_BIND_AU_RICH_ELEMENTS	REACTOME_REGULATION_OF_MRNA_STABILITY_BY_PROTEINS_THAT_BIND_AU_RICH_ELEMENTS	3/167	61/4668	0.373672	0.988549	0.936971	Psmd9/Zfp36l1/Anp32a	3	REACTOME	up	NP
REACTOME_NRIF_SIGNALS_CELL_DEATH_FROM_THE_NUCLEUS	REACTOME_NRIF_SIGNALS_CELL_DEATH_FROM_THE_NUCLEUS	REACTOME_NRIF_SIGNALS_CELL_DEATH_FROM_THE_NUCLEUS	1/167	13/4668	0.377633	0.988549	0.936971	Psen2	1	REACTOME	up	NP
REACTOME_RNA_POLYMERASE_III_TRANSCRIPTION_TERMINATION	REACTOME_RNA_POLYMERASE_III_TRANSCRIPTION_TERMINATION	REACTOME_RNA_POLYMERASE_III_TRANSCRIPTION_TERMINATION	1/167	13/4668	0.377633	0.988549	0.936971	Nfib	1	REACTOME	up	NP
REACTOME_TRANSPORT_OF_VITAMINS_NUCLEOSIDES_AND_RELATED_MOLECULES	REACTOME_TRANSPORT_OF_VITAMINS_NUCLEOSIDES_AND_RELATED_MOLECULES	REACTOME_TRANSPORT_OF_VITAMINS_NUCLEOSIDES_AND_RELATED_MOLECULES	1/167	13/4668	0.377633	0.988549	0.936971	Slc16a2	1	REACTOME	up	NP
REACTOME_ACTIVATION_OF_ANTERIOR_HOX_GENES_IN_HINDBRAIN_DEVELOPMENT_DURING_EARLY_EMBRYOGENESIS	REACTOME_ACTIVATION_OF_ANTERIOR_HOX_GENES_IN_HINDBRAIN_DEVELOPMENT_DURING_EARLY_EMBRYOGENESIS	REACTOME_ACTIVATION_OF_ANTERIOR_HOX_GENES_IN_HINDBRAIN_DEVELOPMENT_DURING_EARLY_EMBRYOGENESIS	2/167	37/4668	0.384023	0.988549	0.936971	H3f3b/Jun	2	REACTOME	up	NP
REACTOME_PRE_NOTCH_EXPRESSION_AND_PROCESSING	REACTOME_PRE_NOTCH_EXPRESSION_AND_PROCESSING	REACTOME_PRE_NOTCH_EXPRESSION_AND_PROCESSING	2/167	37/4668	0.384023	0.988549	0.936971	H3f3b/Jun	2	REACTOME	up	NP
REACTOME_NRAGE_SIGNALS_DEATH_THROUGH_JNK	REACTOME_NRAGE_SIGNALS_DEATH_THROUGH_JNK	REACTOME_NRAGE_SIGNALS_DEATH_THROUGH_JNK	2/167	38/4668	0.396841	0.988549	0.936971	Arhgef37/Bcl2l11	2	REACTOME	up	NP
REACTOME_DOWNSTREAM_SIGNALING_OF_ACTIVATED_FGFR4	REACTOME_DOWNSTREAM_SIGNALING_OF_ACTIVATED_FGFR4	REACTOME_DOWNSTREAM_SIGNALING_OF_ACTIVATED_FGFR4	1/167	14/4668	0.399961	0.988549	0.936971	Klb	1	REACTOME	up	NP
REACTOME_MRNA_CAPPING	REACTOME_MRNA_CAPPING	REACTOME_MRNA_CAPPING	1/167	14/4668	0.399961	0.988549	0.936971	Gtf2h5	1	REACTOME	up	NP
REACTOME_NOTCH3_ACTIVATION_AND_TRANSMISSION_OF_SIGNAL_TO_THE_NUCLEUS	REACTOME_NOTCH3_ACTIVATION_AND_TRANSMISSION_OF_SIGNAL_TO_THE_NUCLEUS	REACTOME_NOTCH3_ACTIVATION_AND_TRANSMISSION_OF_SIGNAL_TO_THE_NUCLEUS	1/167	14/4668	0.399961	0.988549	0.936971	Psen2	1	REACTOME	up	NP
REACTOME_NUCLEAR_EVENTS_STIMULATED_BY_ALK_SIGNALING_IN_CANCER	REACTOME_NUCLEAR_EVENTS_STIMULATED_BY_ALK_SIGNALING_IN_CANCER	REACTOME_NUCLEAR_EVENTS_STIMULATED_BY_ALK_SIGNALING_IN_CANCER	1/167	14/4668	0.399961	0.988549	0.936971	Junb	1	REACTOME	up	NP
REACTOME_REGULATION_OF_RUNX1_EXPRESSION_AND_ACTIVITY	REACTOME_REGULATION_OF_RUNX1_EXPRESSION_AND_ACTIVITY	REACTOME_REGULATION_OF_RUNX1_EXPRESSION_AND_ACTIVITY	1/167	14/4668	0.399961	0.988549	0.936971	Ccnd3	1	REACTOME	up	NP
REACTOME_SIGNALING_BY_INTERLEUKINS	REACTOME_SIGNALING_BY_INTERLEUKINS	REACTOME_SIGNALING_BY_INTERLEUKINS	9/167	224/4668	0.409282	0.988549	0.936971	Psmd9/Irs2/Map2k6/Pdcd4/Cd36/Jun/Junb/Cebpd/Il18	9	REACTOME	up	NP
REACTOME_RHOQ_GTPASE_CYCLE	REACTOME_RHOQ_GTPASE_CYCLE	REACTOME_RHOQ_GTPASE_CYCLE	2/167	39/4668	0.409536	0.988549	0.936971	Dlc1/Gfod1	2	REACTOME	up	NP
REACTOME_DEATH_RECEPTOR_SIGNALLING	REACTOME_DEATH_RECEPTOR_SIGNALLING	REACTOME_DEATH_RECEPTOR_SIGNALLING	4/167	91/4668	0.411332	0.988549	0.936971	Arhgef37/Psen2/Rtn4/Bcl2l11	4	REACTOME	up	NP
REACTOME_ATF4_ACTIVATES_GENES_IN_RESPONSE_TO_ENDOPLASMIC_RETICULUM_STRESS	REACTOME_ATF4_ACTIVATES_GENES_IN_RESPONSE_TO_ENDOPLASMIC_RETICULUM_STRESS	REACTOME_ATF4_ACTIVATES_GENES_IN_RESPONSE_TO_ENDOPLASMIC_RETICULUM_STRESS	1/167	15/4668	0.421492	0.988549	0.936971	Igfbp1	1	REACTOME	up	NP
REACTOME_CLASS_I_PEROXISOMAL_MEMBRANE_PROTEIN_IMPORT	REACTOME_CLASS_I_PEROXISOMAL_MEMBRANE_PROTEIN_IMPORT	REACTOME_CLASS_I_PEROXISOMAL_MEMBRANE_PROTEIN_IMPORT	1/167	15/4668	0.421492	0.988549	0.936971	Pxmp2	1	REACTOME	up	NP
REACTOME_FORMATION_OF_THE_EARLY_ELONGATION_COMPLEX	REACTOME_FORMATION_OF_THE_EARLY_ELONGATION_COMPLEX	REACTOME_FORMATION_OF_THE_EARLY_ELONGATION_COMPLEX	1/167	15/4668	0.421492	0.988549	0.936971	Gtf2h5	1	REACTOME	up	NP
REACTOME_GROWTH_HORMONE_RECEPTOR_SIGNALING	REACTOME_GROWTH_HORMONE_RECEPTOR_SIGNALING	REACTOME_GROWTH_HORMONE_RECEPTOR_SIGNALING	1/167	15/4668	0.421492	0.988549	0.936971	Irs2	1	REACTOME	up	NP
REACTOME_NEGATIVE_REGULATION_OF_FGFR4_SIGNALING	REACTOME_NEGATIVE_REGULATION_OF_FGFR4_SIGNALING	REACTOME_NEGATIVE_REGULATION_OF_FGFR4_SIGNALING	1/167	15/4668	0.421492	0.988549	0.936971	Klb	1	REACTOME	up	NP
REACTOME_RNA_POLYMERASE_I_TRANSCRIPTION_TERMINATION	REACTOME_RNA_POLYMERASE_I_TRANSCRIPTION_TERMINATION	REACTOME_RNA_POLYMERASE_I_TRANSCRIPTION_TERMINATION	1/167	15/4668	0.421492	0.988549	0.936971	Gtf2h5	1	REACTOME	up	NP
REACTOME_SCAVENGING_BY_CLASS_A_RECEPTORS	REACTOME_SCAVENGING_BY_CLASS_A_RECEPTORS	REACTOME_SCAVENGING_BY_CLASS_A_RECEPTORS	1/167	15/4668	0.421492	0.988549	0.936971	Apoe	1	REACTOME	up	NP
REACTOME_ASYMMETRIC_LOCALIZATION_OF_PCP_PROTEINS	REACTOME_ASYMMETRIC_LOCALIZATION_OF_PCP_PROTEINS	REACTOME_ASYMMETRIC_LOCALIZATION_OF_PCP_PROTEINS	2/167	40/4668	0.422101	0.988549	0.936971	Psmd9/Prickle1	2	REACTOME	up	NP
REACTOME_SIGNALING_BY_NOTCH	REACTOME_SIGNALING_BY_NOTCH	REACTOME_SIGNALING_BY_NOTCH	5/167	120/4668	0.429896	0.988549	0.936971	H3f3b/Psmd9/Psen2/Jun/Hdac11	5	REACTOME	up	NP
REACTOME_SIGNALING_BY_NOTCH1_PEST_DOMAIN_MUTANTS_IN_CANCER	REACTOME_SIGNALING_BY_NOTCH1_PEST_DOMAIN_MUTANTS_IN_CANCER	REACTOME_SIGNALING_BY_NOTCH1_PEST_DOMAIN_MUTANTS_IN_CANCER	2/167	41/4668	0.434528	0.988549	0.936971	Psen2/Hdac11	2	REACTOME	up	NP
REACTOME_ASSEMBLY_OF_ACTIVE_LPL_AND_LIPC_LIPASE_COMPLEXES	REACTOME_ASSEMBLY_OF_ACTIVE_LPL_AND_LIPC_LIPASE_COMPLEXES	REACTOME_ASSEMBLY_OF_ACTIVE_LPL_AND_LIPC_LIPASE_COMPLEXES	1/167	16/4668	0.442255	0.988549	0.936971	Angptl3	1	REACTOME	up	NP
REACTOME_MEIOTIC_SYNAPSIS	REACTOME_MEIOTIC_SYNAPSIS	REACTOME_MEIOTIC_SYNAPSIS	1/167	16/4668	0.442255	0.988549	0.936971	Syne1	1	REACTOME	up	NP
REACTOME_O_LINKED_GLYCOSYLATION_OF_MUCINS	REACTOME_O_LINKED_GLYCOSYLATION_OF_MUCINS	REACTOME_O_LINKED_GLYCOSYLATION_OF_MUCINS	1/167	16/4668	0.442255	0.988549	0.936971	St6gal1	1	REACTOME	up	NP
REACTOME_TP53_REGULATES_TRANSCRIPTION_OF_ADDITIONAL_CELL_CYCLE_GENES_WHOSE_EXACT_ROLE_IN_THE_P53_PATHWAY_REMAIN_UNCERTAIN	REACTOME_TP53_REGULATES_TRANSCRIPTION_OF_ADDITIONAL_CELL_CYCLE_GENES_WHOSE_EXACT_ROLE_IN_THE_P53_PATHWAY_REMAIN_UNCERTAIN	REACTOME_TP53_REGULATES_TRANSCRIPTION_OF_ADDITIONAL_CELL_CYCLE_GENES_WHOSE_EXACT_ROLE_IN_THE_P53_PATHWAY_REMAIN_UNCERTAIN	1/167	16/4668	0.442255	0.988549	0.936971	Btg2	1	REACTOME	up	NP
REACTOME_TP53_REGULATES_TRANSCRIPTION_OF_CELL_DEATH_GENES	REACTOME_TP53_REGULATES_TRANSCRIPTION_OF_CELL_DEATH_GENES	REACTOME_TP53_REGULATES_TRANSCRIPTION_OF_CELL_DEATH_GENES	1/167	16/4668	0.442255	0.988549	0.936971	Trp53inp1	1	REACTOME	up	NP
REACTOME_REGULATION_OF_PTEN_GENE_TRANSCRIPTION	REACTOME_REGULATION_OF_PTEN_GENE_TRANSCRIPTION	REACTOME_REGULATION_OF_PTEN_GENE_TRANSCRIPTION	2/167	42/4668	0.446812	0.988549	0.936971	Jun/Pparg	2	REACTOME	up	NP
REACTOME_RAC1_GTPASE_CYCLE	REACTOME_RAC1_GTPASE_CYCLE	REACTOME_RAC1_GTPASE_CYCLE	5/167	124/4668	0.458296	0.988549	0.936971	Fam13a/Dlc1/Chn2/Wipf3/Nhs	5	REACTOME	up	NP
REACTOME_ACTIVATED_NOTCH1_TRANSMITS_SIGNAL_TO_THE_NUCLEUS	REACTOME_ACTIVATED_NOTCH1_TRANSMITS_SIGNAL_TO_THE_NUCLEUS	REACTOME_ACTIVATED_NOTCH1_TRANSMITS_SIGNAL_TO_THE_NUCLEUS	1/167	17/4668	0.462277	0.988549	0.936971	Psen2	1	REACTOME	up	NP
REACTOME_CHOLESTEROL_BIOSYNTHESIS	REACTOME_CHOLESTEROL_BIOSYNTHESIS	REACTOME_CHOLESTEROL_BIOSYNTHESIS	1/167	17/4668	0.462277	0.988549	0.936971	Hmgcs1	1	REACTOME	up	NP
REACTOME_ERCC6_CSB_AND_EHMT2_G9A_POSITIVELY_REGULATE_RRNA_EXPRESSION	REACTOME_ERCC6_CSB_AND_EHMT2_G9A_POSITIVELY_REGULATE_RRNA_EXPRESSION	REACTOME_ERCC6_CSB_AND_EHMT2_G9A_POSITIVELY_REGULATE_RRNA_EXPRESSION	1/167	17/4668	0.462277	0.988549	0.936971	H3f3b	1	REACTOME	up	NP
REACTOME_HDR_THROUGH_SINGLE_STRAND_ANNEALING_SSA	REACTOME_HDR_THROUGH_SINGLE_STRAND_ANNEALING_SSA	REACTOME_HDR_THROUGH_SINGLE_STRAND_ANNEALING_SSA	1/167	17/4668	0.462277	0.988549	0.936971	Blm	1	REACTOME	up	NP
REACTOME_SIGNALING_BY_BMP	REACTOME_SIGNALING_BY_BMP	REACTOME_SIGNALING_BY_BMP	1/167	17/4668	0.462277	0.988549	0.936971	Smad7	1	REACTOME	up	NP
REACTOME_SYNTHESIS_OF_PA	REACTOME_SYNTHESIS_OF_PA	REACTOME_SYNTHESIS_OF_PA	1/167	17/4668	0.462277	0.988549	0.936971	Gpd1l	1	REACTOME	up	NP
REACTOME_UPTAKE_AND_ACTIONS_OF_BACTERIAL_TOXINS	REACTOME_UPTAKE_AND_ACTIONS_OF_BACTERIAL_TOXINS	REACTOME_UPTAKE_AND_ACTIONS_OF_BACTERIAL_TOXINS	1/167	17/4668	0.462277	0.988549	0.936971	Map2k6	1	REACTOME	up	NP
REACTOME_DEGRADATION_OF_THE_EXTRACELLULAR_MATRIX	REACTOME_DEGRADATION_OF_THE_EXTRACELLULAR_MATRIX	REACTOME_DEGRADATION_OF_THE_EXTRACELLULAR_MATRIX	2/167	44/4668	0.470927	0.988549	0.936971	Ctsl/Dcn	2	REACTOME	up	NP
REACTOME_VISUAL_PHOTOTRANSDUCTION	REACTOME_VISUAL_PHOTOTRANSDUCTION	REACTOME_VISUAL_PHOTOTRANSDUCTION	2/167	44/4668	0.470927	0.988549	0.936971	Apoa2/Apoe	2	REACTOME	up	NP
REACTOME_LEISHMANIA_INFECTION	REACTOME_LEISHMANIA_INFECTION	REACTOME_LEISHMANIA_INFECTION	4/167	99/4668	0.475652	0.988549	0.936971	Jun/Wipf3/Il18/Nt5e	4	REACTOME	up	NP
REACTOME_SENSORY_PERCEPTION	REACTOME_SENSORY_PERCEPTION	REACTOME_SENSORY_PERCEPTION	3/167	72/4668	0.479213	0.988549	0.936971	Apoa2/Apoe/Slc17a8	3	REACTOME	up	NP
REACTOME_TRANSCRIPTIONAL_REGULATION_BY_TP53	REACTOME_TRANSCRIPTIONAL_REGULATION_BY_TP53	REACTOME_TRANSCRIPTIONAL_REGULATION_BY_TP53	8/167	210/4668	0.48024	0.988549	0.936971	Trp53inp1/Btg2/Map2k6/Blm/Jun/Prdx5/Gtf2h5/Msh2	8	REACTOME	up	NP
REACTOME_ACTIVATED_TAK1_MEDIATES_P38_MAPK_ACTIVATION	REACTOME_ACTIVATED_TAK1_MEDIATES_P38_MAPK_ACTIVATION	REACTOME_ACTIVATED_TAK1_MEDIATES_P38_MAPK_ACTIVATION	1/167	18/4668	0.481585	0.988549	0.936971	Map2k6	1	REACTOME	up	NP
REACTOME_ACTIVATION_OF_BH3_ONLY_PROTEINS	REACTOME_ACTIVATION_OF_BH3_ONLY_PROTEINS	REACTOME_ACTIVATION_OF_BH3_ONLY_PROTEINS	1/167	18/4668	0.481585	0.988549	0.936971	Bcl2l11	1	REACTOME	up	NP
REACTOME_ASSEMBLY_OF_COLLAGEN_FIBRILS_AND_OTHER_MULTIMERIC_STRUCTURES	REACTOME_ASSEMBLY_OF_COLLAGEN_FIBRILS_AND_OTHER_MULTIMERIC_STRUCTURES	REACTOME_ASSEMBLY_OF_COLLAGEN_FIBRILS_AND_OTHER_MULTIMERIC_STRUCTURES	1/167	18/4668	0.481585	0.988549	0.936971	Ctsl	1	REACTOME	up	NP
REACTOME_CONSTITUTIVE_SIGNALING_BY_AKT1_E17K_IN_CANCER	REACTOME_CONSTITUTIVE_SIGNALING_BY_AKT1_E17K_IN_CANCER	REACTOME_CONSTITUTIVE_SIGNALING_BY_AKT1_E17K_IN_CANCER	1/167	18/4668	0.481585	0.988549	0.936971	Nr4a1	1	REACTOME	up	NP
REACTOME_EXTENSION_OF_TELOMERES	REACTOME_EXTENSION_OF_TELOMERES	REACTOME_EXTENSION_OF_TELOMERES	1/167	18/4668	0.481585	0.988549	0.936971	Blm	1	REACTOME	up	NP
REACTOME_MYOGENESIS	REACTOME_MYOGENESIS	REACTOME_MYOGENESIS	1/167	18/4668	0.481585	0.988549	0.936971	Map2k6	1	REACTOME	up	NP
REACTOME_SYNTHESIS_OF_PC	REACTOME_SYNTHESIS_OF_PC	REACTOME_SYNTHESIS_OF_PC	1/167	18/4668	0.481585	0.988549	0.936971	Bche	1	REACTOME	up	NP
REACTOME_TRANSFERRIN_ENDOCYTOSIS_AND_RECYCLING	REACTOME_TRANSFERRIN_ENDOCYTOSIS_AND_RECYCLING	REACTOME_TRANSFERRIN_ENDOCYTOSIS_AND_RECYCLING	1/167	18/4668	0.481585	0.988549	0.936971	Trf	1	REACTOME	up	NP
REACTOME_VASOPRESSIN_REGULATES_RENAL_WATER_HOMEOSTASIS_VIA_AQUAPORINS	REACTOME_VASOPRESSIN_REGULATES_RENAL_WATER_HOMEOSTASIS_VIA_AQUAPORINS	REACTOME_VASOPRESSIN_REGULATES_RENAL_WATER_HOMEOSTASIS_VIA_AQUAPORINS	1/167	18/4668	0.481585	0.988549	0.936971	Rab11fip2	1	REACTOME	up	NP
REACTOME_SIGNALING_BY_INSULIN_RECEPTOR	REACTOME_SIGNALING_BY_INSULIN_RECEPTOR	REACTOME_SIGNALING_BY_INSULIN_RECEPTOR	2/167	45/4668	0.482748	0.988549	0.936971	Irs2/Klb	2	REACTOME	up	NP
REACTOME_DISEASES_OF_SIGNAL_TRANSDUCTION_BY_GROWTH_FACTOR_RECEPTORS_AND_SECOND_MESSENGERS	REACTOME_DISEASES_OF_SIGNAL_TRANSDUCTION_BY_GROWTH_FACTOR_RECEPTORS_AND_SECOND_MESSENGERS	REACTOME_DISEASES_OF_SIGNAL_TRANSDUCTION_BY_GROWTH_FACTOR_RECEPTORS_AND_SECOND_MESSENGERS	11/167	294/4668	0.484613	0.988549	0.936971	Fgg/Fgb/Fga/Psmd9/Irs2/Psen2/Klb/Junb/Nr4a1/Hdac11/Bcl2l11	11	REACTOME	up	NP
REACTOME_G_ALPHA_12_13_SIGNALLING_EVENTS	REACTOME_G_ALPHA_12_13_SIGNALLING_EVENTS	REACTOME_G_ALPHA_12_13_SIGNALLING_EVENTS	2/167	46/4668	0.494407	0.988549	0.936971	Arhgef37/Adra1a	2	REACTOME	up	NP
REACTOME_HOMOLOGY_DIRECTED_REPAIR	REACTOME_HOMOLOGY_DIRECTED_REPAIR	REACTOME_HOMOLOGY_DIRECTED_REPAIR	2/167	46/4668	0.494407	0.988549	0.936971	Blm/Rad51b	2	REACTOME	up	NP
REACTOME_REGULATION_OF_TP53_ACTIVITY_THROUGH_PHOSPHORYLATION	REACTOME_REGULATION_OF_TP53_ACTIVITY_THROUGH_PHOSPHORYLATION	REACTOME_REGULATION_OF_TP53_ACTIVITY_THROUGH_PHOSPHORYLATION	2/167	46/4668	0.494407	0.988549	0.936971	Trp53inp1/Blm	2	REACTOME	up	NP
REACTOME_SIGNALING_BY_NTRKS	REACTOME_SIGNALING_BY_NTRKS	REACTOME_SIGNALING_BY_NTRKS	3/167	74/4668	0.497565	0.988549	0.936971	Irs2/Junb/Jund	3	REACTOME	up	NP
REACTOME_AQUAPORIN_MEDIATED_TRANSPORT	REACTOME_AQUAPORIN_MEDIATED_TRANSPORT	REACTOME_AQUAPORIN_MEDIATED_TRANSPORT	1/167	19/4668	0.500203	0.988549	0.936971	Rab11fip2	1	REACTOME	up	NP
REACTOME_B_WICH_COMPLEX_POSITIVELY_REGULATES_RRNA_EXPRESSION	REACTOME_B_WICH_COMPLEX_POSITIVELY_REGULATES_RRNA_EXPRESSION	REACTOME_B_WICH_COMPLEX_POSITIVELY_REGULATES_RRNA_EXPRESSION	1/167	19/4668	0.500203	0.988549	0.936971	H3f3b	1	REACTOME	up	NP
REACTOME_CITRIC_ACID_CYCLE_TCA_CYCLE	REACTOME_CITRIC_ACID_CYCLE_TCA_CYCLE	REACTOME_CITRIC_ACID_CYCLE_TCA_CYCLE	1/167	19/4668	0.500203	0.988549	0.936971	Idh2	1	REACTOME	up	NP
REACTOME_G_ALPHA_Z_SIGNALLING_EVENTS	REACTOME_G_ALPHA_Z_SIGNALLING_EVENTS	REACTOME_G_ALPHA_Z_SIGNALLING_EVENTS	1/167	19/4668	0.500203	0.988549	0.936971	Rgs16	1	REACTOME	up	NP
REACTOME_MAPK_TARGETS_NUCLEAR_EVENTS_MEDIATED_BY_MAP_KINASES	REACTOME_MAPK_TARGETS_NUCLEAR_EVENTS_MEDIATED_BY_MAP_KINASES	REACTOME_MAPK_TARGETS_NUCLEAR_EVENTS_MEDIATED_BY_MAP_KINASES	1/167	19/4668	0.500203	0.988549	0.936971	Jun	1	REACTOME	up	NP
REACTOME_SIGNALING_BY_ERYTHROPOIETIN	REACTOME_SIGNALING_BY_ERYTHROPOIETIN	REACTOME_SIGNALING_BY_ERYTHROPOIETIN	1/167	19/4668	0.500203	0.988549	0.936971	Irs2	1	REACTOME	up	NP
REACTOME_TRANSCRIPTIONAL_REGULATION_OF_GRANULOPOIESIS	REACTOME_TRANSCRIPTIONAL_REGULATION_OF_GRANULOPOIESIS	REACTOME_TRANSCRIPTIONAL_REGULATION_OF_GRANULOPOIESIS	1/167	19/4668	0.500203	0.988549	0.936971	H3f3b	1	REACTOME	up	NP
REACTOME_INTERLEUKIN_17_SIGNALING	REACTOME_INTERLEUKIN_17_SIGNALING	REACTOME_INTERLEUKIN_17_SIGNALING	2/167	47/4668	0.505899	0.988549	0.936971	Map2k6/Jun	2	REACTOME	up	NP
REACTOME_TRANSCRIPTIONAL_ACTIVATION_OF_MITOCHONDRIAL_BIOGENESIS	REACTOME_TRANSCRIPTIONAL_ACTIVATION_OF_MITOCHONDRIAL_BIOGENESIS	REACTOME_TRANSCRIPTIONAL_ACTIVATION_OF_MITOCHONDRIAL_BIOGENESIS	2/167	47/4668	0.505899	0.988549	0.936971	Ppargc1b/Idh2	2	REACTOME	up	NP
REACTOME_THE_CITRIC_ACID_TCA_CYCLE_AND_RESPIRATORY_ELECTRON_TRANSPORT	REACTOME_THE_CITRIC_ACID_TCA_CYCLE_AND_RESPIRATORY_ELECTRON_TRANSPORT	REACTOME_THE_CITRIC_ACID_TCA_CYCLE_AND_RESPIRATORY_ELECTRON_TRANSPORT	5/167	132/4668	0.513797	0.988549	0.936971	Mpc1/Pdk1/Pm20d1/Coq10b/Idh2	5	REACTOME	up	NP
REACTOME_REGULATION_OF_RAS_BY_GAPS	REACTOME_REGULATION_OF_RAS_BY_GAPS	REACTOME_REGULATION_OF_RAS_BY_GAPS	2/167	48/4668	0.517222	0.988549	0.936971	Psmd9/Rasa3	2	REACTOME	up	NP
REACTOME_COLLAGEN_DEGRADATION	REACTOME_COLLAGEN_DEGRADATION	REACTOME_COLLAGEN_DEGRADATION	1/167	20/4668	0.518157	0.988549	0.936971	Ctsl	1	REACTOME	up	NP
REACTOME_DOWNREGULATION_OF_TGF_BETA_RECEPTOR_SIGNALING	REACTOME_DOWNREGULATION_OF_TGF_BETA_RECEPTOR_SIGNALING	REACTOME_DOWNREGULATION_OF_TGF_BETA_RECEPTOR_SIGNALING	1/167	20/4668	0.518157	0.988549	0.936971	Smad7	1	REACTOME	up	NP
REACTOME_FORMATION_OF_THE_BETA_CATENIN_TCF_TRANSACTIVATING_COMPLEX	REACTOME_FORMATION_OF_THE_BETA_CATENIN_TCF_TRANSACTIVATING_COMPLEX	REACTOME_FORMATION_OF_THE_BETA_CATENIN_TCF_TRANSACTIVATING_COMPLEX	1/167	20/4668	0.518157	0.988549	0.936971	H3f3b	1	REACTOME	up	NP
REACTOME_MATURATION_OF_SARS_COV_2_SPIKE_PROTEIN	REACTOME_MATURATION_OF_SARS_COV_2_SPIKE_PROTEIN	REACTOME_MATURATION_OF_SARS_COV_2_SPIKE_PROTEIN	1/167	20/4668	0.518157	0.988549	0.936971	St6gal1	1	REACTOME	up	NP
REACTOME_PERK_REGULATES_GENE_EXPRESSION	REACTOME_PERK_REGULATES_GENE_EXPRESSION	REACTOME_PERK_REGULATES_GENE_EXPRESSION	1/167	20/4668	0.518157	0.988549	0.936971	Igfbp1	1	REACTOME	up	NP
REACTOME_RET_SIGNALING	REACTOME_RET_SIGNALING	REACTOME_RET_SIGNALING	1/167	20/4668	0.518157	0.988549	0.936971	Irs2	1	REACTOME	up	NP
REACTOME_SIGNALING_BY_NOTCH2	REACTOME_SIGNALING_BY_NOTCH2	REACTOME_SIGNALING_BY_NOTCH2	1/167	20/4668	0.518157	0.988549	0.936971	Psen2	1	REACTOME	up	NP
REACTOME_SIGNALING_BY_NOTCH1	REACTOME_SIGNALING_BY_NOTCH1	REACTOME_SIGNALING_BY_NOTCH1	2/167	49/4668	0.528373	0.988549	0.936971	Psen2/Hdac11	2	REACTOME	up	NP
REACTOME_BMAL1_CLOCK_NPAS2_ACTIVATES_CIRCADIAN_GENE_EXPRESSION	REACTOME_BMAL1_CLOCK_NPAS2_ACTIVATES_CIRCADIAN_GENE_EXPRESSION	REACTOME_BMAL1_CLOCK_NPAS2_ACTIVATES_CIRCADIAN_GENE_EXPRESSION	1/167	21/4668	0.535469	0.988549	0.936971	Npas2	1	REACTOME	up	NP
REACTOME_DUAL_INCISION_IN_GG_NER	REACTOME_DUAL_INCISION_IN_GG_NER	REACTOME_DUAL_INCISION_IN_GG_NER	1/167	21/4668	0.535469	0.988549	0.936971	Gtf2h5	1	REACTOME	up	NP
REACTOME_FOXO_MEDIATED_TRANSCRIPTION_OF_OXIDATIVE_STRESS_METABOLIC_AND_NEURONAL_GENES	REACTOME_FOXO_MEDIATED_TRANSCRIPTION_OF_OXIDATIVE_STRESS_METABOLIC_AND_NEURONAL_GENES	REACTOME_FOXO_MEDIATED_TRANSCRIPTION_OF_OXIDATIVE_STRESS_METABOLIC_AND_NEURONAL_GENES	1/167	21/4668	0.535469	0.988549	0.936971	Igfbp1	1	REACTOME	up	NP
REACTOME_GLYCOSPHINGOLIPID_METABOLISM	REACTOME_GLYCOSPHINGOLIPID_METABOLISM	REACTOME_GLYCOSPHINGOLIPID_METABOLISM	1/167	21/4668	0.535469	0.988549	0.936971	Neu2	1	REACTOME	up	NP
REACTOME_NEUROTRANSMITTER_RELEASE_CYCLE	REACTOME_NEUROTRANSMITTER_RELEASE_CYCLE	REACTOME_NEUROTRANSMITTER_RELEASE_CYCLE	1/167	21/4668	0.535469	0.988549	0.936971	Abat	1	REACTOME	up	NP
REACTOME_RUNX1_REGULATES_TRANSCRIPTION_OF_GENES_INVOLVED_IN_DIFFERENTIATION_OF_HSCS	REACTOME_RUNX1_REGULATES_TRANSCRIPTION_OF_GENES_INVOLVED_IN_DIFFERENTIATION_OF_HSCS	REACTOME_RUNX1_REGULATES_TRANSCRIPTION_OF_GENES_INVOLVED_IN_DIFFERENTIATION_OF_HSCS	2/167	50/4668	0.539349	0.988549	0.936971	H3f3b/Psmd9	2	REACTOME	up	NP
REACTOME_L1CAM_INTERACTIONS	REACTOME_L1CAM_INTERACTIONS	REACTOME_L1CAM_INTERACTIONS	2/167	51/4668	0.55015	0.988549	0.936971	Ank3/Nrp2	2	REACTOME	up	NP
REACTOME_DETOXIFICATION_OF_REACTIVE_OXYGEN_SPECIES	REACTOME_DETOXIFICATION_OF_REACTIVE_OXYGEN_SPECIES	REACTOME_DETOXIFICATION_OF_REACTIVE_OXYGEN_SPECIES	1/167	22/4668	0.552163	0.988549	0.936971	Prdx5	1	REACTOME	up	NP
REACTOME_FATTY_ACYL_COA_BIOSYNTHESIS	REACTOME_FATTY_ACYL_COA_BIOSYNTHESIS	REACTOME_FATTY_ACYL_COA_BIOSYNTHESIS	1/167	22/4668	0.552163	0.988549	0.936971	Scd1	1	REACTOME	up	NP
REACTOME_FCERI_MEDIATED_MAPK_ACTIVATION	REACTOME_FCERI_MEDIATED_MAPK_ACTIVATION	REACTOME_FCERI_MEDIATED_MAPK_ACTIVATION	1/167	22/4668	0.552163	0.988549	0.936971	Jun	1	REACTOME	up	NP
REACTOME_HDMS_DEMETHYLATE_HISTONES	REACTOME_HDMS_DEMETHYLATE_HISTONES	REACTOME_HDMS_DEMETHYLATE_HISTONES	1/167	22/4668	0.552163	0.988549	0.936971	Kdm2b	1	REACTOME	up	NP
REACTOME_DNA_REPLICATION_PRE_INITIATION	REACTOME_DNA_REPLICATION_PRE_INITIATION	REACTOME_DNA_REPLICATION_PRE_INITIATION	2/167	52/4668	0.560772	0.988549	0.936971	H3f3b/Psmd9	2	REACTOME	up	NP
REACTOME_SARS_COV_2_INFECTION	REACTOME_SARS_COV_2_INFECTION	REACTOME_SARS_COV_2_INFECTION	2/167	52/4668	0.560772	0.988549	0.936971	Ctsl/St6gal1	2	REACTOME	up	NP
REACTOME_CHONDROITIN_SULFATE_DERMATAN_SULFATE_METABOLISM	REACTOME_CHONDROITIN_SULFATE_DERMATAN_SULFATE_METABOLISM	REACTOME_CHONDROITIN_SULFATE_DERMATAN_SULFATE_METABOLISM	1/167	23/4668	0.568261	0.988549	0.936971	Dcn	1	REACTOME	up	NP
REACTOME_DOWNREGULATION_OF_SMAD2_3_SMAD4_TRANSCRIPTIONAL_ACTIVITY	REACTOME_DOWNREGULATION_OF_SMAD2_3_SMAD4_TRANSCRIPTIONAL_ACTIVITY	REACTOME_DOWNREGULATION_OF_SMAD2_3_SMAD4_TRANSCRIPTIONAL_ACTIVITY	1/167	23/4668	0.568261	0.988549	0.936971	Smad7	1	REACTOME	up	NP
REACTOME_GENE_AND_PROTEIN_EXPRESSION_BY_JAK_STAT_SIGNALING_AFTER_INTERLEUKIN_12_STIMULATION	REACTOME_GENE_AND_PROTEIN_EXPRESSION_BY_JAK_STAT_SIGNALING_AFTER_INTERLEUKIN_12_STIMULATION	REACTOME_GENE_AND_PROTEIN_EXPRESSION_BY_JAK_STAT_SIGNALING_AFTER_INTERLEUKIN_12_STIMULATION	1/167	23/4668	0.568261	0.988549	0.936971	Pdcd4	1	REACTOME	up	NP
REACTOME_HIV_TRANSCRIPTION_ELONGATION	REACTOME_HIV_TRANSCRIPTION_ELONGATION	REACTOME_HIV_TRANSCRIPTION_ELONGATION	1/167	23/4668	0.568261	0.988549	0.936971	Gtf2h5	1	REACTOME	up	NP
REACTOME_NOTCH_HLH_TRANSCRIPTION_PATHWAY	REACTOME_NOTCH_HLH_TRANSCRIPTION_PATHWAY	REACTOME_NOTCH_HLH_TRANSCRIPTION_PATHWAY	1/167	23/4668	0.568261	0.988549	0.936971	Hdac11	1	REACTOME	up	NP
REACTOME_RHO_GTPASES_ACTIVATE_PKNS	REACTOME_RHO_GTPASES_ACTIVATE_PKNS	REACTOME_RHO_GTPASES_ACTIVATE_PKNS	1/167	23/4668	0.568261	0.988549	0.936971	H3f3b	1	REACTOME	up	NP
REACTOME_RNA_POLYMERASE_III_TRANSCRIPTION	REACTOME_RNA_POLYMERASE_III_TRANSCRIPTION	REACTOME_RNA_POLYMERASE_III_TRANSCRIPTION	1/167	23/4668	0.568261	0.988549	0.936971	Nfib	1	REACTOME	up	NP
REACTOME_SIGNALING_BY_FGFR4	REACTOME_SIGNALING_BY_FGFR4	REACTOME_SIGNALING_BY_FGFR4	1/167	23/4668	0.568261	0.988549	0.936971	Klb	1	REACTOME	up	NP
REACTOME_SIGNALING_BY_RETINOIC_ACID	REACTOME_SIGNALING_BY_RETINOIC_ACID	REACTOME_SIGNALING_BY_RETINOIC_ACID	1/167	23/4668	0.568261	0.988549	0.936971	Pdk1	1	REACTOME	up	NP
REACTOME_TRANSLATION_OF_SARS_COV_1_STRUCTURAL_PROTEINS	REACTOME_TRANSLATION_OF_SARS_COV_1_STRUCTURAL_PROTEINS	REACTOME_TRANSLATION_OF_SARS_COV_1_STRUCTURAL_PROTEINS	1/167	23/4668	0.568261	0.988549	0.936971	St6gal1	1	REACTOME	up	NP
REACTOME_REGULATION_OF_RUNX2_EXPRESSION_AND_ACTIVITY	REACTOME_REGULATION_OF_RUNX2_EXPRESSION_AND_ACTIVITY	REACTOME_REGULATION_OF_RUNX2_EXPRESSION_AND_ACTIVITY	2/167	53/4668	0.571216	0.988549	0.936971	Psmd9/Ppargc1b	2	REACTOME	up	NP
REACTOME_CELLULAR_RESPONSE_TO_HYPOXIA	REACTOME_CELLULAR_RESPONSE_TO_HYPOXIA	REACTOME_CELLULAR_RESPONSE_TO_HYPOXIA	2/167	54/4668	0.58148	0.988549	0.936971	Psmd9/Cited2	2	REACTOME	up	NP
REACTOME_GLYCOSAMINOGLYCAN_METABOLISM	REACTOME_GLYCOSAMINOGLYCAN_METABOLISM	REACTOME_GLYCOSAMINOGLYCAN_METABOLISM	2/167	54/4668	0.58148	0.988549	0.936971	Papss2/Dcn	2	REACTOME	up	NP
REACTOME_DISEASES_OF_MITOTIC_CELL_CYCLE	REACTOME_DISEASES_OF_MITOTIC_CELL_CYCLE	REACTOME_DISEASES_OF_MITOTIC_CELL_CYCLE	1/167	24/4668	0.583783	0.988549	0.936971	Ccnd3	1	REACTOME	up	NP
REACTOME_HEPARAN_SULFATE_HEPARIN_HS_GAG_METABOLISM	REACTOME_HEPARAN_SULFATE_HEPARIN_HS_GAG_METABOLISM	REACTOME_HEPARAN_SULFATE_HEPARIN_HS_GAG_METABOLISM	1/167	24/4668	0.583783	0.988549	0.936971	Dcn	1	REACTOME	up	NP
REACTOME_HIV_TRANSCRIPTION_INITIATION	REACTOME_HIV_TRANSCRIPTION_INITIATION	REACTOME_HIV_TRANSCRIPTION_INITIATION	1/167	24/4668	0.583783	0.988549	0.936971	Gtf2h5	1	REACTOME	up	NP
REACTOME_INTERLEUKIN_1_FAMILY_SIGNALING	REACTOME_INTERLEUKIN_1_FAMILY_SIGNALING	REACTOME_INTERLEUKIN_1_FAMILY_SIGNALING	3/167	84/4668	0.584066	0.988549	0.936971	Psmd9/Map2k6/Il18	3	REACTOME	up	NP
REACTOME_METABOLISM_OF_CARBOHYDRATES	REACTOME_METABOLISM_OF_CARBOHYDRATES	REACTOME_METABOLISM_OF_CARBOHYDRATES	5/167	143/4668	0.586025	0.988549	0.936971	Pcx/Papss2/Pfkfb1/Got1/Dcn	5	REACTOME	up	NP
REACTOME_CELLULAR_SENESCENCE	REACTOME_CELLULAR_SENESCENCE	REACTOME_CELLULAR_SENESCENCE	3/167	85/4668	0.592187	0.988549	0.936971	H3f3b/Map2k6/Jun	3	REACTOME	up	NP
REACTOME_NEUTROPHIL_DEGRANULATION	REACTOME_NEUTROPHIL_DEGRANULATION	REACTOME_NEUTROPHIL_DEGRANULATION	9/167	261/4668	0.595817	0.988549	0.936971	Mgst1/Pgrmc1/Serpinb6a/Serpina3n/Cd36/Creg1/Mospd2/Cst3/Cmtm6	9	REACTOME	up	NP
REACTOME_IMMUNOREGULATORY_INTERACTIONS_BETWEEN_A_LYMPHOID_AND_A_NON_LYMPHOID_CELL	REACTOME_IMMUNOREGULATORY_INTERACTIONS_BETWEEN_A_LYMPHOID_AND_A_NON_LYMPHOID_CELL	REACTOME_IMMUNOREGULATORY_INTERACTIONS_BETWEEN_A_LYMPHOID_AND_A_NON_LYMPHOID_CELL	1/167	25/4668	0.59875	0.988549	0.936971	Cd81	1	REACTOME	up	NP
REACTOME_REGULATION_OF_TP53_ACTIVITY_THROUGH_ACETYLATION	REACTOME_REGULATION_OF_TP53_ACTIVITY_THROUGH_ACETYLATION	REACTOME_REGULATION_OF_TP53_ACTIVITY_THROUGH_ACETYLATION	1/167	25/4668	0.59875	0.988549	0.936971	Map2k6	1	REACTOME	up	NP
REACTOME_TGF_BETA_RECEPTOR_SIGNALING_ACTIVATES_SMADS	REACTOME_TGF_BETA_RECEPTOR_SIGNALING_ACTIVATES_SMADS	REACTOME_TGF_BETA_RECEPTOR_SIGNALING_ACTIVATES_SMADS	1/167	25/4668	0.59875	0.988549	0.936971	Smad7	1	REACTOME	up	NP
REACTOME_TP53_REGULATES_TRANSCRIPTION_OF_CELL_CYCLE_GENES	REACTOME_TP53_REGULATES_TRANSCRIPTION_OF_CELL_CYCLE_GENES	REACTOME_TP53_REGULATES_TRANSCRIPTION_OF_CELL_CYCLE_GENES	1/167	25/4668	0.59875	0.988549	0.936971	Btg2	1	REACTOME	up	NP
REACTOME_BETA_CATENIN_INDEPENDENT_WNT_SIGNALING	REACTOME_BETA_CATENIN_INDEPENDENT_WNT_SIGNALING	REACTOME_BETA_CATENIN_INDEPENDENT_WNT_SIGNALING	3/167	86/4668	0.600206	0.988549	0.936971	Psmd9/Prickle1/Prkg1	3	REACTOME	up	NP
REACTOME_DISEASES_OF_GLYCOSYLATION	REACTOME_DISEASES_OF_GLYCOSYLATION	REACTOME_DISEASES_OF_GLYCOSYLATION	2/167	56/4668	0.601467	0.988549	0.936971	Papss2/Dcn	2	REACTOME	up	NP
REACTOME_SLC_MEDIATED_TRANSMEMBRANE_TRANSPORT	REACTOME_SLC_MEDIATED_TRANSMEMBRANE_TRANSPORT	REACTOME_SLC_MEDIATED_TRANSMEMBRANE_TRANSPORT	3/167	87/4668	0.608123	0.988549	0.936971	Slc16a7/Slc17a8/Slc16a2	3	REACTOME	up	NP
REACTOME_INTEGRATION_OF_ENERGY_METABOLISM	REACTOME_INTEGRATION_OF_ENERGY_METABOLISM	REACTOME_INTEGRATION_OF_ENERGY_METABOLISM	2/167	57/4668	0.611189	0.988549	0.936971	Pfkfb1/Cd36	2	REACTOME	up	NP
REACTOME_SIGNALING_BY_TGF_BETA_RECEPTOR_COMPLEX	REACTOME_SIGNALING_BY_TGF_BETA_RECEPTOR_COMPLEX	REACTOME_SIGNALING_BY_TGF_BETA_RECEPTOR_COMPLEX	2/167	57/4668	0.611189	0.988549	0.936971	Junb/Smad7	2	REACTOME	up	NP
REACTOME_COLLAGEN_FORMATION	REACTOME_COLLAGEN_FORMATION	REACTOME_COLLAGEN_FORMATION	1/167	26/4668	0.613182	0.988549	0.936971	Ctsl	1	REACTOME	up	NP
REACTOME_CYCLIN_D_ASSOCIATED_EVENTS_IN_G1	REACTOME_CYCLIN_D_ASSOCIATED_EVENTS_IN_G1	REACTOME_CYCLIN_D_ASSOCIATED_EVENTS_IN_G1	1/167	26/4668	0.613182	0.988549	0.936971	Ccnd3	1	REACTOME	up	NP
REACTOME_NEGATIVE_REGULATORS_OF_DDX58_IFIH1_SIGNALING	REACTOME_NEGATIVE_REGULATORS_OF_DDX58_IFIH1_SIGNALING	REACTOME_NEGATIVE_REGULATORS_OF_DDX58_IFIH1_SIGNALING	1/167	26/4668	0.613182	0.988549	0.936971	Rnf125	1	REACTOME	up	NP
REACTOME_NETRIN_1_SIGNALING	REACTOME_NETRIN_1_SIGNALING	REACTOME_NETRIN_1_SIGNALING	1/167	26/4668	0.613182	0.988549	0.936971	Robo1	1	REACTOME	up	NP
REACTOME_NOD1_2_SIGNALING_PATHWAY	REACTOME_NOD1_2_SIGNALING_PATHWAY	REACTOME_NOD1_2_SIGNALING_PATHWAY	1/167	26/4668	0.613182	0.988549	0.936971	Map2k6	1	REACTOME	up	NP
REACTOME_NEGATIVE_REGULATION_OF_THE_PI3K_AKT_NETWORK	REACTOME_NEGATIVE_REGULATION_OF_THE_PI3K_AKT_NETWORK	REACTOME_NEGATIVE_REGULATION_OF_THE_PI3K_AKT_NETWORK	2/167	58/4668	0.620731	0.988549	0.936971	Irs2/Klb	2	REACTOME	up	NP
REACTOME_PCP_CE_PATHWAY	REACTOME_PCP_CE_PATHWAY	REACTOME_PCP_CE_PATHWAY	2/167	58/4668	0.620731	0.988549	0.936971	Psmd9/Prickle1	2	REACTOME	up	NP
REACTOME_TRANSCRIPTIONAL_REGULATION_BY_RUNX1	REACTOME_TRANSCRIPTIONAL_REGULATION_BY_RUNX1	REACTOME_TRANSCRIPTIONAL_REGULATION_BY_RUNX1	4/167	119/4668	0.622217	0.988549	0.936971	Ctsl/H3f3b/Psmd9/Ccnd3	4	REACTOME	up	NP
REACTOME_RUNX1_REGULATES_GENES_INVOLVED_IN_MEGAKARYOCYTE_DIFFERENTIATION_AND_PLATELET_FUNCTION	REACTOME_RUNX1_REGULATES_GENES_INVOLVED_IN_MEGAKARYOCYTE_DIFFERENTIATION_AND_PLATELET_FUNCTION	REACTOME_RUNX1_REGULATES_GENES_INVOLVED_IN_MEGAKARYOCYTE_DIFFERENTIATION_AND_PLATELET_FUNCTION	1/167	27/4668	0.627098	0.988549	0.936971	H3f3b	1	REACTOME	up	NP
REACTOME_SUMOYLATION	REACTOME_SUMOYLATION	REACTOME_SUMOYLATION	4/167	121/4668	0.635407	0.988549	0.936971	Blm/Rwdd3/Pparg/Thra	4	REACTOME	up	NP
REACTOME_REGULATION_OF_TP53_ACTIVITY	REACTOME_REGULATION_OF_TP53_ACTIVITY	REACTOME_REGULATION_OF_TP53_ACTIVITY	3/167	91/4668	0.638744	0.988549	0.936971	Trp53inp1/Map2k6/Blm	3	REACTOME	up	NP
REACTOME_CIRCADIAN_CLOCK	REACTOME_CIRCADIAN_CLOCK	REACTOME_CIRCADIAN_CLOCK	2/167	60/4668	0.639275	0.988549	0.936971	Nfil3/Npas2	2	REACTOME	up	NP
REACTOME_SIGNALING_BY_NOTCH4	REACTOME_SIGNALING_BY_NOTCH4	REACTOME_SIGNALING_BY_NOTCH4	2/167	60/4668	0.639275	0.988549	0.936971	Psmd9/Psen2	2	REACTOME	up	NP
REACTOME_EPH_EPHRIN_MEDIATED_REPULSION_OF_CELLS	REACTOME_EPH_EPHRIN_MEDIATED_REPULSION_OF_CELLS	REACTOME_EPH_EPHRIN_MEDIATED_REPULSION_OF_CELLS	1/167	28/4668	0.640517	0.988549	0.936971	Psen2	1	REACTOME	up	NP
REACTOME_INTERLEUKIN_12_SIGNALING	REACTOME_INTERLEUKIN_12_SIGNALING	REACTOME_INTERLEUKIN_12_SIGNALING	1/167	28/4668	0.640517	0.988549	0.936971	Pdcd4	1	REACTOME	up	NP
REACTOME_PLASMA_LIPOPROTEIN_CLEARANCE	REACTOME_PLASMA_LIPOPROTEIN_CLEARANCE	REACTOME_PLASMA_LIPOPROTEIN_CLEARANCE	1/167	28/4668	0.640517	0.988549	0.936971	Apoe	1	REACTOME	up	NP
REACTOME_SENSORY_PROCESSING_OF_SOUND	REACTOME_SENSORY_PROCESSING_OF_SOUND	REACTOME_SENSORY_PROCESSING_OF_SOUND	1/167	28/4668	0.640517	0.988549	0.936971	Slc17a8	1	REACTOME	up	NP
REACTOME_TRANSCRIPTIONAL_REGULATION_BY_SMALL_RNAS	REACTOME_TRANSCRIPTIONAL_REGULATION_BY_SMALL_RNAS	REACTOME_TRANSCRIPTIONAL_REGULATION_BY_SMALL_RNAS	1/167	28/4668	0.640517	0.988549	0.936971	H3f3b	1	REACTOME	up	NP
REACTOME_TRANSPORT_OF_BILE_SALTS_AND_ORGANIC_ACIDS_METAL_IONS_AND_AMINE_COMPOUNDS	REACTOME_TRANSPORT_OF_BILE_SALTS_AND_ORGANIC_ACIDS_METAL_IONS_AND_AMINE_COMPOUNDS	REACTOME_TRANSPORT_OF_BILE_SALTS_AND_ORGANIC_ACIDS_METAL_IONS_AND_AMINE_COMPOUNDS	1/167	28/4668	0.640517	0.988549	0.936971	Slc16a7	1	REACTOME	up	NP
REACTOME_UCH_PROTEINASES	REACTOME_UCH_PROTEINASES	REACTOME_UCH_PROTEINASES	2/167	61/4668	0.648278	0.988549	0.936971	Psmd9/Smad7	2	REACTOME	up	NP
REACTOME_CA2_PATHWAY	REACTOME_CA2_PATHWAY	REACTOME_CA2_PATHWAY	1/167	29/4668	0.653455	0.988549	0.936971	Prkg1	1	REACTOME	up	NP
REACTOME_RHO_GTPASES_ACTIVATE_WASPS_AND_WAVES	REACTOME_RHO_GTPASES_ACTIVATE_WASPS_AND_WAVES	REACTOME_RHO_GTPASES_ACTIVATE_WASPS_AND_WAVES	1/167	29/4668	0.653455	0.988549	0.936971	Wipf3	1	REACTOME	up	NP
REACTOME_EPIGENETIC_REGULATION_OF_GENE_EXPRESSION	REACTOME_EPIGENETIC_REGULATION_OF_GENE_EXPRESSION	REACTOME_EPIGENETIC_REGULATION_OF_GENE_EXPRESSION	2/167	62/4668	0.657104	0.988549	0.936971	H3f3b/Gtf2h5	2	REACTOME	up	NP
REACTOME_TOLL_LIKE_RECEPTOR_9_TLR9_CASCADE	REACTOME_TOLL_LIKE_RECEPTOR_9_TLR9_CASCADE	REACTOME_TOLL_LIKE_RECEPTOR_9_TLR9_CASCADE	2/167	62/4668	0.657104	0.988549	0.936971	Map2k6/Jun	2	REACTOME	up	NP
REACTOME_ECM_PROTEOGLYCANS	REACTOME_ECM_PROTEOGLYCANS	REACTOME_ECM_PROTEOGLYCANS	1/167	30/4668	0.66593	0.988549	0.936971	Dcn	1	REACTOME	up	NP
REACTOME_FLT3_SIGNALING	REACTOME_FLT3_SIGNALING	REACTOME_FLT3_SIGNALING	1/167	30/4668	0.66593	0.988549	0.936971	Bcl2l11	1	REACTOME	up	NP
REACTOME_HSP90_CHAPERONE_CYCLE_FOR_STEROID_HORMONE_RECEPTORS_SHR_IN_THE_PRESENCE_OF_LIGAND	REACTOME_HSP90_CHAPERONE_CYCLE_FOR_STEROID_HORMONE_RECEPTORS_SHR_IN_THE_PRESENCE_OF_LIGAND	REACTOME_HSP90_CHAPERONE_CYCLE_FOR_STEROID_HORMONE_RECEPTORS_SHR_IN_THE_PRESENCE_OF_LIGAND	1/167	30/4668	0.66593	0.988549	0.936971	Fkbp5	1	REACTOME	up	NP
REACTOME_INTRINSIC_PATHWAY_FOR_APOPTOSIS	REACTOME_INTRINSIC_PATHWAY_FOR_APOPTOSIS	REACTOME_INTRINSIC_PATHWAY_FOR_APOPTOSIS	1/167	30/4668	0.66593	0.988549	0.936971	Bcl2l11	1	REACTOME	up	NP
REACTOME_O_LINKED_GLYCOSYLATION	REACTOME_O_LINKED_GLYCOSYLATION	REACTOME_O_LINKED_GLYCOSYLATION	1/167	30/4668	0.66593	0.988549	0.936971	St6gal1	1	REACTOME	up	NP
REACTOME_RNA_POLYMERASE_I_TRANSCRIPTION_INITIATION	REACTOME_RNA_POLYMERASE_I_TRANSCRIPTION_INITIATION	REACTOME_RNA_POLYMERASE_I_TRANSCRIPTION_INITIATION	1/167	30/4668	0.66593	0.988549	0.936971	Gtf2h5	1	REACTOME	up	NP
REACTOME_SIGNALING_BY_NOTCH3	REACTOME_SIGNALING_BY_NOTCH3	REACTOME_SIGNALING_BY_NOTCH3	1/167	30/4668	0.66593	0.988549	0.936971	Psen2	1	REACTOME	up	NP
REACTOME_DNA_DOUBLE_STRAND_BREAK_REPAIR	REACTOME_DNA_DOUBLE_STRAND_BREAK_REPAIR	REACTOME_DNA_DOUBLE_STRAND_BREAK_REPAIR	2/167	64/4668	0.674227	0.988549	0.936971	Blm/Rad51b	2	REACTOME	up	NP
REACTOME_UNFOLDED_PROTEIN_RESPONSE_UPR	REACTOME_UNFOLDED_PROTEIN_RESPONSE_UPR	REACTOME_UNFOLDED_PROTEIN_RESPONSE_UPR	2/167	64/4668	0.674227	0.988549	0.936971	Sult1a1/Igfbp1	2	REACTOME	up	NP
REACTOME_FORMATION_OF_INCISION_COMPLEX_IN_GG_NER	REACTOME_FORMATION_OF_INCISION_COMPLEX_IN_GG_NER	REACTOME_FORMATION_OF_INCISION_COMPLEX_IN_GG_NER	1/167	32/4668	0.689557	0.988549	0.936971	Gtf2h5	1	REACTOME	up	NP
REACTOME_FORMATION_OF_TC_NER_PRE_INCISION_COMPLEX	REACTOME_FORMATION_OF_TC_NER_PRE_INCISION_COMPLEX	REACTOME_FORMATION_OF_TC_NER_PRE_INCISION_COMPLEX	1/167	32/4668	0.689557	0.988549	0.936971	Gtf2h5	1	REACTOME	up	NP
REACTOME_INTERLEUKIN_12_FAMILY_SIGNALING	REACTOME_INTERLEUKIN_12_FAMILY_SIGNALING	REACTOME_INTERLEUKIN_12_FAMILY_SIGNALING	1/167	32/4668	0.689557	0.988549	0.936971	Pdcd4	1	REACTOME	up	NP
REACTOME_MYD88_INDEPENDENT_TLR4_CASCADE	REACTOME_MYD88_INDEPENDENT_TLR4_CASCADE	REACTOME_MYD88_INDEPENDENT_TLR4_CASCADE	2/167	66/4668	0.690654	0.988549	0.936971	Map2k6/Jun	2	REACTOME	up	NP
REACTOME_SIGNALING_BY_ROBO_RECEPTORS	REACTOME_SIGNALING_BY_ROBO_RECEPTORS	REACTOME_SIGNALING_BY_ROBO_RECEPTORS	5/167	162/4668	0.695844	0.988549	0.936971	Psmd9/Cxcl12/Robo1/Rps23/Rpl7	5	REACTOME	up	NP
REACTOME_INTRACELLULAR_SIGNALING_BY_SECOND_MESSENGERS	REACTOME_INTRACELLULAR_SIGNALING_BY_SECOND_MESSENGERS	REACTOME_INTRACELLULAR_SIGNALING_BY_SECOND_MESSENGERS	6/167	193/4668	0.696762	0.988549	0.936971	Psmd9/Irs2/Klb/Jun/Nr4a1/Pparg	6	REACTOME	up	NP
REACTOME_GLYCEROPHOSPHOLIPID_BIOSYNTHESIS	REACTOME_GLYCEROPHOSPHOLIPID_BIOSYNTHESIS	REACTOME_GLYCEROPHOSPHOLIPID_BIOSYNTHESIS	2/167	67/4668	0.69861	0.988549	0.936971	Bche/Gpd1l	2	REACTOME	up	NP
REACTOME_DUAL_INCISION_IN_TC_NER	REACTOME_DUAL_INCISION_IN_TC_NER	REACTOME_DUAL_INCISION_IN_TC_NER	1/167	33/4668	0.70074	0.988549	0.936971	Gtf2h5	1	REACTOME	up	NP
REACTOME_G2_M_DNA_DAMAGE_CHECKPOINT	REACTOME_G2_M_DNA_DAMAGE_CHECKPOINT	REACTOME_G2_M_DNA_DAMAGE_CHECKPOINT	1/167	33/4668	0.70074	0.988549	0.936971	Blm	1	REACTOME	up	NP
REACTOME_POSITIVE_EPIGENETIC_REGULATION_OF_RRNA_EXPRESSION	REACTOME_POSITIVE_EPIGENETIC_REGULATION_OF_RRNA_EXPRESSION	REACTOME_POSITIVE_EPIGENETIC_REGULATION_OF_RRNA_EXPRESSION	1/167	33/4668	0.70074	0.988549	0.936971	H3f3b	1	REACTOME	up	NP
REACTOME_REGULATED_NECROSIS	REACTOME_REGULATED_NECROSIS	REACTOME_REGULATED_NECROSIS	1/167	33/4668	0.70074	0.988549	0.936971	Il18	1	REACTOME	up	NP
REACTOME_ABC_FAMILY_PROTEINS_MEDIATED_TRANSPORT	REACTOME_ABC_FAMILY_PROTEINS_MEDIATED_TRANSPORT	REACTOME_ABC_FAMILY_PROTEINS_MEDIATED_TRANSPORT	2/167	68/4668	0.706397	0.988549	0.936971	Abcc3/Psmd9	2	REACTOME	up	NP
REACTOME_SIGNALING_BY_TGFB_FAMILY_MEMBERS	REACTOME_SIGNALING_BY_TGFB_FAMILY_MEMBERS	REACTOME_SIGNALING_BY_TGFB_FAMILY_MEMBERS	2/167	68/4668	0.706397	0.988549	0.936971	Junb/Smad7	2	REACTOME	up	NP
REACTOME_PTEN_REGULATION	REACTOME_PTEN_REGULATION	REACTOME_PTEN_REGULATION	3/167	101/4668	0.707849	0.988549	0.936971	Psmd9/Jun/Pparg	3	REACTOME	up	NP
REACTOME_CROSS_PRESENTATION_OF_SOLUBLE_EXOGENOUS_ANTIGENS_ENDOSOMES	REACTOME_CROSS_PRESENTATION_OF_SOLUBLE_EXOGENOUS_ANTIGENS_ENDOSOMES	REACTOME_CROSS_PRESENTATION_OF_SOLUBLE_EXOGENOUS_ANTIGENS_ENDOSOMES	1/167	34/4668	0.711523	0.988549	0.936971	Psmd9	1	REACTOME	up	NP
REACTOME_HCMV_LATE_EVENTS	REACTOME_HCMV_LATE_EVENTS	REACTOME_HCMV_LATE_EVENTS	1/167	34/4668	0.711523	0.988549	0.936971	Cebpd	1	REACTOME	up	NP
REACTOME_REGULATION_OF_EXPRESSION_OF_SLITS_AND_ROBOS	REACTOME_REGULATION_OF_EXPRESSION_OF_SLITS_AND_ROBOS	REACTOME_REGULATION_OF_EXPRESSION_OF_SLITS_AND_ROBOS	4/167	134/4668	0.713755	0.988549	0.936971	Psmd9/Robo1/Rps23/Rpl7	4	REACTOME	up	NP
REACTOME_FORMATION_OF_RNA_POL_II_ELONGATION_COMPLEX	REACTOME_FORMATION_OF_RNA_POL_II_ELONGATION_COMPLEX	REACTOME_FORMATION_OF_RNA_POL_II_ELONGATION_COMPLEX	1/167	35/4668	0.721919	0.988549	0.936971	Gtf2h5	1	REACTOME	up	NP
REACTOME_IRON_UPTAKE_AND_TRANSPORT	REACTOME_IRON_UPTAKE_AND_TRANSPORT	REACTOME_IRON_UPTAKE_AND_TRANSPORT	1/167	35/4668	0.721919	0.988549	0.936971	Trf	1	REACTOME	up	NP
REACTOME_PROCESSING_OF_DNA_DOUBLE_STRAND_BREAK_ENDS	REACTOME_PROCESSING_OF_DNA_DOUBLE_STRAND_BREAK_ENDS	REACTOME_PROCESSING_OF_DNA_DOUBLE_STRAND_BREAK_ENDS	1/167	35/4668	0.721919	0.988549	0.936971	Blm	1	REACTOME	up	NP
REACTOME_DNA_REPLICATION	REACTOME_DNA_REPLICATION	REACTOME_DNA_REPLICATION	2/167	71/4668	0.728763	0.988549	0.936971	H3f3b/Psmd9	2	REACTOME	up	NP
REACTOME_FACTORS_INVOLVED_IN_MEGAKARYOCYTE_DEVELOPMENT_AND_PLATELET_PRODUCTION	REACTOME_FACTORS_INVOLVED_IN_MEGAKARYOCYTE_DEVELOPMENT_AND_PLATELET_PRODUCTION	REACTOME_FACTORS_INVOLVED_IN_MEGAKARYOCYTE_DEVELOPMENT_AND_PLATELET_PRODUCTION	2/167	71/4668	0.728763	0.988549	0.936971	H3f3b/Rad51b	2	REACTOME	up	NP
REACTOME_NOTCH1_INTRACELLULAR_DOMAIN_REGULATES_TRANSCRIPTION	REACTOME_NOTCH1_INTRACELLULAR_DOMAIN_REGULATES_TRANSCRIPTION	REACTOME_NOTCH1_INTRACELLULAR_DOMAIN_REGULATES_TRANSCRIPTION	1/167	36/4668	0.731943	0.988549	0.936971	Hdac11	1	REACTOME	up	NP
REACTOME_RHOD_GTPASE_CYCLE	REACTOME_RHOD_GTPASE_CYCLE	REACTOME_RHOD_GTPASE_CYCLE	1/167	36/4668	0.731943	0.988549	0.936971	Mospd2	1	REACTOME	up	NP
REACTOME_SEMAPHORIN_INTERACTIONS	REACTOME_SEMAPHORIN_INTERACTIONS	REACTOME_SEMAPHORIN_INTERACTIONS	1/167	36/4668	0.731943	0.988549	0.936971	Plxna2	1	REACTOME	up	NP
REACTOME_INTERLEUKIN_1_SIGNALING	REACTOME_INTERLEUKIN_1_SIGNALING	REACTOME_INTERLEUKIN_1_SIGNALING	2/167	72/4668	0.735893	0.988549	0.936971	Psmd9/Map2k6	2	REACTOME	up	NP
REACTOME_TRANSCRIPTIONAL_REGULATION_BY_RUNX3	REACTOME_TRANSCRIPTIONAL_REGULATION_BY_RUNX3	REACTOME_TRANSCRIPTIONAL_REGULATION_BY_RUNX3	2/167	72/4668	0.735893	0.988549	0.936971	Psmd9/Bcl2l11	2	REACTOME	up	NP
REACTOME_NUCLEOTIDE_BINDING_DOMAIN_LEUCINE_RICH_REPEAT_CONTAINING_RECEPTOR_NLR_SIGNALING_PATHWAYS	REACTOME_NUCLEOTIDE_BINDING_DOMAIN_LEUCINE_RICH_REPEAT_CONTAINING_RECEPTOR_NLR_SIGNALING_PATHWAYS	REACTOME_NUCLEOTIDE_BINDING_DOMAIN_LEUCINE_RICH_REPEAT_CONTAINING_RECEPTOR_NLR_SIGNALING_PATHWAYS	1/167	37/4668	0.741607	0.988549	0.936971	Map2k6	1	REACTOME	up	NP
REACTOME_REGULATION_OF_INSULIN_SECRETION	REACTOME_REGULATION_OF_INSULIN_SECRETION	REACTOME_REGULATION_OF_INSULIN_SECRETION	1/167	37/4668	0.741607	0.988549	0.936971	Cd36	1	REACTOME	up	NP
REACTOME_SIGNALING_BY_EGFR	REACTOME_SIGNALING_BY_EGFR	REACTOME_SIGNALING_BY_EGFR	1/167	37/4668	0.741607	0.988549	0.936971	Adam12	1	REACTOME	up	NP
REACTOME_SIGNALING_BY_RECEPTOR_TYROSINE_KINASES	REACTOME_SIGNALING_BY_RECEPTOR_TYROSINE_KINASES	REACTOME_SIGNALING_BY_RECEPTOR_TYROSINE_KINASES	9/167	296/4668	0.742551	0.988549	0.936971	Apoe/Irs2/Psen2/Klb/Cxcl12/Nrp2/Junb/Jund/Adam12	9	REACTOME	up	NP
REACTOME_G2_M_CHECKPOINTS	REACTOME_G2_M_CHECKPOINTS	REACTOME_G2_M_CHECKPOINTS	2/167	74/4668	0.749678	0.988549	0.936971	Psmd9/Blm	2	REACTOME	up	NP
REACTOME_COMPLEMENT_CASCADE	REACTOME_COMPLEMENT_CASCADE	REACTOME_COMPLEMENT_CASCADE	1/167	38/4668	0.750925	0.988549	0.936971	Cd81	1	REACTOME	up	NP
REACTOME_IRE1ALPHA_ACTIVATES_CHAPERONES	REACTOME_IRE1ALPHA_ACTIVATES_CHAPERONES	REACTOME_IRE1ALPHA_ACTIVATES_CHAPERONES	1/167	38/4668	0.750925	0.988549	0.936971	Sult1a1	1	REACTOME	up	NP
REACTOME_MITOCHONDRIAL_PROTEIN_IMPORT	REACTOME_MITOCHONDRIAL_PROTEIN_IMPORT	REACTOME_MITOCHONDRIAL_PROTEIN_IMPORT	1/167	38/4668	0.750925	0.988549	0.936971	Chchd2	1	REACTOME	up	NP
REACTOME_SCF_SKP2_MEDIATED_DEGRADATION_OF_P27_P21	REACTOME_SCF_SKP2_MEDIATED_DEGRADATION_OF_P27_P21	REACTOME_SCF_SKP2_MEDIATED_DEGRADATION_OF_P27_P21	1/167	38/4668	0.750925	0.988549	0.936971	Psmd9	1	REACTOME	up	NP
REACTOME_TRANSLATION_OF_SARS_COV_2_STRUCTURAL_PROTEINS	REACTOME_TRANSLATION_OF_SARS_COV_2_STRUCTURAL_PROTEINS	REACTOME_TRANSLATION_OF_SARS_COV_2_STRUCTURAL_PROTEINS	1/167	38/4668	0.750925	0.988549	0.936971	St6gal1	1	REACTOME	up	NP
REACTOME_PROTEIN_LOCALIZATION	REACTOME_PROTEIN_LOCALIZATION	REACTOME_PROTEIN_LOCALIZATION	3/167	109/4668	0.755536	0.988549	0.936971	Agxt/Pxmp2/Chchd2	3	REACTOME	up	NP
REACTOME_NEGATIVE_REGULATION_OF_NOTCH4_SIGNALING	REACTOME_NEGATIVE_REGULATION_OF_NOTCH4_SIGNALING	REACTOME_NEGATIVE_REGULATION_OF_NOTCH4_SIGNALING	1/167	39/4668	0.759909	0.988549	0.936971	Psmd9	1	REACTOME	up	NP
REACTOME_PLATELET_HOMEOSTASIS	REACTOME_PLATELET_HOMEOSTASIS	REACTOME_PLATELET_HOMEOSTASIS	1/167	39/4668	0.759909	0.988549	0.936971	Prkg1	1	REACTOME	up	NP
REACTOME_AUF1_HNRNP_D0_BINDS_AND_DESTABILIZES_MRNA	REACTOME_AUF1_HNRNP_D0_BINDS_AND_DESTABILIZES_MRNA	REACTOME_AUF1_HNRNP_D0_BINDS_AND_DESTABILIZES_MRNA	1/167	40/4668	0.768571	0.988549	0.936971	Psmd9	1	REACTOME	up	NP
REACTOME_CDT1_ASSOCIATION_WITH_THE_CDC6_ORC_ORIGIN_COMPLEX	REACTOME_CDT1_ASSOCIATION_WITH_THE_CDC6_ORC_ORIGIN_COMPLEX	REACTOME_CDT1_ASSOCIATION_WITH_THE_CDC6_ORC_ORIGIN_COMPLEX	1/167	40/4668	0.768571	0.988549	0.936971	Psmd9	1	REACTOME	up	NP
REACTOME_GENE_SILENCING_BY_RNA	REACTOME_GENE_SILENCING_BY_RNA	REACTOME_GENE_SILENCING_BY_RNA	1/167	40/4668	0.768571	0.988549	0.936971	H3f3b	1	REACTOME	up	NP
REACTOME_HEME_SIGNALING	REACTOME_HEME_SIGNALING	REACTOME_HEME_SIGNALING	1/167	40/4668	0.768571	0.988549	0.936971	Npas2	1	REACTOME	up	NP
REACTOME_METABOLISM_OF_POLYAMINES	REACTOME_METABOLISM_OF_POLYAMINES	REACTOME_METABOLISM_OF_POLYAMINES	1/167	40/4668	0.768571	0.988549	0.936971	Psmd9	1	REACTOME	up	NP
REACTOME_MITOCHONDRIAL_BIOGENESIS	REACTOME_MITOCHONDRIAL_BIOGENESIS	REACTOME_MITOCHONDRIAL_BIOGENESIS	2/167	77/4668	0.7692	0.988549	0.936971	Ppargc1b/Idh2	2	REACTOME	up	NP
REACTOME_MITOTIC_G1_PHASE_AND_G1_S_TRANSITION	REACTOME_MITOTIC_G1_PHASE_AND_G1_S_TRANSITION	REACTOME_MITOTIC_G1_PHASE_AND_G1_S_TRANSITION	2/167	77/4668	0.7692	0.988549	0.936971	Psmd9/Ccnd3	2	REACTOME	up	NP
REACTOME_DNA_REPAIR	REACTOME_DNA_REPAIR	REACTOME_DNA_REPAIR	4/167	146/4668	0.774571	0.988549	0.936971	Blm/Rad51b/Gtf2h5/Msh2	4	REACTOME	up	NP
REACTOME_AURKA_ACTIVATION_BY_TPX2	REACTOME_AURKA_ACTIVATION_BY_TPX2	REACTOME_AURKA_ACTIVATION_BY_TPX2	1/167	41/4668	0.776922	0.988549	0.936971	Nde1	1	REACTOME	up	NP
REACTOME_DEGRADATION_OF_AXIN	REACTOME_DEGRADATION_OF_AXIN	REACTOME_DEGRADATION_OF_AXIN	1/167	41/4668	0.776922	0.988549	0.936971	Psmd9	1	REACTOME	up	NP
REACTOME_DEGRADATION_OF_DVL	REACTOME_DEGRADATION_OF_DVL	REACTOME_DEGRADATION_OF_DVL	1/167	41/4668	0.776922	0.988549	0.936971	Psmd9	1	REACTOME	up	NP
REACTOME_GLYCOLYSIS	REACTOME_GLYCOLYSIS	REACTOME_GLYCOLYSIS	1/167	41/4668	0.776922	0.988549	0.936971	Pfkfb1	1	REACTOME	up	NP
REACTOME_REGULATION_OF_RUNX3_EXPRESSION_AND_ACTIVITY	REACTOME_REGULATION_OF_RUNX3_EXPRESSION_AND_ACTIVITY	REACTOME_REGULATION_OF_RUNX3_EXPRESSION_AND_ACTIVITY	1/167	41/4668	0.776922	0.988549	0.936971	Psmd9	1	REACTOME	up	NP
REACTOME_TRANSCRIPTION_COUPLED_NUCLEOTIDE_EXCISION_REPAIR_TC_NER	REACTOME_TRANSCRIPTION_COUPLED_NUCLEOTIDE_EXCISION_REPAIR_TC_NER	REACTOME_TRANSCRIPTION_COUPLED_NUCLEOTIDE_EXCISION_REPAIR_TC_NER	1/167	41/4668	0.776922	0.988549	0.936971	Gtf2h5	1	REACTOME	up	NP
REACTOME_TRANSCRIPTION_OF_THE_HIV_GENOME	REACTOME_TRANSCRIPTION_OF_THE_HIV_GENOME	REACTOME_TRANSCRIPTION_OF_THE_HIV_GENOME	1/167	41/4668	0.776922	0.988549	0.936971	Gtf2h5	1	REACTOME	up	NP
REACTOME_TRANSCRIPTIONAL_REGULATION_BY_RUNX2	REACTOME_TRANSCRIPTIONAL_REGULATION_BY_RUNX2	REACTOME_TRANSCRIPTIONAL_REGULATION_BY_RUNX2	2/167	79/4668	0.781472	0.988549	0.936971	Psmd9/Ppargc1b	2	REACTOME	up	NP
REACTOME_ORC1_REMOVAL_FROM_CHROMATIN	REACTOME_ORC1_REMOVAL_FROM_CHROMATIN	REACTOME_ORC1_REMOVAL_FROM_CHROMATIN	1/167	42/4668	0.784973	0.988549	0.936971	Psmd9	1	REACTOME	up	NP
REACTOME_SIGNALING_BY_FGFR	REACTOME_SIGNALING_BY_FGFR	REACTOME_SIGNALING_BY_FGFR	1/167	42/4668	0.784973	0.988549	0.936971	Klb	1	REACTOME	up	NP
REACTOME_STABILIZATION_OF_P53	REACTOME_STABILIZATION_OF_P53	REACTOME_STABILIZATION_OF_P53	1/167	42/4668	0.784973	0.988549	0.936971	Psmd9	1	REACTOME	up	NP
REACTOME_DECTIN_1_MEDIATED_NONCANONICAL_NF_KB_SIGNALING	REACTOME_DECTIN_1_MEDIATED_NONCANONICAL_NF_KB_SIGNALING	REACTOME_DECTIN_1_MEDIATED_NONCANONICAL_NF_KB_SIGNALING	1/167	43/4668	0.792736	0.988549	0.936971	Psmd9	1	REACTOME	up	NP
REACTOME_THE_ROLE_OF_GTSE1_IN_G2_M_PROGRESSION_AFTER_G2_CHECKPOINT	REACTOME_THE_ROLE_OF_GTSE1_IN_G2_M_PROGRESSION_AFTER_G2_CHECKPOINT	REACTOME_THE_ROLE_OF_GTSE1_IN_G2_M_PROGRESSION_AFTER_G2_CHECKPOINT	1/167	43/4668	0.792736	0.988549	0.936971	Psmd9	1	REACTOME	up	NP
REACTOME_TRANSPORT_OF_INORGANIC_CATIONS_ANIONS_AND_AMINO_ACIDS_OLIGOPEPTIDES	REACTOME_TRANSPORT_OF_INORGANIC_CATIONS_ANIONS_AND_AMINO_ACIDS_OLIGOPEPTIDES	REACTOME_TRANSPORT_OF_INORGANIC_CATIONS_ANIONS_AND_AMINO_ACIDS_OLIGOPEPTIDES	1/167	43/4668	0.792736	0.988549	0.936971	Slc17a8	1	REACTOME	up	NP
REACTOME_CLASS_I_MHC_MEDIATED_ANTIGEN_PROCESSING_PRESENTATION	REACTOME_CLASS_I_MHC_MEDIATED_ANTIGEN_PROCESSING_PRESENTATION	REACTOME_CLASS_I_MHC_MEDIATED_ANTIGEN_PROCESSING_PRESENTATION	7/167	249/4668	0.797101	0.988549	0.936971	Fgg/Ctsl/Fgb/Fga/Psmd9/Cd36/Fbxo31	7	REACTOME	up	NP
REACTOME_DEFECTIVE_CFTR_CAUSES_CYSTIC_FIBROSIS	REACTOME_DEFECTIVE_CFTR_CAUSES_CYSTIC_FIBROSIS	REACTOME_DEFECTIVE_CFTR_CAUSES_CYSTIC_FIBROSIS	1/167	44/4668	0.80022	0.988549	0.936971	Psmd9	1	REACTOME	up	NP
REACTOME_DEGRADATION_OF_GLI1_BY_THE_PROTEASOME	REACTOME_DEGRADATION_OF_GLI1_BY_THE_PROTEASOME	REACTOME_DEGRADATION_OF_GLI1_BY_THE_PROTEASOME	1/167	44/4668	0.80022	0.988549	0.936971	Psmd9	1	REACTOME	up	NP
REACTOME_G1_S_DNA_DAMAGE_CHECKPOINTS	REACTOME_G1_S_DNA_DAMAGE_CHECKPOINTS	REACTOME_G1_S_DNA_DAMAGE_CHECKPOINTS	1/167	44/4668	0.80022	0.988549	0.936971	Psmd9	1	REACTOME	up	NP
REACTOME_HEDGEHOG_LIGAND_BIOGENESIS	REACTOME_HEDGEHOG_LIGAND_BIOGENESIS	REACTOME_HEDGEHOG_LIGAND_BIOGENESIS	1/167	44/4668	0.80022	0.988549	0.936971	Psmd9	1	REACTOME	up	NP
REACTOME_PARASITE_INFECTION	REACTOME_PARASITE_INFECTION	REACTOME_PARASITE_INFECTION	1/167	44/4668	0.80022	0.988549	0.936971	Wipf3	1	REACTOME	up	NP
REACTOME_SIGNALING_BY_WNT	REACTOME_SIGNALING_BY_WNT	REACTOME_SIGNALING_BY_WNT	4/167	153/4668	0.805114	0.988549	0.936971	H3f3b/Psmd9/Prickle1/Prkg1	4	REACTOME	up	NP
REACTOME_RHOB_GTPASE_CYCLE	REACTOME_RHOB_GTPASE_CYCLE	REACTOME_RHOB_GTPASE_CYCLE	1/167	45/4668	0.807435	0.988549	0.936971	Dlc1	1	REACTOME	up	NP
REACTOME_EUKARYOTIC_TRANSLATION_ELONGATION	REACTOME_EUKARYOTIC_TRANSLATION_ELONGATION	REACTOME_EUKARYOTIC_TRANSLATION_ELONGATION	2/167	84/4668	0.80969	0.988549	0.936971	Rps23/Rpl7	2	REACTOME	up	NP
REACTOME_SLC_TRANSPORTER_DISORDERS	REACTOME_SLC_TRANSPORTER_DISORDERS	REACTOME_SLC_TRANSPORTER_DISORDERS	1/167	46/4668	0.814391	0.988549	0.936971	Slc17a8	1	REACTOME	up	NP
REACTOME_REGULATION_OF_HMOX1_EXPRESSION_AND_ACTIVITY	REACTOME_REGULATION_OF_HMOX1_EXPRESSION_AND_ACTIVITY	REACTOME_REGULATION_OF_HMOX1_EXPRESSION_AND_ACTIVITY	1/167	47/4668	0.821097	0.988549	0.936971	Psmd9	1	REACTOME	up	NP
REACTOME_SIGNALING_BY_ALK_IN_CANCER	REACTOME_SIGNALING_BY_ALK_IN_CANCER	REACTOME_SIGNALING_BY_ALK_IN_CANCER	1/167	47/4668	0.821097	0.988549	0.936971	Junb	1	REACTOME	up	NP
REACTOME_TRANSMISSION_ACROSS_CHEMICAL_SYNAPSES	REACTOME_TRANSMISSION_ACROSS_CHEMICAL_SYNAPSES	REACTOME_TRANSMISSION_ACROSS_CHEMICAL_SYNAPSES	2/167	87/4668	0.82503	0.988549	0.936971	Abat/Bche	2	REACTOME	up	NP
REACTOME_DDX58_IFIH1_MEDIATED_INDUCTION_OF_INTERFERON_ALPHA_BETA	REACTOME_DDX58_IFIH1_MEDIATED_INDUCTION_OF_INTERFERON_ALPHA_BETA	REACTOME_DDX58_IFIH1_MEDIATED_INDUCTION_OF_INTERFERON_ALPHA_BETA	1/167	48/4668	0.827563	0.988549	0.936971	Rnf125	1	REACTOME	up	NP
REACTOME_RECRUITMENT_OF_MITOTIC_CENTROSOME_PROTEINS_AND_COMPLEXES	REACTOME_RECRUITMENT_OF_MITOTIC_CENTROSOME_PROTEINS_AND_COMPLEXES	REACTOME_RECRUITMENT_OF_MITOTIC_CENTROSOME_PROTEINS_AND_COMPLEXES	1/167	48/4668	0.827563	0.988549	0.936971	Nde1	1	REACTOME	up	NP
REACTOME_PEROXISOMAL_PROTEIN_IMPORT	REACTOME_PEROXISOMAL_PROTEIN_IMPORT	REACTOME_PEROXISOMAL_PROTEIN_IMPORT	1/167	49/4668	0.833796	0.988549	0.936971	Agxt	1	REACTOME	up	NP
REACTOME_RECRUITMENT_OF_NUMA_TO_MITOTIC_CENTROSOMES	REACTOME_RECRUITMENT_OF_NUMA_TO_MITOTIC_CENTROSOMES	REACTOME_RECRUITMENT_OF_NUMA_TO_MITOTIC_CENTROSOMES	1/167	49/4668	0.833796	0.988549	0.936971	Nde1	1	REACTOME	up	NP
REACTOME_RESPONSE_OF_EIF2AK4_GCN2_TO_AMINO_ACID_DEFICIENCY	REACTOME_RESPONSE_OF_EIF2AK4_GCN2_TO_AMINO_ACID_DEFICIENCY	REACTOME_RESPONSE_OF_EIF2AK4_GCN2_TO_AMINO_ACID_DEFICIENCY	2/167	90/4668	0.839257	0.988549	0.936971	Rps23/Rpl7	2	REACTOME	up	NP
REACTOME_ACTIVATION_OF_THE_MRNA_UPON_BINDING_OF_THE_CAP_BINDING_COMPLEX_AND_EIFS_AND_SUBSEQUENT_BINDING_TO_43S	REACTOME_ACTIVATION_OF_THE_MRNA_UPON_BINDING_OF_THE_CAP_BINDING_COMPLEX_AND_EIFS_AND_SUBSEQUENT_BINDING_TO_43S	REACTOME_ACTIVATION_OF_THE_MRNA_UPON_BINDING_OF_THE_CAP_BINDING_COMPLEX_AND_EIFS_AND_SUBSEQUENT_BINDING_TO_43S	1/167	50/4668	0.839805	0.988549	0.936971	Rps23	1	REACTOME	up	NP
REACTOME_RESOLUTION_OF_SISTER_CHROMATID_COHESION	REACTOME_RESOLUTION_OF_SISTER_CHROMATID_COHESION	REACTOME_RESOLUTION_OF_SISTER_CHROMATID_COHESION	1/167	50/4668	0.839805	0.988549	0.936971	Nde1	1	REACTOME	up	NP
REACTOME_RHOC_GTPASE_CYCLE	REACTOME_RHOC_GTPASE_CYCLE	REACTOME_RHOC_GTPASE_CYCLE	1/167	50/4668	0.839805	0.988549	0.936971	Dlc1	1	REACTOME	up	NP
REACTOME_PROGRAMMED_CELL_DEATH	REACTOME_PROGRAMMED_CELL_DEATH	REACTOME_PROGRAMMED_CELL_DEATH	3/167	127/4668	0.840093	0.988549	0.936971	Psmd9/Il18/Bcl2l11	3	REACTOME	up	NP
REACTOME_GLOBAL_GENOME_NUCLEOTIDE_EXCISION_REPAIR_GG_NER	REACTOME_GLOBAL_GENOME_NUCLEOTIDE_EXCISION_REPAIR_GG_NER	REACTOME_GLOBAL_GENOME_NUCLEOTIDE_EXCISION_REPAIR_GG_NER	1/167	51/4668	0.845598	0.988549	0.936971	Gtf2h5	1	REACTOME	up	NP
REACTOME_REGULATION_OF_PTEN_STABILITY_AND_ACTIVITY	REACTOME_REGULATION_OF_PTEN_STABILITY_AND_ACTIVITY	REACTOME_REGULATION_OF_PTEN_STABILITY_AND_ACTIVITY	1/167	51/4668	0.845598	0.988549	0.936971	Psmd9	1	REACTOME	up	NP
REACTOME_SPHINGOLIPID_METABOLISM	REACTOME_SPHINGOLIPID_METABOLISM	REACTOME_SPHINGOLIPID_METABOLISM	1/167	51/4668	0.845598	0.988549	0.936971	Neu2	1	REACTOME	up	NP
REACTOME_TNFR2_NON_CANONICAL_NF_KB_PATHWAY	REACTOME_TNFR2_NON_CANONICAL_NF_KB_PATHWAY	REACTOME_TNFR2_NON_CANONICAL_NF_KB_PATHWAY	1/167	51/4668	0.845598	0.988549	0.936971	Psmd9	1	REACTOME	up	NP
REACTOME_APC_C_CDH1_MEDIATED_DEGRADATION_OF_CDC20_AND_OTHER_APC_C_CDH1_TARGETED_PROTEINS_IN_LATE_MITOSIS_EARLY_G1	REACTOME_APC_C_CDH1_MEDIATED_DEGRADATION_OF_CDC20_AND_OTHER_APC_C_CDH1_TARGETED_PROTEINS_IN_LATE_MITOSIS_EARLY_G1	REACTOME_APC_C_CDH1_MEDIATED_DEGRADATION_OF_CDC20_AND_OTHER_APC_C_CDH1_TARGETED_PROTEINS_IN_LATE_MITOSIS_EARLY_G1	1/167	52/4668	0.851183	0.988549	0.936971	Psmd9	1	REACTOME	up	NP
REACTOME_MITOTIC_SPINDLE_CHECKPOINT	REACTOME_MITOTIC_SPINDLE_CHECKPOINT	REACTOME_MITOTIC_SPINDLE_CHECKPOINT	1/167	52/4668	0.851183	0.988549	0.936971	Nde1	1	REACTOME	up	NP
REACTOME_REGULATION_OF_PLK1_ACTIVITY_AT_G2_M_TRANSITION	REACTOME_REGULATION_OF_PLK1_ACTIVITY_AT_G2_M_TRANSITION	REACTOME_REGULATION_OF_PLK1_ACTIVITY_AT_G2_M_TRANSITION	1/167	52/4668	0.851183	0.988549	0.936971	Nde1	1	REACTOME	up	NP
REACTOME_SUMOYLATION_OF_DNA_DAMAGE_RESPONSE_AND_REPAIR_PROTEINS	REACTOME_SUMOYLATION_OF_DNA_DAMAGE_RESPONSE_AND_REPAIR_PROTEINS	REACTOME_SUMOYLATION_OF_DNA_DAMAGE_RESPONSE_AND_REPAIR_PROTEINS	1/167	52/4668	0.851183	0.988549	0.936971	Blm	1	REACTOME	up	NP
REACTOME_CYCLIN_A_CDK2_ASSOCIATED_EVENTS_AT_S_PHASE_ENTRY	REACTOME_CYCLIN_A_CDK2_ASSOCIATED_EVENTS_AT_S_PHASE_ENTRY	REACTOME_CYCLIN_A_CDK2_ASSOCIATED_EVENTS_AT_S_PHASE_ENTRY	1/167	53/4668	0.856567	0.988549	0.936971	Psmd9	1	REACTOME	up	NP
REACTOME_HEDGEHOG_ON_STATE	REACTOME_HEDGEHOG_ON_STATE	REACTOME_HEDGEHOG_ON_STATE	1/167	53/4668	0.856567	0.988549	0.936971	Psmd9	1	REACTOME	up	NP
REACTOME_FC_EPSILON_RECEPTOR_FCERI_SIGNALING	REACTOME_FC_EPSILON_RECEPTOR_FCERI_SIGNALING	REACTOME_FC_EPSILON_RECEPTOR_FCERI_SIGNALING	2/167	94/4668	0.856605	0.988549	0.936971	Psmd9/Jun	2	REACTOME	up	NP
REACTOME_CELL_CYCLE_CHECKPOINTS	REACTOME_CELL_CYCLE_CHECKPOINTS	REACTOME_CELL_CYCLE_CHECKPOINTS	3/167	132/4668	0.858607	0.988549	0.936971	Psmd9/Blm/Nde1	3	REACTOME	up	NP
REACTOME_ANCHORING_OF_THE_BASAL_BODY_TO_THE_PLASMA_MEMBRANE	REACTOME_ANCHORING_OF_THE_BASAL_BODY_TO_THE_PLASMA_MEMBRANE	REACTOME_ANCHORING_OF_THE_BASAL_BODY_TO_THE_PLASMA_MEMBRANE	1/167	54/4668	0.861757	0.988549	0.936971	Nde1	1	REACTOME	up	NP
REACTOME_RESPIRATORY_ELECTRON_TRANSPORT_ATP_SYNTHESIS_BY_CHEMIOSMOTIC_COUPLING_AND_HEAT_PRODUCTION_BY_UNCOUPLING_PROTEINS	REACTOME_RESPIRATORY_ELECTRON_TRANSPORT_ATP_SYNTHESIS_BY_CHEMIOSMOTIC_COUPLING_AND_HEAT_PRODUCTION_BY_UNCOUPLING_PROTEINS	REACTOME_RESPIRATORY_ELECTRON_TRANSPORT_ATP_SYNTHESIS_BY_CHEMIOSMOTIC_COUPLING_AND_HEAT_PRODUCTION_BY_UNCOUPLING_PROTEINS	2/167	96/4668	0.864626	0.988549	0.936971	Pm20d1/Coq10b	2	REACTOME	up	NP
REACTOME_ABC_TRANSPORTER_DISORDERS	REACTOME_ABC_TRANSPORTER_DISORDERS	REACTOME_ABC_TRANSPORTER_DISORDERS	1/167	55/4668	0.866761	0.988549	0.936971	Psmd9	1	REACTOME	up	NP
REACTOME_APC_C_MEDIATED_DEGRADATION_OF_CELL_CYCLE_PROTEINS	REACTOME_APC_C_MEDIATED_DEGRADATION_OF_CELL_CYCLE_PROTEINS	REACTOME_APC_C_MEDIATED_DEGRADATION_OF_CELL_CYCLE_PROTEINS	1/167	56/4668	0.871584	0.988549	0.936971	Psmd9	1	REACTOME	up	NP
REACTOME_EPH_EPHRIN_SIGNALING	REACTOME_EPH_EPHRIN_SIGNALING	REACTOME_EPH_EPHRIN_SIGNALING	1/167	56/4668	0.871584	0.988549	0.936971	Psen2	1	REACTOME	up	NP
REACTOME_SWITCHING_OF_ORIGINS_TO_A_POST_REPLICATIVE_STATE	REACTOME_SWITCHING_OF_ORIGINS_TO_A_POST_REPLICATIVE_STATE	REACTOME_SWITCHING_OF_ORIGINS_TO_A_POST_REPLICATIVE_STATE	1/167	56/4668	0.871584	0.988549	0.936971	Psmd9	1	REACTOME	up	NP
REACTOME_NONSENSE_MEDIATED_DECAY_NMD	REACTOME_NONSENSE_MEDIATED_DECAY_NMD	REACTOME_NONSENSE_MEDIATED_DECAY_NMD	2/167	98/4668	0.872237	0.988549	0.936971	Rps23/Rpl7	2	REACTOME	up	NP
REACTOME_RHO_GTPASE_EFFECTORS	REACTOME_RHO_GTPASE_EFFECTORS	REACTOME_RHO_GTPASE_EFFECTORS	3/167	138/4668	0.878342	0.988549	0.936971	H3f3b/Wipf3/Nde1	3	REACTOME	up	NP
REACTOME_EUKARYOTIC_TRANSLATION_INITIATION	REACTOME_EUKARYOTIC_TRANSLATION_INITIATION	REACTOME_EUKARYOTIC_TRANSLATION_INITIATION	2/167	100/4668	0.879454	0.988549	0.936971	Rps23/Rpl7	2	REACTOME	up	NP
REACTOME_TCF_DEPENDENT_SIGNALING_IN_RESPONSE_TO_WNT	REACTOME_TCF_DEPENDENT_SIGNALING_IN_RESPONSE_TO_WNT	REACTOME_TCF_DEPENDENT_SIGNALING_IN_RESPONSE_TO_WNT	2/167	100/4668	0.879454	0.988549	0.936971	H3f3b/Psmd9	2	REACTOME	up	NP
REACTOME_DISORDERS_OF_TRANSMEMBRANE_TRANSPORTERS	REACTOME_DISORDERS_OF_TRANSMEMBRANE_TRANSPORTERS	REACTOME_DISORDERS_OF_TRANSMEMBRANE_TRANSPORTERS	2/167	101/4668	0.882921	0.988549	0.936971	Psmd9/Slc17a8	2	REACTOME	up	NP
REACTOME_RHOA_GTPASE_CYCLE	REACTOME_RHOA_GTPASE_CYCLE	REACTOME_RHOA_GTPASE_CYCLE	2/167	101/4668	0.882921	0.988549	0.936971	Fam13a/Dlc1	2	REACTOME	up	NP
REACTOME_SEPARATION_OF_SISTER_CHROMATIDS	REACTOME_SEPARATION_OF_SISTER_CHROMATIDS	REACTOME_SEPARATION_OF_SISTER_CHROMATIDS	2/167	101/4668	0.882921	0.988549	0.936971	Psmd9/Nde1	2	REACTOME	up	NP
REACTOME_SRP_DEPENDENT_COTRANSLATIONAL_PROTEIN_TARGETING_TO_MEMBRANE	REACTOME_SRP_DEPENDENT_COTRANSLATIONAL_PROTEIN_TARGETING_TO_MEMBRANE	REACTOME_SRP_DEPENDENT_COTRANSLATIONAL_PROTEIN_TARGETING_TO_MEMBRANE	2/167	101/4668	0.882921	0.988549	0.936971	Rps23/Rpl7	2	REACTOME	up	NP
REACTOME_DEGRADATION_OF_BETA_CATENIN_BY_THE_DESTRUCTION_COMPLEX	REACTOME_DEGRADATION_OF_BETA_CATENIN_BY_THE_DESTRUCTION_COMPLEX	REACTOME_DEGRADATION_OF_BETA_CATENIN_BY_THE_DESTRUCTION_COMPLEX	1/167	59/4668	0.885038	0.988549	0.936971	Psmd9	1	REACTOME	up	NP
REACTOME_FCERI_MEDIATED_NF_KB_ACTIVATION	REACTOME_FCERI_MEDIATED_NF_KB_ACTIVATION	REACTOME_FCERI_MEDIATED_NF_KB_ACTIVATION	1/167	59/4668	0.885038	0.988549	0.936971	Psmd9	1	REACTOME	up	NP
REACTOME_MITOTIC_PROPHASE	REACTOME_MITOTIC_PROPHASE	REACTOME_MITOTIC_PROPHASE	1/167	59/4668	0.885038	0.988549	0.936971	H3f3b	1	REACTOME	up	NP
REACTOME_RAC2_GTPASE_CYCLE	REACTOME_RAC2_GTPASE_CYCLE	REACTOME_RAC2_GTPASE_CYCLE	1/167	59/4668	0.885038	0.988549	0.936971	Nhs	1	REACTOME	up	NP
REACTOME_DOWNSTREAM_SIGNALING_EVENTS_OF_B_CELL_RECEPTOR_BCR	REACTOME_DOWNSTREAM_SIGNALING_EVENTS_OF_B_CELL_RECEPTOR_BCR	REACTOME_DOWNSTREAM_SIGNALING_EVENTS_OF_B_CELL_RECEPTOR_BCR	1/167	60/4668	0.889203	0.988549	0.936971	Psmd9	1	REACTOME	up	NP
REACTOME_HCMV_INFECTION	REACTOME_HCMV_INFECTION	REACTOME_HCMV_INFECTION	1/167	60/4668	0.889203	0.988549	0.936971	Cebpd	1	REACTOME	up	NP
REACTOME_CDC42_GTPASE_CYCLE	REACTOME_CDC42_GTPASE_CYCLE	REACTOME_CDC42_GTPASE_CYCLE	2/167	103/4668	0.889581	0.988549	0.936971	Dlc1/Wipf3	2	REACTOME	up	NP
REACTOME_MHC_CLASS_II_ANTIGEN_PRESENTATION	REACTOME_MHC_CLASS_II_ANTIGEN_PRESENTATION	REACTOME_MHC_CLASS_II_ANTIGEN_PRESENTATION	1/167	61/4668	0.893219	0.988549	0.936971	Ctsl	1	REACTOME	up	NP
REACTOME_RHO_GTPASES_ACTIVATE_FORMINS	REACTOME_RHO_GTPASES_ACTIVATE_FORMINS	REACTOME_RHO_GTPASES_ACTIVATE_FORMINS	1/167	61/4668	0.893219	0.988549	0.936971	Nde1	1	REACTOME	up	NP
REACTOME_FCGAMMA_RECEPTOR_FCGR_DEPENDENT_PHAGOCYTOSIS	REACTOME_FCGAMMA_RECEPTOR_FCGR_DEPENDENT_PHAGOCYTOSIS	REACTOME_FCGAMMA_RECEPTOR_FCGR_DEPENDENT_PHAGOCYTOSIS	1/167	62/4668	0.897089	0.988549	0.936971	Wipf3	1	REACTOME	up	NP
REACTOME_HEDGEHOG_OFF_STATE	REACTOME_HEDGEHOG_OFF_STATE	REACTOME_HEDGEHOG_OFF_STATE	1/167	63/4668	0.900821	0.988549	0.936971	Psmd9	1	REACTOME	up	NP
REACTOME_NUCLEOTIDE_EXCISION_REPAIR	REACTOME_NUCLEOTIDE_EXCISION_REPAIR	REACTOME_NUCLEOTIDE_EXCISION_REPAIR	1/167	63/4668	0.900821	0.988549	0.936971	Gtf2h5	1	REACTOME	up	NP
REACTOME_RAC3_GTPASE_CYCLE	REACTOME_RAC3_GTPASE_CYCLE	REACTOME_RAC3_GTPASE_CYCLE	1/167	63/4668	0.900821	0.988549	0.936971	Nhs	1	REACTOME	up	NP
REACTOME_SYNTHESIS_OF_DNA	REACTOME_SYNTHESIS_OF_DNA	REACTOME_SYNTHESIS_OF_DNA	1/167	64/4668	0.904417	0.989252	0.937636	Psmd9	1	REACTOME	up	NP
REACTOME_CARGO_RECOGNITION_FOR_CLATHRIN_MEDIATED_ENDOCYTOSIS	REACTOME_CARGO_RECOGNITION_FOR_CLATHRIN_MEDIATED_ENDOCYTOSIS	REACTOME_CARGO_RECOGNITION_FOR_CLATHRIN_MEDIATED_ENDOCYTOSIS	1/167	65/4668	0.907885	0.989252	0.937636	Trf	1	REACTOME	up	NP
REACTOME_TP53_REGULATES_METABOLIC_GENES	REACTOME_TP53_REGULATES_METABOLIC_GENES	REACTOME_TP53_REGULATES_METABOLIC_GENES	1/167	65/4668	0.907885	0.989252	0.937636	Prdx5	1	REACTOME	up	NP
REACTOME_APOPTOSIS	REACTOME_APOPTOSIS	REACTOME_APOPTOSIS	2/167	110/4668	0.910233	0.989477	0.93785	Psmd9/Bcl2l11	2	REACTOME	up	NP
REACTOME_COPI_MEDIATED_ANTEROGRADE_TRANSPORT	REACTOME_COPI_MEDIATED_ANTEROGRADE_TRANSPORT	REACTOME_COPI_MEDIATED_ANTEROGRADE_TRANSPORT	1/167	68/4668	0.917553	0.990183	0.938519	Ank3	1	REACTOME	up	NP
REACTOME_MITOTIC_G2_G2_M_PHASES	REACTOME_MITOTIC_G2_G2_M_PHASES	REACTOME_MITOTIC_G2_G2_M_PHASES	2/167	113/4668	0.917933	0.990183	0.938519	Psmd9/Nde1	2	REACTOME	up	NP
REACTOME_SARS_COV_INFECTIONS	REACTOME_SARS_COV_INFECTIONS	REACTOME_SARS_COV_INFECTIONS	2/167	113/4668	0.917933	0.990183	0.938519	Ctsl/St6gal1	2	REACTOME	up	NP
REACTOME_UB_SPECIFIC_PROCESSING_PROTEASES	REACTOME_UB_SPECIFIC_PROCESSING_PROTEASES	REACTOME_UB_SPECIFIC_PROCESSING_PROTEASES	2/167	115/4668	0.922719	0.990183	0.938519	Psmd9/Smad7	2	REACTOME	up	NP
REACTOME_CLEC7A_DECTIN_1_SIGNALING	REACTOME_CLEC7A_DECTIN_1_SIGNALING	REACTOME_CLEC7A_DECTIN_1_SIGNALING	1/167	70/4668	0.923432	0.990183	0.938519	Psmd9	1	REACTOME	up	NP
REACTOME_CELLULAR_RESPONSE_TO_CHEMICAL_STRESS	REACTOME_CELLULAR_RESPONSE_TO_CHEMICAL_STRESS	REACTOME_CELLULAR_RESPONSE_TO_CHEMICAL_STRESS	2/167	117/4668	0.927242	0.990183	0.938519	Psmd9/Prdx5	2	REACTOME	up	NP
REACTOME_INFLUENZA_INFECTION	REACTOME_INFLUENZA_INFECTION	REACTOME_INFLUENZA_INFECTION	2/167	119/4668	0.931516	0.990183	0.938519	Rps23/Rpl7	2	REACTOME	up	NP
REACTOME_NEURONAL_SYSTEM	REACTOME_NEURONAL_SYSTEM	REACTOME_NEURONAL_SYSTEM	2/167	119/4668	0.931516	0.990183	0.938519	Abat/Bche	2	REACTOME	up	NP
REACTOME_CELLULAR_RESPONSE_TO_STARVATION	REACTOME_CELLULAR_RESPONSE_TO_STARVATION	REACTOME_CELLULAR_RESPONSE_TO_STARVATION	2/167	121/4668	0.935554	0.990183	0.938519	Rps23/Rpl7	2	REACTOME	up	NP
REACTOME_SIGNALING_BY_VEGF	REACTOME_SIGNALING_BY_VEGF	REACTOME_SIGNALING_BY_VEGF	1/167	76/4668	0.938681	0.990183	0.938519	Nrp2	1	REACTOME	up	NP
REACTOME_TRANSPORT_TO_THE_GOLGI_AND_SUBSEQUENT_MODIFICATION	REACTOME_TRANSPORT_TO_THE_GOLGI_AND_SUBSEQUENT_MODIFICATION	REACTOME_TRANSPORT_TO_THE_GOLGI_AND_SUBSEQUENT_MODIFICATION	2/167	123/4668	0.939366	0.990183	0.938519	Ank3/St6gal1	2	REACTOME	up	NP
REACTOME_SIGNALING_BY_THE_B_CELL_RECEPTOR_BCR	REACTOME_SIGNALING_BY_THE_B_CELL_RECEPTOR_BCR	REACTOME_SIGNALING_BY_THE_B_CELL_RECEPTOR_BCR	1/167	77/4668	0.940911	0.990183	0.938519	Psmd9	1	REACTOME	up	NP
REACTOME_TCR_SIGNALING	REACTOME_TCR_SIGNALING	REACTOME_TCR_SIGNALING	1/167	77/4668	0.940911	0.990183	0.938519	Psmd9	1	REACTOME	up	NP
REACTOME_RESPIRATORY_ELECTRON_TRANSPORT	REACTOME_RESPIRATORY_ELECTRON_TRANSPORT	REACTOME_RESPIRATORY_ELECTRON_TRANSPORT	1/167	79/4668	0.945132	0.990183	0.938519	Coq10b	1	REACTOME	up	NP
REACTOME_MITOTIC_METAPHASE_AND_ANAPHASE	REACTOME_MITOTIC_METAPHASE_AND_ANAPHASE	REACTOME_MITOTIC_METAPHASE_AND_ANAPHASE	2/167	127/4668	0.946361	0.990183	0.938519	Psmd9/Nde1	2	REACTOME	up	NP
REACTOME_PHOSPHOLIPID_METABOLISM	REACTOME_PHOSPHOLIPID_METABOLISM	REACTOME_PHOSPHOLIPID_METABOLISM	2/167	128/4668	0.947987	0.990183	0.938519	Bche/Gpd1l	2	REACTOME	up	NP
REACTOME_SIGNALING_BY_HEDGEHOG	REACTOME_SIGNALING_BY_HEDGEHOG	REACTOME_SIGNALING_BY_HEDGEHOG	1/167	81/4668	0.949053	0.990183	0.938519	Psmd9	1	REACTOME	up	NP
REACTOME_C_TYPE_LECTIN_RECEPTORS_CLRS	REACTOME_C_TYPE_LECTIN_RECEPTORS_CLRS	REACTOME_C_TYPE_LECTIN_RECEPTORS_CLRS	1/167	82/4668	0.950908	0.990183	0.938519	Psmd9	1	REACTOME	up	NP
REACTOME_ORGANELLE_BIOGENESIS_AND_MAINTENANCE	REACTOME_ORGANELLE_BIOGENESIS_AND_MAINTENANCE	REACTOME_ORGANELLE_BIOGENESIS_AND_MAINTENANCE	3/167	178/4668	0.958081	0.990183	0.938519	Ppargc1b/Idh2/Nde1	3	REACTOME	up	NP
REACTOME_RRNA_PROCESSING	REACTOME_RRNA_PROCESSING	REACTOME_RRNA_PROCESSING	2/167	135/4668	0.958124	0.990183	0.938519	Rps23/Rpl7	2	REACTOME	up	NP
REACTOME_NEDDYLATION	REACTOME_NEDDYLATION	REACTOME_NEDDYLATION	2/167	137/4668	0.960655	0.990183	0.938519	Psmd9/Fbxo31	2	REACTOME	up	NP
REACTOME_HOST_INTERACTIONS_OF_HIV_FACTORS	REACTOME_HOST_INTERACTIONS_OF_HIV_FACTORS	REACTOME_HOST_INTERACTIONS_OF_HIV_FACTORS	1/167	90/4668	0.963522	0.990183	0.938519	Psmd9	1	REACTOME	up	NP
REACTOME_HIV_LIFE_CYCLE	REACTOME_HIV_LIFE_CYCLE	REACTOME_HIV_LIFE_CYCLE	1/167	91/4668	0.964853	0.990183	0.938519	Gtf2h5	1	REACTOME	up	NP
REACTOME_S_PHASE	REACTOME_S_PHASE	REACTOME_S_PHASE	1/167	91/4668	0.964853	0.990183	0.938519	Psmd9	1	REACTOME	up	NP
REACTOME_CYTOPROTECTION_BY_HMOX1	REACTOME_CYTOPROTECTION_BY_HMOX1	REACTOME_CYTOPROTECTION_BY_HMOX1	1/167	95/4668	0.96971	0.990183	0.938519	Psmd9	1	REACTOME	up	NP
REACTOME_MITOTIC_PROMETAPHASE	REACTOME_MITOTIC_PROMETAPHASE	REACTOME_MITOTIC_PROMETAPHASE	1/167	96/4668	0.970816	0.990183	0.938519	Nde1	1	REACTOME	up	NP
REACTOME_ASPARAGINE_N_LINKED_GLYCOSYLATION	REACTOME_ASPARAGINE_N_LINKED_GLYCOSYLATION	REACTOME_ASPARAGINE_N_LINKED_GLYCOSYLATION	3/167	192/4668	0.971755	0.990183	0.938519	Ank3/St6gal1/Neu2	3	REACTOME	up	NP
REACTOME_CLATHRIN_MEDIATED_ENDOCYTOSIS	REACTOME_CLATHRIN_MEDIATED_ENDOCYTOSIS	REACTOME_CLATHRIN_MEDIATED_ENDOCYTOSIS	1/167	97/4668	0.971882	0.990183	0.938519	Trf	1	REACTOME	up	NP
REACTOME_HIV_INFECTION	REACTOME_HIV_INFECTION	REACTOME_HIV_INFECTION	2/167	149/4668	0.973037	0.990183	0.938519	Psmd9/Gtf2h5	2	REACTOME	up	NP
REACTOME_CILIUM_ASSEMBLY	REACTOME_CILIUM_ASSEMBLY	REACTOME_CILIUM_ASSEMBLY	1/167	101/4668	0.975773	0.990785	0.93909	Nde1	1	REACTOME	up	NP
REACTOME_ER_TO_GOLGI_ANTEROGRADE_TRANSPORT	REACTOME_ER_TO_GOLGI_ANTEROGRADE_TRANSPORT	REACTOME_ER_TO_GOLGI_ANTEROGRADE_TRANSPORT	1/167	108/4668	0.981337	0.992966	0.941157	Ank3	1	REACTOME	up	NP
REACTOME_M_PHASE	REACTOME_M_PHASE	REACTOME_M_PHASE	3/167	208/4668	0.98222	0.992966	0.941157	H3f3b/Psmd9/Nde1	3	REACTOME	up	NP
REACTOME_DEUBIQUITINATION	REACTOME_DEUBIQUITINATION	REACTOME_DEUBIQUITINATION	2/167	170/4668	0.986272	0.994792	0.942888	Psmd9/Smad7	2	REACTOME	up	NP
REACTOME_CELL_CYCLE_MITOTIC	REACTOME_CELL_CYCLE_MITOTIC	REACTOME_CELL_CYCLE_MITOTIC	4/167	266/4668	0.988333	0.994792	0.942888	H3f3b/Psmd9/Ccnd3/Nde1	4	REACTOME	up	NP
REACTOME_TRANSLATION	REACTOME_TRANSLATION	REACTOME_TRANSLATION	2/167	195/4668	0.993974	0.997389	0.945349	Rps23/Rpl7	2	REACTOME	up	NP
REACTOME_ANTIGEN_PROCESSING_UBIQUITINATION_PROTEASOME_DEGRADATION	REACTOME_ANTIGEN_PROCESSING_UBIQUITINATION_PROTEASOME_DEGRADATION	REACTOME_ANTIGEN_PROCESSING_UBIQUITINATION_PROTEASOME_DEGRADATION	2/167	202/4668	0.99523	0.997389	0.945349	Psmd9/Fbxo31	2	REACTOME	up	NP
REACTOME_CHROMATIN_MODIFYING_ENZYMES	REACTOME_CHROMATIN_MODIFYING_ENZYMES	REACTOME_CHROMATIN_MODIFYING_ENZYMES	1/167	161/4668	0.997446	0.997446	0.945404	Kdm2b	1	REACTOME	up	NP
GOBP_SMALL_MOLECULE_CATABOLIC_PROCESS	GOBP_SMALL_MOLECULE_CATABOLIC_PROCESS	GOBP_SMALL_MOLECULE_CATABOLIC_PROCESS	27/189	234/5089	9.16321e-08	2.9113e-05	2.52676e-05	Mat1a/Upp2/Cdo1/Sult1a1/Apoe/Akr1d1/Pah/Pon1/Abat/Ddah1/Rida/Irs2/Dhdh/Afmid/Amdhd1/Cyp27a1/Aldh6a1/Hal/Cyp3a11/Agxt/Got1/Cyp7a1/Ivd/Csad/Mccc2/Nqo2/Mcee	27	GO BP	up	NP
GOBP_CELLULAR_AMINO_ACID_METABOLIC_PROCESS	GOBP_CELLULAR_AMINO_ACID_METABOLIC_PROCESS	GOBP_CELLULAR_AMINO_ACID_METABOLIC_PROCESS	23/189	180/5089	1.39966e-07	2.9113e-05	2.52676e-05	Bhmt/Mat1a/Cth/Gnmt/Cdo1/Pah/Bhmt2/Abat/Ddah1/Rida/Afmid/Amdhd1/Aldh6a1/Hal/Slc16a2/Agxt/Got1/Ivd/Csad/Pm20d1/Mccc2/Mmut/Iyd	23	GO BP	up	NP
GOBP_REGULATION_OF_COAGULATION	GOBP_REGULATION_OF_COAGULATION	GOBP_REGULATION_OF_COAGULATION	10/189	39/5089	9.78936e-07	0.000135746	0.000117816	Fgg/Kng2/Fgb/Apoe/Fga/Abat/Apoh/F11/Cd36/Prkg1	10	GO BP	up	NP
GOBP_SULFUR_COMPOUND_METABOLIC_PROCESS	GOBP_SULFUR_COMPOUND_METABOLIC_PROCESS	GOBP_SULFUR_COMPOUND_METABOLIC_PROCESS	19/189	176/5089	2.26064e-05	0.00235107	0.00204053	Bhmt/Mat1a/Cth/Gnmt/Cdo1/Sult1a1/Bhmt2/Gsta3/Ahcy/Papss2/Gstm1/Pdk1/Agxt/Gstt2/Csad/Mmut/Hmgcs1/Dcn/Mcee	19	GO BP	up	NP
GOBP_ONE_CARBON_METABOLIC_PROCESS	GOBP_ONE_CARBON_METABOLIC_PROCESS	GOBP_ONE_CARBON_METABOLIC_PROCESS	6/189	19/5089	4.39046e-05	0.00365286	0.00317037	Mat1a/Gnmt/Car3/Ahcy/Car8/Car5a	6	GO BP	up	NP
GOBP_CIRCULATORY_SYSTEM_PROCESS	GOBP_CIRCULATORY_SYSTEM_PROCESS	GOBP_CIRCULATORY_SYSTEM_PROCESS	22/189	238/5089	5.76936e-05	0.00400009	0.00347173	Fgg/Abcc3/Kng2/Fgb/Apoe/Slc16a7/Fga/Abat/Ddah1/Map2k6/Slc16a2/Cxcl12/Slc16a12/Agt/Cd36/Sucnr1/Adra1a/Smad7/Gpd1l/Pparg/Prkg1/Thra	22	GO BP	up	NP
GOBP_S_ADENOSYLMETHIONINE_METABOLIC_PROCESS	GOBP_S_ADENOSYLMETHIONINE_METABOLIC_PROCESS	GOBP_S_ADENOSYLMETHIONINE_METABOLIC_PROCESS	5/189	13/5089	6.76541e-05	0.00402059	0.00348953	Bhmt/Mat1a/Gnmt/Bhmt2/Ahcy	5	GO BP	up	NP
GOBP_ORGANIC_HYDROXY_COMPOUND_METABOLIC_PROCESS	GOBP_ORGANIC_HYDROXY_COMPOUND_METABOLIC_PROCESS	GOBP_ORGANIC_HYDROXY_COMPOUND_METABOLIC_PROCESS	23/189	272/5089	0.000153968	0.00800633	0.00694882	Apoa2/Sult1a1/Apoe/Akr1d1/Pah/Pon1/Cyp8b1/Abat/Insig1/Ces1d/Cyp27a1/Angptl3/Cyp3a11/Slc16a2/Got1/Cyp7a1/Osbpl3/Ddt/Pltp/Ebpl/Hmgcs1/Idh2/Iyd	23	GO BP	up	NP
GOBP_REGULATION_OF_LIPID_LOCALIZATION	GOBP_REGULATION_OF_LIPID_LOCALIZATION	GOBP_REGULATION_OF_LIPID_LOCALIZATION	12/189	95/5089	0.000177623	0.00821012	0.00712569	Apoa2/Apoe/Pon1/Cyp8b1/Irs2/Ces1d/Map2k6/Agt/Cd36/Eepd1/Pltp/Pparg	12	GO BP	up	NP
GOBP_REGULATION_OF_TISSUE_REMODELING	GOBP_REGULATION_OF_TISSUE_REMODELING	GOBP_REGULATION_OF_TISSUE_REMODELING	7/189	40/5089	0.000573855	0.0228431	0.0198259	Trf/Hamp/Agt/Ppargc1b/Pparg/Il18/Cst3	7	GO BP	up	NP
GOBP_REGULATION_OF_HORMONE_LEVELS	GOBP_REGULATION_OF_HORMONE_LEVELS	GOBP_REGULATION_OF_HORMONE_LEVELS	18/189	208/5089	0.000630752	0.0228431	0.0198259	Fgg/Ctsl/Fgb/Sult1a1/Akr1d1/Fga/Abat/Psmd9/Irs2/Papss2/Bche/Cyp3a11/Slc16a2/Agt/Tiparp/Pparg/Iyd/Rab11fip2	18	GO BP	up	NP
GOBP_CELLULAR_RESPONSE_TO_LIPOPROTEIN_PARTICLE_STIMULUS	GOBP_CELLULAR_RESPONSE_TO_LIPOPROTEIN_PARTICLE_STIMULUS	GOBP_CELLULAR_RESPONSE_TO_LIPOPROTEIN_PARTICLE_STIMULUS	5/189	20/5089	0.000658937	0.0228431	0.0198259	Apoe/Ces1d/Cd36/Cd81/Pparg	5	GO BP	up	NP
GOBP_LIPID_HOMEOSTASIS	GOBP_LIPID_HOMEOSTASIS	GOBP_LIPID_HOMEOSTASIS	11/189	96/5089	0.00077328	0.024113	0.020928	Apoa2/Apoe/Insig1/Irs2/Ces1d/Angptl3/Got1/Cyp7a1/Rtn4/Pparg/Il18	11	GO BP	up	NP
GOBP_XENOBIOTIC_METABOLIC_PROCESS	GOBP_XENOBIOTIC_METABOLIC_PROCESS	GOBP_XENOBIOTIC_METABOLIC_PROCESS	7/189	43/5089	0.000902699	0.024113	0.020928	Sult1a1/Gsta3/Fmo1/Cmbl/Cyp3a11/Ahr/Cyp2a5	7	GO BP	up	NP
GOBP_CELLULAR_MODIFIED_AMINO_ACID_METABOLIC_PROCESS	GOBP_CELLULAR_MODIFIED_AMINO_ACID_METABOLIC_PROCESS	GOBP_CELLULAR_MODIFIED_AMINO_ACID_METABOLIC_PROCESS	10/189	83/5089	0.000903022	0.024113	0.020928	Bhmt/Dmgdh/Gnmt/Bhmt2/Gsta3/Gstm1/Slc16a2/Gstt2/Gamt/Iyd	10	GO BP	up	NP
GOBP_LIPID_LOCALIZATION	GOBP_LIPID_LOCALIZATION	GOBP_LIPID_LOCALIZATION	19/189	233/5089	0.000927422	0.024113	0.020928	Apoa2/Abcc3/Apoe/Pon1/Cyp8b1/Stard5/Irs2/Apoh/Ces1d/Map2k6/Angptl3/Cyp7a1/Plscr2/Agt/Cd36/Eepd1/Osbpl3/Pltp/Pparg	19	GO BP	up	NP
GOBP_REGULATION_OF_SYSTEM_PROCESS	GOBP_REGULATION_OF_SYSTEM_PROCESS	GOBP_REGULATION_OF_SYSTEM_PROCESS	17/189	209/5089	0.00177565	0.0434513	0.037712	Apoa2/Fgg/Fgb/Apoe/Cyp8b1/Fga/Abat/Hamp/Agt/Nr4a1/Adra1a/Smad7/Gpd1l/Pparg/Prkg1/Thra/Reln	17	GO BP	up	NP
GOBP_NERVOUS_SYSTEM_PROCESS	GOBP_NERVOUS_SYSTEM_PROCESS	GOBP_NERVOUS_SYSTEM_PROCESS	21/189	293/5089	0.00258139	0.0596588	0.0517788	Retreg1/Rgs16/Apoe/Abat/Slc17a8/Btg2/Tulp2/Bche/Ank3/Pgrmc1/Serpinb6a/Cxcl12/Agt/Cd36/Nr4a1/Adra1a/Insyn2a/Gpr155/Thra/Dcdc2a/Reln	21	GO BP	up	NP
GOBP_RESPONSE_TO_XENOBIOTIC_STIMULUS	GOBP_RESPONSE_TO_XENOBIOTIC_STIMULUS	GOBP_RESPONSE_TO_XENOBIOTIC_STIMULUS	15/189	185/5089	0.00339224	0.0738904	0.0641306	Apoa2/Sult1a1/Gsta3/Abat/Fmo1/Map2k6/Cmbl/Bche/Cyp3a11/Ahr/Jun/Igfbp2/Adra1a/Cyp2a5/Npas2	15	GO BP	up	NP
GOBP_FOREBRAIN_DEVELOPMENT	GOBP_FOREBRAIN_DEVELOPMENT	GOBP_FOREBRAIN_DEVELOPMENT	13/189	150/5089	0.00355242	0.0738904	0.0641306	Dlc1/Nfib/Btg2/Ccdc141/Cxcl12/Dixdc1/Robo1/Nrp2/Kdm2b/Rtn4/Prkg1/Nde1/Reln	13	GO BP	up	NP
GOBP_REGULATION_OF_MEMBRANE_DEPOLARIZATION	GOBP_REGULATION_OF_MEMBRANE_DEPOLARIZATION	GOBP_REGULATION_OF_MEMBRANE_DEPOLARIZATION	4/189	19/5089	0.00460746	0.0902126	0.0782969	Ank3/Smad7/Gpd1l/Dcn	4	GO BP	up	NP
GOBP_NEUROTRANSMITTER_METABOLIC_PROCESS	GOBP_NEUROTRANSMITTER_METABOLIC_PROCESS	GOBP_NEUROTRANSMITTER_METABOLIC_PROCESS	3/189	5089-10-01	0.00498772	0.0902126	0.0782969	Pah/Abat/Bche	3	GO BP	up	NP
GOBP_TOXIN_METABOLIC_PROCESS	GOBP_TOXIN_METABOLIC_PROCESS	GOBP_TOXIN_METABOLIC_PROCESS	3/189	5089-10-01	0.00498772	0.0902126	0.0782969	Fmo1/Cyp3a11/Cyp2a5	3	GO BP	up	NP
GOBP_TELENCEPHALON_DEVELOPMENT	GOBP_TELENCEPHALON_DEVELOPMENT	GOBP_TELENCEPHALON_DEVELOPMENT	10/189	107/5089	0.00603952	0.104685	0.0908576	Nfib/Btg2/Ccdc141/Cxcl12/Dixdc1/Robo1/Kdm2b/Rtn4/Nde1/Reln	10	GO BP	up	NP
GOBP_REGULATION_OF_PLASMA_LIPOPROTEIN_PARTICLE_LEVELS	GOBP_REGULATION_OF_PLASMA_LIPOPROTEIN_PARTICLE_LEVELS	GOBP_REGULATION_OF_PLASMA_LIPOPROTEIN_PARTICLE_LEVELS	6/189	46/5089	0.00658368	0.106757	0.0926562	Apoa2/Apoe/Pon1/Agt/Cd36/Pltp	6	GO BP	up	NP
GOBP_CELLULAR_METABOLIC_COMPOUND_SALVAGE	GOBP_CELLULAR_METABOLIC_COMPOUND_SALVAGE	GOBP_CELLULAR_METABOLIC_COMPOUND_SALVAGE	3/189	5089-11-01	0.00667233	0.106757	0.0926562	Bhmt/Upp2/Bhmt2	3	GO BP	up	NP
GOBP_HORMONE_METABOLIC_PROCESS	GOBP_HORMONE_METABOLIC_PROCESS	GOBP_HORMONE_METABOLIC_PROCESS	9/189	94/5089	0.00774298	0.11511	0.0999058	Ctsl/Sult1a1/Akr1d1/Papss2/Bche/Cyp3a11/Slc16a2/Tiparp/Iyd	9	GO BP	up	NP
GOBP_MUSCLE_STRUCTURE_DEVELOPMENT	GOBP_MUSCLE_STRUCTURE_DEVELOPMENT	GOBP_MUSCLE_STRUCTURE_DEVELOPMENT	18/189	262/5089	0.00802958	0.11511	0.0999058	Cth/H3f3b/Hamp/Btg2/Zfp36l1/Pdcd4/Syne1/Agt/Gdf15/Nr4a1/Prickle1/Btg1/Adra1a/Smad7/Cd81/Il18/Cited2/Adam12	18	GO BP	up	NP
GOBP_DIGESTION	GOBP_DIGESTION	GOBP_DIGESTION	6/189	48/5089	0.00811346	0.11511	0.0999058	Apoa2/Akr1d1/Cyp8b1/Hamp/Serpina3n/Cd36	6	GO BP	up	NP
GOBP_ORGANIC_ACID_TRANSMEMBRANE_TRANSPORT	GOBP_ORGANIC_ACID_TRANSMEMBRANE_TRANSPORT	GOBP_ORGANIC_ACID_TRANSMEMBRANE_TRANSPORT	7/189	63/5089	0.00830121	0.11511	0.0999058	Slc16a7/Slc17a8/Mpc1/Irs2/Slc16a2/Agt/Cd36	7	GO BP	up	NP
GOBP_CEREBRAL_CORTEX_DEVELOPMENT	GOBP_CEREBRAL_CORTEX_DEVELOPMENT	GOBP_CEREBRAL_CORTEX_DEVELOPMENT	6/189	50/5089	0.00988373	0.13119	0.113861	Ccdc141/Dixdc1/Robo1/Rtn4/Nde1/Reln	6	GO BP	up	NP
GOBP_MUSCLE_CELL_PROLIFERATION	GOBP_MUSCLE_CELL_PROLIFERATION	GOBP_MUSCLE_CELL_PROLIFERATION	9/189	98/5089	0.0100915	0.13119	0.113861	Apoe/Pdcd4/Hpgd/Agt/Jun/Pparg/Il18/Prkg1/Cited2	9	GO BP	up	NP
GOBP_ALCOHOL_METABOLIC_PROCESS	GOBP_ALCOHOL_METABOLIC_PROCESS	GOBP_ALCOHOL_METABOLIC_PROCESS	14/189	190/5089	0.010529	0.13273	0.115198	Apoa2/Sult1a1/Apoe/Akr1d1/Pon1/Insig1/Ces1d/Cyp27a1/Angptl3/Cyp3a11/Got1/Cyp7a1/Hmgcs1/Idh2	14	GO BP	up	NP
GOBP_SECONDARY_METABOLIC_PROCESS	GOBP_SECONDARY_METABOLIC_PROCESS	GOBP_SECONDARY_METABOLIC_PROCESS	4/189	24/5089	0.0109293	0.133723	0.11606	Fmo1/Cyp3a11/Ddt/Cyp2a5	4	GO BP	up	NP
GOBP_REGULATION_OF_CHEMOTAXIS	GOBP_REGULATION_OF_CHEMOTAXIS	GOBP_REGULATION_OF_CHEMOTAXIS	8/189	84/5089	0.0121726	0.14468	0.12557	Rarres2/Cxcl12/Robo1/St6gal1/Ddt/Sucnr1/Mospd2/Tmsb4x	8	GO BP	up	NP
GOBP_LIPID_DIGESTION	GOBP_LIPID_DIGESTION	GOBP_LIPID_DIGESTION	3/189	14/5089	0.0135596	0.15551	0.134969	Apoa2/Cyp8b1/Cd36	3	GO BP	up	NP
GOBP_CYTOKINE_PRODUCTION_INVOLVED_IN_IMMUNE_RESPONSE	GOBP_CYTOKINE_PRODUCTION_INVOLVED_IN_IMMUNE_RESPONSE	GOBP_CYTOKINE_PRODUCTION_INVOLVED_IN_IMMUNE_RESPONSE	5/189	39/5089	0.0138314	0.15551	0.134969	Apoa2/Cd36/Smad7/Cd81/Il18	5	GO BP	up	NP
GOBP_CELLULAR_KETONE_METABOLIC_PROCESS	GOBP_CELLULAR_KETONE_METABOLIC_PROCESS	GOBP_CELLULAR_KETONE_METABOLIC_PROCESS	10/189	122/5089	0.0146795	0.158019	0.137147	Bhmt/Insig1/Irs2/Ces1d/Afmid/Pdk1/Cyp7a1/Nqo2/Coq10b/Pparg	10	GO BP	up	NP
GOBP_REGULATION_OF_BODY_FLUID_LEVELS	GOBP_REGULATION_OF_BODY_FLUID_LEVELS	GOBP_REGULATION_OF_BODY_FLUID_LEVELS	13/189	179/5089	0.0151027	0.158019	0.137147	Fgg/Kng2/Fgb/Cdo1/Apoe/Fga/Abat/Papss2/Apoh/F11/F13b/Cd36/Prkg1	13	GO BP	up	NP
GOBP_CELLULAR_OXIDANT_DETOXIFICATION	GOBP_CELLULAR_OXIDANT_DETOXIFICATION	GOBP_CELLULAR_OXIDANT_DETOXIFICATION	5/189	40/5089	0.015344	0.158019	0.137147	Apoe/Mgst1/Trp53inp1/Cd36/Prdx5	5	GO BP	up	NP
GOBP_TUBE_FORMATION	GOBP_TUBE_FORMATION	GOBP_TUBE_FORMATION	7/189	71/5089	0.0155739	0.158019	0.137147	Dlc1/Nfib/Kdm2b/Prickle1/Atoh8/Cited2/Bcl2l11	7	GO BP	up	NP
GOBP_RESPONSE_TO_TOXIC_SUBSTANCE	GOBP_RESPONSE_TO_TOXIC_SUBSTANCE	GOBP_RESPONSE_TO_TOXIC_SUBSTANCE	9/189	106/5089	0.0163524	0.161967	0.140573	Apoe/Mgst1/Pon1/Trp53inp1/Ces1d/Inmt/Ahr/Cd36/Prdx5	9	GO BP	up	NP
GOBP_DIGESTIVE_SYSTEM_PROCESS	GOBP_DIGESTIVE_SYSTEM_PROCESS	GOBP_DIGESTIVE_SYSTEM_PROCESS	5/189	41/5089	0.0169635	0.164112	0.142435	Apoa2/Cyp8b1/Hamp/Serpina3n/Cd36	5	GO BP	up	NP
GOBP_PALLIUM_DEVELOPMENT	GOBP_PALLIUM_DEVELOPMENT	GOBP_PALLIUM_DEVELOPMENT	7/189	74/5089	0.0192102	0.181623	0.157634	Btg2/Ccdc141/Dixdc1/Robo1/Rtn4/Nde1/Reln	7	GO BP	up	NP
GOBP_EPITHELIAL_CELL_PROLIFERATION	GOBP_EPITHELIAL_CELL_PROLIFERATION	GOBP_EPITHELIAL_CELL_PROLIFERATION	13/189	186/5089	0.0201823	0.186574	0.161931	Nfib/Apoe/Zfp36l1/Rida/Apoh/Cxcl12/Robo1/Nrp2/Jun/Nr4a1/Atoh8/Rtn4/Pparg	13	GO BP	up	NP
GOBP_TISSUE_MIGRATION	GOBP_TISSUE_MIGRATION	GOBP_TISSUE_MIGRATION	12/189	168/5089	0.0216227	0.194723	0.169003	Apoe/Apoh/Robo1/Agt/Nrp2/Jun/Nr4a1/Atoh8/Rtn4/Pparg/Dcn/Tmsb4x	12	GO BP	up	NP
GOBP_ADAPTIVE_THERMOGENESIS	GOBP_ADAPTIVE_THERMOGENESIS	GOBP_ADAPTIVE_THERMOGENESIS	8/189	94/5089	0.0227374	0.194723	0.169003	Scd1/Gadd45g/Map2k6/Cd36/Pm20d1/Ppargc1b/Il18/Thra	8	GO BP	up	NP
GOBP_HINDBRAIN_DEVELOPMENT	GOBP_HINDBRAIN_DEVELOPMENT	GOBP_HINDBRAIN_DEVELOPMENT	6/189	60/5089	0.0229749	0.194723	0.169003	Dlc1/Nfib/Abat/Dixdc1/Plxna2/Kdm2b	6	GO BP	up	NP
GOBP_REGULATION_OF_BEHAVIOR	GOBP_REGULATION_OF_BEHAVIOR	GOBP_REGULATION_OF_BEHAVIOR	3/189	17/5089	0.023346	0.194723	0.169003	Apoe/Npas2/Reln	3	GO BP	up	NP
GOBP_TISSUE_REMODELING	GOBP_TISSUE_REMODELING	GOBP_TISSUE_REMODELING	7/189	77/5089	0.0234042	0.194723	0.169003	Trf/Hamp/Agt/Ppargc1b/Pparg/Il18/Cst3	7	GO BP	up	NP
GOBP_REGULATION_OF_HORMONE_SECRETION	GOBP_REGULATION_OF_HORMONE_SECRETION	GOBP_REGULATION_OF_HORMONE_SECRETION	8/189	95/5089	0.0240662	0.196305	0.170376	Fgg/Fgb/Fga/Abat/Psmd9/Irs2/Agt/Pparg	8	GO BP	up	NP
GOBP_REGULATION_OF_EPITHELIAL_CELL_MIGRATION	GOBP_REGULATION_OF_EPITHELIAL_CELL_MIGRATION	GOBP_REGULATION_OF_EPITHELIAL_CELL_MIGRATION	10/189	133/5089	0.0253415	0.202732	0.175954	Apoe/Apoh/Agt/Nrp2/Jun/Atoh8/Rtn4/Pparg/Dcn/Tmsb4x	10	GO BP	up	NP
GOBP_ANDROGEN_METABOLIC_PROCESS	GOBP_ANDROGEN_METABOLIC_PROCESS	GOBP_ANDROGEN_METABOLIC_PROCESS	3/189	18/5089	0.0272662	0.214014	0.185746	Akr1d1/Cyp3a11/Tiparp	3	GO BP	up	NP
GOBP_PLATELET_ACTIVATION	GOBP_PLATELET_ACTIVATION	GOBP_PLATELET_ACTIVATION	6/189	63/5089	0.028476	0.219371	0.190395	Fgg/Fgb/Apoe/Fga/Abat/Prkg1	6	GO BP	up	NP
GOBP_MUSCLE_SYSTEM_PROCESS	GOBP_MUSCLE_SYSTEM_PROCESS	GOBP_MUSCLE_SYSTEM_PROCESS	11/189	156/5089	0.0296628	0.222324	0.192958	Abat/Hamp/Map2k6/Agt/Nr4a1/Gamt/Adra1a/Smad7/Gpd1l/Pparg/Prkg1	11	GO BP	up	NP
GOBP_TEMPERATURE_HOMEOSTASIS	GOBP_TEMPERATURE_HOMEOSTASIS	GOBP_TEMPERATURE_HOMEOSTASIS	8/189	99/5089	0.0299282	0.222324	0.192958	Scd1/Gadd45g/Abat/Map2k6/Cd36/Ppargc1b/Il18/Thra	8	GO BP	up	NP
GOBP_RESPONSE_TO_MECHANICAL_STIMULUS	GOBP_RESPONSE_TO_MECHANICAL_STIMULUS	GOBP_RESPONSE_TO_MECHANICAL_STIMULUS	7/189	82/5089	0.0317294	0.231569	0.200982	Btg2/Cxcl12/Agt/Jun/Igfbp2/Jund/Cited2	7	GO BP	up	NP
GOBP_REGULATION_OF_BLOOD_PRESSURE	GOBP_REGULATION_OF_BLOOD_PRESSURE	GOBP_REGULATION_OF_BLOOD_PRESSURE	6/189	65/5089	0.0325891	0.233743	0.202869	Abat/Ddah1/Agt/Sucnr1/Adra1a/Pparg	6	GO BP	up	NP
GOBP_TAXIS	GOBP_TAXIS	GOBP_TAXIS	14/189	221/5089	0.0343617	0.242145	0.210161	Nfib/Rarres2/Pgrmc1/Cxcl12/Robo1/St6gal1/Nrp2/Ddt/Plxna2/Nr4a1/Sucnr1/Mospd2/Tmsb4x/Reln	14	GO BP	up	NP
GOBP_MAINTENANCE_OF_PROTEIN_LOCATION_IN_CELL	GOBP_MAINTENANCE_OF_PROTEIN_LOCATION_IN_CELL	GOBP_MAINTENANCE_OF_PROTEIN_LOCATION_IN_CELL	4/189	34/5089	0.0358139	0.242145	0.210161	Insig1/Ank3/Syne1/Tmsb4x	4	GO BP	up	NP
GOBP_ESTROGEN_METABOLIC_PROCESS	GOBP_ESTROGEN_METABOLIC_PROCESS	GOBP_ESTROGEN_METABOLIC_PROCESS	3/189	20/5089	0.0360889	0.242145	0.210161	Sult1a1/Cyp3a11/Tiparp	3	GO BP	up	NP
GOBP_SYNCYTIUM_FORMATION	GOBP_SYNCYTIUM_FORMATION	GOBP_SYNCYTIUM_FORMATION	3/189	20/5089	0.0360889	0.242145	0.210161	Gdf15/Cd81/Adam12	3	GO BP	up	NP
GOBP_RESPONSE_TO_BACTERIUM	GOBP_RESPONSE_TO_BACTERIUM	GOBP_RESPONSE_TO_BACTERIUM	15/189	245/5089	0.0377125	0.249022	0.21613	Nfib/Fgb/Trf/Car3/Fga/Fkbp5/Hamp/Fmo1/Rarres2/Pdcd4/Hpgd/Cd36/Nr4a1/Jund/Il18	15	GO BP	up	NP
GOBP_REGULATION_OF_TRANSPORTER_ACTIVITY	GOBP_REGULATION_OF_TRANSPORTER_ACTIVITY	GOBP_REGULATION_OF_TRANSPORTER_ACTIVITY	8/189	106/5089	0.0424265	0.272326	0.236356	Apoa2/Pon1/Ank3/Pm20d1/Gpd1l/Pparg/Tmsb4x/Reln	8	GO BP	up	NP
GOBP_RESPONSE_TO_INORGANIC_SUBSTANCE	GOBP_RESPONSE_TO_INORGANIC_SUBSTANCE	GOBP_RESPONSE_TO_INORGANIC_SUBSTANCE	15/189	249/5089	0.042551	0.272326	0.236356	Fgg/Fgb/Trf/Pon1/Fga/Abat/Hamp/Ank3/Blm/Cd36/Jun/Junb/Sucnr1/Igfbp2/Jund	15	GO BP	up	NP
GOBP_REGENERATION	GOBP_REGENERATION	GOBP_REGENERATION	7/189	88/5089	0.0440914	0.274922	0.238609	Apoa2/Igfbp1/Hamp/Pfkfb1/Cxcl12/Jun/Cd81	7	GO BP	up	NP
GOBP_MULTI_MULTICELLULAR_ORGANISM_PROCESS	GOBP_MULTI_MULTICELLULAR_ORGANISM_PROCESS	GOBP_MULTI_MULTICELLULAR_ORGANISM_PROCESS	6/189	70/5089	0.0445039	0.274922	0.238609	H3f3b/Hpgd/Agt/Junb/Igfbp2/Cited2	6	GO BP	up	NP
GOBP_BLASTOCYST_FORMATION	GOBP_BLASTOCYST_FORMATION	GOBP_BLASTOCYST_FORMATION	3/189	22/5089	0.0461974	0.274922	0.238609	Junb/Rtn4/Cited2	3	GO BP	up	NP
GOBP_MULTICELLULAR_ORGANISMAL_RESPONSE_TO_STRESS	GOBP_MULTICELLULAR_ORGANISMAL_RESPONSE_TO_STRESS	GOBP_MULTICELLULAR_ORGANISMAL_RESPONSE_TO_STRESS	3/189	22/5089	0.0461974	0.274922	0.238609	Apoe/Npas2/Reln	3	GO BP	up	NP
GOBP_REGULATION_OF_SMALL_MOLECULE_METABOLIC_PROCESS	GOBP_REGULATION_OF_SMALL_MOLECULE_METABOLIC_PROCESS	GOBP_REGULATION_OF_SMALL_MOLECULE_METABOLIC_PROCESS	12/189	190/5089	0.0491041	0.274922	0.238609	Bhmt/Gnmt/Apoe/Ppp1r3g/Insig1/Irs2/Pfkfb1/Ces1d/Pdk1/Cyp7a1/Pparg/Tmsb4x	12	GO BP	up	NP
GOBP_RESPONSE_TO_WOUNDING	GOBP_RESPONSE_TO_WOUNDING	GOBP_RESPONSE_TO_WOUNDING	15/189	254/5089	0.0492047	0.274922	0.238609	Fgg/Kng2/Fgb/Apoe/Fga/Abat/Zfp36l1/Papss2/Apoh/F11/F13b/Cd36/Jun/Pparg/Prkg1	15	GO BP	up	NP
GOBP_REGULATION_OF_MEMBRANE_POTENTIAL	GOBP_REGULATION_OF_MEMBRANE_POTENTIAL	GOBP_REGULATION_OF_MEMBRANE_POTENTIAL	9/189	129/5089	0.0495583	0.274922	0.238609	Abat/Ank3/Cd36/Adra1a/Smad7/Gpd1l/Insyn2a/Dcn/Reln	9	GO BP	up	NP
GOBP_REGULATION_OF_PRODUCTION_OF_MOLECULAR_MEDIATOR_OF_IMMUNE_RESPONSE	GOBP_REGULATION_OF_PRODUCTION_OF_MOLECULAR_MEDIATOR_OF_IMMUNE_RESPONSE	GOBP_REGULATION_OF_PRODUCTION_OF_MOLECULAR_MEDIATOR_OF_IMMUNE_RESPONSE	6/189	72/5089	0.0499424	0.274922	0.238609	Apoa2/Cd36/Smad7/Cd81/Il18/Msh2	6	GO BP	up	NP
GOBP_BILE_ACID_SIGNALING_PATHWAY	GOBP_BILE_ACID_SIGNALING_PATHWAY	GOBP_BILE_ACID_SIGNALING_PATHWAY	2/189	5089-10-01	0.0507425	0.274922	0.238609	Cyp8b1/Cyp7a1	2	GO BP	up	NP
GOBP_COLLAGEN_CATABOLIC_PROCESS	GOBP_COLLAGEN_CATABOLIC_PROCESS	GOBP_COLLAGEN_CATABOLIC_PROCESS	2/189	5089-10-01	0.0507425	0.274922	0.238609	Ctsl/Cst3	2	GO BP	up	NP
GOBP_TRANSMISSION_OF_NERVE_IMPULSE	GOBP_TRANSMISSION_OF_NERVE_IMPULSE	GOBP_TRANSMISSION_OF_NERVE_IMPULSE	2/189	5089-10-01	0.0507425	0.274922	0.238609	Ank3/Agt	2	GO BP	up	NP
GOBP_CARDIAC_SEPTUM_MORPHOGENESIS	GOBP_CARDIAC_SEPTUM_MORPHOGENESIS	GOBP_CARDIAC_SEPTUM_MORPHOGENESIS	4/189	38/5089	0.0508869	0.274922	0.238609	Robo1/Nrp2/Smad7/Cited2	4	GO BP	up	NP
GOBP_DEVELOPMENTAL_CELL_GROWTH	GOBP_DEVELOPMENTAL_CELL_GROWTH	GOBP_DEVELOPMENTAL_CELL_GROWTH	8/189	111/5089	0.0532161	0.283819	0.246331	Apoe/Hamp/Cxcl12/Agt/Nrp2/Adra1a/Smad7/Rtn4	8	GO BP	up	NP
GOBP_LIPID_STORAGE	GOBP_LIPID_STORAGE	GOBP_LIPID_STORAGE	5/189	56/5089	0.0555731	0.292638	0.253985	Apoe/Ces1d/Angptl3/Cd36/Pparg	5	GO BP	up	NP
GOBP_MICROTUBULE_ORGANIZING_CENTER_LOCALIZATION	GOBP_MICROTUBULE_ORGANIZING_CENTER_LOCALIZATION	GOBP_MICROTUBULE_ORGANIZING_CENTER_LOCALIZATION	3/189	24/5089	0.0575482	0.294873	0.255924	Ccdc141/Plxna2/Nde1	3	GO BP	up	NP
GOBP_HUMORAL_IMMUNE_RESPONSE	GOBP_HUMORAL_IMMUNE_RESPONSE	GOBP_HUMORAL_IMMUNE_RESPONSE	6/189	75/5089	0.0588364	0.294873	0.255924	Fgb/Trf/Fga/Rarres2/St6gal1/Cd81	6	GO BP	up	NP
GOBP_DETOXIFICATION	GOBP_DETOXIFICATION	GOBP_DETOXIFICATION	5/189	57/5089	0.0591629	0.294873	0.255924	Apoe/Mgst1/Trp53inp1/Cd36/Prdx5	5	GO BP	up	NP
GOBP_NEURAL_PRECURSOR_CELL_PROLIFERATION	GOBP_NEURAL_PRECURSOR_CELL_PROLIFERATION	GOBP_NEURAL_PRECURSOR_CELL_PROLIFERATION	5/189	57/5089	0.0591629	0.294873	0.255924	Btg2/Slc16a2/Dixdc1/Kdm2b/Nde1	5	GO BP	up	NP
GOBP_OUTFLOW_TRACT_MORPHOGENESIS	GOBP_OUTFLOW_TRACT_MORPHOGENESIS	GOBP_OUTFLOW_TRACT_MORPHOGENESIS	4/189	40/5089	0.0595416	0.294873	0.255924	Robo1/Nrp2/Jun/Cited2	4	GO BP	up	NP
GOBP_MATING	GOBP_MATING	GOBP_MATING	2/189	5089-11-01	0.0605358	0.296269	0.257137	Abat/Thra	2	GO BP	up	NP
GOBP_GLUTATHIONE_METABOLIC_PROCESS	GOBP_GLUTATHIONE_METABOLIC_PROCESS	GOBP_GLUTATHIONE_METABOLIC_PROCESS	3/189	25/5089	0.0636719	0.307994	0.267313	Gsta3/Gstm1/Gstt2	3	GO BP	up	NP
GOBP_REGULATION_OF_CELL_ACTIVATION	GOBP_REGULATION_OF_CELL_ACTIVATION	GOBP_REGULATION_OF_CELL_ACTIVATION	14/189	242/5089	0.0646517	0.309139	0.268307	Fgg/Apoe/Abat/Hamp/Zfp36l1/Irs2/Ahr/Igfbp2/Jund/Smad7/Cd81/Il18/Prkg1/Msh2	14	GO BP	up	NP
GOBP_AMMONIUM_ION_METABOLIC_PROCESS	GOBP_AMMONIUM_ION_METABOLIC_PROCESS	GOBP_AMMONIUM_ION_METABOLIC_PROCESS	2/189	5089-12-01	0.0709118	0.335219	0.290942	Dmgdh/Bche	2	GO BP	up	NP
GOBP_NUCLEOBASE_CONTAINING_SMALL_MOLECULE_METABOLIC_PROCESS	GOBP_NUCLEOBASE_CONTAINING_SMALL_MOLECULE_METABOLIC_PROCESS	GOBP_NUCLEOBASE_CONTAINING_SMALL_MOLECULE_METABOLIC_PROCESS	16/189	291/5089	0.072745	0.340021	0.29511	Upp2/Gnmt/Sult1a1/Dhtkd1/Papss2/Pfkfb1/Afmid/Aldh6a1/Pdk1/Mccc2/Paics/Nt5c3/Hmgcs1/Mcee/Nt5e/Tmsb4x	16	GO BP	up	NP
GOBP_MAINTENANCE_OF_LOCATION	GOBP_MAINTENANCE_OF_LOCATION	GOBP_MAINTENANCE_OF_LOCATION	10/189	161/5089	0.0753433	0.348254	0.302254	Apoe/Insig1/Ces1d/Angptl3/Ank3/Syne1/Cd36/Rasa3/Pparg/Tmsb4x	10	GO BP	up	NP
GOBP_REGULATION_OF_MUSCLE_ADAPTATION	GOBP_REGULATION_OF_MUSCLE_ADAPTATION	GOBP_REGULATION_OF_MUSCLE_ADAPTATION	4/189	44/5089	0.0790329	0.361293	0.313572	Hamp/Agt/Adra1a/Pparg	4	GO BP	up	NP
GOBP_FEAR_RESPONSE	GOBP_FEAR_RESPONSE	GOBP_FEAR_RESPONSE	2/189	13/5089	0.0818141	0.365964	0.317626	Apoe/Npas2	2	GO BP	up	NP
GOBP_OXIDATIVE_DEMETHYLATION	GOBP_OXIDATIVE_DEMETHYLATION	GOBP_OXIDATIVE_DEMETHYLATION	2/189	13/5089	0.0818141	0.365964	0.317626	Cyp3a25/Cyp3a11	2	GO BP	up	NP
GOBP_ENDOCRINE_PROCESS	GOBP_ENDOCRINE_PROCESS	GOBP_ENDOCRINE_PROCESS	3/189	28/5089	0.0837349	0.369351	0.320565	Agt/Sucnr1/Pparg	3	GO BP	up	NP
GOBP_HEART_GROWTH	GOBP_HEART_GROWTH	GOBP_HEART_GROWTH	4/189	45/5089	0.084347	0.369351	0.320565	Hamp/Agt/Adra1a/Cited2	4	GO BP	up	NP
GOBP_PLASMA_LIPOPROTEIN_PARTICLE_CLEARANCE	GOBP_PLASMA_LIPOPROTEIN_PARTICLE_CLEARANCE	GOBP_PLASMA_LIPOPROTEIN_PARTICLE_CLEARANCE	3/189	29/5089	0.0909554	0.391586	0.339863	Apoa2/Apoe/Cd36	3	GO BP	up	NP
GOBP_MATERNAL_PLACENTA_DEVELOPMENT	GOBP_MATERNAL_PLACENTA_DEVELOPMENT	GOBP_MATERNAL_PLACENTA_DEVELOPMENT	2/189	14/5089	0.0931899	0.391586	0.339863	Junb/Cited2	2	GO BP	up	NP
GOBP_MESENCHYMAL_CELL_PROLIFERATION	GOBP_MESENCHYMAL_CELL_PROLIFERATION	GOBP_MESENCHYMAL_CELL_PROLIFERATION	2/189	14/5089	0.0931899	0.391586	0.339863	Nfib/Irs2	2	GO BP	up	NP
GOBP_RESPONSE_TO_FUNGUS	GOBP_RESPONSE_TO_FUNGUS	GOBP_RESPONSE_TO_FUNGUS	2/189	14/5089	0.0931899	0.391586	0.339863	Hamp/Rarres2	2	GO BP	up	NP
GOBP_REGIONALIZATION	GOBP_REGIONALIZATION	GOBP_REGIONALIZATION	7/189	106/5089	0.0980187	0.407758	0.353899	Btg2/Robo1/Nrp2/Plxna2/Kdm2b/Cited2/Reln	7	GO BP	up	NP
GOBP_RESPONSE_TO_ELECTRICAL_STIMULUS	GOBP_RESPONSE_TO_ELECTRICAL_STIMULUS	GOBP_RESPONSE_TO_ELECTRICAL_STIMULUS	2/189	15/5089	0.104989	0.432431	0.375313	Btg2/Nr4a1	2	GO BP	up	NP
GOBP_PIGMENT_BIOSYNTHETIC_PROCESS	GOBP_PIGMENT_BIOSYNTHETIC_PROCESS	GOBP_PIGMENT_BIOSYNTHETIC_PROCESS	3/189	31/5089	0.106135	0.432866	0.375691	Pgrmc1/Paics/Ddt	3	GO BP	up	NP
GOBP_REGULATION_OF_DEVELOPMENTAL_GROWTH	GOBP_REGULATION_OF_DEVELOPMENTAL_GROWTH	GOBP_REGULATION_OF_DEVELOPMENTAL_GROWTH	9/189	151/5089	0.107748	0.435175	0.377695	Apoe/Hamp/Cxcl12/Gdf15/Gamt/Smad7/Rtn4/Cited2/Bcl2l11	9	GO BP	up	NP
GOBP_CELL_RECOGNITION	GOBP_CELL_RECOGNITION	GOBP_CELL_RECOGNITION	4/189	50/5089	0.113408	0.449314	0.389966	Robo1/Cd36/Rtn4/Cd81	4	GO BP	up	NP
GOBP_MAINTENANCE_OF_PROTEIN_LOCATION	GOBP_MAINTENANCE_OF_PROTEIN_LOCATION	GOBP_MAINTENANCE_OF_PROTEIN_LOCATION	4/189	50/5089	0.113408	0.449314	0.389966	Insig1/Ank3/Syne1/Tmsb4x	4	GO BP	up	NP
GOBP_REGULATION_OF_MORPHOGENESIS_OF_A_BRANCHING_STRUCTURE	GOBP_REGULATION_OF_MORPHOGENESIS_OF_A_BRANCHING_STRUCTURE	GOBP_REGULATION_OF_MORPHOGENESIS_OF_A_BRANCHING_STRUCTURE	2/189	16/5089	0.117166	0.455522	0.395355	Agt/Rtn4	2	GO BP	up	NP
GOBP_TYPE_2_IMMUNE_RESPONSE	GOBP_TYPE_2_IMMUNE_RESPONSE	GOBP_TYPE_2_IMMUNE_RESPONSE	2/189	16/5089	0.117166	0.455522	0.395355	Cd81/Il18	2	GO BP	up	NP
GOBP_COLLAGEN_METABOLIC_PROCESS	GOBP_COLLAGEN_METABOLIC_PROCESS	GOBP_COLLAGEN_METABOLIC_PROCESS	3/189	33/5089	0.12223	0.47081	0.408623	Ctsl/Cyp7a1/Cst3	3	GO BP	up	NP
GOBP_PRODUCTION_OF_MOLECULAR_MEDIATOR_OF_IMMUNE_RESPONSE	GOBP_PRODUCTION_OF_MOLECULAR_MEDIATOR_OF_IMMUNE_RESPONSE	GOBP_PRODUCTION_OF_MOLECULAR_MEDIATOR_OF_IMMUNE_RESPONSE	6/189	92/5089	0.125852	0.47256	0.410142	Apoa2/Cd36/Smad7/Cd81/Il18/Msh2	6	GO BP	up	NP
GOBP_BEHAVIOR	GOBP_BEHAVIOR	GOBP_BEHAVIOR	11/189	201/5089	0.126279	0.47256	0.410142	Apoe/Abat/Btg2/Bche/Pgrmc1/Cxcl12/Agt/Gdf15/Npas2/Thra/Reln	11	GO BP	up	NP
GOBP_RESPONSE_TO_OXYGEN_LEVELS	GOBP_RESPONSE_TO_OXYGEN_LEVELS	GOBP_RESPONSE_TO_OXYGEN_LEVELS	9/189	157/5089	0.128408	0.47256	0.410142	Abat/Ddah1/Zfp36l1/Pdk1/Cxcl12/Chchd2/Rwdd3/Pparg/Cited2	9	GO BP	up	NP
GOBP_LIPID_EXPORT_FROM_CELL	GOBP_LIPID_EXPORT_FROM_CELL	GOBP_LIPID_EXPORT_FROM_CELL	2/189	17/5089	0.129675	0.47256	0.410142	Map2k6/Agt	2	GO BP	up	NP
GOBP_NEURON_RECOGNITION	GOBP_NEURON_RECOGNITION	GOBP_NEURON_RECOGNITION	2/189	17/5089	0.129675	0.47256	0.410142	Robo1/Rtn4	2	GO BP	up	NP
GOBP_REGULATION_OF_COLLAGEN_METABOLIC_PROCESS	GOBP_REGULATION_OF_COLLAGEN_METABOLIC_PROCESS	GOBP_REGULATION_OF_COLLAGEN_METABOLIC_PROCESS	2/189	17/5089	0.129675	0.47256	0.410142	Cyp7a1/Cst3	2	GO BP	up	NP
GOBP_MAINTENANCE_OF_LOCATION_IN_CELL	GOBP_MAINTENANCE_OF_LOCATION_IN_CELL	GOBP_MAINTENANCE_OF_LOCATION_IN_CELL	6/189	93/5089	0.130636	0.47256	0.410142	Apoe/Insig1/Ank3/Syne1/Rasa3/Tmsb4x	6	GO BP	up	NP
GOBP_REGULATION_OF_HEART_RATE	GOBP_REGULATION_OF_HEART_RATE	GOBP_REGULATION_OF_HEART_RATE	3/189	35/5089	0.139151	0.487358	0.422985	Agt/Adra1a/Gpd1l	3	GO BP	up	NP
GOBP_REGULATION_OF_LIPID_STORAGE	GOBP_REGULATION_OF_LIPID_STORAGE	GOBP_REGULATION_OF_LIPID_STORAGE	3/189	35/5089	0.139151	0.487358	0.422985	Ces1d/Cd36/Pparg	3	GO BP	up	NP
GOBP_REGULATION_OF_NEUROTRANSMITTER_LEVELS	GOBP_REGULATION_OF_NEUROTRANSMITTER_LEVELS	GOBP_REGULATION_OF_NEUROTRANSMITTER_LEVELS	5/189	74/5089	0.139266	0.487358	0.422985	Pah/Abat/Bche/Nr4a1/Adra1a	5	GO BP	up	NP
GOBP_MUSCLE_ADAPTATION	GOBP_MUSCLE_ADAPTATION	GOBP_MUSCLE_ADAPTATION	4/189	54/5089	0.139412	0.487358	0.422985	Hamp/Agt/Adra1a/Pparg	4	GO BP	up	NP
GOBP_BLASTOCYST_DEVELOPMENT	GOBP_BLASTOCYST_DEVELOPMENT	GOBP_BLASTOCYST_DEVELOPMENT	4/189	55/5089	0.146259	0.507033	0.440061	Junb/Rad51b/Rtn4/Cited2	4	GO BP	up	NP
GOBP_REACTIVE_NITROGEN_SPECIES_METABOLIC_PROCESS	GOBP_REACTIVE_NITROGEN_SPECIES_METABOLIC_PROCESS	GOBP_REACTIVE_NITROGEN_SPECIES_METABOLIC_PROCESS	3/189	36/5089	0.147894	0.508462	0.441302	Ddah1/Agt/Cd36	3	GO BP	up	NP
GOBP_CARDIAC_CHAMBER_MORPHOGENESIS	GOBP_CARDIAC_CHAMBER_MORPHOGENESIS	GOBP_CARDIAC_CHAMBER_MORPHOGENESIS	4/189	56/5089	0.153235	0.518259	0.449805	Robo1/Nrp2/Smad7/Cited2	4	GO BP	up	NP
GOBP_IMPORT_ACROSS_PLASMA_MEMBRANE	GOBP_IMPORT_ACROSS_PLASMA_MEMBRANE	GOBP_IMPORT_ACROSS_PLASMA_MEMBRANE	4/189	56/5089	0.153235	0.518259	0.449805	Irs2/Slc16a2/Agt/Cd36	4	GO BP	up	NP
GOBP_MYELOID_LEUKOCYTE_MIGRATION	GOBP_MYELOID_LEUKOCYTE_MIGRATION	GOBP_MYELOID_LEUKOCYTE_MIGRATION	5/189	77/5089	0.156802	0.526044	0.456561	Rarres2/Cxcl12/Ddt/Mospd2/Cd81	5	GO BP	up	NP
GOBP_REGULATION_OF_LEUKOCYTE_MIGRATION	GOBP_REGULATION_OF_LEUKOCYTE_MIGRATION	GOBP_REGULATION_OF_LEUKOCYTE_MIGRATION	5/189	79/5089	0.168974	0.557882	0.484194	Rarres2/Cxcl12/Ddt/Mospd2/Cd81	5	GO BP	up	NP
GOBP_REGULATION_OF_SYNAPSE_STRUCTURE_OR_ACTIVITY	GOBP_REGULATION_OF_SYNAPSE_STRUCTURE_OR_ACTIVITY	GOBP_REGULATION_OF_SYNAPSE_STRUCTURE_OR_ACTIVITY	5/189	79/5089	0.168974	0.557882	0.484194	Apoe/Slc17a8/Pgrmc1/Nrp2/Reln	5	GO BP	up	NP
GOBP_RESPONSE_TO_OSMOTIC_STRESS	GOBP_RESPONSE_TO_OSMOTIC_STRESS	GOBP_RESPONSE_TO_OSMOTIC_STRESS	3/189	39/5089	0.175121	0.568508	0.493417	Zfp36l1/Fmo1/Serpinb6a	3	GO BP	up	NP
GOBP_CELL_GROWTH	GOBP_CELL_GROWTH	GOBP_CELL_GROWTH	12/189	239/5089	0.176351	0.568508	0.493417	Apoe/Igfbp1/H3f3b/Hamp/Cxcl12/Agt/Nrp2/Kdm2b/Btg1/Adra1a/Smad7/Rtn4	12	GO BP	up	NP
GOBP_MULTICELLULAR_ORGANISMAL_HOMEOSTASIS	GOBP_MULTICELLULAR_ORGANISMAL_HOMEOSTASIS	GOBP_MULTICELLULAR_ORGANISMAL_HOMEOSTASIS	12/189	240/5089	0.179919	0.568508	0.493417	Trf/Scd1/Gadd45g/Abat/Hamp/Map2k6/Serpina3n/Cd36/Pm20d1/Ppargc1b/Il18/Thra	12	GO BP	up	NP
GOBP_EXCRETION	GOBP_EXCRETION	GOBP_EXCRETION	2/189	21/5089	0.182256	0.568508	0.493417	Agt/Adra1a	2	GO BP	up	NP
GOBP_FEEDING_BEHAVIOR	GOBP_FEEDING_BEHAVIOR	GOBP_FEEDING_BEHAVIOR	2/189	21/5089	0.182256	0.568508	0.493417	Agt/Gdf15	2	GO BP	up	NP
GOBP_RESPONSE_TO_FLUID_SHEAR_STRESS	GOBP_RESPONSE_TO_FLUID_SHEAR_STRESS	GOBP_RESPONSE_TO_FLUID_SHEAR_STRESS	2/189	21/5089	0.182256	0.568508	0.493417	Smad7/Cited2	2	GO BP	up	NP
GOBP_CARDIAC_SEPTUM_DEVELOPMENT	GOBP_CARDIAC_SEPTUM_DEVELOPMENT	GOBP_CARDIAC_SEPTUM_DEVELOPMENT	4/189	60/5089	0.182328	0.568508	0.493417	Robo1/Nrp2/Smad7/Cited2	4	GO BP	up	NP
GOBP_BONE_REMODELING	GOBP_BONE_REMODELING	GOBP_BONE_REMODELING	3/189	40/5089	0.184492	0.568508	0.493417	Trf/Hamp/Ppargc1b	3	GO BP	up	NP
GOBP_PIGMENT_METABOLIC_PROCESS	GOBP_PIGMENT_METABOLIC_PROCESS	GOBP_PIGMENT_METABOLIC_PROCESS	3/189	40/5089	0.184492	0.568508	0.493417	Pgrmc1/Paics/Ddt	3	GO BP	up	NP
GOBP_ION_HOMEOSTASIS	GOBP_ION_HOMEOSTASIS	GOBP_ION_HOMEOSTASIS	14/189	290/5089	0.188125	0.573792	0.498003	Kng2/Apoe/Trf/Hamp/Ank3/Cxcl12/Agt/Cd36/Tpt1/Adra1a/Smad7/Rasa3/Gpd1l/Dcn	14	GO BP	up	NP
GOBP_LEUKOCYTE_PROLIFERATION	GOBP_LEUKOCYTE_PROLIFERATION	GOBP_LEUKOCYTE_PROLIFERATION	7/189	127/5089	0.191984	0.573792	0.498003	Irs2/Ahr/Ccnd3/St6gal1/Igfbp2/Cd81/Il18	7	GO BP	up	NP
GOBP_ADAPTIVE_IMMUNE_RESPONSE	GOBP_ADAPTIVE_IMMUNE_RESPONSE	GOBP_ADAPTIVE_IMMUNE_RESPONSE	9/189	173/5089	0.192772	0.573792	0.498003	Ctsl/Fgb/Fga/Rnf125/Ahr/Smad7/Cd81/Il18/Msh2	9	GO BP	up	NP
GOBP_ORGAN_GROWTH	GOBP_ORGAN_GROWTH	GOBP_ORGAN_GROWTH	5/189	83/5089	0.194372	0.573792	0.498003	Hamp/Agt/Adra1a/Cited2/Bcl2l11	5	GO BP	up	NP
GOBP_AMYLOID_BETA_CLEARANCE	GOBP_AMYLOID_BETA_CLEARANCE	GOBP_AMYLOID_BETA_CLEARANCE	2/189	22/5089	0.195862	0.573792	0.498003	Apoe/Cd36	2	GO BP	up	NP
GOBP_LABYRINTHINE_LAYER_DEVELOPMENT	GOBP_LABYRINTHINE_LAYER_DEVELOPMENT	GOBP_LABYRINTHINE_LAYER_DEVELOPMENT	2/189	22/5089	0.195862	0.573792	0.498003	Zfp36l1/Junb	2	GO BP	up	NP
GOBP_REGULATION_OF_VASCULAR_PERMEABILITY	GOBP_REGULATION_OF_VASCULAR_PERMEABILITY	GOBP_REGULATION_OF_VASCULAR_PERMEABILITY	2/189	22/5089	0.195862	0.573792	0.498003	Apoe/Ddah1	2	GO BP	up	NP
GOBP_CARBOHYDRATE_METABOLIC_PROCESS	GOBP_CARBOHYDRATE_METABOLIC_PROCESS	GOBP_CARBOHYDRATE_METABOLIC_PROCESS	14/189	294/5089	0.201747	0.586901	0.50938	Gnmt/Pcx/Dhtkd1/Ppp1r3g/Irs2/Pfkfb1/Dhdh/Angptl3/Klb/Pdk1/Got1/Neu2/Gpd1l/Idh2	14	GO BP	up	NP
GOBP_BLOOD_VESSEL_REMODELING	GOBP_BLOOD_VESSEL_REMODELING	GOBP_BLOOD_VESSEL_REMODELING	2/189	23/5089	0.209589	0.593124	0.514781	Agt/Cst3	2	GO BP	up	NP
GOBP_MATERNAL_PROCESS_INVOLVED_IN_FEMALE_PREGNANCY	GOBP_MATERNAL_PROCESS_INVOLVED_IN_FEMALE_PREGNANCY	GOBP_MATERNAL_PROCESS_INVOLVED_IN_FEMALE_PREGNANCY	2/189	23/5089	0.209589	0.593124	0.514781	Junb/Cited2	2	GO BP	up	NP
GOBP_REGULATION_OF_ACTION_POTENTIAL	GOBP_REGULATION_OF_ACTION_POTENTIAL	GOBP_REGULATION_OF_ACTION_POTENTIAL	2/189	23/5089	0.209589	0.593124	0.514781	Cd36/Adra1a	2	GO BP	up	NP
GOBP_VIRION_ASSEMBLY	GOBP_VIRION_ASSEMBLY	GOBP_VIRION_ASSEMBLY	2/189	23/5089	0.209589	0.593124	0.514781	Apoe/Pcx	2	GO BP	up	NP
GOBP_FIBROBLAST_PROLIFERATION	GOBP_FIBROBLAST_PROLIFERATION	GOBP_FIBROBLAST_PROLIFERATION	3/189	43/5089	0.213342	0.59564	0.516965	Trp53inp1/Agt/Jun	3	GO BP	up	NP
GOBP_REGULATION_OF_ORGAN_GROWTH	GOBP_REGULATION_OF_ORGAN_GROWTH	GOBP_REGULATION_OF_ORGAN_GROWTH	3/189	43/5089	0.213342	0.59564	0.516965	Hamp/Cited2/Bcl2l11	3	GO BP	up	NP
GOBP_VITAMIN_METABOLIC_PROCESS	GOBP_VITAMIN_METABOLIC_PROCESS	GOBP_VITAMIN_METABOLIC_PROCESS	3/189	44/5089	0.22317	0.615491	0.534194	Cyp27a1/Cyp3a11/Pltp	3	GO BP	up	NP
GOBP_ANIMAL_ORGAN_FORMATION	GOBP_ANIMAL_ORGAN_FORMATION	GOBP_ANIMAL_ORGAN_FORMATION	2/189	24/5089	0.223411	0.615491	0.534194	Robo1/Cited2	2	GO BP	up	NP
GOBP_DEVELOPMENT_OF_PRIMARY_SEXUAL_CHARACTERISTICS	GOBP_DEVELOPMENT_OF_PRIMARY_SEXUAL_CHARACTERISTICS	GOBP_DEVELOPMENT_OF_PRIMARY_SEXUAL_CHARACTERISTICS	5/189	88/5089	0.227846	0.622547	0.540318	H3f3b/Tiparp/Cited2/Msh2/Bcl2l11	5	GO BP	up	NP
GOBP_LOCOMOTORY_BEHAVIOR	GOBP_LOCOMOTORY_BEHAVIOR	GOBP_LOCOMOTORY_BEHAVIOR	4/189	66/5089	0.228965	0.622547	0.540318	Apoe/Abat/Cxcl12/Reln	4	GO BP	up	NP
GOBP_REGULATION_OF_DNA_BINDING_TRANSCRIPTION_FACTOR_ACTIVITY	GOBP_REGULATION_OF_DNA_BINDING_TRANSCRIPTION_FACTOR_ACTIVITY	GOBP_REGULATION_OF_DNA_BINDING_TRANSCRIPTION_FACTOR_ACTIVITY	10/189	206/5089	0.234579	0.625116	0.542548	Cth/Agt/Cd36/Ppargc1b/Rwdd3/Smad7/Pparg/Il18/Tmsb4x/Reln	10	GO BP	up	NP
GOBP_OSTEOBLAST_DIFFERENTIATION	GOBP_OSTEOBLAST_DIFFERENTIATION	GOBP_OSTEOBLAST_DIFFERENTIATION	6/189	112/5089	0.23604	0.625116	0.542548	H3f3b/Map2k6/Junb/Jund/Pparg/Cebpd	6	GO BP	up	NP
GOBP_ENERGY_HOMEOSTASIS	GOBP_ENERGY_HOMEOSTASIS	GOBP_ENERGY_HOMEOSTASIS	2/189	25/5089	0.237302	0.625116	0.542548	Cd36/Pm20d1	2	GO BP	up	NP
GOBP_TRICARBOXYLIC_ACID_CYCLE	GOBP_TRICARBOXYLIC_ACID_CYCLE	GOBP_TRICARBOXYLIC_ACID_CYCLE	2/189	25/5089	0.237302	0.625116	0.542548	Dhtkd1/Idh2	2	GO BP	up	NP
GOBP_REGULATION_OF_ANATOMICAL_STRUCTURE_SIZE	GOBP_REGULATION_OF_ANATOMICAL_STRUCTURE_SIZE	GOBP_REGULATION_OF_ANATOMICAL_STRUCTURE_SIZE	11/189	231/5089	0.238492	0.625116	0.542548	Fgg/Kng2/Fgb/Apoe/Fga/Cxcl12/Agt/Adra1a/Rtn4/Prkg1/Tmsb4x	11	GO BP	up	NP
GOBP_CELL_SUBSTRATE_ADHESION	GOBP_CELL_SUBSTRATE_ADHESION	GOBP_CELL_SUBSTRATE_ADHESION	9/189	183/5089	0.238927	0.625116	0.542548	Dlc1/Fgg/Fgb/Fga/Angptl3/St6gal1/Cd36/S100a10/Bcl2l11	9	GO BP	up	NP
GOBP_DEMETHYLATION	GOBP_DEMETHYLATION	GOBP_DEMETHYLATION	3/189	46/5089	0.24308	0.628083	0.545123	Cyp3a25/Cyp3a11/Kdm2b	3	GO BP	up	NP
GOBP_RENAL_SYSTEM_PROCESS	GOBP_RENAL_SYSTEM_PROCESS	GOBP_RENAL_SYSTEM_PROCESS	3/189	46/5089	0.24308	0.628083	0.545123	Agt/Sucnr1/Adra1a	3	GO BP	up	NP
GOBP_MULTICELLULAR_ORGANISM_REPRODUCTION	GOBP_MULTICELLULAR_ORGANISM_REPRODUCTION	GOBP_MULTICELLULAR_ORGANISM_REPRODUCTION	13/189	283/5089	0.251496	0.64303	0.558095	H3f3b/Map2k6/Syne1/Hpgd/Junb/Kdm2b/Btg1/Wipf3/Gamt/Cited2/Msh2/Bcl2l11/Thra	13	GO BP	up	NP
GOBP_POST_EMBRYONIC_DEVELOPMENT	GOBP_POST_EMBRYONIC_DEVELOPMENT	GOBP_POST_EMBRYONIC_DEVELOPMENT	3/189	47/5089	0.253144	0.64303	0.558095	Tiparp/Mmut/Bcl2l11	3	GO BP	up	NP
GOBP_OSSIFICATION	GOBP_OSSIFICATION	GOBP_OSSIFICATION	9/189	186/5089	0.253502	0.64303	0.558095	H3f3b/Map2k6/Ppargc1b/Junb/Jund/Smad7/Pparg/Cebpd/Thra	9	GO BP	up	NP
GOBP_INTRACELLULAR_RECEPTOR_SIGNALING_PATHWAY	GOBP_INTRACELLULAR_RECEPTOR_SIGNALING_PATHWAY	GOBP_INTRACELLULAR_RECEPTOR_SIGNALING_PATHWAY	8/189	164/5089	0.263944	0.66546	0.577562	Rnf125/Map2k6/Ahr/Ppargc1b/Nr4a1/Pparg/Cited2/Thra	8	GO BP	up	NP
GOBP_REGULATION_OF_TRANSMEMBRANE_TRANSPORT	GOBP_REGULATION_OF_TRANSMEMBRANE_TRANSPORT	GOBP_REGULATION_OF_TRANSMEMBRANE_TRANSPORT	9/189	189/5089	0.268367	0.672535	0.583703	Hamp/Irs2/Psen2/Ank3/Agt/Pm20d1/Gpd1l/Tmsb4x/Reln	9	GO BP	up	NP
GOBP_RESPONSE_TO_OXIDATIVE_STRESS	GOBP_RESPONSE_TO_OXIDATIVE_STRESS	GOBP_RESPONSE_TO_OXIDATIVE_STRESS	11/189	240/5089	0.278046	0.691233	0.599932	Apoe/Mgst1/Car3/Trp53inp1/Pdk1/Cd36/Ppargc1b/Jun/Chchd2/Btg1/Prdx5	11	GO BP	up	NP
GOBP_INTERLEUKIN_8_PRODUCTION	GOBP_INTERLEUKIN_8_PRODUCTION	GOBP_INTERLEUKIN_8_PRODUCTION	2/189	28/5089	0.279152	0.691233	0.599932	Apoa2/Tmsb4x	2	GO BP	up	NP
GOBP_PATTERN_SPECIFICATION_PROCESS	GOBP_PATTERN_SPECIFICATION_PROCESS	GOBP_PATTERN_SPECIFICATION_PROCESS	7/189	143/5089	0.280854	0.691332	0.600017	Btg2/Robo1/Nrp2/Plxna2/Kdm2b/Cited2/Reln	7	GO BP	up	NP
GOBP_BIOLOGICAL_PROCESS_INVOLVED_IN_INTERACTION_WITH_SYMBIONT	GOBP_BIOLOGICAL_PROCESS_INVOLVED_IN_INTERACTION_WITH_SYMBIONT	GOBP_BIOLOGICAL_PROCESS_INVOLVED_IN_INTERACTION_WITH_SYMBIONT	3/189	50/5089	0.283655	0.69412	0.602437	Apoe/Pcx/Jun	3	GO BP	up	NP
GOBP_MALE_SEX_DIFFERENTIATION	GOBP_MALE_SEX_DIFFERENTIATION	GOBP_MALE_SEX_DIFFERENTIATION	4/189	73/5089	0.286584	0.697187	0.605099	H3f3b/Cited2/Msh2/Bcl2l11	4	GO BP	up	NP
GOBP_MYELOID_CELL_HOMEOSTASIS	GOBP_MYELOID_CELL_HOMEOSTASIS	GOBP_MYELOID_CELL_HOMEOSTASIS	5/189	97/5089	0.291734	0.703758	0.610802	Hamp/Zfp36l1/Cited2/Bcl2l11/Thra	5	GO BP	up	NP
GOBP_REGULATION_OF_IMMUNE_EFFECTOR_PROCESS	GOBP_REGULATION_OF_IMMUNE_EFFECTOR_PROCESS	GOBP_REGULATION_OF_IMMUNE_EFFECTOR_PROCESS	7/189	145/5089	0.292669	0.703758	0.610802	Apoa2/Ahr/Cd36/Smad7/Cd81/Il18/Msh2	7	GO BP	up	NP
GOBP_MONOSACCHARIDE_METABOLIC_PROCESS	GOBP_MONOSACCHARIDE_METABOLIC_PROCESS	GOBP_MONOSACCHARIDE_METABOLIC_PROCESS	7/189	146/5089	0.298619	0.712896	0.618733	Gnmt/Pcx/Ppp1r3g/Irs2/Pfkfb1/Dhdh/Pdk1	7	GO BP	up	NP
GOBP_MYELOID_LEUKOCYTE_ACTIVATION	GOBP_MYELOID_LEUKOCYTE_ACTIVATION	GOBP_MYELOID_LEUKOCYTE_ACTIVATION	5/189	99/5089	0.306379	0.712896	0.618733	Hamp/Jun/Sucnr1/Jund/Il18	5	GO BP	up	NP
GOBP_CARBOHYDRATE_HOMEOSTASIS	GOBP_CARBOHYDRATE_HOMEOSTASIS	GOBP_CARBOHYDRATE_HOMEOSTASIS	6/189	124/5089	0.312869	0.712896	0.618733	Ppp1r3g/Irs2/Cyp7a1/Sucnr1/Pparg/Rab11fip2	6	GO BP	up	NP
GOBP_APOPTOTIC_PROCESS_INVOLVED_IN_MORPHOGENESIS	GOBP_APOPTOTIC_PROCESS_INVOLVED_IN_MORPHOGENESIS	GOBP_APOPTOTIC_PROCESS_INVOLVED_IN_MORPHOGENESIS	1/189	5089-10-01	0.315319	0.712896	0.618733	Bcl2l11	1	GO BP	up	NP
GOBP_DEVELOPMENTAL_INDUCTION	GOBP_DEVELOPMENTAL_INDUCTION	GOBP_DEVELOPMENTAL_INDUCTION	1/189	5089-10-01	0.315319	0.712896	0.618733	Robo1	1	GO BP	up	NP
GOBP_INTERLEUKIN_17_PRODUCTION	GOBP_INTERLEUKIN_17_PRODUCTION	GOBP_INTERLEUKIN_17_PRODUCTION	1/189	5089-10-01	0.315319	0.712896	0.618733	Il18	1	GO BP	up	NP
GOBP_MYOBLAST_PROLIFERATION	GOBP_MYOBLAST_PROLIFERATION	GOBP_MYOBLAST_PROLIFERATION	1/189	5089-10-01	0.315319	0.712896	0.618733	Atoh8	1	GO BP	up	NP
GOBP_REGULATION_OF_SYNCYTIUM_FORMATION_BY_PLASMA_MEMBRANE_FUSION	GOBP_REGULATION_OF_SYNCYTIUM_FORMATION_BY_PLASMA_MEMBRANE_FUSION	GOBP_REGULATION_OF_SYNCYTIUM_FORMATION_BY_PLASMA_MEMBRANE_FUSION	1/189	5089-10-01	0.315319	0.712896	0.618733	Gdf15	1	GO BP	up	NP
GOBP_RESPONSE_TO_MUSCLE_ACTIVITY	GOBP_RESPONSE_TO_MUSCLE_ACTIVITY	GOBP_RESPONSE_TO_MUSCLE_ACTIVITY	1/189	5089-10-01	0.315319	0.712896	0.618733	Agt	1	GO BP	up	NP
GOBP_TRANSPORT_OF_VIRUS	GOBP_TRANSPORT_OF_VIRUS	GOBP_TRANSPORT_OF_VIRUS	1/189	5089-10-01	0.315319	0.712896	0.618733	Ctsl	1	GO BP	up	NP
GOBP_VENTRAL_SPINAL_CORD_DEVELOPMENT	GOBP_VENTRAL_SPINAL_CORD_DEVELOPMENT	GOBP_VENTRAL_SPINAL_CORD_DEVELOPMENT	1/189	5089-10-01	0.315319	0.712896	0.618733	Reln	1	GO BP	up	NP
GOBP_NERVE_DEVELOPMENT	GOBP_NERVE_DEVELOPMENT	GOBP_NERVE_DEVELOPMENT	2/189	31/5089	0.32085	0.717599	0.622815	Nrp2/Cited2	2	GO BP	up	NP
GOBP_REGULATION_OF_DENDRITIC_SPINE_DEVELOPMENT	GOBP_REGULATION_OF_DENDRITIC_SPINE_DEVELOPMENT	GOBP_REGULATION_OF_DENDRITIC_SPINE_DEVELOPMENT	2/189	31/5089	0.32085	0.717599	0.622815	Apoe/Reln	2	GO BP	up	NP
GOBP_CELLULAR_RESPONSE_TO_ABIOTIC_STIMULUS	GOBP_CELLULAR_RESPONSE_TO_ABIOTIC_STIMULUS	GOBP_CELLULAR_RESPONSE_TO_ABIOTIC_STIMULUS	7/189	150/5089	0.322671	0.717813	0.623001	Trp53inp1/Hamp/Zfp36l1/Blm/Serpinb6a/Agt/Gtf2h5	7	GO BP	up	NP
GOBP_LEUKOCYTE_CHEMOTAXIS	GOBP_LEUKOCYTE_CHEMOTAXIS	GOBP_LEUKOCYTE_CHEMOTAXIS	4/189	78/5089	0.328949	0.724035	0.628401	Rarres2/Cxcl12/Ddt/Mospd2	4	GO BP	up	NP
GOBP_RESPONSE_TO_NUTRIENT	GOBP_RESPONSE_TO_NUTRIENT	GOBP_RESPONSE_TO_NUTRIENT	4/189	78/5089	0.328949	0.724035	0.628401	Hamp/Bche/Igfbp2/Pparg	4	GO BP	up	NP
GOBP_BLASTOCYST_GROWTH	GOBP_BLASTOCYST_GROWTH	GOBP_BLASTOCYST_GROWTH	1/189	5089-11-01	0.340798	0.734569	0.637544	Rad51b	1	GO BP	up	NP
GOBP_COCHLEA_DEVELOPMENT	GOBP_COCHLEA_DEVELOPMENT	GOBP_COCHLEA_DEVELOPMENT	1/189	5089-11-01	0.340798	0.734569	0.637544	Slc17a8	1	GO BP	up	NP
GOBP_IMMUNE_RESPONSE_TO_TUMOR_CELL	GOBP_IMMUNE_RESPONSE_TO_TUMOR_CELL	GOBP_IMMUNE_RESPONSE_TO_TUMOR_CELL	1/189	5089-11-01	0.340798	0.734569	0.637544	Ahr	1	GO BP	up	NP
GOBP_SYNAPSE_MATURATION	GOBP_SYNAPSE_MATURATION	GOBP_SYNAPSE_MATURATION	1/189	5089-11-01	0.340798	0.734569	0.637544	Reln	1	GO BP	up	NP
GOBP_HIPPOCAMPUS_DEVELOPMENT	GOBP_HIPPOCAMPUS_DEVELOPMENT	GOBP_HIPPOCAMPUS_DEVELOPMENT	2/189	33/5089	0.348338	0.73933	0.641676	Btg2/Reln	2	GO BP	up	NP
GOBP_PRODUCTION_OF_MOLECULAR_MEDIATOR_INVOLVED_IN_INFLAMMATORY_RESPONSE	GOBP_PRODUCTION_OF_MOLECULAR_MEDIATOR_INVOLVED_IN_INFLAMMATORY_RESPONSE	GOBP_PRODUCTION_OF_MOLECULAR_MEDIATOR_INVOLVED_IN_INFLAMMATORY_RESPONSE	2/189	33/5089	0.348338	0.73933	0.641676	Pdcd4/Cd36	2	GO BP	up	NP
GOBP_TISSUE_REGENERATION	GOBP_TISSUE_REGENERATION	GOBP_TISSUE_REGENERATION	2/189	33/5089	0.348338	0.73933	0.641676	Igfbp1/Cd81	2	GO BP	up	NP
GOBP_CARDIAC_CHAMBER_DEVELOPMENT	GOBP_CARDIAC_CHAMBER_DEVELOPMENT	GOBP_CARDIAC_CHAMBER_DEVELOPMENT	4/189	81/5089	0.354568	0.743424	0.645229	Robo1/Nrp2/Smad7/Cited2	4	GO BP	up	NP
GOBP_MULTICELLULAR_ORGANISM_GROWTH	GOBP_MULTICELLULAR_ORGANISM_GROWTH	GOBP_MULTICELLULAR_ORGANISM_GROWTH	4/189	81/5089	0.354568	0.743424	0.645229	H3f3b/Zfp36l1/Gdf15/Gamt	4	GO BP	up	NP
GOBP_THIOESTER_METABOLIC_PROCESS	GOBP_THIOESTER_METABOLIC_PROCESS	GOBP_THIOESTER_METABOLIC_PROCESS	3/189	57/5089	0.355629	0.743424	0.645229	Pdk1/Hmgcs1/Mcee	3	GO BP	up	NP
GOBP_MEIOSIS_I_CELL_CYCLE_PROCESS	GOBP_MEIOSIS_I_CELL_CYCLE_PROCESS	GOBP_MEIOSIS_I_CELL_CYCLE_PROCESS	2/189	34/5089	0.361947	0.745397	0.646941	Rad51b/Bcl2l11	2	GO BP	up	NP
GOBP_REGULATION_OF_MULTICELLULAR_ORGANISM_GROWTH	GOBP_REGULATION_OF_MULTICELLULAR_ORGANISM_GROWTH	GOBP_REGULATION_OF_MULTICELLULAR_ORGANISM_GROWTH	2/189	34/5089	0.361947	0.745397	0.646941	Gdf15/Gamt	2	GO BP	up	NP
GOBP_ROOF_OF_MOUTH_DEVELOPMENT	GOBP_ROOF_OF_MOUTH_DEVELOPMENT	GOBP_ROOF_OF_MOUTH_DEVELOPMENT	2/189	34/5089	0.361947	0.745397	0.646941	Insig1/Tiparp	2	GO BP	up	NP
GOBP_LYMPHOCYTE_COSTIMULATION	GOBP_LYMPHOCYTE_COSTIMULATION	GOBP_LYMPHOCYTE_COSTIMULATION	1/189	5089-12-01	0.365333	0.748663	0.649775	Cd81	1	GO BP	up	NP
GOBP_G_PROTEIN_COUPLED_RECEPTOR_SIGNALING_PATHWAY	GOBP_G_PROTEIN_COUPLED_RECEPTOR_SIGNALING_PATHWAY	GOBP_G_PROTEIN_COUPLED_RECEPTOR_SIGNALING_PATHWAY	8/189	183/5089	0.369698	0.753894	0.654316	Rgs16/Apoe/Cxcl12/Hpgd/Agt/Sucnr1/Adra1a/Pparg	8	GO BP	up	NP
GOBP_LENS_DEVELOPMENT_IN_CAMERA_TYPE_EYE	GOBP_LENS_DEVELOPMENT_IN_CAMERA_TYPE_EYE	GOBP_LENS_DEVELOPMENT_IN_CAMERA_TYPE_EYE	2/189	35/5089	0.37545	0.761889	0.661255	Nhs/Cited2	2	GO BP	up	NP
GOBP_SEX_DIFFERENTIATION	GOBP_SEX_DIFFERENTIATION	GOBP_SEX_DIFFERENTIATION	5/189	109/5089	0.380741	0.768875	0.667318	H3f3b/Tiparp/Cited2/Msh2/Bcl2l11	5	GO BP	up	NP
GOBP_CELL_COMMUNICATION_BY_ELECTRICAL_COUPLING	GOBP_CELL_COMMUNICATION_BY_ELECTRICAL_COUPLING	GOBP_CELL_COMMUNICATION_BY_ELECTRICAL_COUPLING	1/189	13/5089	0.388959	0.77051	0.668737	Ank3	1	GO BP	up	NP
GOBP_HEAD_MORPHOGENESIS	GOBP_HEAD_MORPHOGENESIS	GOBP_HEAD_MORPHOGENESIS	1/189	13/5089	0.388959	0.77051	0.668737	Tiparp	1	GO BP	up	NP
GOBP_MULTICELLULAR_ORGANISMAL_MOVEMENT	GOBP_MULTICELLULAR_ORGANISMAL_MOVEMENT	GOBP_MULTICELLULAR_ORGANISMAL_MOVEMENT	1/189	13/5089	0.388959	0.77051	0.668737	Nr4a1	1	GO BP	up	NP
GOBP_PHAGOCYTOSIS_RECOGNITION	GOBP_PHAGOCYTOSIS_RECOGNITION	GOBP_PHAGOCYTOSIS_RECOGNITION	1/189	13/5089	0.388959	0.77051	0.668737	Cd36	1	GO BP	up	NP
GOBP_REGULATION_OF_CELLULAR_RESPONSE_TO_GROWTH_FACTOR_STIMULUS	GOBP_REGULATION_OF_CELLULAR_RESPONSE_TO_GROWTH_FACTOR_STIMULUS	GOBP_REGULATION_OF_CELLULAR_RESPONSE_TO_GROWTH_FACTOR_STIMULUS	6/189	136/5089	0.393142	0.774346	0.672066	Robo1/Agt/Smad7/Pparg/Cited2/Dcn	6	GO BP	up	NP
GOBP_CIRCADIAN_RHYTHM	GOBP_CIRCADIAN_RHYTHM	GOBP_CIRCADIAN_RHYTHM	5/189	111/5089	0.39568	0.774346	0.672066	Nfil3/Ahr/Jund/Pparg/Npas2	5	GO BP	up	NP
GOBP_REGULATION_OF_SYNAPTIC_PLASTICITY	GOBP_REGULATION_OF_SYNAPTIC_PLASTICITY	GOBP_REGULATION_OF_SYNAPTIC_PLASTICITY	3/189	61/5089	0.39648	0.774346	0.672066	Apoe/Agt/Reln	3	GO BP	up	NP
GOBP_ER_NUCLEUS_SIGNALING_PATHWAY	GOBP_ER_NUCLEUS_SIGNALING_PATHWAY	GOBP_ER_NUCLEUS_SIGNALING_PATHWAY	2/189	37/5089	0.402095	0.780028	0.676998	Insig1/Bcl2l11	2	GO BP	up	NP
GOBP_DENDRITE_DEVELOPMENT	GOBP_DENDRITE_DEVELOPMENT	GOBP_DENDRITE_DEVELOPMENT	5/189	112/5089	0.403139	0.780028	0.676998	Apoe/Fbxo31/Prkg1/Dcdc2a/Reln	5	GO BP	up	NP
GOBP_C21_STEROID_HORMONE_METABOLIC_PROCESS	GOBP_C21_STEROID_HORMONE_METABOLIC_PROCESS	GOBP_C21_STEROID_HORMONE_METABOLIC_PROCESS	1/189	14/5089	0.411711	0.78565	0.681878	Akr1d1	1	GO BP	up	NP
GOBP_OLFACTORY_LOBE_DEVELOPMENT	GOBP_OLFACTORY_LOBE_DEVELOPMENT	GOBP_OLFACTORY_LOBE_DEVELOPMENT	1/189	14/5089	0.411711	0.78565	0.681878	Robo1	1	GO BP	up	NP
GOBP_POSITIVE_T_CELL_SELECTION	GOBP_POSITIVE_T_CELL_SELECTION	GOBP_POSITIVE_T_CELL_SELECTION	1/189	14/5089	0.411711	0.78565	0.681878	Ctsl	1	GO BP	up	NP
GOBP_CELLULAR_ALDEHYDE_METABOLIC_PROCESS	GOBP_CELLULAR_ALDEHYDE_METABOLIC_PROCESS	GOBP_CELLULAR_ALDEHYDE_METABOLIC_PROCESS	2/189	38/5089	0.415217	0.788723	0.684544	Agxt/Idh2	2	GO BP	up	NP
GOBP_ANTIGEN_PROCESSING_AND_PRESENTATION_OF_PEPTIDE_OR_POLYSACCHARIDE_ANTIGEN_VIA_MHC_CLASS_II	GOBP_ANTIGEN_PROCESSING_AND_PRESENTATION_OF_PEPTIDE_OR_POLYSACCHARIDE_ANTIGEN_VIA_MHC_CLASS_II	GOBP_ANTIGEN_PROCESSING_AND_PRESENTATION_OF_PEPTIDE_OR_POLYSACCHARIDE_ANTIGEN_VIA_MHC_CLASS_II	1/189	15/5089	0.43362	0.798167	0.692741	Ctsl	1	GO BP	up	NP
GOBP_APOPTOTIC_PROCESS_INVOLVED_IN_DEVELOPMENT	GOBP_APOPTOTIC_PROCESS_INVOLVED_IN_DEVELOPMENT	GOBP_APOPTOTIC_PROCESS_INVOLVED_IN_DEVELOPMENT	1/189	15/5089	0.43362	0.798167	0.692741	Bcl2l11	1	GO BP	up	NP
GOBP_DIENCEPHALON_DEVELOPMENT	GOBP_DIENCEPHALON_DEVELOPMENT	GOBP_DIENCEPHALON_DEVELOPMENT	1/189	15/5089	0.43362	0.798167	0.692741	Nrp2	1	GO BP	up	NP
GOBP_MUSCLE_HYPERTROPHY_IN_RESPONSE_TO_STRESS	GOBP_MUSCLE_HYPERTROPHY_IN_RESPONSE_TO_STRESS	GOBP_MUSCLE_HYPERTROPHY_IN_RESPONSE_TO_STRESS	1/189	15/5089	0.43362	0.798167	0.692741	Pparg	1	GO BP	up	NP
GOBP_OSTEOBLAST_PROLIFERATION	GOBP_OSTEOBLAST_PROLIFERATION	GOBP_OSTEOBLAST_PROLIFERATION	1/189	15/5089	0.43362	0.798167	0.692741	Junb	1	GO BP	up	NP
GOBP_RESPONSE_TO_NICOTINE	GOBP_RESPONSE_TO_NICOTINE	GOBP_RESPONSE_TO_NICOTINE	1/189	15/5089	0.43362	0.798167	0.692741	Abat	1	GO BP	up	NP
GOBP_RESPONSE_TO_STEROL_DEPLETION	GOBP_RESPONSE_TO_STEROL_DEPLETION	GOBP_RESPONSE_TO_STEROL_DEPLETION	1/189	15/5089	0.43362	0.798167	0.692741	Insig1	1	GO BP	up	NP
GOBP_REGULATION_OF_TRANS_SYNAPTIC_SIGNALING	GOBP_REGULATION_OF_TRANS_SYNAPTIC_SIGNALING	GOBP_REGULATION_OF_TRANS_SYNAPTIC_SIGNALING	6/189	143/5089	0.440115	0.801534	0.695664	Apoe/Lrrc4/Bche/Agt/Adra1a/Reln	6	GO BP	up	NP
GOBP_CELLULAR_RESPONSE_TO_BIOTIC_STIMULUS	GOBP_CELLULAR_RESPONSE_TO_BIOTIC_STIMULUS	GOBP_CELLULAR_RESPONSE_TO_BIOTIC_STIMULUS	5/189	117/5089	0.440244	0.801534	0.695664	Hamp/Pdcd4/Cd36/Il18/Bcl2l11	5	GO BP	up	NP
GOBP_METHYLATION	GOBP_METHYLATION	GOBP_METHYLATION	8/189	197/5089	0.450016	0.801534	0.695664	Bhmt/Gnmt/Bhmt2/Btg2/Inmt/Btg1/Gamt/Mettl15	8	GO BP	up	NP
GOBP_CELL_CYCLE_DNA_REPLICATION	GOBP_CELL_CYCLE_DNA_REPLICATION	GOBP_CELL_CYCLE_DNA_REPLICATION	1/189	16/5089	0.454717	0.801534	0.695664	Blm	1	GO BP	up	NP
GOBP_ENDOCARDIAL_CUSHION_FORMATION	GOBP_ENDOCARDIAL_CUSHION_FORMATION	GOBP_ENDOCARDIAL_CUSHION_FORMATION	1/189	16/5089	0.454717	0.801534	0.695664	Robo1	1	GO BP	up	NP
GOBP_HINDBRAIN_MORPHOGENESIS	GOBP_HINDBRAIN_MORPHOGENESIS	GOBP_HINDBRAIN_MORPHOGENESIS	1/189	16/5089	0.454717	0.801534	0.695664	Dlc1	1	GO BP	up	NP
GOBP_LENS_MORPHOGENESIS_IN_CAMERA_TYPE_EYE	GOBP_LENS_MORPHOGENESIS_IN_CAMERA_TYPE_EYE	GOBP_LENS_MORPHOGENESIS_IN_CAMERA_TYPE_EYE	1/189	16/5089	0.454717	0.801534	0.695664	Cited2	1	GO BP	up	NP
GOBP_OVULATION_CYCLE_PROCESS	GOBP_OVULATION_CYCLE_PROCESS	GOBP_OVULATION_CYCLE_PROCESS	1/189	16/5089	0.454717	0.801534	0.695664	Map2k6	1	GO BP	up	NP
GOBP_SPERM_MOTILITY	GOBP_SPERM_MOTILITY	GOBP_SPERM_MOTILITY	1/189	16/5089	0.454717	0.801534	0.695664	Pltp	1	GO BP	up	NP
GOBP_VIRAL_RELEASE_FROM_HOST_CELL	GOBP_VIRAL_RELEASE_FROM_HOST_CELL	GOBP_VIRAL_RELEASE_FROM_HOST_CELL	1/189	16/5089	0.454717	0.801534	0.695664	Pcx	1	GO BP	up	NP
GOBP_MONONUCLEAR_CELL_MIGRATION	GOBP_MONONUCLEAR_CELL_MIGRATION	GOBP_MONONUCLEAR_CELL_MIGRATION	3/189	68/5089	0.466086	0.818109	0.710049	Rarres2/Cxcl12/Mospd2	3	GO BP	up	NP
GOBP_DOPAMINE_RECEPTOR_SIGNALING_PATHWAY	GOBP_DOPAMINE_RECEPTOR_SIGNALING_PATHWAY	GOBP_DOPAMINE_RECEPTOR_SIGNALING_PATHWAY	1/189	17/5089	0.475032	0.826834	0.717621	Sult1a1	1	GO BP	up	NP
GOBP_REGULATION_OF_STEM_CELL_POPULATION_MAINTENANCE	GOBP_REGULATION_OF_STEM_CELL_POPULATION_MAINTENANCE	GOBP_REGULATION_OF_STEM_CELL_POPULATION_MAINTENANCE	1/189	17/5089	0.475032	0.826834	0.717621	Kdm2b	1	GO BP	up	NP
GOBP_METENCEPHALON_DEVELOPMENT	GOBP_METENCEPHALON_DEVELOPMENT	GOBP_METENCEPHALON_DEVELOPMENT	2/189	43/5089	0.478528	0.828297	0.718891	Abat/Dixdc1	2	GO BP	up	NP
GOBP_RHYTHMIC_PROCESS	GOBP_RHYTHMIC_PROCESS	GOBP_RHYTHMIC_PROCESS	6/189	149/5089	0.479855	0.828297	0.718891	Nfil3/Map2k6/Ahr/Jund/Pparg/Npas2	6	GO BP	up	NP
GOBP_REGULATION_OF_CELLULAR_RESPONSE_TO_INSULIN_STIMULUS	GOBP_REGULATION_OF_CELLULAR_RESPONSE_TO_INSULIN_STIMULUS	GOBP_REGULATION_OF_CELLULAR_RESPONSE_TO_INSULIN_STIMULUS	2/189	44/5089	0.490688	0.829531	0.719962	Agt/Ptpre	2	GO BP	up	NP
GOBP_CELL_CELL_RECOGNITION	GOBP_CELL_CELL_RECOGNITION	GOBP_CELL_CELL_RECOGNITION	1/189	18/5089	0.494594	0.829531	0.719962	Cd81	1	GO BP	up	NP
GOBP_CILIUM_OR_FLAGELLUM_DEPENDENT_CELL_MOTILITY	GOBP_CILIUM_OR_FLAGELLUM_DEPENDENT_CELL_MOTILITY	GOBP_CILIUM_OR_FLAGELLUM_DEPENDENT_CELL_MOTILITY	1/189	18/5089	0.494594	0.829531	0.719962	Pltp	1	GO BP	up	NP
GOBP_COLLAGEN_BIOSYNTHETIC_PROCESS	GOBP_COLLAGEN_BIOSYNTHETIC_PROCESS	GOBP_COLLAGEN_BIOSYNTHETIC_PROCESS	1/189	18/5089	0.494594	0.829531	0.719962	Cyp7a1	1	GO BP	up	NP
GOBP_CYTOKINE_PRODUCTION_INVOLVED_IN_INFLAMMATORY_RESPONSE	GOBP_CYTOKINE_PRODUCTION_INVOLVED_IN_INFLAMMATORY_RESPONSE	GOBP_CYTOKINE_PRODUCTION_INVOLVED_IN_INFLAMMATORY_RESPONSE	1/189	18/5089	0.494594	0.829531	0.719962	Pdcd4	1	GO BP	up	NP
GOBP_DETECTION_OF_STIMULUS_INVOLVED_IN_SENSORY_PERCEPTION	GOBP_DETECTION_OF_STIMULUS_INVOLVED_IN_SENSORY_PERCEPTION	GOBP_DETECTION_OF_STIMULUS_INVOLVED_IN_SENSORY_PERCEPTION	1/189	18/5089	0.494594	0.829531	0.719962	Cxcl12	1	GO BP	up	NP
GOBP_NEURAL_RETINA_DEVELOPMENT	GOBP_NEURAL_RETINA_DEVELOPMENT	GOBP_NEURAL_RETINA_DEVELOPMENT	1/189	18/5089	0.494594	0.829531	0.719962	Slc17a8	1	GO BP	up	NP
GOBP_CELL_ACTIVATION_INVOLVED_IN_IMMUNE_RESPONSE	GOBP_CELL_ACTIVATION_INVOLVED_IN_IMMUNE_RESPONSE	GOBP_CELL_ACTIVATION_INVOLVED_IN_IMMUNE_RESPONSE	5/189	127/5089	0.512584	0.829531	0.719962	Sucnr1/Smad7/Cd81/Il18/Msh2	5	GO BP	up	NP
GOBP_BODY_MORPHOGENESIS	GOBP_BODY_MORPHOGENESIS	GOBP_BODY_MORPHOGENESIS	1/189	19/5089	0.513431	0.829531	0.719962	Tiparp	1	GO BP	up	NP
GOBP_CEREBELLAR_CORTEX_DEVELOPMENT	GOBP_CEREBELLAR_CORTEX_DEVELOPMENT	GOBP_CEREBELLAR_CORTEX_DEVELOPMENT	1/189	19/5089	0.513431	0.829531	0.719962	Dixdc1	1	GO BP	up	NP
GOBP_LOW_DENSITY_LIPOPROTEIN_PARTICLE_CLEARANCE	GOBP_LOW_DENSITY_LIPOPROTEIN_PARTICLE_CLEARANCE	GOBP_LOW_DENSITY_LIPOPROTEIN_PARTICLE_CLEARANCE	1/189	19/5089	0.513431	0.829531	0.719962	Cd36	1	GO BP	up	NP
GOBP_RETINOL_METABOLIC_PROCESS	GOBP_RETINOL_METABOLIC_PROCESS	GOBP_RETINOL_METABOLIC_PROCESS	1/189	19/5089	0.513431	0.829531	0.719962	Cyp3a11	1	GO BP	up	NP
GOBP_SOMITOGENESIS	GOBP_SOMITOGENESIS	GOBP_SOMITOGENESIS	1/189	19/5089	0.513431	0.829531	0.719962	Plxna2	1	GO BP	up	NP
GOBP_VESICLE_CARGO_LOADING	GOBP_VESICLE_CARGO_LOADING	GOBP_VESICLE_CARGO_LOADING	1/189	19/5089	0.513431	0.829531	0.719962	Insig1	1	GO BP	up	NP
GOBP_ADULT_BEHAVIOR	GOBP_ADULT_BEHAVIOR	GOBP_ADULT_BEHAVIOR	2/189	46/5089	0.514469	0.829531	0.719962	Abat/Cxcl12	2	GO BP	up	NP
GOBP_DENDRITIC_SPINE_DEVELOPMENT	GOBP_DENDRITIC_SPINE_DEVELOPMENT	GOBP_DENDRITIC_SPINE_DEVELOPMENT	2/189	46/5089	0.514469	0.829531	0.719962	Apoe/Reln	2	GO BP	up	NP
GOBP_REGULATION_OF_DENDRITE_DEVELOPMENT	GOBP_REGULATION_OF_DENDRITE_DEVELOPMENT	GOBP_REGULATION_OF_DENDRITE_DEVELOPMENT	2/189	46/5089	0.514469	0.829531	0.719962	Fbxo31/Reln	2	GO BP	up	NP
GOBP_GAMETE_GENERATION	GOBP_GAMETE_GENERATION	GOBP_GAMETE_GENERATION	9/189	237/5089	0.522525	0.839268	0.728413	H3f3b/Syne1/Hpgd/Kdm2b/Btg1/Wipf3/Gamt/Msh2/Bcl2l11	9	GO BP	up	NP
GOBP_REGULATION_OF_SIGNALING_RECEPTOR_ACTIVITY	GOBP_REGULATION_OF_SIGNALING_RECEPTOR_ACTIVITY	GOBP_REGULATION_OF_SIGNALING_RECEPTOR_ACTIVITY	2/189	47/5089	0.526083	0.840809	0.729751	Pparg/Reln	2	GO BP	up	NP
GOBP_FACE_DEVELOPMENT	GOBP_FACE_DEVELOPMENT	GOBP_FACE_DEVELOPMENT	1/189	20/5089	0.531569	0.840809	0.729751	Tiparp	1	GO BP	up	NP
GOBP_RESPONSE_TO_TUMOR_CELL	GOBP_RESPONSE_TO_TUMOR_CELL	GOBP_RESPONSE_TO_TUMOR_CELL	1/189	20/5089	0.531569	0.840809	0.729751	Ahr	1	GO BP	up	NP
GOBP_T_CELL_SELECTION	GOBP_T_CELL_SELECTION	GOBP_T_CELL_SELECTION	1/189	20/5089	0.531569	0.840809	0.729751	Ctsl	1	GO BP	up	NP
GOBP_CIRCADIAN_REGULATION_OF_GENE_EXPRESSION	GOBP_CIRCADIAN_REGULATION_OF_GENE_EXPRESSION	GOBP_CIRCADIAN_REGULATION_OF_GENE_EXPRESSION	2/189	48/5089	0.53751	0.846985	0.735111	Ahr/Npas2	2	GO BP	up	NP
GOBP_REGULATION_OF_EPIDERMIS_DEVELOPMENT	GOBP_REGULATION_OF_EPIDERMIS_DEVELOPMENT	GOBP_REGULATION_OF_EPIDERMIS_DEVELOPMENT	1/189	21/5089	0.549035	0.855425	0.742436	Zfp36l1	1	GO BP	up	NP
GOBP_STRIATED_MUSCLE_ADAPTATION	GOBP_STRIATED_MUSCLE_ADAPTATION	GOBP_STRIATED_MUSCLE_ADAPTATION	1/189	21/5089	0.549035	0.855425	0.742436	Pparg	1	GO BP	up	NP
GOBP_TRABECULA_MORPHOGENESIS	GOBP_TRABECULA_MORPHOGENESIS	GOBP_TRABECULA_MORPHOGENESIS	1/189	21/5089	0.549035	0.855425	0.742436	Ppargc1b	1	GO BP	up	NP
GOBP_RESPONSE_TO_RADIATION	GOBP_RESPONSE_TO_RADIATION	GOBP_RESPONSE_TO_RADIATION	7/189	189/5089	0.558848	0.867466	0.752887	Trp53inp1/Hamp/Blm/Cxcl12/Jund/Gtf2h5/Msh2	7	GO BP	up	NP
GOBP_OVULATION_CYCLE	GOBP_OVULATION_CYCLE	GOBP_OVULATION_CYCLE	1/189	22/5089	0.565853	0.871832	0.756676	Map2k6	1	GO BP	up	NP
GOBP_VIRAL_PROTEIN_PROCESSING	GOBP_VIRAL_PROTEIN_PROCESSING	GOBP_VIRAL_PROTEIN_PROCESSING	1/189	22/5089	0.565853	0.871832	0.756676	St6gal1	1	GO BP	up	NP
GOBP_ENDOPLASMIC_RETICULUM_UNFOLDED_PROTEIN_RESPONSE	GOBP_ENDOPLASMIC_RETICULUM_UNFOLDED_PROTEIN_RESPONSE	GOBP_ENDOPLASMIC_RETICULUM_UNFOLDED_PROTEIN_RESPONSE	2/189	51/5089	0.570645	0.8751	0.759513	Cth/Bcl2l11	2	GO BP	up	NP
GOBP_RESPONSE_TO_EXTRACELLULAR_STIMULUS	GOBP_RESPONSE_TO_EXTRACELLULAR_STIMULUS	GOBP_RESPONSE_TO_EXTRACELLULAR_STIMULUS	9/189	247/5089	0.573558	0.8751	0.759513	Apoe/Pon1/Cyp8b1/Hamp/Pfkfb1/Bche/Gdf15/Igfbp2/Pparg	9	GO BP	up	NP
GOBP_LEUKOCYTE_MIGRATION	GOBP_LEUKOCYTE_MIGRATION	GOBP_LEUKOCYTE_MIGRATION	5/189	136/5089	0.574284	0.8751	0.759513	Rarres2/Cxcl12/Ddt/Mospd2/Cd81	5	GO BP	up	NP
GOBP_VESICLE_BUDDING_FROM_MEMBRANE	GOBP_VESICLE_BUDDING_FROM_MEMBRANE	GOBP_VESICLE_BUDDING_FROM_MEMBRANE	2/189	52/5089	0.581304	0.877287	0.761411	Insig1/S100a10	2	GO BP	up	NP
GOBP_CELL_REDOX_HOMEOSTASIS	GOBP_CELL_REDOX_HOMEOSTASIS	GOBP_CELL_REDOX_HOMEOSTASIS	1/189	23/5089	0.582046	0.877287	0.761411	Prdx5	1	GO BP	up	NP
GOBP_EMBRYO_IMPLANTATION	GOBP_EMBRYO_IMPLANTATION	GOBP_EMBRYO_IMPLANTATION	1/189	23/5089	0.582046	0.877287	0.761411	H3f3b	1	GO BP	up	NP
GOBP_ERYTHROCYTE_HOMEOSTASIS	GOBP_ERYTHROCYTE_HOMEOSTASIS	GOBP_ERYTHROCYTE_HOMEOSTASIS	3/189	81/5089	0.584698	0.878103	0.762119	Zfp36l1/Cited2/Thra	3	GO BP	up	NP
GOBP_ANTIGEN_PROCESSING_AND_PRESENTATION_OF_EXOGENOUS_ANTIGEN	GOBP_ANTIGEN_PROCESSING_AND_PRESENTATION_OF_EXOGENOUS_ANTIGEN	GOBP_ANTIGEN_PROCESSING_AND_PRESENTATION_OF_EXOGENOUS_ANTIGEN	1/189	24/5089	0.597639	0.883203	0.766545	Ctsl	1	GO BP	up	NP
GOBP_HYDROGEN_PEROXIDE_METABOLIC_PROCESS	GOBP_HYDROGEN_PEROXIDE_METABOLIC_PROCESS	GOBP_HYDROGEN_PEROXIDE_METABOLIC_PROCESS	1/189	24/5089	0.597639	0.883203	0.766545	Prdx5	1	GO BP	up	NP
GOBP_RESPONSE_TO_COLD	GOBP_RESPONSE_TO_COLD	GOBP_RESPONSE_TO_COLD	1/189	24/5089	0.597639	0.883203	0.766545	Thra	1	GO BP	up	NP
GOBP_RESPONSE_TO_ISCHEMIA	GOBP_RESPONSE_TO_ISCHEMIA	GOBP_RESPONSE_TO_ISCHEMIA	1/189	24/5089	0.597639	0.883203	0.766545	Map2k6	1	GO BP	up	NP
GOBP_VESICLE_MEDIATED_TRANSPORT_IN_SYNAPSE	GOBP_VESICLE_MEDIATED_TRANSPORT_IN_SYNAPSE	GOBP_VESICLE_MEDIATED_TRANSPORT_IN_SYNAPSE	3/189	84/5089	0.609611	0.883203	0.766545	Slc17a8/Adra1a/Btbd8	3	GO BP	up	NP
GOBP_MEIOTIC_CELL_CYCLE_PROCESS	GOBP_MEIOTIC_CELL_CYCLE_PROCESS	GOBP_MEIOTIC_CELL_CYCLE_PROCESS	2/189	55/5089	0.612113	0.883203	0.766545	Rad51b/Bcl2l11	2	GO BP	up	NP
GOBP_PROTEIN_DEMETHYLATION	GOBP_PROTEIN_DEMETHYLATION	GOBP_PROTEIN_DEMETHYLATION	1/189	25/5089	0.612653	0.883203	0.766545	Kdm2b	1	GO BP	up	NP
GOBP_RECEPTOR_LOCALIZATION_TO_SYNAPSE	GOBP_RECEPTOR_LOCALIZATION_TO_SYNAPSE	GOBP_RECEPTOR_LOCALIZATION_TO_SYNAPSE	1/189	25/5089	0.612653	0.883203	0.766545	Reln	1	GO BP	up	NP
GOBP_SPINDLE_LOCALIZATION	GOBP_SPINDLE_LOCALIZATION	GOBP_SPINDLE_LOCALIZATION	1/189	25/5089	0.612653	0.883203	0.766545	Nde1	1	GO BP	up	NP
GOBP_BIOLOGICAL_PROCESS_INVOLVED_IN_SYMBIOTIC_INTERACTION	GOBP_BIOLOGICAL_PROCESS_INVOLVED_IN_SYMBIOTIC_INTERACTION	GOBP_BIOLOGICAL_PROCESS_INVOLVED_IN_SYMBIOTIC_INTERACTION	5/189	142/5089	0.613092	0.883203	0.766545	Ctsl/Apoe/Pcx/Jun/Cd81	5	GO BP	up	NP
GOBP_RESPONSE_TO_TEMPERATURE_STIMULUS	GOBP_RESPONSE_TO_TEMPERATURE_STIMULUS	GOBP_RESPONSE_TO_TEMPERATURE_STIMULUS	3/189	85/5089	0.617692	0.883203	0.766545	Trp53inp1/Cxcl12/Thra	3	GO BP	up	NP
GOBP_APPENDAGE_MORPHOGENESIS	GOBP_APPENDAGE_MORPHOGENESIS	GOBP_APPENDAGE_MORPHOGENESIS	2/189	56/5089	0.621993	0.883203	0.766545	Plxna2/Bcl2l11	2	GO BP	up	NP
GOBP_DEVELOPMENTAL_GROWTH_INVOLVED_IN_MORPHOGENESIS	GOBP_DEVELOPMENTAL_GROWTH_INVOLVED_IN_MORPHOGENESIS	GOBP_DEVELOPMENTAL_GROWTH_INVOLVED_IN_MORPHOGENESIS	4/189	115/5089	0.624578	0.883203	0.766545	Apoe/Cxcl12/Nrp2/Rtn4	4	GO BP	up	NP
GOBP_STEM_CELL_PROLIFERATION	GOBP_STEM_CELL_PROLIFERATION	GOBP_STEM_CELL_PROLIFERATION	1/189	26/5089	0.62711	0.883203	0.766545	Zfp36l1	1	GO BP	up	NP
GOBP_TISSUE_MORPHOGENESIS	GOBP_TISSUE_MORPHOGENESIS	GOBP_TISSUE_MORPHOGENESIS	9/189	261/5089	0.640749	0.883203	0.766545	Dlc1/Robo1/Agt/Nrp2/Kdm2b/Prickle1/Smad7/Foxq1/Cited2	9	GO BP	up	NP
GOBP_CELLULAR_EXTRAVASATION	GOBP_CELLULAR_EXTRAVASATION	GOBP_CELLULAR_EXTRAVASATION	1/189	27/5089	0.64103	0.883203	0.766545	Cxcl12	1	GO BP	up	NP
GOBP_CRANIAL_SKELETAL_SYSTEM_DEVELOPMENT	GOBP_CRANIAL_SKELETAL_SYSTEM_DEVELOPMENT	GOBP_CRANIAL_SKELETAL_SYSTEM_DEVELOPMENT	1/189	27/5089	0.64103	0.883203	0.766545	Insig1	1	GO BP	up	NP
GOBP_DEVELOPMENTAL_PIGMENTATION	GOBP_DEVELOPMENTAL_PIGMENTATION	GOBP_DEVELOPMENTAL_PIGMENTATION	1/189	27/5089	0.64103	0.883203	0.766545	Bcl2l11	1	GO BP	up	NP
GOBP_EMBRYONIC_PATTERN_SPECIFICATION	GOBP_EMBRYONIC_PATTERN_SPECIFICATION	GOBP_EMBRYONIC_PATTERN_SPECIFICATION	1/189	27/5089	0.64103	0.883203	0.766545	Nrp2	1	GO BP	up	NP
GOBP_HEART_VALVE_MORPHOGENESIS	GOBP_HEART_VALVE_MORPHOGENESIS	GOBP_HEART_VALVE_MORPHOGENESIS	1/189	27/5089	0.64103	0.883203	0.766545	Robo1	1	GO BP	up	NP
GOBP_INFLAMMATORY_RESPONSE_TO_ANTIGENIC_STIMULUS	GOBP_INFLAMMATORY_RESPONSE_TO_ANTIGENIC_STIMULUS	GOBP_INFLAMMATORY_RESPONSE_TO_ANTIGENIC_STIMULUS	1/189	27/5089	0.64103	0.883203	0.766545	Cd81	1	GO BP	up	NP
GOBP_INTERLEUKIN_12_PRODUCTION	GOBP_INTERLEUKIN_12_PRODUCTION	GOBP_INTERLEUKIN_12_PRODUCTION	1/189	27/5089	0.64103	0.883203	0.766545	Cd36	1	GO BP	up	NP
GOBP_REGULATION_OF_MEMBRANE_LIPID_DISTRIBUTION	GOBP_REGULATION_OF_MEMBRANE_LIPID_DISTRIBUTION	GOBP_REGULATION_OF_MEMBRANE_LIPID_DISTRIBUTION	1/189	27/5089	0.64103	0.883203	0.766545	Plscr2	1	GO BP	up	NP
GOBP_SIGNAL_TRANSDUCTION_IN_ABSENCE_OF_LIGAND	GOBP_SIGNAL_TRANSDUCTION_IN_ABSENCE_OF_LIGAND	GOBP_SIGNAL_TRANSDUCTION_IN_ABSENCE_OF_LIGAND	1/189	27/5089	0.64103	0.883203	0.766545	Bcl2l11	1	GO BP	up	NP
GOBP_ACTIN_FILAMENT_BASED_MOVEMENT	GOBP_ACTIN_FILAMENT_BASED_MOVEMENT	GOBP_ACTIN_FILAMENT_BASED_MOVEMENT	2/189	58/5089	0.641171	0.883203	0.766545	Wipf3/Gpd1l	2	GO BP	up	NP
GOBP_EMBRYONIC_MORPHOGENESIS	GOBP_EMBRYONIC_MORPHOGENESIS	GOBP_EMBRYONIC_MORPHOGENESIS	8/189	234/5089	0.647601	0.886788	0.769657	Dlc1/Insig1/Zfp36l1/Kdm2b/Prickle1/Atoh8/Cited2/Bcl2l11	8	GO BP	up	NP
GOBP_CELL_KILLING	GOBP_CELL_KILLING	GOBP_CELL_KILLING	2/189	59/5089	0.650471	0.886788	0.769657	Hamp/Il18	2	GO BP	up	NP
GOBP_DETECTION_OF_ABIOTIC_STIMULUS	GOBP_DETECTION_OF_ABIOTIC_STIMULUS	GOBP_DETECTION_OF_ABIOTIC_STIMULUS	1/189	28/5089	0.654433	0.886788	0.769657	Cxcl12	1	GO BP	up	NP
GOBP_NEPHRON_MORPHOGENESIS	GOBP_NEPHRON_MORPHOGENESIS	GOBP_NEPHRON_MORPHOGENESIS	1/189	28/5089	0.654433	0.886788	0.769657	Agt	1	GO BP	up	NP
GOBP_NEURAL_NUCLEUS_DEVELOPMENT	GOBP_NEURAL_NUCLEUS_DEVELOPMENT	GOBP_NEURAL_NUCLEUS_DEVELOPMENT	1/189	28/5089	0.654433	0.886788	0.769657	Nfib	1	GO BP	up	NP
GOBP_RESPONSE_TO_HEAT	GOBP_RESPONSE_TO_HEAT	GOBP_RESPONSE_TO_HEAT	2/189	60/5089	0.65958	0.890861	0.773192	Trp53inp1/Cxcl12	2	GO BP	up	NP
GOBP_EXOCYTOSIS	GOBP_EXOCYTOSIS	GOBP_EXOCYTOSIS	5/189	152/5089	0.673011	0.900578	0.781625	Fgg/Fgb/Fga/Adra1a/Rab11fip2	5	GO BP	up	NP
GOBP_OLEFINIC_COMPOUND_METABOLIC_PROCESS	GOBP_OLEFINIC_COMPOUND_METABOLIC_PROCESS	GOBP_OLEFINIC_COMPOUND_METABOLIC_PROCESS	2/189	62/5089	0.677229	0.900578	0.781625	Cyp3a11/Cyp2a5	2	GO BP	up	NP
GOBP_HOMEOSTASIS_OF_NUMBER_OF_CELLS	GOBP_HOMEOSTASIS_OF_NUMBER_OF_CELLS	GOBP_HOMEOSTASIS_OF_NUMBER_OF_CELLS	5/189	153/5089	0.678657	0.900578	0.781625	Hamp/Zfp36l1/Cited2/Bcl2l11/Thra	5	GO BP	up	NP
GOBP_ANTIGEN_PROCESSING_AND_PRESENTATION_OF_PEPTIDE_ANTIGEN	GOBP_ANTIGEN_PROCESSING_AND_PRESENTATION_OF_PEPTIDE_ANTIGEN	GOBP_ANTIGEN_PROCESSING_AND_PRESENTATION_OF_PEPTIDE_ANTIGEN	1/189	30/5089	0.679763	0.900578	0.781625	Ctsl	1	GO BP	up	NP
GOBP_REACTIVE_OXYGEN_SPECIES_BIOSYNTHETIC_PROCESS	GOBP_REACTIVE_OXYGEN_SPECIES_BIOSYNTHETIC_PROCESS	GOBP_REACTIVE_OXYGEN_SPECIES_BIOSYNTHETIC_PROCESS	1/189	30/5089	0.679763	0.900578	0.781625	Cd36	1	GO BP	up	NP
GOBP_VIRAL_TRANSCRIPTION	GOBP_VIRAL_TRANSCRIPTION	GOBP_VIRAL_TRANSCRIPTION	1/189	30/5089	0.679763	0.900578	0.781625	Jun	1	GO BP	up	NP
GOBP_BIOLOGICAL_PROCESS_INVOLVED_IN_INTERACTION_WITH_HOST	GOBP_BIOLOGICAL_PROCESS_INVOLVED_IN_INTERACTION_WITH_HOST	GOBP_BIOLOGICAL_PROCESS_INVOLVED_IN_INTERACTION_WITH_HOST	3/189	95/5089	0.692222	0.913791	0.793093	Ctsl/Pcx/Cd81	3	GO BP	up	NP
GOBP_CELL_MATURATION	GOBP_CELL_MATURATION	GOBP_CELL_MATURATION	2/189	64/5089	0.69413	0.913791	0.793093	Fgg/Pparg	2	GO BP	up	NP
GOBP_REGULATION_OF_BINDING	GOBP_REGULATION_OF_BINDING	GOBP_REGULATION_OF_BINDING	6/189	186/5089	0.69674	0.91422	0.793465	Apoe/Pon1/Jun/S100a10/Pparg/Tmsb4x	6	GO BP	up	NP
GOBP_VIRAL_GENE_EXPRESSION	GOBP_VIRAL_GENE_EXPRESSION	GOBP_VIRAL_GENE_EXPRESSION	2/189	65/5089	0.702304	0.91422	0.793465	St6gal1/Jun	2	GO BP	up	NP
GOBP_AXIS_SPECIFICATION	GOBP_AXIS_SPECIFICATION	GOBP_AXIS_SPECIFICATION	1/189	32/5089	0.703246	0.91422	0.793465	Cited2	1	GO BP	up	NP
GOBP_CHEMOKINE_PRODUCTION	GOBP_CHEMOKINE_PRODUCTION	GOBP_CHEMOKINE_PRODUCTION	1/189	32/5089	0.703246	0.91422	0.793465	Il18	1	GO BP	up	NP
GOBP_LEUKOCYTE_MEDIATED_IMMUNITY	GOBP_LEUKOCYTE_MEDIATED_IMMUNITY	GOBP_LEUKOCYTE_MEDIATED_IMMUNITY	5/189	159/5089	0.711168	0.914884	0.794041	Ahr/Smad7/Cd81/Il18/Msh2	5	GO BP	up	NP
GOBP_HEART_VALVE_DEVELOPMENT	GOBP_HEART_VALVE_DEVELOPMENT	GOBP_HEART_VALVE_DEVELOPMENT	1/189	33/5089	0.714337	0.914884	0.794041	Robo1	1	GO BP	up	NP
GOBP_REGULATION_OF_HEMOPOIESIS	GOBP_REGULATION_OF_HEMOPOIESIS	GOBP_REGULATION_OF_HEMOPOIESIS	5/189	161/5089	0.721482	0.914884	0.794041	Zfp36l1/Ppargc1b/Smad7/Il18/Tmem176b	5	GO BP	up	NP
GOBP_EXECUTION_PHASE_OF_APOPTOSIS	GOBP_EXECUTION_PHASE_OF_APOPTOSIS	GOBP_EXECUTION_PHASE_OF_APOPTOSIS	1/189	34/5089	0.725015	0.914884	0.794041	Dlc1	1	GO BP	up	NP
GOBP_INTERFERON_GAMMA_PRODUCTION	GOBP_INTERFERON_GAMMA_PRODUCTION	GOBP_INTERFERON_GAMMA_PRODUCTION	1/189	34/5089	0.725015	0.914884	0.794041	Il18	1	GO BP	up	NP
GOBP_LYMPHOCYTE_HOMEOSTASIS	GOBP_LYMPHOCYTE_HOMEOSTASIS	GOBP_LYMPHOCYTE_HOMEOSTASIS	1/189	34/5089	0.725015	0.914884	0.794041	Bcl2l11	1	GO BP	up	NP
GOBP_REGULATION_OF_MEMBRANE_PERMEABILITY	GOBP_REGULATION_OF_MEMBRANE_PERMEABILITY	GOBP_REGULATION_OF_MEMBRANE_PERMEABILITY	1/189	34/5089	0.725015	0.914884	0.794041	Bcl2l11	1	GO BP	up	NP
GOBP_RESPONSE_TO_ACTIVITY	GOBP_RESPONSE_TO_ACTIVITY	GOBP_RESPONSE_TO_ACTIVITY	1/189	34/5089	0.725015	0.914884	0.794041	Agt	1	GO BP	up	NP
GOBP_MITOCHONDRIAL_TRANSMEMBRANE_TRANSPORT	GOBP_MITOCHONDRIAL_TRANSMEMBRANE_TRANSPORT	GOBP_MITOCHONDRIAL_TRANSMEMBRANE_TRANSPORT	2/189	68/5089	0.725749	0.914884	0.794041	Mpc1/Psen2	2	GO BP	up	NP
GOBP_TUMOR_NECROSIS_FACTOR_SUPERFAMILY_CYTOKINE_PRODUCTION	GOBP_TUMOR_NECROSIS_FACTOR_SUPERFAMILY_CYTOKINE_PRODUCTION	GOBP_TUMOR_NECROSIS_FACTOR_SUPERFAMILY_CYTOKINE_PRODUCTION	2/189	68/5089	0.725749	0.914884	0.794041	Cd36/Ddt	2	GO BP	up	NP
GOBP_APPENDAGE_DEVELOPMENT	GOBP_APPENDAGE_DEVELOPMENT	GOBP_APPENDAGE_DEVELOPMENT	2/189	69/5089	0.733211	0.916417	0.795372	Plxna2/Bcl2l11	2	GO BP	up	NP
GOBP_REGULATION_OF_PROTEIN_STABILITY	GOBP_REGULATION_OF_PROTEIN_STABILITY	GOBP_REGULATION_OF_PROTEIN_STABILITY	6/189	194/5089	0.734839	0.916417	0.795372	Apoa2/Trf/Smad7/Rtn4/Cd81/Cmtm6	6	GO BP	up	NP
GOBP_ANATOMICAL_STRUCTURE_HOMEOSTASIS	GOBP_ANATOMICAL_STRUCTURE_HOMEOSTASIS	GOBP_ANATOMICAL_STRUCTURE_HOMEOSTASIS	4/189	133/5089	0.735309	0.916417	0.795372	Trf/Hamp/Serpina3n/Ppargc1b	4	GO BP	up	NP
GOBP_IMMUNE_EFFECTOR_PROCESS	GOBP_IMMUNE_EFFECTOR_PROCESS	GOBP_IMMUNE_EFFECTOR_PROCESS	8/189	254/5089	0.735777	0.916417	0.795372	Apoa2/Ahr/Cd36/Sucnr1/Smad7/Cd81/Il18/Msh2	8	GO BP	up	NP
GOBP_ESTABLISHMENT_OF_TISSUE_POLARITY	GOBP_ESTABLISHMENT_OF_TISSUE_POLARITY	GOBP_ESTABLISHMENT_OF_TISSUE_POLARITY	1/189	36/5089	0.745196	0.918449	0.797135	Prickle1	1	GO BP	up	NP
GOBP_REGULATION_OF_ATP_DEPENDENT_ACTIVITY	GOBP_REGULATION_OF_ATP_DEPENDENT_ACTIVITY	GOBP_REGULATION_OF_ATP_DEPENDENT_ACTIVITY	1/189	36/5089	0.745196	0.918449	0.797135	Msh2	1	GO BP	up	NP
GOBP_HORMONE_MEDIATED_SIGNALING_PATHWAY	GOBP_HORMONE_MEDIATED_SIGNALING_PATHWAY	GOBP_HORMONE_MEDIATED_SIGNALING_PATHWAY	3/189	104/5089	0.749536	0.918449	0.797135	Ppargc1b/Pparg/Thra	3	GO BP	up	NP
GOBP_REGULATION_OF_RESPONSE_TO_BIOTIC_STIMULUS	GOBP_REGULATION_OF_RESPONSE_TO_BIOTIC_STIMULUS	GOBP_REGULATION_OF_RESPONSE_TO_BIOTIC_STIMULUS	5/189	167/5089	0.75085	0.918449	0.797135	Apoe/Rnf125/Ahr/Cd36/Pparg	5	GO BP	up	NP
GOBP_CHROMOSOME_LOCALIZATION	GOBP_CHROMOSOME_LOCALIZATION	GOBP_CHROMOSOME_LOCALIZATION	1/189	37/5089	0.754726	0.918449	0.797135	Nde1	1	GO BP	up	NP
GOBP_INTERLEUKIN_1_PRODUCTION	GOBP_INTERLEUKIN_1_PRODUCTION	GOBP_INTERLEUKIN_1_PRODUCTION	1/189	37/5089	0.754726	0.918449	0.797135	Cd36	1	GO BP	up	NP
GOBP_SOMATIC_DIVERSIFICATION_OF_IMMUNOGLOBULINS	GOBP_SOMATIC_DIVERSIFICATION_OF_IMMUNOGLOBULINS	GOBP_SOMATIC_DIVERSIFICATION_OF_IMMUNOGLOBULINS	1/189	37/5089	0.754726	0.918449	0.797135	Msh2	1	GO BP	up	NP
GOBP_REACTIVE_OXYGEN_SPECIES_METABOLIC_PROCESS	GOBP_REACTIVE_OXYGEN_SPECIES_METABOLIC_PROCESS	GOBP_REACTIVE_OXYGEN_SPECIES_METABOLIC_PROCESS	3/189	105/5089	0.755348	0.918449	0.797135	Agt/Cd36/Prdx5	3	GO BP	up	NP
GOBP_IMMUNE_RESPONSE_REGULATING_SIGNALING_PATHWAY	GOBP_IMMUNE_RESPONSE_REGULATING_SIGNALING_PATHWAY	GOBP_IMMUNE_RESPONSE_REGULATING_SIGNALING_PATHWAY	6/189	200/5089	0.761128	0.918449	0.797135	Rnf125/Map2k6/Cd36/Rtn4/Cd81/Rab11fip2	6	GO BP	up	NP
GOBP_MIDBRAIN_DEVELOPMENT	GOBP_MIDBRAIN_DEVELOPMENT	GOBP_MIDBRAIN_DEVELOPMENT	1/189	38/5089	0.763902	0.918449	0.797135	Kdm2b	1	GO BP	up	NP
GOBP_MOLTING_CYCLE	GOBP_MOLTING_CYCLE	GOBP_MOLTING_CYCLE	1/189	38/5089	0.763902	0.918449	0.797135	Foxq1	1	GO BP	up	NP
GOBP_SINGLE_FERTILIZATION	GOBP_SINGLE_FERTILIZATION	GOBP_SINGLE_FERTILIZATION	1/189	38/5089	0.763902	0.918449	0.797135	H3f3b	1	GO BP	up	NP
GOBP_PROTEIN_CONTAINING_COMPLEX_LOCALIZATION	GOBP_PROTEIN_CONTAINING_COMPLEX_LOCALIZATION	GOBP_PROTEIN_CONTAINING_COMPLEX_LOCALIZATION	2/189	74/5089	0.767988	0.9207	0.79909	Smad7/Reln	2	GO BP	up	NP
GOBP_DEVELOPMENTAL_MATURATION	GOBP_DEVELOPMENTAL_MATURATION	GOBP_DEVELOPMENTAL_MATURATION	3/189	110/5089	0.782805	0.935622	0.81204	Fgg/Pparg/Reln	3	GO BP	up	NP
GOBP_MAINTENANCE_OF_CELL_NUMBER	GOBP_MAINTENANCE_OF_CELL_NUMBER	GOBP_MAINTENANCE_OF_CELL_NUMBER	2/189	77/5089	0.786918	0.935622	0.81204	Tpt1/Kdm2b	2	GO BP	up	NP
GOBP_REGULATION_OF_VESICLE_MEDIATED_TRANSPORT	GOBP_REGULATION_OF_VESICLE_MEDIATED_TRANSPORT	GOBP_REGULATION_OF_VESICLE_MEDIATED_TRANSPORT	8/189	268/5089	0.787882	0.935622	0.81204	Apoa2/Fgg/Fgb/Apoe/Trf/Fga/Cd36/Adra1a	8	GO BP	up	NP
GOBP_CENTROSOME_DUPLICATION	GOBP_CENTROSOME_DUPLICATION	GOBP_CENTROSOME_DUPLICATION	1/189	41/5089	0.789431	0.935622	0.81204	Nde1	1	GO BP	up	NP
GOBP_MEIOTIC_CELL_CYCLE	GOBP_MEIOTIC_CELL_CYCLE	GOBP_MEIOTIC_CELL_CYCLE	2/189	78/5089	0.79292	0.937088	0.813313	Rad51b/Bcl2l11	2	GO BP	up	NP
GOBP_SOMATIC_DIVERSIFICATION_OF_IMMUNE_RECEPTORS	GOBP_SOMATIC_DIVERSIFICATION_OF_IMMUNE_RECEPTORS	GOBP_SOMATIC_DIVERSIFICATION_OF_IMMUNE_RECEPTORS	1/189	43/5089	0.804905	0.945877	0.820941	Msh2	1	GO BP	up	NP
GOBP_SPERMATID_DIFFERENTIATION	GOBP_SPERMATID_DIFFERENTIATION	GOBP_SPERMATID_DIFFERENTIATION	1/189	43/5089	0.804905	0.945877	0.820941	H3f3b	1	GO BP	up	NP
GOBP_CELL_FATE_COMMITMENT	GOBP_CELL_FATE_COMMITMENT	GOBP_CELL_FATE_COMMITMENT	2/189	81/5089	0.810046	0.946443	0.821432	Ctsl/Pparg	2	GO BP	up	NP
GOBP_CHAPERONE_MEDIATED_PROTEIN_FOLDING	GOBP_CHAPERONE_MEDIATED_PROTEIN_FOLDING	GOBP_CHAPERONE_MEDIATED_PROTEIN_FOLDING	1/189	44/5089	0.812212	0.946443	0.821432	Fkbp5	1	GO BP	up	NP
GOBP_REGULATION_OF_REPRODUCTIVE_PROCESS	GOBP_REGULATION_OF_REPRODUCTIVE_PROCESS	GOBP_REGULATION_OF_REPRODUCTIVE_PROCESS	1/189	44/5089	0.812212	0.946443	0.821432	Cited2	1	GO BP	up	NP
GOBP_MORPHOGENESIS_OF_A_BRANCHING_STRUCTURE	GOBP_MORPHOGENESIS_OF_A_BRANCHING_STRUCTURE	GOBP_MORPHOGENESIS_OF_A_BRANCHING_STRUCTURE	2/189	82/5089	0.81547	0.946686	0.821643	Agt/Rtn4	2	GO BP	up	NP
GOBP_LEUKOCYTE_HOMEOSTASIS	GOBP_LEUKOCYTE_HOMEOSTASIS	GOBP_LEUKOCYTE_HOMEOSTASIS	1/189	45/5089	0.819247	0.946686	0.821643	Bcl2l11	1	GO BP	up	NP
GOBP_LEUKOCYTE_MEDIATED_CYTOTOXICITY	GOBP_LEUKOCYTE_MEDIATED_CYTOTOXICITY	GOBP_LEUKOCYTE_MEDIATED_CYTOTOXICITY	1/189	45/5089	0.819247	0.946686	0.821643	Il18	1	GO BP	up	NP
GOBP_GERM_CELL_DEVELOPMENT	GOBP_GERM_CELL_DEVELOPMENT	GOBP_GERM_CELL_DEVELOPMENT	2/189	84/5089	0.825905	0.949899	0.824432	H3f3b/Msh2	2	GO BP	up	NP
GOBP_SEQUESTERING_OF_CALCIUM_ION	GOBP_SEQUESTERING_OF_CALCIUM_ION	GOBP_SEQUESTERING_OF_CALCIUM_ION	1/189	47/5089	0.83254	0.949899	0.824432	Rasa3	1	GO BP	up	NP
GOBP_REGULATION_OF_RESPONSE_TO_CYTOKINE_STIMULUS	GOBP_REGULATION_OF_RESPONSE_TO_CYTOKINE_STIMULUS	GOBP_REGULATION_OF_RESPONSE_TO_CYTOKINE_STIMULUS	2/189	86/5089	0.835809	0.949899	0.824432	Robo1/Pparg	2	GO BP	up	NP
GOBP_FEMALE_SEX_DIFFERENTIATION	GOBP_FEMALE_SEX_DIFFERENTIATION	GOBP_FEMALE_SEX_DIFFERENTIATION	1/189	48/5089	0.838818	0.949899	0.824432	Tiparp	1	GO BP	up	NP
GOBP_SPECIFICATION_OF_SYMMETRY	GOBP_SPECIFICATION_OF_SYMMETRY	GOBP_SPECIFICATION_OF_SYMMETRY	1/189	48/5089	0.838818	0.949899	0.824432	Cited2	1	GO BP	up	NP
GOBP_FORMATION_OF_PRIMARY_GERM_LAYER	GOBP_FORMATION_OF_PRIMARY_GERM_LAYER	GOBP_FORMATION_OF_PRIMARY_GERM_LAYER	1/189	49/5089	0.844861	0.949899	0.824432	Atoh8	1	GO BP	up	NP
GOBP_PIGMENTATION	GOBP_PIGMENTATION	GOBP_PIGMENTATION	1/189	49/5089	0.844861	0.949899	0.824432	Bcl2l11	1	GO BP	up	NP
GOBP_VESICLE_MEDIATED_TRANSPORT_TO_THE_PLASMA_MEMBRANE	GOBP_VESICLE_MEDIATED_TRANSPORT_TO_THE_PLASMA_MEMBRANE	GOBP_VESICLE_MEDIATED_TRANSPORT_TO_THE_PLASMA_MEMBRANE	2/189	88/5089	0.845204	0.949899	0.824432	Ank3/Cmtm6	2	GO BP	up	NP
GOBP_INORGANIC_ION_TRANSMEMBRANE_TRANSPORT	GOBP_INORGANIC_ION_TRANSMEMBRANE_TRANSPORT	GOBP_INORGANIC_ION_TRANSMEMBRANE_TRANSPORT	8/189	288/5089	0.84869	0.949899	0.824432	Slc17a4/Hamp/Psen2/Ank3/Pm20d1/Rasa3/Gpd1l/Tmsb4x	8	GO BP	up	NP
GOBP_ESTABLISHMENT_OF_CELL_POLARITY	GOBP_ESTABLISHMENT_OF_CELL_POLARITY	GOBP_ESTABLISHMENT_OF_CELL_POLARITY	2/189	89/5089	0.849717	0.949899	0.824432	Rab11fip2/Nde1	2	GO BP	up	NP
GOBP_MEMBRANE_DOCKING	GOBP_MEMBRANE_DOCKING	GOBP_MEMBRANE_DOCKING	1/189	50/5089	0.850679	0.949899	0.824432	Psen2	1	GO BP	up	NP
GOBP_ANATOMICAL_STRUCTURE_MATURATION	GOBP_ANATOMICAL_STRUCTURE_MATURATION	GOBP_ANATOMICAL_STRUCTURE_MATURATION	2/189	90/5089	0.854111	0.949899	0.824432	Fgg/Pparg	2	GO BP	up	NP
GOBP_REGULATION_OF_CELL_SHAPE	GOBP_REGULATION_OF_CELL_SHAPE	GOBP_REGULATION_OF_CELL_SHAPE	2/189	90/5089	0.854111	0.949899	0.824432	Dlc1/Plxna2	2	GO BP	up	NP
GOBP_ANTIGEN_PROCESSING_AND_PRESENTATION	GOBP_ANTIGEN_PROCESSING_AND_PRESENTATION	GOBP_ANTIGEN_PROCESSING_AND_PRESENTATION	1/189	51/5089	0.856279	0.949899	0.824432	Ctsl	1	GO BP	up	NP
GOBP_CELLULAR_SENESCENCE	GOBP_CELLULAR_SENESCENCE	GOBP_CELLULAR_SENESCENCE	1/189	51/5089	0.856279	0.949899	0.824432	Map2k6	1	GO BP	up	NP
GOBP_REGULATION_OF_OSSIFICATION	GOBP_REGULATION_OF_OSSIFICATION	GOBP_REGULATION_OF_OSSIFICATION	1/189	52/5089	0.861671	0.950809	0.825222	Smad7	1	GO BP	up	NP
GOBP_RETINA_DEVELOPMENT_IN_CAMERA_TYPE_EYE	GOBP_RETINA_DEVELOPMENT_IN_CAMERA_TYPE_EYE	GOBP_RETINA_DEVELOPMENT_IN_CAMERA_TYPE_EYE	1/189	52/5089	0.861671	0.950809	0.825222	Slc17a8	1	GO BP	up	NP
GOBP_CARBOHYDRATE_TRANSMEMBRANE_TRANSPORT	GOBP_CARBOHYDRATE_TRANSMEMBRANE_TRANSPORT	GOBP_CARBOHYDRATE_TRANSMEMBRANE_TRANSPORT	1/189	53/5089	0.866861	0.951489	0.825811	Irs2	1	GO BP	up	NP
GOBP_TYPE_I_INTERFERON_PRODUCTION	GOBP_TYPE_I_INTERFERON_PRODUCTION	GOBP_TYPE_I_INTERFERON_PRODUCTION	1/189	53/5089	0.866861	0.951489	0.825811	Rnf125	1	GO BP	up	NP
GOBP_FERTILIZATION	GOBP_FERTILIZATION	GOBP_FERTILIZATION	1/189	54/5089	0.871858	0.954455	0.828386	H3f3b	1	GO BP	up	NP
GOBP_REGULATION_OF_ACTIN_FILAMENT_BASED_PROCESS	GOBP_REGULATION_OF_ACTIN_FILAMENT_BASED_PROCESS	GOBP_REGULATION_OF_ACTIN_FILAMENT_BASED_PROCESS	5/189	202/5089	0.877921	0.958343	0.831761	Dlc1/Cxcl12/Dixdc1/S100a10/Tmsb4x	5	GO BP	up	NP
GOBP_DETECTION_OF_STIMULUS	GOBP_DETECTION_OF_STIMULUS	GOBP_DETECTION_OF_STIMULUS	1/189	56/5089	0.881299	0.958343	0.831761	Cxcl12	1	GO BP	up	NP
GOBP_VIRAL_PROCESS	GOBP_VIRAL_PROCESS	GOBP_VIRAL_PROCESS	6/189	237/5089	0.882321	0.958343	0.831761	Ctsl/Apoe/Pcx/St6gal1/Jun/Cd81	6	GO BP	up	NP
GOBP_IMMUNOGLOBULIN_PRODUCTION	GOBP_IMMUNOGLOBULIN_PRODUCTION	GOBP_IMMUNOGLOBULIN_PRODUCTION	1/189	58/5089	0.890047	0.961713	0.834685	Msh2	1	GO BP	up	NP
GOBP_NEPHRON_DEVELOPMENT	GOBP_NEPHRON_DEVELOPMENT	GOBP_NEPHRON_DEVELOPMENT	1/189	58/5089	0.890047	0.961713	0.834685	Agt	1	GO BP	up	NP
GOBP_VIRAL_LIFE_CYCLE	GOBP_VIRAL_LIFE_CYCLE	GOBP_VIRAL_LIFE_CYCLE	4/189	176/5089	0.899179	0.969064	0.841065	Ctsl/Apoe/Pcx/Cd81	4	GO BP	up	NP
GOBP_RESPONSE_TO_VIRUS	GOBP_RESPONSE_TO_VIRUS	GOBP_RESPONSE_TO_VIRUS	4/189	177/5089	0.901597	0.969158	0.841147	Rnf125/Cxcl12/Tpt1/Nt5c3	4	GO BP	up	NP
GOBP_INTERLEUKIN_6_PRODUCTION	GOBP_INTERLEUKIN_6_PRODUCTION	GOBP_INTERLEUKIN_6_PRODUCTION	1/189	62/5089	0.905666	0.970354	0.842185	Cd36	1	GO BP	up	NP
GOBP_RESPONSE_TO_TOPOLOGICALLY_INCORRECT_PROTEIN	GOBP_RESPONSE_TO_TOPOLOGICALLY_INCORRECT_PROTEIN	GOBP_RESPONSE_TO_TOPOLOGICALLY_INCORRECT_PROTEIN	2/189	105/5089	0.907374	0.970354	0.842185	Cth/Bcl2l11	2	GO BP	up	NP
GOBP_CELL_CYCLE_PHASE_TRANSITION	GOBP_CELL_CYCLE_PHASE_TRANSITION	GOBP_CELL_CYCLE_PHASE_TRANSITION	6/189	255/5089	0.919531	0.980833	0.85128	Zfp36l1/Blm/Ccnd3/Fbxo31/Rad51b/Msh2	6	GO BP	up	NP
GOBP_REGULATION_OF_CIRCADIAN_RHYTHM	GOBP_REGULATION_OF_CIRCADIAN_RHYTHM	GOBP_REGULATION_OF_CIRCADIAN_RHYTHM	1/189	67/5089	0.922121	0.98108	0.851494	Pparg	1	GO BP	up	NP
GOBP_REGULATION_OF_CELL_DIVISION	GOBP_REGULATION_OF_CELL_DIVISION	GOBP_REGULATION_OF_CELL_DIVISION	1/189	69/5089	0.927873	0.983584	0.853667	Blm	1	GO BP	up	NP
GOBP_CELLULAR_PROCESS_INVOLVED_IN_REPRODUCTION_IN_MULTICELLULAR_ORGANISM	GOBP_CELLULAR_PROCESS_INVOLVED_IN_REPRODUCTION_IN_MULTICELLULAR_ORGANISM	GOBP_CELLULAR_PROCESS_INVOLVED_IN_REPRODUCTION_IN_MULTICELLULAR_ORGANISM	2/189	116/5089	0.934256	0.983584	0.853667	H3f3b/Msh2	2	GO BP	up	NP
GOBP_CYTOKINESIS	GOBP_CYTOKINESIS	GOBP_CYTOKINESIS	1/189	72/5089	0.935718	0.983584	0.853667	Ank3	1	GO BP	up	NP
GOBP_RESPONSE_TO_ACID_CHEMICAL	GOBP_RESPONSE_TO_ACID_CHEMICAL	GOBP_RESPONSE_TO_ACID_CHEMICAL	1/189	72/5089	0.935718	0.983584	0.853667	Cdo1	1	GO BP	up	NP
GOBP_MICROTUBULE_BASED_MOVEMENT	GOBP_MICROTUBULE_BASED_MOVEMENT	GOBP_MICROTUBULE_BASED_MOVEMENT	2/189	117/5089	0.936296	0.983584	0.853667	Pltp/Nde1	2	GO BP	up	NP
GOBP_MICROTUBULE_ORGANIZING_CENTER_ORGANIZATION	GOBP_MICROTUBULE_ORGANIZING_CENTER_ORGANIZATION	GOBP_MICROTUBULE_ORGANIZING_CENTER_ORGANIZATION	1/189	74/5089	0.940471	0.985481	0.855314	Nde1	1	GO BP	up	NP
GOBP_RESPONSE_TO_STARVATION	GOBP_RESPONSE_TO_STARVATION	GOBP_RESPONSE_TO_STARVATION	2/189	123/5089	0.947336	0.99018	0.859392	Hamp/Pfkfb1	2	GO BP	up	NP
GOBP_TRANSLATIONAL_INITIATION	GOBP_TRANSLATIONAL_INITIATION	GOBP_TRANSLATIONAL_INITIATION	1/189	83/5089	0.957883	0.996021	0.864462	Eif1	1	GO BP	up	NP
GOBP_ESTABLISHMENT_OR_MAINTENANCE_OF_CELL_POLARITY	GOBP_ESTABLISHMENT_OR_MAINTENANCE_OF_CELL_POLARITY	GOBP_ESTABLISHMENT_OR_MAINTENANCE_OF_CELL_POLARITY	2/189	130/5089	0.957923	0.996021	0.864462	Rab11fip2/Nde1	2	GO BP	up	NP
GOBP_CELL_DIVISION	GOBP_CELL_DIVISION	GOBP_CELL_DIVISION	6/189	286/5089	0.960107	0.996021	0.864462	Fign/Ank3/Blm/Dixdc1/Ccnd3/Nde1	6	GO BP	up	NP
GOBP_ENDOCYTOSIS	GOBP_ENDOCYTOSIS	GOBP_ENDOCYTOSIS	6/189	299/5089	0.970748	0.999836	0.867772	Ctsl/Apoe/Trf/Cd36/Cd81/Btbd8	6	GO BP	up	NP
GOBP_ENDOSOMAL_TRANSPORT	GOBP_ENDOSOMAL_TRANSPORT	GOBP_ENDOSOMAL_TRANSPORT	2/189	145/5089	0.974191	0.999836	0.867772	Btbd8/Cmtm6	2	GO BP	up	NP
GOBP_ESTABLISHMENT_OF_RNA_LOCALIZATION	GOBP_ESTABLISHMENT_OF_RNA_LOCALIZATION	GOBP_ESTABLISHMENT_OF_RNA_LOCALIZATION	1/189	105/5089	0.981972	0.999836	0.867772	Zfp36l1	1	GO BP	up	NP
GOBP_REGULATION_OF_MICROTUBULE_BASED_PROCESS	GOBP_REGULATION_OF_MICROTUBULE_BASED_PROCESS	GOBP_REGULATION_OF_MICROTUBULE_BASED_PROCESS	1/189	109/5089	0.984555	0.999836	0.867772	Dixdc1	1	GO BP	up	NP
GOBP_GLYCOSYLATION	GOBP_GLYCOSYLATION	GOBP_GLYCOSYLATION	1/189	110/5089	0.985142	0.999836	0.867772	St6gal1	1	GO BP	up	NP
GOBP_PROTEIN_FOLDING	GOBP_PROTEIN_FOLDING	GOBP_PROTEIN_FOLDING	1/189	115/5089	0.987757	0.999836	0.867772	Fkbp5	1	GO BP	up	NP
GOBP_VESICLE_LOCALIZATION	GOBP_VESICLE_LOCALIZATION	GOBP_VESICLE_LOCALIZATION	1/189	117/5089	0.988669	0.999836	0.867772	Nde1	1	GO BP	up	NP
GOBP_RNA_LOCALIZATION	GOBP_RNA_LOCALIZATION	GOBP_RNA_LOCALIZATION	1/189	129/5089	0.992887	0.999836	0.867772	Zfp36l1	1	GO BP	up	NP
GOBP_CHROMOSOME_SEGREGATION	GOBP_CHROMOSOME_SEGREGATION	GOBP_CHROMOSOME_SEGREGATION	1/189	146/5089	0.996329	0.999836	0.867772	Nde1	1	GO BP	up	NP
GOBP_MICROTUBULE_CYTOSKELETON_ORGANIZATION	GOBP_MICROTUBULE_CYTOSKELETON_ORGANIZATION	GOBP_MICROTUBULE_CYTOSKELETON_ORGANIZATION	3/189	257/5089	0.996974	0.999836	0.867772	Fign/Dixdc1/Nde1	3	GO BP	up	NP
GOBP_ACTIVATION_OF_IMMUNE_RESPONSE	GOBP_ACTIVATION_OF_IMMUNE_RESPONSE	GOBP_ACTIVATION_OF_IMMUNE_RESPONSE	1/189	154/5089	0.997313	0.999836	0.867772	Cd81	1	GO BP	up	NP
GOBP_GOLGI_VESICLE_TRANSPORT	GOBP_GOLGI_VESICLE_TRANSPORT	GOBP_GOLGI_VESICLE_TRANSPORT	2/189	223/5089	0.998217	0.999836	0.867772	Insig1/Ank3	2	GO BP	up	NP
GOBP_CELLULAR_RESPONSE_TO_EXTERNAL_STIMULUS	GOBP_CELLULAR_RESPONSE_TO_EXTERNAL_STIMULUS	GOBP_CELLULAR_RESPONSE_TO_EXTERNAL_STIMULUS	1/189	174/5089	0.998772	0.999836	0.867772	Agt	1	GO BP	up	NP
GOBP_ESTABLISHMENT_OF_ORGANELLE_LOCALIZATION	GOBP_ESTABLISHMENT_OF_ORGANELLE_LOCALIZATION	GOBP_ESTABLISHMENT_OF_ORGANELLE_LOCALIZATION	1/189	216/5089	0.999765	0.999836	0.867772	Nde1	1	GO BP	up	NP
GOBP_ORGANELLE_LOCALIZATION	GOBP_ORGANELLE_LOCALIZATION	GOBP_ORGANELLE_LOCALIZATION	2/189	289/5089	0.999836	0.999836	0.867772	Psen2/Nde1	2	GO BP	up	NP
HALLMARK_MYC_TARGETS_V2	HALLMARK_MYC_TARGETS_V2	HALLMARK_MYC_TARGETS_V2	1951-04-01	23/2342	0.00130187	0.0559806	0.0548158	Ppan/Nolc1/Nop56/Pprc1	4	HALLMARK	down	NP
HALLMARK_ALLOGRAFT_REJECTION1	HALLMARK_ALLOGRAFT_REJECTION	HALLMARK_ALLOGRAFT_REJECTION	1951-05-01	83/2342	0.0323905	0.540877	0.529623	Egfr/Aars/Inhba/H2-Q7/Bcl3	5	HALLMARK	down	NP
HALLMARK_INTERFERON_GAMMA_RESPONSE1	HALLMARK_INTERFERON_GAMMA_RESPONSE	HALLMARK_INTERFERON_GAMMA_RESPONSE	1951-06-01	116/2342	0.0377356	0.540877	0.529623	Ifi27/Tor1b/H2-Q7/Rnf213/Nup93/Gbp8	6	HALLMARK	down	NP
HALLMARK_KRAS_SIGNALING_DN1	HALLMARK_KRAS_SIGNALING_DN	HALLMARK_KRAS_SIGNALING_DN	1951-03-01	40/2342	0.0546381	0.548214	0.536807	Hc/Itih3/Kmt2d	3	HALLMARK	down	NP
HALLMARK_HYPOXIA1	HALLMARK_HYPOXIA	HALLMARK_HYPOXIA	1951-05-01	100/2342	0.0637458	0.548214	0.536807	Selenbp2/Egfr/Noct/Gpi1/Pam	5	HALLMARK	down	NP
HALLMARK_UNFOLDED_PROTEIN_RESPONSE1	HALLMARK_UNFOLDED_PROTEIN_RESPONSE	HALLMARK_UNFOLDED_PROTEIN_RESPONSE	1951-04-01	76/2342	0.0811784	0.557182	0.545589	Eif4a1/Nolc1/Nop56/Edc4	4	HALLMARK	down	NP
HALLMARK_UV_RESPONSE_UP1	HALLMARK_UV_RESPONSE_UP	HALLMARK_UV_RESPONSE_UP	1951-04-01	79/2342	0.0907041	0.557182	0.545589	Plcl1/Onecut1/Ddx21/Dgat1	4	HALLMARK	down	NP
HALLMARK_G2M_CHECKPOINT	HALLMARK_G2M_CHECKPOINT	HALLMARK_G2M_CHECKPOINT	1951-04-01	97/2342	0.158083	0.849696	0.832016	Rasal2/Nolc1/Bcl3/Upf1	4	HALLMARK	down	NP
HALLMARK_BILE_ACID_METABOLISM1	HALLMARK_BILE_ACID_METABOLISM	HALLMARK_BILE_ACID_METABOLISM	1951-03-01	87/2342	0.293782	0.950948	0.931161	Atxn1/Cyp7b1/Fads2	3	HALLMARK	down	NP
HALLMARK_ESTROGEN_RESPONSE_LATE1	HALLMARK_ESTROGEN_RESPONSE_LATE	HALLMARK_ESTROGEN_RESPONSE_LATE	1951-03-01	91/2342	0.318034	0.950948	0.931161	Cdh1/Cyp26b1/Cd44	3	HALLMARK	down	NP
HALLMARK_TNFA_SIGNALING_VIA_NFKB1	HALLMARK_TNFA_SIGNALING_VIA_NFKB	HALLMARK_TNFA_SIGNALING_VIA_NFKB	1951-03-01	99/2342	0.366639	0.950948	0.931161	Inhba/Bcl3/Cd44	3	HALLMARK	down	NP
HALLMARK_ESTROGEN_RESPONSE_EARLY1	HALLMARK_ESTROGEN_RESPONSE_EARLY	HALLMARK_ESTROGEN_RESPONSE_EARLY	1951-03-01	100/2342	0.372695	0.950948	0.931161	Tsku/Cyp26b1/Cd44	3	HALLMARK	down	NP
HALLMARK_INTERFERON_ALPHA_RESPONSE	HALLMARK_INTERFERON_ALPHA_RESPONSE	HALLMARK_INTERFERON_ALPHA_RESPONSE	1951-02-01	60/2342	0.37801	0.950948	0.931161	Ifi27/H2-Q7	2	HALLMARK	down	NP
HALLMARK_MYC_TARGETS_V1	HALLMARK_MYC_TARGETS_V1	HALLMARK_MYC_TARGETS_V1	1951-04-01	143/2342	0.379164	0.950948	0.931161	Eif4a1/Nolc1/Nop56/Ddx21	4	HALLMARK	down	NP
HALLMARK_GLYCOLYSIS1	HALLMARK_GLYCOLYSIS	HALLMARK_GLYCOLYSIS	1951-03-01	107/2342	0.414779	0.950948	0.931161	Egfr/Pam/Cd44	3	HALLMARK	down	NP
HALLMARK_E2F_TARGETS1	HALLMARK_E2F_TARGETS	HALLMARK_E2F_TARGETS	1951-02-01	73/2342	0.476781	0.950948	0.931161	Nolc1/Nop56	2	HALLMARK	down	NP
HALLMARK_EPITHELIAL_MESENCHYMAL_TRANSITION1	HALLMARK_EPITHELIAL_MESENCHYMAL_TRANSITION	HALLMARK_EPITHELIAL_MESENCHYMAL_TRANSITION	1951-02-01	76/2342	0.498274	0.950948	0.931161	Inhba/Cd44	2	HALLMARK	down	NP
HALLMARK_REACTIVE_OXYGEN_SPECIES_PATHWAY1	HALLMARK_REACTIVE_OXYGEN_SPECIES_PATHWAY	HALLMARK_REACTIVE_OXYGEN_SPECIES_PATHWAY	1951-01-01	33/2342	0.518872	0.950948	0.931161	Fes	1	HALLMARK	down	NP
HALLMARK_PROTEIN_SECRETION	HALLMARK_PROTEIN_SECRETION	HALLMARK_PROTEIN_SECRETION	1951-02-01	81/2342	0.532869	0.950948	0.931161	Egfr/Pam	2	HALLMARK	down	NP
HALLMARK_SPERMATOGENESIS1	HALLMARK_SPERMATOGENESIS	HALLMARK_SPERMATOGENESIS	1951-01-01	40/2342	0.588594	0.950948	0.931161	Grm8	1	HALLMARK	down	NP
HALLMARK_APICAL_JUNCTION1	HALLMARK_APICAL_JUNCTION	HALLMARK_APICAL_JUNCTION	1951-02-01	92/2342	0.603277	0.950948	0.931161	Egfr/Cdh1	2	HALLMARK	down	NP
HALLMARK_IL6_JAK_STAT3_SIGNALING1	HALLMARK_IL6_JAK_STAT3_SIGNALING	HALLMARK_IL6_JAK_STAT3_SIGNALING	1951-01-01	43/2342	0.615347	0.950948	0.931161	Cd44	1	HALLMARK	down	NP
HALLMARK_XENOBIOTIC_METABOLISM1	HALLMARK_XENOBIOTIC_METABOLISM	HALLMARK_XENOBIOTIC_METABOLISM	1951-03-01	145/2342	0.621658	0.950948	0.931161	Tkfc/Ddc/Esr1	3	HALLMARK	down	NP
HALLMARK_TGF_BETA_SIGNALING1	HALLMARK_TGF_BETA_SIGNALING	HALLMARK_TGF_BETA_SIGNALING	1951-01-01	44/2342	0.62388	0.950948	0.931161	Cdh1	1	HALLMARK	down	NP
HALLMARK_IL2_STAT5_SIGNALING1	HALLMARK_IL2_STAT5_SIGNALING	HALLMARK_IL2_STAT5_SIGNALING	1951-02-01	96/2342	0.626882	0.950948	0.931161	Etfbkmt/Cd44	2	HALLMARK	down	NP
HALLMARK_CHOLESTEROL_HOMEOSTASIS1	HALLMARK_CHOLESTEROL_HOMEOSTASIS	HALLMARK_CHOLESTEROL_HOMEOSTASIS	1951-01-01	47/2342	0.648381	0.950948	0.931161	Fads2	1	HALLMARK	down	NP
HALLMARK_P53_PATHWAY1	HALLMARK_P53_PATHWAY	HALLMARK_P53_PATHWAY	1951-02-01	103/2342	0.665626	0.950948	0.931161	Osgin1/Aen	2	HALLMARK	down	NP
HALLMARK_OXIDATIVE_PHOSPHORYLATION1	HALLMARK_OXIDATIVE_PHOSPHORYLATION	HALLMARK_OXIDATIVE_PHOSPHORYLATION	1951-03-01	155/2342	0.667543	0.950948	0.931161	Gpi1/Tcirg1/Acadvl	3	HALLMARK	down	NP
HALLMARK_UV_RESPONSE_DN1	HALLMARK_UV_RESPONSE_DN	HALLMARK_UV_RESPONSE_DN	1951-02-01	106/2342	0.681243	0.950948	0.931161	Atxn1/Celf2	2	HALLMARK	down	NP
HALLMARK_PEROXISOME1	HALLMARK_PEROXISOME	HALLMARK_PEROXISOME	1951-01-01	64/2342	0.760356	0.950948	0.931161	Atxn1	1	HALLMARK	down	NP
HALLMARK_MTORC1_SIGNALING1	HALLMARK_MTORC1_SIGNALING	HALLMARK_MTORC1_SIGNALING	1951-02-01	127/2342	0.774822	0.950948	0.931161	Fads2/Gpi1	2	HALLMARK	down	NP
HALLMARK_DNA_REPAIR1	HALLMARK_DNA_REPAIR	HALLMARK_DNA_REPAIR	1951-01-01	68/2342	0.78112	0.950948	0.931161	Ddb1	1	HALLMARK	down	NP
HALLMARK_PI3K_AKT_MTOR_SIGNALING1	HALLMARK_PI3K_AKT_MTOR_SIGNALING	HALLMARK_PI3K_AKT_MTOR_SIGNALING	1951-01-01	70/2342	0.790829	0.950948	0.931161	Egfr	1	HALLMARK	down	NP
HALLMARK_MITOTIC_SPINDLE1	HALLMARK_MITOTIC_SPINDLE	HALLMARK_MITOTIC_SPINDLE	1951-02-01	133/2342	0.796866	0.950948	0.931161	Mid1/Rasal2	2	HALLMARK	down	NP
HALLMARK_INFLAMMATORY_RESPONSE1	HALLMARK_INFLAMMATORY_RESPONSE	HALLMARK_INFLAMMATORY_RESPONSE	1951-01-01	76/2342	0.817494	0.950948	0.931161	Inhba	1	HALLMARK	down	NP
HALLMARK_ANDROGEN_RESPONSE1	HALLMARK_ANDROGEN_RESPONSE	HALLMARK_ANDROGEN_RESPONSE	1951-01-01	78/2342	0.825619	0.950948	0.931161	Pgm3	1	HALLMARK	down	NP
HALLMARK_COAGULATION1	HALLMARK_COAGULATION	HALLMARK_COAGULATION	1951-01-01	87/2342	0.858001	0.950948	0.931161	C9	1	HALLMARK	down	NP
HALLMARK_KRAS_SIGNALING_UP1	HALLMARK_KRAS_SIGNALING_UP	HALLMARK_KRAS_SIGNALING_UP	1951-01-01	90/2342	0.867424	0.950948	0.931161	Inhba	1	HALLMARK	down	NP
HALLMARK_APOPTOSIS1	HALLMARK_APOPTOSIS	HALLMARK_APOPTOSIS	1951-01-01	91/2342	0.870426	0.950948	0.931161	Cd44	1	HALLMARK	down	NP
HALLMARK_COMPLEMENT1	HALLMARK_COMPLEMENT	HALLMARK_COMPLEMENT	1951-01-01	113/2342	0.921924	0.950948	0.931161	C9	1	HALLMARK	down	NP
HALLMARK_FATTY_ACID_METABOLISM1	HALLMARK_FATTY_ACID_METABOLISM	HALLMARK_FATTY_ACID_METABOLISM	1951-01-01	113/2342	0.921924	0.950948	0.931161	Acadvl	1	HALLMARK	down	NP
HALLMARK_HEME_METABOLISM1	HALLMARK_HEME_METABOLISM	HALLMARK_HEME_METABOLISM	1951-01-01	117/2342	0.928833	0.950948	0.931161	Selenbp2	1	HALLMARK	down	NP
HALLMARK_ADIPOGENESIS1	HALLMARK_ADIPOGENESIS	HALLMARK_ADIPOGENESIS	1951-01-01	150/2342	0.967076	0.967076	0.946953	Dgat1	1	HALLMARK	down	NP
REACTOME_METABOLIC_DISORDERS_OF_BIOLOGICAL_OXIDATION_ENZYMES1	REACTOME_METABOLIC_DISORDERS_OF_BIOLOGICAL_OXIDATION_ENZYMES	REACTOME_METABOLIC_DISORDERS_OF_BIOLOGICAL_OXIDATION_ENZYMES	1982-04-01	15/4668	0.000104223	0.033143	0.033143	Cyp7b1/Oplah/Cyp2u1/Cyp26b1	4	REACTOME	down	NP
REACTOME_INTERFERON_SIGNALING	REACTOME_INTERFERON_SIGNALING	REACTOME_INTERFERON_SIGNALING	1982-07-01	106/4668	0.00239612	0.380983	0.380983	Mid1/Ifi27/Eif4a1/H2-Q7/Nup93/Cd44/Gbp8	7	REACTOME	down	NP
REACTOME_COMPLEMENT_CASCADE1	REACTOME_COMPLEMENT_CASCADE	REACTOME_COMPLEMENT_CASCADE	1982-04-01	38/4668	0.00414629	0.439507	0.439507	C6/Hc/C4b/C9	4	REACTOME	down	NP
REACTOME_INTERFERON_GAMMA_SIGNALING	REACTOME_INTERFERON_GAMMA_SIGNALING	REACTOME_INTERFERON_GAMMA_SIGNALING	1982-04-01	45/4668	0.00762762	0.606396	0.606396	Mid1/H2-Q7/Cd44/Gbp8	4	REACTOME	down	NP
REACTOME_ASSOCIATION_OF_TRIC_CCT_WITH_TARGET_PROTEINS_DURING_BIOSYNTHESIS	REACTOME_ASSOCIATION_OF_TRIC_CCT_WITH_TARGET_PROTEINS_DURING_BIOSYNTHESIS	REACTOME_ASSOCIATION_OF_TRIC_CCT_WITH_TARGET_PROTEINS_DURING_BIOSYNTHESIS	1982-03-01	27/4668	0.0112789	0.717335	0.717335	Nop56/Skiv2l/Fbxw5	3	REACTOME	down	NP
REACTOME_CYTOCHROME_P450_ARRANGED_BY_SUBSTRATE_TYPE1	REACTOME_CYTOCHROME_P450_ARRANGED_BY_SUBSTRATE_TYPE	REACTOME_CYTOCHROME_P450_ARRANGED_BY_SUBSTRATE_TYPE	1982-03-01	31/4668	0.0164845	0.773384	0.773384	Cyp7b1/Cyp2u1/Cyp26b1	3	REACTOME	down	NP
REACTOME_G_ALPHA_I_SIGNALLING_EVENTS1	REACTOME_G_ALPHA_I_SIGNALLING_EVENTS	REACTOME_G_ALPHA_I_SIGNALLING_EVENTS	1982-04-01	66/4668	0.0279853	0.773384	0.773384	Hc/Grm8/Pde4a/Nbea	4	REACTOME	down	NP
REACTOME_ION_CHANNEL_TRANSPORT	REACTOME_ION_CHANNEL_TRANSPORT	REACTOME_ION_CHANNEL_TRANSPORT	1982-04-01	69/4668	0.0322765	0.773384	0.773384	Tcirg1/Ttyh2/Atp13a1/Atp11a	4	REACTOME	down	NP
REACTOME_DEADENYLATION_DEPENDENT_MRNA_DECAY	REACTOME_DEADENYLATION_DEPENDENT_MRNA_DECAY	REACTOME_DEADENYLATION_DEPENDENT_MRNA_DECAY	1982-03-01	40/4668	0.0323837	0.773384	0.773384	Eif4a1/Edc4/Skiv2l	3	REACTOME	down	NP
REACTOME_DISEASES_OF_METABOLISM1	REACTOME_DISEASES_OF_METABOLISM	REACTOME_DISEASES_OF_METABOLISM	1982-05-01	105/4668	0.0364236	0.773384	0.773384	Cyp7b1/Hexb/Oplah/Cyp2u1/Cyp26b1	5	REACTOME	down	NP
REACTOME_TRANSCRIPTIONAL_REGULATION_BY_THE_AP_2_TFAP2_FAMILY_OF_TRANSCRIPTION_FACTORS1	REACTOME_TRANSCRIPTIONAL_REGULATION_BY_THE_AP_2_TFAP2_FAMILY_OF_TRANSCRIPTION_FACTORS	REACTOME_TRANSCRIPTIONAL_REGULATION_BY_THE_AP_2_TFAP2_FAMILY_OF_TRANSCRIPTION_FACTORS	1982-02-01	18/4668	0.03888	0.773384	0.773384	Egfr/Esr1	2	REACTOME	down	NP
REACTOME_PROTEIN_FOLDING	REACTOME_PROTEIN_FOLDING	REACTOME_PROTEIN_FOLDING	1982-03-01	48/4668	0.0513407	0.773384	0.773384	Nop56/Skiv2l/Fbxw5	3	REACTOME	down	NP
REACTOME_NUCLEAR_PORE_COMPLEX_NPC_DISASSEMBLY	REACTOME_NUCLEAR_PORE_COMPLEX_NPC_DISASSEMBLY	REACTOME_NUCLEAR_PORE_COMPLEX_NPC_DISASSEMBLY	1982-02-01	23/4668	0.060784	0.773384	0.773384	Nek6/Nup93	2	REACTOME	down	NP
REACTOME_REGULATION_OF_BETA_CELL_DEVELOPMENT	REACTOME_REGULATION_OF_BETA_CELL_DEVELOPMENT	REACTOME_REGULATION_OF_BETA_CELL_DEVELOPMENT	1982-02-01	23/4668	0.060784	0.773384	0.773384	Onecut1/Foxa3	2	REACTOME	down	NP
REACTOME_ION_TRANSPORT_BY_P_TYPE_ATPASES	REACTOME_ION_TRANSPORT_BY_P_TYPE_ATPASES	REACTOME_ION_TRANSPORT_BY_P_TYPE_ATPASES	1982-02-01	24/4668	0.065573	0.773384	0.773384	Atp13a1/Atp11a	2	REACTOME	down	NP
REACTOME_PHASE_I_FUNCTIONALIZATION_OF_COMPOUNDS1	REACTOME_PHASE_I_FUNCTIONALIZATION_OF_COMPOUNDS	REACTOME_PHASE_I_FUNCTIONALIZATION_OF_COMPOUNDS	1982-03-01	54/4668	0.0683818	0.773384	0.773384	Cyp7b1/Cyp2u1/Cyp26b1	3	REACTOME	down	NP
REACTOME_IMMUNOREGULATORY_INTERACTIONS_BETWEEN_A_LYMPHOID_AND_A_NON_LYMPHOID_CELL1	REACTOME_IMMUNOREGULATORY_INTERACTIONS_BETWEEN_A_LYMPHOID_AND_A_NON_LYMPHOID_CELL	REACTOME_IMMUNOREGULATORY_INTERACTIONS_BETWEEN_A_LYMPHOID_AND_A_NON_LYMPHOID_CELL	1982-02-01	25/4668	0.0704841	0.773384	0.773384	H2-Q7/Cdh1	2	REACTOME	down	NP
REACTOME_SIGNALING_BY_GPCR1	REACTOME_SIGNALING_BY_GPCR	REACTOME_SIGNALING_BY_GPCR	1982-06-01	167/4668	0.0719793	0.773384	0.773384	Egfr/Hc/Grm8/Pde4a/Nbea/Pde10a	6	REACTOME	down	NP
REACTOME_TRNA_AMINOACYLATION	REACTOME_TRNA_AMINOACYLATION	REACTOME_TRNA_AMINOACYLATION	1982-02-01	26/4668	0.0755118	0.773384	0.773384	Lars2/Aars	2	REACTOME	down	NP
REACTOME_RUNX1_REGULATES_GENES_INVOLVED_IN_MEGAKARYOCYTE_DIFFERENTIATION_AND_PLATELET_FUNCTION1	REACTOME_RUNX1_REGULATES_GENES_INVOLVED_IN_MEGAKARYOCYTE_DIFFERENTIATION_AND_PLATELET_FUNCTION	REACTOME_RUNX1_REGULATES_GENES_INVOLVED_IN_MEGAKARYOCYTE_DIFFERENTIATION_AND_PLATELET_FUNCTION	1982-02-01	27/4668	0.0806504	0.773384	0.773384	Kmt2d/Setd1a	2	REACTOME	down	NP
REACTOME_BIOLOGICAL_OXIDATIONS1	REACTOME_BIOLOGICAL_OXIDATIONS	REACTOME_BIOLOGICAL_OXIDATIONS	1982-04-01	98/4668	0.0926124	0.773384	0.773384	Cyp7b1/Oplah/Cyp2u1/Cyp26b1	4	REACTOME	down	NP
[truncated: 2,054 more rows]
