# Supplementary material for: Size-dependent plastic exposure disrupts macrophage function and tissue-specific metabolism
Source: Research Square preprint supplement (doi:10.21203/rs.3.rs-6204281/v1), 2025-03-18
Supplement: Supplementary file 6 [file fe835515ba47ba4f4efc639a.xlsx]

## Sheet: DEG_NP_vs_Ctrl
	p_val	avg_log2FC	pct.1	pct.2	p_val_adj
Saa3	3.57769e-14	-0.604517	0.11	0.322	8.12493e-11
Jund	3.63432e-13	-0.930557	0.126	0.329	8.25354e-10
Cux1	6.67546e-12	-1.04038	0.049	0.185	1.516e-08
Apbb1ip	1.49345e-10	-0.583192	0.179	0.388	3.39163e-07
Rnf19b	3.15707e-10	-0.396769	0.066	0.206	7.1697e-07
Pik3r1	8.12218e-10	-0.338527	0.159	0.364	1.84455e-06
Spag9	2.36002e-09	-0.644962	0.058	0.182	5.35961e-06
Hnrnpa1	3.28615e-09	-0.244033	0.077	0.217	7.46285e-06
Rps27a	3.52456e-09	-0.573414	0.209	0.395	8.00427e-06
Adap2	4.69704e-09	-0.295619	0.122	0.294	1.0667e-05
Dock10	4.84372e-09	-0.482234	0.183	0.378	1.10001e-05
Aff4	4.94882e-09	-0.627987	0.07	0.199	1.12388e-05
Prpf39	5.50019e-09	-0.34539	0.053	0.171	1.24909e-05
Ep300	5.54277e-09	-0.786221	0.089	0.227	1.25876e-05
Sh3yl1	8.42678e-09	-0.415627	0.164	0.35	1.91372e-05
Sbk1	1.09976e-08	-0.642204	0.135	0.297	2.49755e-05
Gps1	1.16023e-08	-0.340158	0.103	0.255	2.63489e-05
Crlf3	2.18824e-08	-0.456487	0.084	0.217	4.9695e-05
Klf6	2.32548e-08	-0.367516	0.235	0.448	5.28117e-05
Nrip1	2.83044e-08	-0.502259	0.185	0.371	6.42794e-05
Ktn1	3.35477e-08	-0.419891	0.112	0.262	7.61867e-05
Sqstm1	3.66939e-08	-0.539013	0.113	0.262	8.33318e-05
Tmem63a	4.37586e-08	-0.28113	0.091	0.231	9.93758e-05
Pou2f2	4.49208e-08	-0.26812	0.131	0.294	0.000102015
Pde1b	5.03456e-08	-0.362221	0.218	0.42	0.000114335
Cd164	5.25258e-08	-0.30602	0.183	0.374	0.000119286
Bclaf1	5.66314e-08	-0.295484	0.123	0.28	0.00012861
Tcf25	6.04789e-08	-0.385532	0.114	0.262	0.000137347
Tfb1m	7.40386e-08	-0.36793	0.131	0.287	0.000168142
Cct2	8.06274e-08	-0.383609	0.123	0.276	0.000183105
Sf3b2	8.49576e-08	-0.400692	0.138	0.297	0.000192939
Prpf38b	9.61373e-08	-0.437942	0.118	0.266	0.000218328
Arsg	9.7887e-08	-0.555877	0.126	0.273	0.000222301
Smagp	1.25304e-07	-0.385629	0.071	0.189	0.000284565
Acin1	1.48127e-07	-0.365883	0.171	0.346	0.000336396
Zc3h7a	1.64938e-07	-0.444335	0.098	0.231	0.000374575
Xbp1	1.75064e-07	-0.209058	0.085	0.213	0.000397571
Hnrnpk	2.04183e-07	-0.228704	0.18	0.36	0.0004637
Hk3	2.21927e-07	-0.298424	0.109	0.248	0.000503997
Srrm2	2.22329e-07	-0.267718	0.312	0.538	0.000504909
Atox1	2.22998e-07	-0.283171	0.048	0.147	0.000506428
U2surp	2.23278e-07	-0.593741	0.082	0.203	0.000507065
Zfp36l2	2.33821e-07	-0.362042	0.159	0.325	0.000531008
Rhag	2.34536e-07	-0.345284	0.065	0.175	0.000532632
Txnip	2.48101e-07	-0.381502	0.204	0.388	0.000563438
Mmp1a	2.51388e-07	-0.410036	0.057	0.161	0.000570903
Celf2	2.88792e-07	-0.235142	0.133	0.29	0.000655846
Adgra3	3.15564e-07	-0.560452	0.038	0.126	0.000716645
Ppp1r12a	3.17234e-07	-0.455402	0.142	0.294	0.000720439
Cd37	3.21186e-07	-0.271216	0.094	0.224	0.000729413
Rab14	3.2985e-07	-0.322561	0.132	0.28	0.00074909
Cers3	3.59366e-07	-0.233926	0.038	0.126	0.00081612
Mbd2	3.753e-07	-0.474228	0.062	0.168	0.000852306
Tnrc6b	3.91469e-07	-0.130447	0.094	0.224	0.000889026
Timp2	4.37481e-07	-0.433156	0.225	0.413	0.00099352
Ddx3x	4.71366e-07	-0.450215	0.278	0.476	0.00107047
Soga1	4.79019e-07	-0.276957	0.289	0.51	0.00108785
Tacc1	4.90766e-07	-0.253376	0.142	0.297	0.00111453
Glyat	4.94955e-07	-0.506233	0.043	0.133	0.00112404
Leap2	4.96982e-07	-0.40316	0.165	0.325	0.00112865
Med13	5.11384e-07	-0.229225	0.128	0.276	0.00116135
Efl1	5.1769e-07	-0.195082	0.207	0.388	0.00117567
Ddx39	5.26559e-07	-0.46093	0.055	0.154	0.00119582
Gatad2b	5.30641e-07	-0.602384	0.042	0.129	0.00120508
Hmgn1	5.33526e-07	-0.294604	0.217	0.385	0.00121164
Etnk1	5.35766e-07	-0.159326	0.062	0.168	0.00121673
Nfkbiz	5.36494e-07	-0.376019	0.109	0.245	0.00121838
Zfp263	5.54587e-07	-0.207276	0.036	0.119	0.00125947
Map4k4	5.55367e-07	-0.288368	0.179	0.35	0.00126124
Fcho2	5.55517e-07	-0.421572	0.067	0.175	0.00126158
Mapre1	5.58517e-07	-0.290369	0.08	0.196	0.00126839
Brd4	6.53701e-07	-0.277085	0.096	0.224	0.00148456
Hectd1	6.71327e-07	-0.386999	0.067	0.175	0.00152458
Tmem50a	6.88363e-07	-0.230885	0.161	0.325	0.00156327
Deup1	6.99772e-07	-0.226859	0.148	0.304	0.00158918
Cmklr1	7.45013e-07	-0.352625	0.063	0.168	0.00169192
Cep170	7.67836e-07	-0.47415	0.052	0.147	0.00174376
Asf1b	7.75192e-07	-0.368748	0.056	0.154	0.00176046
Smad7	7.88303e-07	-0.467002	0.058	0.157	0.00179024
Ppme1	8.68665e-07	-0.381725	0.155	0.311	0.00197274
Tbc1d17	9.01089e-07	-0.394269	0.048	0.14	0.00204637
Pdia6	9.09874e-07	-0.223424	0.151	0.308	0.00206632
Kmt2a	9.20302e-07	-0.430737	0.121	0.255	0.00209001
Serbp1	9.56644e-07	-0.206987	0.274	0.486	0.00217254
Usp2	9.66261e-07	-0.178484	0.104	0.234	0.00219438
Rif1	9.67654e-07	-0.445945	0.055	0.15	0.00219754
Celf1	1.02483e-06	-0.486195	0.187	0.346	0.00232738
Tagap	1.06078e-06	-0.32651	0.07	0.175	0.00240904
Prkcg	1.1012e-06	-0.339026	0.044	0.133	0.00250081
Atrx	1.21988e-06	-0.325415	0.147	0.297	0.00277036
Brd7	1.25473e-06	-0.47645	0.036	0.115	0.00284949
Usp8	1.31394e-06	-0.392538	0.109	0.238	0.00298395
Tor1aip1	1.42667e-06	-0.114955	0.113	0.248	0.00323996
Slx4	1.44536e-06	-0.432112	0.109	0.238	0.00328242
Abcd3	1.45049e-06	-0.374884	0.107	0.231	0.00329406
Wdfy1	1.46593e-06	-0.27826	0.039	0.122	0.00332913
Milr1	1.54517e-06	-0.322176	0.053	0.147	0.00350908
Eif3c	1.56274e-06	-0.113962	0.114	0.248	0.00354899
Hp1bp3	1.66876e-06	-0.261946	0.113	0.245	0.00378975
Hdlbp	1.70476e-06	-0.232082	0.119	0.252	0.00387151
Lpin2	1.77225e-06	-0.303897	0.155	0.304	0.00402477
Cdk12	1.80788e-06	-0.668681	0.043	0.126	0.00410569
Tarsl2	1.90501e-06	-0.181413	0.049	0.14	0.00432627
Tpd52	1.90668e-06	-0.482162	0.055	0.147	0.00433007
Dgke	2.062e-06	-0.161698	0.089	0.206	0.0046828
Ywhaz	2.09557e-06	-0.223343	0.137	0.28	0.00475904
Paip2b	2.17303e-06	-0.431553	0.041	0.122	0.00493495
Dip2b	2.30617e-06	-0.353437	0.115	0.245	0.0052373
Galnt2	2.35433e-06	-0.236642	0.037	0.115	0.00534669
Ldhb	2.37204e-06	-0.136207	0.217	0.392	0.00538691
Ube2o	2.43518e-06	-0.217978	0.155	0.308	0.0055303
Sort1	2.47454e-06	-0.183096	0.065	0.164	0.00561968
N4bp1	2.58411e-06	-0.406055	0.072	0.175	0.00586852
Larp1	2.63412e-06	-0.386737	0.047	0.133	0.0059821
Pabpn1l	2.794e-06	-0.203404	0.114	0.241	0.00634518
Gosr1	2.79982e-06	-0.316061	0.063	0.161	0.00635839
Ppp4r2	2.87815e-06	-0.127265	0.047	0.133	0.00653627
Anp32e	3.10692e-06	-0.328247	0.096	0.213	0.00705582
Nav3	3.21213e-06	-0.272543	0.162	0.311	0.00729475
Srsf7	3.25056e-06	-0.182426	0.115	0.245	0.00738201
Suco	3.3876e-06	-0.455636	0.062	0.157	0.00769324
Btf3	3.46705e-06	-0.520949	0.07	0.168	0.00787368
Rsrc2	3.52072e-06	-0.262198	0.124	0.259	0.00799556
Ndufb7	3.74868e-06	-0.578483	0.055	0.143	0.00851326
Hnrnpa2b1	3.84378e-06	-0.189617	0.301	0.51	0.00872924
Erp29	3.84507e-06	-0.313746	0.176	0.332	0.00873216
Etv3	3.85932e-06	-0.575805	0.025	0.091	0.00876452
Cd47	4.00625e-06	-0.481736	0.088	0.196	0.00909819
Rab3il1	4.04473e-06	-0.471213	0.107	0.224	0.00918558
St3gal6	4.07941e-06	-0.0823063	0.168	0.329	0.00926433
Ppp1r18	4.08649e-06	-0.425532	0.061	0.154	0.00928041
Ube3b	4.10644e-06	-0.112083	0.133	0.273	0.00932572
Pip4k2a	4.16495e-06	-0.322209	0.204	0.367	0.0094586
Tcf4	4.30004e-06	-0.366219	0.131	0.262	0.00976539
Rbpj	4.31429e-06	-0.188485	0.029	0.098	0.00979775
Rock2	4.48319e-06	-0.260272	0.181	0.336	0.0101813
Gng3	4.57147e-06	-0.398954	0.061	0.154	0.0103818
St13	5.09584e-06	-0.410373	0.1	0.217	0.0115727
Brd2	5.19293e-06	-0.257557	0.298	0.5	0.0117932
Fblim1	5.36503e-06	-0.341219	0.14	0.276	0.012184
Fgd2	5.39975e-06	-0.211832	0.199	0.367	0.0122628
Actr1a	5.46042e-06	-0.381289	0.033	0.105	0.0124006
Nsd3	5.54811e-06	-0.313981	0.066	0.161	0.0125998
Rasal1	5.7206e-06	-0.342142	0.07	0.168	0.0129915
Lcp2	5.90122e-06	-0.236842	0.09	0.199	0.0134017
Usp34	5.99771e-06	-0.520995	0.095	0.203	0.0136208
Ier3	6.11766e-06	-0.541892	0.036	0.108	0.0138932
Cd2ap	6.13201e-06	-0.0864932	0.133	0.269	0.0139258
Zfp36	6.40282e-06	-0.236324	0.199	0.36	0.0145408
Kif5b	6.44064e-06	-0.192699	0.085	0.192	0.0146267
Pxn	6.57629e-06	-0.373382	0.043	0.122	0.0149347
Clint1	6.63828e-06	-0.388414	0.075	0.175	0.0150755
Dnajc3	7.1922e-06	-0.34051	0.099	0.213	0.0163335
Ddx50	7.28163e-06	-0.393539	0.058	0.147	0.0165366
Ecpas	7.39394e-06	-0.244312	0.057	0.147	0.0167916
Il6ra	7.43365e-06	-0.255874	0.288	0.483	0.0168818
Rogdi	7.69472e-06	-0.0891132	0.061	0.154	0.0174747
Cpne2	7.7209e-06	-0.0902966	0.168	0.322	0.0175342
Frmd4b	8.03529e-06	-0.209239	0.09	0.199	0.0182482
Ythdc1	8.04906e-06	-0.0653779	0.122	0.252	0.0182794
Tmed3	8.14322e-06	-0.502864	0.094	0.203	0.0184932
Ncoa3	8.18735e-06	-0.167371	0.07	0.168	0.0185935
Rgl3	8.63581e-06	-0.172989	0.089	0.196	0.0196119
Matr3	9.13629e-06	-0.133002	0.088	0.192	0.0207485
Spcs2	9.25614e-06	-0.265895	0.088	0.192	0.0210207
Wbp4	9.2625e-06	-0.342875	0.03	0.098	0.0210351
Gsdmd	9.64632e-06	-0.219753	0.052	0.136	0.0219068
Srrt	9.86771e-06	-0.382554	0.099	0.21	0.0224096
Sertad1	9.9497e-06	-0.583643	0.041	0.115	0.0225958
Ism1	1.07156e-05	-0.323695	0.063	0.154	0.0243352
Brwd1	1.07496e-05	-0.467469	0.077	0.175	0.0244123
Setd2	1.10403e-05	-0.32101	0.113	0.231	0.0250725
Rnpep	1.11379e-05	-0.375861	0.044	0.122	0.0252941
Tpst2	1.11649e-05	-0.424581	0.1	0.21	0.0253554
Ubxn4	1.13143e-05	-0.291414	0.086	0.189	0.0256949
Tlr1	1.13148e-05	-0.404529	0.112	0.227	0.0256958
H3f3a	1.17432e-05	-0.139796	0.154	0.29	0.0266689
Tspan13	1.18444e-05	-0.301353	0.025	0.087	0.0268987
Sptbn2	1.19297e-05	-0.393944	0.047	0.126	0.0270924
Myo9a	1.22611e-05	-0.574619	0.058	0.143	0.0278449
Man2a2	1.23345e-05	-0.320606	0.07	0.164	0.0280117
Ddx6	1.25012e-05	0.00503843	0.178	0.336	0.0283903
Snx6	1.26563e-05	-0.399907	0.096	0.203	0.0287426
Rnf13	1.27725e-05	-0.0893245	0.132	0.266	0.0290063
Tifab	1.36032e-05	-0.344914	0.1	0.21	0.0308928
Ubr5	1.38466e-05	-0.440852	0.065	0.154	0.0314457
Syde2	1.40378e-05	-0.580479	0.057	0.14	0.0318799
Rtn4rl1	1.46146e-05	-0.113391	0.109	0.227	0.0331897
Tram1	1.48832e-05	-0.28676	0.06	0.147	0.0337997
Arl6ip1	1.53081e-05	-0.254548	0.142	0.276	0.0347646
Arhgap12	1.53775e-05	-0.165361	0.099	0.21	0.0349222
Ifnar2	1.55421e-05	-0.181952	0.126	0.248	0.0352962
Palm3	1.56546e-05	-0.281073	0.113	0.227	0.0355515
Tsc22d3	1.60402e-05	-0.224743	0.077	0.175	0.0364272
Cald1	1.6348e-05	-0.110319	0.119	0.241	0.0371263
Ifngr2	1.65382e-05	-0.504561	0.057	0.14	0.0375582
Slc29a3	1.70811e-05	-0.281848	0.207	0.364	0.0387912
Atp2b1	1.72111e-05	-0.173982	0.142	0.273	0.0390865
Kdm3a	1.72145e-05	-0.508456	0.042	0.115	0.0390942
Peli1	1.75778e-05	-0.0977966	0.105	0.22	0.0399193
Tmcc3	1.80993e-05	-0.226714	0.093	0.199	0.0411035
Arid4a	1.82899e-05	-0.366232	0.123	0.241	0.0415364
Hdac1	1.85668e-05	-0.257661	0.057	0.14	0.0421653
Morf4l1	1.86635e-05	-0.219098	0.218	0.367	0.0423848
Nfe2l1	1.90397e-05	-0.446371	0.038	0.108	0.0432392
Npc1	1.91583e-05	-0.363779	0.067	0.157	0.0435085
Pmp22	1.9917e-05	-0.251814	0.099	0.206	0.0452315
Dao	2.06561e-05	-0.0698454	0.137	0.269	0.04691
Wac	2.07675e-05	-0.375639	0.061	0.147	0.0471631
Crp	2.10201e-05	-0.465421	0.069	0.157	0.0477367
Dhx9	2.24568e-05	-0.22881	0.102	0.21	0.0509994
Stx4a	2.27245e-05	-0.465989	0.088	0.185	0.0516073
BC005537	2.28873e-05	-0.12676	0.141	0.269	0.0519771
Tbx4	2.31117e-05	-0.257469	0.156	0.29	0.0524867
Aaas	2.33886e-05	-0.154887	0.038	0.108	0.0531155
Usp35	2.36756e-05	-0.25531	0.048	0.126	0.0537674
Abhd12	2.40986e-05	-0.156619	0.213	0.371	0.054728
Ltc4s	2.46762e-05	-0.224071	0.055	0.136	0.0560397
Nktr	2.48877e-05	-0.28709	0.123	0.241	0.05652
Prpf4	2.52367e-05	-0.111523	0.109	0.224	0.0573125
Erap1	2.66448e-05	-0.266573	0.043	0.115	0.0605104
Lpp	2.67016e-05	-0.356001	0.109	0.22	0.0606393
Tdo2	2.67736e-05	-0.346919	0.056	0.136	0.0608028
Rala	2.70224e-05	-0.218635	0.041	0.112	0.0613679
Frrs1	2.74047e-05	-0.389461	0.043	0.115	0.0622362
Zfp292	2.74674e-05	-0.098703	0.091	0.196	0.0623785
Plk2	2.75473e-05	-0.383894	0.071	0.161	0.0625599
Irf3	2.85613e-05	-0.204506	0.06	0.143	0.0648627
Bbs1	2.89193e-05	-0.326399	0.043	0.115	0.0656756
Ddx42	2.93598e-05	-0.28246	0.069	0.157	0.0666761
Hspa1a	3.02369e-05	1.52168	0.286	0.189	0.0686679
Purg	3.06379e-05	-0.101769	0.099	0.206	0.0695787
Serpinb2	3.12404e-05	-0.104181	0.242	0.413	0.0709469
Rpl10	3.16617e-05	-0.336612	0.326	0.479	0.0719038
Chmp4b	3.17899e-05	-0.539034	0.055	0.133	0.0721948
Camk1g	3.22179e-05	-0.26878	0.114	0.227	0.0731669
Fxr1	3.29357e-05	-0.314303	0.071	0.161	0.0747969
Trf	3.32765e-05	-0.27676	0.468	0.65	0.075571
Agmo	3.41379e-05	-0.283461	0.113	0.224	0.0775273
Rock1	3.48864e-05	-0.131197	0.152	0.283	0.0792271
St6galnac4	3.49113e-05	-0.292214	0.043	0.115	0.0792836
Usp1	3.50856e-05	-0.129521	0.089	0.189	0.0796794
Cd53	3.52696e-05	-0.202769	0.145	0.273	0.0800974
Lyar	3.54098e-05	-0.390639	0.048	0.122	0.0804156
Snx5	3.61052e-05	-0.142183	0.242	0.409	0.081995
Zmym2	3.72508e-05	-0.275558	0.207	0.357	0.0845966
Pnpla7	3.74538e-05	-0.445206	0.06	0.14	0.0850575
Usb1	3.81342e-05	-0.0916965	0.173	0.315	0.0866027
Hspa1b	3.85234e-05	1.62392	0.114	0.035	0.0874866
Srsf9	3.86145e-05	-0.464463	0.042	0.112	0.0876935
Adam17	3.87896e-05	-0.167821	0.147	0.276	0.0880912
Hltf	3.93473e-05	-0.2917	0.063	0.147	0.0893577
Ewsr1	3.95975e-05	-0.109072	0.1	0.206	0.0899259
Pmepa1	4.09467e-05	-0.117338	0.24	0.409	0.09299
Grm2	4.0961e-05	-0.252666	0.147	0.276	0.0930224
Ano1	4.10073e-05	-0.203442	0.214	0.374	0.0931277
Fam49b	4.14506e-05	-0.165662	0.155	0.287	0.0941344
Sdf4	4.19215e-05	-0.0937942	0.103	0.21	0.0952038
Dido1	4.28246e-05	-0.306728	0.048	0.122	0.0972547
Ccar1	4.30325e-05	-0.0210397	0.069	0.157	0.0977268
Naa35	4.42676e-05	-0.149382	0.088	0.185	0.100532
Dusp6	4.43422e-05	-0.13743	0.11	0.22	0.100701
Spire1	4.4953e-05	-0.436178	0.044	0.115	0.102088
Aox2	4.4953e-05	-0.431805	0.044	0.115	0.102088
Tmed10	4.56625e-05	-0.106729	0.145	0.269	0.103699
Ucp2	4.59544e-05	-0.435148	0.053	0.129	0.104362
Baz1a	4.60756e-05	-0.20403	0.072	0.161	0.104638
Arl4c	4.70409e-05	-0.158916	0.199	0.343	0.10683
Ctdspl2	4.72334e-05	-0.341219	0.053	0.129	0.107267
M6pr	4.93121e-05	-0.159677	0.11	0.22	0.111988
Pank2	5.04573e-05	-0.111121	0.113	0.224	0.114589
Nars	5.07763e-05	-0.109549	0.171	0.308	0.115313
Dpysl2	5.42881e-05	-0.15582	0.072	0.161	0.123288
Slc25a3	5.45767e-05	0.0494575	0.109	0.22	0.123944
Plxna4	5.51109e-05	-0.689096	0.048	0.119	0.125157
Rpl23	5.51871e-05	-0.113202	0.249	0.402	0.12533
Hnrnpul2	5.53195e-05	0.0227571	0.102	0.206	0.12563
Ywhah	5.58727e-05	-0.363384	0.197	0.332	0.126887
Rpl21	5.63216e-05	-0.364504	0.288	0.434	0.127906
Gvin1	5.79929e-05	-0.257082	0.105	0.206	0.131702
Safb2	5.82812e-05	-0.25148	0.176	0.311	0.132357
Klf4	5.9378e-05	-0.250322	0.247	0.406	0.134847
Dnttip2	5.97501e-05	-0.502261	0.055	0.129	0.135692
Atp1a1	5.99496e-05	-0.304517	0.043	0.112	0.136146
Cspg4	6.09927e-05	-0.218772	0.1	0.203	0.138514
Apoc1	6.29449e-05	-0.329648	0.029	0.087	0.142948
Arhgap17	6.388e-05	-0.17672	0.082	0.175	0.145072
Acadsb	6.46522e-05	-0.0953904	0.093	0.192	0.146825
Itch	6.65165e-05	-0.24389	0.043	0.112	0.151059
Ppp1r15a	6.75414e-05	-0.0521476	0.222	0.385	0.153387
Zfand6	6.75736e-05	-0.240509	0.043	0.112	0.15346
Arhgdib	6.87244e-05	-0.155339	0.065	0.147	0.156073
Fus	6.87247e-05	-0.152468	0.221	0.371	0.156074
Itga9	6.93871e-05	-0.225138	0.065	0.147	0.157578
Canx	7.04908e-05	-0.125996	0.332	0.538	0.160084
Adgrb1	7.08941e-05	-0.185955	0.273	0.448	0.161001
Atxn7l3	7.11318e-05	-0.296583	0.109	0.213	0.16154
Fyco1	7.20329e-05	-0.181931	0.14	0.259	0.163587
Ylpm1	7.6881e-05	-0.42229	0.042	0.108	0.174597
Dnaja1	7.78286e-05	-0.267881	0.166	0.287	0.176749
Phf3	7.83595e-05	-0.0217706	0.091	0.189	0.177954
Rasgef1b	7.85513e-05	-0.2581	0.084	0.175	0.17839
Rabgap1l	7.86216e-05	-0.197694	0.067	0.15	0.17855
Ppp3ca	7.90203e-05	-0.0315474	0.065	0.147	0.179455
Mrps15	7.91974e-05	-0.479491	0.038	0.101	0.179857
AC149090.1	7.92189e-05	-0.165579	0.118	0.227	0.179906
Pnpla8	8.123e-05	-0.177697	0.039	0.105	0.184473
Psma6	8.21278e-05	-0.527694	0.056	0.129	0.186512
Stk38	8.22328e-05	-0.52449	0.038	0.101	0.186751
Ogfrl1	8.39244e-05	-0.169884	0.1	0.199	0.190592
Ncstn	8.47829e-05	-0.0111883	0.213	0.367	0.192542
Usp12	8.68595e-05	-0.158775	0.046	0.115	0.197258
Ppia	8.78791e-05	-0.152521	0.206	0.336	0.199573
Gabarap	8.86654e-05	-0.152948	0.09	0.185	0.201359
Stx7	9.01525e-05	-0.0899626	0.09	0.185	0.204736
Sh3bgrl3	9.15907e-05	-0.2355	0.077	0.164	0.208003
Zfp91	9.16654e-05	-0.22683	0.091	0.185	0.208172
Acvrl1	9.42187e-05	-0.143954	0.036	0.098	0.213971
Nr3c1	9.59819e-05	-0.191085	0.164	0.29	0.217975
Idh3b	9.70427e-05	0.184232	0.113	0.224	0.220384
Slc2a5	9.83976e-05	-0.124203	0.246	0.406	0.223461
Dnajc8	9.85869e-05	-0.864691	0.044	0.108	0.223891
Rps3a1	9.91695e-05	-0.0827049	0.235	0.378	0.225214
Akap9	0.00010017	-0.262801	0.118	0.224	0.227485
Acap2	0.000100371	-0.392411	0.1	0.196	0.227943
Gpbp1	0.000102448	-0.142693	0.06	0.136	0.232659
Bap1	0.000104015	-0.0611597	0.198	0.343	0.236217
Chmp3	0.000105799	-0.156287	0.042	0.108	0.24027
Hsd17b4	0.000107303	-0.195941	0.081	0.171	0.243684
Rac1	0.000108193	0.0161717	0.165	0.301	0.245706
Ociad1	0.000110355	-0.0259051	0.108	0.213	0.250617
Srsf11	0.00011234	-0.0913007	0.159	0.283	0.255125
Arhgap27	0.000114288	-0.451363	0.049	0.119	0.259548
Gip	0.000114709	-0.172946	0.131	0.241	0.260503
Erbin	0.000114974	-0.29829	0.09	0.182	0.261105
Mlph	0.000116999	-0.270167	0.062	0.14	0.265704
Suz12	0.000119365	-0.14831	0.034	0.094	0.271079
Dnajb6	0.000119967	-0.22733	0.077	0.161	0.272446
Cpeb3	0.000120077	0.0151217	0.118	0.227	0.272695
Taf1d	0.000120248	-0.219016	0.081	0.168	0.273083
Pnpt1	0.00012025	-0.268593	0.093	0.185	0.273088
Tnfrsf21	0.000121783	-0.228601	0.08	0.168	0.276569
Nfkbia	0.000122138	-0.27944	0.261	0.416	0.277375
Mog	0.000122279	-0.0781725	0.174	0.308	0.277697
Nanp	0.000122716	-0.135949	0.077	0.164	0.278689
Lipa	0.000124328	-0.0345464	0.06	0.136	0.282348
Pcnp	0.000125483	-0.152629	0.047	0.115	0.284971
Srsf5	0.000126252	-0.136573	0.179	0.311	0.286719
Rtl4	0.000126604	-0.409409	0.126	0.231	0.287517
Rpl31	0.000126691	-0.358279	0.178	0.294	0.287714
Ywhae	0.000127735	-0.154962	0.239	0.392	0.290087
Rpl30	0.000128049	-0.0130854	0.225	0.357	0.290799
Casp8ap2	0.000129014	-0.38423	0.037	0.098	0.292992
Ccin	0.000129241	-0.151639	0.137	0.252	0.293507
Tsc22d2	0.000131007	-0.540205	0.033	0.091	0.297517
Lactb	0.00013229	-0.144469	0.047	0.115	0.300431
Ppp2r5a	0.000133532	-0.311621	0.052	0.122	0.30325
Lpcat3	0.000137047	-0.0616086	0.069	0.15	0.311234
Wdfy2	0.000137474	-0.309696	0.061	0.136	0.312203
Myo1e	0.000138265	-0.225946	0.385	0.591	0.314
Btk	0.000138509	-0.209361	0.043	0.108	0.314553
Cygb	0.000139625	0.0412034	0.133	0.248	0.317088
Hnrnpl	0.000141055	-0.14486	0.155	0.276	0.320336
Riok3	0.000141894	-0.526422	0.051	0.119	0.322242
Map11	0.00014216	-0.165859	0.076	0.161	0.322846
Rbm39	0.00014232	-0.129319	0.329	0.51	0.323208
Grcc10	0.000142446	-0.200987	0.046	0.112	0.323495
Il6st	0.000142794	-0.102253	0.154	0.276	0.324285
Nsfl1c	0.000143295	-0.232261	0.039	0.101	0.325423
Pmis2	0.000145032	-0.255707	0.033	0.091	0.329367
Copa	0.000145598	-0.0294382	0.154	0.28	0.330652
Thoc2	0.000146537	-0.262776	0.07	0.15	0.332786
Kansl1	0.000148211	-0.349368	0.066	0.143	0.336587
Fggy	0.000149139	-0.326001	0.773	0.902	0.338695
Lingo1	0.000150968	-0.20812	0.109	0.21	0.342848
Syce3	0.000153027	-0.187734	0.117	0.22	0.347525
Zbtb18	0.000153535	-0.224517	0.07	0.15	0.348677
Nuak1	0.000153613	-0.182569	0.124	0.231	0.348856
Mmd	0.000155534	-0.0370666	0.049	0.119	0.353218
Spty2d1	0.000156461	-0.0692363	0.08	0.168	0.355323
Sla	0.00015775	0.096028	0.107	0.21	0.358251
Rapgef5	0.000158215	-0.169433	0.151	0.269	0.359307
Ints6	0.000159833	-0.194617	0.147	0.262	0.362981
Gng4	0.000160014	-0.38233	0.057	0.129	0.363393
Kdm6b	0.00016039	-0.0700078	0.053	0.126	0.364245
Lao1	0.000160461	-0.195369	0.091	0.182	0.364407
Uba5	0.000162732	-0.138575	0.052	0.122	0.369564
Fbll1	0.000163632	0.031996	0.082	0.171	0.371608
Luc7l3	0.000164039	-0.126028	0.067	0.147	0.372532
Yes1	0.000166562	-0.109247	0.127	0.234	0.378262
Mef2c	0.000167065	-0.172506	0.293	0.458	0.379406
Alox5ap	0.000171823	0.139026	0.108	0.21	0.39021
Vav1	0.000173697	-0.0502045	0.194	0.332	0.394466
Ncbp3	0.000174009	-0.358816	0.042	0.105	0.395173
Slc11a1	0.000174172	-0.154374	0.114	0.217	0.395545
Swap70	0.000175436	-0.0481707	0.061	0.136	0.398415
Scgb3a2	0.000181468	-0.00672814	0.183	0.318	0.412115
Pcbp1	0.000183283	0.00339498	0.099	0.196	0.416236
Srsf6	0.000184188	-0.138711	0.105	0.203	0.418291
Id2	0.000184237	-0.260248	0.057	0.129	0.418401
Akirin2	0.000185307	-0.0468473	0.052	0.122	0.420831
Rapgef6	0.00018601	-0.232917	0.063	0.14	0.422428
Tenm3	0.000189824	-0.151719	0.128	0.234	0.431091
Xiap	0.000193572	-0.167195	0.042	0.105	0.439603
Ankrd17	0.000193715	-0.265897	0.069	0.147	0.439926
2610507B11Rik	0.000196187	-0.366454	0.053	0.122	0.445542
Cpz	0.000200278	-0.166669	0.145	0.259	0.454832
Cdk11b	0.000203056	-0.171629	0.085	0.171	0.461139
Tm9sf3	0.000203317	-0.0958654	0.14	0.252	0.461733
Rpl37a	0.000204109	-0.28536	0.065	0.14	0.463531
Kmt2c	0.00020437	-0.195999	0.099	0.192	0.464124
Apcs	0.000204378	-0.298417	0.095	0.185	0.464141
Mat2a	0.000205941	-0.178303	0.212	0.35	0.467691
Tpst1	0.000206377	-0.152178	0.423	0.598	0.468682
T2	0.000207342	0.0119752	0.225	0.371	0.470874
Fhod1	0.000208387	-0.359919	0.049	0.115	0.473247
Rpl7a	0.000211184	-0.368552	0.18	0.287	0.479599
Csnk1a1	0.000211806	-0.075911	0.148	0.266	0.481011
Mark3	0.000212672	-0.221809	0.051	0.119	0.482978
Aftph	0.000213917	-0.040243	0.121	0.227	0.485806
Dnajb14	0.000217538	-0.264926	0.056	0.126	0.494029
Plcb3	0.000218896	-0.0881287	0.104	0.199	0.497113
Tnnc2	0.000221851	-0.131527	0.152	0.269	0.503824
Snrpn	0.000222617	-0.137382	0.071	0.15	0.505563
Inpp4b	0.000223301	-0.323615	0.047	0.112	0.507116
Cpt1b	0.000223872	0.0333785	0.123	0.231	0.508414
Slc39a7	0.00022854	-0.213635	0.1	0.192	0.519014
Sfpq	0.000232009	-0.0608934	0.231	0.381	0.526894
Wdr26	0.000236663	-0.134061	0.141	0.252	0.537462
Lonp1	0.000239458	-0.284016	0.047	0.112	0.543809
Zfp638	0.000240906	0.0175324	0.151	0.269	0.547097
Nckap1l	0.000242326	-0.0148066	0.155	0.276	0.550321
Numbl	0.000243984	0.00660642	0.051	0.119	0.554087
Nxf1	0.000244389	-0.337608	0.049	0.115	0.555007
Zfp90	0.000245124	-0.181896	0.098	0.189	0.556676
Sec62	0.000248379	-0.0167899	0.105	0.203	0.564069
Cdk9	0.000249483	-0.0973344	0.067	0.143	0.566575
Eif4g1	0.000255327	-0.000519495	0.121	0.224	0.579847
Mxd4	0.000256498	-0.183485	0.056	0.126	0.582507
Usp24	0.000257752	-0.138586	0.065	0.14	0.585354
Nlrp1b	0.000260577	0.159763	0.204	0.35	0.591769
Ik	0.000263238	-0.206446	0.181	0.308	0.597813
Herc1	0.000265952	0.0839831	0.109	0.21	0.603977
Tnrc18	0.000266452	-0.177344	0.056	0.126	0.605113
Sbno2	0.000268458	-0.0461184	0.076	0.157	0.609667
Eif5	0.000268518	-0.180578	0.374	0.559	0.609804
Cntrob	0.00027024	-0.201144	0.143	0.255	0.613716
Cab39	0.000271175	-0.18629	0.076	0.157	0.615838
Tmem131	0.000275653	-0.209019	0.061	0.133	0.626009
Pygb	0.000275925	-0.0050274	0.228	0.378	0.626625
Uqcrc2	0.000277842	-0.337762	0.039	0.098	0.630979
Ssh2	0.000279053	-0.244757	0.268	0.42	0.633729
Ptafr	0.000280043	0.160292	0.084	0.171	0.635978
Aebp2	0.000283801	-0.386174	0.046	0.108	0.644512
Amigo2	0.000286345	-0.0610461	0.08	0.164	0.65029
Dnajb4	0.000286413	0.108553	0.084	0.171	0.650444
Diaph2	0.00028883	-0.249691	0.075	0.154	0.655933
Urm1	0.000292804	-0.326844	0.066	0.14	0.664958
Clip1	0.000296857	-0.287753	0.102	0.192	0.674163
Atp5l	0.000297749	0.00722152	0.123	0.227	0.676188
Rap2a	0.000301218	-0.288711	0.07	0.147	0.684066
Dclk2	0.000301585	-0.164728	0.145	0.255	0.6849
Kat6a	0.000309724	-0.0511239	0.107	0.203	0.703382
Ccr5	0.000310707	-0.228765	0.194	0.318	0.705616
Phactr2	0.000311474	-0.433425	0.036	0.091	0.707357
Cd14	0.000320767	-0.295341	0.094	0.178	0.728462
Cpne1	0.000321303	-0.138201	0.22	0.36	0.729679
Rassf2	0.000326732	-0.0516732	0.093	0.182	0.742008
Rps15a	0.000328144	-0.175253	0.057	0.126	0.745215
Derl1	0.000332444	0.0905156	0.184	0.318	0.754979
Hnrnpc	0.000333065	0.0944233	0.107	0.203	0.75639
Ubash3b	0.000347928	-0.247465	0.113	0.206	0.790144
Rpl7l1	0.000353123	-0.0547098	0.046	0.108	0.801943
Ythdf2	0.000353726	0.154959	0.074	0.154	0.803311
Xrn1	0.000361361	-0.250174	0.051	0.115	0.82065
Eed	0.000364165	-0.237561	0.065	0.136	0.827019
Tjp1	0.000368276	-0.24662	0.105	0.196	0.836355
Pttg1ip	0.000370138	-0.229601	0.071	0.147	0.840583
Dnajc7	0.000370438	-0.105317	0.128	0.231	0.841264
Donson	0.000371849	-0.0354929	0.103	0.196	0.844469
Fkbp15	0.000372409	-0.000562538	0.075	0.154	0.845742
Ptpn6	0.000380902	-0.143112	0.212	0.346	0.865029
Syk	0.000380981	-0.103245	0.23	0.378	0.865209
Knop1	0.000381532	-0.18028	0.136	0.238	0.866458
Fam102b	0.000382115	-0.0504993	0.218	0.364	0.867784
Ehmt2	0.000384976	-0.270094	0.044	0.105	0.874281
Snrnp70	0.000391298	-0.132175	0.275	0.434	0.888639
Hnrnpf	0.000395705	-0.278071	0.105	0.192	0.898647
Znf41-ps	0.000395978	-0.0478235	0.053	0.119	0.899265
Bzw1	0.000397231	0.00974657	0.084	0.168	0.902112
Csta1	0.000400956	-0.236497	0.067	0.14	0.910572
Atp6ap2	0.000403263	0.0254011	0.081	0.164	0.915811
Fam91a1	0.00040364	-0.151224	0.129	0.231	0.916666
Vapa	0.00041049	-0.089176	0.042	0.101	0.932223
Rab8b	0.000411701	-0.109121	0.069	0.143	0.934974
Tent5c	0.000417117	-0.266473	0.081	0.161	0.947273
Smarcc1	0.000420599	-0.277036	0.047	0.108	0.955181
Rab5c	0.000429149	-0.318001	0.034	0.087	0.974598
Sned1	0.00042938	0.00411013	0.107	0.199	0.975121
Man1a	0.000431051	0.0138306	0.085	0.168	0.978917
Fbxo3	0.000431623	0.0420494	0.204	0.343	0.980216
Cxxc5	0.000435726	-0.258933	0.104	0.192	0.989533
Wdr33	0.000436037	-0.256725	0.038	0.094	0.99024
Ccnyl1	0.000438728	-0.169032	0.378	0.566	0.996351
Dnajc13	0.000441047	-0.302498	0.058	0.126	1
Oas1b	0.00044182	-0.0995043	0.051	0.115	1
Mlc1	0.000445792	-0.0816412	0.272	0.437	1
Hnrnpab	0.000445831	-0.284289	0.136	0.238	1
Atxn2l	0.000449993	-0.221872	0.047	0.108	1
Hmgcll1	0.000454252	0.0464605	0.104	0.196	1
Ncl	0.00045478	-0.154439	0.282	0.441	1
Dlgap4	0.000460114	0.0997669	0.042	0.101	1
Dapp1	0.0004605	-0.152655	0.1	0.189	1
Cttnbp2	0.000460886	-0.2177	0.19	0.308	1
Gfy	0.000463236	-0.223462	0.072	0.147	1
Herpud1	0.000463554	-0.0435488	0.115	0.213	1
Pde6g	0.000472818	-0.1999	0.041	0.098	1
Zbtb7a	0.000473785	-0.135626	0.098	0.185	1
Tcp1	0.00047748	-0.184565	0.056	0.122	1
Puf60	0.000482222	-0.519795	0.039	0.094	1
Ttc3	0.000487311	-0.040228	0.058	0.126	1
Rhoh	0.000487718	-0.185721	0.072	0.147	1
Leprotl1	0.000494846	-0.331682	0.043	0.101	1
Zzef1	0.000495025	-0.492041	0.037	0.091	1
Mbnl2	0.00049544	0.0793773	0.202	0.339	1
Trpv2	0.00050218	-0.302906	0.034	0.087	1
Sptlc2	0.000504549	-0.186115	0.056	0.122	1
Ddrgk1	0.000510179	-0.150297	0.076	0.154	1
Rpl13a	0.000512114	-0.108751	0.316	0.479	1
Rsl1d1	0.000515142	-0.0755714	0.07	0.143	1
Dynlrb2	0.000524851	-0.207727	0.041	0.098	1
Morf4l2	0.00052754	-0.182689	0.058	0.126	1
Selenof	0.000539959	-0.0645429	0.065	0.136	1
Fuca1	0.000540173	-0.234352	0.09	0.171	1
Anp32a	0.000542085	-0.31019	0.066	0.136	1
Trim26	0.000546847	-0.126993	0.056	0.122	1
Gna13	0.000549279	0.0695006	0.088	0.171	1
Rasal3	0.000561018	-0.181502	0.168	0.28	1
Ogfr	0.000561707	-0.238447	0.046	0.105	1
Vcp	0.000563894	-0.250424	0.179	0.29	1
Lcorl	0.000570666	-0.155489	0.061	0.129	1
Mia3	0.000572144	-0.180502	0.104	0.192	1
Spi1	0.000584455	-0.210578	0.104	0.192	1
Sema4d	0.000584918	0.0117374	0.079	0.157	1
Sox18	0.000586208	0.154699	0.154	0.269	1
Astn1	0.000586461	-0.0327085	0.098	0.185	1
Ecel1	0.000589553	-0.116812	0.123	0.217	1
Scaf11	0.000591929	-0.0909684	0.169	0.283	1
Rgma	0.000597265	-0.0874273	0.199	0.329	1
Chd6	0.000600739	-0.190215	0.055	0.119	1
Atf3	0.000601523	-0.415911	0.199	0.311	1
Txlna	0.000601842	-0.218748	0.055	0.119	1
Oxct1	0.000606522	-0.0964383	0.15	0.255	1
Zfp991	0.000622286	-0.0204328	0.074	0.147	1
Rab1a	0.000624612	-0.159117	0.077	0.154	1
Arid4b	0.000626207	0.0204058	0.072	0.147	1
Naa50	0.000627729	-0.0273301	0.037	0.091	1
Smap1	0.000636338	-0.298604	0.048	0.108	1
Maf1	0.000636627	-0.213374	0.071	0.143	1
Sun2	0.000649931	0.11268	0.152	0.266	1
Sp6	0.00065726	-0.0435578	0.117	0.213	1
Nfkb1	0.000664205	-0.168033	0.095	0.178	1
Actn4	0.000666721	-0.348095	0.051	0.112	1
Rbp4	0.000667722	-0.0327029	0.307	0.479	1
Rtn3	0.000672974	-0.051578	0.095	0.178	1
Zmynd11	0.000679056	-0.181798	0.089	0.168	1
Plxnb2	0.000683218	-0.0800398	0.204	0.332	1
Brd3os	0.000683572	-0.179606	0.033	0.084	1
Rpl34	0.000686588	-0.0837889	0.094	0.175	1
Rpl32	0.000693287	0.0383418	0.109	0.199	1
Taok3	0.000695672	0.159747	0.063	0.133	1
Tnpo3	0.000703119	0.0158748	0.352	0.535	1
Cldn8	0.000704496	-0.0268468	0.102	0.189	1
Traf3ip3	0.000706769	-0.112627	0.033	0.084	1
Tnfrsf1b	0.000711371	-0.272477	0.07	0.14	1
Prdm2	0.000713827	-0.182665	0.076	0.15	1
Klk8	0.000715657	-0.0171127	0.055	0.119	1
Glmp	0.000716201	-0.132187	0.074	0.147	1
Pik3cb	0.000722661	-0.128308	0.121	0.213	1
Dlg2	0.000731856	0.0394078	0.184	0.308	1
Gapvd1	0.000736455	-0.237774	0.11	0.196	1
Abca9	0.000744663	-0.0341987	0.254	0.399	1
Bmpr2	0.000746453	-0.270412	0.067	0.136	1
Mecp2	0.000751221	-0.0888372	0.294	0.462	1
Akr1b10	0.000752934	-0.186276	0.051	0.112	1
Exoc5	0.000756174	-0.0207541	0.088	0.168	1
Kcnk6	0.000757732	-0.00335375	0.126	0.224	1
Hspa4	0.000759288	-0.0517548	0.09	0.171	1
Frmd4a	0.000763565	-0.218397	0.242	0.378	1
Psmd12	0.000765311	0.0143374	0.066	0.136	1
Abca1	0.000765552	-0.167057	0.175	0.29	1
Invs	0.000768955	-0.22972	0.044	0.101	1
Hnrnpa0	0.000771136	-0.105867	0.06	0.126	1
Rps6ka1	0.000774396	-0.02303	0.131	0.231	1
Rpl12	0.000780409	-0.0692398	0.371	0.514	1
Ndel1	0.000781806	0.0671832	0.16	0.273	1
Il4ra	0.000784671	-0.136431	0.06	0.126	1
Samm50	0.000786205	-0.125611	0.042	0.098	1
Ctc1	0.000787851	-0.208681	0.065	0.133	1
Akr1a1	0.000788623	-0.0716039	0.123	0.217	1
Cenpx	0.000790675	0.0709704	0.062	0.129	1
Bet1l	0.000791018	-0.0982855	0.156	0.266	1
Nolc1	0.000795079	-0.194989	0.075	0.147	1
Phf20	0.000795477	-0.493486	0.032	0.08	1
Ppp1r21	0.000797872	-0.113159	0.053	0.115	1
Tmco1	0.000801559	-0.0979111	0.062	0.129	1
Eif3f	0.00080303	-0.168794	0.067	0.136	1
Alx1	0.00080663	-0.27951	0.053	0.115	1
Mia2	0.000807596	0.0156999	0.095	0.178	1
Mks1	0.000808019	-0.133873	0.051	0.112	1
Gkn3	0.000808959	-0.00365896	0.071	0.143	1
Irak1	0.000820942	-0.0909491	0.062	0.129	1
Gna15	0.000823996	-0.141044	0.131	0.227	1
Pcf11	0.000829535	-0.0738364	0.151	0.259	1
Bptf	0.000835373	0.036868	0.148	0.255	1
Ssr4	0.000838685	0.00159933	0.048	0.108	1
Ets1	0.000840596	-0.0789019	0.118	0.21	1
Slc16a6	0.00084223	-0.0937437	0.141	0.241	1
Net1	0.000843194	-0.0912402	0.079	0.154	1
Atf6	0.000845808	-0.0943572	0.079	0.154	1
Eif3a	0.000849078	0.0109563	0.179	0.297	1
Tfr2	0.000853124	-0.0399423	0.176	0.294	1
Tnpo1	0.000879526	-0.0850699	0.266	0.413	1
Ybx1	0.000884111	0.0903033	0.164	0.28	1
Wdr89	0.000890901	-0.0913536	0.08	0.154	1
Scarb2	0.000894379	-0.0334312	0.165	0.276	1
Atl3	0.000896808	0.0645934	0.076	0.15	1
Sipa1	0.000899019	-0.121256	0.201	0.318	1
Bach1	0.000902343	-0.194745	0.096	0.178	1
Smc6	0.000909148	-0.303278	0.066	0.133	1
Pip4p1	0.000913064	-0.362403	0.071	0.14	1
Acsm4	0.000914698	-0.0419455	0.095	0.178	1
Phyhd1	0.000916199	-0.18207	0.138	0.238	1
Kdm2a	0.000924023	-0.0979039	0.047	0.105	1
Chd4	0.000930627	-0.125305	0.242	0.381	1
Aspg	0.000934031	-0.214866	0.127	0.22	1
Phip	0.000938436	-0.0997525	0.124	0.217	1
Spop	0.000940862	-0.101932	0.058	0.122	1
Capza2	0.000941576	0.0544768	0.258	0.409	1
Fnbp4	0.000953282	0.0115988	0.093	0.175	1
Klf3	0.000958984	-0.172495	0.058	0.122	1
Actr3b	0.00096729	-0.0121591	0.128	0.224	1
Nufip2	0.000968626	-0.241377	0.063	0.129	1
Snap25	0.000976302	-0.11008	0.038	0.091	1
Etf1	0.000977662	-0.293189	0.057	0.119	1
Hspa5	0.000990472	-0.244329	0.711	0.836	1
Luc7l2	0.000990571	-0.19014	0.157	0.262	1
Itpr2	0.00100966	-0.00230948	0.201	0.329	1
Noc2l	0.00101246	-0.303922	0.057	0.119	1
Pabpc1	0.00101541	0.02029	0.307	0.483	1
Jak1	0.00102352	-0.0504368	0.17	0.287	1
Abi3	0.00102414	-0.0914202	0.162	0.269	1
Tmem234	0.00102701	-0.224815	0.063	0.129	1
Wnk1	0.00104179	-0.0766541	0.213	0.346	1
Rnls	0.00104313	0.0086711	0.169	0.283	1
Osbpl11	0.00104642	-0.0589199	0.088	0.164	1
Ndfip1	0.00105209	-0.0391616	0.08	0.154	1
Nbeal2	0.00106446	-0.0772468	0.085	0.161	1
Baz1b	0.00107198	-0.116893	0.109	0.196	1
Rbm19	0.00107447	0.107236	0.049	0.108	1
Zfhx3	0.0010825	0.108729	0.244	0.395	1
Mertk	0.00109202	-0.110387	0.312	0.479	1
I830077J02Rik	0.00109332	-0.162157	0.052	0.112	1
Rplp2	0.00109491	0.01065	0.137	0.234	1
Hnrnpd	0.00109941	-0.0748242	0.253	0.395	1
Rps11	0.00110796	-0.0353413	0.298	0.434	1
Dcst2	0.00111263	-0.0492435	0.049	0.108	1
Tmem30a	0.00111662	0.00731747	0.11	0.199	1
Cst6	0.0011255	-0.163172	0.31	0.462	1
Metap2	0.00113039	-0.0621088	0.093	0.171	1
Chd9	0.00113102	0.115344	0.203	0.329	1
Clec2g	0.00113271	0.18615	0.162	0.276	1
G3bp2	0.00113904	-0.223182	0.099	0.178	1
Lair1	0.00114162	-0.0897236	0.236	0.367	1
Sh2b3	0.00114524	-0.0994507	0.082	0.157	1
Dusp11	0.0011622	-0.115953	0.052	0.112	1
Dock4	0.00116291	-0.0616101	0.095	0.175	1
Gtf2f1	0.00116412	-0.177955	0.046	0.101	1
Ncf2	0.00116906	0.0706366	0.151	0.259	1
Gramd1a	0.00117243	-0.443214	0.058	0.119	1
Abcd2	0.00117571	-0.0501176	0.069	0.136	1
Rack1	0.00118903	0.114524	0.209	0.346	1
Npc2	0.00119095	-0.00254354	0.266	0.416	1
Zfp148	0.00119267	-0.351215	0.067	0.133	1
Rpl29	0.00119788	0.0104296	0.171	0.276	1
Lyst	0.00120982	-0.251726	0.048	0.105	1
Helz	0.00121603	-0.0763254	0.043	0.098	1
Ppp4r3b	0.00124701	-0.402098	0.058	0.119	1
Stk17b	0.00127274	-0.0993318	0.037	0.087	1
Taf1b	0.00127861	-0.196882	0.048	0.105	1
Pnrc2	0.0012793	-0.0162956	0.06	0.122	1
Zdhhc20	0.00128052	-0.151915	0.084	0.157	1
Tlr13	0.00130214	0.0109599	0.069	0.136	1
Per2	0.0013199	-0.0571648	0.118	0.206	1
Arl8b	0.00132319	-0.282437	0.075	0.143	1
Engase	0.00132464	-0.108267	0.141	0.238	1
Ier3ip1	0.0013265	-0.107204	0.039	0.091	1
Fchsd2	0.00135915	0.030942	0.069	0.136	1
Bin2	0.00137139	0.0494252	0.278	0.437	1
Ubap2	0.00137172	-0.0977427	0.067	0.133	1
Apoh	0.0014057	-0.0417387	0.171	0.28	1
Rnf169	0.00140576	-0.137601	0.042	0.094	1
Hps4	0.00141814	-0.0455726	0.081	0.154	1
Bcap31	0.00143353	-0.287371	0.058	0.119	1
Ptp4a2	0.00143517	-0.0168547	0.227	0.364	1
Fbxw11	0.00143526	-0.214314	0.051	0.108	1
Smc1a	0.00144224	-0.0886641	0.089	0.164	1
Gigyf2	0.00144556	-0.148152	0.051	0.108	1
Ankhd1	0.00144772	-0.0925234	0.081	0.154	1
Csnk2a2	0.0014481	-0.297825	0.036	0.084	1
Ptbp1	0.00145108	0.0795473	0.254	0.406	1
Eprs	0.00146534	-0.245426	0.08	0.15	1
Tram2	0.00148284	0.00333814	0.189	0.301	1
Lst1	0.00148362	-0.12398	0.07	0.136	1
Gpi1	0.00148463	-0.0322904	0.065	0.129	1
Rhog	0.00148601	-0.198467	0.513	0.699	1
Serinc3	0.00150029	-0.145256	0.495	0.682	1
Rbp7	0.00151617	-0.0476665	0.343	0.49	1
Ikzf1	0.00153627	0.114398	0.189	0.308	1
Nfam1	0.00153652	0.0285507	0.119	0.21	1
Cndp2	0.00153705	0.165703	0.085	0.161	1
Arhgap5	0.00154087	-0.0593483	0.329	0.497	1
Capza1	0.00154319	-0.0154117	0.067	0.133	1
Zmiz1	0.00155308	-0.0514882	0.126	0.217	1
Ddx5	0.00155634	-0.162268	0.471	0.654	1
Rpl24	0.00156401	-0.055427	0.274	0.406	1
Anxa3	0.00156406	0.0969473	0.171	0.287	1
Rbm25	0.00156707	0.0406363	0.179	0.294	1
Asah1	0.00158262	0.00833949	0.1	0.182	1
Zc3h11a	0.00161138	-0.0998575	0.184	0.294	1
Irf5	0.00161186	-0.0201004	0.084	0.157	1
Kif1b	0.00162089	-0.113963	0.056	0.115	1
Arpc1b	0.00163989	-0.0272715	0.171	0.283	1
Tpm3-rs7	0.00164033	-0.0685401	0.147	0.245	1
Dgkz	0.00164164	-0.290156	0.038	0.087	1
Tbc1d9b	0.00166201	0.0564847	0.121	0.21	1
Hck	0.00166385	-0.0566129	0.096	0.175	1
Brpf1	0.00168287	-0.0298272	0.075	0.143	1
Csk	0.00168463	-0.135416	0.317	0.462	1
Acox3	0.00169635	-0.0040478	0.053	0.112	1
Ifnar1	0.00169951	-0.333027	0.052	0.108	1
Naa15	0.00170101	-0.123869	0.085	0.157	1
Abcf1	0.00170182	-0.0336127	0.067	0.133	1
Ypel3	0.00170224	-0.156502	0.093	0.168	1
Srp72	0.00170528	-0.111535	0.1	0.178	1
Exoc3l	0.00170565	-0.113568	0.077	0.147	1
Tpt1-ps3	0.00171785	0.94786	0.127	0.063	1
Rab3gap1	0.00171969	-0.234242	0.047	0.101	1
Ppp4r3a	0.00172276	-0.049832	0.07	0.136	1
Scamp2	0.00172367	-0.057647	0.279	0.423	1
Alg2	0.00173297	0.0225465	0.192	0.308	1
Eif1b	0.00173481	0.0237925	0.206	0.325	1
Cat	0.00174179	-0.281074	0.041	0.091	1
Gxylt1	0.00175606	-0.0753035	0.058	0.119	1
Marcks	0.00176144	-0.117948	0.463	0.636	1
Mill1	0.00177051	-0.0702057	0.047	0.101	1
Baz2b	0.00177265	-0.09723	0.09	0.164	1
Arpc4	0.00177739	-0.00292226	0.133	0.224	1
Ube2i	0.00179794	-0.0241165	0.063	0.126	1
Psmb3	0.00179882	-0.181875	0.112	0.192	1
Gcn1l1	0.00180252	-0.272894	0.06	0.119	1
Zc3h18	0.00180354	-0.214305	0.052	0.108	1
Npm1	0.00180985	-0.0523536	0.127	0.213	1
Rac2	0.00181346	-0.251424	0.032	0.077	1
Pafah1b1	0.0018322	0.116705	0.122	0.213	1
Rpl35a	0.0018448	-0.00953979	0.129	0.217	1
Casp8	0.00185062	-0.0374838	0.063	0.126	1
Prex1	0.00185666	-0.122672	0.187	0.297	1
Itsn1	0.00186293	-0.107339	0.199	0.315	1
Retreg1	0.00188351	-0.148611	0.112	0.192	1
Bean1	0.00188458	-0.153695	0.074	0.14	1
Arap3	0.00188489	-0.0935387	0.093	0.168	1
Slc12a2	0.00188646	-0.149537	0.147	0.241	1
Pdcd4	0.00189487	0.272167	0.042	0.094	1
Cln8	0.00190335	-0.0170187	0.08	0.15	1
Neurl3	0.00190653	-0.0341009	0.072	0.14	1
Usp47	0.00191611	-0.299653	0.043	0.094	1
Exosc4	0.00194685	-0.109917	0.052	0.108	1
Vps37b	0.00195023	-0.0647646	0.052	0.108	1
Gulo	0.00196234	-0.164482	0.434	0.615	1
Setd5	0.00200998	-0.379161	0.065	0.126	1
Arhgef2	0.00202644	0.0089623	0.096	0.175	1
Gpr155	0.00203014	-0.0865572	0.063	0.126	1
Zfand5	0.00203188	-0.0572497	0.263	0.399	1
Tut4	0.00203259	-0.170928	0.067	0.129	1
Phf20l1	0.00205161	-0.053675	0.093	0.168	1
Nop56	0.0020553	-0.0551302	0.145	0.238	1
Plxdc2	0.00205581	-0.059914	0.435	0.629	1
Ptma	0.00207912	-0.104728	0.376	0.535	1
Fnbp1l	0.00208284	0.0779342	0.094	0.171	1
Tomm20l	0.00208375	-0.404373	0.039	0.087	1
Ncor1	0.00208376	-0.0793796	0.135	0.227	1
Fsip1	0.00208706	-0.14051	0.067	0.129	1
Per1	0.00208767	0.0719109	0.251	0.392	1
Fbrs	0.002099	-0.0201486	0.121	0.206	1
Atp1b3	0.00210412	-0.218802	0.115	0.196	1
Arhgef6	0.00210616	-0.240669	0.048	0.101	1
Trim8	0.00211156	0.00617664	0.061	0.122	1
Tmem173	0.00211267	-0.143704	0.118	0.203	1
Setd3	0.00213009	-0.361092	0.061	0.119	1
Terf2	0.00213466	-0.114104	0.041	0.091	1
Ap4e1	0.0021391	-0.282708	0.037	0.084	1
Stub1	0.00214313	-0.140859	0.043	0.094	1
Surf4	0.00217261	-0.173802	0.06	0.119	1
Rtel1	0.00218377	-0.090484	0.046	0.098	1
Plagl1	0.00219759	0.0810074	0.194	0.315	1
Appl2	0.00220171	-0.0220244	0.105	0.185	1
Stk10	0.00220756	-0.160901	0.084	0.154	1
Gns	0.00221023	0.0545327	0.327	0.507	1
Mid1ip1	0.00222824	-0.0713406	0.043	0.094	1
Plcb1	0.00222855	0.0813399	0.204	0.329	1
Xrn2	0.00223072	-0.11009	0.079	0.147	1
Zfp652	0.00225299	-0.228202	0.082	0.15	1
Casp3	0.00226461	0.0845284	0.16	0.266	1
Mcfd2	0.00226838	-0.224284	0.062	0.122	1
Tex261	0.0022763	-0.127211	0.065	0.126	1
Phf14	0.00228071	0.127245	0.136	0.231	1
Lrch1	0.00229092	-0.0924185	0.043	0.094	1
Itpripl1	0.00229223	-0.0403909	0.057	0.115	1
Adam10	0.00229863	0.211301	0.178	0.294	1
Cyfip1	0.00230227	-0.0805198	0.365	0.528	1
Cntd1	0.00231721	-0.141541	0.077	0.143	1
Sema3e	0.00231931	-0.144245	0.072	0.136	1
Tma7	0.00231989	-0.209626	0.037	0.084	1
Tuba1b	0.00233808	-0.0858629	0.283	0.395	1
Prkar1a	0.0023429	0.0687811	0.093	0.168	1
Il16	0.00236483	-0.00550811	0.074	0.14	1
Brsk1	0.00236635	-0.165548	0.075	0.14	1
Skap2	0.00237051	-0.0209129	0.081	0.15	1
Rasgrp3	0.00237413	-0.0597055	0.175	0.283	1
Stab2	0.00238556	-0.218438	0.077	0.143	1
Srsf3	0.00240428	0.134817	0.194	0.311	1
Ramp2	0.00242143	-0.124319	0.18	0.287	1
Myh9	0.00242626	-0.0215342	0.24	0.367	1
Lsm4	0.00242813	0.0452393	0.055	0.112	1
Dnmt3a	0.00243312	0.0211688	0.104	0.182	1
Rcsd1	0.00243641	-0.162308	0.072	0.136	1
Wapl	0.0024538	-0.125015	0.08	0.147	1
Armc1	0.00246117	-0.108398	0.065	0.126	1
Pfkfb3	0.00248628	-0.155884	0.051	0.105	1
Samt1	0.00249965	0.00222027	0.171	0.276	1
Rmi2	0.00250106	0.120922	0.071	0.136	1
Add3	0.0025088	-0.106774	0.048	0.101	1
Pef1	0.00251243	-0.00861763	0.089	0.161	1
Cct6a	0.00251854	-0.238228	0.063	0.122	1
mt-Nd5	0.00252261	-0.0647727	0.222	0.346	1
Acss1	0.00253147	0.0251368	0.228	0.357	1
P2rx7	0.00254581	-0.0260607	0.057	0.115	1
Nsl1	0.00256344	-0.114771	0.103	0.178	1
Fmnl3	0.00257064	0.17283	0.14	0.238	1
Sco2	0.00257558	-0.409277	0.049	0.101	1
Kdm7a	0.00257773	-0.128241	0.099	0.175	1
Psmb10	0.00259949	0.041305	0.089	0.161	1
Fkbp8	0.00260251	0.108281	0.074	0.14	1
Mga	0.00263201	-0.0559866	0.099	0.175	1
Cth	0.00263989	0.096727	0.164	0.269	1
Sec11c	0.00264649	-0.126115	0.056	0.112	1
Smarce1	0.00265589	-0.24767	0.042	0.091	1
Tbl1x	0.00268566	-0.138771	0.051	0.105	1
Smchd1	0.0027194	0.194049	0.074	0.14	1
Gnaq	0.00274049	-0.164128	0.058	0.115	1
Rpl17	0.00276041	-0.284317	0.393	0.49	1
Rnase10	0.00278232	0.0545846	0.086	0.157	1
Srgap2	0.00279423	-0.0515998	0.332	0.479	1
Usp48	0.00279637	-0.0288195	0.104	0.182	1
Rab2a	0.0028198	0.0118048	0.089	0.161	1
Pir	0.00282219	0.220192	0.131	0.224	1
Smarca5	0.00283991	0.021893	0.084	0.15	1
Slu7	0.00284328	-0.0401196	0.047	0.098	1
P2ry6	0.00284587	-0.0225232	0.051	0.105	1
Dnajc5	0.00286648	0.102967	0.1	0.178	1
Bsg	0.00287559	0.0166056	0.117	0.199	1
Cant1	0.00291248	0.092289	0.131	0.22	1
Rgs5	0.00291358	0.0864218	0.195	0.315	1
Fth1	0.00293291	-0.128949	0.405	0.563	1
Srprb	0.00293439	-0.134024	0.056	0.112	1
Gapdhs	0.00293898	-0.170894	0.202	0.294	1
Pign	0.00296186	-0.256706	0.079	0.143	1
Morc3	0.00296495	0.0558659	0.128	0.217	1
Chd7	0.00296816	0.0558488	0.154	0.252	1
Slc25a4	0.00297588	0.0735339	0.065	0.126	1
Ddx24	0.00298804	-0.087458	0.082	0.15	1
Mblac1	0.00300498	0.0456844	0.042	0.091	1
Itga6	0.00301963	-0.252651	0.192	0.294	1
Nol7	0.00305494	0.0119973	0.042	0.091	1
Junb	0.00306903	-0.222557	0.73	0.832	1
Samhd1	0.00308041	0.130977	0.039	0.087	1
Sft2d2	0.00308544	0.0133838	0.113	0.192	1
Sowahc	0.00308866	-0.117101	0.042	0.091	1
Tgfbr1	0.00311298	-0.0718607	0.472	0.682	1
Atmin	0.0031169	-0.2539	0.052	0.105	1
Dhx36	0.00312746	-0.234547	0.038	0.084	1
B4galnt1	0.00312875	-0.00453865	0.09	0.161	1
Ctsd	0.00312922	0.230994	0.915	0.934	1
Dnajb11	0.00312978	0.183953	0.065	0.126	1
Olr1	0.00314454	0.143843	0.039	0.087	1
Taf7	0.00314542	0.045237	0.07	0.133	1
Chd1	0.00315878	0.219139	0.1	0.178	1
Cd34	0.00316952	-0.172459	0.052	0.105	1
Zfp706	0.00319163	0.0718594	0.08	0.147	1
Mkrn1	0.00321617	-0.0478724	0.066	0.126	1
Acaa1a	0.00322147	-0.0112057	0.058	0.115	1
Slc12a9	0.00322628	-0.123523	0.061	0.119	1
Supt4a	0.00322866	0.012686	0.036	0.08	1
Zfp62	0.00324408	-0.0226672	0.063	0.122	1
2001-03-01	0.00325716	-0.0246538	0.166	0.266	1
Nav2	0.0032782	-0.179557	0.055	0.108	1
Pias1	0.00329052	-0.298387	0.041	0.087	1
Tfg	0.00330184	0.0407832	0.117	0.199	1
Osbpl9	0.00331154	-0.106052	0.036	0.08	1
Rdx	0.00331725	0.0744593	0.102	0.178	1
Metrnl	0.00332012	-0.00639233	0.058	0.115	1
Psma4	0.00335912	-0.0401697	0.069	0.129	1
Hsd17b11	0.00336734	-0.00765287	0.095	0.168	1
Slc7a8	0.00338435	-0.079184	0.049	0.101	1
Limd2	0.00339673	-0.00784933	0.108	0.185	1
Usf2	0.00340194	0.086796	0.09	0.161	1
Rap1a	0.00342002	0.0489128	0.098	0.171	1
Rpl35	0.00342666	-0.0869597	0.118	0.199	1
Prpf8	0.00343316	-0.198156	0.041	0.087	1
Sdc1	0.00343674	-0.185759	0.057	0.112	1
Tax1bp1	0.00348883	-0.00182289	0.137	0.224	1
C1qa	0.00350953	-0.149308	0.602	0.748	1
Rbx1	0.00352833	0.0332136	0.131	0.217	1
Rbm26	0.00353779	-0.0544539	0.086	0.154	1
Rep15	0.00354916	0.0762439	0.25	0.36	1
Tnks2	0.0035734	-0.112192	0.187	0.29	1
Ankle2	0.00357702	-0.194061	0.129	0.213	1
Fndc3a	0.0035875	-0.182224	0.06	0.115	1
Bod1	0.00359235	-0.130236	0.114	0.192	1
Pla2g4b	0.00360856	-0.0115721	0.052	0.105	1
Epn2	0.00360891	-0.0742796	0.055	0.108	1
Folh1	0.00363011	-0.27017	0.046	0.094	1
Ywhaq	0.00369799	-0.237196	0.058	0.112	1
Pitpna	0.00372143	-0.0957046	0.081	0.147	1
Vdac2	0.00373984	0.0621642	0.115	0.196	1
Vps35	0.00376318	-0.202092	0.07	0.129	1
Gpat4	0.00377015	-0.0690467	0.055	0.108	1
Ubc	0.00378586	-0.197232	0.75	0.895	1
Tm6sf1	0.00379394	0.111747	0.102	0.178	1
Prrc2c	0.00379889	-0.0222019	0.175	0.276	1
Rpl22	0.00382374	-0.0947431	0.043	0.091	1
Map1lc3b	0.00382493	0.049812	0.074	0.136	1
Ptprc	0.00383383	-0.0431348	0.306	0.448	1
Nosip	0.00386398	0.111668	0.208	0.329	1
Ttc14	0.00390621	-0.0922618	0.043	0.091	1
Rnase6	0.00398022	0.0357945	0.129	0.213	1
Api5	0.00400881	-0.261051	0.039	0.084	1
Odc1	0.00407577	-0.0902678	0.08	0.143	1
Dhrs3	0.00409517	0.0369214	0.084	0.15	1
Spsb3	0.00411093	0.152258	0.109	0.189	1
Ldlrad4	0.00412108	-0.117803	0.046	0.094	1
Srsf10	0.00418743	-0.15305	0.051	0.101	1
Tardbp	0.00421669	-0.0169172	0.06	0.115	1
Pom121	0.00421772	-0.282305	0.034	0.077	1
Ifrd1	0.00422916	0.0486945	0.084	0.15	1
Ppp1r12c	0.00423348	-0.118891	0.07	0.129	1
Tra2a	0.00423468	-0.102667	0.133	0.217	1
Tmbim6	0.00429139	0.090676	0.345	0.528	1
Birc6	0.00429476	-0.182735	0.1	0.171	1
Usp7	0.00430686	-0.128955	0.126	0.206	1
Golga4	0.0043094	-0.0871035	0.099	0.171	1
Fau	0.00431941	0.103673	0.303	0.451	1
Rnf130	0.00432664	0.147222	0.135	0.224	1
Csf2rb	0.00432806	0.0584233	0.043	0.091	1
Zfp120	0.00432806	0.0228181	0.043	0.091	1
Inca1	0.00435401	0.114957	0.137	0.224	1
Nfe2l2	0.00435532	-0.0402892	0.115	0.192	1
Cnmd	0.00437805	-0.085518	0.048	0.098	1
Cntf	0.00438404	0.150542	0.103	0.178	1
Leprot	0.0044085	0.0475486	0.104	0.178	1
Cpsf3	0.00445968	0.0605117	0.048	0.098	1
Nap1l1	0.00447002	-0.169373	0.034	0.077	1
Trip11	0.00449546	-0.129572	0.082	0.147	1
Nup153	0.00450885	-0.249898	0.039	0.084	1
Atraid	0.00454268	-0.0427404	0.048	0.098	1
Nras	0.00454614	0.0382413	0.043	0.091	1
Ehd4	0.00457172	0.0434329	0.135	0.22	1
Eef1d	0.00458331	-0.281655	0.044	0.091	1
Pcmt1	0.00459785	-0.152371	0.037	0.08	1
Ctbp2	0.00469146	-0.0448172	0.09	0.157	1
Wipf1	0.00469312	-0.206691	0.061	0.115	1
Eif4e3	0.00469492	0.0383714	0.142	0.231	1
Actr2	0.00469744	0.277409	0.141	0.234	1
Hpgds	0.00473753	-0.0124402	0.369	0.538	1
Eif4a1	0.00473762	0.0409971	0.152	0.241	1
Usf1	0.0047465	0.00954516	0.129	0.213	1
Zfr	0.00474733	0.116122	0.057	0.112	1
Hyou1	0.00480662	-0.195438	0.053	0.105	1
Zyg11b	0.00485095	-0.0748974	0.058	0.112	1
Ptk2	0.00485961	-0.142782	0.061	0.115	1
P2ry13	0.00490709	-0.0179051	0.299	0.444	1
Cnbd2	0.00493663	0.233546	0.076	0.14	1
Stt3a	0.00496419	-0.112419	0.058	0.112	1
Khk	0.00497156	-0.260159	0.044	0.091	1
Jade2	0.00500453	-0.018852	0.08	0.143	1
Yme1l1	0.0050087	-0.130134	0.061	0.115	1
Tcirg1	0.00501749	0.0598758	0.135	0.22	1
C3ar1	0.00503219	0.130664	0.127	0.21	1
Lrp1b	0.00504622	0.0671943	0.214	0.329	1
Vapb	0.0050482	0.0682184	0.102	0.175	1
Nr2c2	0.00509886	-0.0124733	0.053	0.105	1
Nrd1	0.00516069	0.0672434	0.072	0.133	1
Fam13b	0.00516319	-0.100779	0.042	0.087	1
Srrm1	0.00517115	0.0538816	0.128	0.21	1
1700017B05Rik	0.00521158	-0.0370287	0.109	0.182	1
Ankrd12	0.00525266	-0.113999	0.044	0.091	1
Secisbp2l	0.00528179	0.0459592	0.121	0.199	1
Bank1	0.00530588	-0.0972077	0.056	0.108	1
Il10ra	0.00532688	0.0582404	0.278	0.416	1
Ppp2r5c	0.00534691	0.0981331	0.09	0.157	1
Ccdc50	0.00537182	-0.149339	0.113	0.189	1
Oaz1	0.00544251	0.135083	0.283	0.42	1
Samd1	0.00545166	0.202028	0.086	0.154	1
Lat2	0.00547573	0.0208078	0.081	0.143	1
Atp6v1b1	0.00559095	0.0273869	0.119	0.199	1
Dock8	0.00565739	0.08063	0.11	0.185	1
Bmp2k	0.00570995	0.0318678	0.245	0.364	1
Washc2	0.00574999	-0.195614	0.1	0.168	1
Tent4b	0.00575974	-0.0853295	0.044	0.091	1
Trip12	0.00577385	-0.117279	0.109	0.182	1
Cap2	0.00578532	-0.17405	0.077	0.136	1
Nptn	0.00580296	0.0779094	0.165	0.262	1
Trafd1	0.00581667	0.0164005	0.063	0.119	1
Usp9x	0.00586078	-0.180997	0.06	0.112	1
Arhgef40	0.00588984	-0.185068	0.08	0.14	1
Cr2	0.00592575	0.0617631	0.033	0.073	1
Unc93b1	0.00593654	-0.0285476	0.288	0.427	1
Capzb	0.00594058	0.329088	0.166	0.269	1
Ifi27	0.00594939	-0.195057	0.082	0.143	1
Map3k3	0.00601047	0.242736	0.067	0.126	1
Rer1	0.00603464	-0.176494	0.112	0.182	1
Rinl	0.00603819	0.120054	0.09	0.157	1
Txnl1	0.00612637	0.0434265	0.114	0.189	1
Atp5f1	0.00618991	0.0704571	0.086	0.15	1
Col27a1	0.00619239	0.0983601	0.118	0.196	1
Myl9	0.00620698	-0.0285041	0.049	0.098	1
Fam193b	0.0062197	0.157874	0.056	0.108	1
Myl12b	0.00622493	-0.331036	0.046	0.091	1
Adipor1	0.00627149	0.135518	0.071	0.129	1
Spint1	0.00629772	-0.0118428	0.049	0.098	1
Cetn4	0.00630788	0.0551199	0.049	0.098	1
Rpl17-ps10	0.00631584	0.491371	0.096	0.045	1
Coasy	0.00631909	0.0296299	0.23	0.346	1
Filip1l	0.00633119	0.110705	0.091	0.157	1
Mon1a	0.00633677	0.0979439	0.146	0.234	1
Hoxb2	0.00634481	-0.0586256	0.06	0.112	1
Palb2	0.00649573	0.278612	0.082	0.147	1
Arid1a	0.00652472	0.0905031	0.123	0.203	1
Rps4x	0.00655046	0.180693	0.279	0.413	1
Zfp608	0.00655543	-0.259806	0.046	0.091	1
Ets2	0.00661442	0.164136	0.044	0.091	1
Sec63	0.00663871	-0.0379891	0.055	0.105	1
Prn	0.00663871	-0.02359	0.055	0.105	1
Klhl24	0.0066461	0.0644639	0.071	0.129	1
Thrap3	0.00665381	-0.0025763	0.115	0.189	1
Phf23	0.00669576	0.0496904	0.052	0.101	1
Pdia3	0.00673472	0.147284	0.299	0.455	1
Rtf1	0.00677282	0.0090236	0.055	0.105	1
Marcksl1	0.0067986	0.0110988	0.07	0.126	1
Snw1	0.00682179	-0.100484	0.065	0.119	1
Smurf2	0.00687409	-0.00103355	0.08	0.14	1
Plekhb1	0.00707979	-0.0823544	0.214	0.322	1
Gpr34	0.00719406	-0.0198118	0.256	0.378	1
Ubtf	0.00723466	0.163658	0.113	0.189	1
Ppp2r2a	0.0072658	0.0545515	0.057	0.108	1
Fubp1	0.00727445	0.0332679	0.067	0.122	1
Numa1	0.00727996	-0.0451156	0.124	0.199	1
Sf3b1	0.0072903	0.027588	0.327	0.493	1
Slc8a1	0.00730499	0.0203294	0.062	0.115	1
Rnf20	0.00737877	0.0862878	0.055	0.105	1
Gal3st4	0.0074079	-0.129373	0.113	0.182	1
Saraf	0.00750201	0.131795	0.127	0.206	1
BC035044	0.00750714	-0.141414	0.048	0.094	1
Stmnd1	0.00751774	-0.188408	0.056	0.105	1
Zranb1	0.00754263	-0.0585667	0.043	0.087	1
Cecr2	0.00756182	0.152941	0.041	0.084	1
Ptges	0.00758358	0.0806364	0.155	0.245	1
Il17ra	0.00759492	-0.0826437	0.102	0.168	1
Man1a2	0.00761154	0.165236	0.142	0.227	1
Ube2k	0.00763236	0.221067	0.052	0.101	1
Tg	0.00768903	0.134391	0.109	0.182	1
Sec14l1	0.00777425	-0.107927	0.074	0.129	1
Golga2	0.00785648	0.0287023	0.095	0.161	1
Cask	0.00787213	-0.0496496	0.046	0.091	1
Zfp710	0.00787992	-0.0760094	0.088	0.15	1
Slc37a2	0.00788666	-0.368376	0.057	0.105	1
Rpsa	0.00791676	-0.0305219	0.296	0.399	1
Notch1	0.00791993	-0.192628	0.039	0.08	1
Atp6ap1	0.00796683	-0.19096	0.086	0.147	1
Nln	0.00810806	0.0461045	0.099	0.164	1
Aup1	0.0081536	0.0817891	0.067	0.122	1
Ash1l	0.00820503	0.109383	0.162	0.252	1
Hhex	0.00823665	-0.11387	0.061	0.112	1
Myo6	0.00827482	0.0743637	0.19	0.283	1
Atp6v1d	0.00830875	0.266247	0.041	0.084	1
Cabin1	0.00832824	0.0432818	0.048	0.094	1
Rpl26	0.00836152	0.12507	0.198	0.294	1
Havcr2	0.00837419	0.234949	0.164	0.259	1
Ppib	0.00840985	-0.07406	0.164	0.248	1
Rpl22l1	0.00841478	0.0771843	0.051	0.098	1
Rb1cc1	0.00845201	-0.0394385	0.056	0.105	1
Gnas	0.00846117	0.0609929	0.288	0.42	1
Hmgn2	0.00848694	0.102511	0.174	0.262	1
Wasf2	0.00854652	0.115874	0.239	0.364	1
Glrx3	0.00856325	-0.154249	0.039	0.08	1
Ppp1r11	0.00862263	-0.154552	0.039	0.08	1
Zc3h13	0.0086416	-0.258227	0.055	0.101	1
Atp6v0a2	0.00865399	-0.110946	0.11	0.178	1
Ddx17	0.00865805	0.0210344	0.137	0.217	1
Rpl37	0.00868183	0.132526	0.056	0.105	1
Kmt2b	0.00870992	0.161405	0.249	0.378	1
Jmjd1c	0.00872066	0.0557887	0.25	0.374	1
Psmb4	0.00875056	0.0711682	0.129	0.206	1
Ccz1	0.00876126	0.226838	0.048	0.094	1
Eif3j1	0.00882952	-0.240784	0.07	0.122	1
Zfp36l1	0.00884022	0.0517788	0.113	0.185	1
Cd86	0.0088567	0.156013	0.103	0.171	1
Smarca2	0.00885709	-0.0916257	0.103	0.168	1
Atp2c1	0.00888035	-0.111722	0.096	0.161	1
Kdm5b	0.00896621	0.0767923	0.051	0.098	1
Irf8	0.00901454	0.074967	0.274	0.406	1
Rpl35a-ps2	0.00901855	-0.0466515	0.047	0.091	1
Pfdn5	0.00914424	-0.13644	0.067	0.119	1
Peak1	0.00927555	0.23538	0.091	0.157	1
Sptan1	0.00933637	-0.0932844	0.042	0.084	1
Laptm4a	0.00936967	0.171128	0.161	0.252	1
Macf1	0.00940789	-0.128492	0.529	0.71	1
Atp6v1c1	0.00945144	-0.0121288	0.061	0.112	1
Ern1	0.00950094	-0.19085	0.57	0.682	1
Serinc1	0.00952672	0.0914079	0.166	0.259	1
Cct7	0.00956734	0.0124119	0.079	0.136	1
Zfp622	0.00958264	0.233012	0.048	0.094	1
Lman2	0.0096178	0.00257462	0.102	0.168	1
Plcg2	0.0096382	-0.0825283	0.291	0.423	1
Cd68	0.00965129	0.0363301	0.142	0.224	1
Ndufb3	0.00967324	-0.136289	0.049	0.094	1
Uba1	0.00973757	0.0331333	0.061	0.112	1
Rpl23a	0.00981394	0.104295	0.102	0.164	1
Psma7	0.00984613	0.0444661	0.084	0.143	1
Dtx4	0.00986464	0.043956	0.079	0.136	1
Arfgef1	0.00988384	0.222586	0.058	0.108	1
Specc1	0.00994434	0.162046	0.123	0.199	1
Lrrfip1	0.00996849	-0.0674267	0.077	0.133	1
Gp2	0.0100785	-0.072522	0.132	0.206	1
Cul3	0.0101087	0.210368	0.082	0.143	1
Bcor	0.0101259	-0.126877	0.055	0.101	1
Ppp6r1	0.0101328	-0.158598	0.072	0.126	1
Papola	0.0101706	0.00577374	0.089	0.15	1
Ccs	0.0102011	-0.0154745	0.077	0.133	1
Ntpcr	0.0102011	-0.108933	0.077	0.133	1
Rp9	0.0102078	-0.043447	0.439	0.587	1
Arpc5l	0.0102106	-0.0889769	0.123	0.196	1
Gm2a	0.0102116	0.209493	0.056	0.105	1
Slc43a2	0.0102366	-0.0234975	0.074	0.129	1
Pold2	0.0103352	0.208789	0.128	0.206	1
Ubr3	0.0103357	0.0121564	0.044	0.087	1
Alyref2	0.0103742	-0.0409827	0.052	0.098	1
Gtpbp4	0.0104185	-0.00466796	0.047	0.091	1
Ube3a	0.0104482	-0.367553	0.088	0.143	1
Smox	0.0105476	0.138196	0.074	0.129	1
Ptbp3	0.0105745	0.143476	0.112	0.182	1
Rfc1	0.0106335	0.0445037	0.047	0.091	1
Ptpra	0.0106812	0.00693063	0.179	0.269	1
Il21r	0.0107578	-0.0190402	0.1	0.164	1
Plekha2	0.0107763	0.0899861	0.049	0.094	1
Atf4	0.0108487	-0.0176892	0.197	0.297	1
Ppp1ca	0.0109088	0.231209	0.098	0.164	1
Pja2	0.0109873	-0.300384	0.046	0.087	1
Kctd12b	0.0110151	0.0335622	0.348	0.5	1
Ube2d2a	0.0110273	-0.0788043	0.075	0.129	1
Slc38a6	0.0110337	0.0699803	0.052	0.098	1
U2af2	0.0111452	0.205062	0.071	0.126	1
Stard3	0.0111801	0.297079	0.121	0.196	1
Akna	0.0111891	0.26467	0.071	0.126	1
Hsp90b1	0.0112567	-0.159604	0.539	0.717	1
Pik3r5	0.0113174	-0.227284	0.043	0.084	1
Rhobtb1	0.011373	0.0878755	0.082	0.14	1
Scoc	0.0114803	0.0640313	0.218	0.322	1
Sp110	0.0114814	-0.391173	0.063	0.112	1
Hjurp	0.0115258	-0.0123098	0.065	0.115	1
Mfap1a	0.0115415	-0.156416	0.084	0.14	1
Rflnb	0.011552	-0.27526	0.041	0.08	1
Sel1l	0.0115765	0.116659	0.344	0.507	1
Cep68	0.0115999	0.308691	0.091	0.154	1
Tmed9	0.0116335	0.221024	0.108	0.178	1
Trim28	0.0116432	-0.0301512	0.052	0.098	1
Pura	0.0117858	-0.00431814	0.088	0.147	1
Cotl1	0.011819	0.0654446	0.289	0.423	1
Khdrbs1	0.0118308	-0.133054	0.076	0.129	1
Itgam	0.0118964	0.0104395	0.516	0.703	1
Psmd11	0.0119015	-0.162127	0.041	0.08	1
Rnf216	0.0119077	0.0811572	0.065	0.115	1
Cbx5	0.0119661	-0.252755	0.046	0.087	1
Slc7a7	0.0121939	-0.155257	0.046	0.087	1
Srek1	0.0122732	0.0744793	0.07	0.122	1
Ss18	0.0124254	-0.0497776	0.046	0.087	1
Ppp2ca	0.0126929	-0.0752319	0.112	0.178	1
Rap1gds1	0.0127232	0.0496286	0.08	0.136	1
Ahsa1	0.0127632	0.208329	0.052	0.098	1
Ppfia1	0.0128201	-0.124819	0.046	0.087	1
Grasp	0.0128833	-0.103797	0.061	0.108	1
Mtbp	0.0129642	0.163516	0.065	0.115	1
Rnd1	0.012981	-0.0616701	0.046	0.087	1
Eif6	0.0129861	-0.0360866	0.048	0.091	1
Renbp	0.0130133	0.199602	0.095	0.157	1
Trappc10	0.0130286	0.163351	0.038	0.077	1
Rpl10-ps3	0.0130392	-0.0119406	0.207	0.294	1
Eef2k	0.0131281	-0.339107	0.081	0.136	1
Srms	0.0131533	-0.101847	0.114	0.178	1
Itpripl2	0.0131993	-0.00148092	0.041	0.08	1
Entpd1	0.0132503	0.0985493	0.31	0.451	1
Cldn3	0.0133508	0.289125	0.089	0.15	1
Anapc5	0.0134868	0.0142923	0.051	0.094	1
Zfp106	0.0135662	-0.0916268	0.079	0.133	1
Wdr1	0.013567	0.172234	0.07	0.122	1
Bcl2	0.0136006	-0.135663	0.105	0.168	1
Syt2	0.0137103	-0.337646	0.039	0.077	1
Trpc4ap	0.0137252	0.0293677	0.063	0.112	1
Ppp1r9b	0.0137379	0.265804	0.072	0.126	1
Ppp1cb	0.0137914	0.0108756	0.046	0.087	1
Hspa9	0.0138135	-0.0302272	0.091	0.15	1
Atxn10	0.0139075	0.0591842	0.069	0.119	1
Sirpa	0.0139344	-0.0795339	0.414	0.58	1
Syce1l	0.0140107	0.163319	0.088	0.147	1
Tspan3	0.0140685	-0.169789	0.061	0.108	1
Dynll1	0.0141127	0.218241	0.197	0.301	1
Rnase11	0.014116	0.0527158	0.056	0.101	1
Dyrk2	0.0141202	-0.0119379	0.051	0.094	1
Map7d1	0.0141499	0.0532428	0.096	0.157	1
Vav2	0.0142021	0.0767862	0.046	0.087	1
Ugt1a7c	0.0142645	-0.030197	0.039	0.077	1
Ap3m1	0.0143813	0.124766	0.095	0.157	1
Spns1	0.0143908	0.072894	0.272	0.395	1
Fkbp4	0.0144148	-0.018812	0.051	0.094	1
Gnai2	0.0144671	0.110614	0.381	0.566	1
Jpt1	0.0144671	0.194275	0.046	0.087	1
Wsb1	0.0144808	0.116972	0.141	0.22	1
Gas6	0.0144898	0.0815118	0.066	0.115	1
Huwe1	0.0145802	0.0598825	0.086	0.143	1
Kmt5b	0.0146591	-0.0591955	0.063	0.112	1
Urb2	0.0146662	0.0307648	0.086	0.143	1
Fam111a	0.0146947	0.0495341	0.074	0.126	1
Snx17	0.0147502	0.218507	0.088	0.147	1
Smap2	0.0147829	0.0820046	0.307	0.444	1
Slc35b1	0.0148627	-0.214663	0.039	0.077	1
Rabac1	0.0149269	0.13657	0.127	0.199	1
Pea15a	0.0149508	-0.223775	0.06	0.105	1
Phb2	0.0150094	0.114778	0.032	0.066	1
Eme1	0.0150213	0.0917876	0.279	0.413	1
Csad	0.0151055	-0.187966	0.042	0.08	1
Ncf1	0.0151256	0.21922	0.239	0.357	1
2007-09-01	0.0151336	0.0267792	0.104	0.168	1
Tnfaip8	0.0151461	-0.0556895	0.037	0.073	1
Ascl2	0.0151561	0.0398337	0.086	0.143	1
Sec24b	0.0151707	0.223686	0.048	0.091	1
H2-DMb1	0.0152263	-0.115795	0.042	0.08	1
Cnga2	0.0152808	0.249881	0.239	0.357	1
Romo1	0.0152925	0.0907921	0.286	0.416	1
Gtf2i	0.015298	0.327012	0.077	0.133	1
Camk2d	0.0153601	0.0302035	0.063	0.112	1
Ldha	0.0154001	-0.190671	0.077	0.129	1
Bri3	0.0154072	-0.057431	0.039	0.077	1
Adipor2	0.0156903	0.103102	0.056	0.101	1
2002-03-01	0.0159239	0.218979	0.051	0.094	1
Zfp992	0.0160073	-0.0839909	0.055	0.098	1
Zfp207	0.0160679	0.14305	0.056	0.101	1
Chordc1	0.0160755	-0.248142	0.055	0.098	1
Eif4b	0.0161108	-0.0340003	0.107	0.168	1
Irf2bp2	0.0161128	0.110411	0.056	0.101	1
Wls	0.0161483	-0.169411	0.067	0.115	1
Cldn1	0.0161662	0.178405	0.18	0.273	1
Kdm5a	0.0161922	-0.0206889	0.086	0.14	1
Gcc2	0.0163355	0.156286	0.053	0.098	1
Hnrnpa3	0.0164511	-0.040785	0.212	0.294	1
Tut7	0.0164906	0.267052	0.175	0.266	1
Rps25	0.0165024	-0.0617654	0.07	0.119	1
Sec61a1	0.0165332	-0.100232	0.075	0.126	1
Slc12a6	0.0165883	-0.0875769	0.044	0.084	1
Dennd1c	0.0166765	-0.168323	0.055	0.098	1
Gng5	0.0167437	0.0901314	0.042	0.08	1
Csf3r	0.0167515	-0.202872	0.089	0.143	1
Pdcd6ip	0.0167538	0.251388	0.056	0.101	1
Cdk13	0.0167572	-0.0541605	0.08	0.133	1
Mef2a	0.0168462	-0.0258422	0.338	0.476	1
Tango2	0.0168647	-0.0318289	0.143	0.217	1
Srp14	0.0168651	-0.0562638	0.047	0.087	1
Atf7ip	0.0169342	0.10322	0.071	0.122	1
Syngr1	0.0169678	-0.0359879	0.203	0.294	1
Rps23-ps2	0.0170623	-0.0467616	0.049	0.091	1
Kxd1	0.0170948	0.0120151	0.198	0.287	1
Eif3h	0.0171334	0.0324759	0.062	0.108	1
Lrpprc	0.017194	0.148947	0.037	0.073	1
Mlana	0.0172361	0.06747	0.091	0.15	1
Tars	0.0174014	-0.129076	0.086	0.14	1
Ooep	0.017517	-0.0947433	0.065	0.112	1
Akap13	0.0175362	0.0335311	0.234	0.339	1
Wdr43	0.017551	-0.00579023	0.042	0.08	1
Skil	0.0175771	0.0951583	0.272	0.395	1
Smarca4	0.0176029	-0.0210087	0.082	0.136	1
6820431F20Rik	0.0176283	-0.0596674	0.096	0.154	1
Adh5	0.0176634	0.102405	0.044	0.084	1
Wdr81	0.0179632	0.0234782	0.055	0.098	1
Extl3	0.0182642	0.0996953	0.085	0.14	1
Wbp11	0.0184857	0.0461649	0.049	0.091	1
Slc38a10	0.0185192	0.156163	0.088	0.143	1
Herc2	0.0185453	0.275343	0.208	0.311	1
Arf4	0.0187738	0.0819193	0.047	0.087	1
Lrrc58	0.0188012	0.180507	0.052	0.094	1
Amfr	0.018821	-0.221567	0.063	0.108	1
Gdi2	0.0189216	0.223743	0.241	0.357	1
Lamtor1	0.0189385	0.070384	0.055	0.098	1
Tanc2	0.0189958	0.139312	0.227	0.336	1
Rnaset2a	0.0190768	-0.155789	0.325	0.427	1
Tubb5	0.0190897	0.0933376	0.124	0.192	1
Mrm1	0.0190986	0.053967	0.067	0.115	1
Pbxip1	0.0191023	0.0726441	0.146	0.22	1
Ccdc47	0.0191257	0.320956	0.082	0.136	1
Psmc5	0.0192456	0.189856	0.057	0.101	1
Tmx3	0.0193281	0.117056	0.065	0.112	1
Tmem176b	0.0193785	0.0527233	0.185	0.273	1
Relt	0.0198002	0.109602	0.07	0.119	1
Nfkbib	0.0198396	-0.17396	0.048	0.087	1
Stk4	0.0198809	0.0707552	0.062	0.108	1
Safb	0.0199284	0.141063	0.143	0.217	1
Flrt3	0.0200466	-0.0851087	0.218	0.308	1
Ivns1abp	0.0200908	-0.0575704	0.385	0.521	1
Kpna3	0.0201135	-0.159017	0.046	0.084	1
Tlx2	0.0201849	0.150391	0.049	0.091	1
Ndufs8	0.0202666	0.0775472	0.067	0.115	1
Sh3kbp1	0.0202666	0.162267	0.067	0.115	1
Bfar	0.0203645	-0.166671	0.041	0.077	1
Cdk19	0.020415	-0.166558	0.046	0.084	1
Pcbp2	0.0205647	0.167438	0.09	0.147	1
Hsd17b12	0.0205727	0.113224	0.055	0.098	1
Cct3	0.020607	0.204639	0.065	0.112	1
Runx1	0.0206655	-0.146659	0.056	0.098	1
Gna12	0.0207139	-0.0953775	0.098	0.154	1
Atp2a2	0.0207288	0.166723	0.07	0.119	1
Mapk14	0.0208516	0.134647	0.095	0.154	1
Spast	0.0208853	0.23609	0.055	0.098	1
Nek7	0.0208874	0.280477	0.119	0.189	1
Zmym5	0.0209127	-0.0184153	0.066	0.112	1
Tyrobp	0.0209244	0.0743557	0.259	0.374	1
Rps16	0.0210802	0.0255551	0.168	0.245	1
Ecscr	0.0211446	0.140886	0.123	0.189	1
H3f3b	0.0212581	-0.111696	0.459	0.601	1
Ninl	0.0213627	0.0136676	0.051	0.091	1
Lars2	0.0213659	-0.0339832	0.506	0.671	1
Ptges3l	0.0215054	0.0123222	0.041	0.077	1
Rapgefl1	0.0216634	-0.0895898	0.058	0.101	1
Clec3b	0.0217101	0.0848163	0.065	0.112	1
Nfatc1	0.0217599	-0.0942681	0.056	0.098	1
Matn3	0.0218622	-0.0927826	0.048	0.087	1
Rpl36a	0.0218796	0.258368	0.098	0.157	1
Glud1	0.0219097	-0.0585097	0.069	0.115	1
Arhgap30	0.0219786	0.162423	0.075	0.126	1
Slf2	0.0219798	0.0408763	0.195	0.283	1
Rpl19	0.0221563	0.14894	0.326	0.441	1
Gcnt1	0.0221641	0.0418965	0.121	0.185	1
Snf8	0.0223233	0.154893	0.099	0.157	1
Inpp5d	0.02235	-0.030698	0.189	0.276	1
Zfp326	0.0224066	0.0552156	0.046	0.084	1
Cd84	0.0224283	0.26556	0.102	0.161	1
Stau1	0.0225375	0.0322187	0.056	0.098	1
Arpc2	0.0225387	0.0814096	0.263	0.374	1
Uvrag	0.0226003	0.0284829	0.051	0.091	1
Dmtf1	0.0226361	0.165404	0.094	0.15	1
Epb41l2	0.0226363	0.0906172	0.371	0.524	1
Prpf40a	0.0226376	0.17245	0.103	0.161	1
Nlgn2	0.0228525	-0.211408	0.06	0.101	1
Eif3b	0.0230308	0.166237	0.231	0.332	1
Pald1	0.0230769	0.178976	0.154	0.231	1
Rbm8a	0.0232031	0.160743	0.043	0.08	1
Chka	0.0232148	-0.0272543	0.066	0.112	1
Gbgt1	0.0234124	0.0857215	0.043	0.08	1
Mllt10	0.0235157	0.128413	0.046	0.084	1
Rpl13	0.0235447	-0.0496432	0.33	0.42	1
Camk1d	0.0235591	-0.0542494	0.056	0.098	1
Lysmd2	0.0236347	0.0337724	0.051	0.091	1
Mill2	0.023698	0.331235	0.077	0.129	1
Snx29	0.0237295	0.17072	0.043	0.08	1
Ep400	0.0238235	0.106265	0.048	0.087	1
Chd8	0.0238252	0.230926	0.102	0.161	1
Bst2	0.0238573	-0.0578474	0.312	0.434	1
Ap3d1	0.0238753	0.190521	0.122	0.189	1
Wdfy3	0.0239811	0.0200576	0.058	0.101	1
Myo1f	0.0240771	0.443203	0.072	0.122	1
Cox6a1	0.024102	0.21214	0.041	0.077	1
Irgm2	0.0241704	0.171852	0.202	0.297	1
Stat3	0.0242195	0.0858122	0.066	0.112	1
Hdac5	0.0243405	-0.203637	0.049	0.087	1
Ddost	0.0243745	0.145052	0.102	0.161	1
Tpbgl	0.0244694	0.163692	0.081	0.133	1
Ophn1	0.0244967	0.0714185	0.137	0.206	1
Sgtb	0.0246038	0.249671	0.269	0.388	1
Pdzd8	0.0247023	-0.146783	0.062	0.105	1
Parp1	0.0248432	0.108118	0.058	0.101	1
Mepce	0.0248504	0.13037	0.043	0.08	1
Rpl39l	0.0249237	0.210503	0.046	0.084	1
Emc7	0.0250169	0.219196	0.056	0.098	1
Map3k2	0.0252841	0.171385	0.056	0.098	1
Csnk1d	0.025293	0.173372	0.066	0.112	1
Ramp1	0.025315	-0.0329393	0.353	0.479	1
Ptprs	0.025316	0.208449	0.214	0.315	1
Rerg	0.025381	-0.33914	0.039	0.073	1
Ddx3y	0.0256777	0.238914	0.091	0.147	1
Gtf2a1l	0.0257774	-0.251425	0.042	0.077	1
Zscan26	0.0259576	-0.365165	0.047	0.084	1
Prc1	0.0260136	0.318007	0.151	0.231	1
Zfp445	0.026099	-0.0863991	0.055	0.094	1
Eif4e2	0.0262017	0.111348	0.258	0.367	1
Mapk1ip1	0.0262527	0.281239	0.046	0.084	1
Virma	0.0262569	-0.172469	0.039	0.073	1
Tnfaip8l2	0.0263545	-0.0446035	0.062	0.105	1
Pycard	0.0266542	0.000813808	0.108	0.164	1
Eno4	0.0267973	-0.239971	0.085	0.133	1
Cerk	0.026966	0.13577	0.247	0.357	1
App	0.0269918	0.150554	0.135	0.203	1
Pla2g15	0.0270578	0.12837	0.23	0.329	1
Mgat4a	0.0271617	0.0383716	0.15	0.22	1
Lpcat2	0.0271969	0.00142419	0.353	0.486	1
Ppfia4	0.0272843	0.133846	0.159	0.234	1
Hspb3	0.0272851	-0.0575041	0.057	0.098	1
Lap3	0.0273292	0.20578	0.066	0.112	1
Mdh1b	0.0273564	-0.0738359	0.057	0.098	1
Sdha	0.0274018	0.0192599	0.067	0.112	1
Rasa4	0.0274658	0.0621255	0.085	0.136	1
Pkn3	0.0274895	-0.0938689	0.042	0.077	1
Slc1a3	0.0275052	-6.55156e-05	0.072	0.119	1
Psmb8	0.027686	0.211354	0.103	0.161	1
Tlr7	0.0277304	0.332	0.091	0.147	1
Chchd2	0.0278722	0.0944648	0.129	0.192	1
Otulinl	0.0278744	0.106876	0.287	0.402	1
Siglech	0.0278994	-0.121564	0.544	0.682	1
Brd8	0.0279392	0.0150254	0.067	0.112	1
Stx5a	0.0279485	0.0228736	0.049	0.087	1
Arih1	0.0281479	-0.0616708	0.047	0.084	1
Cd300c2	0.0282221	0.237253	0.079	0.129	1
Rims3	0.0282593	-0.0153616	0.039	0.073	1
Adnp	0.0282919	-0.0133617	0.084	0.133	1
Impdh2	0.0283306	-0.12044	0.044	0.08	1
Cnot8	0.0283487	-0.0540613	0.062	0.105	1
Bnip2	0.0284168	0.0359726	0.067	0.112	1
Slc38a2	0.02849	0.113635	0.093	0.147	1
Slc25a5	0.0285533	0.254214	0.143	0.217	1
Usp15	0.028646	-0.0277947	0.055	0.094	1
Ghitm	0.0287889	0.147835	0.077	0.126	1
Sash3	0.0288266	0.0481275	0.042	0.077	1
Csnk2a1	0.0289364	0.20746	0.067	0.112	1
Edn1	0.0290369	-0.0394748	0.108	0.164	1
Cct5	0.0292188	0.010679	0.055	0.094	1
Adam15	0.029299	0.105181	0.065	0.108	1
Cmip	0.029305	0.111285	0.057	0.098	1
Snrnp200	0.0296467	0.0561276	0.042	0.077	1
Itm2c	0.0296852	0.0786422	0.345	0.479	1
Clk4	0.0297246	0.0980678	0.062	0.105	1
Ptprj	0.0297791	0.121115	0.114	0.175	1
Adss	0.0298753	0.0983147	0.052	0.091	1
Mau2	0.0300219	0.102246	0.049	0.087	1
Asap1	0.0300334	-0.0248323	0.093	0.143	1
Hvcn1	0.0304023	0.0262126	0.141	0.206	1
Rtcb	0.0304172	-0.0531094	0.069	0.112	1
Tnp2	0.0305753	0.261203	0.126	0.192	1
P2ry12	0.0308206	-0.105214	0.662	0.797	1
St3gal5	0.0308712	0.0509175	0.151	0.22	1
Fcgr3	0.0309021	0.0531085	0.359	0.503	1
Cd83	0.0310423	0.170843	0.062	0.105	1
Tspan7	0.0310569	0.112169	0.052	0.091	1
Tor1aip2	0.0314894	0.182342	0.047	0.084	1
Sars	0.0315574	0.195922	0.052	0.091	1
Tmem59	0.0315898	0.110724	0.102	0.157	1
Dnajb9	0.032001	0.182578	0.052	0.091	1
Zfp217	0.0322329	-0.242778	0.046	0.08	1
Ostf1	0.0324935	0.0586225	0.074	0.119	1
Nus1	0.0326499	0.259621	0.109	0.168	1
Atp5md	0.0327208	0.273732	0.057	0.098	1
Gpsm3	0.0327686	0.279676	0.067	0.112	1
Olfm3	0.0328709	0.0942928	0.36	0.5	1
Trpm7	0.0330989	-0.0386786	0.082	0.129	1
Kidins220	0.0332024	-0.0311458	0.058	0.098	1
Prkag1	0.0332387	0.148099	0.094	0.147	1
Bicdl2	0.0332855	0.269958	0.077	0.126	1
Nfxl1	0.0333861	-0.0170487	0.063	0.105	1
Cox7a2l	0.0337408	0.236531	0.074	0.119	1
Ttc28	0.0337903	-0.317665	0.051	0.087	1
Csf1r	0.0339023	0.106088	0.893	0.934	1
Asb6	0.0342946	-0.0492927	0.061	0.101	1
Fcgr2b	0.0345159	0.250417	0.102	0.157	1
Atad2b	0.0345856	-0.0373461	0.056	0.094	1
Cx3cr1	0.0346887	-0.0901677	0.89	0.962	1
Blk	0.034985	0.12741	0.129	0.192	1
Taok1	0.0350143	0.411808	0.118	0.182	1
Ms4a6b	0.0351187	-0.12822	0.036	0.066	1
Fibin	0.0352675	0.0770299	0.074	0.119	1
Tcam1	0.0353634	0.35661	0.06	0.101	1
Sdcbp	0.0353646	0.150402	0.098	0.15	1
Pllp	0.0356217	0.184875	0.242	0.346	1
N4bp2l2	0.0357087	0.068455	0.058	0.098	1
Ikbke	0.0358553	0.0455362	0.063	0.105	1
Rpl14	0.0361434	0.0481011	0.42	0.552	1
Mrfap1	0.0363503	0.134938	0.155	0.227	1
Casp1	0.0363607	0.122458	0.217	0.304	1
Ddx21	0.036468	0.165971	0.103	0.157	1
Pomt1	0.0364926	0.00760143	0.42	0.584	1
Lrrk1	0.0365404	-0.185052	0.067	0.108	1
Dync1h1	0.0365552	0.260501	0.113	0.171	1
Aldoa	0.03657	0.0922244	0.107	0.161	1
Rpl10a	0.036572	0.260202	0.157	0.231	1
Ndufs2	0.0366035	0.0720983	0.066	0.108	1
Atp8a1	0.0366158	0.321827	0.135	0.203	1
Arhgap39	0.0367641	0.0256484	0.056	0.094	1
Sbf1	0.0368445	0.338639	0.095	0.15	1
Atp5a1	0.0369239	0.0106899	0.107	0.161	1
Paxbp1	0.0370445	0.15061	0.056	0.094	1
Paip1	0.0370559	0.0622948	0.046	0.08	1
Pcnt	0.0371071	0.0583394	0.046	0.08	1
Myl12a	0.0372979	0.178077	0.058	0.098	1
Rps5	0.0374427	0.116908	0.485	0.619	1
Kdm3b	0.0377057	0.0893472	0.056	0.094	1
Ssr3	0.0378063	0.05115	0.041	0.073	1
H13	0.0378097	0.197614	0.058	0.098	1
Il10rb	0.0378176	0.118895	0.088	0.136	1
Dgkd	0.0379011	0.167873	0.132	0.196	1
Ppp1cc	0.0381396	0.198126	0.103	0.157	1
Irf9	0.0382163	0.0752065	0.043	0.077	1
Vps18	0.0382706	0.155035	0.051	0.087	1
Nenf	0.0383262	0.180084	0.173	0.252	1
Clmp	0.0386539	0.0673993	0.296	0.413	1
Slc44a2	0.0389793	0.0565413	0.051	0.087	1
Caprin1	0.0389838	0.0678642	0.075	0.119	1
Grap2	0.0390767	0.198449	0.038	0.07	1
Csnk1g2	0.0393656	0.144895	0.041	0.073	1
Trio	0.0395019	0.0470808	0.08	0.126	1
Rspo1	0.0396488	0.297935	0.145	0.213	1
Ube2h	0.0399288	0.0993804	0.08	0.126	1
Sox30	0.0399657	0.183627	0.058	0.098	1
Fbxo33	0.0400785	0.175093	0.048	0.084	1
Mtss1l	0.040344	0.065143	0.138	0.203	1
2007-03-01	0.0403766	0.195326	0.071	0.115	1
Galnt1	0.0404003	0.182797	0.09	0.14	1
Lasp1	0.0407866	0.0292858	0.372	0.514	1
Mfhas1	0.0407999	0.204416	0.051	0.087	1
Arglu1	0.0411023	0.131527	0.082	0.129	1
Psmd3	0.0412338	0.0348427	0.365	0.51	1
Rpl41	0.0412527	0.336306	0.14	0.21	1
Sppl3	0.0412681	-0.133447	0.049	0.084	1
Lmod1	0.0412754	0.00604938	0.081	0.126	1
Clcnkb	0.041323	0.202536	0.048	0.084	1
Tmed5	0.0414436	0.163252	0.112	0.168	1
Add1	0.0414744	-0.0144952	0.089	0.136	1
Rtf2	0.0416631	0.266088	0.058	0.098	1
Ankrd11	0.0425151	0.188935	0.175	0.248	1
Rbm28	0.0425859	0.0875231	0.065	0.105	1
Hmgb1-ps2	0.0427837	-0.0269544	0.055	0.091	1
Git2	0.0429384	0.115035	0.131	0.192	1
Nop53	0.0431614	0.0915107	0.091	0.14	1
Rps13-ps6	0.0434428	0.372216	0.132	0.091	1
Adssl1	0.0439966	0.166947	0.089	0.136	1
Pld4	0.044323	0.0445652	0.41	0.552	1
Abcc3	0.0443315	0.114255	0.131	0.192	1
Ascl5	0.0444575	0.0682112	0.062	0.101	1
Snta1	0.0445439	0.176442	0.247	0.346	1
Hspa8	0.044863	-0.000909646	0.581	0.678	1
Kif21b	0.0448882	0.184997	0.08	0.126	1
Sirt7	0.0450276	0.201622	0.112	0.168	1
Maml3	0.0450847	0.212609	0.067	0.108	1
Reps2	0.0451518	0.0690919	0.374	0.462	1
Azin1	0.0451658	-0.0169559	0.044	0.077	1
Rplp0	0.0451906	0.0911129	0.33	0.437	1
Trim56	0.0452889	-0.109768	0.044	0.077	1
Cbln1	0.0459174	0.214694	0.065	0.105	1
Podn	0.046119	0.0936648	0.067	0.108	1
Ercc5	0.0461968	-0.00655204	0.066	0.105	1
Man1c1	0.0462129	0.06142	0.079	0.122	1
Hnrnpr	0.0462687	0.101815	0.062	0.101	1
Trir	0.046326	0.00938295	0.057	0.094	1
Tubgcp5	0.0464387	0.0535538	0.057	0.094	1
Eif2b2	0.0473272	0.119127	0.081	0.126	1
Tsc22d4	0.0475122	0.170595	0.103	0.154	1
Eif4a3	0.0475207	0.136647	0.057	0.094	1
Tpp1	0.0476397	0.0946307	0.147	0.213	1
Rpl10a-ps1	0.0478358	0.295193	0.146	0.213	1
Slc4a7	0.0479231	0.130433	0.067	0.108	1
Dazap2	0.0481109	0.314475	0.098	0.15	1
Gtf2h2	0.0482476	0.182913	0.131	0.192	1
Adcy7	0.0482663	0.179202	0.047	0.08	1
Cdc37	0.0483254	0.0889678	0.055	0.091	1
Pusl1	0.0487746	0.139024	0.081	0.126	1
Scn11a	0.0487762	0.0869328	0.047	0.08	1
Ppp4c	0.0489766	0.169143	0.057	0.094	1
Ddit3	0.0491271	0.0863312	0.037	0.066	1
Ptpn18	0.0492403	0.194085	0.049	0.084	1
Man2b1	0.0492643	0.00524992	0.33	0.437	1
Arhgdia	0.0493562	0.0718117	0.091	0.14	1
Hsp90aa1	0.0495067	0.0392156	0.437	0.556	1
Psmg1	0.0496766	0.177676	0.28	0.388	1
Rpl18a	0.0496827	-0.0320789	0.349	0.451	1
Hexim1	0.0497803	0.0780924	0.193	0.269	1
Gspt1	0.0500688	0.29729	0.117	0.175	1
Smad3	0.0502609	-0.0693485	0.061	0.098	1
Mtmr3	0.0503222	0.20285	0.049	0.084	1
Arhgap22	0.0504093	0.14384	0.057	0.094	1
Uba52	0.0504256	0.0782651	0.199	0.276	1
Slc46a3	0.0507203	0.191214	0.044	0.077	1
Lacc1	0.0507767	0.316294	0.062	0.101	1
Dennd1b	0.0507794	0.128901	0.081	0.126	1
Gga1	0.0508001	0.350589	0.09	0.14	1
Ube2l3	0.0509302	-0.0419773	0.105	0.154	1
Hif1an	0.0512933	0.247224	0.049	0.084	1
Narf	0.051752	0.122919	0.093	0.14	1
Epc1	0.0524054	0.237901	0.047	0.08	1
Rpl28	0.0524828	0.117357	0.156	0.217	1
Adrb2	0.0525127	-0.0800243	0.056	0.091	1
Golga3	0.0531494	-0.0601876	0.056	0.091	1
Ccn6	0.053527	-0.138716	0.043	0.073	1
Mfap1b	0.0537092	0.069556	0.08	0.122	1
Pik3cd	0.0546943	0.199103	0.076	0.119	1
Pcna	0.0548747	0.0890829	0.096	0.143	1
Vezf1	0.0552964	-0.0352478	0.056	0.091	1
Rpl31-ps13	0.055408	-0.0965305	0.051	0.084	1
Klf2	0.0554386	0.125658	0.095	0.143	1
Cnppd1	0.0554771	0.0857884	0.051	0.084	1
Tmed7	0.05552	0.0914671	0.069	0.108	1
Ttc7b	0.0555892	-0.16437	0.053	0.087	1
Larp4b	0.0555951	0.0527473	0.118	0.171	1
Rnf149	0.0557891	0.0533895	0.061	0.098	1
Cog5	0.0559142	0.226014	0.071	0.112	1
Hnrnpu	0.0560398	-0.00519636	0.414	0.549	1
Vwa5a	0.0561619	-0.19671	0.056	0.091	1
Pgm5	0.0561619	0.0911726	0.056	0.091	1
Tprg	0.0563057	0.0626559	0.256	0.35	1
Trim47	0.0563264	0.0757634	0.058	0.094	1
Tpp2	0.0564464	0.0647226	0.09	0.136	1
Lyg1	0.0565324	0.292143	0.181	0.259	1
Dennd5a	0.056683	0.0833189	0.053	0.087	1
Tulp4	0.0568559	-0.235041	0.057	0.091	1
Pik3ap1	0.0580629	-0.137829	0.093	0.136	1
Dnajc1	0.0581283	0.0843929	0.058	0.094	1
Ugt1a6a	0.0584217	0.0437918	0.038	0.066	1
Hnrnpul1	0.0586389	0.00366711	0.119	0.171	1
Cd180	0.0586401	0.104043	0.053	0.087	1
Cpd	0.0588593	-0.00405281	0.067	0.105	1
Tent5a	0.0589991	0.0444953	0.138	0.196	1
Mxi1	0.0594026	-0.0231737	0.041	0.07	1
Irf1	0.0595468	-0.09779	0.076	0.115	1
Slc25a11	0.0597664	0.0204632	0.067	0.105	1
Rgs22	0.0597966	0.0779544	0.048	0.08	1
Pbk	0.0600045	0.128276	0.291	0.395	1
Ablim1	0.0601086	0.338766	0.093	0.14	1
Arhgap25	0.0602488	0.0679817	0.085	0.129	1
Nbea	0.0602533	-0.349976	0.071	0.108	1
Bag6	0.0603566	0.081403	0.046	0.077	1
Keap1	0.0604431	-0.0831443	0.057	0.091	1
Lpcat1	0.0604465	0.101414	0.118	0.171	1
Ino80	0.0608833	-0.0124414	0.067	0.105	1
Bcl2a1b	0.0611702	-0.106977	0.062	0.098	1
Vdac3	0.0614594	0.296181	0.053	0.087	1
Ap1b1	0.0616463	0.290529	0.127	0.185	1
Nfkb2	0.0617763	0.0826408	0.038	0.066	1
Dytn	0.0618539	-0.00815485	0.423	0.573	1
Cd81	0.0626575	0.333965	0.593	0.647	1
Coro1a	0.0626874	0.323464	0.056	0.091	1
Hadha	0.0627227	0.320639	0.066	0.105	1
Oxgr1	0.0627617	0.226307	0.051	0.084	1
Ppcdc	0.0628617	0.286333	0.098	0.147	1
Rnaset2b	0.0630787	0.0447206	0.326	0.413	1
Gpatch8	0.0631077	0.192243	0.048	0.08	1
Gngt2	0.0633177	0.0347934	0.074	0.112	1
Mylip	0.0633234	0.264078	0.183	0.259	1
Nucks1	0.0634218	0.203013	0.072	0.112	1
Picalm	0.0638703	0.100364	0.349	0.483	1
Ppp6r3	0.0640279	0.199967	0.043	0.073	1
Ctbp1	0.0640428	0.30726	0.058	0.094	1
Exoc6	0.0643741	-0.00458568	0.06	0.094	1
Mboat2	0.065297	0.3588	0.093	0.14	1
Rad21	0.0653921	0.308418	0.053	0.087	1
Ap2s1	0.0654006	0.411375	0.126	0.182	1
Cd33	0.0656384	0.294919	0.119	0.175	1
Wipi2	0.0660027	0.262693	0.046	0.077	1
Elmod2	0.0660387	0.0868275	0.091	0.136	1
Sec13	0.0662888	0.279383	0.051	0.084	1
Suds3	0.0664881	0.219981	0.174	0.245	1
Fkbp2	0.0665088	0.192279	0.075	0.115	1
Cdc42	0.0665141	0.203788	0.218	0.304	1
Tbl1xr1	0.066781	0.251499	0.075	0.115	1
Myof	0.0673627	0.0803959	0.079	0.119	1
Washc4	0.067431	0.175898	0.086	0.129	1
Espl1	0.067555	0.116505	0.065	0.101	1
Errfi1	0.0680365	-0.0568284	0.052	0.084	1
Dpy19l4	0.0683457	0.119551	0.055	0.087	1
Cul1	0.0685749	0.541873	0.14	0.203	1
Upk1b	0.0689068	0.127554	0.055	0.087	1
Sirt2	0.0689873	-0.0128797	0.055	0.087	1
Ccdc152	0.0693653	0.193774	0.062	0.098	1
Evi2a	0.0696871	0.325774	0.151	0.217	1
Creld2	0.0699445	-0.0952542	0.044	0.073	1
Ube2e1	0.0711069	0.0401183	0.055	0.087	1
Lrba	0.0715663	0.274455	0.094	0.14	1
Tomm34	0.0717118	-0.0220072	0.069	0.105	1
Lhfpl2	0.0719217	0.226352	0.103	0.15	1
Nek6	0.072348	0.278057	0.075	0.115	1
Fcgrt	0.0724953	-0.0506232	0.094	0.136	1
Prpsap2	0.0729464	0.267701	0.07	0.108	1
Noa1	0.0730261	0.0992791	0.104	0.15	1
Tbxas1	0.0734409	0.244446	0.121	0.175	1
Lgals8	0.0735086	0.309099	0.062	0.098	1
Dicer1	0.0735337	0.142333	0.055	0.087	1
Arl1	0.0735673	0.32084	0.091	0.136	1
Plxdc1	0.0744718	0.198037	0.055	0.087	1
Scaf8	0.0747631	0.0358866	0.047	0.077	1
Akt1	0.0754186	0.138563	0.049	0.08	1
Parvb	0.0756009	0.199576	0.102	0.147	1
Rps6kb1	0.0756464	0.0270497	0.063	0.098	1
Rab11fip5	0.0762236	0.273191	0.079	0.119	1
Pip5k1c	0.0764188	0.135788	0.049	0.08	1
Clk2	0.0764676	-0.0578855	0.072	0.108	1
Oga	0.0767012	0.115891	0.133	0.189	1
Idh2	0.0767075	0.028488	0.066	0.101	1
Ncf4	0.0774581	0.0463426	0.042	0.07	1
Ulk2	0.0776835	-0.0620784	0.061	0.094	1
Krcc1	0.0778631	0.163838	0.071	0.108	1
Atp6v0d1	0.0779424	0.171881	0.047	0.077	1
Rplp1	0.0781923	0.19479	0.249	0.339	1
Nfs1	0.0783025	0.216211	0.074	0.112	1
Ddx23	0.0786578	0.269837	0.052	0.084	1
Gpx1	0.0790199	0.468161	0.117	0.171	1
Was	0.0790993	0.0744551	0.105	0.15	1
Slc9a9	0.0792105	0.0893052	0.11	0.157	1
Nap1l4	0.0794394	0.0652372	0.058	0.091	1
Rpl31-ps8	0.0795353	0.0235183	0.133	0.185	1
Gprasp1	0.0795809	0.311	0.055	0.087	1
Epc2	0.080065	0.108602	0.063	0.098	1
Gpr108	0.0801615	0.167931	0.034	0.059	1
Hebp1	0.0802643	0.229356	0.179	0.248	1
Ly6m	0.0803819	0.220214	0.188	0.259	1
Wdr37	0.0804219	0.0517938	0.066	0.101	1
Tbce	0.0807961	0.286248	0.105	0.154	1
Fam168a	0.0811406	-0.0972675	0.07	0.105	1
Rbm6	0.0822192	0.264688	0.079	0.119	1
Stat6	0.0828496	0.172135	0.102	0.147	1
Kcnf1	0.083017	0.482396	0.047	0.077	1
Smurf1	0.0830855	0.0273924	0.061	0.094	1
Rpl36	0.0831645	-0.0907508	0.048	0.077	1
Supt16	0.0832455	0.0229937	0.065	0.098	1
Vamp8	0.0839289	0.166508	0.121	0.171	1
Tgm1	0.0841384	0.0469098	0.477	0.647	1
Aars	0.0842389	0.243842	0.09	0.133	1
mt-Atp6	0.0844159	0.427316	0.42	0.43	1
Mtch1	0.0847097	0.153218	0.061	0.094	1
Znrf2	0.0847189	0.255721	0.066	0.101	1
Myc	0.0847383	0.0798495	0.17	0.231	1
Aif1	0.0849828	0.283466	0.24	0.329	1
Rpl6	0.0857224	0.163761	0.478	0.591	1
Clk3	0.0861222	-0.0455424	0.051	0.08	1
Atp5c1	0.0861544	0.102542	0.053	0.084	1
Eif3d	0.0865658	-0.0144024	0.046	0.073	1
Cdc5l	0.0866402	0.265347	0.082	0.122	1
Arhgap4	0.0873419	-0.0456956	0.098	0.14	1
Taldo1	0.0878838	0.0319985	0.062	0.094	1
Arhgap45	0.0879641	0.160733	0.4	0.552	1
P4hb	0.0880791	0.427069	0.183	0.262	1
Plk1	0.0881788	0.344403	0.143	0.203	1
Fscb	0.088259	0.0829238	0.048	0.077	1
Zfc3h1	0.0888293	0.114611	0.053	0.084	1
Ccn4	0.0892438	0.140786	0.147	0.203	1
Rilpl1	0.089932	0.0922895	0.072	0.108	1
Sytl1	0.0905789	0.11458	0.048	0.077	1
Trmt1l	0.0907679	0.378634	0.088	0.129	1
Cct4	0.0919301	0.111967	0.086	0.126	1
Elfn2	0.0922126	0.149548	0.31	0.423	1
Acte1	0.0922147	0.196696	0.308	0.416	1
Vps4b	0.0922831	0.047859	0.065	0.098	1
Baz2a	0.0923319	-0.0616231	0.052	0.08	1
Pwwp2a	0.0930286	0.0728693	0.062	0.094	1
Etfbl	0.0932926	0.0724796	0.046	0.073	1
Tcerg1l	0.0951005	0.2213	0.072	0.108	1
Eif4h	0.0951563	0.368022	0.082	0.122	1
9930111J21Rik1	0.0956027	0.112404	0.041	0.066	1
Tspan14	0.0974426	0.453357	0.115	0.168	1
Micos10	0.0982005	0.271521	0.043	0.07	1
Zmynd8	0.0984655	0.20969	0.086	0.126	1
Ighe	0.0989571	0.242438	0.204	0.276	1
Fam120b	0.0991475	0.27263	0.051	0.08	1
Pdgfb	0.0999008	0.168132	0.067	0.101	1
Evi5	0.100128	0.0995058	0.057	0.087	1
Odr4	0.100249	0.0644454	0.043	0.07	1
Nagpa	0.100807	0.182989	0.079	0.115	1
Parg	0.100851	0.00433531	0.069	0.101	1
Rassf4	0.100954	0.227423	0.081	0.119	1
Ung	0.101972	0.00184071	0.612	0.72	1
Cct8	0.101977	0.190818	0.081	0.119	1
Ddx54	0.10201	0.281461	0.067	0.101	1
Prelid1	0.10285	-0.296694	0.042	0.066	1
Naca	0.10335	0.417918	0.141	0.199	1
Smug1	0.103837	0.167099	0.159	0.217	1
Caap1	0.104521	0.187926	0.085	0.122	1
Acer3	0.104526	0.0627437	0.055	0.084	1
Lcp1	0.105621	0.155182	0.263	0.35	1
Ehmt1	0.105635	0.0188104	0.052	0.08	1
Pacsin2	0.105763	0.304668	0.11	0.157	1
Prkcsh	0.106938	-0.0488582	0.061	0.091	1
Myo18a	0.107518	0.0677934	0.071	0.105	1
Sar1a	0.107518	0.0772391	0.052	0.08	1
Tnnt3	0.107533	0.0568857	0.093	0.129	1
Ube2d3	0.108003	0.338289	0.192	0.262	1
Samd4	0.108889	0.0537305	0.049	0.077	1
Klhl6	0.109018	0.266666	0.057	0.087	1
Tcof1	0.109728	0.395757	0.067	0.101	1
Lrpap1	0.110008	0.263986	0.076	0.112	1
Hook2	0.111217	0.28181	0.142	0.196	1
Slc6a6	0.111272	0.433543	0.065	0.098	1
Brd1	0.111655	0.339178	0.079	0.115	1
Ftl1	0.11246	-0.0918594	0.523	0.619	1
Tnfrsf1a	0.112757	0.0483413	0.086	0.122	1
Slc35b2	0.113449	0.331674	0.093	0.133	1
Pde8b	0.114071	0.217339	0.052	0.08	1
Dync1li2	0.114255	0.36864	0.135	0.189	1
Hnrnph1	0.114671	0.244681	0.189	0.255	1
Rem2	0.114752	-0.10099	0.552	0.685	1
Laptm5	0.115033	-0.0498785	0.623	0.766	1
Ube2q1	0.11548	-0.138912	0.081	0.115	1
Cfh	0.115796	0.166391	0.339	0.441	1
Syngr2	0.116426	0.226367	0.151	0.203	1
Clec5a	0.116563	0.173083	0.047	0.073	1
Tapbp	0.116612	0.2824	0.145	0.199	1
Ppp1r15b	0.117093	0.203932	0.047	0.073	1
Mapk3	0.118196	0.302356	0.069	0.101	1
Stxbp5l	0.118341	0.0791257	0.042	0.066	1
Lrmp	0.118427	0.278662	0.047	0.073	1
Ankef1	0.118726	-0.0881803	0.051	0.077	1
Evl	0.119335	0.369644	0.088	0.126	1
Pum2	0.119601	0.360766	0.1	0.143	1
Uqcrc1	0.119615	0.0807195	0.042	0.066	1
Rpl27	0.119958	0.26901	0.18	0.241	1
Spns2	0.120263	0.415668	0.141	0.196	1
Ifnlr1	0.120789	0.227665	0.298	0.402	1
Polr3b	0.120929	0.0239735	0.039	0.063	1
Vps28	0.121131	0.222113	0.047	0.073	1
Ddx46	0.121198	0.198487	0.061	0.091	1
Pdia4	0.121213	0.214027	0.094	0.133	1
Prdx2	0.121372	0.0544235	0.039	0.063	1
Lsmem2	0.122243	0.3219	0.138	0.192	1
Gng10	0.122583	0.234808	0.082	0.119	1
Oaz1-ps	0.123022	0.416647	0.062	0.038	1
Prpf19	0.123978	0.349374	0.049	0.077	1
Ndufa8	0.124779	0.293976	0.044	0.07	1
Spred1	0.125573	0.102877	0.072	0.105	1
Rpl28-ps1	0.125985	0.0206871	0.085	0.119	1
Psmb6	0.127483	0.153996	0.058	0.087	1
Mydgf	0.128023	0.3824	0.063	0.094	1
Ctdsp1	0.128729	0.355479	0.069	0.101	1
Lgsn	0.131707	-0.0151793	0.496	0.643	1
Otud5	0.132586	0.144087	0.051	0.077	1
Mrps17	0.133297	0.0154723	0.048	0.073	1
Lrch4	0.134968	0.0156848	0.062	0.091	1
Med1	0.135219	0.33448	0.096	0.136	1
Pde5a	0.135478	0.124511	0.065	0.094	1
Slc38a1	0.135825	-0.142079	0.041	0.063	1
Akr1b3	0.136722	0.0462944	0.043	0.066	1
Zmpste24	0.137484	0.0935056	0.062	0.091	1
Ip6k1	0.137697	-0.0117931	0.046	0.07	1
Fam50a	0.138323	0.0809188	0.048	0.073	1
Mlxip	0.138547	0.346253	0.102	0.143	1
Cox4i1	0.139619	0.361825	0.128	0.175	1
Efhd2	0.139656	0.327312	0.253	0.343	1
Iffo1	0.140907	0.19901	0.081	0.115	1
Pigk	0.141037	-0.108245	0.052	0.077	1
Stip1	0.142214	0.247604	0.062	0.091	1
Syncrip	0.142415	0.387283	0.1	0.14	1
Elobl	0.143099	0.313222	0.098	0.136	1
Flad1	0.143175	0.144382	0.062	0.091	1
Mrm2	0.143297	0.133706	0.046	0.07	1
Trim30a	0.143981	0.115287	0.085	0.119	1
Rpl23a-ps3	0.144504	0.118207	0.074	0.105	1
Coa3	0.145043	0.315488	0.048	0.073	1
Tuba1a	0.145816	0.0191571	0.242	0.297	1
Polr2a	0.146001	0.135141	0.046	0.07	1
mt-Co3	0.14652	0.284162	0.642	0.706	1
Polg2	0.146641	0.422723	0.242	0.332	1
5031439G07Rik	0.146965	0.266668	0.046	0.07	1
Ythdf3	0.147548	0.188812	0.048	0.073	1
Sdhb	0.147646	-0.128232	0.052	0.077	1
Rgs10	0.149614	0.14866	0.42	0.573	1
Bnip3	0.149748	0.243006	0.082	0.115	1
Usp25	0.149901	0.124832	0.055	0.08	1
Acyp2	0.150316	0.347497	0.169	0.227	1
Ccdc93	0.150759	0.118951	0.082	0.115	1
Clstn2	0.150816	0.333822	0.067	0.098	1
Qk	0.151781	0.156398	0.36	0.476	1
Nudc	0.152364	0.00377071	0.036	0.056	1
Nhlrc2	0.152557	0.230316	0.041	0.063	1
Ctrb1	0.152856	0.0859953	0.069	0.098	1
Plgrkt	0.153861	-0.056314	0.058	0.084	1
9930111J21Rik2	0.154266	0.250128	0.214	0.276	1
Tlr4	0.15485	0.304456	0.046	0.07	1
Lgals9	0.155863	0.12305	0.093	0.126	1
Arap1	0.158032	0.431868	0.065	0.094	1
Npepps	0.158137	0.0204994	0.049	0.073	1
Slc40a1	0.158242	0.10073	0.055	0.08	1
Ptov1	0.158323	0.161528	0.052	0.077	1
Csnk1e	0.158542	0.155864	0.388	0.517	1
Tm9sf2	0.158658	0.192839	0.08	0.112	1
Mknk1	0.158796	0.383753	0.079	0.112	1
Supt5	0.159713	0.102312	0.063	0.091	1
Rbm27	0.161003	0.000183059	0.066	0.094	1
Srsf2	0.161073	0.0388542	0.312	0.392	1
Rpsa-ps10	0.161919	0.558577	0.135	0.108	1
Pkib	0.162703	0.271914	0.055	0.08	1
Efr3a	0.166204	0.263188	0.052	0.077	1
Dnase2a	0.166369	0.174732	0.049	0.073	1
Fam114a2	0.166415	0.572967	0.105	0.147	1
Tfe3	0.167535	0.415726	0.095	0.133	1
Cacybp	0.168261	0.217399	0.049	0.073	1
Mef2b	0.169306	0.141004	0.061	0.087	1
Iglc1	0.169623	0.0429877	0.061	0.087	1
Csf2ra	0.169781	0.216149	0.061	0.087	1
Lrrc3	0.170195	0.333335	0.127	0.171	1
Klhdc4	0.170342	0.221829	0.049	0.073	1
P4ha1	0.17144	0.15616	0.142	0.189	1
Tent2	0.171466	0.431397	0.074	0.105	1
Sparc	0.171906	-0.0721054	0.745	0.881	1
Rcbtb2	0.172085	0.169779	0.109	0.147	1
Commd9	0.173504	0.289201	0.199	0.262	1
9930021J03Rik	0.174635	0.228647	0.047	0.07	1
Snx2	0.175427	0.320684	0.063	0.091	1
Tinagl1	0.175519	0.306831	0.138	0.185	1
Mvb12b	0.176461	0.273908	0.047	0.07	1
Usp4	0.177564	0.198065	0.047	0.07	1
Ubqln1	0.177857	0.40733	0.055	0.08	1
Son	0.178802	0.0589306	0.5	0.65	1
Fam168b	0.178962	0.370207	0.063	0.091	1
Elmo3	0.17911	0.15348	0.056	0.08	1
Gsta1	0.179168	0.218377	0.058	0.084	1
Rab5a	0.179816	-0.117101	0.051	0.073	1
Mtdh	0.181365	0.152112	0.358	0.472	1
Map4	0.182047	0.218245	0.058	0.084	1
Ctsc	0.182707	0.195384	0.307	0.399	1
Akap8	0.184491	0.452718	0.227	0.308	1
Eif5a	0.185641	-0.0322795	0.037	0.056	1
Ubr4	0.186525	0.368019	0.063	0.091	1
Mfsd1	0.187764	0.182772	0.09	0.122	1
Hsph1	0.188196	0.0975054	0.065	0.091	1
Ino80d	0.188428	0.201936	0.051	0.073	1
Uhrf1bp1l	0.188635	0.258205	0.053	0.077	1
Cd300a	0.1892	0.255154	0.093	0.126	1
Fkbp5	0.189636	0.19037	0.039	0.059	1
Ddi2	0.190867	0.273064	0.081	0.112	1
Inmt	0.191709	-0.0146933	0.074	0.101	1
Ripk1	0.192713	0.0400273	0.048	0.07	1
Rpl31-ps12	0.194715	-0.0460303	0.08	0.108	1
Rpl27a-ps2	0.196242	0.348608	0.057	0.038	1
Atp8a2	0.196555	0.17621	0.074	0.101	1
Zcchc7	0.197203	0.260518	0.065	0.091	1
Rpsa-ps2	0.198307	0.319463	0.061	0.042	1
Grk2	0.198323	0.316827	0.135	0.178	1
Plekhb2	0.198662	0.0549152	0.06	0.084	1
Hnrnph2	0.199469	0.170609	0.051	0.073	1
Sft2d1	0.199614	0.416447	0.192	0.252	1
Rps2-ps10	0.200732	-0.088281	0.151	0.182	1
Ttf1	0.201843	0.248378	0.046	0.066	1
Eif4a2	0.201929	0.248466	0.198	0.259	1
Cep250	0.202151	0.0655352	0.066	0.091	1
Stard9	0.202338	0.564184	0.127	0.171	1
Tmem176a	0.204675	0.26888	0.088	0.119	1
Ctr9	0.205562	0.341353	0.051	0.073	1
Nisch	0.2059	0.328003	0.121	0.161	1
G3bp1	0.206726	0.32095	0.062	0.087	1
Gmeb2	0.206774	0.188488	0.199	0.259	1
Fcer1g	0.207807	0.202317	0.383	0.514	1
Prdx5	0.20835	-0.134238	0.058	0.08	1
Slc15a4	0.211598	0.338338	0.048	0.07	1
Tubb2a	0.211968	0.178791	0.084	0.112	1
0610040J01Rik	0.212278	0.159602	0.043	0.063	1
Zfp740	0.214742	0.18119	0.057	0.08	1
Fbxo11	0.215132	0.209809	0.057	0.08	1
Slc26a2	0.215586	0.127	0.043	0.063	1
Maf	0.21723	-0.0363729	0.594	0.731	1
Arf1	0.217332	0.409486	0.148	0.196	1
Mindy2	0.217676	0.273863	0.094	0.126	1
Rpl17-ps5	0.220642	0.214545	0.152	0.126	1
mt-Nd2	0.221187	0.305506	0.279	0.367	1
Eef1a1	0.222762	0.0636769	0.56	0.685	1
Ppp1r14b	0.228344	0.181573	0.061	0.084	1
Rab7b	0.229824	0.150602	0.049	0.07	1
Emc3	0.230676	-0.137695	0.067	0.091	1
Mrps24	0.231906	0.203436	0.072	0.098	1
Tpi1	0.2324	0.0191944	0.056	0.077	1
Ccnd1	0.237373	0.338007	0.057	0.08	1
Lsm14a	0.239336	0.284988	0.052	0.073	1
mt-Cytb	0.239676	0.294561	0.282	0.367	1
Rsf1	0.23971	0.382469	0.264	0.343	1
Gsg1l	0.241228	0.0471417	0.586	0.748	1
Styx	0.241727	0.302338	0.07	0.094	1
Srp54a	0.242278	0.211606	0.084	0.112	1
Rps16-ps2	0.242474	0.232484	0.141	0.182	1
Cflar	0.24562	0.157984	0.117	0.15	1
Mpc1	0.246021	0.56228	0.069	0.094	1
Piezo1	0.24674	0.133265	0.047	0.066	1
[truncated: 268 more rows]

## Sheet: DEG_MP_vs_Ctrl
	p_val	avg_log2FC	pct.1	pct.2	p_val_adj
Hspa1a	1.15813e-25	2.31028	0.485	0.189	2.63012e-22
Hspa1b	4.97581e-17	2.64674	0.255	0.035	1.13001e-13
Gps1	1.428e-11	-0.771543	0.1	0.255	3.24299e-08
Lars2	1.43135e-11	-0.600713	0.418	0.671	3.25059e-08
Ep300	4.03727e-11	-0.884446	0.087	0.227	9.16865e-08
Map4k4	1.08675e-09	-0.422656	0.167	0.35	2.468e-06
Sbk1	1.53876e-09	-0.808026	0.142	0.297	3.49451e-06
Apbb1ip	3.02305e-09	-0.5157	0.203	0.388	6.86535e-06
Pik3r1	7.66038e-09	-0.440358	0.182	0.364	1.73967e-05
Gadd45b	8.43022e-09	1.66987	0.279	0.136	1.9145e-05
Oas1b	1.00028e-08	-0.506149	0.033	0.115	2.27163e-05
Etnk1	1.0413e-08	-0.420806	0.061	0.168	2.36479e-05
Rnf13	1.27036e-08	-0.370357	0.119	0.266	2.88499e-05
Jund	2.13625e-08	-0.573114	0.171	0.329	4.85143e-05
Pde1b	2.27718e-08	-0.351794	0.225	0.42	5.17148e-05
Cux1	2.87744e-08	-0.630796	0.075	0.185	6.53466e-05
Klf6	3.99139e-08	-0.418996	0.255	0.448	9.06445e-05
Tmem50a	6.16522e-08	-0.332716	0.163	0.325	0.000140012
Paip2b	6.44909e-08	-0.467403	0.039	0.122	0.000146459
Spag9	6.70309e-08	-0.603539	0.074	0.182	0.000152227
Zfp638	1.19392e-07	-0.435835	0.129	0.269	0.000271138
Gvin1	1.31771e-07	-0.456797	0.092	0.206	0.000299252
Il6st	1.38903e-07	-0.303781	0.134	0.276	0.00031545
Crlf3	1.41491e-07	-0.36763	0.096	0.217	0.000321326
Hnrnpa1	1.50104e-07	-0.0713911	0.096	0.217	0.000340886
Tmcc3	1.92146e-07	-0.310648	0.086	0.199	0.000436364
N4bp1	1.97374e-07	-0.43929	0.072	0.175	0.000448237
Rif1	1.97916e-07	-0.609987	0.058	0.15	0.000449468
Hdlbp	2.3672e-07	-0.445195	0.123	0.252	0.000537592
Tmem63a	2.54943e-07	-0.266274	0.106	0.231	0.000578974
Clint1	3.14668e-07	-0.620159	0.074	0.175	0.000714611
Mmp1a	4.52848e-07	-0.504772	0.066	0.161	0.00102842
Tcf25	5.113e-07	-0.353273	0.13	0.262	0.00116116
Cd164	5.25292e-07	-0.238169	0.206	0.374	0.00119294
Zfp36l2	6.44491e-07	-0.397655	0.177	0.325	0.00146364
Tarsl2	6.64911e-07	-0.197148	0.053	0.14	0.00151001
Srrm2	7.58497e-07	-0.310464	0.338	0.538	0.00172255
Arl4c	8.25942e-07	-0.39512	0.192	0.343	0.00187571
Rnf19b	8.3464e-07	-0.228285	0.095	0.206	0.00189547
Erap1	9.31082e-07	-0.342369	0.04	0.115	0.00211449
Hsp90aa1	9.64188e-07	0.864397	0.617	0.556	0.00218967
Ubash3b	1.01892e-06	-0.497293	0.097	0.206	0.00231397
Taf1b	1.12334e-06	-0.662098	0.036	0.105	0.0025511
Ets1	1.15902e-06	-0.410303	0.1	0.21	0.00263214
Ptprc	1.17107e-06	-0.354496	0.268	0.448	0.00265951
Hnrnpul2	1.17325e-06	-0.366081	0.096	0.206	0.00266444
Tpd52	1.32966e-06	-0.604287	0.061	0.147	0.00301966
Cd2ap	1.34137e-06	-0.207525	0.137	0.269	0.00304624
Tsc22d3	1.51804e-06	-0.424453	0.077	0.175	0.00344746
Atl3	1.55068e-06	-0.277951	0.062	0.15	0.0035216
Swap70	1.55719e-06	-0.231282	0.053	0.136	0.00353637
Dhx9	1.59473e-06	-0.455809	0.1	0.21	0.00362162
Ifnar2	1.61822e-06	-0.341194	0.127	0.248	0.00367498
Rsl1d1	1.79124e-06	-0.522733	0.058	0.143	0.0040679
Ndufb7	1.91847e-06	-0.539784	0.058	0.143	0.00435685
Tm9sf3	2.38018e-06	-0.172826	0.126	0.252	0.00540538
Celf2	2.69589e-06	-0.191725	0.154	0.29	0.00612236
Scgb3a2	2.7061e-06	-0.280388	0.174	0.318	0.00614555
Pabpn1l	2.92605e-06	-0.245796	0.124	0.241	0.00664505
Dido1	2.97677e-06	-0.321265	0.047	0.122	0.00676025
Nrip1	2.97916e-06	-0.345977	0.215	0.371	0.00676566
Npc1	3.27615e-06	-0.38919	0.068	0.157	0.00744015
2610507B11Rik	3.33938e-06	-0.46887	0.047	0.122	0.00758373
Arsg	3.34368e-06	-0.483297	0.149	0.273	0.00759351
Hsd17b4	3.37827e-06	-0.372832	0.077	0.171	0.00767205
Arhgap5	3.41488e-06	-0.325733	0.313	0.497	0.00775519
Tacc1	3.64545e-06	-0.24853	0.159	0.297	0.00827882
Cep170	3.77579e-06	-0.400065	0.062	0.147	0.00857483
Usp7	4.15755e-06	-0.43779	0.101	0.206	0.00944179
Tjp1	4.57498e-06	-0.674416	0.097	0.196	0.0103898
Zc3h7a	4.90397e-06	-0.469563	0.118	0.231	0.0111369
Rgl3	5.08591e-06	-0.328719	0.094	0.196	0.0115501
Tbc1d17	5.15695e-06	-0.18838	0.058	0.14	0.0117114
Alx1	5.17587e-06	-0.449343	0.044	0.115	0.0117544
Nfkb1	5.73975e-06	-0.386495	0.083	0.178	0.013035
Sf3b2	5.74292e-06	-0.327953	0.166	0.297	0.0130422
Sh3yl1	5.82146e-06	-0.279943	0.199	0.35	0.0132205
Cd37	6.38691e-06	-0.297859	0.114	0.224	0.0145047
Zdhhc20	6.60679e-06	-0.490403	0.071	0.157	0.015004
Ywhaz	6.66182e-06	-0.227083	0.152	0.28	0.015129
Dnajb11	7.13546e-06	-0.262188	0.051	0.126	0.0162046
Irf3	7.25754e-06	-0.270172	0.062	0.143	0.0164819
Lrrfip1	7.4358e-06	-0.351152	0.055	0.133	0.0168867
Tgfbr1	7.6309e-06	-0.260485	0.469	0.682	0.0173298
Pou2f2	7.68295e-06	-0.206671	0.161	0.294	0.017448
Tlr1	7.68573e-06	-0.561523	0.12	0.227	0.0174543
Ktn1	8.2542e-06	-0.350135	0.14	0.262	0.0187453
Aftph	9.15256e-06	-0.247116	0.116	0.227	0.0207855
Dclk2	9.38376e-06	-0.330389	0.137	0.255	0.0213105
Atp1a1	9.4457e-06	-0.425702	0.043	0.112	0.0214512
Nr3c1	9.5999e-06	-0.388187	0.163	0.29	0.0218014
Brwd1	9.81469e-06	-0.561216	0.084	0.175	0.0222892
Anxa3	1.00297e-05	-0.24402	0.155	0.287	0.0227775
Cpne2	1.01025e-05	-0.187721	0.18	0.322	0.0229427
Prpf38b	1.01256e-05	-0.397721	0.148	0.266	0.0229952
Prpf39	1.02894e-05	-0.200154	0.08	0.171	0.0233671
Gng3	1.03197e-05	-0.322825	0.069	0.154	0.0234361
Bbs1	1.1969e-05	-0.383246	0.046	0.115	0.0271815
Usp34	1.20761e-05	-0.402936	0.103	0.203	0.0274247
Cpt1b	1.24732e-05	-0.136046	0.118	0.231	0.0283266
Tmed10	1.25706e-05	-0.244831	0.148	0.269	0.0285479
Dnttip2	1.25926e-05	-0.621323	0.055	0.129	0.0285978
Cdk11b	1.25987e-05	-0.36295	0.081	0.171	0.0286116
Suco	1.27154e-05	-0.500333	0.073	0.157	0.0288767
Nsd3	1.27955e-05	-0.217161	0.073	0.161	0.0290586
Dock10	1.38027e-05	-0.35395	0.228	0.378	0.0313458
Snf8	1.39612e-05	-0.315219	0.073	0.157	0.0317059
Zmiz1	1.40537e-05	-0.173482	0.11	0.217	0.0319159
AC149090.1	1.42631e-05	-0.293403	0.118	0.227	0.0323914
Lingo1	1.43564e-05	-0.418156	0.108	0.21	0.0326034
Rassf2	1.46416e-05	-0.338045	0.088	0.182	0.0332511
Bclaf1	1.4824e-05	-0.24022	0.153	0.28	0.0336654
Srp72	1.48575e-05	-0.351641	0.087	0.178	0.0337414
Rapgef5	1.50169e-05	-0.289721	0.151	0.269	0.0341034
Erp29	1.54332e-05	-0.317578	0.195	0.332	0.0350488
Hnrnpa2b1	1.57313e-05	-0.171665	0.323	0.51	0.0357257
Atrx	1.62126e-05	-0.269865	0.169	0.297	0.0368189
Copa	1.69512e-05	-0.19945	0.155	0.28	0.0384963
Aff4	1.77992e-05	-0.344027	0.101	0.199	0.0404219
Nktr	1.79026e-05	-0.331634	0.129	0.241	0.0406567
Clip1	1.79192e-05	-0.518426	0.097	0.192	0.0406946
Tfb1m	1.81874e-05	-0.281596	0.163	0.287	0.0413035
Abhd12	1.8462e-05	-0.299196	0.223	0.371	0.0419272
Serpinb2	1.92996e-05	-0.223562	0.253	0.413	0.0438295
Camk1g	1.98486e-05	-0.2481	0.118	0.227	0.0450761
Lactb	2.00936e-05	-0.233998	0.047	0.115	0.0456325
Fuca1	2.02331e-05	-0.330351	0.083	0.171	0.0459495
Luc7l2	2.06768e-05	-0.298921	0.145	0.262	0.0469569
Ctdspl2	2.22385e-05	-0.391807	0.056	0.129	0.0505036
Frrs1	2.26775e-05	-0.382069	0.047	0.115	0.0515007
Brd7	2.3075e-05	-0.365917	0.047	0.115	0.0524034
Map7d1	2.39709e-05	-0.382128	0.074	0.157	0.0544379
Cntrob	2.40291e-05	-0.324115	0.141	0.255	0.0545701
Sort1	2.53839e-05	-0.234278	0.078	0.164	0.0576468
Ptprs	2.55728e-05	-0.139327	0.178	0.315	0.0580758
Lpin2	2.61011e-05	-0.304606	0.176	0.304	0.0592755
Nars	2.63161e-05	-0.313081	0.181	0.308	0.0597639
Pip4k2a	2.69239e-05	-0.347353	0.226	0.367	0.0611443
Man2a2	2.69315e-05	-0.415773	0.079	0.164	0.0611614
Ints6	2.74861e-05	-0.384764	0.148	0.262	0.0624209
Adam17	2.82043e-05	-0.273042	0.155	0.276	0.064052
Retreg1	2.97881e-05	-0.392512	0.099	0.192	0.0676489
Slc12a2	3.04533e-05	-0.357677	0.133	0.241	0.0691595
Fblim1	3.05059e-05	-0.255765	0.156	0.276	0.0692789
Erbin	3.10851e-05	-0.358543	0.091	0.182	0.0705944
Nav3	3.20658e-05	-0.259975	0.185	0.311	0.0728215
Rtn4rl1	3.23045e-05	-0.0978478	0.119	0.227	0.0733635
Slx4	3.31617e-05	-0.25975	0.129	0.238	0.0753102
Ogfrl1	3.33101e-05	-0.344573	0.103	0.199	0.0756472
Arl6ip1	3.34824e-05	-0.26855	0.157	0.276	0.0760385
Tnrc6b	3.50617e-05	-0.0892859	0.118	0.224	0.0796251
Nptn	3.59385e-05	-0.254476	0.147	0.262	0.0816163
Rabgap1l	3.62333e-05	-0.227219	0.07	0.15	0.0822858
Usp35	3.63785e-05	-0.174072	0.054	0.126	0.0826157
Cntd1	3.70508e-05	-0.310929	0.066	0.143	0.0841423
Fbxw11	3.70881e-05	-0.448858	0.044	0.108	0.0842271
Usf1	3.72227e-05	-0.285809	0.113	0.213	0.0845327
Tnfrsf21	3.76378e-05	-0.223113	0.081	0.168	0.0854755
Dpysl2	3.79038e-05	-0.262105	0.077	0.161	0.0860795
Dnajb6	3.83706e-05	-0.261853	0.079	0.161	0.0871396
Cdk12	3.96405e-05	-0.548083	0.056	0.126	0.0900236
Smagp	4.08665e-05	-0.169687	0.096	0.189	0.0928079
Hspb3	4.16731e-05	-0.493941	0.039	0.098	0.0946395
Med13	4.16905e-05	-0.154115	0.156	0.276	0.0946792
Rtl4	4.21109e-05	-0.436697	0.127	0.231	0.0956338
Gatad2b	4.23562e-05	-0.334358	0.058	0.129	0.0961909
Gng4	4.25923e-05	-0.6404	0.058	0.129	0.096727
Usp48	4.70216e-05	-0.31266	0.092	0.182	0.106786
Tor1aip1	4.80669e-05	-0.126095	0.137	0.248	0.10916
Brd4	4.90209e-05	-0.147791	0.12	0.224	0.111326
Soga1	4.96294e-05	-0.270502	0.333	0.51	0.112708
Phf14	5.02007e-05	-0.163888	0.126	0.231	0.114006
Spcs2	5.10301e-05	-0.182896	0.099	0.192	0.115889
Adgrb1	5.16617e-05	-0.286805	0.29	0.448	0.117324
Hps4	5.29443e-05	-0.379149	0.075	0.154	0.120236
Zfp991	5.40018e-05	-0.171836	0.069	0.147	0.122638
Ddx42	5.41705e-05	-0.330754	0.077	0.157	0.123021
I830077J02Rik	5.50684e-05	-0.34148	0.047	0.112	0.12506
Ythdc1	5.60346e-05	-0.0311219	0.139	0.252	0.127255
Zbtb18	5.89511e-05	-0.219047	0.071	0.15	0.133878
Deup1	5.9404e-05	-0.235075	0.181	0.304	0.134906
Prdm2	6.06264e-05	-0.365902	0.073	0.15	0.137683
Fgd2	6.16071e-05	-0.268619	0.227	0.367	0.13991
Arid1a	6.22377e-05	-0.237416	0.107	0.203	0.141342
Usp2	6.2428e-05	-0.277606	0.13	0.234	0.141774
Timp2	6.24402e-05	-0.238033	0.262	0.413	0.141802
Fam49b	6.25281e-05	-0.224407	0.167	0.287	0.142001
Fam102b	6.30352e-05	-0.190558	0.221	0.364	0.143153
Il10ra	6.42332e-05	-0.250128	0.264	0.416	0.145874
Aox2	6.61695e-05	-0.424481	0.051	0.115	0.150271
Apcs	6.64371e-05	-0.217966	0.096	0.185	0.150879
Atp6ap2	6.68158e-05	-0.111489	0.081	0.164	0.151739
Arhgap27	6.75166e-05	-0.41461	0.052	0.119	0.15333
Myo9a	6.96197e-05	-0.312635	0.068	0.143	0.158106
Pbk	7.38318e-05	-0.240792	0.254	0.395	0.167672
Tdo2	7.41772e-05	-0.201106	0.063	0.136	0.168457
Itpr2	7.47837e-05	-0.164937	0.198	0.329	0.169834
Myo1e	7.48592e-05	-0.287639	0.406	0.591	0.170005
Matr3	7.56281e-05	-0.241518	0.102	0.192	0.171751
Hck	7.7131e-05	-0.237166	0.089	0.175	0.175164
Cd83	7.74673e-05	-0.167187	0.043	0.105	0.175928
Plxna4	7.80705e-05	-0.578277	0.054	0.119	0.177298
Cd14	7.83361e-05	-0.416474	0.094	0.178	0.177901
Nxf1	7.99971e-05	-0.422332	0.051	0.115	0.181673
Romo1	8.03987e-05	-0.230134	0.263	0.416	0.182585
Abcd2	8.2672e-05	-0.060781	0.063	0.136	0.187748
Mlc1	8.2848e-05	-0.19978	0.278	0.437	0.188148
Abcd3	8.5209e-05	-0.264754	0.129	0.231	0.19351
Mfsd1	8.53183e-05	-0.299935	0.055	0.122	0.193758
Arap3	9.09161e-05	-0.268961	0.085	0.168	0.20647
Psmb3	9.21369e-05	-0.362014	0.104	0.192	0.209243
Tpst2	9.21487e-05	-0.30354	0.115	0.21	0.20927
Sirpa	9.24196e-05	-0.32292	0.418	0.58	0.209885
Donson	9.4827e-05	-0.240913	0.105	0.196	0.215352
Macf1	9.48919e-05	-0.29542	0.539	0.71	0.2155
Phf3	9.57449e-05	-0.0224841	0.098	0.189	0.217437
Dnajc8	9.57999e-05	-0.714733	0.048	0.108	0.217562
Znf41-ps	9.64077e-05	-0.0506855	0.053	0.119	0.218942
Hsp90ab1	9.66231e-05	0.570842	0.617	0.598	0.219431
Tnrc18	9.67187e-05	-0.261011	0.058	0.126	0.219648
Pdia6	9.93025e-05	-0.15399	0.18	0.308	0.225516
Rock2	9.96838e-05	-0.169713	0.206	0.336	0.226382
Fxr1	0.000100487	-0.184244	0.08	0.161	0.228206
Rpsa	0.000100862	-0.177245	0.273	0.399	0.229058
Ubr5	0.00010102	-0.347983	0.077	0.154	0.229417
Ldhb	0.000101187	-0.0706811	0.244	0.392	0.229796
Usp8	0.000101685	-0.308897	0.135	0.238	0.230928
Psma6	0.000102346	-0.50302	0.062	0.129	0.232427
Gpat4	0.000105378	-0.340381	0.047	0.108	0.239313
Ncoa3	0.000107498	-0.138274	0.084	0.168	0.244128
Kidins220	0.000108248	-0.276466	0.04	0.098	0.245832
Taf7	0.000109293	-0.0637274	0.062	0.133	0.248205
Atox1	0.000109544	-0.107338	0.07	0.147	0.248775
Dip2b	0.000110943	-0.176972	0.138	0.245	0.251952
Ctbp2	0.000113705	-0.211706	0.079	0.157	0.258223
Ndfip1	0.000113791	-0.289052	0.077	0.154	0.258419
Uba5	0.000114758	-0.335056	0.056	0.122	0.260616
Snx5	0.000114872	-0.107006	0.258	0.409	0.260873
Chd9	0.000115109	-0.135813	0.201	0.329	0.261412
Ash1l	0.000117434	-0.235255	0.146	0.252	0.266693
Nav2	0.000118171	-0.424271	0.047	0.108	0.268365
Atmin	0.000118826	-0.379244	0.045	0.105	0.269854
Kmt2a	0.000119469	-0.298773	0.151	0.255	0.271313
Rhog	0.000120443	-0.277455	0.529	0.699	0.273526
Ucp2	0.000120559	-0.325404	0.061	0.129	0.27379
Eif3c	0.000123581	-0.0760993	0.14	0.248	0.280653
Tram2	0.000123864	-0.226332	0.182	0.301	0.281295
Itga9	0.000127034	-0.244085	0.072	0.147	0.288494
Fcho2	0.000128858	-0.34259	0.092	0.175	0.292637
Hnrnpk	0.00012948	-0.104827	0.224	0.36	0.294049
Leap2	0.00013188	-0.310298	0.201	0.325	0.299498
Zfand6	0.000137004	-0.254765	0.05	0.112	0.311137
Srsf6	0.000138615	-0.29102	0.112	0.203	0.314795
Pank2	0.000139386	-0.0993687	0.123	0.224	0.316546
Kif1b	0.000139516	-0.292294	0.052	0.115	0.316841
Tcp1	0.000142845	-0.316323	0.057	0.122	0.324402
Rab8b	0.000143921	-0.245542	0.071	0.143	0.326844
Pum2	0.000144862	-0.00399039	0.069	0.143	0.328981
Itpripl1	0.000146279	-0.238694	0.052	0.115	0.332199
Nlrp1b	0.000150066	-0.125801	0.219	0.35	0.340801
Rogdi	0.000152672	0.0129467	0.076	0.154	0.346718
Ptpn6	0.000153049	-0.157837	0.216	0.346	0.347575
Scarb2	0.000155337	-0.153801	0.164	0.276	0.352771
Camk2d	0.000155427	-0.238222	0.05	0.112	0.352974
Cspg4	0.000156579	-0.316902	0.11	0.203	0.35559
BC005537	0.000158479	-0.0900028	0.157	0.269	0.359905
Lcp2	0.000158887	-0.19094	0.109	0.199	0.360833
Ogfr	0.000161867	-0.264209	0.046	0.105	0.3676
Capza1	0.000161887	-0.122187	0.064	0.133	0.367645
Hltf	0.000163302	-0.160024	0.073	0.147	0.370859
Ncf2	0.000165096	-0.0624912	0.149	0.259	0.374932
Rock1	0.000165854	-0.197367	0.17	0.283	0.376654
Tbx4	0.000167689	-0.28662	0.175	0.29	0.380823
Kansl1	0.000168181	-0.280996	0.071	0.143	0.381938
Tram1	0.000168592	-0.308771	0.073	0.147	0.382873
Psmd12	0.000169426	-0.0611311	0.066	0.136	0.384766
Dnajc3	0.000170385	-0.226496	0.118	0.213	0.386945
Palm3	0.000175082	-0.275403	0.132	0.227	0.397612
Srrt	0.000179251	-0.323532	0.118	0.21	0.407079
Fnbp4	0.000180148	0.00531063	0.09	0.175	0.409115
Engase	0.000180777	-0.213414	0.139	0.238	0.410544
Sbno2	0.000182772	-0.238877	0.081	0.157	0.415075
Hyou1	0.000183712	-0.314918	0.046	0.105	0.417209
Map3k3	0.000185627	-0.15886	0.059	0.126	0.421559
Arl8b	0.000187125	-0.427653	0.072	0.143	0.424961
Prpf4	0.000193112	-0.0738522	0.126	0.224	0.438558
Sdc1	0.000193464	-0.415333	0.051	0.112	0.439356
Gigyf2	0.000195146	-0.426202	0.049	0.108	0.443176
Rpl7a	0.000197802	-0.305635	0.187	0.287	0.449207
Larp1	0.000202939	-0.336735	0.065	0.133	0.460875
Zmym2	0.000207721	-0.299325	0.227	0.357	0.471734
Setd2	0.0002086	-0.329925	0.133	0.231	0.47373
Sox18	0.000209139	-0.0376713	0.155	0.269	0.474955
Mef2c	0.000212994	-0.197885	0.305	0.458	0.48371
Acin1	0.000214175	-0.148271	0.215	0.346	0.486391
Alg2	0.000221963	-0.227499	0.189	0.308	0.504077
Ddx3x	0.000224067	-0.246703	0.328	0.476	0.508856
Zfp36	0.000227326	-0.136237	0.23	0.36	0.516257
Cldn8	0.000228235	-0.160027	0.103	0.189	0.518323
Gcc2	0.000229575	-0.118901	0.042	0.098	0.521366
Rala	0.000230884	-0.0968755	0.051	0.112	0.524339
Hnrnpd	0.000230996	-0.169868	0.256	0.395	0.524593
Zfp106	0.000239226	-0.381278	0.066	0.133	0.543282
Peli1	0.000240868	-0.0829917	0.124	0.22	0.547012
Fam91a1	0.000242027	-0.186016	0.134	0.231	0.549643
Zfp62	0.000248496	-0.129117	0.058	0.122	0.564334
Wnk1	0.000251582	-0.216321	0.218	0.346	0.571344
Scaf11	0.000254469	-0.259241	0.174	0.283	0.5779
Dgkd	0.000258076	-0.121353	0.107	0.196	0.58609
Hdac1	0.000258154	-0.286039	0.071	0.14	0.586267
Cpz	0.000260633	-0.0985295	0.152	0.259	0.591898
Exoc5	0.000261825	-0.113825	0.088	0.168	0.594605
Rnls	0.000263585	-0.212507	0.17	0.283	0.598602
Snx6	0.000264707	-0.258833	0.115	0.203	0.60115
Pde6g	0.000267399	-0.270921	0.043	0.098	0.607264
Sh2b3	0.000280973	-0.242901	0.082	0.157	0.638091
Canx	0.000283817	-0.138015	0.363	0.538	0.644549
Ier3	0.000285258	-0.369815	0.05	0.108	0.647821
Mecp2	0.000285707	-0.295208	0.315	0.462	0.64884
Alox5ap	0.000286797	-0.0221	0.116	0.21	0.651316
Stt3a	0.000290083	-0.341575	0.052	0.112	0.658778
Casp3	0.00029107	-0.0492462	0.156	0.266	0.661021
Eif4g1	0.000296707	-0.156534	0.129	0.224	0.673821
Tfg	0.000299607	-0.156739	0.11	0.199	0.680408
Usp15	0.000310253	-0.322749	0.041	0.094	0.704585
Wdfy1	0.000319183	-0.147453	0.058	0.122	0.724864
Sptlc2	0.000327277	-0.385398	0.059	0.122	0.743247
Surf4	0.000330783	-0.251887	0.057	0.119	0.751209
Cct2	0.000331388	-0.2065	0.167	0.276	0.752581
Arhgdib	0.000334417	-0.0388142	0.074	0.147	0.759462
Gip	0.000334955	-0.222936	0.144	0.241	0.760683
BC035044	0.000335941	-0.24265	0.041	0.094	0.762923
Frmd4b	0.000337717	-0.139685	0.112	0.199	0.766955
Acap2	0.000343102	-0.457596	0.112	0.196	0.779185
Metap2	0.000344043	-0.334833	0.094	0.171	0.781322
Trip12	0.000348148	-0.393411	0.101	0.182	0.790645
Pcnp	0.000352155	-0.234993	0.054	0.115	0.799745
Rab14	0.000353391	-0.142798	0.17	0.28	0.80255
Acaa1a	0.00036048	-0.0868495	0.054	0.115	0.81865
Atf7ip	0.000360514	-0.189657	0.059	0.122	0.818727
Ppp4r2	0.000364953	-0.052594	0.066	0.133	0.828807
Wdfy2	0.000370278	-0.325514	0.069	0.136	0.840902
Ptprj	0.000371753	-0.401272	0.097	0.175	0.844251
Dgke	0.000372785	-0.0305277	0.115	0.206	0.846595
Ewsr1	0.000375282	-0.137275	0.117	0.206	0.852266
Ddx50	0.000376197	-0.193607	0.076	0.147	0.854344
Tulp4	0.00037621	-0.632877	0.04	0.091	0.854372
Trim26	0.000378056	-0.160137	0.059	0.122	0.858565
Kif21b	0.000381613	-0.132992	0.062	0.126	0.866643
Hk3	0.000381684	-0.0672206	0.147	0.248	0.866805
Smox	0.000390283	-0.193451	0.064	0.129	0.886332
Adnp	0.000396172	-0.342712	0.069	0.133	0.899707
Pip4p1	0.000400263	-0.380752	0.073	0.14	0.908997
Eprs	0.000407377	-0.244511	0.079	0.15	0.925153
Urm1	0.000411127	-0.338147	0.072	0.14	0.93367
Mbd2	0.000412997	-0.182374	0.091	0.168	0.937916
Birc6	0.000413901	-0.296936	0.094	0.171	0.939969
U2surp	0.000416617	-0.3078	0.118	0.203	0.946137
Atxn7l3	0.000417484	-0.261315	0.123	0.213	0.948107
Rpl22l1	0.000418277	-0.0562032	0.043	0.098	0.949906
Usp1	0.000421445	-0.138977	0.106	0.189	0.957102
Ptpra	0.00042384	-0.223391	0.165	0.269	0.96254
Cd53	0.000425073	-0.184369	0.167	0.273	0.965342
Srsf5	0.000429531	-0.134582	0.195	0.311	0.975466
Rasal1	0.000429585	-0.189845	0.091	0.168	0.975587
Mga	0.000435322	-0.160104	0.096	0.175	0.988615
Rps6ka1	0.000437481	-0.0359853	0.133	0.231	0.993519
Sema4d	0.000441497	-0.185617	0.084	0.157	1
Actr3b	0.000447214	0.018055	0.129	0.224	1
Gnaq	0.000447311	-0.173075	0.055	0.115	1
Ddx24	0.000450158	-0.388229	0.081	0.15	1
Tifab	0.00046736	-0.219096	0.122	0.21	1
Lrp1b	0.000469903	-0.0512144	0.207	0.329	1
Ifnar1	0.000474469	-0.381259	0.051	0.108	1
Sft2d2	0.000479656	-0.192366	0.109	0.192	1
Trpm7	0.00048379	-0.221658	0.066	0.129	1
Nsl1	0.000484422	-0.1695	0.099	0.178	1
Idh3b	0.000485449	0.0428176	0.128	0.224	1
Vdac2	0.00048612	-0.0589671	0.11	0.196	1
Apoh	0.000493879	-0.140983	0.172	0.28	1
Zfp292	0.000497305	0.0116074	0.11	0.196	1
Kdm5b	0.000504803	-0.136578	0.044	0.098	1
H3f3a	0.000507221	-0.0617345	0.185	0.29	1
Jak1	0.000511639	-0.0545522	0.172	0.287	1
Slc2a5	0.000514453	-0.158443	0.264	0.406	1
Zfp91	0.000517823	-0.237154	0.105	0.185	1
Brd8	0.000518772	-0.228609	0.054	0.112	1
Rbm25	0.00052347	-0.130098	0.183	0.294	1
Ddx5	0.000529979	-0.206483	0.479	0.654	1
Akna	0.000536979	-0.200543	0.063	0.126	1
Vav1	0.000537235	-0.105853	0.211	0.332	1
Ppp1r12a	0.000542245	-0.241508	0.185	0.294	1
Gsdmd	0.000543975	-0.0617172	0.069	0.136	1
Tnpo1	0.000550053	-0.204066	0.276	0.413	1
Rap2a	0.00055214	-0.218969	0.077	0.147	1
Lpp	0.00055546	-0.228178	0.129	0.22	1
Rnpep	0.000560858	-0.174042	0.061	0.122	1
Samm50	0.000563916	-0.0577179	0.044	0.098	1
Zfp90	0.000564891	-0.124699	0.107	0.189	1
Hpgds	0.000565357	-0.150125	0.374	0.538	1
Cth	0.000565871	-0.110082	0.164	0.269	1
Cyfip1	0.000567678	-0.212818	0.375	0.528	1
Adam10	0.000568455	-0.0323928	0.181	0.294	1
Cul1	0.000571053	0.00113937	0.114	0.203	1
Ramp2	0.000571402	-0.334687	0.183	0.287	1
Epn2	0.000571875	-0.284089	0.052	0.108	1
Rps27a	0.000575605	-0.192027	0.275	0.395	1
Xbp1	0.000576483	-0.0185554	0.122	0.213	1
Rpl30	0.000577248	0.0338414	0.242	0.357	1
Itga6	0.000587892	-0.354798	0.187	0.294	1
St3gal6	0.000597469	0.0804634	0.2	0.329	1
Cant1	0.000597815	-0.0639756	0.129	0.22	1
Purg	0.000598051	-0.0474641	0.118	0.206	1
Clec2g	0.000615128	0.011322	0.167	0.276	1
Rpl10a	0.000618778	-0.0363008	0.137	0.231	1
Taok3	0.000621278	-0.133909	0.068	0.133	1
Zc3h11a	0.000643821	-0.27466	0.191	0.294	1
Ybx1	0.000656712	0.0274523	0.171	0.28	1
Rgs5	0.00066893	-0.0341521	0.198	0.315	1
Nr2c2	0.000676798	-0.156365	0.05	0.105	1
Ifi27	0.000678498	-0.242608	0.076	0.143	1
Supt16	0.000679546	-0.176287	0.045	0.098	1
Rap1a	0.000684594	-0.19949	0.096	0.171	1
Mapre1	0.000687921	-0.042065	0.111	0.196	1
P2rx7	0.00069611	-0.00386227	0.056	0.115	1
Ube3b	0.000697193	-0.00907828	0.167	0.273	1
Snrnp70	0.000697971	-0.199654	0.294	0.434	1
Eno4	0.000698753	-0.475244	0.07	0.133	1
Morf4l1	0.000707614	-0.169495	0.254	0.367	1
Pygb	0.000728631	-0.0575828	0.248	0.378	1
Rnase6	0.000733231	-0.0785168	0.125	0.213	1
Rtcb	0.000735365	-0.343456	0.055	0.112	1
Ccar1	0.000738559	0.0497841	0.084	0.157	1
Prpf40a	0.000745303	-0.218312	0.089	0.161	1
Kif5b	0.000748621	-0.0278571	0.109	0.192	1
Anp32e	0.00075296	-0.0409907	0.125	0.213	1
Btk	0.000759907	-0.130656	0.052	0.108	1
Slc16a6	0.00076376	-0.144202	0.146	0.241	1
Kdm3a	0.000765858	-0.335377	0.058	0.115	1
Atp1b3	0.000779671	-0.200057	0.114	0.196	1
Safb2	0.000787461	-0.139143	0.199	0.311	1
Spast	0.000789091	-0.0137217	0.045	0.098	1
Klk8	0.000792354	-0.165905	0.059	0.119	1
Hmgn1	0.000798986	0.0210706	0.261	0.385	1
Dnajc5	0.000805619	0.00322016	0.1	0.178	1
Rapgef6	0.000810875	-0.273504	0.074	0.14	1
mt-Nd5	0.000818363	-0.187484	0.227	0.346	1
Fkbp15	0.000820628	-0.193651	0.084	0.154	1
Cd86	0.000828156	-0.130294	0.096	0.171	1
Tmx3	0.000843904	-0.0552731	0.054	0.112	1
Rbp4	0.000853184	-0.0937573	0.33	0.479	1
Smad7	0.000875351	0.011895	0.085	0.157	1
Emc7	0.000877654	-0.18822	0.046	0.098	1
Wac	0.000877803	-0.311737	0.08	0.147	1
Hspa9	0.000878618	-0.264929	0.082	0.15	1
Slc39a7	0.000884876	-0.323177	0.114	0.192	1
Gxylt1	0.000885169	-0.190694	0.06	0.119	1
Herpud1	0.000893914	-0.163614	0.125	0.213	1
Hsd17b12	0.000898766	-0.0746399	0.046	0.098	1
Osbpl11	0.000899994	-0.096447	0.092	0.164	1
Otulinl	0.000902382	-0.162111	0.27	0.402	1
Cd47	0.000903836	-0.223479	0.114	0.196	1
Pttg1ip	0.000909043	-0.0860182	0.078	0.147	1
Ifngr2	0.000909504	-0.297087	0.075	0.14	1
Cat	0.000918902	-0.326248	0.042	0.091	1
Ecel1	0.000919135	-0.225308	0.131	0.217	1
G3bp2	0.00092119	-0.334811	0.104	0.178	1
Pik3cb	0.000929302	-0.127715	0.127	0.213	1
Smc1a	0.000933229	-0.0429999	0.091	0.164	1
Myh9	0.000943958	-0.117848	0.243	0.367	1
Dnajc7	0.000944309	-0.136006	0.139	0.231	1
Ddrgk1	0.00094852	-0.130383	0.084	0.154	1
Pir	0.000952197	-0.00197748	0.133	0.224	1
Sfpq	0.000954121	-0.068495	0.249	0.381	1
Per1	0.000957016	-0.0769608	0.26	0.392	1
Lair1	0.000957092	-0.162452	0.244	0.367	1
Cttnbp2	0.000959897	-0.0339301	0.199	0.308	1
Sqstm1	0.000962242	-0.201049	0.164	0.262	1
Rhag	0.000969857	-0.174011	0.1	0.175	1
Cxxc5	0.000980067	-0.257241	0.114	0.192	1
Kmt2b	0.000992127	-0.0495094	0.245	0.378	1
Ccnyl1	0.00100951	-0.152406	0.402	0.566	1
C3ar1	0.00102012	0.0515035	0.122	0.21	1
Itch	0.00102382	-0.219141	0.056	0.112	1
Fchsd2	0.00103847	-0.105247	0.072	0.136	1
Ociad1	0.00104659	-0.0629077	0.126	0.213	1
Eif3b	0.00105276	-0.0944945	0.217	0.332	1
Txnl1	0.00105291	-0.184326	0.11	0.189	1
Rpl10a-ps1	0.00106516	-0.049812	0.127	0.213	1
Rasa4	0.00108088	-0.266577	0.073	0.136	1
Amigo2	0.00109449	-0.0546258	0.092	0.164	1
Phyhd1	0.00109953	-0.20115	0.148	0.238	1
Stx4a	0.00110692	-0.335382	0.109	0.185	1
Zfp263	0.00110821	0.117938	0.059	0.119	1
Lao1	0.0011106	-0.138112	0.106	0.182	1
Ankhd1	0.00112676	-0.253173	0.086	0.154	1
Sec62	0.00113188	0.0363691	0.118	0.203	1
Ncor1	0.00113205	-0.173789	0.139	0.227	1
Galnt2	0.00113418	-0.117231	0.058	0.115	1
Tpt1-ps3	0.00113479	0.723086	0.129	0.063	1
Irf8	0.0011541	-0.0263387	0.267	0.406	1
Actr1a	0.00115497	-0.158782	0.051	0.105	1
Sun2	0.0011556	-0.0591858	0.163	0.266	1
Tmed7	0.00116024	-0.187338	0.054	0.108	1
Rpl10	0.00117682	-0.170808	0.357	0.479	1
Cpeb3	0.00118779	0.0565161	0.135	0.227	1
Lcorl	0.00119727	-0.199087	0.069	0.129	1
Brpf1	0.00120432	-0.0183347	0.077	0.143	1
Celf1	0.00121692	-0.228456	0.234	0.346	1
App	0.00122348	-0.0678616	0.12	0.203	1
Nek6	0.00122378	0.0261134	0.058	0.115	1
Adap2	0.00124747	-0.0183723	0.185	0.294	1
Aaas	0.0012505	-0.105487	0.054	0.108	1
Tmem30a	0.00130666	-0.0762128	0.118	0.199	1
Baz1a	0.00130827	-0.204686	0.092	0.161	1
Ankrd44	0.00130971	-0.0539033	0.056	0.112	1
Rplp2	0.00131019	-0.175622	0.144	0.234	1
Rsrc2	0.00131972	-0.177382	0.162	0.259	1
Arhgap12	0.00133768	-0.0112571	0.124	0.21	1
Arhgap17	0.0013424	-0.0890662	0.101	0.175	1
Yes1	0.00134476	-0.130172	0.145	0.234	1
Efl1	0.00135351	-0.14471	0.267	0.388	1
Fam111a	0.00136019	-0.12906	0.066	0.126	1
Kdm3b	0.00137251	-0.207858	0.045	0.094	1
Limd2	0.00137824	-0.158659	0.108	0.185	1
Sgtb	0.00138044	-0.0904734	0.261	0.388	1
Sptbn2	0.0013827	-0.217005	0.066	0.126	1
Wdfy3	0.00138674	-0.213807	0.05	0.101	1
Hectd1	0.00139378	-0.27004	0.101	0.175	1
Serbp1	0.00139629	-0.0491826	0.329	0.486	1
Gcnt1	0.00139657	-0.289698	0.11	0.185	1
Pmp22	0.00140098	-0.120881	0.124	0.206	1
Wbp11	0.00140164	-0.113656	0.043	0.091	1
Baz2b	0.00140367	-0.302763	0.095	0.164	1
Rac1	0.00140381	0.0228958	0.191	0.301	1
Akirin2	0.00144298	0.0895498	0.063	0.122	1
Gtf2h2	0.00144948	-0.0291142	0.113	0.192	1
Atp5l	0.0014838	0.0397343	0.136	0.227	1
Riok3	0.00149465	-0.315826	0.062	0.119	1
Rpl37a	0.00151472	-0.155988	0.077	0.14	1
Asf1b	0.0015237	-0.250577	0.086	0.154	1
Aspg	0.00153811	-0.259163	0.136	0.22	1
Bach1	0.00154699	-0.123041	0.104	0.178	1
Lonp1	0.00156848	-0.24332	0.058	0.112	1
Arl1	0.00157261	-0.180279	0.074	0.136	1
Csf3r	0.00157553	-0.368176	0.081	0.143	1
Ecpas	0.00158481	-0.129374	0.081	0.147	1
Irak1	0.00161325	-0.117486	0.069	0.129	1
Rps6kb1	0.00161372	-0.271307	0.048	0.098	1
Ube2o	0.00162087	0.0428613	0.195	0.308	1
Ooep	0.00162396	-0.0520709	0.057	0.112	1
Ccr5	0.00167285	-0.23971	0.212	0.318	1
Chmp3	0.0016754	-0.233305	0.055	0.108	1
Derl1	0.00168449	-0.0633421	0.207	0.318	1
Sdf4	0.00168617	0.135267	0.125	0.21	1
Srsf11	0.0016921	-0.106846	0.182	0.283	1
Atp5f1	0.00169609	-0.0416742	0.084	0.15	1
Eif4b	0.00170076	-0.239168	0.098	0.168	1
Uqcrc2	0.00171681	-0.181028	0.048	0.098	1
Srsf9	0.00172125	-0.220806	0.058	0.112	1
Chd7	0.00172327	-0.0352632	0.157	0.252	1
Invs	0.00176346	-0.205335	0.051	0.101	1
Pdia3	0.00176684	-0.0621005	0.316	0.455	1
Rpl7l1	0.00177182	-0.0398013	0.054	0.108	1
Mtmr3	0.00183703	-0.0484717	0.039	0.084	1
Trpc4ap	0.00183831	0.0544051	0.057	0.112	1
Bmpr2	0.0018398	-0.211466	0.075	0.136	1
St13	0.00184082	-0.199736	0.134	0.217	1
Morc3	0.00184783	-0.0775521	0.133	0.217	1
Kdm5a	0.00185378	-0.244857	0.078	0.14	1
Ppme1	0.00185704	-0.225178	0.204	0.311	1
Dlg2	0.00185719	-0.0302594	0.199	0.308	1
Ppp2ca	0.00188464	-0.218509	0.105	0.178	1
Dmtf1	0.00188779	-0.12972	0.084	0.15	1
Acss1	0.00189438	-0.0912843	0.239	0.357	1
Usp25	0.0018961	-0.245183	0.037	0.08	1
Tnpo3	0.00189653	-0.104287	0.384	0.535	1
Fmnl3	0.00192554	0.037348	0.144	0.238	1
Setd5	0.00194027	-0.21123	0.068	0.126	1
Zzef1	0.00195297	-0.339654	0.044	0.091	1
Noc2l	0.0019719	-0.307025	0.064	0.119	1
Tomm34	0.00197222	-0.205512	0.054	0.105	1
Fyco1	0.00197775	-0.0657683	0.164	0.259	1
Rinl	0.00198296	0.0521699	0.088	0.157	1
M6pr	0.00199689	-0.017444	0.134	0.22	1
Rpl21	0.00200504	-0.20611	0.323	0.434	1
Rnase11	0.00203186	-0.0378581	0.051	0.101	1
Plxdc2	0.00203429	-0.13363	0.462	0.629	1
Safb	0.00207433	-0.145325	0.136	0.217	1
Sh3bgrl3	0.00207842	-0.0102811	0.095	0.164	1
Tfr2	0.00208158	-0.250771	0.193	0.294	1
Appl2	0.00209819	-0.11169	0.111	0.185	1
Gpbp1	0.00210934	-0.129038	0.076	0.136	1
Ano1	0.00211697	0.00320597	0.245	0.374	1
Pabpc1	0.00212286	-0.0124702	0.335	0.483	1
Mid1ip1	0.00213963	0.0233569	0.046	0.094	1
Vcp	0.00214245	-0.224804	0.193	0.29	1
Ylpm1	0.00214495	-0.180911	0.056	0.108	1
Entpd1	0.0021575	-0.0869213	0.31	0.451	1
Psmb10	0.00217675	-0.16338	0.093	0.161	1
Zfp710	0.00221545	-0.336971	0.086	0.15	1
Smc6	0.00222193	-0.195528	0.073	0.133	1
Nlgn2	0.00222859	-0.334167	0.053	0.101	1
Tmed3	0.00224582	-0.222071	0.124	0.203	1
Rab1a	0.0022503	-0.133007	0.088	0.154	1
Parg	0.00227936	-0.249602	0.051	0.101	1
Txlna	0.00230024	-0.239131	0.064	0.119	1
Cdk9	0.00232117	-0.0618384	0.081	0.143	1
Mog	0.00232321	-0.0944008	0.204	0.308	1
Evi2a	0.00233416	-0.0290945	0.133	0.217	1
Knop1	0.00233834	-0.129315	0.152	0.238	1
Vps37b	0.00234065	-0.103317	0.056	0.108	1
Eif3a	0.00234798	0.0551468	0.193	0.297	1
Acsm4	0.00235663	-0.100353	0.106	0.178	1
Zbtb7a	0.00235731	-0.178865	0.112	0.185	1
Prkcg	0.00237465	-0.105728	0.073	0.133	1
Ppp1r15a	0.00238675	-0.0366825	0.26	0.385	1
Srgap2	0.00239173	-0.100485	0.342	0.479	1
Csta1	0.00242755	-0.100691	0.078	0.14	1
Arid4a	0.00246591	-0.204927	0.156	0.241	1
Glmp	0.00246728	-0.160249	0.084	0.147	1
Net1	0.00247177	-0.188428	0.089	0.154	1
Vamp8	0.00248285	-0.154159	0.101	0.171	1
Anp32a	0.00248693	-0.244598	0.077	0.136	1
Gp2	0.00249566	-0.243392	0.129	0.206	1
Stk38	0.00251234	-0.278374	0.052	0.101	1
Atp2b1	0.0025139	-0.0128827	0.176	0.273	1
Adgra3	0.00253839	-0.167178	0.069	0.126	1
Gramd1a	0.00256042	-0.303075	0.065	0.119	1
Cnmd	0.00257874	-0.0480196	0.049	0.098	1
Pcna	0.00259355	-0.0954225	0.081	0.143	1
Spop	0.00261456	-0.119852	0.066	0.122	1
Mark3	0.0026178	-0.29125	0.065	0.119	1
Ap3m1	0.00263078	-0.0374326	0.09	0.157	1
Lipa	0.0026551	0.0112669	0.076	0.136	1
Rfc1	0.00265533	-0.218832	0.045	0.091	1
Olfm3	0.00266101	-0.111492	0.354	0.5	1
Cald1	0.00268552	0.0211952	0.152	0.241	1
Ywhae	0.002695	-0.0696162	0.27	0.392	1
Prpsap2	0.00270466	-0.109023	0.057	0.108	1
Rnaset2b	0.00270911	-0.247844	0.308	0.413	1
Rpl32	0.00271683	0.0203566	0.122	0.199	1
Pura	0.00275465	-0.17825	0.084	0.147	1
Actn4	0.00276146	-0.300571	0.06	0.112	1
Wdr33	0.00276213	-0.116352	0.047	0.094	1
Papola	0.00276262	-0.208965	0.087	0.15	1
Cct6a	0.00277929	-0.325414	0.068	0.122	1
Npc2	0.00282762	-0.0663692	0.287	0.416	1
Mbnl2	0.00283681	-0.0325985	0.224	0.339	1
Ccz1	0.00285715	0.118598	0.047	0.094	1
Cecr2	0.00293008	-0.0658404	0.04	0.084	1
Akap9	0.002935	-0.107924	0.141	0.224	1
Tm6sf1	0.00293506	-0.126891	0.107	0.178	1
Hspa8	0.00294166	0.533628	0.698	0.678	1
Gna13	0.00295494	0.082588	0.1	0.171	1
Arpc1b	0.00296918	-0.0203395	0.183	0.283	1
Rgma	0.00299625	-0.116774	0.22	0.329	1
Mknk1	0.00301523	-0.00160193	0.059	0.112	1
Pxn	0.00303179	-0.0312618	0.066	0.122	1
Tent5c	0.00306785	-0.172496	0.095	0.161	1
Rhoh	0.00309295	-0.234155	0.086	0.147	1
Spns1	0.00311055	0.00578613	0.264	0.395	1
Atxn10	0.00311114	-0.101162	0.065	0.119	1
Usb1	0.0031513	0.0282976	0.206	0.315	1
Cab39	0.00317216	-0.136184	0.092	0.157	1
Syde2	0.00318717	-0.120865	0.08	0.14	1
Gpr34	0.00320694	-0.160663	0.262	0.378	1
Lacc1	0.00320883	0.0708989	0.052	0.101	1
Gkn3	0.00322317	0.103894	0.081	0.143	1
Pfkfb3	0.00325913	0.0251175	0.054	0.105	1
Renbp	0.00329288	-0.0550937	0.092	0.157	1
Ube2i	0.00336683	-0.137386	0.07	0.126	1
Myo6	0.00341107	-0.0466827	0.191	0.283	1
Marcks	0.00342931	-0.175362	0.498	0.636	1
Rnf149	0.00343881	-0.191025	0.051	0.098	1
Phip	0.00343932	-0.11563	0.139	0.217	1
Chd8	0.00344839	0.0124205	0.095	0.161	1
Cmklr1	0.00345885	-0.0030873	0.099	0.168	1
Bcap31	0.00346164	-0.374051	0.066	0.119	1
Mmd	0.00347134	-0.061538	0.065	0.119	1
Acvrl1	0.00348244	-0.137479	0.051	0.098	1
Khdrbs1	0.00348503	-0.0929042	0.073	0.129	1
Kat6a	0.0035187	0.0101951	0.125	0.203	1
Glyat	0.00352221	-0.119964	0.075	0.133	1
Acox3	0.00353069	-0.0855252	0.06	0.112	1
Pcbp2	0.00353654	-0.105997	0.085	0.147	1
Capza2	0.00354387	-0.013634	0.28	0.409	1
Aldoa	0.00357132	-0.191951	0.096	0.161	1
Snrpn	0.00365266	-0.0689851	0.088	0.15	1
Zmynd8	0.00368138	-0.165627	0.07	0.126	1
Gpi1	0.00373148	-0.0619411	0.073	0.129	1
Fndc3a	0.00374693	-0.177064	0.063	0.115	1
Rbp7	0.00377236	-0.0793506	0.369	0.49	1
Psmg1	0.0037742	-0.105238	0.268	0.388	1
Ppp4r3b	0.00378751	-0.364362	0.067	0.119	1
Rps3a1	0.00380279	-0.130745	0.27	0.378	1
Brsk1	0.00381132	-0.167945	0.081	0.14	1
Smad3	0.00382067	-0.243119	0.051	0.098	1
Hexim1	0.00384185	0.768983	0.32	0.269	1
Hnrnpa0	0.00386997	-0.0214941	0.069	0.126	1
Naa35	0.00387826	0.129352	0.11	0.185	1
Ss18	0.00392625	-0.251494	0.044	0.087	1
Fbll1	0.00393804	0.0957097	0.101	0.171	1
Pcf11	0.00399146	-0.0187195	0.167	0.259	1
Arl4d	0.00400519	0.81707	0.084	0.035	1
Ism1	0.00401416	-0.0428423	0.091	0.154	1
Acadsb	0.0040158	0.0567757	0.118	0.192	1
Vdac3	0.00406061	-0.00367612	0.043	0.087	1
Ddi2	0.00408029	-0.167763	0.061	0.112	1
Arfgef1	0.0040951	-0.050801	0.058	0.108	1
Asah1	0.00410068	-0.0193915	0.11	0.182	1
Ssh2	0.00410118	-0.0740742	0.295	0.42	1
Edn1	0.00411381	-0.143212	0.099	0.164	1
Fcgrt	0.00414011	-0.163568	0.079	0.136	1
Atp8a1	0.00414033	0.0376035	0.125	0.203	1
Diaph2	0.00414308	-0.0982293	0.091	0.154	1
Dapp1	0.00415658	0.0825005	0.115	0.189	1
Fbrs	0.00416001	-0.122482	0.131	0.206	1
Wdr37	0.00416855	-0.122333	0.054	0.101	1
Selenof	0.00417979	-0.0443327	0.077	0.136	1
Ntpcr	0.00418429	-0.213033	0.077	0.133	1
Atp6v1c1	0.00418795	-0.124913	0.061	0.112	1
Alyref2	0.00423245	-0.102474	0.051	0.098	1
Eed	0.00423797	-0.180871	0.08	0.136	1
Sco2	0.00424258	-0.303424	0.054	0.101	1
Arid4b	0.0042879	0.123579	0.084	0.147	1
Ankrd12	0.00429162	-0.151398	0.047	0.091	1
Sec24b	0.00430164	-0.154901	0.047	0.091	1
Dnajc1	0.00430396	-0.134419	0.049	0.094	1
Nosip	0.00431383	-0.00529773	0.219	0.329	1
Tagap	0.00431441	-0.00433422	0.107	0.175	1
Havcr2	0.00435903	0.0633005	0.167	0.259	1
Sec63	0.00436355	-0.0363775	0.056	0.105	1
Maml3	0.00438671	-0.220581	0.059	0.108	1
Mon1a	0.00441208	0.00315371	0.15	0.234	1
Pdzd8	0.00442284	-0.3951	0.058	0.105	1
Rtn3	0.00444508	-0.0272008	0.11	0.178	1
Lpcat3	0.00444825	-0.102362	0.088	0.15	1
Ap3d1	0.00444873	0.0949098	0.115	0.189	1
Ecscr	0.00445035	-0.128012	0.118	0.189	1
Casp8	0.00446075	0.0265888	0.07	0.126	1
Hnrnpf	0.00448035	-0.183426	0.123	0.192	1
Ik	0.00451648	-0.15616	0.207	0.308	1
Hnrnpl	0.00453228	0.0394608	0.181	0.276	1
Plcg2	0.00454026	-0.236689	0.299	0.423	1
Plcb1	0.00454242	0.0560539	0.217	0.329	1
Ehd4	0.0045686	-0.103562	0.141	0.22	1
Plekhb1	0.00461848	-0.163121	0.22	0.322	1
Mef2a	0.00462771	-0.146084	0.34	0.476	1
Urb2	0.00464953	-0.0962799	0.084	0.143	1
Rnf169	0.00464991	-0.00931798	0.049	0.094	1
Rsf1	0.00468476	-0.0336374	0.234	0.343	1
Spint1	0.00468928	0.0343413	0.051	0.098	1
Adssl1	0.00469042	-0.138088	0.08	0.136	1
Rnase10	0.00469611	-0.16419	0.094	0.157	1
Kdm7a	0.00470681	-0.0720797	0.107	0.175	1
Dnmt3a	0.00472217	-0.0298173	0.113	0.182	1
Rad21	0.00472363	-0.0324617	0.044	0.087	1
Rabac1	0.00473336	-0.103414	0.125	0.199	1
Atf6	0.00473392	0.00707483	0.091	0.154	1
Zfhx3	0.00473669	0.0536499	0.267	0.395	1
Mgat4a	0.00479003	-0.147287	0.143	0.22	1
Ppp1r9b	0.00481207	-0.0474513	0.071	0.126	1
Plcb3	0.00482897	-0.0600301	0.126	0.199	1
Zyg11b	0.00483148	-0.0892767	0.062	0.112	1
Rps11	0.0048927	-0.0689181	0.322	0.434	1
Rasal3	0.00491811	-0.0430162	0.186	0.28	1
Oga	0.00491963	-0.10231	0.118	0.189	1
Tmco1	0.00497229	-0.110185	0.074	0.129	1
Inpp4b	0.00497652	-0.266641	0.062	0.112	1
Tyrobp	0.00497715	-0.0292692	0.259	0.374	1
1700017B05Rik	0.00497728	-0.154964	0.114	0.182	1
Rbm26	0.00498431	-0.120128	0.092	0.154	1
2007-09-01	0.00500026	-0.106482	0.102	0.168	1
Cd34	0.00503856	-0.139842	0.057	0.105	1
Nckap1l	0.00504073	0.00604734	0.183	0.276	1
Atp2a2	0.0050475	0.0158258	0.066	0.119	1
Rnf20	0.00505011	0.0695184	0.056	0.105	1
Nol7	0.00505241	0.0766521	0.047	0.091	1
Slc29a3	0.00506069	-0.119187	0.257	0.364	1
Spty2d1	0.00515551	-0.0784467	0.103	0.168	1
Skap2	0.00517176	-0.0907433	0.09	0.15	1
Jmjd1c	0.00518437	-0.0700099	0.258	0.374	1
Ifnlr1	0.00520117	0.0360888	0.277	0.402	1
Scoc	0.00522408	-0.141062	0.223	0.322	1
Zfp992	0.00526805	-0.0392671	0.052	0.098	1
Ppcdc	0.00530961	-0.0595325	0.087	0.147	1
Bptf	0.00537989	0.0601967	0.167	0.255	1
Snx17	0.00540786	0.00508082	0.087	0.147	1
Tars	0.00540957	-0.255558	0.084	0.14	1
Itgam	0.00548011	-0.0933181	0.543	0.703	1
Tnks2	0.00553796	-0.127886	0.197	0.29	1
Tpp1	0.00553903	-0.193908	0.138	0.213	1
Tcirg1	0.00556093	-0.048496	0.141	0.22	1
Ppib	0.00557179	-0.185795	0.167	0.248	1
Arhgef40	0.00558115	-0.153489	0.083	0.14	1
Itsn1	0.005598	-0.111088	0.219	0.315	1
Tenm3	0.00559972	-0.0923306	0.155	0.234	1
Capzb	0.00564081	0.103403	0.174	0.269	1
P2ry6	0.00564288	-0.05661	0.057	0.105	1
Anapc5	0.00566365	-0.08607	0.05	0.094	1
Lsm4	0.00570001	0.0305585	0.062	0.112	1
Cabin1	0.00570134	-0.0101309	0.05	0.094	1
Scn11a	0.0057122	-0.0614793	0.04	0.08	1
Ddost	0.00586711	0.0163705	0.097	0.161	1
Sp6	0.00587932	-0.0528774	0.136	0.213	1
Agmo	0.00588313	-0.187264	0.147	0.224	1
Kmt5b	0.00590549	-0.16606	0.062	0.112	1
Stx7	0.00593735	0.0191989	0.115	0.185	1
Rhobtb1	0.00605184	-0.196809	0.084	0.14	1
Tlr7	0.00607063	0.170326	0.086	0.147	1
Kmt2c	0.00607216	-0.229334	0.124	0.192	1
Vapa	0.00608519	0.0805242	0.054	0.101	1
Peak1	0.0060852	0.153813	0.094	0.157	1
Ppp1cb	0.00613555	-0.151219	0.046	0.087	1
B4galnt1	0.00624547	-0.0258703	0.099	0.161	1
Tpst1	0.00631766	-0.0929096	0.476	0.598	1
Grasp	0.00636653	-0.214264	0.061	0.108	1
Ndufb3	0.00646772	-0.176456	0.051	0.094	1
Tmed9	0.00649562	0.0096172	0.11	0.178	1
Gspt1	0.0065927	0.0703872	0.107	0.175	1
Ppp2r5a	0.0066519	-0.112517	0.071	0.122	1
Filip1l	0.00670172	0.0614158	0.095	0.157	1
Gna12	0.00676544	-0.275462	0.096	0.154	1
Naca	0.00677057	0.121244	0.125	0.199	1
Chmp4b	0.00677458	-0.196296	0.078	0.133	1
Sel1l	0.00680719	-0.0293397	0.36	0.507	1
Myl12a	0.00688826	-0.0281911	0.053	0.098	1
Kctd12b	0.00691764	-0.0658274	0.362	0.5	1
Cul3	0.00694271	0.247407	0.084	0.143	1
Pla2g4b	0.00695965	-0.131219	0.058	0.105	1
Pbxip1	0.00697335	-0.025727	0.144	0.22	1
Folh1	0.00697634	-0.042493	0.051	0.094	1
Nolc1	0.0069945	-0.222057	0.09	0.147	1
Ccdc47	0.00700816	0.0656291	0.081	0.136	1
Stk10	0.00702179	-0.180273	0.095	0.154	1
Zranb1	0.00708372	-0.0629666	0.046	0.087	1
Smap1	0.00709124	-0.104381	0.061	0.108	1
Zfp706	0.00711602	0.00213109	0.088	0.147	1
P2ry12	0.00713181	-0.162561	0.676	0.797	1
Rdx	0.00716574	-0.0190137	0.111	0.178	1
Tbl1xr1	0.00725402	-0.00854151	0.066	0.115	1
Ankle2	0.00733141	-0.210376	0.14	0.213	1
Crp	0.00740501	-0.220063	0.099	0.157	1
Dhrs3	0.00741535	-0.0178291	0.091	0.15	1
Espl1	0.00743868	-0.101752	0.056	0.101	1
Tent4b	0.00746679	-0.083436	0.048	0.091	1
Trf	0.00750277	-0.0692599	0.53	0.65	1
Nfe2l2	0.00751144	-0.156181	0.125	0.192	1
Ttc7b	0.007517	-0.333317	0.047	0.087	1
Hjurp	0.0075803	-0.23152	0.067	0.115	1
Astn1	0.00761889	0.0205616	0.117	0.185	1
Man1a	0.00762823	0.135675	0.103	0.168	1
Aebp2	0.00763764	-0.252966	0.062	0.108	1
Lyar	0.00765883	-0.0378215	0.071	0.122	1
Mia2	0.00771618	-0.00502219	0.112	0.178	1
Slc4a7	0.00775847	0.0457011	0.061	0.108	1
Dennd1c	0.00775877	-0.143112	0.054	0.098	1
Gga1	0.00780291	0.0364394	0.084	0.14	1
Slc9a9	0.00781319	-0.0536041	0.097	0.157	1
Pja2	0.00781422	-0.255375	0.047	0.087	1
Tmem131	0.00782213	0.0351257	0.078	0.133	1
Numbl	0.00787962	0.0428918	0.068	0.119	1
Frmd4a	0.00792649	-0.192792	0.269	0.378	1
P2ry13	0.00793773	-0.140675	0.322	0.444	1
Usp12	0.00795706	0.0310141	0.066	0.115	1
Lyst	0.00806721	-0.0575188	0.058	0.105	1
Slc38a6	0.00825404	-0.216619	0.054	0.098	1
Csf2rb	0.00826056	-0.0673229	0.049	0.091	1
Washc2	0.00829567	-0.251217	0.106	0.168	1
Cap2	0.00834807	-0.187559	0.083	0.136	1
Pald1	0.00835414	-0.037441	0.153	0.231	1
Samd1	0.0083853	-0.0168516	0.095	0.154	1
Chd1	0.00840336	0.216845	0.11	0.178	1
Cpne1	0.00847608	-0.0321172	0.255	0.36	1
Suz12	0.00850031	-0.018812	0.051	0.094	1
Mapk8ip3	0.00851176	-0.245131	0.039	0.077	1
Caprin1	0.00855446	-0.222667	0.07	0.119	1
Irf5	0.00855786	0.0503934	0.096	0.157	1
Pomt1	0.00857202	-0.113391	0.432	0.584	1
Akr1a1	0.00859391	-0.0854307	0.144	0.217	1
Cdk19	0.008628	-0.135085	0.044	0.084	1
Phactr2	0.00864553	-0.318698	0.05	0.091	1
Tspan14	0.00866518	0.260371	0.102	0.168	1
Bap1	0.00868197	0.0437165	0.235	0.343	1
Tnfrsf1b	0.00873119	-0.0650578	0.084	0.14	1
Ptbp1	0.00877357	0.0591721	0.279	0.406	1
Clec3b	0.00880575	-0.00503962	0.063	0.112	1
Stab2	0.00887343	-0.110817	0.088	0.143	1
Mrps15	0.00891955	-0.123501	0.057	0.101	1
Rpl17	0.00901346	-0.129559	0.41	0.49	1
Lap3	0.00901877	-0.0723106	0.064	0.112	1
Trim8	0.00916621	0.0708225	0.071	0.122	1
Cd84	0.0091846	0.0789407	0.099	0.161	1
Zfp120	0.00926153	0.00261707	0.049	0.091	1
Adipor1	0.00929855	-0.0918583	0.077	0.129	1
Cnbd2	0.00931635	0.138079	0.084	0.14	1
Luc7l3	0.00933008	-0.0150185	0.09	0.147	1
Myl9	0.00937708	-0.103778	0.054	0.098	1
Dnajb4	0.00939728	0.0639963	0.107	0.171	1
Lpcat1	0.00939966	-0.188593	0.11	0.171	1
Lrba	0.00942482	0.0631367	0.084	0.14	1
Spsb3	0.00945466	0.116841	0.12	0.189	1
Hnrnpu	0.00946844	-0.18113	0.424	0.549	1
Cldn3	0.00951472	0.236558	0.09	0.15	1
Rpl12	0.00956142	-0.0616431	0.414	0.514	1
Zfp652	0.00974701	-0.0876739	0.093	0.15	1
Sars	0.00977401	-0.106723	0.05	0.091	1
Pnpla7	0.00977922	-0.252409	0.087	0.14	1
Ltc4s	0.00981469	0.025311	0.081	0.136	1
Wdr1	0.00981553	0.00993263	0.072	0.122	1
Irf2bp2	0.00991098	-0.0612865	0.057	0.101	1
Rer1	0.00993771	-0.163193	0.119	0.182	1
Prkar1a	0.0099567	-0.0181699	0.106	0.168	1
Nus1	0.00997356	0.199375	0.104	0.168	1
Kcnk6	0.0100253	0.0309805	0.148	0.224	1
Rab4b	0.0100456	-0.082368	0.346	0.472	1
Mlph	0.0100782	-0.000863933	0.085	0.14	1
Naa50	0.0102567	-0.0182635	0.05	0.091	1
Pdcd4	0.0102811	0.30798	0.051	0.094	1
Mia3	0.0103354	-0.0622365	0.125	0.192	1
Slc37a2	0.0104403	-0.238568	0.061	0.105	1
Pcnt	0.0104843	-0.0706721	0.043	0.08	1
Pef1	0.0104964	0.0270553	0.101	0.161	1
Ptafr	0.0107991	0.196346	0.107	0.171	1
Klf3	0.0108186	-0.0104602	0.073	0.122	1
Slf2	0.0108724	-0.059404	0.196	0.283	1
Map3k2	0.0109141	0.103455	0.054	0.098	1
Rab2a	0.0109225	0.0321829	0.101	0.161	1
Smarcc1	0.0110016	-0.220657	0.063	0.108	1
Saa3	0.0110706	0.130577	0.219	0.322	1
Atp6v0a2	0.0111106	-0.143677	0.116	0.178	1
Arhgef2	0.0111276	-0.0624424	0.112	0.175	1
Clk4	0.0111583	-0.0923368	0.06	0.105	1
Pea15a	0.0111826	-0.312286	0.062	0.105	1
Ubr4	0.0112512	0.159224	0.05	0.091	1
Lsmem2	0.0112805	0.00101931	0.125	0.192	1
Srsf10	0.0113385	-0.219186	0.058	0.101	1
Rpl23	0.0113993	-0.0579152	0.298	0.402	1
Cct3	0.0114688	0.0462284	0.065	0.112	1
Atp6v1b1	0.0114728	0.0067099	0.129	0.199	1
Ptbp3	0.0116	0.168669	0.115	0.182	1
6820431F20Rik	0.0116196	-0.0106766	0.097	0.154	1
Gabarap	0.011684	0.0139485	0.119	0.185	1
Tor1aip2	0.011795	0.0364161	0.045	0.084	1
Txnip	0.0118372	-0.134828	0.287	0.388	1
Maf1	0.011841	-0.087392	0.089	0.143	1
Plxnb2	0.0118484	-0.0513222	0.233	0.332	1
Ophn1	0.0119001	-0.143942	0.139	0.206	1
Wipf1	0.0119038	-0.115613	0.069	0.115	1
Dusp11	0.0119467	-0.148871	0.066	0.112	1
Nsfl1c	0.0121047	-0.121551	0.058	0.101	1
Nrd1	0.0121265	0.0820127	0.081	0.133	1
Rab3il1	0.0122196	-0.0815339	0.153	0.224	1
Ubtf	0.0123391	0.245994	0.12	0.189	1
Il4ra	0.0124675	0.0172711	0.076	0.126	1
Elmod2	0.0125248	-0.193262	0.084	0.136	1
Cask	0.0125762	-0.0490687	0.051	0.091	1
Tcf4	0.0125906	0.0236426	0.179	0.262	1
Sf3b1	0.0126694	0.0225666	0.352	0.493	1
Rps15a	0.0126923	0.204267	0.076	0.126	1
Tanc2	0.0126946	0.033071	0.235	0.336	1
Rapgefl1	0.012782	-0.115939	0.058	0.101	1
Metrnl	0.0127957	0.0156261	0.068	0.115	1
Rnd1	0.0128837	-0.080793	0.048	0.087	1
Serinc3	0.0128987	-0.140916	0.544	0.682	1
Khk	0.0129898	-0.306859	0.051	0.091	1
Pwwp2a	0.0130129	-0.157921	0.054	0.094	1
Ddx17	0.0130177	-0.0340681	0.146	0.217	1
Matn3	0.0130447	-0.0630002	0.048	0.087	1
Nufip2	0.0130522	-0.161491	0.079	0.129	1
Acer3	0.0130586	-0.0813767	0.046	0.084	1
Tma7	0.0131001	-0.0681797	0.046	0.084	1
Abca1	0.0131179	-0.027958	0.203	0.29	1
Psmd3	0.0131377	-0.127668	0.382	0.51	1
Rpl19	0.0131537	0.0496804	0.338	0.441	1
Ubr3	0.0132757	0.0487658	0.048	0.087	1
Il10rb	0.0134065	0.00977228	0.084	0.136	1
Man1a2	0.0135054	0.0157304	0.153	0.227	1
Pdcd6ip	0.0135616	0.163107	0.058	0.101	1
Atxn2l	0.0135699	0.0374659	0.063	0.108	1
Mau2	0.013608	0.00637198	0.048	0.087	1
Yme1l1	0.0136228	-0.0189859	0.069	0.115	1
Cd180	0.0136501	-0.071246	0.048	0.087	1
Nfs1	0.0136673	-0.0480628	0.066	0.112	1
Gfy	0.0137654	0.0947168	0.092	0.147	1
Tnp2	0.0138627	0.0936177	0.126	0.192	1
Rpl24	0.01388	-0.0824778	0.305	0.406	1
Ndel1	0.0138936	0.0492762	0.186	0.273	1
Krcc1	0.0140199	-0.0303359	0.064	0.108	1
Arpc4	0.0140277	-0.00124846	0.154	0.224	1
Cpsf3	0.0140456	-0.0278196	0.056	0.098	1
Tbce	0.0140535	0.117948	0.097	0.154	1
Tg	0.0141615	0.0719061	0.118	0.182	1
Olr1	0.0143828	0.126852	0.048	0.087	1
Zfand5	0.0144041	-0.0346088	0.29	0.399	1
Pmepa1	0.0144336	-0.0602119	0.299	0.409	1
Ptp4a2	0.0144878	0.0559969	0.257	0.364	1
Syce3	0.0145399	-0.0106253	0.148	0.22	1
Cdk13	0.014553	-0.019099	0.082	0.133	1
Casp8ap2	0.0145986	-0.125062	0.057	0.098	1
Exoc6	0.0146322	-0.285519	0.054	0.094	1
Cndp2	0.0146515	0.17307	0.102	0.161	1
Clk2	0.0146602	-0.174038	0.065	0.108	1
Vezf1	0.0146752	-0.0715907	0.051	0.091	1
Mydgf	0.0146797	-0.00235811	0.054	0.094	1
Nfam1	0.0147864	0.123164	0.139	0.21	1
Mfhas1	0.0147996	0.11172	0.048	0.087	1
Prpf8	0.0149303	-0.134597	0.049	0.087	1
Psmb4	0.0149589	-0.107642	0.141	0.206	1
Laptm4a	0.0149727	0.155439	0.17	0.252	1
Dock4	0.0150187	0.0532636	0.114	0.175	1
Ppp2r2a	0.0150421	-0.0222464	0.064	0.108	1
Samhd1	0.01532	0.143051	0.048	0.087	1
Rab3gap1	0.0153594	-0.0417674	0.058	0.101	1
Thoc2	0.0153995	0.0893992	0.095	0.15	1
Fam114a2	0.0154009	0.0495339	0.092	0.147	1
Fhod1	0.0155517	-0.112757	0.07	0.115	1
Abca9	0.0157035	0.0549538	0.287	0.399	1
Ppp1r18	0.015735	0.0229624	0.098	0.154	1
Sla	0.0157353	0.169382	0.138	0.21	1
Wasf2	0.0158739	0.067345	0.253	0.364	1
Lgals9	0.0159227	-0.175147	0.079	0.126	1
Atp2c1	0.0160458	-0.0525364	0.104	0.161	1
Wdr26	0.0160524	0.0291884	0.173	0.252	1
Ube2k	0.0160898	0.139639	0.058	0.101	1
Spire1	0.0161088	-0.191182	0.07	0.115	1
Tnnc2	0.0162146	-0.0245749	0.188	0.269	1
Atad2b	0.0162508	-0.0990721	0.054	0.094	1
Bean1	0.0162557	-0.131175	0.088	0.14	1
Per2	0.0162701	0.0626626	0.138	0.206	1
Nras	0.0162772	0.0978017	0.051	0.091	1
Tex261	0.0162805	0.0899163	0.077	0.126	1
Cldn1	0.0163358	0.0551395	0.186	0.273	1
Grm2	0.016392	-0.086199	0.193	0.276	1
Tcam1	0.0164208	0.213436	0.058	0.101	1
Ppp1cc	0.0166407	-0.103953	0.102	0.157	1
Gm2a	0.0167722	0.203268	0.061	0.105	1
Prkag1	0.0168346	-0.0473289	0.093	0.147	1
Prn	0.0168952	-0.101355	0.062	0.105	1
Spred1	0.0169255	-0.119623	0.062	0.105	1
Myo1f	0.0170434	0.13988	0.074	0.122	1
Akr1b10	0.0170555	-0.140114	0.068	0.112	1
Eef1b2	0.0170892	0.086995	0.176	0.255	1
Pafah1b1	0.0171203	0.184275	0.14	0.213	1
Gapdhs	0.0171364	-0.110721	0.223	0.294	1
Xrn2	0.0171543	0.0485999	0.093	0.147	1
Hvcn1	0.0172125	-0.136421	0.141	0.206	1
Ddx39	0.0172202	0.0889182	0.098	0.154	1
Rnf130	0.0172675	0.0685241	0.151	0.224	1
Rnaset2a	0.0173337	-0.0618601	0.333	0.427	1
Ncbp3	0.0173553	-0.0519406	0.062	0.105	1
Ncapg2	0.0173637	-0.101377	0.052	0.091	1
Taok1	0.0173688	0.213087	0.118	0.182	1
Prc1	0.0174009	0.269541	0.153	0.231	1
Palb2	0.0174401	0.189794	0.093	0.147	1
Abi3	0.0174846	0.0531128	0.187	0.269	1
Ddx21	0.0175679	0.050141	0.101	0.157	1
Btf3	0.0176458	-0.085682	0.11	0.168	1
Pik3r5	0.017651	-0.106996	0.047	0.084	1
9930111J21Rik2	0.0176814	-0.0427231	0.201	0.276	1
Vps35	0.0177016	-0.177651	0.081	0.129	1
Tpm3-rs7	0.0178356	-0.139878	0.173	0.245	1
Nop53	0.0178521	-0.0542375	0.089	0.14	1
Pnpt1	0.0179692	-0.0302115	0.124	0.185	1
Ppp3ca	0.0180083	0.00349351	0.094	0.147	1
Adam15	0.0180124	-0.13414	0.066	0.108	1
Zfp207	0.0180679	0.0597078	0.059	0.101	1
Sh3kbp1	0.0180685	0.0902975	0.069	0.115	1
Lat2	0.0181201	-0.0560744	0.092	0.143	1
Pias1	0.0181335	-0.152419	0.05	0.087	1
Nfe2l1	0.0182176	-0.119127	0.066	0.108	1
Hif1an	0.0182326	0.166734	0.047	0.084	1
Huwe1	0.0183115	-0.166609	0.092	0.143	1
Bzw1	0.0184087	0.0946342	0.108	0.168	1
Narf	0.0184809	0.0601928	0.088	0.14	1
Bnip2	0.0185541	-0.0974126	0.068	0.112	1
Caap1	0.0186605	-0.151531	0.077	0.122	1
Morf4l2	0.0187542	0.0245652	0.078	0.126	1
Prkcd	0.0188148	0.0103934	0.206	0.29	1
Leprotl1	0.0189068	-0.181648	0.061	0.101	1
Sp110	0.0190153	-0.262243	0.069	0.112	1
Ikzf1	0.0190947	0.0877548	0.217	0.308	1
Actb	0.0191742	0.127535	0.956	0.962	1
Nuak1	0.0191884	-0.0297168	0.16	0.231	1
Arvcf	0.0192079	-0.377315	0.046	0.08	1
Ep400	0.0192403	0.260341	0.049	0.087	1
Bod1	0.0192532	-0.0613714	0.13	0.192	1
Nanp	0.0192557	0.0312118	0.107	0.164	1
Atraid	0.0192652	-0.104843	0.058	0.098	1
Map11	0.0192814	0.0639651	0.104	0.161	1
Gosr1	0.0193591	-0.0305751	0.106	0.161	1
Ldha	0.0193716	-0.0734335	0.081	0.129	1
Gcn1l1	0.0193815	0.00139603	0.074	0.119	1
Pik3ap1	0.0194603	-0.141483	0.088	0.136	1
Trir	0.0195776	-0.0634778	0.055	0.094	1
Tbxas1	0.019599	0.103296	0.114	0.175	1
Psma4	0.0197247	-0.0272974	0.081	0.129	1
Cbln1	0.0197725	0.0732132	0.062	0.105	1
Ptk2	0.0198259	0.0151647	0.071	0.115	1
Pitpna	0.0198812	-0.138759	0.096	0.147	1
Syngr1	0.0199859	0.0167029	0.208	0.294	1
Smarca4	0.0201676	0.0126321	0.087	0.136	1
Smurf2	0.0202902	-0.0482914	0.09	0.14	1
Ehmt2	0.0203644	-0.21574	0.064	0.105	1
Tax1bp1	0.020459	0.00230975	0.154	0.224	1
Ddx3y	0.0207064	0.132067	0.094	0.147	1
Rbpj	0.0209281	0.0743303	0.058	0.098	1
Ube2h	0.0209351	0.146453	0.078	0.126	1
Mcfd2	0.0209537	-0.18979	0.077	0.122	1
Myof	0.0209758	-0.18697	0.074	0.119	1
Cct8	0.0210266	-0.00760677	0.073	0.119	1
Hsd17b11	0.0210401	0.0241321	0.11	0.168	1
Add1	0.0210882	-0.0594033	0.088	0.136	1
Usp9x	0.0210939	-0.0830577	0.069	0.112	1
Tpp2	0.0211384	-0.0244416	0.087	0.136	1
Gtf2f1	0.0212254	-0.0814144	0.061	0.101	1
Tbl1x	0.0212479	-0.238061	0.064	0.105	1
Skil	0.0212514	0.00428942	0.286	0.395	1
Ier3ip1	0.0213406	-0.039924	0.053	0.091	1
Mertk	0.0214084	-0.0482752	0.354	0.479	1
Chd4	0.0214503	-0.0655309	0.279	0.381	1
Rps23-ps2	0.0215416	-0.0202368	0.053	0.091	1
Rbm39	0.0215876	-0.0029135	0.383	0.51	1
Arhgap4	0.0216778	-0.17063	0.091	0.14	1
Coa3	0.0219699	-0.00716622	0.04	0.073	1
Mxd4	0.022033	0.00616538	0.079	0.126	1
Fam120b	0.022114	0.0550507	0.045	0.08	1
Slc7a7	0.0222111	-0.00560282	0.051	0.087	1
Rpl31	0.0223109	-0.16252	0.221	0.294	1
Ppp6r1	0.0223126	-0.223935	0.081	0.126	1
Pik3cd	0.0223936	-0.10497	0.074	0.119	1
Mapk14	0.0224288	0.0414058	0.1	0.154	1
Sirt7	0.0224515	0.0110721	0.111	0.168	1
Rpl35	0.0226076	-0.0236156	0.135	0.199	1
Lyg1	0.0226448	0.0557426	0.181	0.259	1
Il17ra	0.0227104	-0.00061287	0.111	0.168	1
Suds3	0.0227998	0.130261	0.169	0.245	1
Etf1	0.0228206	-0.173051	0.075	0.119	1
Ercc5	0.0228792	-0.223014	0.065	0.105	1
Tut7	0.022975	0.0413218	0.189	0.266	1
Eef1d	0.0229793	-0.107719	0.054	0.091	1
Rack1	0.0230884	0.20134	0.242	0.346	1
Scaf8	0.0231067	-0.0670948	0.043	0.077	1
Tsc22d4	0.0231284	-0.0101965	0.102	0.154	1
Cep250	0.0231926	-0.108898	0.054	0.091	1
Arhgef6	0.0232392	-0.0926141	0.062	0.101	1
Serinc1	0.0233309	-0.0305155	0.182	0.259	1
Id2	0.0233864	-0.00264244	0.082	0.129	1
Ghitm	0.0235074	0.068339	0.079	0.126	1
Ubxn4	0.0237082	-0.113443	0.132	0.189	1
Paxbp1	0.0240182	0.0854844	0.056	0.094	1
Dync1h1	0.0240516	0.0330704	0.114	0.171	1
Mks1	0.0243112	0.0884881	0.069	0.112	1
Rpl29	0.0243843	0.13392	0.198	0.276	1
Dpy19l4	0.0244	-0.0701447	0.051	0.087	1
Uhrf1bp1l	0.0244039	-0.0745458	0.043	0.077	1
Cd63	0.0244042	-0.0517763	0.155	0.22	1
Cep68	0.024433	0.145118	0.1	0.154	1
Ppp2r5c	0.0245241	0.0128416	0.103	0.157	1
Nfkbib	0.0245374	-0.121751	0.051	0.087	1
Arpc5l	0.0246376	-0.106665	0.136	0.196	1
Fus	0.0247622	0.0354866	0.272	0.371	1
Trim47	0.024794	-0.129174	0.057	0.094	1
Slc8a1	0.0248052	0.0411562	0.072	0.115	1
Cbx5	0.0249537	-0.112174	0.051	0.087	1
Folr1	0.0251228	0.0445612	0.142	0.206	1
Slc12a6	0.0251974	-0.118779	0.049	0.084	1
Blk	0.0252485	0.019987	0.132	0.192	1
Cd68	0.0253895	-0.040977	0.158	0.224	1
Git2	0.0256304	0.0725939	0.13	0.192	1
Uba1	0.0257882	0.0878419	0.069	0.112	1
Slc7a8	0.0258195	0.0192597	0.062	0.101	1
Lst1	0.0261235	0.0895278	0.088	0.136	1
Stat6	0.0261649	0.0129977	0.096	0.147	1
Hoxb2	0.0262146	0.0473212	0.069	0.112	1
Xrn1	0.0262372	0.0179411	0.072	0.115	1
Rgs22	0.0262916	-0.145427	0.047	0.08	1
Hhex	0.0263628	-0.0708746	0.07	0.112	1
Arih1	0.0263974	-0.113323	0.049	0.084	1
Eif6	0.0265625	-0.121832	0.054	0.091	1
Bcl2	0.0265725	-0.125452	0.114	0.168	1
Kxd1	0.026616	-0.0159764	0.209	0.287	1
Jade2	0.0266362	0.00320119	0.094	0.143	1
Pold2	0.0266538	0.113049	0.141	0.206	1
Snx2	0.0268715	0.114595	0.054	0.091	1
Hsp90b1	0.0269491	-0.120536	0.578	0.717	1
Fsip1	0.0269735	-0.0519913	0.084	0.129	1
Amfr	0.027103	-0.153373	0.068	0.108	1
Slc1a3	0.0275576	-0.00227229	0.075	0.119	1
Saraf	0.0277233	0.175476	0.141	0.206	1
Noa1	0.0278199	0.0132091	0.1	0.15	1
Pdia4	0.0278653	-0.0647087	0.087	0.133	1
Eif3j1	0.0278945	-0.0783375	0.079	0.122	1
Bcor	0.027902	0.114744	0.062	0.101	1
Rbm8a	0.0279925	-0.0733882	0.047	0.08	1
Tmem173	0.0282576	0.035372	0.139	0.203	1
Ubap2	0.0282676	0.0114127	0.086	0.133	1
Cerk	0.0283323	0.112258	0.26	0.357	1
Exosc4	0.0285373	0.0789075	0.067	0.108	1
mt-Nd4	0.0286164	0.0180857	0.413	0.542	1
Helz	0.0288367	0.140012	0.059	0.098	1
Ddx6	0.0289545	0.112064	0.238	0.336	1
Runx1	0.0289637	-0.147954	0.06	0.098	1
Usp24	0.0291795	-0.0830482	0.092	0.14	1
Csf2ra	0.0293824	-0.0111696	0.052	0.087	1
Chd6	0.0294639	-0.0247276	0.076	0.119	1
Rpl36a	0.0294858	0.158496	0.104	0.157	1
Gnai2	0.0296373	0.0754934	0.414	0.566	1
Sema3e	0.0296399	-0.0303974	0.09	0.136	1
Fgd4	0.029698	-0.0981151	0.044	0.077	1
Tmed5	0.0297689	0.0722261	0.113	0.168	1
Itpripl2	0.0298724	0.0357139	0.047	0.08	1
Lman2	0.029949	-0.0200334	0.114	0.168	1
Eif4e3	0.0300358	0.16964	0.16	0.231	1
Lrch1	0.0302062	0.105863	0.057	0.094	1
Asap1	0.0303329	-0.121634	0.096	0.143	1
Hnrnpc	0.0304101	0.0925248	0.14	0.203	1
Kpna3	0.0305799	-0.301376	0.051	0.084	1
Hadha	0.03058	0.154014	0.065	0.105	1
Eif3f	0.0306265	0.0210391	0.089	0.136	1
Pign	0.0307323	-0.133807	0.096	0.143	1
Rab11fip5	0.0308031	0.165212	0.075	0.119	1
Ppp1ca	0.0308817	0.143437	0.11	0.164	1
Rasgrp3	0.0309397	0.0143917	0.204	0.283	1
Slc11a1	0.0309903	-0.012012	0.154	0.217	1
Lrpap1	0.031197	0.0648851	0.07	0.112	1
Uba52	0.0313275	-0.0159605	0.202	0.276	1
Nap1l1	0.031328	-0.0270279	0.044	0.077	1
St6galnac4	0.0316052	0.0641054	0.073	0.115	1
Ascl2	0.031699	0.0502283	0.094	0.143	1
Qk	0.0317987	-0.0268008	0.358	0.476	1
Dynlrb2	0.0322857	0.038621	0.06	0.098	1
Rpl13a	0.0324095	0.0515574	0.361	0.479	1
Tlr13	0.0325799	0.230437	0.088	0.136	1
Zup1	0.0326291	0.125982	0.042	0.073	1
Srp14	0.0330024	0.0496433	0.052	0.087	1
T2	0.033127	0.255299	0.263	0.371	1
Gtpbp4	0.033396	0.0342198	0.055	0.091	1
Dao	0.0334952	0.248248	0.186	0.269	1
Abcc3	0.0335077	0.0292472	0.133	0.192	1
Rps25	0.0336965	-0.194498	0.078	0.119	1
Brd2	0.0337066	0.0164962	0.373	0.5	1
Taok2	0.0337254	-0.144008	0.048	0.08	1
Nfatc1	0.0337297	-0.0902951	0.061	0.098	1
Trpv2	0.0338658	-0.149352	0.053	0.087	1
Dock8	0.0339512	0.0427973	0.128	0.185	1
Arhgap39	0.0340067	0.0337562	0.058	0.094	1
Fam13b	0.0340461	-0.100573	0.053	0.087	1
Mtbp	0.0341015	0.113927	0.073	0.115	1
Csnk2a1	0.0343664	0.0670292	0.071	0.112	1
Rasgef1b	0.0344292	0.0232977	0.119	0.175	1
Gpr155	0.0345232	0.00737511	0.081	0.126	1
Rpl10-ps3	0.0347865	0.0467751	0.22	0.294	1
Ets2	0.0349961	0.0537525	0.055	0.091	1
Tmem59	0.0353776	-0.0634541	0.107	0.157	1
Tapbp	0.0353979	0.092585	0.139	0.199	1
Rpl22	0.0356051	0.0934953	0.055	0.091	1
Bcl2a1b	0.0356771	-0.157072	0.062	0.098	1
Tmem176a	0.0357062	0.0753115	0.077	0.119	1
Cln8	0.0358991	0.0128884	0.101	0.15	1
Stk17b	0.0359262	0.012814	0.053	0.087	1
Ppp4r3a	0.0359638	0.189819	0.089	0.136	1
Il6ra	0.0359648	-0.0887421	0.371	0.483	1
Ttc14	0.036192	0.134085	0.055	0.091	1
Unc93b1	0.0361942	0.0417918	0.316	0.427	1
Neurl3	0.0363193	0.0622769	0.092	0.14	1
Slc12a9	0.0364585	-0.0591521	0.077	0.119	1
Pycard	0.0365573	0.00531219	0.113	0.164	1
Sec11c	0.0365848	0.000968471	0.072	0.112	1
Ldlrad4	0.036724	-0.0405206	0.058	0.094	1
Marcksl1	0.0368826	0.0984034	0.082	0.126	1
Ikbke	0.0369991	-0.0450949	0.066	0.105	1
Lrch4	0.0372619	-0.0885035	0.056	0.091	1
Mkrn1	0.0373365	0.0714721	0.082	0.126	1
Nfxl1	0.0373516	0.0188554	0.066	0.105	1
Gapvd1	0.0374888	-0.0696206	0.14	0.196	1
Slc25a3	0.0376408	0.267616	0.152	0.22	1
Col27a1	0.037751	0.145753	0.135	0.196	1
Acyp2	0.0377681	0.137424	0.16	0.227	1
Stard9	0.0379192	0.17146	0.116	0.171	1
Sipa1	0.0379329	-0.0118193	0.236	0.318	1
Zc3h18	0.0379508	0.0820295	0.069	0.108	1
Cntf	0.0381568	0.225635	0.121	0.178	1
Usf2	0.0386458	0.20298	0.108	0.161	1
Golga4	0.0387266	-0.215677	0.12	0.171	1
Naa15	0.0387905	0.119798	0.106	0.157	1
Tspan3	0.0388076	-0.158601	0.069	0.108	1
Srek1	0.0389792	0.0519828	0.08	0.122	1
Ppia	0.0389826	0.101202	0.254	0.336	1
Pnrc2	0.0390074	0.0410257	0.08	0.122	1
Gpatch8	0.0390765	0.00241961	0.048	0.08	1
Tmem176b	0.0391144	0.042374	0.197	0.273	1
Dnajb14	0.0391514	-0.0151161	0.084	0.126	1
Pcbp1	0.0393289	0.214912	0.134	0.196	1
Hnrnpab	0.0395841	-0.169007	0.174	0.238	1
Ddx23	0.0396315	0.0920048	0.051	0.084	1
Dnajc13	0.0396657	-0.0300626	0.084	0.126	1
Cygb	0.0397762	0.225399	0.175	0.248	1
Cox6a1	0.0399355	0.228326	0.045	0.077	1
Baz1b	0.0401369	0.0868588	0.137	0.196	1
Eif4a3	0.0402093	0.103979	0.058	0.094	1
Epc1	0.0402582	0.0116714	0.048	0.08	1
Exoc3l	0.0403884	-0.0218168	0.099	0.147	1
Wls	0.0404581	-0.220297	0.076	0.115	1
Hmgb1-ps2	0.0406988	-0.0304263	0.057	0.091	1
Tmbim6	0.0407069	0.0996179	0.384	0.528	1
Setd3	0.040926	-0.0549612	0.078	0.119	1
Mfap1a	0.0409551	-0.0869022	0.096	0.14	1
Eif4a1	0.0410976	0.0753608	0.174	0.241	1
Snap25	0.0413084	0.0257917	0.056	0.091	1
Tuba1b	0.041633	0.0967166	0.305	0.395	1
Gal3st4	0.0417665	0.071454	0.128	0.182	1
Rtel1	0.0421741	-0.0148055	0.062	0.098	1
Cx3cr1	0.0423345	-0.0937234	0.907	0.962	1
Rpl34	0.0424561	-0.0684136	0.125	0.175	1
Xiap	0.0426081	-0.00774328	0.067	0.105	1
Nenf	0.0426509	0.0355316	0.182	0.252	1
Dazap2	0.0429227	0.166213	0.101	0.15	1
Stmnd1	0.0431101	-0.149117	0.068	0.105	1
Trim28	0.0433373	0.0620165	0.062	0.098	1
Cct7	0.0437017	0.103437	0.091	0.136	1
St3gal5	0.0445211	-0.0727317	0.161	0.22	1
Errfi1	0.0445884	-0.320364	0.052	0.084	1
Hook2	0.0446408	0.120659	0.138	0.196	1
Akap13	0.0446464	-0.0497402	0.256	0.339	1
Podn	0.0446786	-0.114819	0.07	0.108	1
Slc44a2	0.0448159	0.111224	0.054	0.087	1
Ube2e1	0.0451915	-0.101436	0.054	0.087	1
Bin2	0.0452887	0.130462	0.323	0.437	1
Bst2	0.0456724	-0.071076	0.329	0.434	1
Sppl2a	0.0457763	0.0990961	0.124	0.178	1
Mrm1	0.0458787	0.091897	0.075	0.115	1
Syk	0.0460522	0.0532332	0.279	0.378	1
Sdcbp	0.0460621	-0.0524333	0.104	0.15	1
Ctsa	0.0461774	-0.0484534	0.483	0.619	1
Epb41l2	0.0462873	0.0190796	0.399	0.524	1
Glrx3	0.0463635	0.0327579	0.049	0.08	1
Ttc3	0.0464422	0.120717	0.084	0.126	1
Pmis2	0.0468831	0.0807006	0.057	0.091	1
Tmem234	0.0469584	0.178524	0.086	0.129	1
Dgkz	0.0471214	-0.042288	0.054	0.087	1
Rac2	0.0473404	-0.00499881	0.047	0.077	1
Tubb5	0.0474355	-0.0408021	0.137	0.192	1
Hp1bp3	0.047691	0.178347	0.174	0.245	1
Klhl6	0.047851	0.220089	0.054	0.087	1
Nup153	0.0479429	-0.0694823	0.052	0.084	1
Slc25a4	0.0479489	0.227293	0.083	0.126	1
Stau1	0.04826	0.0894814	0.062	0.098	1
Ythdf3	0.0484487	0.206354	0.043	0.073	1
Ergic3	0.0485673	0.043371	0.081	0.122	1
Lmod1	0.0488048	-0.12721	0.086	0.126	1
Tinagl1	0.0490044	0.128855	0.13	0.185	1
Wbp4	0.049297	0.250783	0.062	0.098	1
Tspan7	0.0493126	0.0726755	0.057	0.091	1
Irf9	0.0495395	0.0611676	0.047	0.077	1
Fasn	0.0495919	0.0464657	0.039	0.066	1
Herc1	0.0496745	0.233286	0.148	0.21	1
Ubc	0.0496801	-0.128308	0.786	0.895	1
Ythdf2	0.0499988	0.256776	0.104	0.154	1
Flrt3	0.0501364	-0.0711253	0.236	0.308	1
Dennd1b	0.0501536	0.0886361	0.084	0.126	1
Commd9	0.0509184	0.0470685	0.192	0.262	1
Eif4h	0.0510481	0.0627859	0.081	0.122	1
Zc3h13	0.0511057	0.0340018	0.066	0.101	1
Nbea	0.0511503	-0.288869	0.072	0.108	1
Syngr2	0.0512203	-0.0221179	0.148	0.203	1
H13	0.0515175	0.0725975	0.062	0.098	1
Arhgdia	0.0515521	0.0414594	0.096	0.14	1
Gng10	0.0518088	0.124607	0.078	0.119	1
Trip11	0.0519021	-0.0786558	0.101	0.147	1
Ncl	0.0519396	-0.02549	0.338	0.441	1
Ehmt1	0.0520182	-0.122187	0.05	0.08	1
Slc25a5	0.0521634	0.189617	0.154	0.217	1
Casp1	0.0523997	0.0479252	0.228	0.304	1
Plekha2	0.0524395	0.0617621	0.06	0.094	1
Arhgap30	0.052637	0.107226	0.084	0.126	1
Atp5md	0.0533781	0.218707	0.062	0.098	1
Csnk1d	0.0533993	0.122163	0.073	0.112	1
Rspo1	0.0534369	0.234294	0.152	0.213	1
Cetn4	0.0534602	0.144739	0.062	0.098	1
Smchd1	0.053692	0.210969	0.095	0.14	1
Keap1	0.0539174	-0.153399	0.058	0.091	1
Syt2	0.0541007	-0.287977	0.048	0.077	1
Negr1	0.054291	-0.0187334	0.058	0.091	1
Tut4	0.0543344	-0.119314	0.089	0.129	1
Pip5k1c	0.0544219	0.0689799	0.05	0.08	1
Tnnt3	0.0545029	-0.130216	0.09	0.129	1
Rab5c	0.0546507	-0.184407	0.056	0.087	1
Rb1cc1	0.0548301	0.0532649	0.069	0.105	1
Ascl5	0.0553033	-0.00828077	0.066	0.101	1
Lrmp	0.0554659	0.114803	0.044	0.073	1
Gmeb2	0.0556857	0.0630782	0.189	0.259	1
Zfp608	0.0556928	-0.103429	0.058	0.091	1
Psma7	0.056007	0.0683874	0.099	0.143	1
Shisa5	0.0562422	0.119848	0.077	0.115	1
Plekhb2	0.0563796	-0.101741	0.053	0.084	1
Cul5	0.056476	0.0136831	0.047	0.077	1
Nucks1	0.0569535	0.0861213	0.074	0.112	1
Ypel3	0.0574708	-0.0536577	0.119	0.168	1
Zfp36l1	0.0577629	0.121341	0.13	0.185	1
Ube2d2a	0.057852	-0.0944177	0.089	0.129	1
Aars	0.0583593	0.0713173	0.091	0.133	1
Tcerg1l	0.0585583	0.0891953	0.071	0.108	1
Bnip3	0.0585759	-0.0177371	0.078	0.115	1
Gpsm3	0.0592277	0.260672	0.073	0.112	1
Psmd11	0.0597296	-0.0475267	0.051	0.08	1
Ccdc50	0.0598824	0.00608013	0.133	0.189	1
Lrrc58	0.0601414	0.153758	0.061	0.094	1
Gaa	0.0602522	0.283396	0.089	0.133	1
Vwa5a	0.0605098	-0.223486	0.058	0.091	1
Ube2q1	0.0606567	-0.184934	0.079	0.115	1
Oxct1	0.0608368	0.0143105	0.19	0.255	1
Fbxo3	0.061028	0.14144	0.253	0.343	1
Pdgfb	0.0616031	-0.010596	0.067	0.101	1
Smarca5	0.0618139	-0.0194285	0.107	0.15	1
Rpl18a	0.0620568	-0.0203478	0.362	0.451	1
Ywhah	0.0621835	-0.0537055	0.259	0.332	1
Pcmt1	0.0626165	0.0320232	0.051	0.08	1
Fbxo33	0.0629889	0.298456	0.052	0.084	1
Traf3ip3	0.0630176	-0.0028592	0.054	0.084	1
Il21r	0.0630918	0.0861266	0.116	0.164	1
Zmym5	0.0632015	0.074092	0.075	0.112	1
Tomm20l	0.0634845	-0.162076	0.057	0.087	1
Fnbp1l	0.0636339	0.195344	0.121	0.171	1
Rpl17-ps10	0.0638107	0.195253	0.076	0.045	1
Trim30a	0.0638151	-0.105249	0.082	0.119	1
Sbf1	0.0643176	0.297314	0.103	0.15	1
Nln	0.0643198	0.0618737	0.117	0.164	1
Rcbtb2	0.0645795	0.0918937	0.103	0.147	1
Plagl1	0.0648246	0.250497	0.227	0.315	1
Map4	0.0652752	-0.0144176	0.054	0.084	1
Kdm2a	0.0653129	0.0556497	0.069	0.105	1
Iffo1	0.0657771	0.16547	0.077	0.115	1
Zfp217	0.0658126	-0.186648	0.051	0.08	1
Ankrd17	0.0659597	0.141159	0.102	0.147	1
Terf2	0.0659696	0.0751483	0.058	0.091	1
Ighe	0.0662413	0.142478	0.207	0.276	1
Ccdc93	0.0662493	-0.0364656	0.078	0.115	1
Nbeal2	0.0662829	0.1705	0.114	0.161	1
Hnrnpr	0.06644	0.218529	0.066	0.101	1
Fam117b	0.0670478	0.132429	0.069	0.105	1
Ino80	0.0672837	-0.193475	0.072	0.105	1
Ino80d	0.0674888	-0.0116024	0.046	0.073	1
Vsir	0.0676948	-0.0707762	0.621	0.755	1
Rpl9-ps4	0.0678224	0.260579	0.066	0.038	1
Clstn2	0.0683258	0.0301773	0.065	0.098	1
Lpcat2	0.068432	-0.00185422	0.377	0.486	1
Flad1	0.0686242	-0.00761691	0.059	0.091	1
Ncf1	0.0687888	0.239276	0.262	0.357	1
Dync1li2	0.0691221	0.281801	0.133	0.189	1
Sirt2	0.0695145	-0.0819708	0.057	0.087	1
Gprasp1	0.0697973	0.203185	0.056	0.087	1
Arhgap45	0.0700138	0.109998	0.421	0.552	1
Rps16	0.0701301	0.142657	0.185	0.245	1
Sash3	0.0703075	0.12642	0.048	0.077	1
Trio	0.0704402	0.0796205	0.087	0.126	1
Cers3	0.0705762	0.281747	0.085	0.126	1
2007-03-01	0.0707451	0.110209	0.079	0.115	1
Tnfaip8l2	0.0708372	0.0729464	0.07	0.105	1
Tmem86a	0.0710043	0.127677	0.119	0.168	1
Adcy7	0.0710611	0.0280581	0.051	0.08	1
Cnot8	0.0712829	0.00308672	0.07	0.105	1
Wdr81	0.0714666	0.0729053	0.065	0.098	1
Grcc10	0.0717166	0.128669	0.076	0.112	1
Lysmd2	0.0722306	0.112056	0.059	0.091	1
Cyth4	0.0724921	-0.0231622	0.444	0.559	1
Hdac5	0.0728402	0.0278694	0.057	0.087	1
Maf	0.0736142	0.198846	0.676	0.731	1
Arf4	0.0736216	0.0138284	0.057	0.087	1
Atp6ap1	0.0741505	0.0129609	0.104	0.147	1
Arhgap25	0.0742009	-0.122596	0.09	0.129	1
Zscan26	0.0744269	-0.244428	0.054	0.084	1
Cenpx	0.0748013	0.133473	0.09	0.129	1
Mtch1	0.0751828	0.115617	0.062	0.094	1
Styx	0.0759384	-0.0648384	0.063	0.094	1
Ube2l3	0.0763689	-0.101555	0.111	0.154	1
Arglu1	0.0764315	0.181411	0.089	0.129	1
Csnk1a1	0.0764987	0.158272	0.195	0.266	1
Smap2	0.0767298	0.102011	0.337	0.444	1
Sft2d1	0.0768885	0.190218	0.186	0.252	1
Fscb	0.0773639	0.0926255	0.049	0.077	1
Prrc2c	0.0779062	0.102483	0.208	0.276	1
Sec61a1	0.0779109	0.0794291	0.087	0.126	1
Npm1	0.0782043	0.0910584	0.161	0.213	1
Milr1	0.0784919	0.177551	0.103	0.147	1
Fkbp8	0.0788053	0.199334	0.098	0.14	1
Stub1	0.0790362	0.160506	0.062	0.094	1
Lrrc3	0.0793289	0.0606336	0.125	0.171	1
Rpl13	0.079364	-0.0268652	0.354	0.42	1
Camk1d	0.079582	-0.0155833	0.066	0.098	1
Supt4a	0.0796043	0.260717	0.051	0.08	1
2001-03-01	0.080403	0.0759752	0.2	0.266	1
Tango2	0.0807764	0.0843958	0.159	0.217	1
Tsr2	0.0808328	-0.0491738	0.476	0.598	1
Tent5a	0.0815145	0.716307	0.225	0.196	1
Csf1r	0.081907	0.07555	0.903	0.934	1
Ctsz	0.081994	-0.0526918	0.504	0.643	1
Stard3	0.0821476	0.304766	0.139	0.196	1
Ifrd1	0.082471	0.128971	0.107	0.15	1
Nup88	0.0826793	0.097037	0.054	0.084	1
Prex1	0.0831054	0.0765747	0.225	0.297	1
Secisbp2l	0.083542	0.121426	0.146	0.199	1
Plk1	0.0836394	0.158444	0.148	0.203	1
Ddx54	0.0837021	0.0889853	0.069	0.101	1
Rbm6	0.0837654	0.187993	0.082	0.119	1
Smc4	0.0840616	0.240188	0.041	0.066	1
Rbm19	0.0848917	0.334804	0.073	0.108	1
Snx10	0.0860967	0.710203	0.072	0.045	1
Ppp1r21	0.0863323	0.234047	0.079	0.115	1
Tmem135	0.0864726	-0.0824016	0.069	0.101	1
Snx29	0.0865017	0.111949	0.052	0.08	1
Dtx4	0.0865602	0.137828	0.096	0.136	1
Hnrnpa3	0.0868062	0.125674	0.232	0.294	1
Adh5	0.0869118	0.21585	0.054	0.084	1
Asb6	0.0870009	-0.0813855	0.069	0.101	1
Znfx1	0.0872108	0.173212	0.066	0.098	1
Itm2c	0.0877291	0.0533131	0.369	0.479	1
Dusp6	0.087821	0.129775	0.163	0.22	1
Gna15	0.0881437	0.140264	0.17	0.227	1
Slc38a2	0.0881721	0.127193	0.105	0.147	1
Psmb6	0.0882488	0.0724963	0.058	0.087	1
Rpl35a	0.0882659	0.196452	0.167	0.217	1
Ccn4	0.0882684	0.00994314	0.152	0.203	1
Ap4e1	0.0883051	0.0562484	0.055	0.084	1
Rps5	0.088357	0.118666	0.498	0.619	1
Taf1d	0.0885452	0.0697117	0.123	0.168	1
Adss	0.0885458	0.0745682	0.061	0.091	1
Specc1	0.0890503	0.207176	0.146	0.199	1
Psmc5	0.0891058	0.111334	0.069	0.101	1
Pgm5	0.0893083	0.0630187	0.061	0.091	1
Mapk1ip1	0.089695	0.322613	0.054	0.084	1
H2-D1	0.0897013	0.188263	0.23	0.304	1
Zfp148	0.0902892	0.0185128	0.096	0.133	1
Klhl24	0.0905601	0.0885079	0.091	0.129	1
Ankef1	0.090684	-0.0282109	0.051	0.077	1
Smarce1	0.0914324	0.00358553	0.061	0.091	1
Bet1l	0.0915255	0.0816089	0.199	0.266	1
Atp6v1d	0.0915901	0.273236	0.054	0.084	1
Actr2	0.0922316	0.344408	0.17	0.234	1
Osbpl9	0.0922385	0.195229	0.052	0.08	1
Eya1	0.0923031	-0.258544	0.077	0.108	1
Rps4x	0.0926733	0.107209	0.32	0.413	1
Rtf1	0.0926801	0.0132637	0.073	0.105	1
Csnk2a2	0.0930642	-0.0203127	0.056	0.084	1
Efhd2	0.0931538	0.205543	0.257	0.343	1
Cog5	0.0934067	0.266785	0.077	0.112	1
H2-DMb1	0.0939234	0.0517614	0.053	0.08	1
Inpp5d	0.0945515	0.0701906	0.205	0.276	1
Puf60	0.0946791	-0.079743	0.065	0.094	1
Samt1	0.0950865	0.227778	0.208	0.276	1
Mpc1	0.0957726	0.273952	0.063	0.094	1
Vps28	0.0959538	0.125116	0.047	0.073	1
Ppp6r3	0.0961809	0.136073	0.047	0.073	1
Apoc1	0.0972083	0.116857	0.058	0.087	1
Eif5	0.0976889	-0.00870899	0.443	0.559	1
Dytn	0.0978162	-0.0308802	0.457	0.573	1
Abcf1	0.0978803	0.151042	0.094	0.133	1
Snrnp200	0.0979305	-0.00552879	0.051	0.077	1
Rbm27	0.09805	-0.0541039	0.064	0.094	1
Ube3a	0.099287	-0.188724	0.107	0.143	1
Bag6	0.0995853	0.0722091	0.051	0.077	1
Srrm1	0.100015	0.18304	0.156	0.21	1
Upk1b	0.100306	0.138302	0.058	0.087	1
Tnfrsf1a	0.101404	-0.127936	0.088	0.122	1
Tm9sf2	0.101772	0.0158614	0.079	0.112	1
C1qc	0.102563	-0.081398	0.616	0.748	1
Arpc2	0.103149	-0.00136668	0.293	0.374	1
Mpeg1	0.103258	-0.147901	0.466	0.552	1
Eef1a1	0.10478	-0.0491215	0.582	0.685	1
Hspa4	0.105517	0.251866	0.125	0.171	1
Gas6	0.105684	0.0745681	0.082	0.115	1
Zmynd11	0.105704	0.103829	0.125	0.168	1
Mill1	0.106249	0.0615313	0.07	0.101	1
Appbp2	0.106269	-0.0489997	0.046	0.07	1
Dcst2	0.106626	0.188084	0.075	0.108	1
Armc1	0.106902	0.12725	0.09	0.126	1
Prkcsh	0.10708	-0.0495278	0.062	0.091	1
Ankrd11	0.107283	0.195416	0.187	0.248	1
Sptan1	0.107392	-0.018023	0.057	0.084	1
Rps13-ps6	0.10745	0.367903	0.121	0.091	1
Golga3	0.107592	0.0254995	0.062	0.091	1
Fcgr2b	0.107831	0.166449	0.115	0.157	1
Fggy	0.107852	-0.151078	0.816	0.902	1
Etv3	0.108266	-0.0908789	0.063	0.091	1
Gng5	0.108547	0.313768	0.053	0.08	1
Il16	0.108608	0.190441	0.099	0.14	1
Dicer1	0.109335	0.135757	0.059	0.087	1
Rp9	0.109339	0.0143126	0.491	0.587	1
Pde5a	0.109749	0.0382927	0.066	0.094	1
Nek7	0.10981	0.302361	0.137	0.189	1
Eif4e2	0.109892	0.0994709	0.283	0.367	1
Etfbl	0.110108	0.137514	0.048	0.073	1
Cd33	0.110133	0.370747	0.125	0.175	1
Spi1	0.110617	0.0220825	0.144	0.192	1
Trpm2	0.110864	0.0617237	0.051	0.077	1
Trappc10	0.111221	0.194416	0.051	0.077	1
Ppfia1	0.111794	-0.0814513	0.06	0.087	1
Dhx36	0.112526	0.08639	0.057	0.084	1
Stk4	0.112657	0.153591	0.076	0.108	1
Lamtor1	0.113252	0.13452	0.068	0.098	1
Atp6v0d1	0.113931	0.0588989	0.051	0.077	1
Emc3	0.11503	-0.260837	0.063	0.091	1
Clk3	0.11549	-0.0427365	0.054	0.08	1
Wipi2	0.116381	0.210752	0.051	0.077	1
Heatr5a	0.116647	0.193435	0.054	0.08	1
Tlx2	0.11668	0.140883	0.062	0.091	1
Lgals8	0.116767	0.342488	0.067	0.098	1
Vav2	0.117224	0.222559	0.059	0.087	1
Dennd4a	0.117328	0.252971	0.076	0.108	1
Mrps17	0.117544	-0.0445902	0.049	0.073	1
Ccdc88b	0.117679	0.239654	0.134	0.182	1
Cst6	0.11781	-0.0068277	0.364	0.462	1
Syce1l	0.11787	0.194814	0.107	0.147	1
Add3	0.118799	0.165108	0.07	0.101	1
Bank1	0.118901	0.182725	0.077	0.108	1
Dhx15	0.119623	0.255791	0.073	0.105	1
Mapk3	0.119709	0.0606938	0.071	0.101	1
Tardbp	0.12009	0.185447	0.082	0.115	1
Wdr89	0.120466	0.140738	0.114	0.154	1
mt-Co1	0.120708	-0.030167	0.669	0.752	1
Slc6a6	0.121102	0.167115	0.068	0.098	1
Bsg	0.121508	0.220813	0.148	0.199	1
Ndufs2	0.122675	0.0526487	0.077	0.108	1
Fau	0.122723	0.17895	0.352	0.451	1
Idh2	0.122774	-0.0670159	0.072	0.101	1
Ccin	0.122867	0.186421	0.19	0.252	1
Golga2	0.122985	0.131639	0.12	0.161	1
Zfp445	0.123042	-0.0991969	0.066	0.094	1
Man1c1	0.123676	-0.00255208	0.089	0.122	1
Tent2	0.123792	0.395182	0.073	0.105	1
Zfp644	0.123908	0.169517	0.049	0.073	1
Ssr4	0.124654	0.228942	0.077	0.108	1
Mprip	0.124881	0.0785055	0.055	0.08	1
Bri3	0.125114	0.0259746	0.052	0.077	1
Klhdc4	0.125471	0.0929741	0.049	0.073	1
Hlf	0.125575	0.694245	0.165	0.14	1
Ap2s1	0.126122	0.268997	0.134	0.182	1
Numa1	0.127968	0.0510987	0.152	0.199	1
Supt5	0.129889	0.0949221	0.063	0.091	1
Vps41	0.130633	0.231309	0.049	0.073	1
Plxdc1	0.130803	0.290331	0.06	0.087	1
Slc35b1	0.130875	-0.154489	0.053	0.077	1
Vps18	0.130879	0.0513271	0.061	0.087	1
Cct4	0.131465	0.170395	0.091	0.126	1
Klf2	0.131635	0.170499	0.106	0.143	1
Uvrag	0.133049	0.201219	0.063	0.091	1
Cmip	0.133233	0.212252	0.069	0.098	1
Rbx1	0.134115	0.23045	0.165	0.217	1
Dcaf8	0.135172	0.313343	0.102	0.14	1
Api5	0.135328	0.0750226	0.058	0.084	1
Nrros	0.135797	0.0339709	0.067	0.094	1
Mllt10	0.136274	0.328037	0.058	0.084	1
Vcpip1	0.136365	0.164923	0.058	0.084	1
Smarca2	0.136974	0.0366606	0.129	0.168	1
Ripk1	0.137036	-0.121269	0.047	0.07	1
Ctr9	0.137146	0.129854	0.05	0.073	1
Plk2	0.137223	0.136695	0.121	0.161	1
Slc25a11	0.137386	0.0475471	0.076	0.105	1
Sowahc	0.137768	0.170283	0.063	0.091	1
Stip1	0.137896	0.121152	0.064	0.091	1
Tk1	0.138475	0.250168	0.103	0.14	1
Aif1	0.138492	0.106281	0.26	0.329	1
Rtf2	0.139015	0.156487	0.069	0.098	1
Tubb4b	0.139595	0.713596	0.063	0.042	1
Gulo	0.141017	0.00694294	0.507	0.615	1
Hnrnpul1	0.142218	0.0657716	0.131	0.171	1
Mlana	0.14242	0.15962	0.11	0.15	1
Adat1	0.143164	0.58593	0.068	0.045	1
Usp47	0.143205	0.080391	0.067	0.094	1
Rpl17-ps5	0.14335	0.129739	0.158	0.126	1
Fkbp4	0.143549	0.158214	0.066	0.094	1
4932438A13Rik	0.144387	0.25156	0.061	0.087	1
Ugt1a7c	0.145727	0.0216442	0.054	0.077	1
Brd1	0.146114	0.229011	0.084	0.115	1
Sec13	0.14615	0.264458	0.058	0.084	1
Pfdn5	0.146226	-0.0821908	0.088	0.119	1
Leprot	0.146939	0.19642	0.135	0.178	1
Cd300a	0.147437	-0.0122843	0.094	0.126	1
Vapb	0.147479	0.278968	0.13	0.175	1
Grap2	0.148566	0.1573	0.047	0.07	1
Dnajb1	0.148774	0.838439	0.168	0.147	1
Tuba1a	0.149198	0.0423779	0.242	0.297	1
Ctbp1	0.149364	0.271496	0.066	0.094	1
Ninl	0.149905	0.105461	0.065	0.091	1
Ptpn18	0.151322	0.169559	0.058	0.084	1
Rassf4	0.153039	0.0985489	0.088	0.119	1
Was	0.153047	0.177239	0.113	0.15	1
Tsc22d2	0.153497	-0.042513	0.065	0.091	1
Sdha	0.153512	0.0791995	0.082	0.112	1
Cited2	0.153572	0.551845	0.138	0.112	1
Slc40a1	0.153744	0.012903	0.056	0.08	1
Zmpste24	0.155125	0.104513	0.065	0.091	1
Epc2	0.155414	0.208567	0.07	0.098	1
Kcnf1	0.155505	0.456077	0.052	0.077	1
Cpd	0.155961	0.0569189	0.077	0.105	1
Atf4	0.15604	0.0875192	0.233	0.297	1
Coasy	0.15614	0.178625	0.269	0.346	1
Virma	0.156469	-0.158723	0.051	0.073	1
Ramp1	0.15782	0.00529709	0.387	0.479	1
Mlxip	0.158656	0.248803	0.107	0.143	1
Rpl27	0.159449	0.160399	0.189	0.241	1
Ppfia4	0.159684	0.133489	0.182	0.234	1
Ndufs8	0.159745	0.206808	0.084	0.115	1
Ncstn	0.160032	0.205998	0.284	0.367	1
Ms4a6b	0.160174	-0.0572022	0.046	0.066	1
Cep350	0.160527	0.0413769	0.097	0.129	1
Eif3j2	0.160642	0.0787661	0.059	0.084	1
Chordc1	0.160704	0.0198654	0.071	0.098	1
N4bp2l2	0.161749	0.101184	0.071	0.098	1
Dnase2a	0.162145	-0.0979043	0.051	0.073	1
Pusl1	0.162207	0.197716	0.093	0.126	1
Galnt1	0.163027	0.142377	0.105	0.14	1
BC004004	0.16312	-0.00319749	0.086	0.112	1
Sox30	0.163279	0.116959	0.071	0.098	1
Zfc3h1	0.163543	0.00843649	0.06	0.084	1
Bfar	0.164786	-0.0257942	0.054	0.077	1
Fubp1	0.166222	0.226393	0.09	0.122	1
Mill2	0.166494	0.305195	0.095	0.129	1
Mtdh	0.16669	0.104486	0.371	0.472	1
Wapl	0.168076	0.0994217	0.112	0.147	1
Evi5	0.168146	-0.0417743	0.063	0.087	1
Dyrk2	0.168892	0.162881	0.068	0.094	1
Slc46a3	0.168982	0.151156	0.054	0.077	1
Mdh1b	0.169196	-0.0418243	0.072	0.098	1
Rpl37	0.169557	0.232783	0.077	0.105	1
Stat3	0.16959	0.0556974	0.083	0.112	1
Snw1	0.169623	0.107113	0.088	0.119	1
Rep15	0.169943	0.206896	0.298	0.36	1
Rpl9-ps6	0.170409	0.347816	0.098	0.073	1
Gns	0.171232	0.157663	0.387	0.507	1
Ykt6	0.171364	0.066665	0.092	0.122	1
Tubgcp5	0.17223	0.122962	0.068	0.094	1
Fam193b	0.172431	0.285305	0.079	0.108	1
Gpr84	0.172495	-0.236974	0.05	0.07	1
Nagpa	0.172961	0.148657	0.086	0.115	1
Paip1	0.173116	0.134622	0.057	0.08	1
Rpl30-ps10	0.176005	-0.00127299	0.11	0.143	1
Irgm2	0.177333	0.237738	0.23	0.297	1
G3bp1	0.180343	0.27657	0.062	0.087	1
Sin3b	0.181477	-0.017302	0.064	0.087	1
Rpl26	0.181686	0.228244	0.237	0.294	1
Ndufa8	0.182812	0.0606411	0.049	0.07	1
Tfe3	0.182895	0.39862	0.099	0.133	1
Adrb2	0.183246	0.111768	0.066	0.091	1
Piezo1	0.183399	0.17753	0.046	0.066	1
Syncrip	0.184101	0.280833	0.106	0.14	1
Ostf1	0.184339	0.118861	0.089	0.119	1
Trafd1	0.185005	0.114149	0.089	0.119	1
Herc2	0.186877	0.248215	0.241	0.311	1
Srsf7	0.187554	0.330486	0.187	0.245	1
Clec5a	0.187766	0.109826	0.052	0.073	1
Tspan13	0.189483	0.223319	0.063	0.087	1
Oaz1	0.190625	0.248973	0.33	0.42	1
Clic1	0.190673	0.36963	0.107	0.143	1
Lsm14a	0.191739	0.329182	0.051	0.073	1
Sertad1	0.191852	0.032288	0.088	0.115	1
Slu7	0.192993	0.00752148	0.073	0.098	1
Trmt1l	0.193002	0.345475	0.097	0.129	1
Wdr43	0.193907	0.0880975	0.058	0.08	1
Atp6v1g2	0.19394	0.629904	0.052	0.035	1
Scamp2	0.19466	0.129856	0.334	0.423	1
Klf4	0.194717	-0.0182802	0.332	0.406	1
Vps4b	0.194854	0.104584	0.073	0.098	1
Arf1	0.195949	0.30544	0.151	0.196	1
Srprb	0.196121	0.157493	0.084	0.112	1
Oaz1-ps	0.19657	0.342073	0.057	0.038	1
mt-Nd2	0.197592	0.209849	0.287	0.367	1
Jpt1	0.199165	0.263763	0.063	0.087	1
Hexb	0.200101	-0.0396803	0.951	0.958	1
Ppp1r12c	0.20017	0.13652	0.099	0.129	1
Nap1l4	0.201298	0.0773752	0.067	0.091	1
Ywhaq	0.201527	0.0960798	0.085	0.112	1
Cd81	0.201656	0.224	0.596	0.647	1
Dlgap4	0.202194	0.334608	0.074	0.101	1
Ctdsp1	0.202967	0.340017	0.074	0.101	1
Lhfpl2	0.203199	0.179478	0.115	0.15	1
Mylip	0.203216	0.170667	0.204	0.259	1
Slco2b1	0.203593	0.0184632	0.444	0.545	1
Gdi2	0.203606	0.271274	0.273	0.357	1
Ccpg1	0.205261	0.00604231	0.068	0.091	1
Tmsb4x	0.205894	0.186895	0.654	0.706	1
Gbgt1	0.207188	0.294375	0.058	0.08	1
Rpl13-ps3	0.207946	0.197198	0.077	0.056	1
Fbxo11	0.208702	0.127419	0.058	0.08	1
Parvb	0.209649	0.0634875	0.114	0.147	1
Bicdl2	0.211207	0.265879	0.095	0.126	1
Tpbgl	0.211737	0.350511	0.1	0.133	1
Zfp622	0.212763	0.243534	0.069	0.094	1
Prelid1	0.215415	-0.153507	0.048	0.066	1
Ube2d3	0.216588	0.233791	0.208	0.262	1
Tnfaip8	0.216866	0.19191	0.053	0.073	1
Aup1	0.217432	0.193477	0.093	0.122	1
Spns2	0.217532	0.407719	0.15	0.196	1
Ptges	0.219049	0.305029	0.19	0.245	1
Kdm6b	0.221015	0.44441	0.094	0.126	1
Ftl1-ps1	0.221293	0.300011	0.27	0.248	1
Mtus1	0.221969	0.186417	0.143	0.182	1
Rpl35a-ps2	0.222216	-0.003255	0.069	0.091	1
Rcsd1	0.223261	0.128664	0.106	0.136	1
Lgals3bp	0.223354	0.0811676	0.047	0.066	1
Glud1	0.223413	0.183622	0.088	0.115	1
9930021J03Rik	0.224503	0.0557943	0.051	0.07	1
Mfap1b	0.225334	0.129119	0.095	0.122	1
Csad	0.226914	0.0911846	0.059	0.08	1
Rpl27a-ps2	0.228267	0.217052	0.055	0.038	1
Fkbp2	0.228529	0.266528	0.088	0.115	1
Cotl1	0.228896	0.130902	0.339	0.423	1
Cdc5l	0.228905	0.246043	0.094	0.122	1
B2m	0.22927	0.0880067	0.37	0.465	1
Clcnkb	0.230041	0.265622	0.062	0.084	1
Myl12b	0.230678	-0.0442397	0.069	0.091	1
Siglech	0.231477	-0.0651645	0.59	0.682	1
Ttc28	0.23174	-0.14897	0.066	0.087	1
Ubqln1	0.232829	0.356968	0.058	0.08	1
Fibin	0.233024	0.210828	0.091	0.119	1
Tmem119	0.233025	0.178818	0.625	0.685	1
Gtf2a1l	0.233854	0.015358	0.057	0.077	1
Lcp1	0.234154	0.102981	0.285	0.35	1
Lrrk1	0.234424	0.126293	0.083	0.108	1
Zfr	0.235097	0.316898	0.084	0.112	1
Reps2	0.235378	0.152089	0.395	0.462	1
Usp4	0.235489	0.217292	0.051	0.07	1
Eme1	0.235755	0.227571	0.32	0.413	1
Tcof1	0.236569	0.313333	0.076	0.101	1
Rpl21-ps15	0.237089	-0.0460344	0.058	0.077	1
Ppp1r15b	0.237148	0.160393	0.054	0.073	1
Kdm2b	0.238848	-0.0220259	0.051	0.07	1
Slc38a10	0.239612	0.213304	0.111	0.143	1
Rpl14	0.239744	0.101001	0.466	0.552	1
Prdx5	0.241359	-0.105409	0.061	0.08	1
Rab5a	0.241712	-0.152755	0.054	0.073	1
Rpsa-ps2	0.242629	0.205517	0.058	0.042	1
Notch1	0.243373	0.135323	0.06	0.08	1
Ccdc152	0.243463	0.112847	0.074	0.098	1
Adipor2	0.243539	0.215947	0.077	0.101	1
Ankle1	0.244055	0.0634066	0.051	0.07	1
Rps16-ps2	0.244774	0.0762498	0.146	0.182	1
Mvb12b	0.24594	0.255111	0.051	0.07	1
Tubg2	0.247363	0.204024	0.054	0.073	1
Man2b1	0.247391	0.0202035	0.362	0.437	1
Phrf1	0.247553	0.181302	0.045	0.063	1
Ppp1r11	0.248	0.124488	0.06	0.08	1
Fcer1g	0.248107	0.0852707	0.412	0.514	1
Srsf3	0.248768	0.329131	0.247	0.311	1
Relt	0.248857	0.283155	0.092	0.119	1
Creg1	0.249107	0.0895403	0.493	0.591	1
Rhebl1	0.2492	0.173127	0.074	0.098	1
Dot1l	0.249712	0.0837461	0.072	0.094	1
Mcrip1	0.250636	0.258779	0.054	0.073	1
Echs1	0.250759	0.130217	0.072	0.094	1
Rpl17-ps3	0.25178	0.316371	0.2	0.178	1
Sned1	0.251872	0.14382	0.159	0.199	1
Rplp1	0.252151	0.255583	0.272	0.339	1
Ppp4c	0.253711	0.27766	0.071	0.094	1
Akt1	0.254097	0.352818	0.059	0.08	1
Arrdc3	0.255212	0.490205	0.069	0.052	1
Elmo3	0.256425	0.185609	0.06	0.08	1
Pigk	0.260764	-0.0843793	0.058	0.077	1
Rpl10-ps5	0.261774	0.0452834	0.118	0.147	1
Cfh	0.262923	0.0940661	0.366	0.441	1
C1qa	0.263092	-0.0157753	0.676	0.748	1
Ly86	0.264164	0.302979	0.245	0.308	1
Rap1gds1	0.267735	0.0974728	0.107	0.136	1
Snta1	0.267811	0.17612	0.275	0.346	1
Ncf4	0.268876	0.352107	0.051	0.07	1
Mfap3	0.269308	0.302241	0.072	0.094	1
Son	0.270802	0.00868377	0.543	0.65	1
Os9	0.27106	0.442866	0.147	0.189	1
Ulk2	0.271102	0.0626396	0.073	0.094	1
Junb	0.273772	-0.0325139	0.751	0.832	1
Igsf6	0.274985	0.103795	0.04	0.056	1
Ssr3	0.275887	0.189299	0.054	0.073	1
Mtmr6	0.275995	0.393622	0.051	0.07	1
Zfp326	0.276284	0.251896	0.063	0.084	1
Lgsn	0.278203	-0.0641758	0.549	0.643	1
Rflnb	0.278472	0.134753	0.061	0.08	1
Edf1	0.279073	0.0237467	0.05	0.066	1
Rpl23a	0.279593	0.287743	0.133	0.164	1
Azin1	0.27976	-0.0789049	0.059	0.077	1
Atp8a2	0.280131	0.00762374	0.08	0.101	1
Ctrb1	0.280649	0.0934533	0.077	0.098	1
Slc15a3	0.281158	-0.064513	0.058	0.077	1
Rnf216	0.284184	0.305518	0.089	0.115	1
Baz2a	0.285686	0.0588286	0.062	0.08	1
Rims3	0.28633	0.124443	0.055	0.073	1
Psmb8	0.287217	0.329699	0.127	0.161	1
Ctso	0.289293	-0.0503078	0.977	0.99	1
Eef2k	0.289797	-0.10246	0.109	0.136	1
Gpx1	0.290367	0.333355	0.135	0.171	1
Ctc1	0.291267	0.179741	0.105	0.133	1
Rbm28	0.291288	0.288447	0.081	0.105	1
Gsta1	0.291416	0.186463	0.064	0.084	1
Ahsa1	0.291531	0.371748	0.075	0.098	1
Smug1	0.292744	0.224494	0.174	0.217	1
Sdhb	0.294319	0.101825	0.058	0.077	1
Rpl30-ps9	0.295721	0.0475323	0.107	0.133	1
Ppp1r9a	0.296346	0.507797	0.122	0.157	1
Ddx47	0.296417	0.184162	0.047	0.063	1
Csnk1g2	0.297662	0.229104	0.055	0.073	1
Fam173a	0.299196	-0.0421548	0.047	0.063	1
Ptp4a3	0.299812	0.206479	0.07	0.091	1
Mrps24	0.301242	0.282627	0.076	0.098	1
Clba1	0.301461	0.445818	0.346	0.357	1
Itgb3	0.301522	-0.0273344	0.059	0.077	1
Lasp1	0.301914	0.0380309	0.417	0.514	1
Zfp740	0.302659	0.2473	0.062	0.08	1
Taldo1	0.30275	0.0448195	0.074	0.094	1
Ppp1r14b	0.305117	-0.0939693	0.066	0.084	1
Mrm2	0.305493	0.122258	0.053	0.07	1
Atp5c1	0.30671	0.270782	0.064	0.084	1
Tbc1d9b	0.306854	0.268328	0.17	0.21	1
Pde7b	0.307972	0.300867	0.076	0.098	1
Sfswap	0.308537	0.479856	0.075	0.098	1
Rab35	0.308939	-0.0312852	0.072	0.091	1
Rpl31-ps9	0.310064	0.225011	0.075	0.059	1
Micos10	0.310709	0.215498	0.053	0.07	1
Dhrs7	0.310836	0.131013	0.056	0.073	1
Cnppd1	0.31123	0.152735	0.065	0.084	1
Ablim1	0.311701	0.356208	0.111	0.14	1
Arap1	0.31413	0.206097	0.073	0.094	1
Orai1	0.314352	0.0617412	0.062	0.08	1
Sppl3	0.314461	0.0804633	0.066	0.084	1
Slc15a4	0.317399	0.283001	0.053	0.07	1
Washc4	0.31824	0.187499	0.104	0.129	1
Rrbp1	0.318373	0.0620724	0.702	0.741	1
Rpl6	0.318638	0.139343	0.516	0.591	1
Sec14l1	0.320077	0.156111	0.104	0.129	1
Rpl39l	0.320088	0.272216	0.065	0.084	1
Phf20l1	0.321871	0.254222	0.135	0.168	1
Arrb2	0.322016	0.223991	0.18	0.22	1
Evl	0.322475	0.282126	0.099	0.126	1
Phf20	0.325048	0.0136888	0.063	0.08	1
Ctsd	0.326862	0.0786901	0.906	0.934	1
Smurf1	0.328181	0.148327	0.074	0.094	1
P4hb	0.328362	0.416237	0.206	0.262	1
Hmgcll1	0.328443	0.334031	0.157	0.196	1
Rerg	0.328609	-0.10201	0.057	0.073	1
mt-Co2	0.330113	0.178341	0.344	0.416	1
Mepce	0.330369	0.310653	0.062	0.08	1
Eif3h	0.331537	0.219804	0.086	0.108	1
Eif3d	0.332313	0.0800036	0.057	0.073	1
Rpl28	0.334336	0.0966703	0.184	0.217	1
Fuca2	0.335491	-0.0203374	0.054	0.07	1
Oxgr1	0.336778	0.340267	0.065	0.084	1
Ap1b1	0.33691	0.239552	0.151	0.185	1
Otud5	0.338106	0.176594	0.06	0.077	1
Fkbp5	0.338252	0.624766	0.073	0.059	1
Ctcf	0.340537	0.187717	0.099	0.122	1
Creld2	0.342683	0.212148	0.057	0.073	1
Map1lc3b	0.343277	0.368795	0.109	0.136	1
Pacsin2	0.34343	0.483538	0.124	0.157	1
Nisch	0.343789	0.231603	0.13	0.161	1
Rps6-ps4	0.344437	0.266999	0.163	0.143	1
Rpl23a-ps3	0.344867	0.121359	0.084	0.105	1
Litaf	0.346104	0.218612	0.063	0.08	1
Mef2b	0.347772	0.23521	0.069	0.087	1
Liph	0.34791	-0.0278627	0.058	0.073	1
Nop56	0.348864	0.274888	0.197	0.238	1
B230219D22Rik	0.350055	-0.0734895	0.046	0.059	1
Ugt1a6a	0.35058	0.0290716	0.051	0.066	1
Nfkbiz	0.353319	0.136816	0.204	0.245	1
Synj1	0.355513	0.61829	0.073	0.059	1
Rpl3-ps1	0.356126	0.430724	0.131	0.115	1
Cr2	0.356582	0.288747	0.057	0.073	1
Pkn3	0.358327	0.053377	0.061	0.077	1
Mblac1	0.359663	0.281345	0.072	0.091	1
Sec31a	0.361781	0.0265075	0.054	0.07	1
Spata13	0.361875	0.119743	0.12	0.147	1
Eif2b2	0.366817	0.367364	0.102	0.126	1
Plgrkt	0.367568	0.170942	0.067	0.084	1
Rps3a2	0.371158	0.249197	0.096	0.08	1
Polr2a	0.371786	0.189826	0.054	0.07	1
Rps23-ps1	0.373592	0.15081	0.088	0.108	1
Gtf2i	0.373971	0.595029	0.105	0.133	1
Hnrnph2	0.374274	0.210155	0.058	0.073	1
Parp1	0.37432	0.285558	0.081	0.101	1
Grk2	0.374334	0.361458	0.144	0.178	1
Srsf2	0.375107	0.147681	0.328	0.392	1
Ftl1	0.375889	0.186218	0.601	0.619	1
Atp6v0b	0.378063	0.372303	0.235	0.294	1
Tnrc6a	0.381018	0.480262	0.122	0.108	1
Uqcrc1	0.381913	0.0542487	0.052	0.066	1
Ptprcap	0.385647	0.335703	0.058	0.045	1
Eif1b	0.385739	0.242486	0.272	0.325	1
Gnas	0.386298	0.134054	0.35	0.42	1
Inca1	0.386474	0.341826	0.182	0.224	1
Ptges3l	0.388486	0.325335	0.061	0.077	1
Cox4i1	0.389917	0.228968	0.145	0.175	1
Atp5a1	0.391209	0.188329	0.134	0.161	1
mt-Cytb	0.391296	0.492864	0.346	0.367	1
Twf2	0.392001	0.537701	0.103	0.129	1
Morf4l1-ps1	0.394624	0.393293	0.148	0.136	1
Ung	0.397147	0.143884	0.715	0.72	1
Cntn3	0.397374	0.0279465	0.993	0.997	1
Pnpla8	0.398274	0.33252	0.084	0.105	1
Iglc1	0.398798	0.194126	0.07	0.087	1
Scly	0.39969	0.31686	0.088	0.108	1
Ints2	0.402208	-0.0587722	0.774	0.843	1
[truncated: 268 more rows]
